# Supplementary material
Source: PubMed Central journal article supplement (PMC5890317)

## Supporting Information

### Reagent controlled stereoselective synthesis of $\alpha$ -glucans

Liming Wang, Herman S. Overkleeft, Gijsbert A. van der Marel, Jeroen D. C. Codée\*

Leiden institute of Chemistry, Leiden University, Einsteinweg 55, 2333 CC Leiden, The Netherlands

### Table of Contents

|                                                                     |     |
|---------------------------------------------------------------------|-----|
| General experimental procedures .....                               | S2  |
| Experimental Procedures and Characterization Data of Products ..... | S3  |
| References .....                                                    | S31 |
| NMR Spectra .....                                                   | S32 |

## General experimental procedures

All reagents were of commercial grade and used as received. All moisture sensitive reactions were performed under an argon atmosphere. DCM used in the glycosylation reactions was dried with flamed 4 Å molecular sieves before being used. Reactions were monitored by TLC analysis with detection by UV (254 nm) and where applicable by spraying with 20% sulfuric acid in EtOH or with a solution of  $(\text{NH}_4)_6\text{Mo}_7\text{O}_{24}\cdot 4\text{H}_2\text{O}$  (25 g/L) and  $(\text{NH}_4)_4\text{Ce}(\text{SO}_4)_4\cdot 2\text{H}_2\text{O}$  (10 g/L) in 10% sulfuric acid (aq.) followed by charring at  $\sim 150^\circ\text{C}$ . Flash column chromatography was performed on silica gel (40-63  $\mu\text{m}$ ).  $^1\text{H}$  and  $^{13}\text{C}$  spectra were recorded on a Bruker AV 400 and Bruker AV 500 in  $\text{CDCl}_3$  or  $\text{D}_2\text{O}$ . Chemical shifts ( $\delta$ ) are given in ppm relative to tetramethylsilane as internal standard ( $^1\text{H}$  NMR in  $\text{CDCl}_3$ ) or the residual signal of the deuterated solvent. Coupling constants ( $J$ ) are given in Hz. All  $^{13}\text{C}$  spectra are proton decoupled. NMR peak assignments were made using COSY and HSQC experiments, where applicable Clean TOCSY, HMBC and GATED experiments were used to further elucidate the structure. The anomeric product ratios were analyzed through integration of proton NMR signals and HPLC. HPLC analysis was performed over chiralpak AD column (0.46 cm  $\Phi$   $\times$  25 cm) and eluted with hexane/isopropanol (95/5) mixture at a 1 mL/min flow rate and UV 254 nm detector. Column chromatography was carried out using silica gel (0.040-0.063 mm). Size-exclusion chromatography was carried out using Sephadex LH-20.

### Standard procedure for glycosylation of secondary alcohols with thiodonors (2a-5a) (procedure A)

The donor (1.0 eq, co-evaporated with toluene) was dissolved in dry DCM (see experimental description below for concentrations) under nitrogen and stirred over fresh flame-dried molecular sieves 3A, after which DMF (16 eq) was added to the solution. The solution was cooled to  $0^\circ\text{C}$ , after which NIS (1.0 eq) and TMSOTf (1.0 eq) were added. After 1 h, the pre-activation was complete as indicated by TLC-analysis. Then acceptor (0.7 eq, see experimental description below for concentrations) was added to the solution. The reaction was stirred at  $0^\circ\text{C}$  until TLC-analysis showed complete conversion of the acceptor. The reaction mixture was diluted and the reaction was quenched with saturated  $\text{Na}_2\text{S}_2\text{O}_3$ . The organic phase was washed with water and brine, dried with anhydrous  $\text{MgSO}_4$ , filtered and concentrated *in vacuo*. The products were purified by size exclusion (eluent (50/50) MeOH/DCM and silica gel column chromatography (See experimental description below for eluent system)).

### Standard procedure for glycosylation of secondary alcohols with imidate donors (2b-5b) (procedure B)

The donor (1.0 eq, co-evaporated with toluene) was dissolved in dry DCM (see experimental description below for concentrations) under nitrogen and stirred over fresh flame-dried molecular sieves 3A, after which DMF (16 eq) was added to the solution. The solution was cooled to  $-78^\circ\text{C}$ , after which TfOH (1.0 eq) was added. After 30 min, the pre-activation was complete as indicated by TLC-analysis. Acceptor (0.7 eq, see experimental description below for concentrations) was added to the solution and the mixture was placed in an ice bath. The reaction was stirred at  $0^\circ\text{C}$  until TLC-analysis showed complete conversion of the acceptor. The reaction was quenched with  $\text{Et}_3\text{N}$ , filtered and concentrated *in vacuo*. The products were purified by size exclusion (eluent

(50/50) MeOH/DCM and silica gel column chromatography (See experimental description below for eluent system).

#### **Standard procedure for the glycosylation of primary alcohols (procedure C)**

A mixture of donor (1.0 eq), acceptor (0.7 eq) was co-evaporated with toluene three times and together with  $\text{Ph}_3\text{P}=\text{O}$  (6 eq) dissolved in dry DCM (see experimental description below for concentrations) and stirred over fresh flame-dried molecular sieves 3A under nitrogen. Then TMSI (1.0 eq) was added slowly in the mixture. The reaction was stirred at room temperature until TLC-analysis indicated the reaction to be complete. The solution was diluted and the reaction quenched with saturated  $\text{Na}_2\text{S}_2\text{O}_3$ . The organic phase was washed with water and brine, dried with anhydrous  $\text{MgSO}_4$ , filtered and concentrated *in vacuo*. The products were purified by size exclusion (eluent (50/50) MeOH/DCM and silica gel column chromatography (See experimental description below for eluent system)).

#### **General procedure for deprotection of the Nap protecting group (general procedure D)**

The starting material (1.0 eq) was dissolved in  $\text{CH}_2\text{Cl}_2$  (DCM): $\text{H}_2\text{O}$  (10:1, 0.1 M). DDQ (1.1 eq) was added to the mixture. The reaction stirred until TLC-analysis indicated full consumption of the starting material ( $\pm 2$ h). Then the mixture was diluted with DCM and the reaction quenched with saturated  $\text{Na}_2\text{S}_2\text{O}_3$ . The organic phase was washed with water and brine, dried with anhydrous  $\text{MgSO}_4$ , filtered and concentrated *in vacuo*. The product was purified by silica gel column chromatography (See experimental description below for eluent system).

#### **General procedure for deprotection of the PMB protecting group (general procedure E)**

The starting material (1.0 eq) and triethylsilane (1.0 eq) were dissolved in DCM:HFIP (hexafluoro-*iso*-propanol) (1:1, 0.1 M). Then 0.2M HCl in HFIP (0.1 eq) was added to the mixture. The reaction was stirred until TLC-analysis indicated complete consumption of the starting material ( $\pm 30$  min.). Then the mixture was diluted with DCM and the reaction quenched with saturated  $\text{Na}_2\text{CO}_3$ . The organic phase was washed with water and brine, dried with anhydrous  $\text{MgSO}_4$ , filtered and concentrated *in vacuo*. The product was purified by silica gel column chromatography (See experimental description below for eluent system).

### **Experimental Procedures and Characterization Data of Products**

For the synthesis procedure and data of known compounds **2a**<sup>S1</sup>, **2b**<sup>S2,10</sup>, **3a**<sup>S3</sup>, **4a**<sup>S4</sup>, **6**<sup>S5,6</sup>, **7**<sup>S5,7</sup>, **8**<sup>S5,8</sup>, **9**<sup>S10</sup>, **11**<sup>S10</sup>, **12**<sup>S10</sup>, **22**<sup>S5,9</sup>, **23**<sup>S10</sup> see references.

Scheme S1. Preparation of **3b** and **4b**.

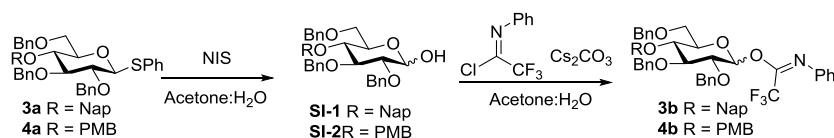

#### N-phenyl trifluoroacetimidate glucose donor **3b**

Compound **3a** (8.0 g, 11.7 mmol) was dissolved in acetone:H<sub>2</sub>O (10:1, 120 mL). N-Iodosuccinimide (NIS) (5.27 g, 23.4 mmol) was added in one portion and the reaction was stirred at room temperature for 2 hours. The solution was diluted with DCM and the reaction was quenched with saturated aqueous Na<sub>2</sub>S<sub>2</sub>O<sub>3</sub>, then the organic layer was washed with water and brine. The organic layer was dried with anhydrous MgSO<sub>4</sub>, filtered and concentrated *in vacuo*, and the product purified by column chromatography (PE:EA = 2:1). Compound **SI-1** (6.37 g, 92% yield) was obtained as a white solid. Next, compound **SI-1** (6.37 g, 10.8 mmol) was dissolved in acetone:H<sub>2</sub>O (10:1, 110 mL). Cs<sub>2</sub>CO<sub>3</sub> (5.27 g, 16.2 mmol) and 2,2,2-trifluoro-N-phenylacetimidoyl chloride (2.62 ml, 16.2 mmol) were added to the solution respectively. The reaction stirred overnight, then quenched with Et<sub>3</sub>N, filtered and concentrated *in vacuo*. The product was purified by column chromatography (PE:EA = 50:1-20:1). Compound **3b** (7.89 g, 96% yield, mixture of  $\alpha$  and  $\beta$ , PE:EA = 10:1, R<sub>f</sub> = 0.45-0.55) was obtained as yellow syrup.

<sup>1</sup>H-NMR (CDCl<sub>3</sub>, 500 MHz, 60°C)  $\delta$  7.77-6.72(m, aromatic H), 6.46 (bs, 1 H, H-1 $\alpha$ ), 5.61 (bs, 1 H, H-1 $\beta$ ), 5.00-4.71 (m, CHH), 4.58-4.43 (m, CHH), 4.06 (t, J = 9.0 Hz, 1 H, H- $\alpha$ ), 3.99 (bd, 1 H, H- $\alpha$ ), 3.80-3.68 (m), 3.42 (bs, 1 H). <sup>13</sup>C-APT (CDCl<sub>3</sub>, 125 MHz, 60°C)  $\delta$  143.93, 143.73, 143.42, 138.94, 138.72, 138.32, 138.22, 138.14, 138.12, 135.91, 135.82, 133.57, 133.54, 133.28, 133.26 (aromatic C), 129.42, 128.81, 128.58, 128.55, 128.49, 128.46, 128.21, 128.17, 128.06, 128.05, 127.98, 127.94, 127.90, 127.80, 127.94, 127.90, 127.80, 127.74, 127.71, 127.68, 126.72, 126.70, 126.42, 126.17, 126.06, 126.00, 124.44, 124.30, 120.75, 119.66, 119.59 (aromatic CH), 116.50 (q, CF<sub>3</sub>), 97.65 (C-1 $\beta$ ), 93.95 (C-1 $\alpha$ ), 84.76 ( $\beta$ ), 81.77 ( $\alpha$ ), 81.25 ( $\beta$ ), 79.73 ( $\alpha$ ), 77.61 ( $\beta$ ), 77.34 ( $\alpha$ ), 76.06 ( $\beta$ ), 75.79, 75.60, 75.32, 75.07, 75.05, 73.72, 73.64, 73.57 ( $\alpha$ ), 73.52, 68.69 (C-6 $\alpha$  and  $\beta$ ). HR-MS: Calculated for C<sub>43</sub>H<sub>42</sub>F<sub>3</sub>O<sub>7</sub>N [M-[O(C=NPh)CF<sub>3</sub>]+OH+Na]<sup>+</sup>: 593.2510, found:593.2516.

#### N-phenyl trifluoroacetimidate glucose donor **4b**

Compound **4a** (10 g, 15.1 mmol) was dissolved in acetone:H<sub>2</sub>O (10:1, 150 mL). N-Iodosuccinimide (NIS) (6.79 g, 30.2 mmol) was added in one portion and the reaction was stirred at room temperature for 2 hours. The solution was diluted with DCM and the reaction was quenched with saturated aqueous Na<sub>2</sub>S<sub>2</sub>O<sub>3</sub>, then the organic layer was washed with water and brine. The organic layer was dried with anhydrous MgSO<sub>4</sub>, filtered and concentrated *in vacuo*, and the product purified by column chromatography (PE:EA = 2:1). Compound **SI-2** (7.40 g, 86% yield) was obtained as a white solid. Next, compound **SI-2** (7.40 g, 10.8 mmol) was dissolved in acetone:H<sub>2</sub>O (10:1, 110 mL). Cs<sub>2</sub>CO<sub>3</sub> (6.34 g, 19.4 mmol) and 2,2,2-trifluoro-N-phenylacetimidoyl chloride (3.15 ml, 19.4 mmol) were added to the solution respectively. The reaction stirred overnight, then quenched



with Et<sub>3</sub>N, filtered and concentrated *in vacuo*. The product was purified by column chromatography (PE:EA = 50:1-20:1). Compound **4b** (9.14 g, 95% yield, mixture of  $\alpha$  and  $\beta$ , PE:EA = 10:1, R<sub>f</sub> = 0.34) was obtained as yellow syrup.

<sup>1</sup>H-NMR (CDCl<sub>3</sub>, 500 MHz, 60°C)  $\delta$  7.79-6.70 (m, aromaticH), 6.44 (bs, 1 H, H-1 $\alpha$ ), 5.57 (bs, 1 H, H-1 $\beta$ ), 4.97-4.70 (m, CHH), 4.60-4.47 (m, CHH), 4.01 (t, J = 9.5 Hz, 1 H, H- $\alpha$ ), 3.94 (bd, 1 H, H- $\alpha$ ), 3.75-3.61 (m), 3.36 (bs, 1 H). <sup>13</sup>C-APT (CDCl<sub>3</sub>, 125 MHz, 60°C)  $\delta$  159.66, 143.94, 143.73, 139.00, 138.78, 138.38, 138.28, 138.14, 130.67, 130.57 (aromatic C), 129.68, 129.64, 129.46, 128.80, 128.57, 128.54, 128.51, 128.48, 128.46, 128.18, 127.96, 127.92, 127.80, 127.78, 127.74, 127.70, 127.66, 126.46, 124.43, 124.27, 120.78, 119.65, 119.58 (aromatic CH), 116.48 (q, CF<sub>3</sub>), 114.12, 114.10 (aromatic CH), 97.64 (C-1 $\beta$ ), 93.91 (C-1 $\alpha$ ), 84.78, 81.78, 81.25, 79.70, 77.32, 77.07, 76.07, 75.75, 75.58, 75.06, 74.95, 74.70, 73.72, 73.64, 73.56, 73.52, 68.71 (C-6), 68.69 (C-6), 55.39 (OCH<sub>3</sub>), 55.38 (OCH<sub>3</sub>). HR-MS: Calculated for C<sub>46</sub>H<sub>42</sub>F<sub>3</sub>O<sub>6</sub>N [M-[O(C=NPh)CF<sub>3</sub>]+OH+Na]<sup>+</sup>: 613.2561, found: 613.2562.

### Scheme S2. Preparation of **5b**.

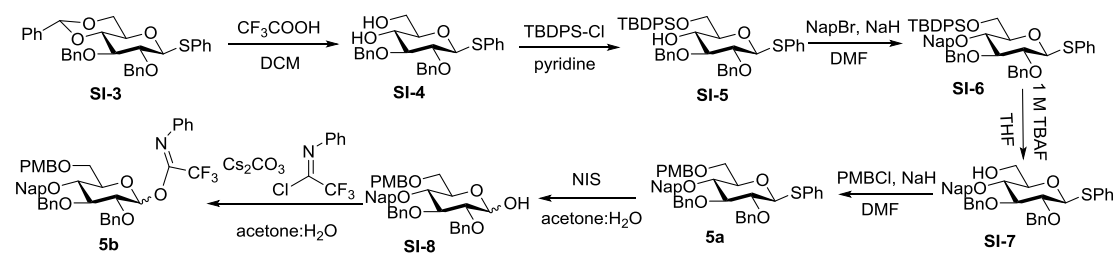

CF<sub>3</sub>COOH was added to the solution of **SI-3** (16.9 g, 31.2 mmol) in wet DCM (160 mL). After TLC-analysis showed complete consumption of the starting material, the reaction was quenched with Et<sub>3</sub>N. Then the mixture was diluted with DCM, washed with water and brine, dried with anhydrous MgSO<sub>4</sub>, filtered and concentrated *in vacuo*. The product **SI-4** (10.6 g, 75% yield) was purified by column chromatography (PE:EA = 2:1). Compound **SI-4** (10.6 g, 23.4 mmol) was dissolved in pyridine (60 mL). TBDPS-Cl (6.08 ml, 23.4 mmol) was added to the solution. After TLC-analysis showed complete consumption of the starting material, the reaction was quenched with saturated NaHCO<sub>3</sub>. The mixture was diluted with DCM, washed with H<sub>2</sub>O and brine, dried with anhydrous MgSO<sub>4</sub>, filtered, concentrated *in vacuo*, purified by column chromatography (PE:EA = 20:1). Compound **SI-5** (12.9 g, 80% yield) was obtained as colorless solid. The compound **SI-5** (12.9 g, 18.7 mmol) was dissolved in DMF (75 mL). Sodium hydride (1.34g, 56 mmol) and NapBr (5.37 g, 24.3 mmol) were added to the mixture at 0 °C under N<sub>2</sub>. The reaction was stirred at room temperature until TLC-analysis showed complete consumption of the starting material. The mixture was poured in cold water, diluted with Et<sub>2</sub>O, washed with H<sub>2</sub>O and brine, dried with anhydrous MgSO<sub>4</sub>, filtered and concentrated *in vacuo*. The compound **SI-6** (14.4 g, 93% yield) was obtained as yellow syrup. Compound **SI-6** (14.4g, 17.3 mmol) was treated with 1M TBAF in THF (52.0 ml, 52.0 mmol). After TLC-analysis showed complete consumption of the starting material, the reaction was quenched with saturated NaHCO<sub>3</sub>. The mixture was diluted with DCM, washed with H<sub>2</sub>O and brine, dried with anhydrous MgSO<sub>4</sub>, filtered and concentrated *in vacuo*. The crude compound **SI-7** was dissolved in DMF (70 mL). Sodium hydride (1.25 g, 52 mmol) and PMBCl (3.52 ml, 26.0 mmol) were added to the mixture at 0 °C under N<sub>2</sub>. The reaction was stirred at room

temperature until TLC-analysis showed complete consumption of the starting material. The mixture was poured in cold water, diluted with Et<sub>2</sub>O, washed with H<sub>2</sub>O and brine, dried with anhydrous MgSO<sub>4</sub>, filtered and concentrated *in vacuo*. The crude compound was crystallization from EtOH. Compound **5a** (9.70g, 78% yield over two steps, PE:EA = 4:1, R<sub>f</sub> = 0.63, melting point 90.4-91 °C) was obtained as a white solid.

[α]<sub>D</sub><sup>20</sup> +0.9 (c=1, CHCl<sub>3</sub>). IR (neat, cm<sup>-1</sup>) ν 696, 744, 818, 1029, 1066, 1084, 1125, 1247, 1363, 1512, 1612, 2860, 2920. <sup>1</sup>H-NMR (CDCl<sub>3</sub>, 400 MHz) δ 7.78-7.71 (m, 3 H, aromatic H), 7.602-7.57 (m, 3 H, aromatic H), 7.45-7.38 (m, 4 H, aromatic H), 7.33-7.20 (m, 14 H, aromatic H), 6.84-6.79 (m, 2 H, aromatic H), 4.96-4.84 (m, 4 H, 4 CHH), 4.75-4.67 (m, 3 H, H-1, 2 CHH), 4.54 (d, J = 11.6 Hz, 1 H, CHH), 4.42 (d, J = 11.6 Hz, 1 H, CHH), 3.77-3.69 (m, 7 H), 3.56-3.51 (m, 2 H). <sup>13</sup>C-APT (CDCl<sub>3</sub>, 100 MHz,) δ 159.18, 138.49, 138.08, 135.60, 133.98, 133.26, 132.99 (aromatic C), 131.88 (aromatic CH), 130.29 (aromatic C), 129.43, 128.94, 128.58, 128.47, 128.45, 128.25, 128.15, 127.95, 127.89, 127.78, 127.70, 127.69, 127.43, 126.61, 126.11, 125.96, 125.93, 113.91, 113.76 (aromatic CH), 87.54 (C-1), 86.79, 80.91, 79.12, 77.79, 75.82, 75.44, 75.04, 73.08, 68.61, 64.83 (C-6), 55.19 (OCH<sub>3</sub>). HR-MS: Calculated for C<sub>45</sub>H<sub>44</sub>O<sub>6</sub>S [M+Na]<sup>+</sup>: 735.2751, found: 735.2760.

Compound **5a** (9.63g, 13.5 mmol) was dissolved in acetone:H<sub>2</sub>O (10:1, 135 mL). NIS (6.08 g, 27.0 mmol) was added in a portion. The reaction was stirred at room temperature for 2 hours, after which the solution was diluted with DCM and the reaction quenched with saturated Na<sub>2</sub>S<sub>2</sub>O<sub>3</sub>. Then the organic layer was washed with water and brine, dried with anhydrous MgSO<sub>4</sub>, filtered and concentrated *in vacuo*. The crude product was purified by column chromatography (PE:EA = 3:1). Compound **SI-8** (7.30 g, 87% yield) was obtained as white solid. Then compound **SI-8** (7.30 g, 11.7 mmol) was dissolved in acetone:H<sub>2</sub>O (10:1, 120 mL). Cs<sub>2</sub>CO<sub>3</sub> (5.75g, 17.6 mmol) and 2,2,2-trifluoro-N-phenylacetimidoyl chloride (2.86 mL, 17.6 mmol) were added to the solution respectively. The reaction was stirred overnight, then quenched with Et<sub>3</sub>N, filtered and concentrated *in vacuo*. The product was purified by column chromatography (PE:EA = 50:1-20:1). Compound **5b** (8.50 g, 91% yield, mixture of α and β, PE:EA = 10:1, R<sub>f</sub> = 0.25-0.36) was obtained as yellow syrup.

<sup>1</sup>H-NMR (CDCl<sub>3</sub>, 500 MHz, 60 °C) δ 7.78-6.72 (m, aromatic H), 6.46 (bs, 1 H, H-1α), 5.60 (bs, 1 H, H-1β), 4.98-4.37 (m, CHH), 4.05 (t, J = 9.5 Hz, 1 H, H-α), 3.97 (bd, 1 H, H-α), 3.78-3.64 (m), 3.40 (bs, 1 H). <sup>13</sup>C-APT (CDCl<sub>3</sub>, 125 MHz, 60°C)δ 159.63, 159.59, 143.95, 143.75, 143.44, 138.97, 138.74, 138.15, 138.13, 135.95, 135.86, 133.58, 133.55, 133.28, 133.27, 130.41, 130.29 (aromatic C), 129.62, 129.56, 129.46, 128.81, 128.59, 128.55, 128.48, 128.46, 128.19, 128.08, 128.07, 127.98, 127.95, 127.80, 127.76, 127.71, 127.67, 126.66, 126.45, 126.16, 126.04, 125.99, 124.44, 124.30, 120.75, 119.68, 119.60 (aromatic CH), 116.50 (q, CF<sub>3</sub>), 114.10, 114.08 (aromatic CH), 97.65 (C-1β), 93.97 (C-1α), 84.78, 81.78, 81.26, 79.71, 77.62, 77.34, 76.06, 75.79, 75.61, 75.30, 75.07, 75.05, 73.54, 73.52, 73.33, 73.27, 68.25 (C-6), 68.22 (C-6), 55.31 (OCH<sub>3</sub>). HR-MS: Calculated for C<sub>47</sub>H<sub>44</sub>F<sub>3</sub>O<sub>7</sub>N [M-[O(C=NPh)CF<sub>3</sub>]+OH+Na]<sup>+</sup>: 643.2666, found: 643.2676.

#### Activation of donor **4b** using TMSI with or without Ph<sub>2</sub>MeP=O.

TMSI (10 μL, 0.07 mmol) was added to a solution of donor **4b** (51 mg, 0.07 mmol), with or without

Ph<sub>2</sub>MeP=O (91 mg, 0.42 mmol) in CDCl<sub>3</sub> (0.6 mL) in a normal NMR tube under N<sub>2</sub> at room temperature. Spectra were recorded every 10 min.

**Figure S1.** Activation study of donor **4b** using NMR (for full NMR spectra: see below)

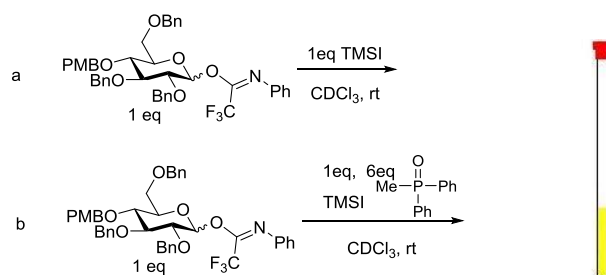

The following NMR spectra were obtained (from bottom to top): Starting donor; Activation with TMSI (after 5 min); Activation with TMSI and Ph<sub>2</sub>MeP=O (after 55 min)

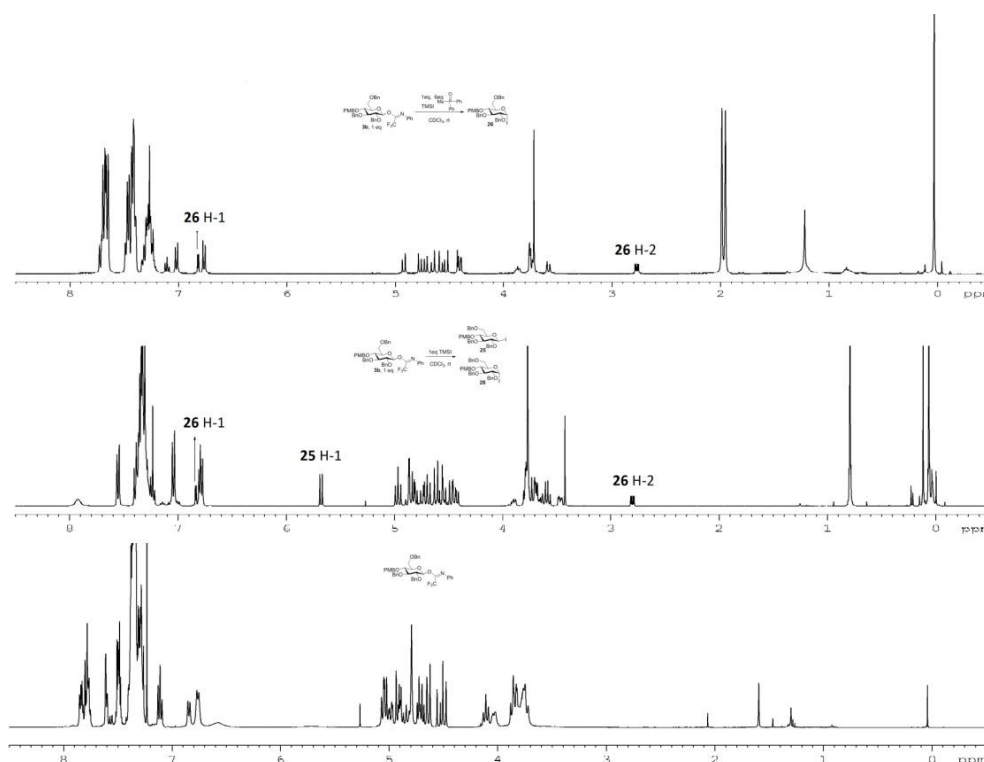

#### Synthesis of diglucoside **9** using NIS/TMSOTf

The donor **2a** (102 mg, 0.16 mmol) and acceptor **6** (50 mg, 0.11 mmol) were co-evaporated with toluene 3 times, then dissolved in dry DCM (2 mL) under nitrogen and stirred over fresh flame-dried molecular sieves 3A. The solution was cooled to 0 °C, after which NIS (36 mg, 0.16 mmol) and TMSOTf (29 μL, 0.16 mmol) were added. The reaction was stirred at 0 °C until TLC-analysis showed complete conversion of the acceptor. The reaction was quenched with saturated Na<sub>2</sub>S<sub>2</sub>O<sub>3</sub>, then the organic layer was washed with water and brine, dried with anhydrous MgSO<sub>4</sub>, filtered and concentrated *in vacuo*. The crude product was purified by size exclusion (DCM:MeOH = 1:1). Compound **9** (91mg, 86% yield, α:β= 2:1, PE:EA = 4:1, R<sub>f</sub> = 0.32) was obtained as a colorless syrup.

### Synthesis of diglucoside **9** using NIS/TMSOTf + DMF

The donor **2a** (102 mg, 0.16 mmol, co-evaporated with toluene 3 times) was dissolved in dry DCM (1 mL) under nitrogen and stirred over fresh flame-dried molecular sieves 3A, after which DMF (202  $\mu$ L, 2.56 mmol) was added to the solution. The solution was cooled to 0  $^{\circ}$ C, after which NIS (36 mg, 0.16 mmol) and TMSOTf (29  $\mu$ L, 0.16 mmol) were added. After 30 min, the pre-activation was complete as indicated by TLC-analysis. Acceptor **6** (50 mg, 0.11 mmol, dissolved in a little DCM and washed 2 times with DCM (totally 1 mL) was added to the solution. The reaction was stirred at 0  $^{\circ}$ C until TLC-analysis showed complete conversion of the acceptor. The reaction was quenched with saturated  $\text{Na}_2\text{S}_2\text{O}_3$ , then the organic layer was washed with water and brine, dried with anhydrous  $\text{MgSO}_4$ , filtered and concentrated *in vacuo*. The crude product was purified by size exclusion (DCM:MeOH = 1:1). Compound **9** (88 mg, 83% yield,  $\alpha:\beta > 50:1$ ) was obtained as a colorless syrup.

### Synthesis of diglucoside **10**

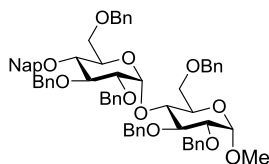

The reaction was carried out according to the standard procedure B at -78 - 0  $^{\circ}$ C. The donor **3b** (1.34g, 1.96 mmol, co-evaporated with toluene 3 times) was dissolved in dry DCM (20 mL) under nitrogen and stirred over fresh flame-dried molecular sieves 3A, after which DMF (2.47 mL, 31.4 mmol) was added to the solution. The solution was cooled to -78  $^{\circ}$ C, after which TfOH (173 $\mu$ L, 1.96 mmol) was added. After 30 min, the pre-activation was complete as indicated by TLC-analysis. Acceptor **6** (608mg, 1.31 mmol, dissolved in a little DCM and washed 3 times with DCM, totally 6 mL) was added to the solution and the mixture was placed in an ice bath. The reaction was stirred at 0  $^{\circ}$ C until TLC-analysis showed complete conversion of the acceptor. The reaction was quenched with  $\text{Et}_3\text{N}$ , filtered and concentrated *in vacuo*. The product was purified by size exclusion (DCM:MeOH = 1:1). Compound **10** (1113mg, 82% yield,  $\alpha:\beta > 20:1$ , PE:EA = 4:1,  $R_f = 0.48$ ) was obtained as a colorless syrup.  $[\alpha]_D^{20} +34.8$  ( $c=1$ ,  $\text{CHCl}_3$ ). IR (neat,  $\text{cm}^{-1}$ )  $\nu$  696, 735, 820, 857, 910, 1028, 1045, 1093, 1156, 1207, 1261, 1273, 1363, 1453, 1496, 2860, 3030.  $^1\text{H-NMR}$  ( $\text{CDCl}_3$ , 400MHz)  $\delta$  7.81-7.79 (m, 1 H, aromatic H), 7.74-7.70 (m, 2 H, aromatic H), 7.50 (bs, 1 H, aromatic H), 7.47-7.43 (m, 2 H, aromatic H), 7.30-7.18 (m, 31 H, aromatic H), 5.73 (d,  $J = 3.6\text{Hz}$ , 1 H, H-1b), 5.05 (d,  $J = 11.6\text{ Hz}$ , 1 H, CHH), 4.91 (d,  $J = 10.8\text{ Hz}$ , 1 H, CHH), 4.81 (d,  $J = 10.8\text{ Hz}$ , 1 H, CHH), 4.70 (d,  $J = 12.0\text{ Hz}$ , 1 H, CHH), 4.63-4.49(m, 8 H, 7 CHH, H-1a), 4.23 (d,  $J = 12.0\text{ Hz}$ , 1 H, CHH), 4.13-4.05 (m, 2 H, H-3a, H-4a), 3.94 (t,  $J = 9.2\text{ Hz}$ , 1 H, H-3b), 3.87-3.82 (m, 2 H, H-5a, H-6a<sub>a</sub>), 3.73-3.59 (m, 4 H, H-5a, H-4b, H-2a, H-6a<sub>b</sub>), 3.54-3.50 (m, 2H, H-2b, H-6b<sub>a</sub>), 3.40-3.37 (m, 4 H, H-6b<sub>b</sub>).  $^{13}\text{C-APT}$  ( $\text{CDCl}_3$ , 100 MHz,)  $\delta$  139.01, 138.88, 138.22, 138.05, 137.96, 136.00, 139.29, 132.99 (aromatic C), 128.54, 128.45, 128.41, 128.35, 128.32, 128.31, 128.20, 128.04, 127.96, 127.88, 127.82, 127.78, 127.74, 127.69, 127.61, 127.46, 127.29, 127.21, 126.86, 126.61, 126.15, 126.10, 125.93 (aromatic CH), 97.86 (C-1a), 96.72 (C-1b), 82.19 (C-3b), 82.15 (C-3a), 80.28 (C-2a), 79.52 (C-2b), 77.65 (C-4b), 75.66, 75.11, 74.54, 73.54, 73.49, 73.35, 73.20 (7  $\text{CH}_2$ ), 72.17 (C-4a), 71.03 (C-5a), 69.57 (C-5b),

69.05 (C-6a), 68.12 (C-6b), 55.25 (OCH<sub>3</sub>). HR-MS: Calculated for C<sub>66</sub>H<sub>68</sub>O<sub>11</sub> [M+Na]<sup>+</sup>: 1059.4654 found: 1059.4681.

#### Synthesis of diglucoside **11**

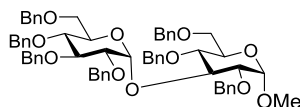

The reaction was carried out according to the standard procedure B at -78 - 0 °C. The donor **2b** (106 g, 0.15 mmol, co-evaporated with toluene 3 times) was dissolved in dry DCM (1 mL) under nitrogen and stirred over fresh flame-dried molecular sieves 3A, after which DMF (188 μL, 2.39 mmol) was added to the solution. The solution was cooled to -78 °C, after which TfOH (13 μL, 0.15 mmol) was added. After 30 min, the pre-activation was complete as indicated by TLC-analysis. Acceptor **7** (46 mg, 0.10 mmol, dissolved in a little DCM and washed 2 times with DCM, totally 1 mL) was added to the solution and the mixture was placed in an ice bath. The reaction was stirred at 0 °C until TLC-analysis showed complete conversion of the acceptor. The reaction was quenched with Et<sub>3</sub>N, filtered and concentrated *in vacuo*. The product was purified by size exclusion (DCM:MeOH = 1:1). Compound **11** (83 mg, 85% yield, α:β > 20:1, PE:EA = 4:1, R<sub>f</sub> = 0.32) was obtained as a colorless syrup.

#### Synthesis of diglucoside **12**

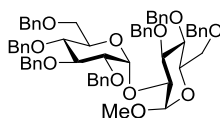

The reaction was carried out according to the standard procedure B at -78 - 0 °C. The donor **2b** (106 g, 0.15 mmol, co-evaporated with toluene 3 times) was dissolved in dry DCM (1 mL) under nitrogen and stirred over fresh flame-dried molecular sieves 3A, after which DMF (188 μL, 2.39 mmol) was added to the solution. The solution was cooled to -78 °C, after which TfOH (13 μL, 0.15 mmol) was added. After 30 min, the pre-activation was complete as indicated by TLC-analysis. Acceptor **7** (46 mg, 0.10 mmol, dissolved in a little DCM and washed 2 times with DCM, totally 1 mL) was added to the solution and the mixture was placed in an ice bath. The reaction was stirred at 0 °C until TLC-analysis showed complete conversion of the acceptor. The reaction was quenched with Et<sub>3</sub>N, filtered and concentrated *in vacuo*. The product was purified by size exclusion (DCM:MeOH = 1:1). Compound **12** (88 mg, 90% yield, α:β > 20:1, PE:EA = 4:1, R<sub>f</sub> = 0.22) was obtained as a colorless syrup.

#### Synthesis of diglucoside **13**

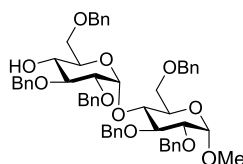

The reaction was carried out according to the general procedure D, using **12** (750mg, 0.73 mmol, 0.1 M in DCM:H<sub>2</sub>O) and DDQ (180 mg, 0.80 mmol). The product was purified by silica gel column chromatography (PE:EA = 6:1). Compound **13** (510mg, 78% yield, PE:EA = 4:1, R<sub>f</sub> = 0.20) was

obtained as a colorless syrup.  $[\alpha]_D^{20} +38.4$  ( $c=1$ ,  $\text{CHCl}_3$ ), IR (neat,  $\text{cm}^{-1}$ )  $\nu$  696, 735, 764, 910, 1027, 1046, 1093, 1153, 1208, 1456, 2867, 2923.  $^1\text{H-NMR}$  ( $\text{CDCl}_3$ , 400 MHz)  $\delta$  7.34-7.17 (m, 30 H, aromatic H), 5.71 (d,  $J = 3.6\text{ Hz}$ , 1 H, H-1b), 5.05 (d,  $J = 11.6\text{ Hz}$ , 1 H, CHH), 4.90 (d,  $J = 11.6\text{ Hz}$ , 1 H, CHH), 4.71 (d,  $J = 11.6\text{ Hz}$ , 1 H, CHH), 4.69 (d,  $J = 11.6\text{ Hz}$ , 1 H, CHH), 4.61 (d,  $J = 3.6\text{ Hz}$ , 1 H, H-1a), 4.59-4.47(m, 6 H, 6 CHH), 4.43 (d,  $J = 12.0\text{ Hz}$ , 1 H, CHH), 4.32 (d,  $J = 12.0\text{ Hz}$ , 1 H, CHH), 4.12-4.03 (m, 2 H, H-3a, H-4a), 3.88-3.83 (m, 2 H), 3.77-3.58 (m, 5 H), 3.54-3.51 (m, 2H), 3.46-3.42 (m, 2 H), 3.38 (s, 3 H,  $\text{OCH}_3$ ).  $^{13}\text{C-APT}$  ( $\text{CDCl}_3$ , 100 MHz,)  $\delta$  138.97, 138.81, 138.25, 137.97, 137.94, 137.90 (aromatic C), 128.51, 128.48, 128.38, 128.36, 128.30, 128.25, 128.13, 127.99, 127.90, 127.76, 127.69, 127.43, 127.36, 127.16, 126.75 (aromatic CH), 97.77 (C-1a), 96.58 (C-1b), 82.09 (C-3a), 81.30 (C-3b), 80.21 (C-2a), 79.02 (C-2b), 75.35, 74.43, 73.56, 73.38, 73.19, 73.12 (6  $\text{CH}_2$ ), 72.27 (C-4a), 71.48 (C-4b), 70.57 (C-5a), 69.77 (C-5b), 69.56 (C-6a), 69.03 (C-6b), 55.21 ( $\text{OCH}_3$ ). HR-MS: Calculated for  $\text{C}_{55}\text{H}_{60}\text{O}_{11}$  [ $\text{M}+\text{Na}^+$ ]: 919.4028; found: 919.4058.

#### Synthesis of triglucoside **14**

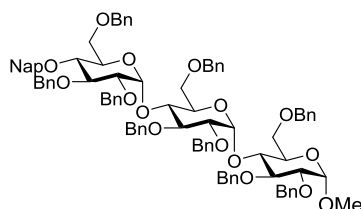

The reaction was carried out according to the standard procedure B. The donor **3b** (1.04g, 1.53 mmol, co-evaporated with toluene 3 times) was dissolved in dry DCM (10 mL) under nitrogen and stirred over fresh flame-dried molecular sieves 3A, after which DMF (1.90 mL, 24.4 mmol) was added to the solution. The solution was cooled to  $-78\text{ }^\circ\text{C}$ , after which TfOH (134  $\mu\text{L}$ , 1.52 mmol) was added. After 30 min, the pre-activation was complete as indicated by TLC-analysis. Acceptor **13** (680 mg, 0.76 mmol) dissolved in a little DCM and washed 3 times with DCM (totally 5 mL) was added to the solution and the mixture was placed in an ice bath. The reaction was stirred at  $0\text{ }^\circ\text{C}$  until TLC-analysis showed complete conversion of the acceptor. The reaction was quenched with  $\text{Et}_3\text{N}$ , filtered and concentrated *in vacuo*. The product was purified by size exclusion (DCM:MeOH = 1:1). Compound **14** (906mg, 81% yield,  $\alpha:\beta > 20:1$ , PE:EA = 4:1,  $R_f = 0.42$ ) was obtained as a colorless syrup.  $[\alpha]_D^{20} +49.4$  ( $c=1$ ,  $\text{CHCl}_3$ ). IR (neat,  $\text{cm}^{-1}$ )  $\nu$  696, 749, 764, 1028, 1043, 1094, 1154, 1275, 2870, 3030.  $^1\text{H-NMR}$  ( $\text{CDCl}_3$ , 400 MHz)  $\delta$  7.81-7.78 (m, 1 H, aromatic H), 7.74-7.68 (m, 2 H, aromatic H), 7.50 (bs, 1 H, aromatic H), 7.47-7.43 (m, 2 H, aromatic H), 7.30-7.09 (m, 46 H, aromatic H), 5.71 (d,  $J = 3.6\text{ Hz}$ , 1 H, H-1b), 5.59 (d,  $J = 3.6\text{ Hz}$ , 1 H, H-1c), 5.04 (d,  $J = 11.6\text{ Hz}$ , 1 H, CHH), 4.93 (d,  $J = 11.6\text{ Hz}$ , 1 H, CHH), 4.91 (d,  $J = 10.8\text{ Hz}$ , 1 H, CHH), 4.85-4.68 (m, 5 H, 5 CHH), 4.60-4.40 (m, 12 H), 4.24 (d,  $J = 12.0\text{ Hz}$ , 1 H, CHH), 4.11-4.02 (m, 4 H), 3.95-3.83 (m, 4 H), 3.74-3.50 (m, 9 H), 3.40-3.37 (m, 4 H).  $^{13}\text{C-APT}$  ( $\text{CDCl}_3$ , 100 MHz,)  $\delta$  139.12, 138.95, 138.89, 138.42, 138.30, 138.12, 138.01, 137.85, 136.06, 133.31, 133.00 (aromatic C), 128.55, 128.42, 128.38, 128.36, 128.34, 128.31, 128.29, 128.19, 128.05, 127.97, 127.96, 127.78, 127.76, 127.7, 127.64, 127.62, 127.60, 127.55, 127.46, 127.22, 127.13, 126.89, 126.71, 126.59, 126.15, 126.12, 125.94 (aromatic CH), 97.90 (C-1a), 96.83 (C-1b), 96.37 (C-1c), 82.23, 82.01, 81.83 (3 C-3), 80.09, 79.71, 79.67 (3 C-2), 77.66 (C-4), 75.55, 75.11, 74.57, 74.15, 73.57, 73.48, 73.32, 73.12, 73.08 ( $\text{CH}_2$ ), 73.03, 72.47 (2 C-4), 71.03, 70.83, 69.65 (3 C-5), 68.98, 68.87, 68.16 (3 C-6), 55.31 ( $\text{OCH}_3$ ). HR-MS: Calculated for  $\text{C}_{93}\text{H}_{96}\text{O}_{16}$  [ $\text{M}+\text{Na}^+$ ]: 1491.6591; found: 1491.6603.

### Synthesis of triglucoside **15**

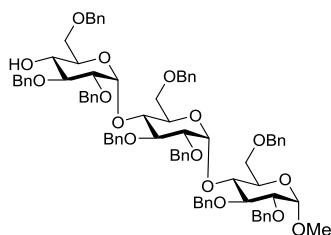

The reaction was carried out according to the general procedure D, using **14** (800mg, 0.54 mmol, 0.1 M in DCM:H<sub>2</sub>O) and DDQ (136 mg, 0.60 mmol). The product was purified by silica gel column chromatography (PE:EA = 6:1). Compound **15** (564mg, 78% yield, PE:EA = 4:1, *R*<sub>f</sub> = 0.20) was obtained as a colorless syrup.  $[\alpha]_D^{20} +41.0$  (c=1, CHCl<sub>3</sub>). IR (neat, cm<sup>-1</sup>) v 696, 735, 1028, 1042, 1077, 1081, 1094, 1125, 1132, 1154, 1364, 1453, 2854, 2930. <sup>1</sup>H-NMR (CDCl<sub>3</sub>, 400 MHz) δ 7.28-7.06 (m, 45 H, aromatic *H*), 5.71 (d, *J* = 3.6 Hz, 1 H, H-1b), 5.60 (d, *J* = 3.2 Hz, 1 H, H-1c), 5.05 (d, *J* = 11.6 Hz, 1 H, *CHH*), 4.96 (d, *J* = 11.6 Hz, 1 H, *CHH*), 4.85-4.62 (m, 2 H, 2 *CHH*), 4.77-4.39 (m, 13 H), 4.33 (d, *J* = 12.0 Hz, 1 H, *CHH*), 4.13-4.03 (m, 5 H), 3.91-3.85 (m, 3 H), 3.77-3.52 (m, 9 H), 3.47-3.42 (m, 2 H) 3.38 (s, 3 H, OCH<sub>3</sub>). <sup>13</sup>C-APT (CDCl<sub>3</sub>, 125 MHz), δ 139.19, 138.97, 138.95, 138.51, 138.24, 138.21, 138.17, 137.05, 137.88 (aromatic C), 128.56, 128.55, 128.48, 128.39, 128.35, 128.32, 128.05, 127.99, 127.85, 127.79, 127.78, 127.75, 127.70, 127.67, 127.60, 127.54, 127.48, 127.23, 127.17, 127.92, 126.72 (aromatic CH), 97.95, 96.64, 96.37 (3 C-1), 82.01, 81.83, 81.47, 80.13, 79.74, 79.25, 75.32, 74.58, 74.08, 73.70, 73.49, 73.35, 73.27, 73.08, 72.94, 72.39, 71.69, 70.88, 70.53, 69.95, 69.73, 69.03, 68.93, 55.33 (OCH<sub>3</sub>). HR-MS: Calculated for C<sub>82</sub>H<sub>88</sub>O<sub>16</sub> [M+Na<sup>+</sup>]: 1351.5965; found: 1351.6018.

### Synthesis of tetraglucoside **16**

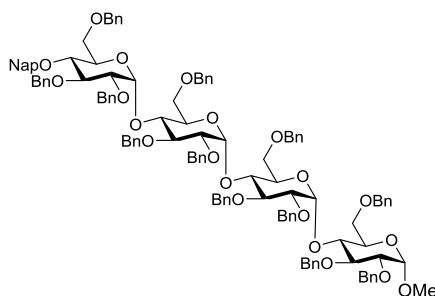

The reaction was carried out according to the standard procedure B. The donor **3b** (620 mg, 0.91 mmol, co-evaporated with toluene 3 times) was dissolved in dry DCM (5 mL) under nitrogen and stirred over fresh flame-dried molecular sieves 3A, after which DMF (1.13 mL, 14.5 mmol) was added to the solution. The solution was cooled to -78 °C, after which TfOH (80 μL, 0.91 mmol) was added. After 30 min, the pre-activation was complete as indicated by TLC-analysis. Acceptor **15** (680 mg, 0.76 mmol, dissolved in a little DCM and washed 3 times with DCM, totally 3 mL) was added to the solution and the mixture was placed in an ice bath. The reaction was stirred at 0 °C until TLC-analysis showed complete conversion of the acceptor. The reaction was quenched with Et<sub>3</sub>N, filtered and concentrated *in vacuo*. The product was purified by size exclusion (DCM:MeOH = 1:1). Compound **16** (661mg, 82% yield, α:β > 20:1, PE:EA = 4:1, *R*<sub>f</sub> = 0.33) was obtained as a colorless syrup.  $[\alpha]_D^{20} +64.8$  (c=1, CHCl<sub>3</sub>). IR (neat, cm<sup>-1</sup>) v 696, 735, 1028, 1040, 1095, 1155, 1208,

1275, 1456, 2865, 3031, 3064. <sup>1</sup>H-NMR (CDCl<sub>3</sub>, 400 MHz) δ 7.81-7.78 (m, 1 H, aromatic H), 7.74-7.68 (m, 2 H, aromatic H), 7.51 (bs, 1 H, aromatic H), 7.46-7.42 (m, 2 H, aromatic H), 7.30-7.09 (m, 61 H, aromatic H), 5.71 (d, *J* = 3.6 Hz, 1 H, H-1b), 5.60 (m, 2 H, H-1c, H-1d), 5.04 (d, *J* = 11.6 Hz, 1 H, CHH), 4.94-4.69 (m, 9 H, 9 CHH), 4.61 (d, *J* = 3.6 Hz, 1 H, H-1b), 4.60-4.37 (m, 15 H), 4.23 (d, *J* = 12.0 Hz, 1 H, CHH), 4.14-4.01 (m, 6 H), 3.96 (t, *J* = 9.2 Hz, 1 H), 3.90-3.85 (m, 4 H), 3.79-3.71 (m, 4 H), 3.66-3.50 (m, 8 H), 3.40-3.37 (m, 4 H). <sup>13</sup>C-APT (CDCl<sub>3</sub>, 100 MHz,) δ 139.09, 138.97, 138.93, 138.87, 138.42, 138.23, 138.14, 138.12, 138.09, 138.02, 137.96, 137.87, 136.02, 133.28, 132.97 (aromatic C), 128.49, 128.37, 128.27, 128.25, 128.22, 128.20, 128.14, 128.00, 127.98, 127.91, 127.73, 127.71, 127.66, 127.62, 127.58, 127.54, 127.48, 127.40, 127.16, 127.10, 127.02, 126.87, 126.73, 126.58, 126.12, 126.07, 125.90 (aromatic CH), 97.87 (C-1a), 96.94 (C-1b), 96.45, 96.32 (2 C-1), 82.19, 81.97, 81.85, 81.59 (4 C-3), 80.04, 79.79, 79.57, 79.42 (4 C-2), 77.67 (C-4), 75.52, 75.09, 74.56, 74.11, 74.05, 73.52, 73.41, 73.35, 73.31, 73.25 (CH<sub>2</sub>), 73.18, 73.14 (2 C-4), 73.06, 73.02, 72.87 (CH<sub>2</sub>), 72.53 (C-4), 70.99, 70.88, 70.81, 69.66 (4 C-5), 68.90, 68.84, 68.78, 68.15 (4 C-6), 55.26 (OCH<sub>3</sub>). HR-MS: Calculated for C<sub>120</sub>H<sub>124</sub>O<sub>21</sub> [M+H<sup>+</sup>]: 1901.8708; found: 1901.8695.

#### Synthesis of tetraglucoside **17**

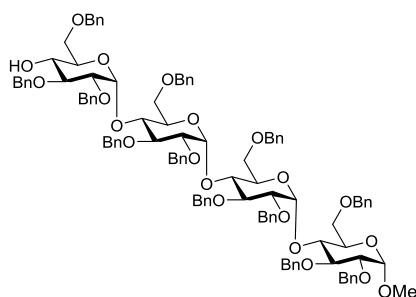

The reaction was carried out according to the general procedure D, using **16** (590 mg, 0.31 mmol, 0.05 M in DCM:H<sub>2</sub>O) and DDQ (80 mg, 0.35 mmol). The product was purified by silica gel column chromatography (PE:EA = 5:1). Compound **17** (460 mg, 84% yield, PE:EA = 4:1, *R<sub>f</sub>* = 0.18) was obtained as a colorless syrup. [α]<sub>D</sub><sup>20</sup> +59.2 (*c*=1, CHCl<sub>3</sub>). IR (neat, cm<sup>-1</sup>) ν 695, 733, 747, 764, 910, 1027, 1039, 1094, 1152, 1207, 1260, 1456, 2855, 3923, 3031. <sup>1</sup>H-NMR (CDCl<sub>3</sub>, 400 MHz) δ 7.29-7.10 (m, 60 H, aromatic H), 5.70 (d, *J* = 3.2 Hz, 1 H, H-1b), 5.61 (bd, 2 H, H-1c, H-1d), 5.05 (d, *J* = 11.6 Hz, 1 H, CHH), 4.94-4.78 (m, 5 H, 5 CHH), 4.73-4.37 (m, 18 H), 4.31 (d, *J* = 12.0 Hz, 1 H, CHH), 4.14-4.01 (m, 6 H), 3.90-3.86 (m, 4 H), 3.78-3.39 (m, 17 H). <sup>13</sup>C-APT (CDCl<sub>3</sub>, 100 MHz,) δ 139.19, 139.05, 138.98, 138.95, 138.54, 138.34, 138.24, 138.20, 138.12, 138.07, 138.04, 137.97 (aromatic C), 128.57, 128.55, 128.48, 128.40, 128.35, 128.33, 128.29, 128.05, 127.99, 127.85, 127.83, 127.79, 127.77, 127.75, 127.72, 127.70, 127.67, 127.61, 127.59, 127.52, 127.47, 127.23, 127.17, 127.12, 126.97, 126.92, 126.81, 126.73, 126.64 (aromatic CH), 97.97, 96.79, 96.56, 96.34 (4 C-1), 82.03, 81.91, 81.63, 81.50 (4 C-3), 80.14, 79.86, 79.50, 79.17 (4 C-2), 75.36, 74.65, 74.15, 73.69, 73.50, 73.45 (C-4), 73.41, 73.38, 73.33, 73.27 (C-4), 72.93, 72.90, 72.40, 71.72 (C-4), 70.95, 70.91, 70.50 (3 C-5), 69.95 (C-6), 69.77 (C-5), 68.97, 68.88 (3 C-6), 55.35 (OCH<sub>3</sub>). HR-MS: Calculated for C<sub>109</sub>H<sub>116</sub>O<sub>21</sub> [M+Na<sup>+</sup>]: 1783.7901; found: 1783.7969.



### Synthesis of pentaglycoside **18**

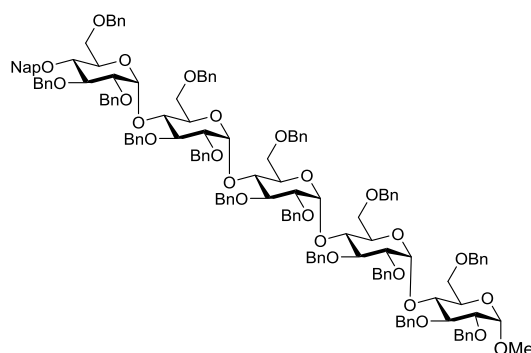

The reaction was carried out according to the standard procedure B. The donor **3b** (380 mg, 0.56 mmol, co-evaporated with toluene 3 times) was dissolved in dry DCM (2 mL) under nitrogen and stirred over fresh flame-dried molecular sieves 3A, after which DMF (700  $\mu$ L, 8.90 mmol) was added to the solution. The solution was cooled to  $-78\text{ }^{\circ}\text{C}$ , after which TfOH (49  $\mu$ L, 0.55 mmol) was added. After 30 min, the pre-activation was complete as indicated by TLC-analysis. Acceptor **15** (680 mg, 0.76 mmol, dissolved in a little DCM and washed 3 times with DCM, totally 3 mL) was added to the solution and the mixture was placed in an ice bath. The reaction was stirred at  $0\text{ }^{\circ}\text{C}$  until TLC-analysis showed complete conversion of the acceptor. The reaction was quenched with  $\text{Et}_3\text{N}$ , filtered and concentrated *in vacuo*. The product was purified by size exclusion (DCM:MeOH = 1:1). Compound **18** (410mg, 80% yield,  $\alpha:\beta > 20:1$ , PE:EA = 4:1,  $R_f = 0.26$ ) was obtained as a colorless syrup.  $[\alpha]_{\text{D}}^{20} +92.7$  ( $c=1$ ,  $\text{CHCl}_3$ ). IR (neat,  $\text{cm}^{-1}$ )  $\nu$ 695, 734, 820, 857, 910, 1027, 1037, 1094, 1154, 1207, 1363, 1453, 2862, 2927, 3031.  $^1\text{H-NMR}$  ( $\text{CDCl}_3$ , 400 MHz)  $\delta$  7.81-7.79 (m, 1 H, aromatic H), 7.74-7.69 (m, 2 H, aromatic H), 7.50 (bs, 1 H, aromatic H), 7.46-7.44 (m, 2 H, aromatic H), 7.29-7.04 (m, 76 H, aromatic H), 5.72 (bs, 1 H, H-1), 5.63 (bs, 1 H, H-1), 5.59 (bs, 2 H, 2 H-1), 5.04 (d,  $J = 11.6$  Hz, 1 H, CHH), 4.93-4.70 (m, 11 H, 11 CHH), 4.60-4.37 (m, 20 H), 4.22 (d,  $J = 12.0$  Hz, 1 H, CHH), 4.11-3.47 (m, 29 H), 3.38-3.35 (m, 4 H).  $^{13}\text{C-APT}$  ( $\text{CDCl}_3$ , 100 MHz)  $\delta$  139.14, 139.00, 138.95, 138.89, 138.44, 138.28, 138.27, 138.14, 138.08, 137.99, 137.94, 137.90, 136.06, 133.30, 133.00 (aromatic C), 128.52, 128.40, 128.33, 128.21, 128.17, 128.02, 128.00, 127.94, 127.81, 127.77, 127.74, 127.71, 127.65, 127.59, 127.53, 127.50, 127.42, 127.18, 127.13, 127.05, 126.91, 126.77, 126.66, 126.59, 126.57, 126.15, 126.10, 125.93 (aromatic CH), 97.91 (C-1a), 97.01, 96.52, 96.46, 96.34 (4 C-1), 82.24, 81.98, 81.89, 81.68 (5 C-3), 80.05, 79.75, 79.57, 79.49 (5 C-2), 77.69 (C-4), 75.54, 75.12, 74.60, 74.12, 74.06, 73.55, 73.45, 73.41, 73.33, 73.29 ( $\text{CH}_2$ ), 73.17 (2 C-4), 73.06 ( $\text{CH}_2$ ), 72.95 (C-4), 72.91, 72.85 ( $\text{CH}_2$ ), 72.50 (C-4), 71.02, 70.90, 70.85, 69.69 (5 C-5), 68.92, 68.86, 68.80, 68.73, 68.16 (5 C-6), 55.29 ( $\text{OCH}_3$ ). MALDI-TOF: Calculated for  $\text{C}_{147}\text{H}_{152}\text{O}_{26}$   $[\text{M}+\text{H}^+]$ : 2356.0; found: 2357.9.

### Synthesis of pentaglycoside **19**

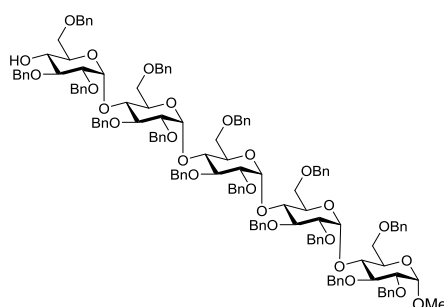

The reaction was carried out according to the general procedure D, using **18** (590 mg, 0.25 mmol, 0.05 M in DCM:H<sub>2</sub>O) and DDQ (63 mg, 0.28 mmol). The product was purified by silica gel column chromatography (PE:EA = 5:1). Compound **19** (415mg, 81% yield, PE:EA = 4:1, R<sub>f</sub> = 0.16) was obtained as a colorless syrup.  $[\alpha]_D^{20} +73.0$  (c=1, CHCl<sub>3</sub>). IR (neat, cm<sup>-1</sup>) v695, 733, 746, 763, 937, 1027, 1037, 1092, 1153, 1207, 1275, 1363, 1454, 2860, 2920, 3030, 3064. <sup>1</sup>H-NMR (CDCl<sub>3</sub>, 400 MHz) δ 7.31-7.02 (450m, 75 H, aromatic H), 5.71 (d, J = 3.6 Hz, 1 H, H-1), 5.64 (d, J = 3.6 Hz, 1 H, H-1), 5.60 (bd, 2 H, 2 H-1), 5.05 (d, J = 11.6 Hz, 1 H, CHH), 4.95-4.36 (m, 29 H), 4.30 (d, J = 12.0 Hz, 1 H, CHH), 4.13-3.98 (m, 8 H), 3.91-3.86 (m, 5 H), 3.80-3.50 (m, 15 H), 3.45-3.37 (m, 5 H). <sup>13</sup>C-NMR (CDCl<sub>3</sub>, 100 MHz) δ 139.56, 139.19, 139.03, 138.99, 138.95, 138.92, 138.50, 138.33, 138.20, 138.17, 138.11, 138.10, 138.00, 137.94 (aromatic C), 128.63, 128.53, 128.52, 128.45, 128.37, 128.31, 128.29, 128.27, 128.25, 128.22, 128.01, 127.96, 127.84, 127.80, 127.76, 127.30, 127.70, 127.69, 127.62, 127.55, 127.48, 127.44, 127.20, 127.15, 127.07, 126.94, 126.80, 126.69, 126.57 (aromatic CH), 97.95 (C-1a), 96.81, 96.55, 96.41, 96.36 (4 C-1), 81.99, 81.90, 81.68, 81.66, 81.50 (5 C-3), 80.10, 79.77, 79.58, 79.53, 79.13, 75.32, 74.62, 74.12, 74.04, 73.98, 73.66, 73.51, 73.46, 73.41, 73.37, 73.33, 73.22, 73.08, 73.02, 72.93, 72.91, 72.82, 72.35, 71.71, 70.93, 70.91, 70.46, 69.92, 69.74, 68.91, 68.77, 55.31 (OCH<sub>3</sub>). MALDI-TOF: Calculated for C<sub>136</sub>H<sub>144</sub>O<sub>26</sub> [M+Na<sup>+</sup>]: 2216.0; found: 2220.0.

#### Synthesis of hexaglucoide **20**

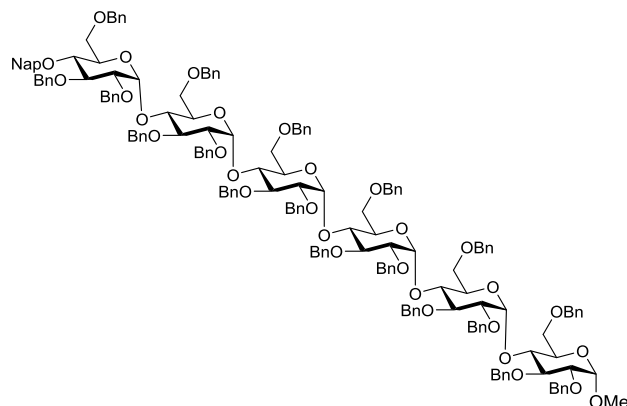

The reaction was carried out according to the standard procedure B. The donor **3b** (95 mg, 0.14 mmol, co-evaporated with toluene 3 times) was dissolved in dry DCM (1 mL) under nitrogen and stirred over fresh flame-dried molecular sieves 3A, after which DMF (175 μL, 2.25 mmol) was added to the solution. The solution was cooled to -78 °C, after which TfOH (12 μL, 0.14 mmol) was added. After 30 min, the pre-activation was complete as indicated by TLC-analysis. Acceptor **15** (680 mg, 0.76 mmol, dissolved in a little DCM and washed 3 times with DCM, totally 3 mL) was added to the solution and the mixture was placed in an ice bath. The reaction was stirred at 0 °C until TLC-analysis showed complete conversion of the acceptor. The reaction was quenched with Et<sub>3</sub>N, filtered and concentrated *in vacuo*. The product was purified by size exclusion (DCM:MeOH = 1:1). Compound **20** (104mg, 81% yield, α:β > 20:1, PE:EA = 4:1, R<sub>f</sub> = 0.21) was obtained as a colorless syrup.  $[\alpha]_D^{20} +72.6$  (c=1, CHCl<sub>3</sub>). IR (neat, cm<sup>-1</sup>) v696, 738, 749, 764, 1028, 1039, 1095, 1154, 1208, 1261, 1456, 2859, 2922, 3031. <sup>1</sup>H-NMR (CDCl<sub>3</sub>, 400 MHz) δ 7.82-7.79 (m, 1 H, aromatic H), 7.74-7.67 (m, 2 H, aromatic H), 7.50 (bs, 1 H, aromatic H), 7.47-7.43 (m, 2 H, aromatic H), 7.29-7.02 (m, 91 H, aromatic H), 5.71 (d, J = 3.6 Hz, 1 H, H-1), 5.64 (d, J = 3.2 Hz, 1 H, H-1), 5.61 (bt, 2 H, 2 H-1), 5.58 (d, J = 3.6 Hz, 1 H, H-1), 5.04 (d, J = 11.6 Hz, 1 H, CHH), 4.93-4.69 (m, 13

H, 11 CHH), 4.61-4.34 (m, 24 H), 4.21 (d,  $J = 12.0$  Hz, 1 H, CHH), 4.13-3.46 (m, 35 H), 3.38-3.35 (m, 4 H).  $^{13}\text{C}$ -APT ( $\text{CDCl}_3$ , 100 MHz,)  $\delta$  139.16, 138.98, 138.96, 138.91, 138.46, 138.30, 138.27, 138.16, 138.07, 138.00, 137.95, 137.92, 136.08, 133.32, 133.01 (aromatic C), 128.54, 128.41, 128.23, 128.19, 128.02, 127.97, 127.83, 127.80, 127.76, 127.73, 127.60, 127.58, 127.54, 127.50, 127.43, 127.21, 127.15, 127.06, 126.94, 126.79, 126.67, 126.64, 126.60, 126.58, 126.17, 126.11, 125.94 (aromatic CH), 97.93 (C-1a), 97.02, 96.55, 96.47, 96.34 (5 C-1), 82.25, 82.00, 81.92, 81.77, 81.73, 81.65 (6 C-3), 80.07, 79.77, 79.65, 79.58, 79.50, 77.71, 75.55, 75.13, 74.63, 74.07, 73.98, 73.56, 73.47, 73.37, 73.34, 73.30, 73.08, 72.99, 72.91, 72.63, 72.48, 71.02, 70.91, 70.85, 69.71, 68.88 (C-6), 68.72 (C-6), 68.18 (C-6), 55.31 ( $\text{OCH}_3$ ). MALDI-TOF: Calculated for  $\text{C}_{174}\text{H}_{180}\text{O}_{31}$  [ $\text{M}+\text{Na}^+$ ]: 2788.2; found: 2790.1.

#### Synthesis of hexaglucoide **21**

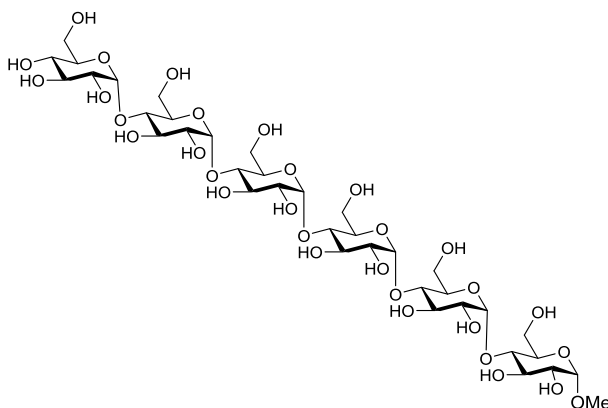

Compound **20** (31 mg, 0.011 mmol) was dissolved in THF/ $\text{H}_2\text{O}$ /*tert*-BuOH (4 ml/4 ml/1.6 ml) before a catalytic amount of  $\text{Pd}(\text{OH})_2/\text{C}$  was added. The reaction mixture was stirred for 3 days under a  $\text{H}_2$  atmosphere (3.5 bar), filtered and concentrated *in vacuo*. A white powder was obtained, which was purified by gel filtration (HW-40, 0.15M  $\text{NH}_4\text{OAc}$  in  $\text{H}_2\text{O}$ ) to provide **21** (9mg, 80%).  $^1\text{H}$ -NMR ( $\text{CDCl}_3$ , 400 MHz)  $\delta$  5.37-5.36 (m, 5 H, 5 H-1), 4.77 (d,  $J = 4.0$  Hz, 1 H, H-1a), 3.94-3.53 (m, 35 H), 3.41-3.35 (m, 4 H).  $^{13}\text{C}$ -APT ( $\text{CDCl}_3$ , 100 MHz,)  $\delta$  96.68, 96.53, 99.40, 99.07 (6 C-1), 76.71, 76.64, 76.55, 73.50, 73.29, 72.81, 72.66, 71.68, 71.50, 71.12, 71.01, 70.00, 69.26, 60.41 (C-6), 60.34 (C-6), 55.04 ( $\text{OCH}_3$ ). HR-MS: Calculated for  $\text{C}_{37}\text{H}_{64}\text{O}_{31}$  [ $\text{M}+\text{Na}^+$ ]: 1027.3324; found: 1027.3348.

#### Synthesis of diglucoide **23** using NIS/TMSOTf+DMF

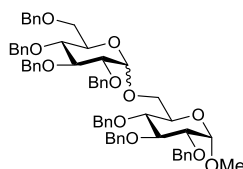

The donor **2a** (102 mg, 0.16 mmol, co-evaporated with toluene 3 times) was dissolved in dry DCM (1 mL) under nitrogen and stirred over fresh flame-dried molecular sieves 3A, after which DMF (202  $\mu\text{L}$ , 2.56 mmol) was added to the solution. The solution was cooled to 0  $^\circ\text{C}$ , after which NIS (36 mg, 0.16 mmol) and TMSOTf (29  $\mu\text{L}$ , 0.16 mmol) were added. After 30 min, the pre-activation was complete as indicated by TLC-analysis. Acceptor **22** (50 mg, 0.11 mmol, dissolved in a little DCM and washed 2 times with DCM (totally 1 mL) was added to the solution. The reaction was

stirred at 0 °C until TLC-analysis showed complete conversion of the acceptor. The reaction was quenched with saturated Na<sub>2</sub>S<sub>2</sub>O<sub>3</sub>, then the organic layer was washed with water and brine, dried with anhydrous MgSO<sub>4</sub>, filtered and concentrated *in vacuo*. The crude product was purified by size exclusion (DCM:MeOH = 1:1). Compound **23** (88 mg, 83% yield,  $\alpha:\beta = 2.7:1$ , PE:EA = 4:1, *R<sub>f</sub>* = 0.32) was obtained as a colorless syrup.

Synthesis of diglucoside **24** ( $\alpha:\beta = 3:1$ )

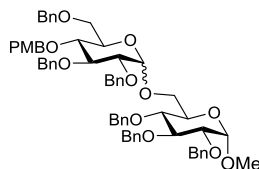

The donor **4b** (123 mg, 0.16 mmol) and acceptor **22** (70 mg, 0.15 mmol, co-evaporated with toluene 3 times) was dissolved in dry DCM (2 mL) under nitrogen and stirred over fresh flame-dried molecular sieves 3A, after which DMF (50  $\mu$ L, 0.64 mmol) was added to the solution. Then TMSOTf (10  $\mu$ L, 0.05 mmol) was added. The reaction was stirred at rt until TLC-analysis showed complete conversion of the acceptor. The reaction was quenched with Et<sub>3</sub>N, filtered and concentrated *in vacuo*. The product was purified by size exclusion (DCM:MeOH = 1:1). Compound **24** (144 mg, 94% yield,  $\alpha:\beta = 3:1$ ) was obtained as a white solid.

Synthesis of diglucoside **24**

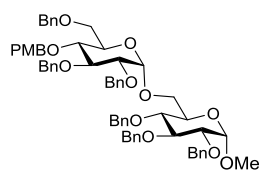

The reaction was carried out according to the standard procedure C, using **4b** (90 mg, 0.15 mmol), **22** (40 mg, 0.09 mmol, 0.1 M in DCM), Ph<sub>3</sub>P=O (143 mg, 0.51 mmol) and TMSI (19  $\mu$ L, 0.12 mmol). The product was purified by size exclusion (DCM:MeOH = 1:1). Compound **24** (79 mg, 90% yield,  $\alpha:\beta = 25:1$ , PE:EA = 4:1, *R<sub>f</sub>* = 0.34, melting point 117.5-118.6 °C) was obtained as a white solid. IR (neat, cm<sup>-1</sup>)  $\nu$ 696, 737, 747, 821, 1028, 1052, 1072, 1084, 1137, 1159, 1249, 1363, 1456, 1515, 1855, 2924, 3030. <sup>1</sup>H-NMR (CDCl<sub>3</sub>, 400 MHz)  $\delta$  7.33-7.22 (m, 30 H, aromatic *H*), 7.04-7.01 (m, 2 H, aromatic *H*), 6.79-6.76 (m, 2 H, aromatic *H*), 4.99-4.89 (m, 4 H, 3 *CHH*, H-1), 4.82-4.54 (m, 10 H, 10 *CHH*), 4.43-4.37 (m, 2 H, *CHH*, H-1), 4.00-3.92 (m, 2 H), 3.84-3.52 (m, 12 H), 3.43 (dd, *J*<sub>1</sub> = 3.6 Hz, *J*<sub>2</sub> = 9.6 Hz, 1 H), 3.34 (s, 3 H). <sup>13</sup>C-APT (CDCl<sub>3</sub>, 100 MHz)  $\delta$  159.22, 138.98, 138.93, 138.55, 138.27, 138.10, 130.72 (aromatic C), 129.54, 128.51, 128.46, 128.25, 128.11, 128.07, 128.00, 127.95, 127.87, 127.74, 127.72, 127.67, 127.59, 113.78 (aromatic CH), 98.04 (C-1), 97.35 (C-1), 82.22, 81.80, 80.22, 80.07, 77.85, 77.42, 75.81, 75.57, 75.08, 74.68, 73.49, 73.48, 72.45, 70.47, 70.35, 68.56, 66.10, 55.35, 55.25. HR-MS: Calculated for C<sub>63</sub>H<sub>68</sub>O<sub>12</sub>[M+Na<sup>+</sup>]: 1039.4603; found: 1039.4642.

Synthesis of glucoside **27** ( $\alpha:\beta = 1:1$ )

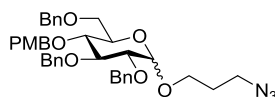

The donor **4b** (123 mg, 0.16 mmol) and 3-aminopropanol (30  $\mu$ L, 0.32 mmol, co-evaporated with toluene 3 times) was dissolved in dry DCM (2 mL) under nitrogen and stirred over fresh flame-dried molecular sieves 3A. Then TMSOTf (5  $\mu$ L, 0.03 mmol) was added. The reaction was quenched with Et<sub>3</sub>N after 3 h, filtered and concentrated *in vacuo*. The product was purified by silica gel column chromatography (PE:EA = 10:1). Compound **27** (53 mg, 49% yield,  $\alpha$ : $\beta$  = 1:1) was obtained as a colorless syrup.

#### Synthesis of glucoside **27**

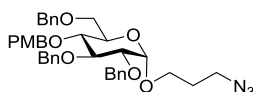

The reaction was carried out according to the standard procedure C, using **4b** (1.95 g, 2.63 mmol, 0.1 M in DCM), 3-aminopropanol (369  $\mu$ L, 3.94 mmol), Ph<sub>3</sub>P=O (4.39 g, 15.8 mmol) and TMSI (413  $\mu$ L, 2.89 mmol). The product was purified by silica gel column chromatography (PE:EA = 10:1). Compound **27** (1530 mg, 91% yield,  $\alpha$ : $\beta$  = 11:1, PE:EA = 4:1, R<sub>f</sub> = 0.48) was obtained as a colorless syrup. An analytical sample of the pure  $\alpha$ -anomer was obtained by careful silica gel column chromatography (PE:EA = 10:1).  $[\alpha]_D^{20}$  +24.6 (c=1, CHCl<sub>3</sub>). IR (neat, cm<sup>-1</sup>) v697, 749, 764, 823, 1014, 1028, 1040, 1071, 1158, 1249, 1257, 1456, 2096, 2867, 2910, 2923, 3031. <sup>1</sup>H-NMR (CDCl<sub>3</sub>, 400 MHz)  $\delta$  7.33-7.22 (m, 15 H, aromatic H), 7.03 (d, J = 8.6 Hz, 2 H, aromatic H), 6.78 (d, J = 8.6 Hz, 2 H, aromatic H), 4.98 (d, J = 11.0 Hz, 1 H, CHH), 4.83 (d, J = 11.0 Hz, 1 H, CHH), 4.79-4.72 (m, 3 H, 2 CHH, H-1), 4.63 (d, J = 12.0 Hz, 1 H, CHH), 4.61 (d, J = 12.0 Hz, 1 H, CHH), 4.47 (d, J = 12.0 Hz, 1 H, CHH), 4.39 (d, J = 12.0 Hz, 1 H, CHH), 3.94 (t, J<sub>1</sub> = J<sub>2</sub> = 9.2 Hz, 1 H, H-3), 3.76 (s, 3 H, CH<sub>3</sub>), 3.74-3.68 (m, 3H, H-5, H-6a, H-1<sup>a</sup>), 3.64-3.59 (m, 2H, H-6b, H-4), 3.55 (dd, J<sub>1</sub> = 3.6 Hz, J<sub>2</sub> = 9.6 Hz, 1 H, H-2), 3.48-3.33 (m, 3 H, H-1<sup>b</sup>, H-3<sup>o</sup>), 1.95-1.77 (m, 2 H, H-2<sup>o</sup>). <sup>13</sup>C-APT (CDCl<sub>3</sub>, 100 MHz,)  $\delta$  159.33, 138.96, 138.32, 137.99, 130.39 (5 aromatic C), 129.73, 128.55, 128.48, 128.46, 128.09, 128.01, 127.99, 127.94, 127.79, 127.66, 113.86 (19 aromatic CH), 97.30 (C-1), 82.12 (C-3), 80.13 (C-2), 77.41 (C-4), 75.74, 74.85, 73.55, 73.38 (4 PhCH<sub>2</sub>), 70.41 (C-5), 68.49 (C-6), 64.79 (C-1<sup>o</sup>), 55.33 (OCH<sub>3</sub>), 48.38 (C-3<sup>o</sup>), 28.93 (C-2<sup>o</sup>). HR-MS: Calculated for C<sub>38</sub>H<sub>43</sub>O<sub>7</sub>N<sub>3</sub>[M+Na<sup>+</sup>]: 676.2993; found: 676.3008.

#### Synthesis of glucoside **28**

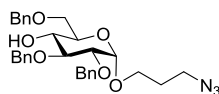

The reaction was carried out according to the general procedure E, using **27** (1605 mg, 2.51 mmol, 0.1 M in DCM:HFIP), triethylsilane (400  $\mu$ L, 2.52 mmol) and 0.2M HCl/HFIP (1.3 ml, 0.26 mmol). The product was purified by silica gel column chromatography (PE:EA = 6:1). Compound **28** (1138 mg, 85% yield, PE:EA = 2:1, R<sub>f</sub> = 0.49) was obtained as a colorless syrup.  $[\alpha]_D^{20}$  +30.0 (c=1, CHCl<sub>3</sub>). IR (neat, cm<sup>-1</sup>) v697, 749, 764, 1000, 1028, 1053, 1080, 1152, 1261, 1275, 1456, 2096, 2874, 2916, 3032. <sup>1</sup>H-NMR (CDCl<sub>3</sub>, 400 MHz)  $\delta$  7.33-7.21 (m, 15 H, aromatic H), 4.99 (d, J = 11.4 Hz, 1 H, CHH), 4.76-4.71 (m, 3 H, 2 CHH, H-1), 4.61 (d, J = 12.0 Hz, 1 H, CHH), 4.58 (d, J = 12.0 Hz, 1 H, CHH), 4.52 (d, J = 12.0 Hz, 1 H, CHH), 3.81-3.66 (m, 5 H, H-6, H-5, H-1<sup>a</sup>), 3.60 (dt, J<sub>1</sub> = 2.2 Hz, J<sub>2</sub> = 9.2 Hz, 1 H, H-4), 3.52 (dd, J<sub>1</sub> = 3.6 Hz, J<sub>2</sub> = 9.6 Hz, 1 H, H-2), 3.47-3.33 (m, 3 H, H-1<sup>b</sup>, H-3<sup>o</sup>), 2.46 (d, J = 2.2 Hz, 1 H, OH), 1.94-1.82 (m, 2 H, H-2<sup>o</sup>). <sup>13</sup>C-APT (CDCl<sub>3</sub>, 100 MHz,)  $\delta$  138.85, 138.18, 138.02 (3 aromatic

C), 128.59, 128.52, 128.04, 128.02, 127.98, 127.94, 127.84, 127.68, 127.64 (15 aromatic CH), 97.21 (C-1), 82.42 (C-3), 79.80 (C-2), 75.39, 73.59, 73.07 (3 PhCH<sub>2</sub>), 70.77 (C-4), 70.20 (C-5), 69.49 (C-6), 64.78 (C-1°), 48.35 (C-3°), 28.86 (C-2°). HR-MS: Calculated for C<sub>30</sub>H<sub>35</sub>O<sub>6</sub>N<sub>3</sub> [M+Na<sup>+</sup>]: 556.2418; found: 556.2771.

#### Characterization of anhydroglucose **29**

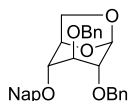

Compound **29** was obtained in the glycosylation reaction of **5b** and **28** as a side product. Compound **29** was obtained as a colorless syrup.  $[\alpha]_D^{20}$  -21.1 (c=1, CHCl<sub>3</sub>). IR (neat, cm<sup>-1</sup>) ν 697, 736, 819, 857, 898, 925, 953, 1027, 1071, 1089, 1173, 1197, 1315, 1337, 1454, 1718, 2858, 2895, 2922, 2956, 3060. <sup>1</sup>H-NMR (CDCl<sub>3</sub>, 400 MHz) δ 7.85-7.78 (m, 3 H, aromatic H), 7.74 (s, 1 H, aromatic H), 7.51-7.46 (m, 3 H, aromatic H), 7.33-7.27 (m, 8 H, aromatic H), 7.20-7.17 (m, 2 H, aromatic H), 5.47 (s, 1 H, H-1), 4.47 (d, *J* = 12.4 Hz, 1 H, CHH), 4.71 (d, *J* = 12.4 Hz, 1 H, CHH), 4.62 (d, *J* = 5.4 Hz, 1 H, H-5), 4.58 (d, *J* = 12.4 Hz, 1 H, CHH), 4.54 (d, *J* = 12.4 Hz, 1 H, CHH), 4.42 (d, *J* = 12.4 Hz, 1 H, CHH), 4.37 (d, *J* = 12.4 Hz, 1 H, CHH), 3.89 (dd, *J*<sub>1</sub> = 0.8 Hz, *J*<sub>2</sub> = 7.2 Hz, 1 H, H-6a), 3.62 (dd, *J*<sub>1</sub> = 5.4 Hz, *J*<sub>2</sub> = 7.2 Hz, 1 H, H-6b), 3.61 (bs, 1 H, H-3), 3.36 (bd, 2 H, H-4, H-2). <sup>13</sup>C-APT (CDCl<sub>3</sub>, 100 MHz,) δ 137.93, 135.47, 133.27, 133.16 (aromatic C), 128.56, 128.55, 128.45, 128.09, 127.98, 127.96, 127.94, 127.83, 127.71, 126.78, 126.35, 126.15, 125.92 (aromatic CH), 100.69 (C-1), 76.71 (C-4), 76.06 (C-3), 776.04 (C-2), 74.51 (C-5), 72.08, 71.90, 71.47 (3 CH<sub>2</sub>), 65.469 (C-6). HR-MS: Calculated for C<sub>31</sub>H<sub>30</sub>O<sub>5</sub> [M+Na<sup>+</sup>]: 505.1985; found: 505.1999.

#### Synthesis of diglucoside **30**

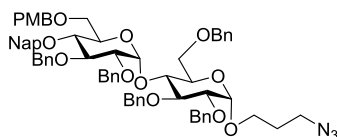

The reaction was carried out according to the standard procedure B. The donor **5b** (2.60 g, 3.28 mmol, co-evaporated with toluene 3 times) was dissolved in dry DCM (35 mL) under nitrogen and stirred over fresh flame-dried molecular sieves 3A, after which DMF (2.80 mL, 35.5 mmol) was added to the solution. The solution was cooled to -78 °C, after which TMSOTf (600 μL, 3.35 mmol) was added. After 60 min, the pre-activation was complete as indicated by TLC-analysis. Acceptor **28** (1.19 g, 2.23 mmol, dissolved in a little DCM and washed 3 times with DCM, totally 10 mL) was added to the solution and the mixture was placed in an ice bath. The reaction was stirred at 0 °C until TLC-analysis showed complete conversion of the acceptor. The reaction was quenched with Et<sub>3</sub>N, filtered and concentrated *in vacuo*. The product was purified by size exclusion (DCM:MeOH = 1:1). Compound **30** (2.05 g, 81% yield, α:β > 20:1, Toluene (Tol):EA = 12:1, R<sub>f</sub> = 0.55) was obtained as a colorless syrup.  $[\alpha]_D^{20}$  +44.5 (c=1, CHCl<sub>3</sub>). IR (neat, cm<sup>-1</sup>) ν 697, 750, 764, 1014, 1029, 1038, 1093, 1156, 1261, 2096, 2868, 2925. <sup>1</sup>H-NMR (CDCl<sub>3</sub>, 400 MHz) δ 7.81-7.78 (m, 1 H, aromatic H), 7.73-7.68 (m, 2 H, aromatic H), 7.47-7.42 (m, 3 H, aromatic H), 7.29-7.10 (m, 28 H, aromatic H), 6.76-6.72 (m, 2 H, aromatic H), 5.73 (d, *J* = 3.6 Hz, 1 H, H-1b), 5.05 (d, *J* = 11.6 Hz, 1 H, CHH), 4.92 (d, *J* = 10.8 Hz, 1 H, CHH), 4.88 (d, *J* = 11.2 Hz, 1 H, CHH), 4.83 (d, *J* = 11.6 Hz, 1 H, CHH), 4.81 (d, *J* = 11.2 Hz, 1 H, CHH), 4.74 (d, *J* = 3.6 Hz, 1 H, H-1a), 4.67 (d, *J* = 12.0 Hz, 1 H, CHH),

4.61-4.46 (m, 7 H, 7 CHH), 4.16 (d,  $J = 12.0$  Hz, 1 H, CHH), 4.11-4.05 (m, 2 H, H-3a, H-4a), 3.93 (t,  $J = 8.8$  Hz, 1 H, H-3b), 3.86-3.82 (m, 2 H, H-5a, H-6a<sub>a</sub>), 3.76-3.61 (m, 8H, H-5b, H-4b, H-2a, H-1°<sub>a</sub>, H-6a<sub>b</sub>, OCH<sub>3</sub>), 3.55-3.49 (m, 2H, H-2b, H-6b<sub>a</sub>), 3.48-3.34 (m, 4 H, H-1°<sub>b</sub>, H-6b<sub>b</sub>, H-3°), 1.92-1.85 (m, 2 H, H-2°). <sup>13</sup>C-APT (CDCl<sub>3</sub>, 100 MHz,) δ 159.25, 139.02, 138.89, 138.23, 138.11, 137.98, 135.99, 133.26, 132.96 (aromatic C), 129.91 (aromatic CH), 129.88 (aromatic C), 128.52, 128.40, 128.36, 128.32, 128.29, 128.15, 128.00, 127.94, 127.93, 127.87, 127.80, 127.68, 127.55, 127.44, 127.27, 127.17, 126.79, 126.47, 126.04, 125.88, 113.72 (aromatic CH), 96.88 (C-1a), 96.84 (C-1b), 82.09 (C-3b), 81.97 (C-3a), 80.48 (C-2a), 79.42 (C-2b), 77.63 (C-4b), 75.59, 75.03, 74.36, 73.30, 73.25, 73.18, 73.07 (7 CH<sub>2</sub>), 72.34 (C-4a), 71.01 (C-5b), 69.84 (C-5a), 69.02 (C-6a), 67.52 (C-6b), 64.86 (C-1°), 55.12 (OCH<sub>3</sub>), 48.36 (C-3°), 28.90 (C-2°). HR-MS: Calculated for C<sub>69</sub>H<sub>73</sub>O<sub>12</sub>N<sub>3</sub>[M+Na<sup>+</sup>]: 1158.5086; found: 1158.5112.

### Synthesis of diglucoside **31**

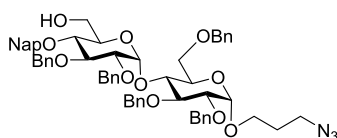

The reaction was carried out according to the general procedure E, using **30** (1.78 g, 1.57 mmol, 0.1 M in DCM:HFIP), triethylsilane (250 μL, 1.57 mmol) and 0.2M HCl/HFIP (0.8 ml, 0.16mmol). The product was purified by silica gel column chromatography (Tol:EA = 20:1). Compound **31** (1.36 g, 85% yield, Tol:EA = 12:1,  $R_f = 0.21$ ) was obtained as a colorless syrup.  $[\alpha]_D^{20} +30.4$  (c=1, CHCl<sub>3</sub>). IR (neat, cm<sup>-1</sup>) ν 696, 735, 748, 818, 1027, 1047, 1072, 1089, 1155, 1208, 1261, 1275, 1355, 1363, 1456, 2096, 2862, 2871, 2918, 2924, 3031. <sup>1</sup>H-NMR (CDCl<sub>3</sub>, 400 MHz) δ 7.82-7.74 (m, 3 H, aromatic H), 7.68 (bs, 1 H, aromatic H), 7.48-7.43 (m, 2 H, aromatic H), 7.39 (dd,  $J_1 = 1.6$  Hz,  $J_2 = 8.4$  Hz, 1 H, aromatic H), 7.30-7.19 (m, 25 H, aromatic H), 5.63 (d,  $J = 3.6$  Hz, 1 H, H-1b), 5.04 (d,  $J = 11.2$  Hz, 1 H, CHH), 5.00 (d,  $J = 10.8$  Hz, 1 H, CHH), 4.93 (d,  $J = 10.8$  Hz, 1 H, CHH), 4.82 (d,  $J = 10.8$  Hz, 1 H, CHH), 4.80 (d,  $J = 10.8$  Hz, 1 H, CHH), 4.77 (d,  $J = 11.2$  Hz, 1 H, CHH), 4.74 (d,  $J = 3.6$  Hz, 1 H, H-1a), 4.68 (d,  $J = 12.0$  Hz, 1 H, CHH), 4.61-4.50 (m, 5 H, 5 CHH), 4.09-4.04 (m, 2 H, H-3a, H-4a), 3.96 (t,  $J = 8.8$  Hz, 1 H, H-3b), 3.86-3.82 (bd, 2 H, H-5a, H-6a<sub>a</sub>), 3.76-3.51 (m, 7H, H-6b, H-5b, H-4b, H-6a<sub>b</sub>, H-2a, H-1°<sub>a</sub>), 3.48-3.37 (m, 4 H, H-2b, H-1°<sub>b</sub>, H-3°), 1.93-1.87 (m, 2 H, H-2°). <sup>13</sup>C-APT (CDCl<sub>3</sub>, 100 MHz,) δ 139.01, 138.79, 138.10, 137.99, 137.95, 135.77, 133.32, 133.07 (aromatic C), 128.58, 128.48, 128.47, 128.40, 128.38, 128.28, 128.19, 128.08, 128.01, 127.94, 127.86, 127.83, 127.80, 127.67, 126.85, 126.71, 126.23, 126.12, 126.07 (aromatic CH), 96.90 (C-1a), 96.53 (C-1b), 82.00 (C-3a), 81.85 (C-3b), 80.41 (C-2a), 79.60 (C-2b), 77.59 (C-4b), 75.64, 75.31, 74.40, 73.50, 73.35 (6 CH<sub>2</sub>), 72.31 (C-4a), 71.71 (C-5b), 69.91 (C-5a), 68.70 (C-6a), 64.94 (C-1°), 64.68 (C-6b), 48.41 (C-3°), 28.93 (C-2°). HR-MS: Calculated for C<sub>62</sub>H<sub>67</sub>O<sub>11</sub>N<sub>3</sub> [M+Na<sup>+</sup>]: 1038.4511; found: 1038.4543.

### Synthesis of triglucoside **32**

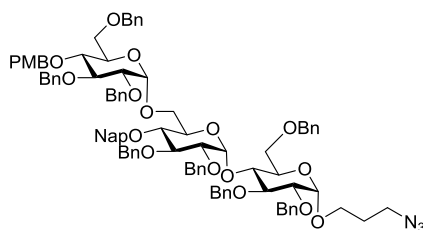

The reaction was carried out according to the standard procedure C, using **4b** (1.80 g, 2.43 mmol), **31** (1.28 g, 1.26 mmol, 0.1 M in DCM),  $\text{Ph}_3\text{P}=\text{O}$  (4.00g, 14.4 mmol) and TMSI (382  $\mu\text{L}$ , 2.67 mmol). The product was purified by size exclusion (DCM:MeOH = 1:1). Compound **32** (1.34 g, 68% yield,  $\alpha:\beta > 20:1$ , Tol:EA = 12:1,  $R_f = 0.52$ ) was obtained as a colorless syrup.  $[\alpha]_{\text{D}}^{20} +58.1$  ( $c=1$ ,  $\text{CHCl}_3$ ). IR (neat,  $\text{cm}^{-1}$ )  $\nu$ 697, 749, 764, 820, 1028, 1051, 1073, 1084, 1156, 1208, 1251, 1261, 1275, 1465, 2096, 2868, 2923, 3031.  $^1\text{H-NMR}$  ( $\text{CDCl}_3$ , 400 MHz)  $\delta$  7.78-7.68 (m, 4 H, aromatic *H*), 7.46-7.37 (m, 3 H, aromatic *H*), 7.32-7.10 (m, 40 H, aromatic *H*), 7.01 (bd, 2 H, aromatic *H*), 6.75-6.72 (m, 2 H, aromatic *H*), 5.63 (d,  $J = 3.6$  Hz, 1 H, H-1b), 5.07 (d,  $J = 3.6$  Hz, 1 H, H-1c), 5.03 (d,  $J = 12.0$  Hz, 1 H, CHH), 5.02 (d,  $J = 11.6$  Hz, 1 H, CHH), 4.93 (d,  $J = 10.8$  Hz, 1 H, CHH), 4.88 (d,  $J = 10.8$  Hz, 1 H, CHH), 4.80-4.72 (m, 6 H, H-1a, 5 CHH), 4.65-4.46 (m, 7 H, 7 CHH), 4.41-4.34 (m, 4 H, 4 CHH), 4.07-4.03 (m, 2 H, H-4a, H-3a), 3.96-3.56 (m, 17 H), 3.53 (dd,  $J_1 = 3.2$  Hz,  $J_2 = 9.6$  Hz, 1 H, H-2c), 3.48-3.37 (m, 4 H, H-6c, H-3°), 3.26 (dd,  $J_1 = 3.6$  Hz,  $J_2 = 9.6$  Hz, 1 H, H-2b), 1.91-1.85 (m, 2 H, H-2°).  $^{13}\text{C-APT}$  ( $\text{CDCl}_3$ , 100 MHz)  $\delta$  159.20, 134.14, 139.03, 138.96, 138.54, 138.17, 138.13, 138.11, 138.03, 136.20, 133.36, 133.01, 130.77 (aromatic C), 129.62, 128.57, 128.45, 128.39, 128.36, 128.33, 128.22, 128.15, 128.05, 128.04, 127.80, 127.75, 127.70, 127.55, 127.50, 127.47, 127.38, 127.21, 126.61, 126.53, 126.15, 126.08, 125.87, 113.76 (aromatic CH), 97.20 (C-1c), 96.90 (C-1a), 96.29 (C-1b), 82.12 (C-3a), 81.98 (C-3b), 81.81 (C-3c), 80.38 (C-2a), 80.21 (C-2c), 80.00 (C-2b), 77.65 (C-4b), 77.31 (C-4c), 75.58, 75.50, 75.22, 74.77, 74.09, 73.54, 73.34, 73.29 ( $\text{CH}_2$ ), 71.94 (C-4a), 71.84 ( $\text{CH}_2$ ), 71.70 (C-5b), 70.27 (C-5c), 69.79 (C-5a), 69.14 (C-6a), 68.39 (C-6c), 65.24 (C-6b), 64.91 (C-1°), 55.33 ( $\text{OCH}_3$ ), 48.41 (C-3°), 28.93 (C-2°). HR-MS: Calculated for  $\text{C}_{62}\text{H}_{67}\text{O}_{11}\text{N}_3$  [ $\text{M}+\text{Na}^+$ ]: 1591.7162; found: 1591.6997.

### Synthesis of triglucoside **33**

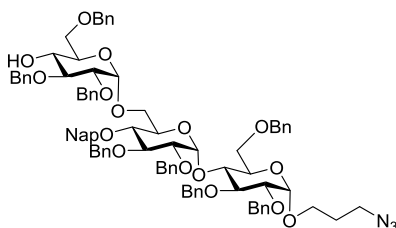

The reaction was carried out according to the general procedure E, using **30** (1.90 g, 1.21 mmol, 0.1 M in DCM:HFIP), triethylsilane (302  $\mu\text{L}$ , 1.90 mmol) and 0.2M HCl/HFIP (0.95 ml, 0.19 mmol). The product was purified by silica gel column chromatography (Tol:EA = 25:1). Compound **33** (1456mg, 83% yield, Tol:EA = 12:1,  $R_f = 0.33$ ) was obtained as a colorless syrup.  $[\alpha]_{\text{D}}^{20} +47.7$  ( $c=1$ ,  $\text{CHCl}_3$ ). IR (neat,  $\text{cm}^{-1}$ )  $\nu$ 696, 737, 749, 764, 820, 857, 911, 1027, 1051, 1081, 1091, 1141, 1155, 1208, 1261, 1275, 2097, 2867, 2923.  $^1\text{H-NMR}$  ( $\text{CDCl}_3$ , 400 MHz)  $\delta$  7.82-7.70 (m, 4 H, aromatic *H*), 7.49-7.39 (m, 3 H, aromatic *H*), 7.31-7.12 (m, 40 H, aromatic *H*), 5.64 (d,  $J = 3.6$  Hz, 1 H, H-1b), 5.06-5.03 (m, 3 H, H-1c, 2 CHH), 4.94 (d,  $J = 11.6$  Hz, 1 H, CHH), 4.89 (d,  $J = 10.8$  Hz, 1 H, CHH),



4.81-4.35 (m, 15 H, H-1a, 14 CHH), 4.09-4.03 (m, 2 H, H-4a, H-3a), 3.93-3.32 (m, 19 H), 3.26 (dd,  $J_1 = 3.6$  Hz,  $J_2 = 10.0$  Hz, 1 H, H-2b), 1.91-1.85 (m, 2 H, H-2°).  $^{13}\text{C}$ -APT (CDCl<sub>3</sub>, 100 MHz,)  $\delta$  139.04, 138.92, 138.42, 134.14, 138.09, 137.99, 136.15, 133.35, 133.02 (aromatic C), 128.55, 128.45, 128.40, 128.36, 128.32, 128.20, 128.17, 128.10, 128.05, 128.01, 127.82, 127.79, 127.69, 127.58, 127.53, 127.46, 127.38, 127.32, 127.23, 126.65, 126.59, 126.14, 125.93 (aromatic CH), 97.17 (C-1c), 96.85 (C-1a), 96.16 (C-1b), 82.15 (C-3a), 81.99 (C-3b), 80.86 (C-3c), 80.39 (C-2a), 80.01 (C-2b), 79.76 (C-2c), 77.71 (C-4b), 77.48, 77.16, 76.84, 75.52, 75.17, 74.12, 73.58, 73.33, 73.28 (CH<sub>2</sub>), 71.69 (C-4a), 71.65 (C-5b), 71.58 (CH<sub>2</sub>), 70.62 (C-5c), 70.70 (C-4c), 69.75 (C-5a), 69.36 (C-6a), 69.07 (C-6c), 65.34 (C-6b), 64.90 (C-1°), 48.38 (C-3°), 28.90 (C-2°). HR-MS: Calculated for C<sub>62</sub>H<sub>67</sub>O<sub>11</sub>N<sub>3</sub> [M+H<sup>+</sup>]: 1448.6629; found: 1448.6653.

### Synthesis of tetraglucose **34**

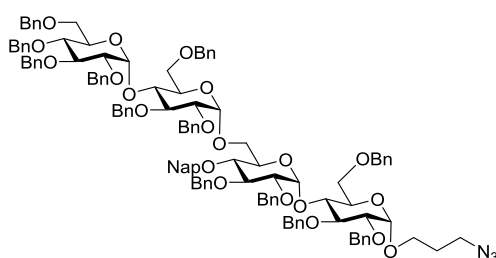

The reaction was carried out according to the standard procedure B. The donor **2b** (1.05 g, 1.47 mmol, co-evaporated with toluene 3 times) was dissolved in dry DCM (10 mL) under nitrogen and stirred over fresh flame-dried molecular sieves 3A, after which DMF (1.86 mL, 23.6 mmol) was added to the solution. The solution was cooled to -78 °C, after which TfOH (130  $\mu\text{L}$ , 1.47 mmol) was added. After 30 min, the pre-activation was complete as indicated by TLC-analysis. Acceptor **33** (1.07 g, 0.74 mmol, dissolved in a little DCM and washed 3 times with DCM, totally 5 mL) was added to the solution and the mixture was placed in an ice bath. The reaction was stirred at 0 °C until TLC-analysis showed complete conversion of the acceptor. The reaction was quenched with Et<sub>3</sub>N, filtered and concentrated *in vacuo*. The product was purified by size exclusion (DCM:MeOH = 1:1). Compound **34** (1.18 g, 81% yield,  $\alpha:\beta > 20:1$ , Tol:EA = 12:1,  $R_f = 0.57$ ) was obtained as a colorless syrup.  $[\alpha]_D^{20} +60.7$  (c=1, CHCl<sub>3</sub>). IR (neat, cm<sup>-1</sup>)  $\nu$  696, 734, 749, 764, 819, 856, 909, 1027, 1047, 1072, 1091, 1155, 1207, 1261, 1275, 1363, 1456, 2090, 2095, 2863, 2923, 3031.  $^1\text{H}$ -NMR (CDCl<sub>3</sub>, 400MHz)  $\delta$  7.78-7.73 (m, 4 H, aromatic H), 7.48-7.37 (m, 3 H, aromatic H), 7.28-7.03 (m, 60 H, aromatic H), 5.73 (d,  $J = 3.6$  Hz, 1 H, H-1d), 5.64 (d,  $J = 3.6$  Hz, 1 H, H-1b), 5.20 (d,  $J = 3.6$  Hz, 1 H, H-1c), 5.08-5.00 (m, 3 H, 3 CHH), 4.90-4.29 (m, 23 H, H-1a, 22 CHH), 4.22 (d,  $J = 12.4$  Hz, 1 H, CHH), 4.11-4.03 (m, 4 H, H-5b, H-4c, H-3a, H-3c), 3.95-3.31 (m, 23 H), 3.23 (dd,  $J_1 = 3.6$  Hz,  $J_2 = 9.2$  Hz, 1 H, H-2b), 1.91-1.85 (m, 2 H, H-2°).  $^{13}\text{C}$ -APT (CDCl<sub>3</sub>, 100 MHz,)  $\delta$  139.05, 139.04, 139.02, 138.85, 138.64, 138.38, 138.21, 138.07, 138.04, 138.01, 137.98, 136.24, 133.38, 133.05 (aromatic C), 128.57, 128.41, 128.35, 128.32, 128.31, 128.26, 128.21, 128.12, 128.06, 128.03, 127.93, 127.80, 127.76, 127.68, 127.63, 127.50, 127.46, 127.34, 127.24, 127.06, 126.93, 126.75, 126.54, 126.35, 126.08, 125.85 (aromatic CH), 96.90 (C-1a), 96.71 (2 C, C-1c and 1d), 96.18 (C-1b), 82.15 (2 C, C-3a and 3d), 81.88 (C-3b), 81.71 (C-3c), 80.38 (C-2a), 80.22 (C-2c), 79.98 (C-2b), 79.38 (C-2d), 77.65 (2 C, C-4b and 4d), 75.51, 75.41, 75.27, 74.99, 74.07, 74.01, 73.49, 73.43, 73.34, 73.23, 72.96 (CH<sub>2</sub>), 72.06 (C-4a), 71.97 (C-4c), 71.54 (CH<sub>2</sub>), 71.40 (C-5b), 70.91 (C-5d), 69.83 (C-5c), 69.70 (C-5a), 68.95 (2 C, C-6a and 6c), 68.15 (C-6d), 64.90 (C-1°), 64.55 (C-6b), 48.36 (C-3°), 28.90 (C-2°). HR-MS:

Calculated for  $C_{122}H_{127}O_{21}N_3$   $[M+H]^+$ : 1970.9035; found: 1970.9066.

### Synthesis of tetraglucoside **35**

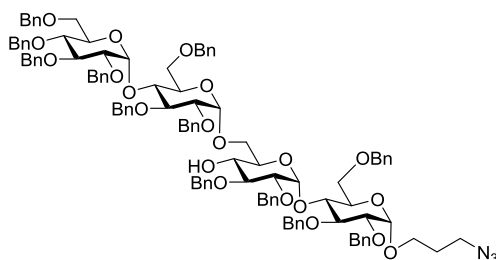

The reaction was carried out according to the general procedure D, using **34** (1.20 g, 0.61 mmol, 0.05 M in DCM:H<sub>2</sub>O) and DDQ (152 mg, 0.67 mmol). The product was purified by silica gel column chromatography (Tol:EA = 25:1). Compound **35** (928mg, 84% yield, Tol:EA = 12:1, *R<sub>f</sub>* = 0.28) was obtained as a colorless syrup.  $[\alpha]_D^{20} +64.3$  (*c*=1, CHCl<sub>3</sub>). IR (neat, cm<sup>-1</sup>)  $\nu$ 695, 733, 747, 764, 911, 1026, 1044, 1092, 1155, 1208, 1261, 1275, 1355, 1363, 1456, 2095, 2868, 2926, 3031, 3064. <sup>1</sup>H-NMR (CDCl<sub>3</sub>, 400MHz)  $\delta$ 7.43-7.09 (m, 60 H, aromatic *H*), 5.70 (d, *J* = 3.6 Hz, 1 H, H-1d), 5.67 (d, *J* = 3.6 Hz, 1 H, H-1b), 5.04 (d, *J* = 12.0 Hz, 1 H, CHH), 4.99 (d, *J* = 11.6 Hz, 1 H, CHH), 4.89-4.39 (m, 23 H, H-1a, H-1c, 21 CHH), 4.25 (d, *J* = 12.4 Hz, 1 H, CHH), 4.11-3.97 (m, 4 H, H-4a, H-4c, H-3a, H-3c), 3.88-3.33 (m, 24 H), 1.93-1.86 (m, 2 H, H-2°). <sup>13</sup>C-APT (CDCl<sub>3</sub>, 100 MHz)  $\delta$  139.09, 138.98, 138.86, 138.62, 138.19, 138.10, 138.06, 138.00, 137.97 (aromatic C), 128.77, 128.57, 128.51, 128.44, 128.43, 128.37, 128.35, 128.29, 128.20, 128.15, 128.05, 127.92, 127.90, 127.84, 127.79, 127.74, 127.70, 127.66, 127.64, 127.60, 127.54, 127.44, 127.23, 127.12, 126.75, 126.69 (aromatic CH), 97.53 (C-1a), 96.90 (C-1c), 96.82 (C-1d), 96.52 (C-1b), 82.06 (C-3d and 3c), 81.96 (C-3a), 81.37 (C-3b), 80.44 (C-2c), 80.04 (C-2a), 79.40 (C-2d), 79.26 (C-2b), 77.69 (C-4d), 75.63, 75.53, 75.02, 74.22, 73.54, 73.32, 73.27, 72.57 (CH<sub>2</sub>), 72.03 (C-4a), 71.92 (C-4c), 71.72 (C-4b), 71.06 (C-5b), 70.94 (C-5d), 69.84 (C-5c and 5a), 68.92 (C-6a), 68.83 (C-6c), 68.17 (C-6d), 67.73 (C-6b), 64.90 (C-1°), 48.40 (C-3°), 28.93 (C-2°). HR-MS: Calculated for  $C_{111}H_{119}O_{21}N_3$   $[M+H]^+$ : 1830.8409; found: 1830.8458.

### Synthesis of pentaglucoside **36**

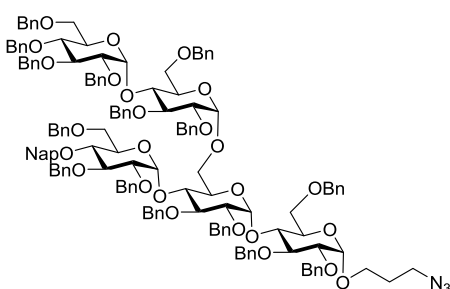

The reaction was carried out according to the standard procedure B. The donor **3b** (1.20 g, 1.57 mmol, co-evaporated with toluene 3 times) was dissolved in dry DCM (6 mL) under nitrogen and stirred over fresh flame-dried molecular sieves 3A, after which DMF (1.98 mL, 25.1 mmol) was added to the solution. The solution was cooled to -78 °C, after which TfOH (139  $\mu$ L, 1.57 mmol) was added. After 30 min, the pre-activation was complete as indicated by TLC-analysis. Acceptor **35** (860 mg, 0.47 mmol, dissolved in a little DCM and washed 3 times with DCM, totally 3 mL) was added to the solution and the mixture was placed in an ice bath. The reaction was stirred at 0 °C until TLC-analysis showed complete conversion of the acceptor. The reaction was quenched with

Et<sub>3</sub>N, filtered and concentrated *in vacuo*. The product was purified by size exclusion (DCM:MeOH = 1:1). Compound **36** (1.04 g, 91% yield,  $\alpha:\beta > 20:1$ , Tol:EA = 12:1, R<sub>f</sub> = 0.64) was obtained as a colorless syrup.  $[\alpha]_D^{20} +60.5$  (c=1, CHCl<sub>3</sub>). IR (neat, cm<sup>-1</sup>) v696, 749, 765, 1297, 1275, 2094, 2868, 2925, 3012. <sup>1</sup>H-NMR (CDCl<sub>3</sub>, 400MHz)  $\delta$  7.69-7.62 (m, 3 H, aromatic H), 7.51 (s, 1 H, aromatic H), 7.39-7.36 (m, 2 H, aromatic H), 7.28-7.02 (m, 74 H, aromatic H), 6.97-6.95 (m, 2 H, aromatic H), 5.72-5.71 (bt, 2 H, H-1d, H-1e), 5.54 (d, *J* = 3.6 Hz, 1 H, H-1b), 5.35 (d, *J* = 3.6 Hz, 1 H, H-1c), 5.05 (d, *J* = 11.6 Hz, 1 H, CHH), 4.96-3.56 (m, 59H), 3.47-3.30 (m, 6H), 3.20 (dd, *J*<sub>1</sub> = 3.6 Hz, *J*<sub>2</sub> = 9.6 Hz, 1 H, H-2b), 1.91-1.85 (m, 2 H, H-2°). <sup>13</sup>C-APT (CDCl<sub>3</sub>, 100 MHz,)  $\delta$  139.12, 138.98, 138.89, 138.87, 138.72, 138.51, 138.25, 138.18, 138.16, 138.11, 138.07, 138.04, 137.72, 135.91, 133.29, 133.01 (aromatic C), 128.58, 128.43, 128.36, 128.34, 128.32, 128.27, 128.20, 128.18, 128.15, 128.12, 128.06, 127.98, 127.94, 127.90, 127.77, 127.72, 127.68, 127.65, 127.56, 127.47, 127.43, 127.31, 127.24, 127.04, 126.94, 126.79, 126.75, 126.61, 126.24, 126.05, 125.88 (aromatic CH), 97.14 (C-1a), 96.95 (C-1e), 96.63 (C-1d), 96.51 (C-1c), 95.80 (C-1b), 82.13 (C-3a), 81.98 (2 C, C-3d, C-3e), 81.78 (C-3c), 81.08 (C-3b), 80.34 (C-2a), 80.20 (2 C, C-2c, C-2d), 79.46 (C-2b), 79.25 (C-2e), 77.69 (C-4d), 77.57 (C-4e), 75.49, 75.24, 75.01, 74.43 (CH<sub>2</sub>), 74.24 (C-4b), 74.12, 73.68, 73.49, 73.35, 73.24, 73.11, 72.89 (CH<sub>2</sub>), 72.38 (C-4a), 72.24 (C-5e), 72.11 (C-5b), 71.76 (CH<sub>2</sub>), 71.60 (C-4c), 70.99 (C-5d), 69.90 (C-5c), 69.80 (C-5a), 68.98 (C-6e), 68.80 (2 C, C-6a, C-6c), 68.20 (C-6d), 64.91 (C-1°), 64.30 (C-6b), 48.38 (C-3°), 28.91 (C-2°). MALDI-TOF: Calculated for C<sub>149</sub>H<sub>155</sub>O<sub>26</sub>N<sub>3</sub> [M+H<sup>+</sup>]: 2403.1; found: 2397.7.

#### Synthesis of pentaglycoside **37**

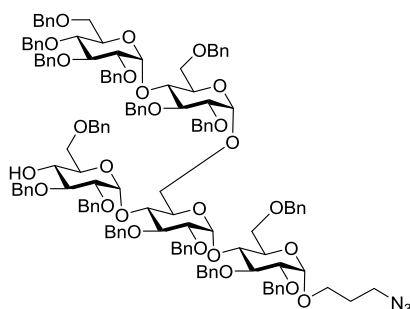

The reaction was carried out according to the general procedure D, using **36** (1.10 g, 0.46 mmol, 0.05 M in DCM:H<sub>2</sub>O) and DDQ (125 mg, 0.55 mmol). The product was purified by silica gel column chromatography (Tol:EA = 20:1). Compound **37** (777mg, 75% yield, Tol:EA = 12:1, R<sub>f</sub> = 0.36) was obtained as a colorless syrup.  $[\alpha]_D^{20} +79.6$  (c=1, CHCl<sub>3</sub>). IR (neat, cm<sup>-1</sup>) v697, 749, 764, 1028, 1045, 1098, 1155, 1261, 1275, 2098, 2855, 2923, 3031. <sup>1</sup>H-NMR (CDCl<sub>3</sub>, 400MHz)  $\delta$  7.28-6.98 (m, 75 H, aromatic H), 5.74(d, *J* = 3.2 Hz, 1 H, H-1d), 5.63 (d, *J* = 3.2 Hz, 1 H, H-1e), 5.56 (d, *J* = 3.2 Hz, 1 H, H-1b), 5.32 (d, *J* = 3.2 Hz, 1 H, H-1c), 5.06 (d, *J* = 12.0 Hz, 1 H, CHH), 4.93-3.36 (m, 63H), 3.21 (dd, *J*<sub>1</sub> = 3.2 Hz, *J*<sub>2</sub> = 9.6 Hz, 1 H, H-2b), 1.92-1.86 (m, 2 H, H-2°). <sup>13</sup>C-APT (CDCl<sub>3</sub>, 12 MHz,)  $\delta$  139.02, 138.96, 138.92, 138.82, 138.55, 138.43, 138.34, 138.21, 138.17, 138.08, 138.03, 137.96, 137.59 (aromatic C), 128.53, 128.38, 128.28, 128.15, 128.08, 128.03, 127.88, 127.84, 127.76, 127.70, 127.68, 127.57, 127.45, 127.42, 127.38, 127.31, 127.20, 127.09, 127.02, 126.93, 126.79, 126.55 (aromatic CH), 96.90 (C-1a), 96.87 (C-1e), 96.55 (C-1c), 95.72 (C-1d), 95.68 (C-1b), 82.15 (C-3a), 82.00 (C-3e), 81.59 (C-3c), 81.41 (C-3d), 81.26 (C-3b), 80.14 (C-2a), 80.09 (C-2c), 79.74 (C-2b), 79.60 (C-2d), 79.31 (C-2e), 77.65 (C-4d), 75.50, 75.21, 74.92, 74.20, 74.08, 73.89, 73.76, 73.44, 73.29, 73.20, 73.07, 73.02, 72.96, 72.74, 72.64, 71.84, 71.79, 71.47 (CH<sub>2</sub>), 71.44 (C-4b), 71.84 (2 C, C-4e, C-4a),

71.79 (2 C, C-5b, C-5d), 71.47 (CH<sub>2</sub>), 71.44 (C-4c), 70.98 (C-4c), 70.85 (C-5e), 69.83 (C-5c), 69.76 (C-6), 69.70 (C-5a), 68.91, 68.60, 68.21 (3 C-6), 64.86 (C-1°), 64.20 (C-6b), 48.31 (C-3°), 28.87 (C-2°). MALDI-TOF: Calculated for C<sub>138</sub>H<sub>147</sub>O<sub>26</sub>N<sub>3</sub> [M+H<sup>+</sup>]: 2263.0; found: 2259.9.

### Synthesis of hexasaccharide **38**

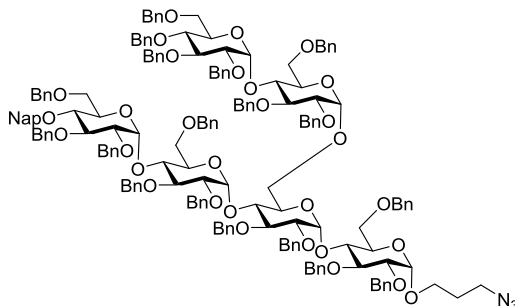

The reaction was carried out according to the standard procedure B. The donor **3b** (860 mg, 1.13 mmol, co-evaporated with toluene 3 times) was dissolved in dry DCM (3 mL) under nitrogen and stirred over fresh flame-dried molecular sieves 3A, after which DMF (1.30 mL, 16.5 mmol) was added to the solution. The solution was cooled to -78 °C, after which TfOH (100 μL, 1.13 mmol) was added. After 30 min, the pre-activation was complete as indicated by TLC-analysis. Acceptor **37** (620 mg, 0.27 mmol, dissolved in a little DCM and washed 3 times with DCM, totally 3 mL) was added to the solution and the mixture was placed in an ice bath. The reaction was stirred at 0 °C until TLC-analysis showed complete conversion of the acceptor. The reaction was quenched with Et<sub>3</sub>N, filtered and concentrated *in vacuo*. The product was purified by size exclusion (DCM:MeOH = 1:1). Compound **38** (717mg, 93% yield, α:β > 20:1, Tol:EA = 12:1 =, R<sub>f</sub> = 0.64) was obtained as a colorless syrup. [α]<sub>D</sub><sup>20</sup> +62.6 (c=1, CHCl<sub>3</sub>). IR (neat, cm<sup>-1</sup>) ν 696, 749, 764, 1028, 1042, 1094, 1144, 1155, 1208, 1261, 1275, 1456, 2096, 2860, 2923, 3031. <sup>1</sup>H-NMR (CDCl<sub>3</sub>, 400 MHz) δ 7.80-7.77 (m, 1 H, aromatic H), 7.71-7.67 (m, 2 H, aromatic H), 7.46-7.42 (m, 3 H, aromatic H), 7.34-6.92 (m, 91 H, aromatic H), 5.78 (d, J = 3.6 Hz, 1 H, H-1d), 5.74 (d, J = 3.6 Hz, 1 H, H-1e), 5.58 (d, J = 3.6 Hz, 1 H, H-1b), 5.48 (d, J = 3.6 Hz, 1 H, H-1f), 5.33 (d, J = 3.6 Hz, 1 H, H-1c), 5.14 (d, J = 10.8 Hz, 1 H, CHH), 5.04 (d, J = 11.6 Hz, 1 H, CHH), 4.91-3.30 (m, 75 H), 3.25 (dd, J<sub>1</sub> = 3.6 Hz, J<sub>2</sub> = 10.0 Hz, 1 H, H-2b), 1.90-1.84 (m, 2 H, H-2°). <sup>13</sup>C-APT (CDCl<sub>3</sub>, 100 MHz) δ 139.37, 139.25, 139.00, 138.89, 138.78, 138.53, 138.40, 138.26, 138.23, 138.11, 138.08, 137.98, 137.93, 136.10, 133.35, 133.05 (aromatic C), 129.17, 128.59, 128.05, 127.71, 127.68, 127.41, 127.23, 127.04, 126.96, 126.75, 126.72, 126.58, 126.25, 126.11, 125.95, 125.43 (aromatic CH), 96.99 (C-1a, 1e, 1f), 96.84 (C-1d), 96.70 (C-1c), 96.28 (C-1b), 82.29, 82.16, 82.00, 81.87, 81.56 (5 C-3), 80.62 (C-2), 80.48 (C-3), 80.42, 80.35, 79.52, 79.25, 78.88 (5 C-2), 78.49, 77.78 (2 C-4), 75.58, 75.34, 75.17, 74.98, 74.30, 74.01, 73.58, 73.55, 73.44, 73.35, 73.29, 73.07 (CH<sub>2</sub>), 72.90 (C-4), 72.81 (C-5), 72.64, 72.16 (CH<sub>2</sub>), 72.02, 71.85 (2 C-4), 71.28, 71.08, 71.00, 70.04, 70.00 (5 C-5), 69.28, 69.11, 69.00, 68.26, 68.16 (5 C-6), 64.94 (C-1°), 64.83 (C-6b), 48.44 (C-3°), 28.95 (C-2°). MALDI-TOF: Calculated for C<sub>176</sub>H<sub>183</sub>O<sub>31</sub>N<sub>3</sub> [M+H<sup>+</sup>]: 2835.3; found: 2833.2.

### Synthesis of hexaglucofuranoside **39**

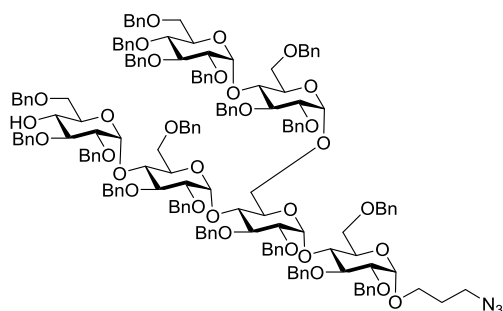

The reaction was carried out according to the general procedure D, using **38** (700 mg, 0.25 mmol, 0.05 M in DCM:H<sub>2</sub>O) and DDQ (67 mg, 0.30 mmol). The product was purified by silica gel column chromatography (PE:EA = 20:1). Compound **39** (440 mg, 66% yield, Tol:EA = 12:1, *R<sub>f</sub>* = 0.38) was obtained as a colorless syrup.  $[\alpha]_D^{20} +67.8$  (c=1, CHCl<sub>3</sub>). IR (neat, cm<sup>-1</sup>)  $\nu$  696, 732, 734, 1016, 1028, 1050, 1094, 1152, 1363, 1453, 2093, 2872, 2927. <sup>1</sup>H-NMR (CDCl<sub>3</sub>, 400 MHz)  $\delta$  7.30-6.93 (m, 90 H, aromatic *H*), 5.78 (d, *J* = 3.6 Hz, 1 H, H-1d), 5.73 (d, *J* = 3.6 Hz, 1 H, H-1e), 5.58 (d, *J* = 3.6 Hz, 1 H, H-1b), 5.53 (d, *J* = 3.2 Hz, 1 H, H-1f), 5.36 (d, *J* = 3.6 Hz, 1 H, H-1c), 5.09 (d, *J* = 11.2 Hz, 1 H, *CHH*), 5.05 (d, *J* = 12.0 Hz, 1 H, *CHH*), 4.91-3.31 (m, 75 H), 3.25 (dd, *J*<sub>1</sub> = 3.6 Hz, *J*<sub>2</sub> = 9.6 Hz, 1 H, H-2b), 1.92-1.86 (m, 2 H, H-2°). <sup>13</sup>C-APT (CDCl<sub>3</sub>, 100 MHz)  $\delta$  139.28, 139.19, 138.92, 138.86, 138.70, 138.49, 138.42, 138.17, 138.04, 137.95, 137.82 (aromatic C), 128.59, 128.51, 128.23, 128.18, 128.06, 128.01, 127.93, 127.86, 127.84, 127.82, 127.75, 127.59, 127.50, 127.45, 127.40, 127.34, 127.24, 127.04, 126.97, 126.69, 126.60, 126.55 (aromatic CH), 97.06 (C-1e), 96.96 (C-1a), 96.75 (C-1f), 96.64 (C-1c, 1d), 96.19 (C-1b), 82.09, 82.00, 81.83, 81.65, 81.58, 80.59 (6 C-3), 80.52, 80.36, 80.29, 79.13, 78.89 (6 C-2), 77.69 (2 C-4), 75.55, 75.29, 75.15, 74.99, 74.27, 74.02, 73.93, 73.60, 73.51, 73.37, 73.32, 73.25, 73.06, 72.98, 72.79, 72.65, 72.05, 71.91, 71.68, 71.57, 71.22, 70.59, 70.51, 69.98, 69.93, 69.69, 69.14, 68.96, 68.16, 64.92 (C-1°), 64.63 (C-6b), 48.41 (C-3°), 28.93 (C-2°). MALDI-TOF: Calculated for C<sub>165</sub>H<sub>175</sub>O<sub>31</sub>N<sub>3</sub> [M+H<sup>+</sup>]: 695.2; found: 2692.7.

### Synthesis of heptaglucofuranoside **40**

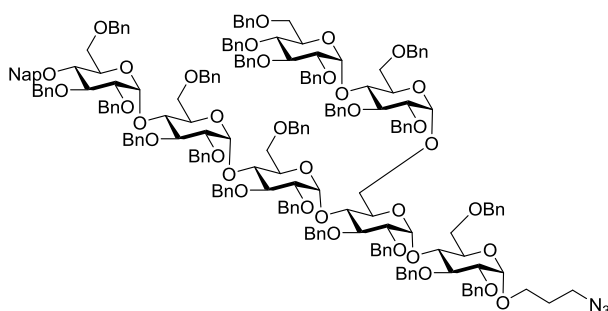

The reaction was carried out according to the standard procedure B. The donor **3b** (550 mg, 0.72 mmol, co-evaporated with toluene 3 times) was dissolved in dry DCM (1 mL) under nitrogen and stirred over fresh flame-dried molecular sieves 3A, after which DMF (900  $\mu$ L, 11.4 mmol) was added to the solution. The solution was cooled to -78 °C, after which TfOH (63  $\mu$ L, 0.71 mmol) was added. After 30 min, the pre-activation was complete as indicated by TLC-analysis. Acceptor **39** (360 mg, 0.13 mmol, dissolved in a little DCM and washed 3 times with DCM, totally 3 mL) was added to the solution and the mixture was placed in an ice bath. The reaction was stirred at 0 °C until TLC-analysis showed complete conversion of the acceptor. The reaction was quenched with

Et<sub>3</sub>N, filtered and concentrated *in vacuo*. The product was purified by size exclusion (DCM:MeOH = 1:1). Compound **40** (397 mg, 91% yield,  $\alpha:\beta > 20:1$ , Tol:EA = 12:1, *R<sub>f</sub>* = 0.67) was obtained as a colorless syrup.  $[\alpha]_D^{20} +67.5$  (*c*=1, CHCl<sub>3</sub>). IR (neat, cm<sup>-1</sup>)  $\nu$  696, 733, 1027, 1035, 1078, 1082, 1093, 1132, 1141, 1145, 1155, 1361, 1453, 1496, 2098, 2864, 2928. <sup>1</sup>H-NMR (CDCl<sub>3</sub>, 400 MHz)  $\delta$  7.80-7.78 (m, 1 H, aromatic *H*), 7.73-7.68 (m, 2 H, aromatic *H*), 7.50 (s, 1 H, aromatic *H*), 7.46-7.40 (m, 2 H, aromatic *H*), 7.28-6.88 (m, 106 H, aromatic *H*), 5.75 (d, *J* = 3.2 Hz, 1 H, H-1), 5.73 (d, *J* = 3.6 Hz, 1 H, H-1), 5.69 (d, *J* = 3.2 Hz, 1 H, H-1), 5.61 (d, *J* = 3.2 Hz, 1 H, H-1b), 5.49 (d, *J* = 2.8 Hz, 1 H, H-1), 5.34 (d, *J* = 3.2 Hz, 1 H, H-1c), 5.22 (d, *J* = 10.8 Hz, 1 H, CHH), 5.07 (d, *J* = 11.6 Hz, 1 H, CHH), 4.97-3.32 (m, 88 H), 3.25 (dd, *J*<sub>1</sub> = 3.6 Hz, *J*<sub>2</sub> = 10.0 Hz, 1 H, H-2b), 1.90-1.84 (m, 2 H, H-2°). <sup>13</sup>C-APT (CDCl<sub>3</sub>, 100 MHz,)  $\delta$  139.25, 139.13, 138.97, 138.89, 138.84, 138.78, 138.65, 138.45, 138.17, 138.12, 138.10, 138.08, 138.03, 137.95, 137.82, 137.78, 137.63, 136.03, 133.25, 132.93 (aromatic C), 128.51, 128.35, 128.30, 128.25, 128.21, 128.18, 128.12, 128.03, 127.97, 127.96, 127.89, 127.85, 127.82, 127.79, 127.67, 127.60, 127.54, 127.51, 127.47, 127.36, 127.26, 127.17, 127.03, 126.98, 126.88, 126.83, 126.66, 126.63, 126.53, 126.38, 126.10, 126.04, 125.87 (aromatic CH), 97.04, 96.89, 96.85, 96.77, 96.64, 96.25, 96.15 (7 C-1), 82.18, 82.07, 81.93, 81.84, 81.77, 81.26, 80.63, 80.34, 80.26, 80.20, 79.58, 79.52, 79.21, 78.79, 78.64, 77.64, 77.36, 75.55, 75.46, 75.05, 74.92, 74.22, 74.02, 73.93, 73.86, 73.48, 73.45, 73.40, 73.30, 73.24, 73.04, 72.97, 72.53, 72.46, 72.26, 72.19, 72.00, 71.84, 71.14, 70.92, 70.80, 69.90, 68.99, 68.85, 68.71, 68.08, 64.81 (C-1°), 64.69 (C-6b), 48.29 (C-3°), 28.83 (C-2°). MALDI-TOF: Calculated for C<sub>203</sub>H<sub>211</sub>O<sub>36</sub>N<sub>3</sub> [M<sup>+</sup>]: 3266.5; found: 3266.2.

#### Synthesis of heptaglycoside **41**

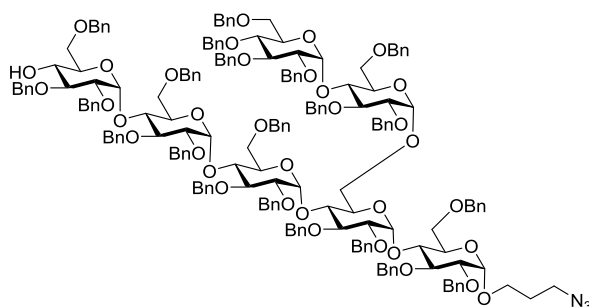

The reaction was carried out according to the general procedure D, using **40** (260 g, 0.080mmol, 0.05 M in DCM:H<sub>2</sub>O) and DDQ (20 mg, 0.09 mmol). The product was purified by silica gel column chromatography (Tol:EA = 20:1). Compound **41** (175mg, 70% yield, Tol:EA = 12:1, *R<sub>f</sub>* = 0.40) was obtained as a colorless syrup.  $[\alpha]_D^{20} +70.1$  (*c*=1, CHCl<sub>3</sub>). IR (neat, cm<sup>-1</sup>)  $\nu$  695, 731, 1026, 1036, 1092, 1135, 1152, 1207, 1363, 1453, 1496, 2098, 2857, 2923. <sup>1</sup>H-NMR (CDCl<sub>3</sub>, 500 MHz)  $\delta$  7.29-6.89 (m, 105 H, aromatic *H*), 5.73 (d, *J* = 3.0 Hz, 1 H, H-1), 5.67 (bd, 2 H, H-1), 5.59 (d, *J* = 3.0 Hz, 1 H, H-1b), 5.48 (bs, 1 H, H-1), 5.32 (bs, 1 H, H-1c), 5.19 (d, *J* = 11.0 Hz, 1 H, CHH), 5.04 (d, *J* = 11.5 Hz, 1 H, CHH), 4.93 (d, *J* = 11.5 Hz, 1 H, CHH), 4.88-3.32 (m, 86 H), 3.27 (bd, 1 H, H-2b), 2.52 (s, 1 H, OH), 1.89-1.88 (m, 2 H, H-2°). <sup>13</sup>C-APT (CDCl<sub>3</sub>, 125 MHz,)  $\delta$  139.34, 139.24, 139.08, 139.00, 138.97, 138.95, 138.89, 138.78, 138.56, 138.52, 138.24, 138.22, 138.20, 138.16, 138.11, 138.07, 138.03, 137.93, 137.88, 137.72 (aromatic C), 128.60, 128.53, 128.46, 128.44, 128.39, 128.37, 128.34, 128.29, 128.26, 128.19, 128.12, 128.05, 127.98, 127.93, 127.90, 127.86, 127.81, 127.78, 127.71, 127.64, 127.60, 127.55, 127.52, 127.46, 127.38, 127.37, 127.24, 127.14, 127.04, 126.97, 126.91, 126.74, 126.61, 126.49 (aromatic CH), 97.12 (C-1), 97.00 (C-1), 96.85 (C-1), 96.76 (2 C-1),

96.38 (C-1), 96.21 (C-1), 82.16, 81.99, 81.88, 81.50, 81.34, 80.68, 80.43, 80.38, 80.30, 79.66, 79.35, 79.13, 78.79, 77.77, 75.63, 75.58, 75.00, 74.32, 74.02, 73.92, 73.67, 73.56, 73.47, 73.39, 73.35, 73.33, 73.12, 73.03, 73.00, 72.87, 72.75, 72.64, 72.43, 72.29, 72.11, 71.99, 71.70, 71.24, 71.03, 70.90, 70.45, 70.04, 70.01, 69.90 (C-6), 69.13 (C-6), 69.02 (C-6), 68.98 (C-6), 68.78 (C-6), 68.25 (C-6), 64.94 (C-1°), 64.81 (C-6b), 48.43 (C-3°), 28.96 (C-2°). MALDI-TOF: Calculated for  $C_{192}H_{203}O_{36}N_3$  [ $M^+$ ]: 3126.4; found: 3126.1.

#### Synthesis of octaglucoide **42**

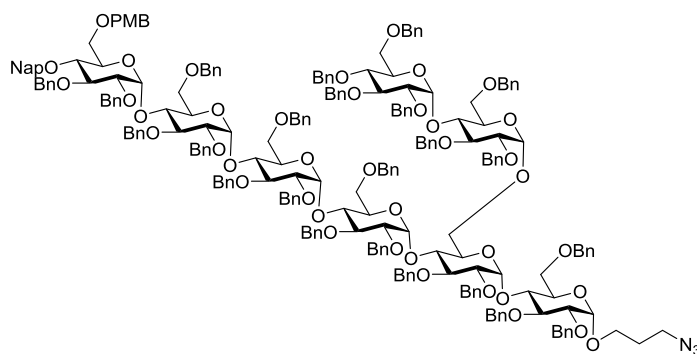

The reaction was carried out according to the standard procedure B. The donor **5b** (285 mg, 0.36 mmol, co-evaporated with toluene 3 times) was dissolved in dry DCM (1 mL) under nitrogen and stirred over fresh flame-dried molecular sieves 3A, after which DMF (455  $\mu$ L, 5.78 mmol) was added to the solution. The solution was cooled to -78  $^{\circ}$ C, after which TfOH (31  $\mu$ L, 0.35 mmol) was added. After 30 min, the pre-activation was complete as indicated by TLC-analysis. Acceptor **15** (680 mg, 0.76 mmol, dissolved in a little DCM and washed 3 times with DCM, totally 3 mL) was added to the solution and the mixture was placed in an ice bath. The reaction was stirred at 0  $^{\circ}$ C until TLC-analysis showed complete conversion of the acceptor. The reaction was quenched with  $Et_3N$ , filtered and concentrated *in vacuo*. The product was purified by size exclusion (DCM:MeOH = 1:1). Compound **42** (135 mg, 80% yield,  $\alpha:\beta > 20:1$ , Tol:EA = 12:1,  $R_f = 0.64$ ) was obtained as a colorless syrup.  $[\alpha]_D^{20} +69.7$  ( $c=1$ ,  $CHCl_3$ ). IR (neat,  $cm^{-1}$ )  $\nu$  697, 734, 1028, 1035, 1074, 1077, 1082, 1093, 1095, 1154, 1363, 2093, 2863, 2928.  $^1H$ -NMR ( $CDCl_3$ , 400 MHz)  $\delta$  7.80-7.78 (m, 1 H, aromatic H), 7.72-7.68 (m, 2 H, aromatic H), 7.45-7.42 (m, 3 H, aromatic H), 7.30-6.86 (m, 118 H, aromatic H), 6.73-6.71 (m, 2 H, aromatic H), 5.75-5.71 (m, 3H, 3 H-1), 5.71 (bt, 2 H, 2 H-1), 5.46 (d,  $J = 3.2$  Hz, 1 H, H-1), 5.33 (d,  $J = 3.2$  Hz, 1 H, H-1), 5.21 (d,  $J = 10.8$  Hz, 1 H, CHH), 5.05 (d,  $J = 11.6$  Hz, 1 H, CHH), 4.92-3.24 (m, 104 H), 1.90-1.83 (m, 2 H, H-2°).  $^{13}C$ -APT ( $CDCl_3$ , 125 MHz,)  $\delta$  159.29, 139.33, 139.23, 139.04, 139.01, 138.98, 138.85, 138.56, 138.32, 138.21, 138.12, 138.09, 138.06, 138.01, 137.89, 137.86, 137.74, 136.17, 133.34, 133.02, 130.01 (aromatic C), 129.95, 128.60, 128.42, 128.39, 128.36, 128.34, 128.30, 128.26, 128.20, 128.12, 128.06, 128.00, 127.97, 127.94, 127.90, 127.88, 127.84, 127.74, 127.70, 127.65, 127.59, 127.56, 127.54, 127.47, 127.42, 127.36, 127.25, 127.14, 127.05, 126.96, 126.90, 126.75, 126.72, 126.69, 126.61, 126.49, 126.46, 126.11, 125.92, 113.78 (aromatic CH), 97.07 (C-1), 96.99 (2 C-1), 96.73 (2 C-1), 96.34 (2 C-1), 96.16 (C-1), 82.27, 82.17, 82.01, 81.97, 81.88, 81.74, 81.38, 80.87, 80.40, 80.28, 79.82, 79.56, 79.43, 79.32, 78.87, 78.73, 77.76, 77.70, 75.64, 75.54, 75.08, 75.02, 74.30, 74.01, 73.88, 73.56, 73.44, 73.40, 73.35, 73.31, 73.14, 73.09, 73.03, 72.84, 72.75, 72.64, 72.52, 72.23, 72.11, 71.99, 71.79, 71.25, 71.00, 70.93, 70.02, 69.98, 69.12, 69.02, 68.94, 68.61, 68.22, 67.62, 64.91 (C-1°), 64.76 (C-6b), 55.21 (OCH<sub>3</sub>), 48.41 (C-3°), 28.94 (C-2°). MALDI-TOF: Calculated for  $C_{231}H_{241}O_{42}N_3$  [ $M^+$ ]: 3728.7;

found: 3728.9.

### Synthesis of octaglucoide **43**

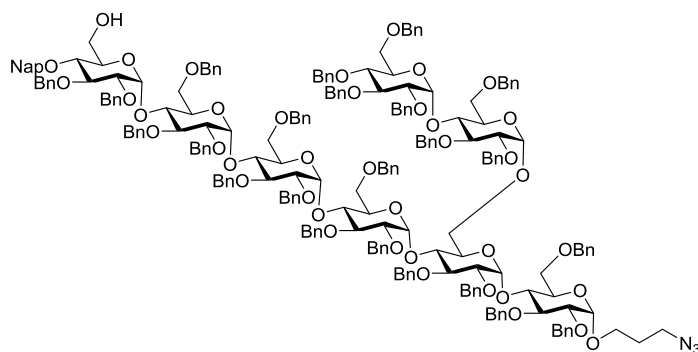

The reaction was carried out according to the general procedure E attrt about 1 h, using **42** (70 mg, 0.019 mmol, 0.01 M in DCM:HFIP), triethylsilane (3  $\mu$ L, 0.018 mmol) and 0.1M HCl/HFIP (20  $\mu$ L, 0.19 mmol). The product was purified by silica gel column chromatography (Tol:EA = 20:1). Compound **43** (60 mg, 88% yield, Tol:EA = 12:1,  $R_f$  = 0.29) was obtained as a colorless syrup.  $[\alpha]_D^{20}$  +79.3 ( $c=1$ ,  $\text{CHCl}_3$ ). IR (neat,  $\text{cm}^{-1}$ )  $\nu$  696, 735, 1027, 1039, 1042, 1078, 1094, 1138, 1155, 1363, 1454, 2097, 2858, 2927.  $^1\text{H-NMR}$  ( $\text{CDCl}_3$ , 400 MHz)  $\delta$  7.81-7.72 (m, 3 H, aromatic H), 7.67 (s, 1 H, aromatic H), 7.46-7.38 (m, 3 H, aromatic H), 7.30-6.86 (m, 115 H, aromatic H), 5.75 (d,  $J$  = 3.6 Hz, 1 H, H-1), 5.73 (d,  $J$  = 3.6 Hz, 1 H, H-1), 5.65 (d,  $J$  = 3.6 Hz, 1 H, H-1), 5.61 (d,  $J$  = 3.6 Hz, 1 H, H-1b), 5.56 (d,  $J$  = 3.6 Hz, 1 H, H-1), 5.48 (d,  $J$  = 3.2 Hz, 1 H, H-1), 5.34 (d,  $J$  = 3.2 Hz, 1 H, H-1c), 5.22 (d,  $J$  = 11.6 Hz, 1 H, CHH), 5.06 (d,  $J$  = 12.0 Hz, 1 H, CHH), 4.99 (d,  $J$  = 11.2 Hz, 1 H, CHH), 4.94 (d,  $J$  = 11.6 Hz, 1 H, CHH), 4.90-3.31 (m, 97 H), 3.27 (dd,  $J_1$  = 3.6 Hz,  $J_2$  = 10.0 Hz, 1 H, H-2b), 1.90-1.84 (m, 2 H, H-2°).  $^{13}\text{C-APT}$  ( $\text{CDCl}_3$ , 100 MHz,)  $\delta$  139.29, 139.18, 138.98, 138.94, 138.80, 138.77, 138.72, 138.52, 138.26, 138.17, 138.13, 138.08, 138.03, 138.00, 137.93, 137.94, 137.81, 137.66, 135.80, 133.32, 133.07 (aromatic C), 128.59, 128.45, 128.42, 128.37, 138.31, 128.26, 128.20, 128.10, 128.06, 128.00, 127.94, 127.89, 127.87, 127.85, 127.80, 127.75, 127.71, 127.64, 127.62, 127.54, 127.46, 127.32, 127.24, 127.16, 127.11, 127.04, 126.95, 126.83, 126.71, 126.68, 126.64, 126.61, 126.41, 126.23, 126.11, 126.06 (aromatic CH), 97.07 (C-1), 96.97 (C-1), 96.68 (3 C-1), 96.29 (C-1), 96.17 (C-1), 96.10 (C-1), 82.15, 82.02, 81.96, 81.847, 81.36, 80.88, 80.36, 80.23, 79.61, 79.47, 79.26, 78.83, 78.66, 77.72, 77.65, 75.64, 75.53, 75.32, 75.01, 74.28, 74.10, 74.01, 73.88, 73.63, 73.53, 73.44, 73.39, 73.32, 73.27, 73.15, 73.06, 72.82, 72.41, 72.07, 71.87, 71.66, 71.21, 70.97, 70.86, 70.82, 69.96, 69.07, 68.89, 68.52, 68.37, 68.14, 64.88 (C-1°), 64.67 (C-6b), 61.73 (C-6), 48.38 (C-3°), 28.92 (C-2°). MALDI-TOF: Calculated for  $\text{C}_{223}\text{H}_{233}\text{O}_{41}\text{N}_3$   $[\text{M}+\text{H}^+]$ : 3609.6; found: 3604.8.



## Synthesis of nonaglucooside **44**

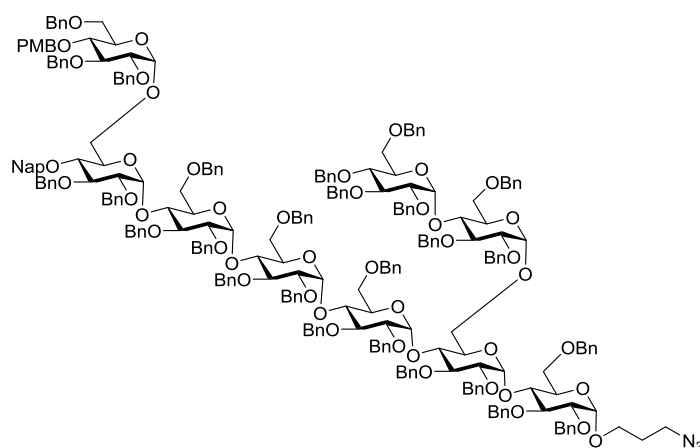

The reaction was carried out according to the standard procedure C, using **4b** (100 mg, 0.13 mmol), **43** (40 mg, 0.011 mmol, 0.005 M in DCM),  $\text{Ph}_3\text{P}=\text{O}$  (225 mg, 0.81 mmol) and TMSI (30  $\mu\text{L}$ , 0.21 mmol). The product was purified by size exclusion (DCM:MeOH = 1:1). Compound **44** (31 mg, 67% yield,  $\alpha:\beta > 20:1$ , Tol:EA = 12:1,  $R_f = 0.65$ ) was obtained as a colorless syrup.  $[\alpha]_D^{20} +86.6$  ( $c=1$ ,  $\text{CHCl}_3$ ). IR (neat,  $\text{cm}^{-1}$ )  $\nu$  696, 734, 1008, 1028, 1049, 1084, 1091, 1154, 1362, 2097, 2858, 2924.  $^1\text{H-NMR}$  ( $\text{CDCl}_3$ , 500 MHz)  $\delta$  7.75 (bd, 1 H, aromatic *H*), 7.70 (bd, 1 H, aromatic *H*), 7.67-7.64 (m, 3 H, aromatic *H*), 7.43-7.36 (m, 3 H, aromatic *H*), 7.29-6.87 (31mg, 132 H, aromatic *H*), 6.76-6.73 (m, 2 H, aromatic *H*), 5.74 (d,  $J = 3.5$  Hz, 1 H, H-1), 5.71 (d,  $J = 3.5$  Hz, 1 H, H-1), 5.65 (d,  $J = 3.5$  Hz, 1 H, H-1), 5.61 (d,  $J = 3.5$  Hz, 1 H, H-1), 5.60 (d,  $J = 3.5$  Hz, 1 H, H-1), 5.47 (d,  $J = 3.5$  Hz, 1 H, H-1), 5.32 (d,  $J = 3.5$  Hz, 1 H, H-1), 5.20 (d,  $J = 11.0$  Hz, 1 H, CHH), 5.09 (d,  $J = 3.5$  Hz, 1 H, H-1), 5.02 (bt, 2 H, CHH), 4.92-3.31 (m, 113 H), 3.27 (dd,  $J_1 = 3.5$  Hz,  $J_2 = 9.0$  Hz, 1 H, H-2), 3.23-3.20 (m, 1 H, H-2), 1.89-1.84 (m, 2 H, H-2 $^\circ$ ).  $^{13}\text{C-APT}$  ( $\text{CDCl}_3$ , 125 MHz,)  $\delta$  159.24, 139.34, 139.24, 139.09, 139.05, 139.01, 138.87, 138.78, 138.58, 138.39, 138.32, 138.28, 138.24, 138.21, 138.19, 138.14, 138.12, 138.08, 137.96, 137.91, 137.87, 137.77, 136.42, 133.41, 133.04, 130.86 (aromatic C), 129.65, 128.60, 128.46, 128.44, 128.40, 128.34, 128.30, 128.21, 128.19, 128.12, 128.06, 128.04, 127.99, 127.97, 127.95, 127.90, 127.88, 127.80, 127.76, 127.74, 127.72, 127.69, 127.65, 127.61, 127.57, 127.54, 127.47, 127.42, 127.37, 127.35, 127.25, 127.15, 127.09, 127.05, 126.97, 126.91, 126.76, 126.74, 126.72, 126.48, 126.38, 126.19, 126.07, 125.84, 113.81 (aromatic CH), 97.25 (C-1), 97.08 (C-1), 97.00 (C-1), 96.76 (2 C-1), 96.33 (2 C-1), 96.20 (2 C-1), 82.14, 82.01, 81.89, 81.74, 81.38, 80.86, 80.42, 80.30, 80.25, 80.16, 79.78, 79.43, 79.36, 78.88, 78.76, 77.79, 77.54, 77.34, 75.64, 75.54, 75.35, 75.19, 75.02, 74.77, 74.31, 73.99, 73.88, 73.68, 73.57, 73.44, 73.38, 73.33, 73.15, 73.10, 72.83, 72.71, 72.66, 72.61, 72.13, 72.05, 71.84, 71.71, 71.27, 71.03, 70.91, 70.78, 70.35, 70.04, 70.01, 69.15, 69.02, 68.97, 68.85, 68.62, 68.45, 68.26, 65.05, 64.92 (C-1 $^\circ$ ), 64.79 (C-6), 55.38 (OCH<sub>3</sub>), 48.42 (C-3 $^\circ$ ), 28.96 (C-2 $^\circ$ ). MALDI-TOF: Calculated for  $\text{C}_{258}\text{H}_{269}\text{O}_{47}\text{N}_3$   $[\text{M}+\text{H}^+]$ : 4161.8; found: 4161.7.

Synthesis of nonagluconide **1**.

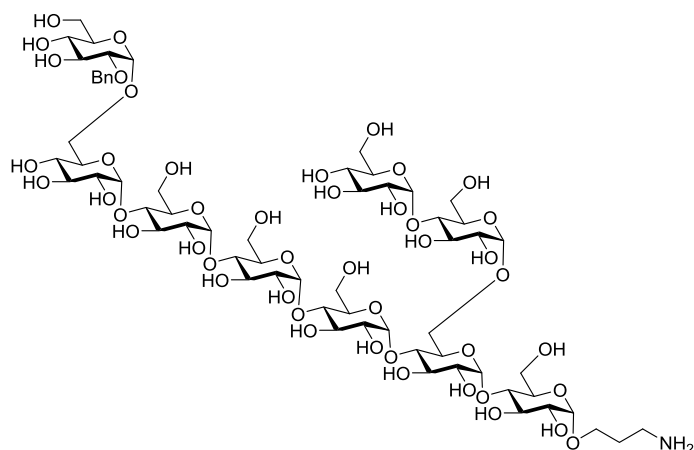

Compound **40** (20 mg, 0.0048 mmol) was dissolved in THF/H<sub>2</sub>O/*tert*-BuOH (4 ml/4 ml/1.6 ml) before a catalytic amount of Pd(OH)<sub>2</sub>/C was added. The reaction mixture was stirred for 3 days under a H<sub>2</sub> atmosphere (3.5 bar), filtered and concentrated *in vacuo*. A white powder **1** was obtained, which was purified by gel filtration (HW-40, 0.15M NH<sub>4</sub>OAc in H<sub>2</sub>O) to yield **1** (4.7 mg, 61%). <sup>1</sup>H-NMR (CDCl<sub>3</sub>, 500 MHz) δ 5.40-5.38 (m, 3 H, 3 H-1), 5.35 (bt, 2 H, 2 H-1), 5.32 (d, *J* = 4.0 Hz, 1 H, H-1), 4.96-4.93 (m, 3 H, 3 H-1), 4.02-3.54 (m, 53 H), 3.49 (t, *J* = 9.5 Hz, 1 H), 3.44-3.39 (m, 2 H), 3.20-3.10 (m, 2 H), 2.02-1.97 (m, 2 H). <sup>13</sup>C-APT (CDCl<sub>3</sub>, 125 MHz,) δ 100.03, 99.94, 99.83, 99.63, 99.56, 98.60, 98.11 (9 C-1), 78.86, 77.94, 77.57, 77.16, 76.78, 73.44, 73.02, 72.98, 72.79, 71.87, 71.83, 71.69, 71.53, 71.38, 71.31, 70.90, 70.57, 71.42, 70.23, 69.54, 69.41, 69.33, 67.55, 65.93, 60.79, 60.54, 60.49, 60.44, 37.85, 26.60. HR-MS: Calculated for C<sub>57</sub>H<sub>99</sub>O<sub>46</sub>N [M+H<sup>+</sup>]: 1534.5511; found: 1534.5779.

## References

- (S1) Heuckendorff, M.; Poulsen, L. T.; Jensen, H. H. *J. Org. Chem.* **2016**, *81*, 4988.
- (S2) Yu, H. Tao, *Tetrahedron Lett.* **2001**, *42*, 2405-2407.
- (S3) Herczeg, M.; Mező, E.; Eszenyi, D.; Antus, S.; Borbás, A. *Tetrahedron* **2014**, *70*, 2919.
- (S4) Herczeg, M.; Mező, E.; Lázár, L.; Fekete, A.; Kövér, K. E.; Antus, S.; Borbás, A. *Tetrahedron* **2013**, *69*, 3149.
- (S5) Ranade, S. C.; Kaeothip, S.; Demchenko, A. V. *Org. Lett.* **2010**, *12*, 5628-5631.
- (S6) Garegg, P. J.; Hultberg, H. *Carbohydr. Res.* **1981**, *93*, C10-C11.
- (S7) Koto, S.; Takebe, Y.; Zen, S. *Bull. Chem. Soc. Jpn.* **1972**, *45*, 291-293.
- (S8) Sollogoub, M.; Das, S. K.; Mallet, J.-M.; Sinay, P. C. *R. Acad. Sci. Ser.* **21999**, *2*, 441-448.
- (S9) Kuester, J. M.; Dyong, I. *Justus Liebigs Ann. Chem.* **1975**, 2179-2189.
- (S10) Nigudkar, S. S.; Stine, K. J.; Demchenko, A. V. *J. Am. Chem. Soc.* **2014**, *136*, 921

NMR Spectra

<sup>1</sup>H-NMR, <sup>13</sup>C-APT, <sup>1</sup>H-<sup>1</sup>H COSY, HSQC, HMBC of **3b**

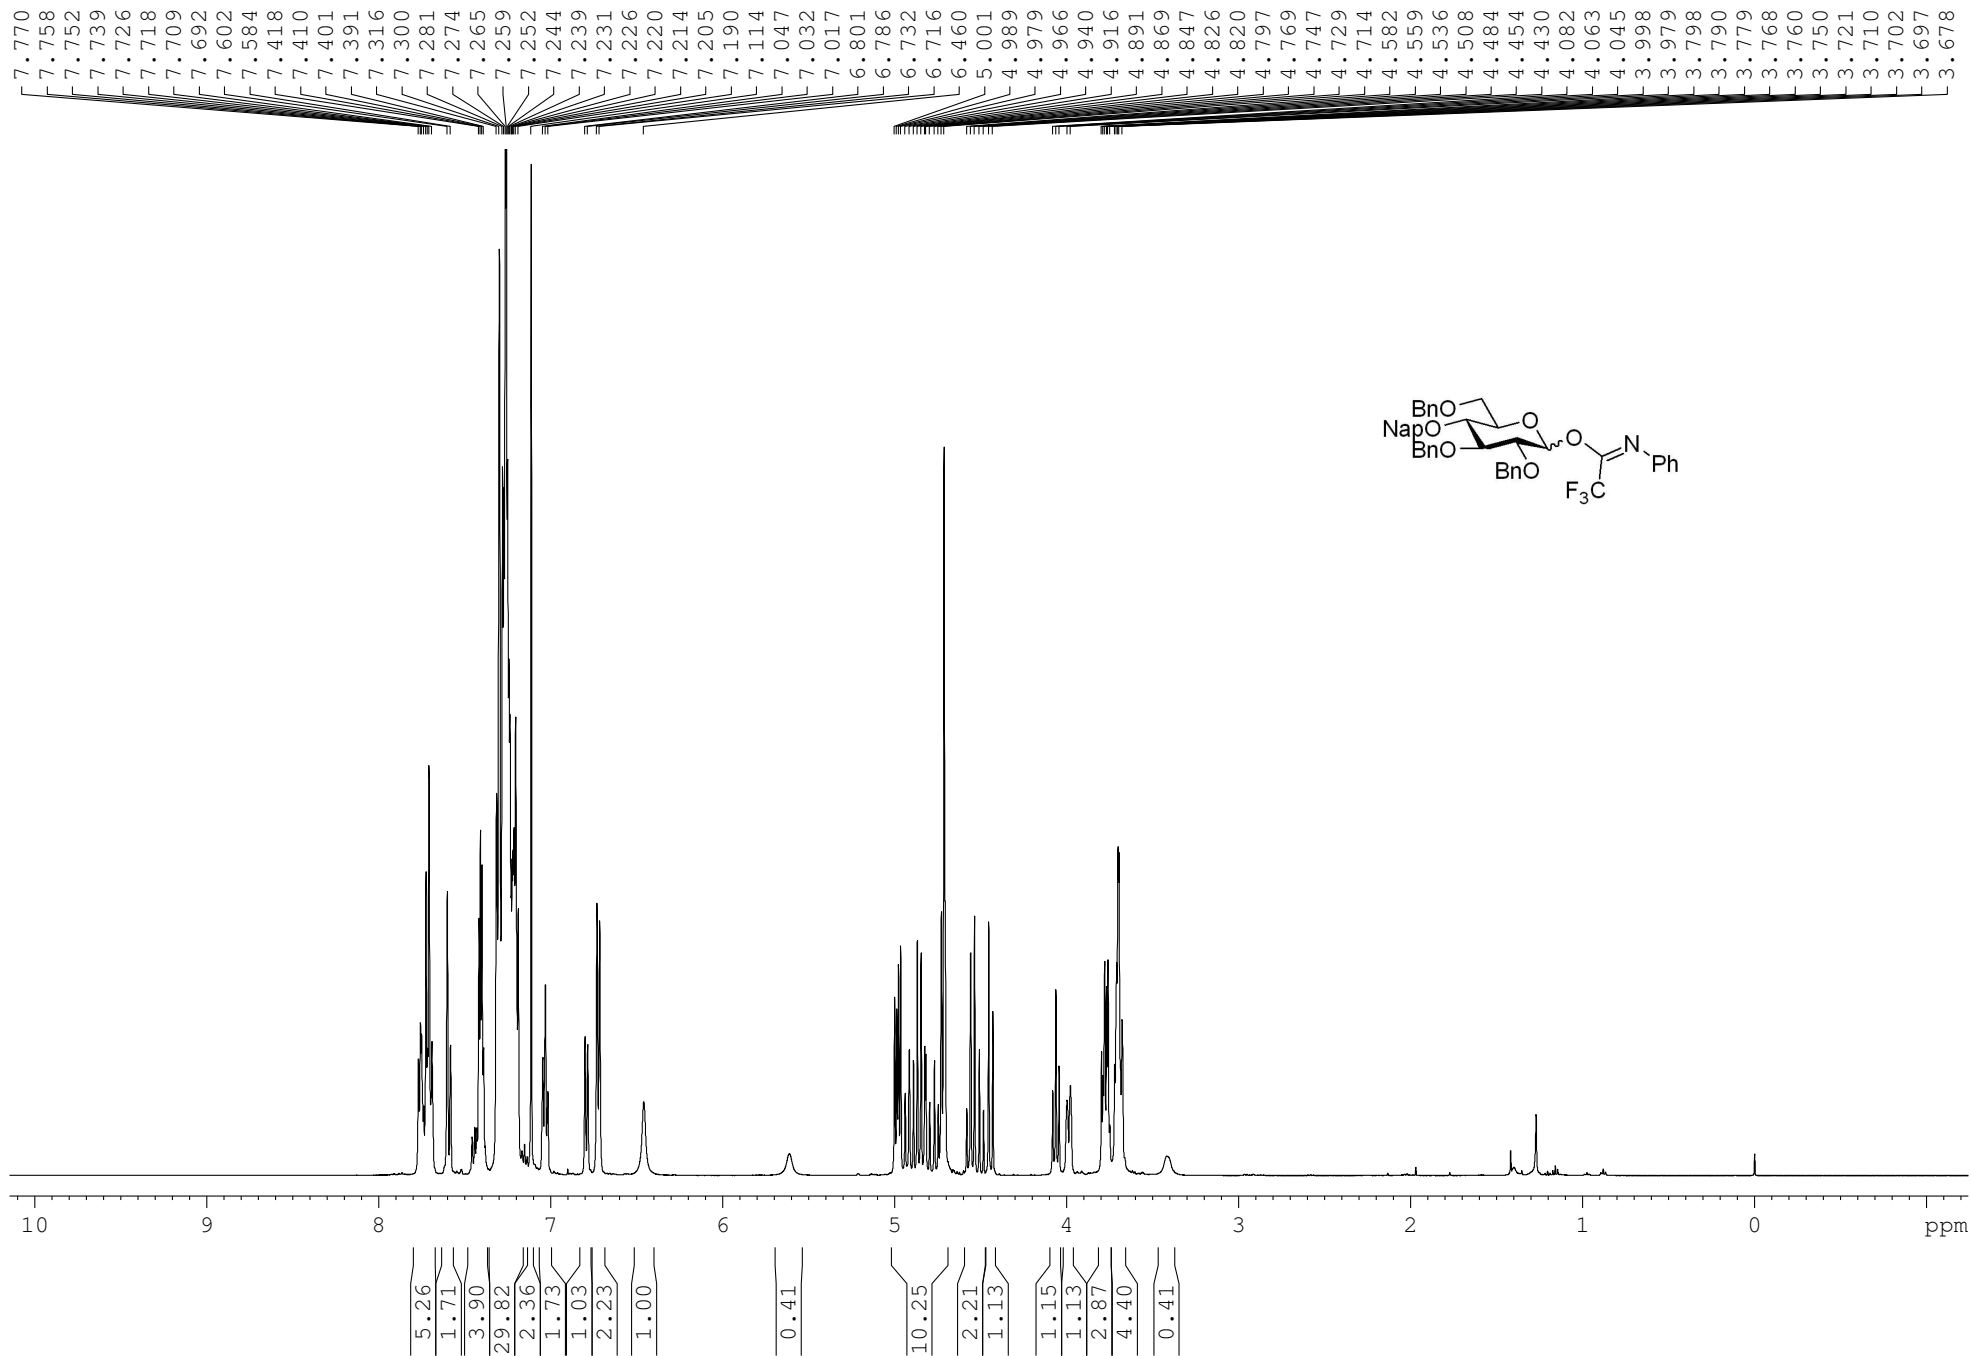

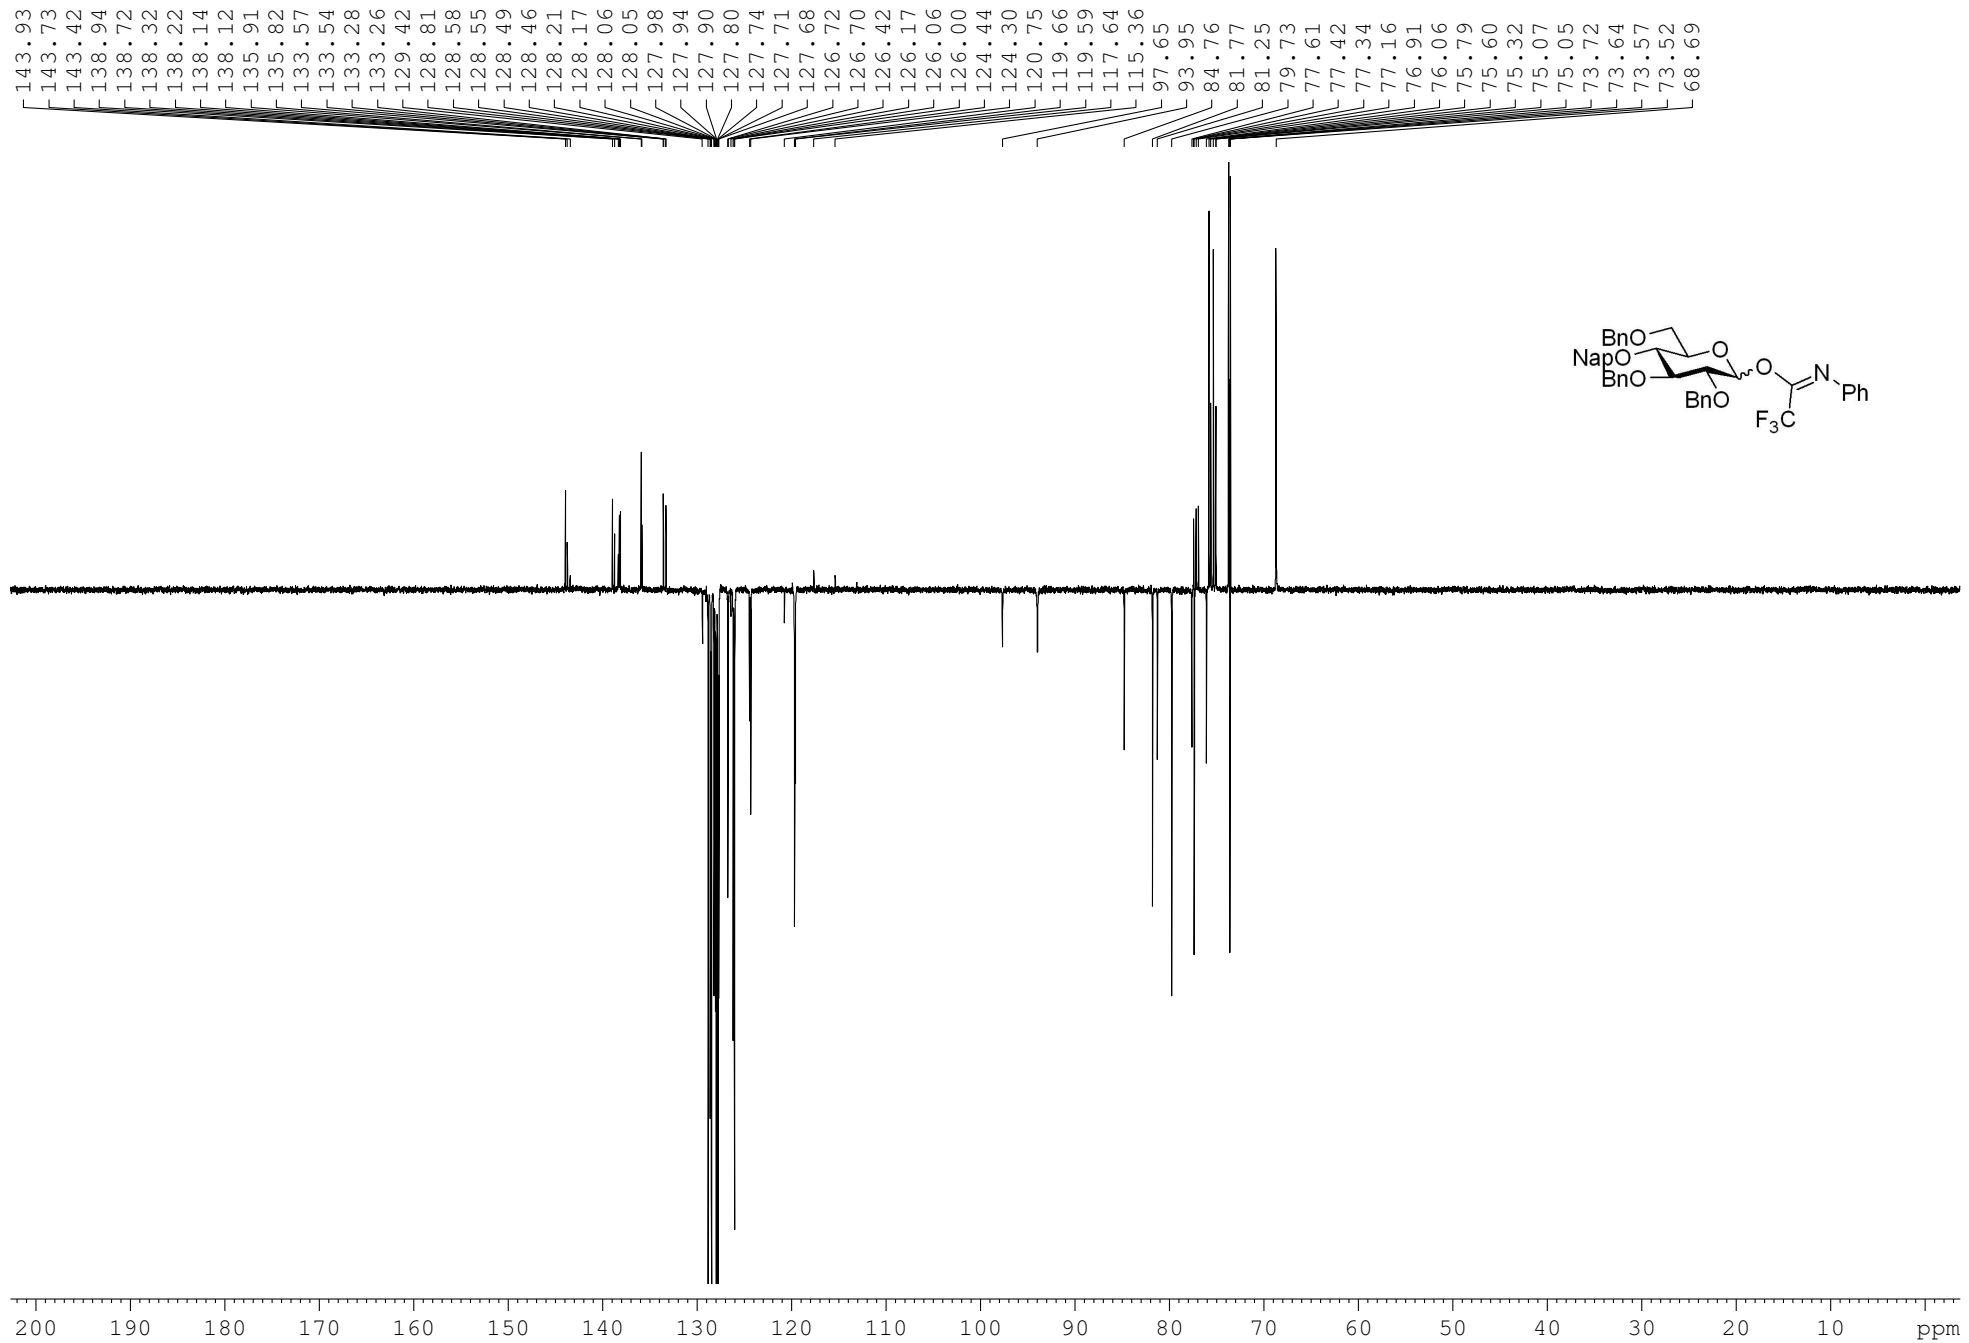

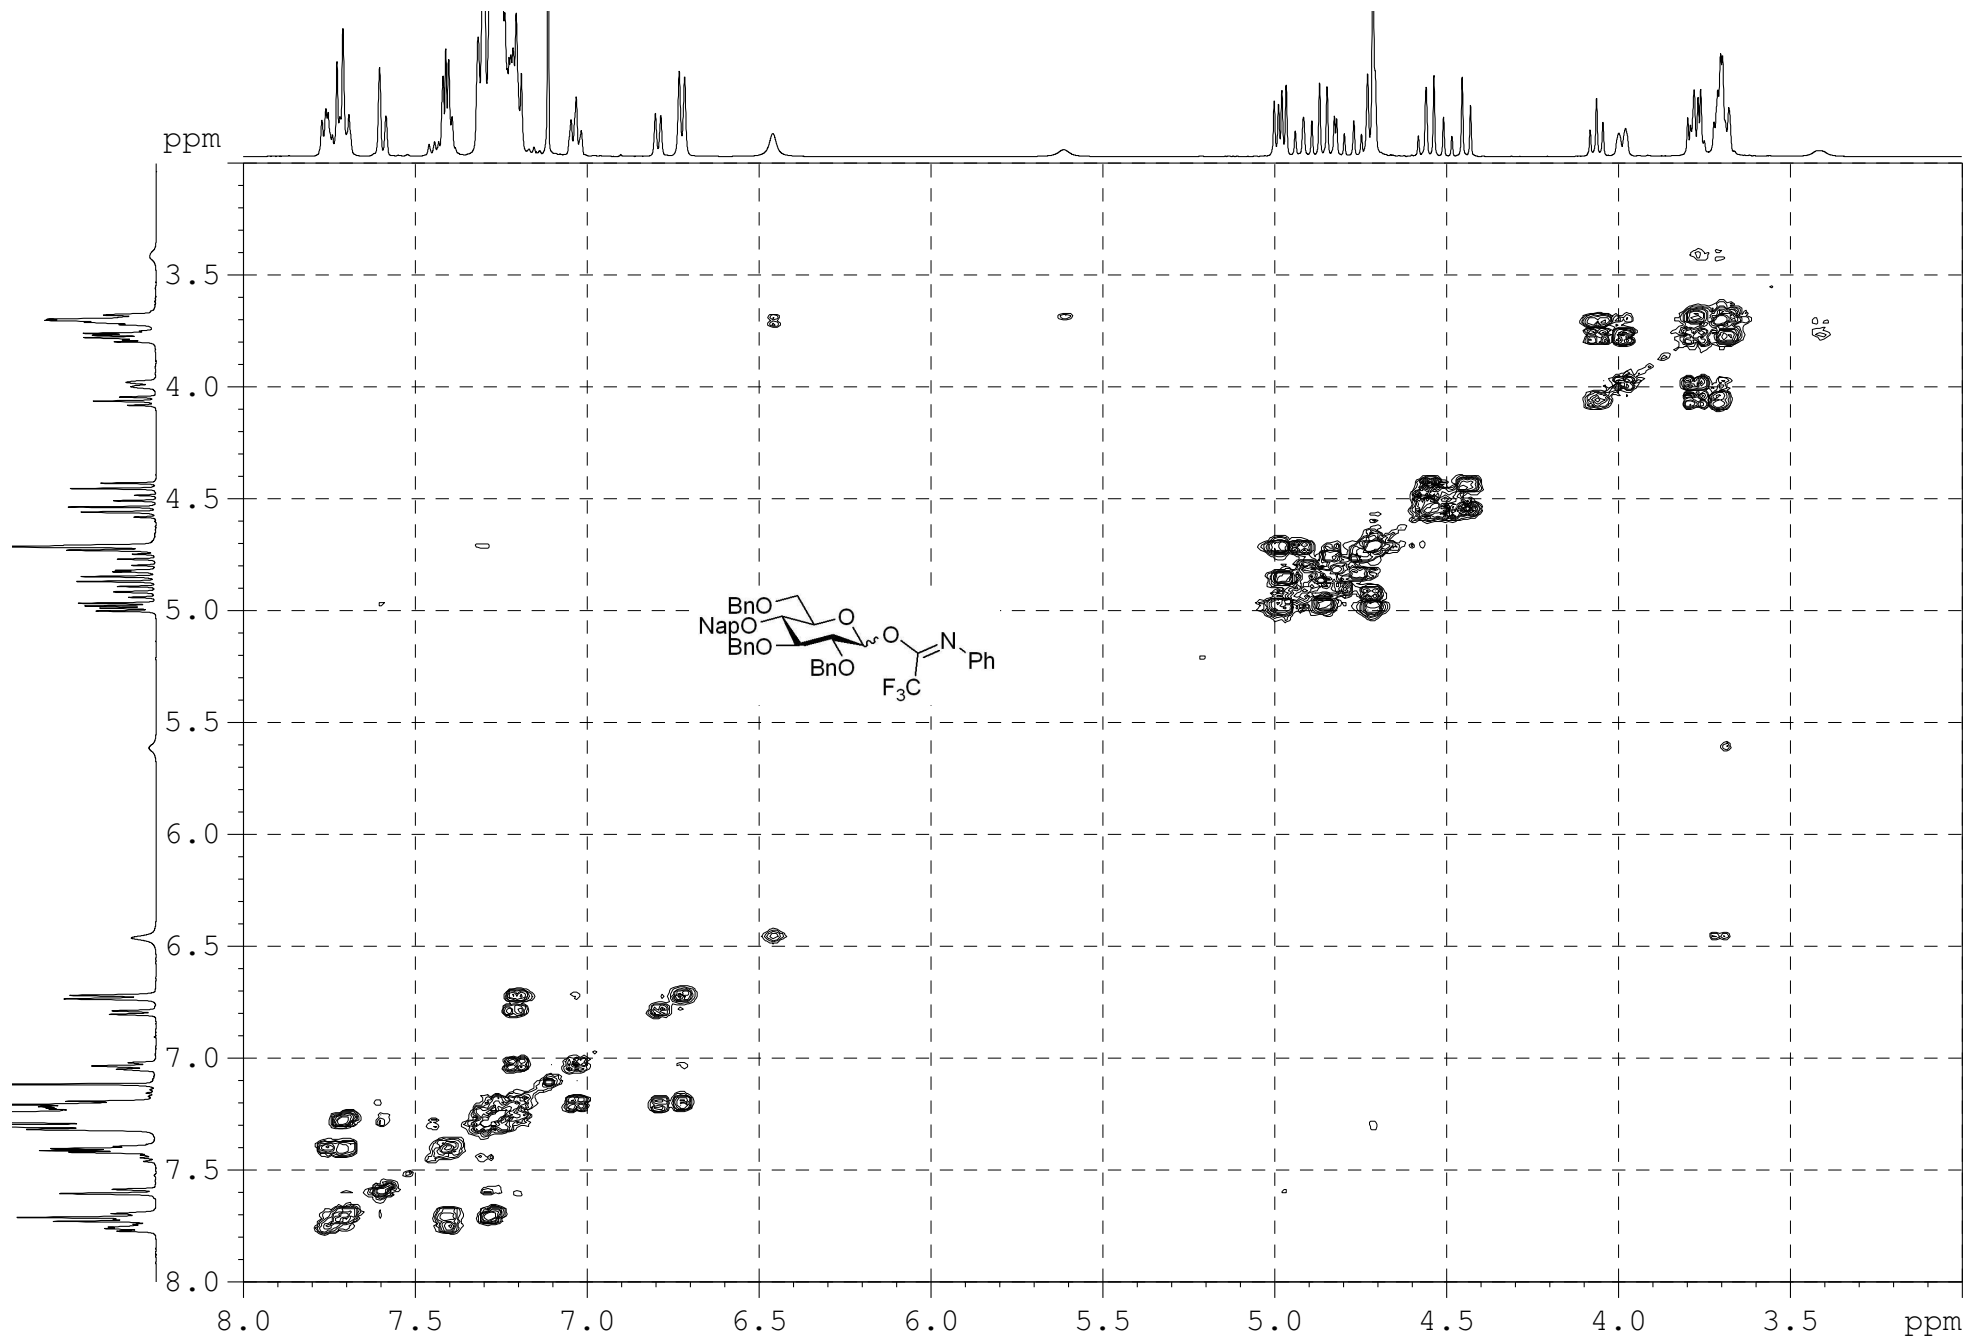

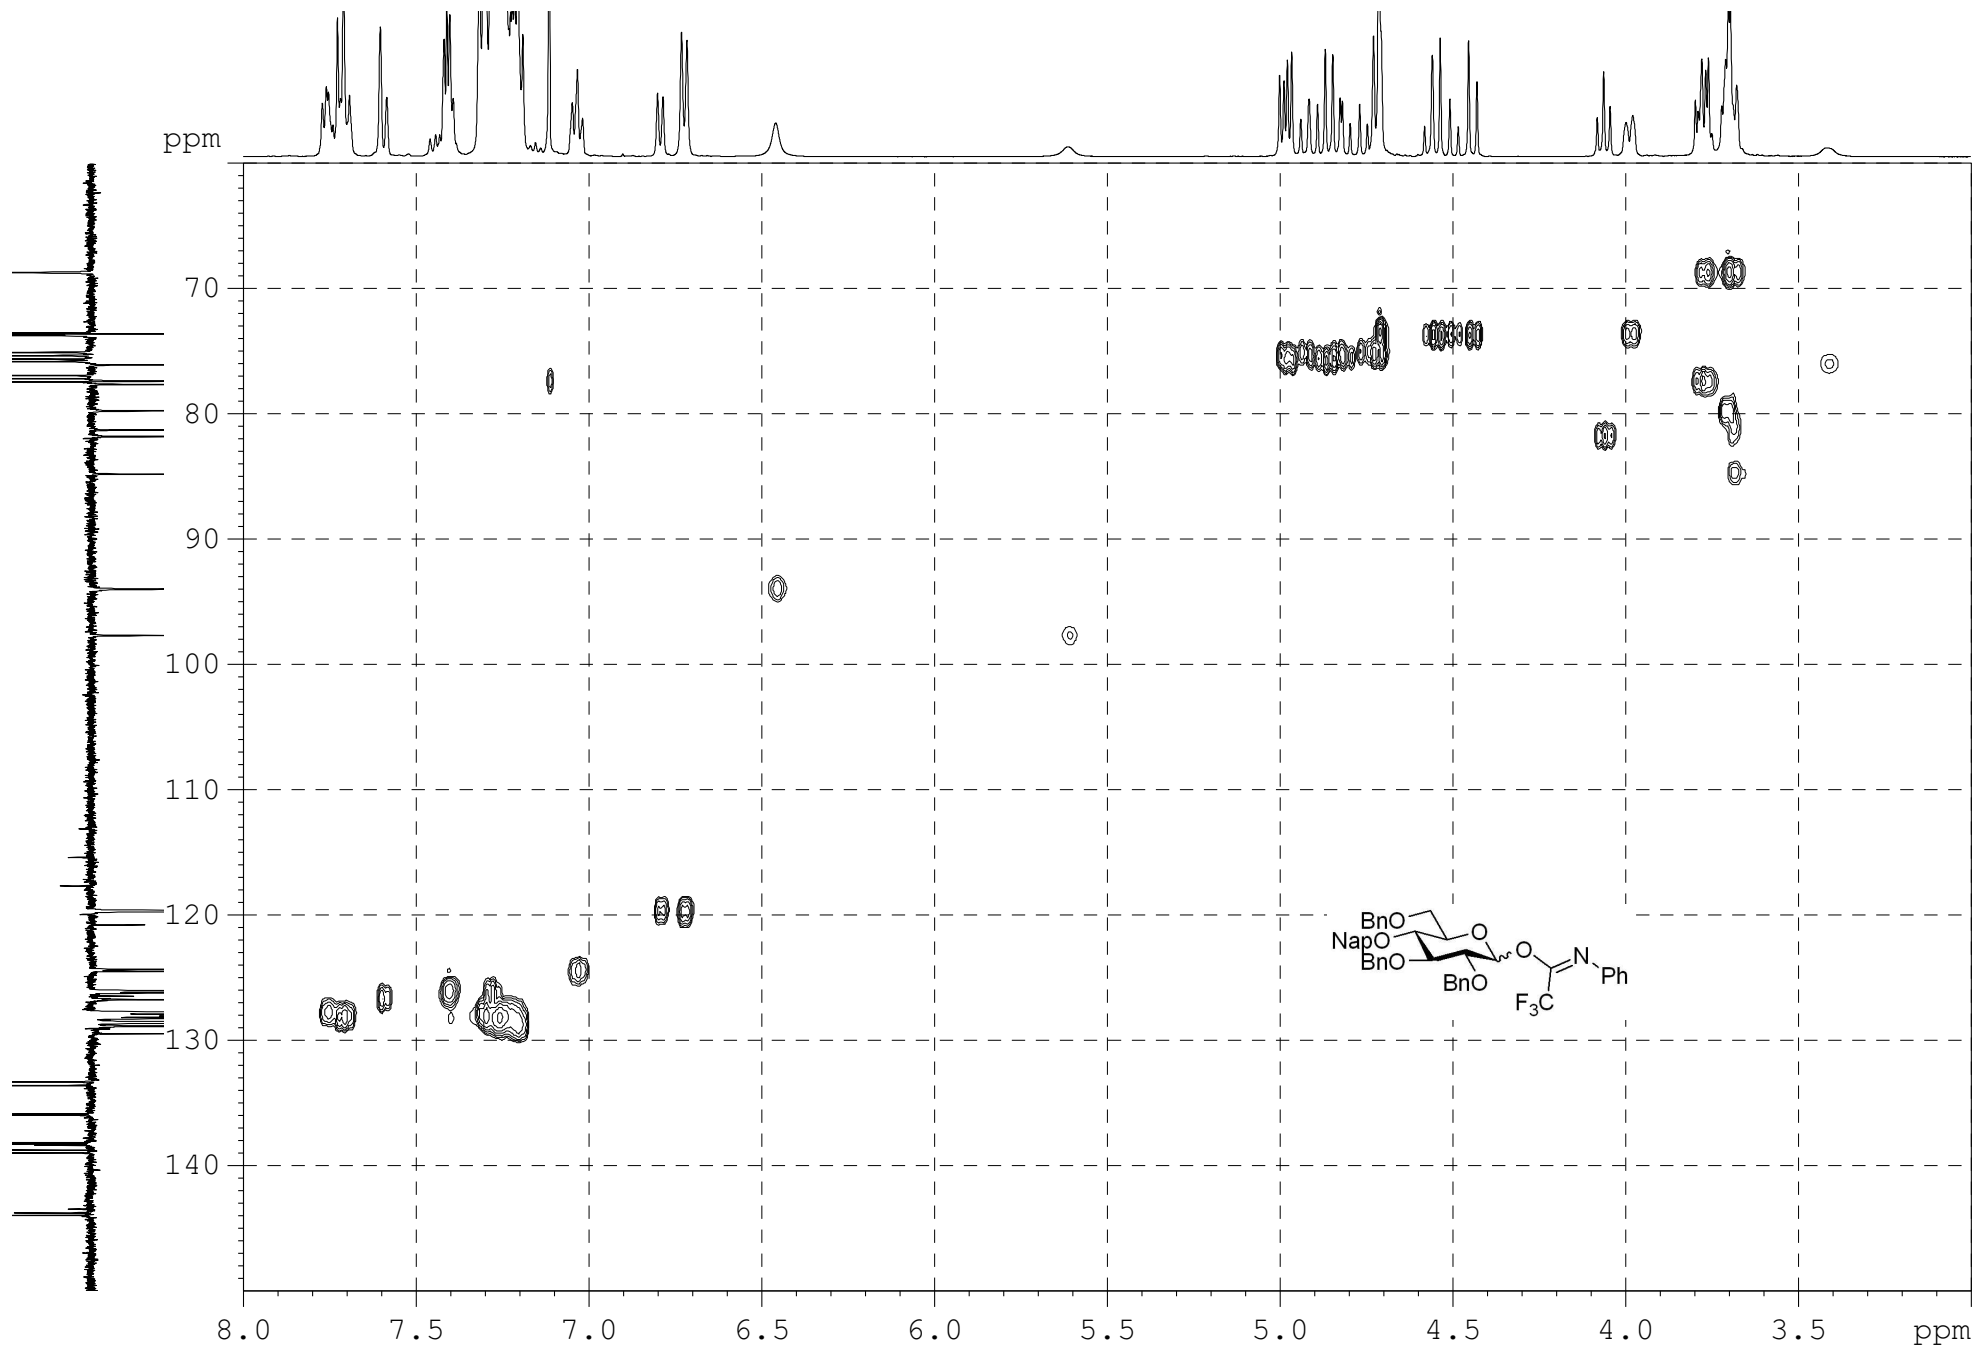







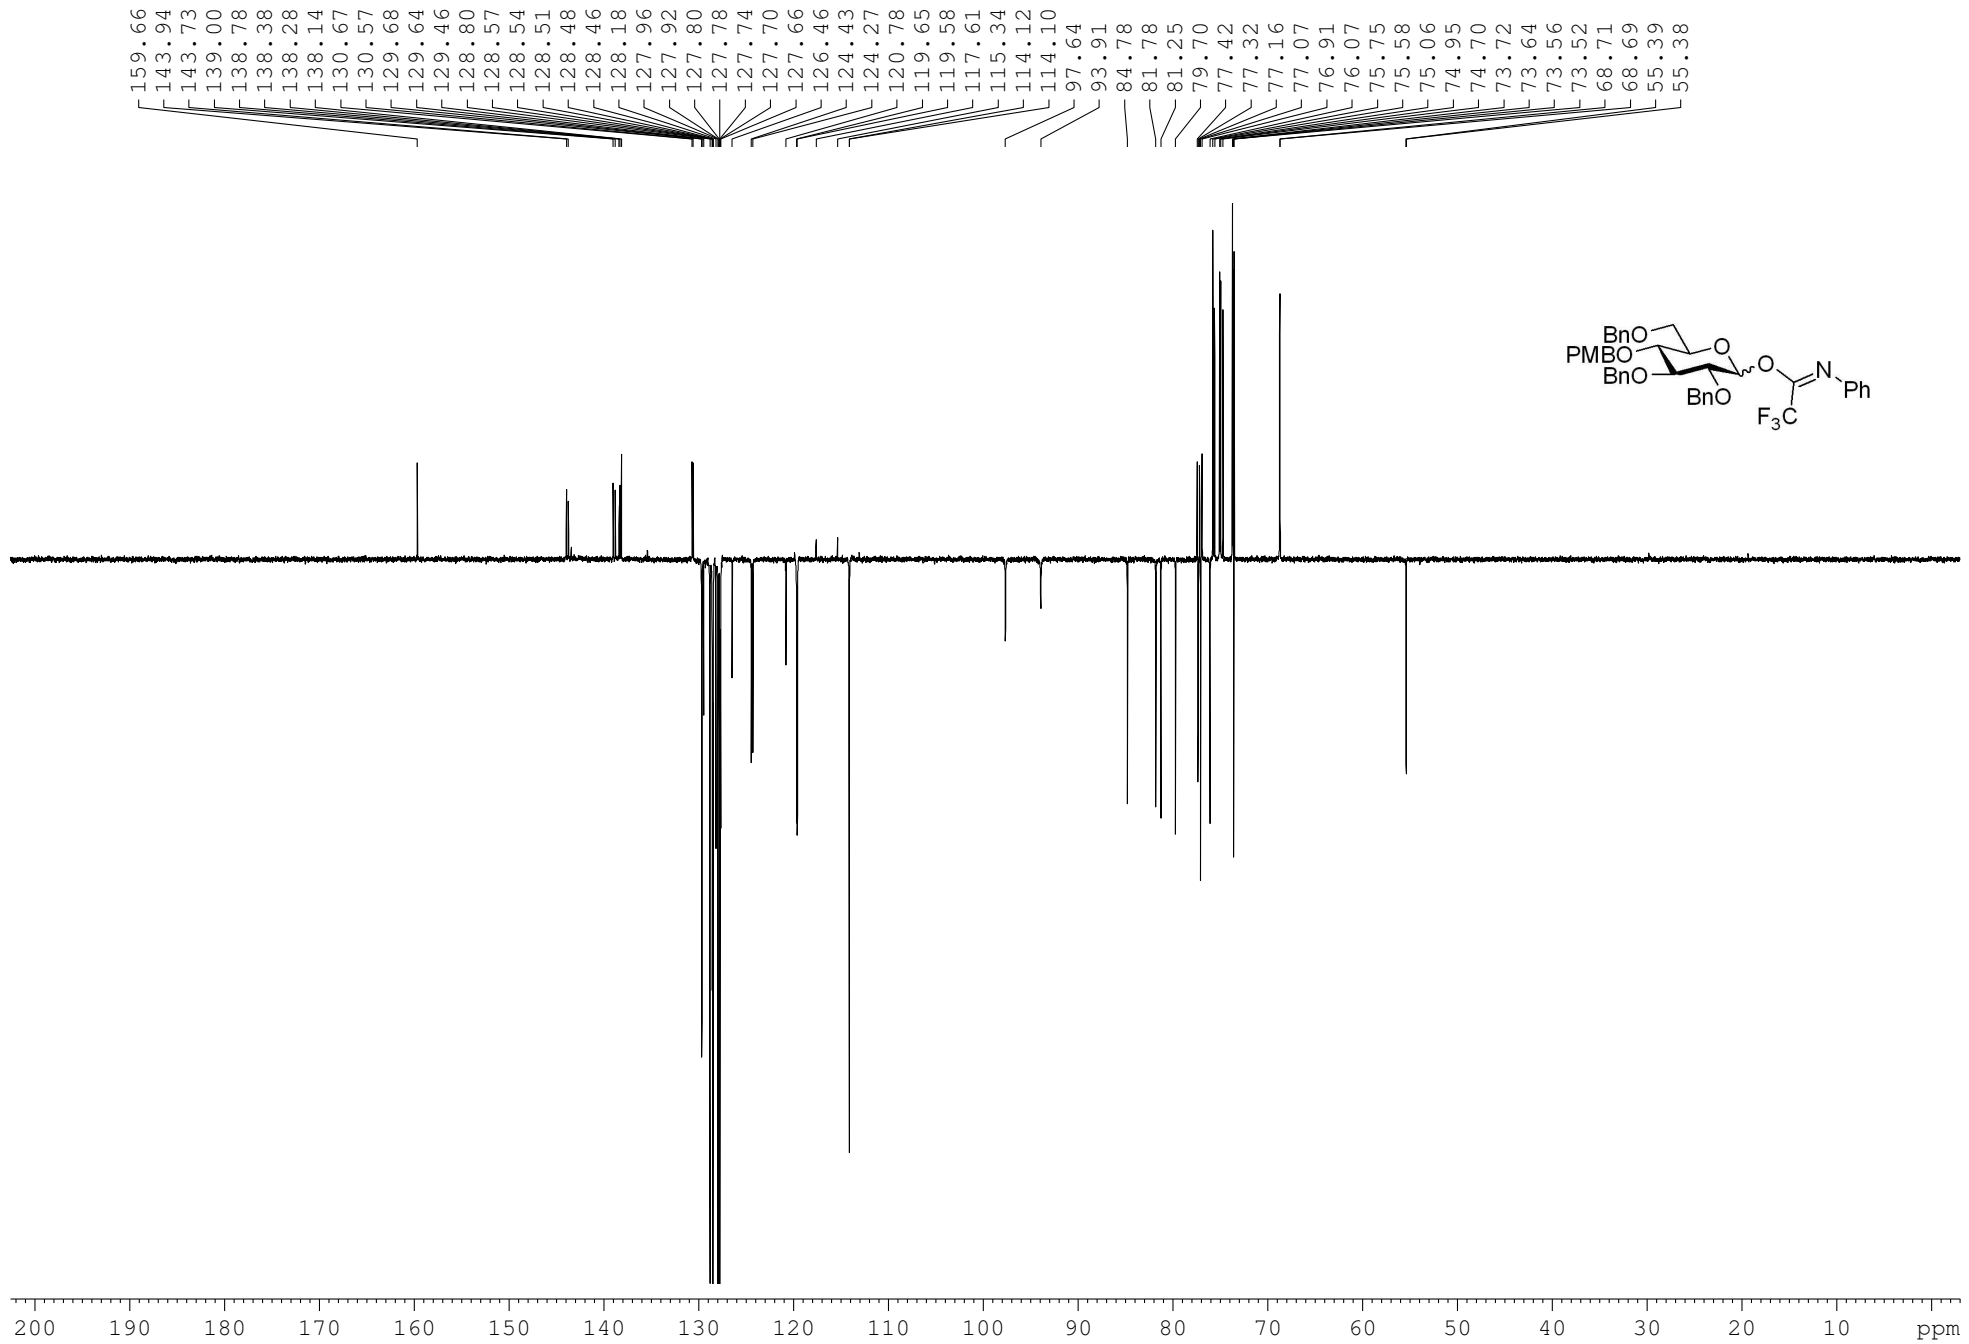

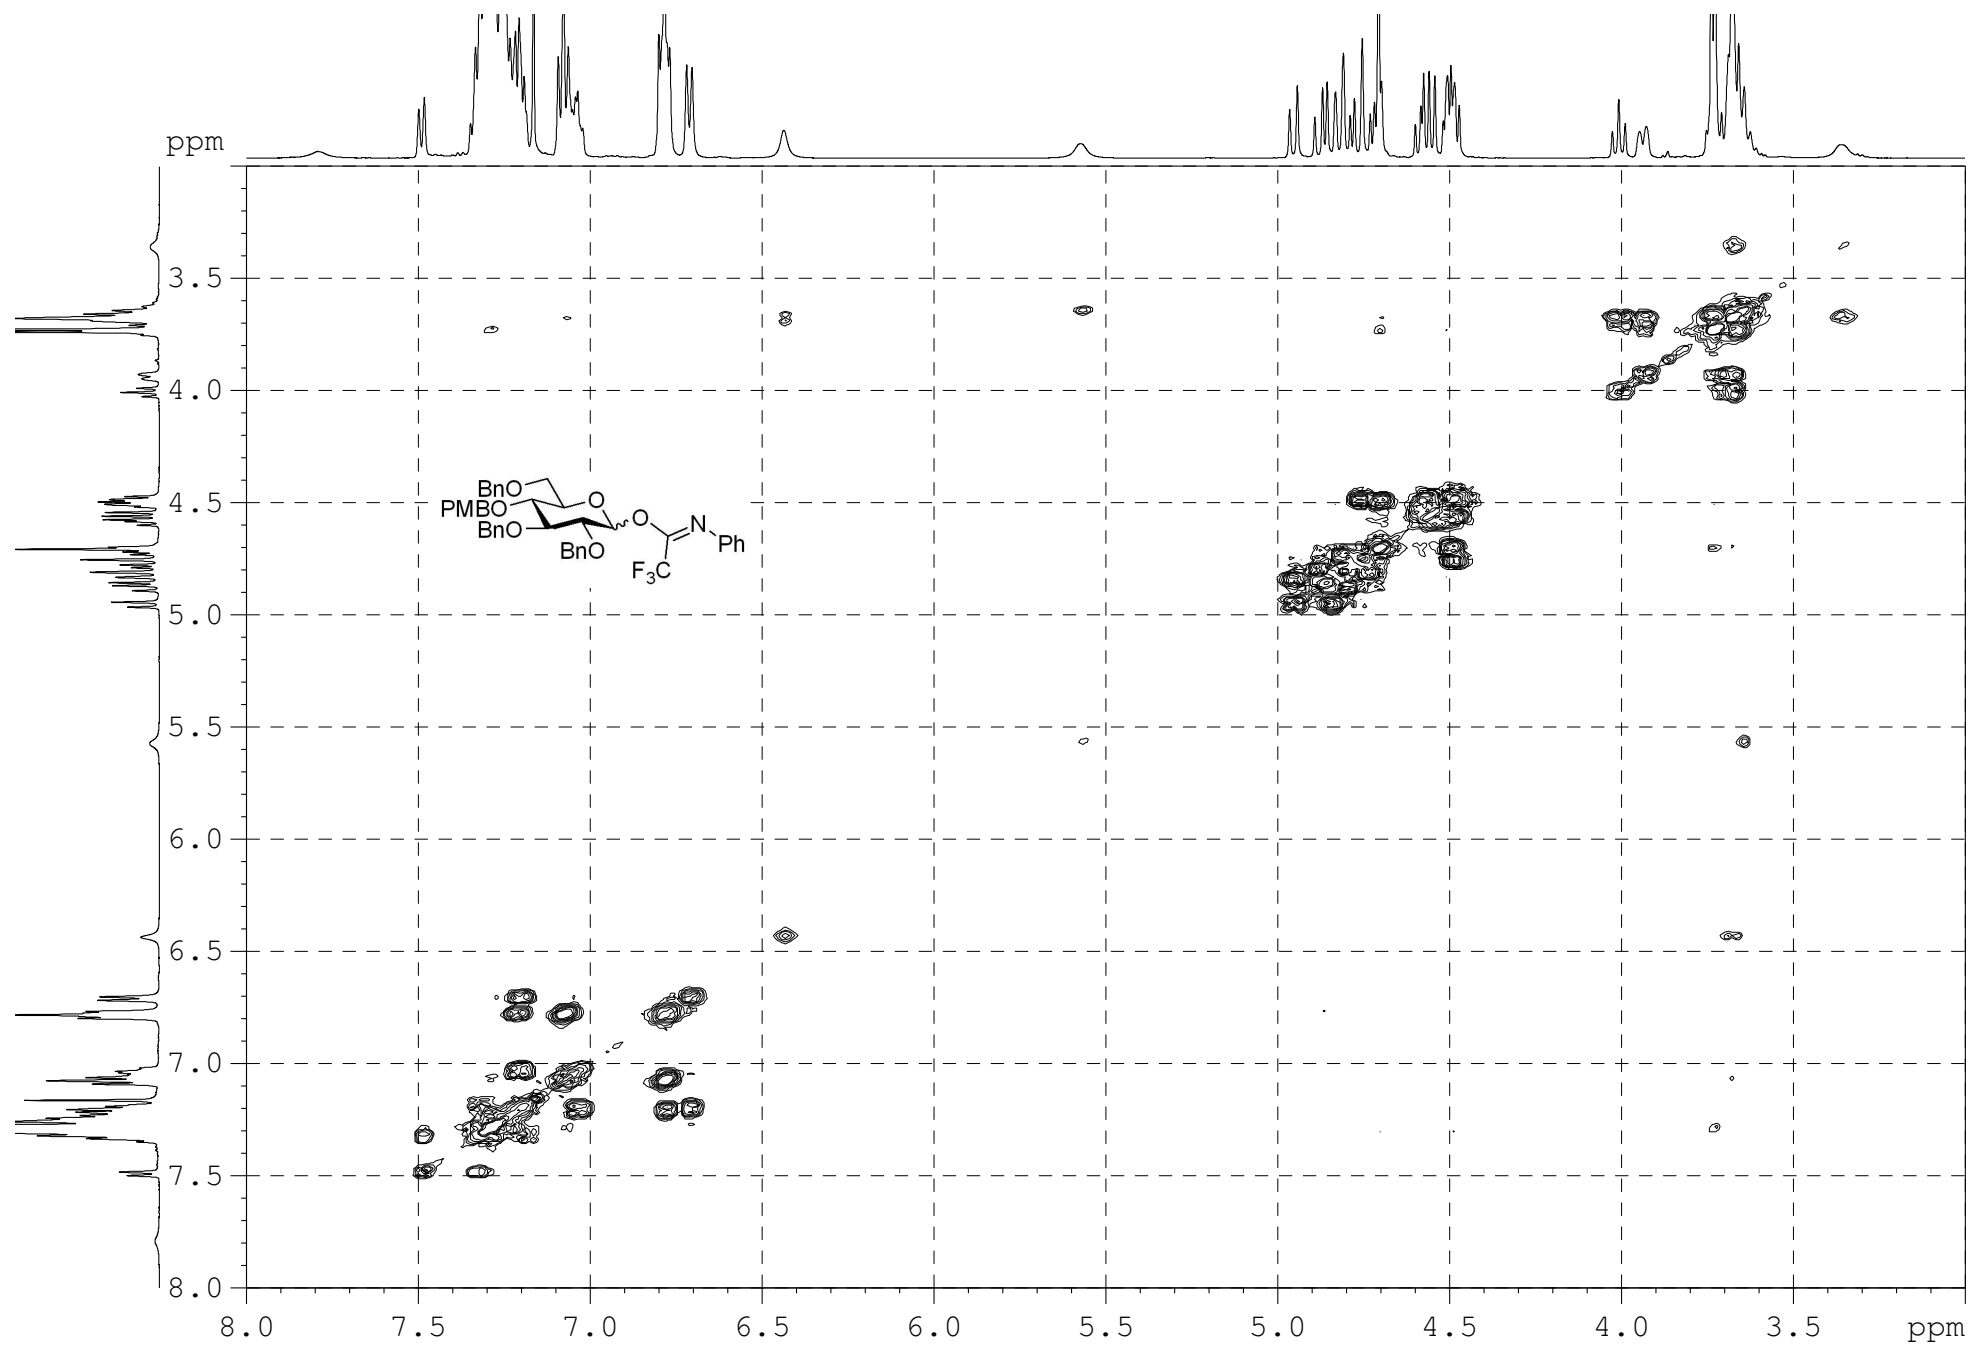

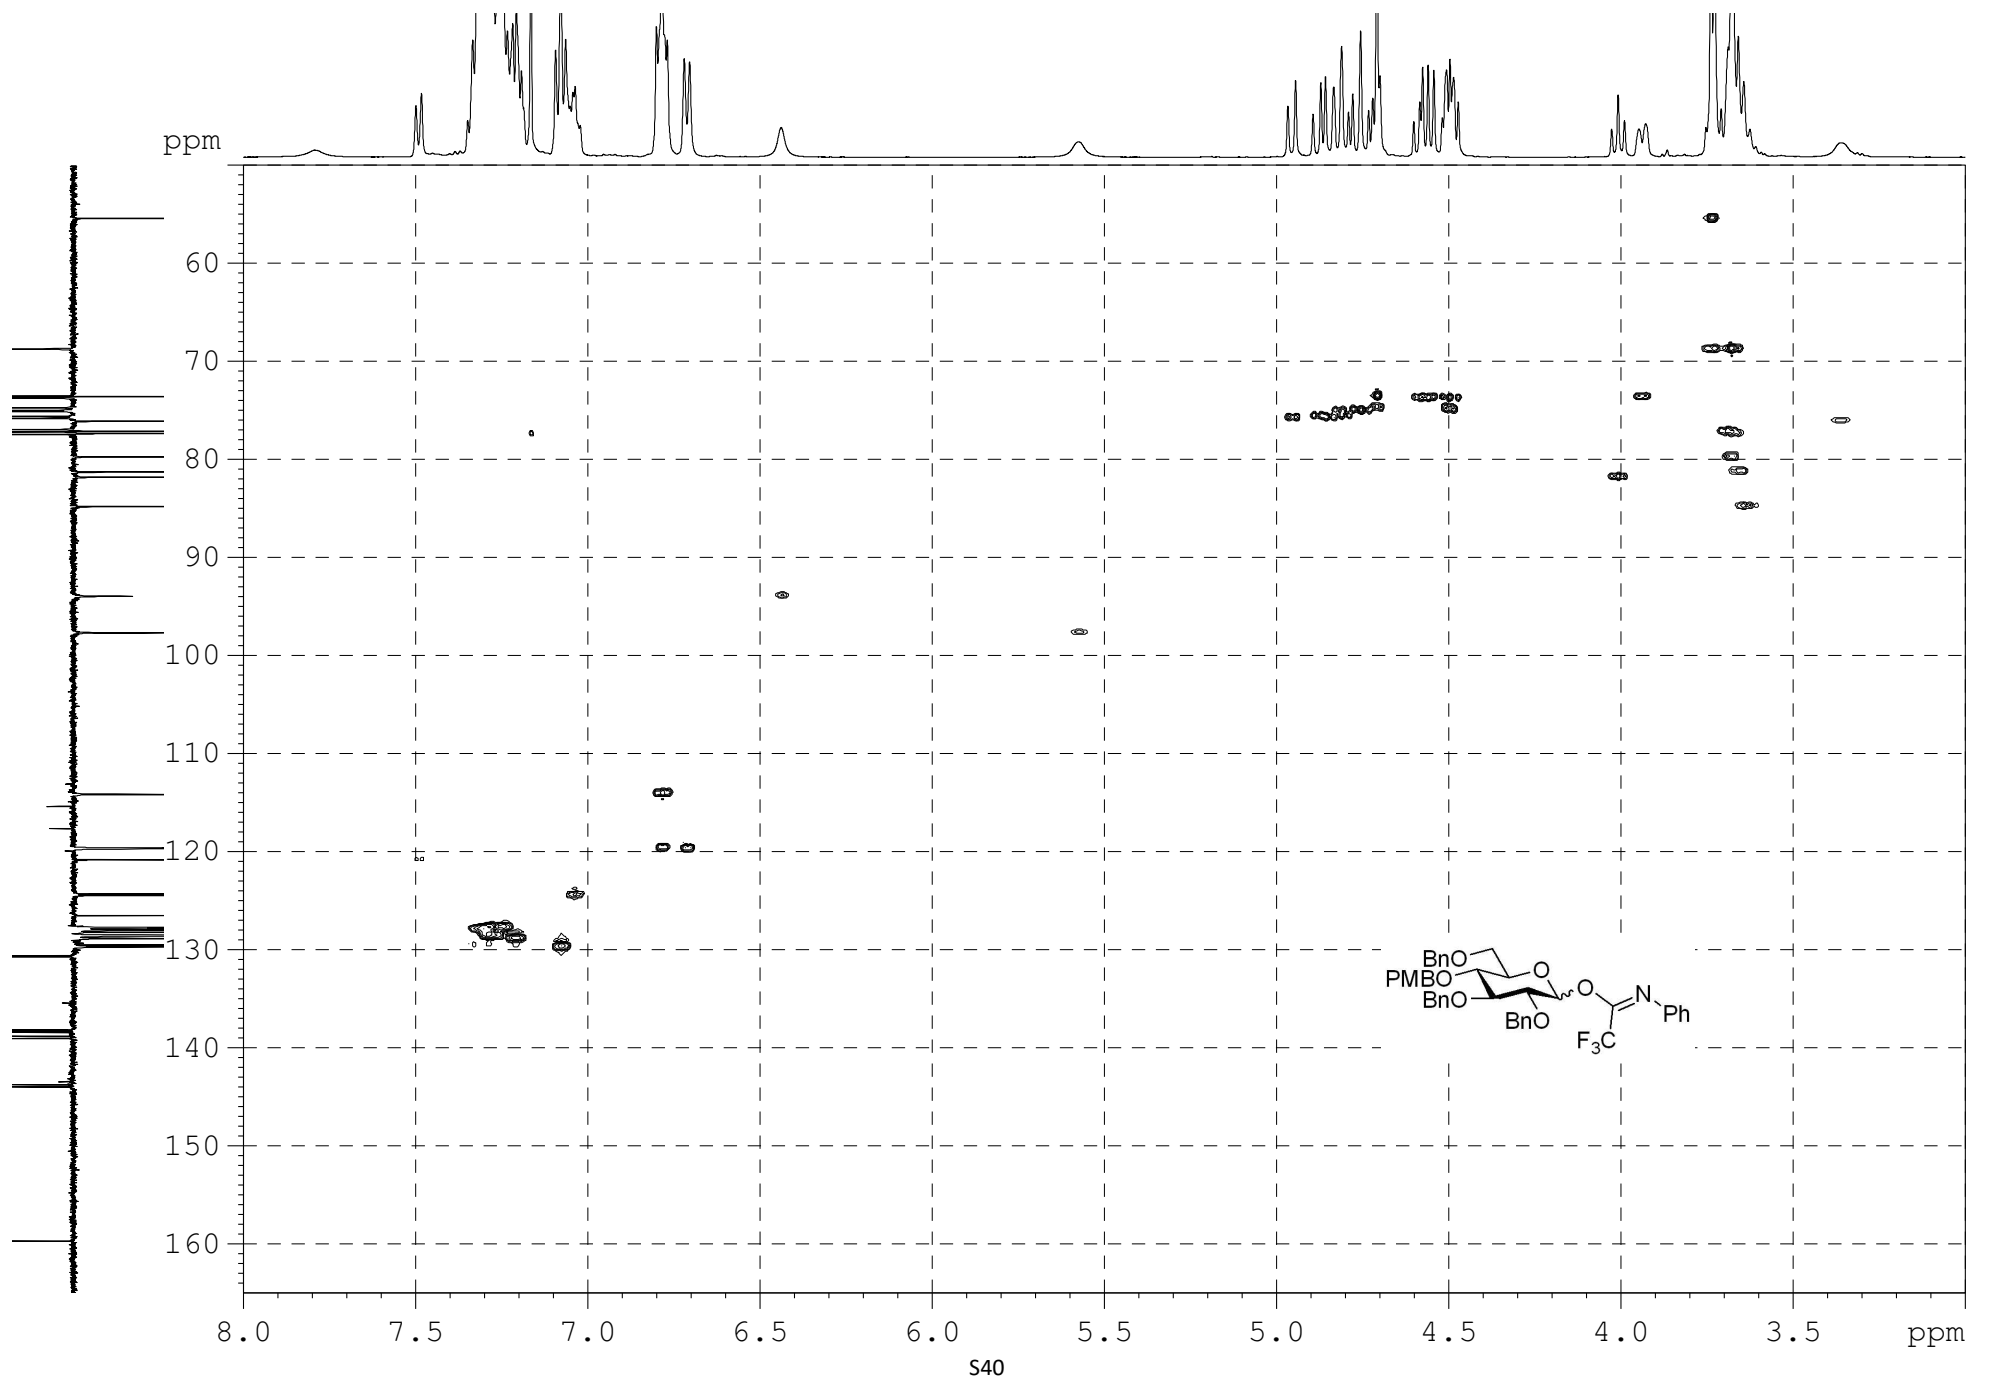

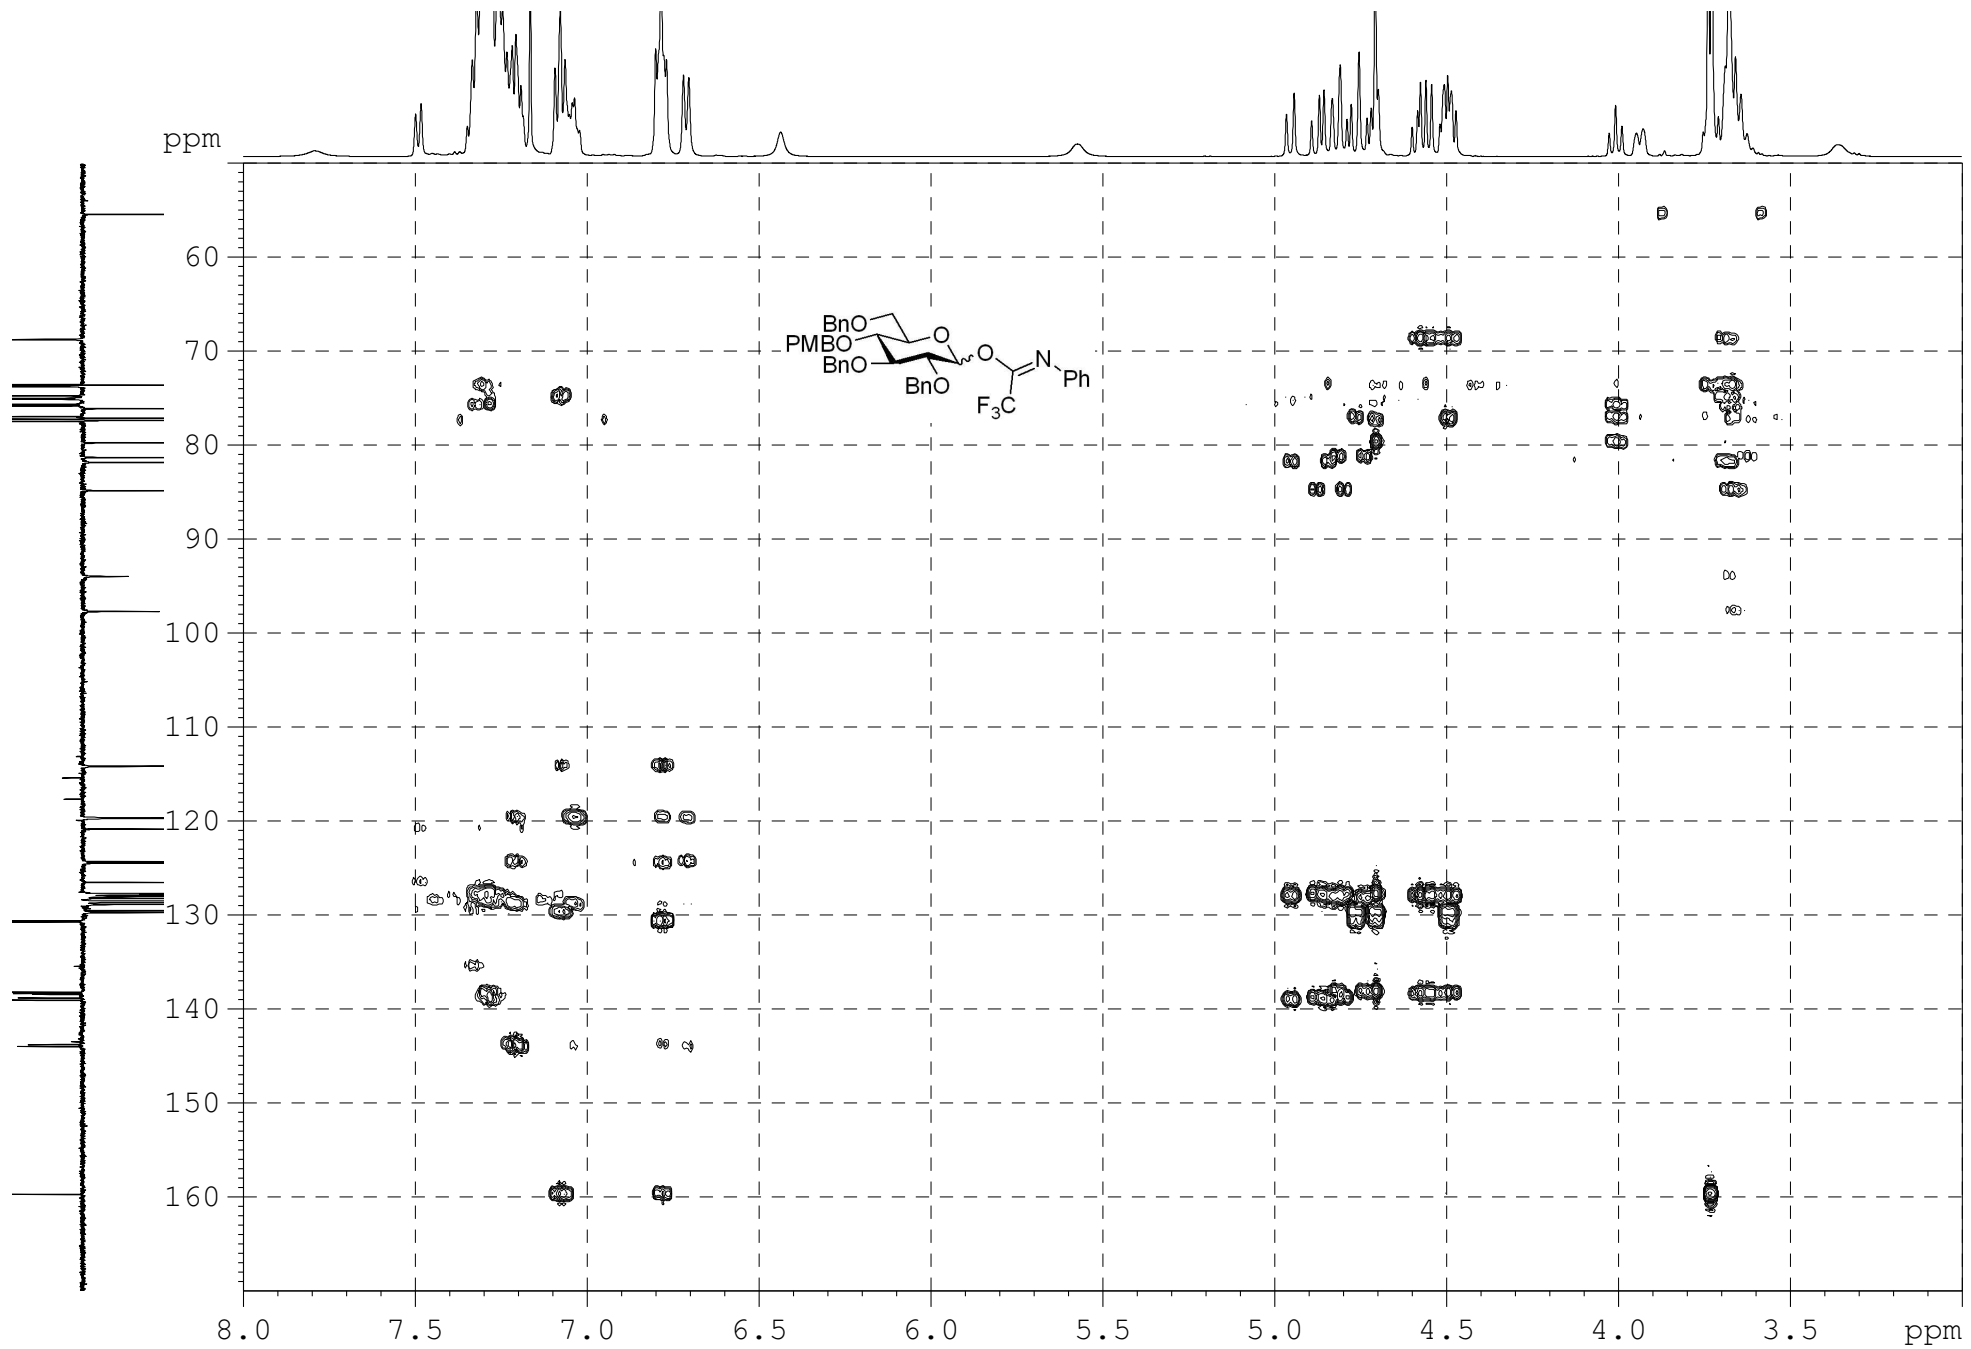

$^1\text{H-NMR}$ ,  $^{13}\text{C-APT}$ ,  $^1\text{H-}^1\text{H COSY}$ , HSQC of 5a

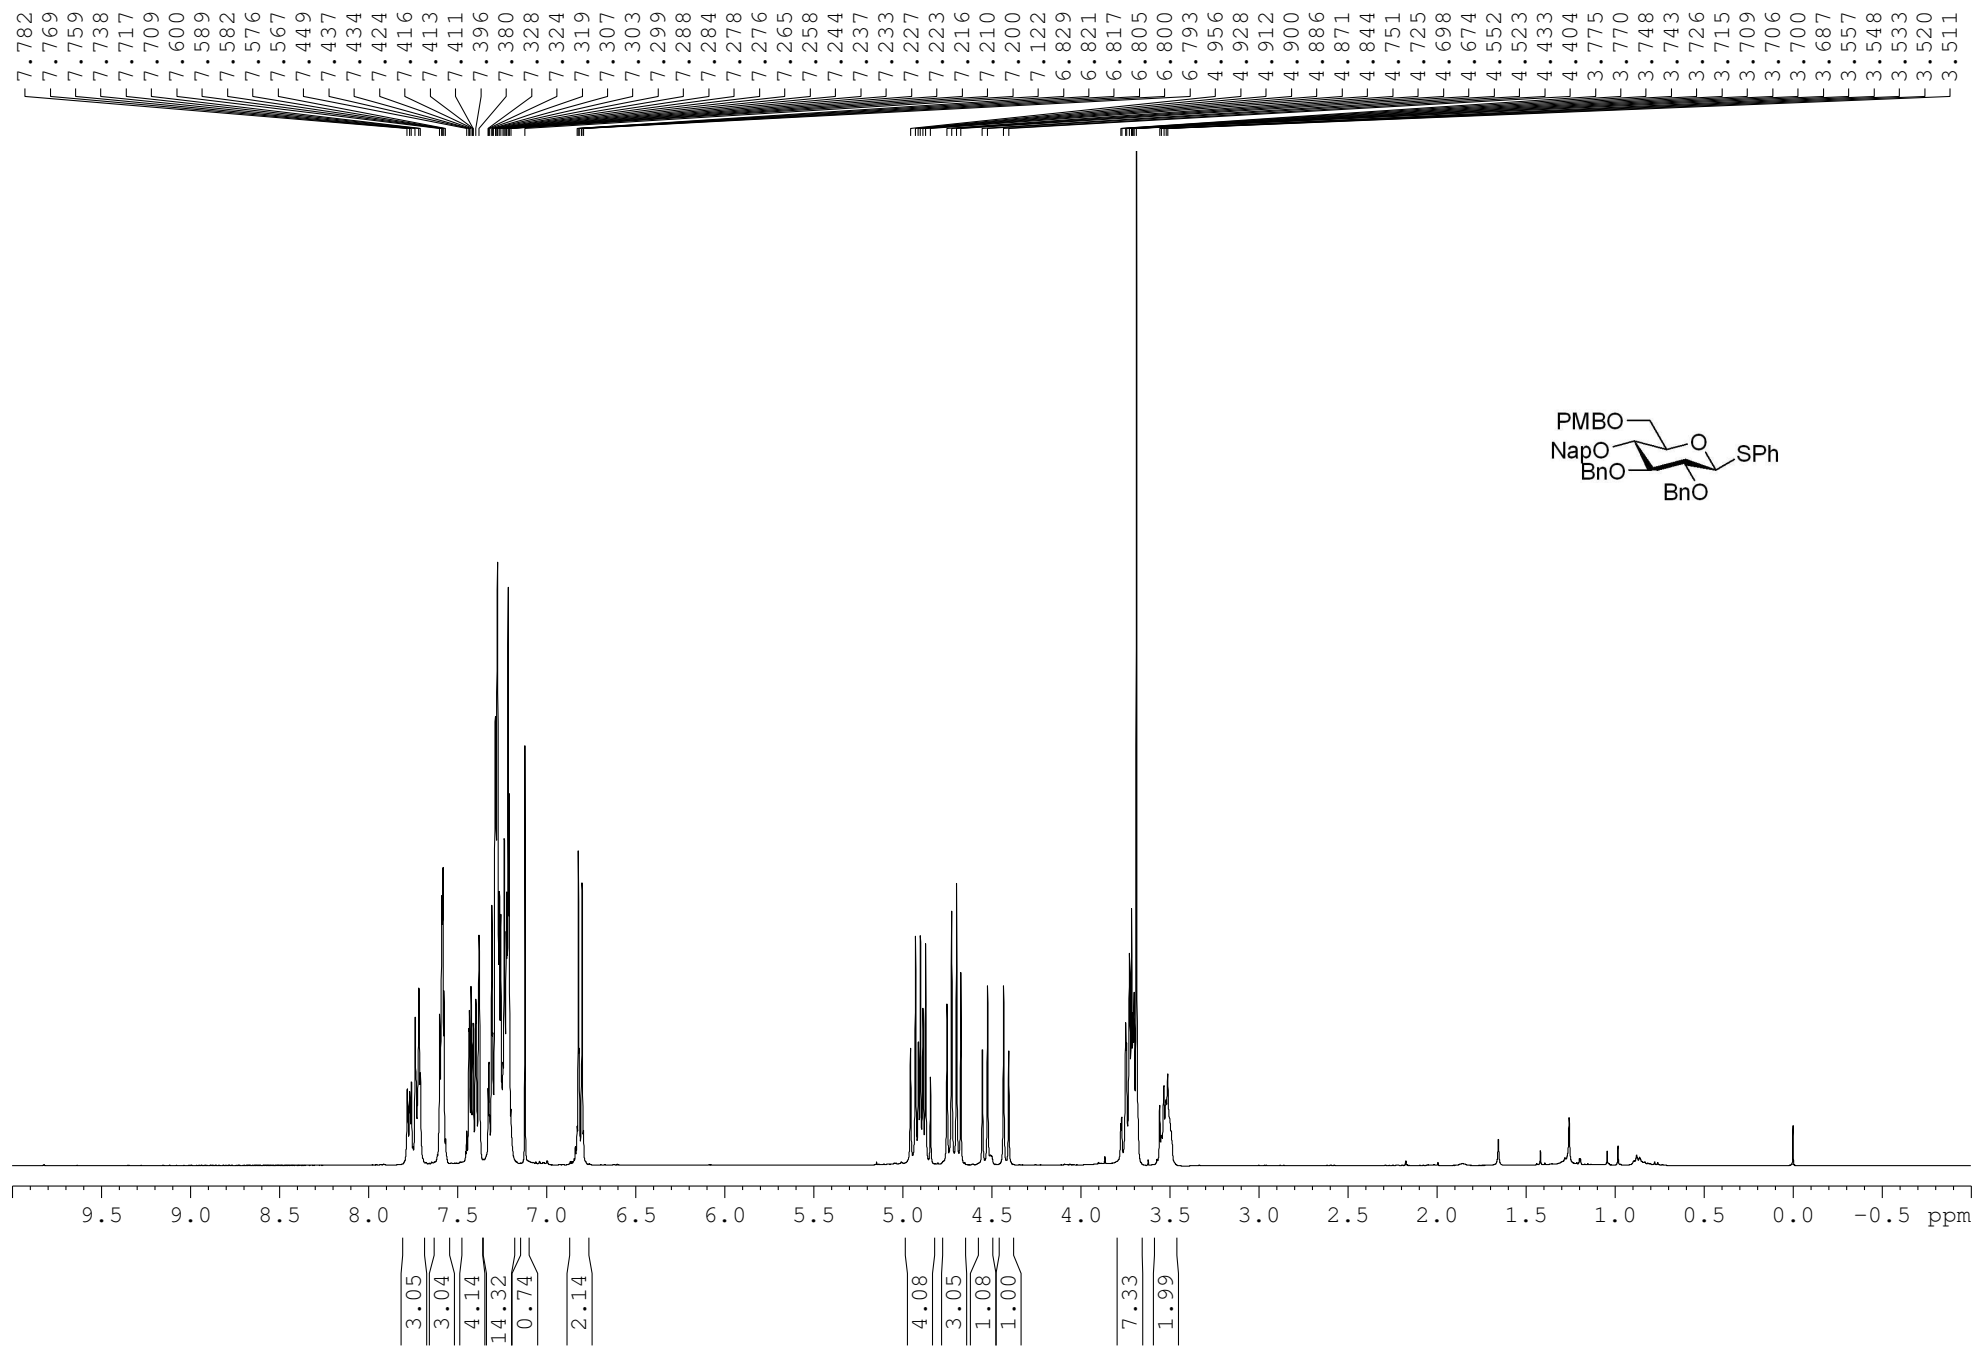

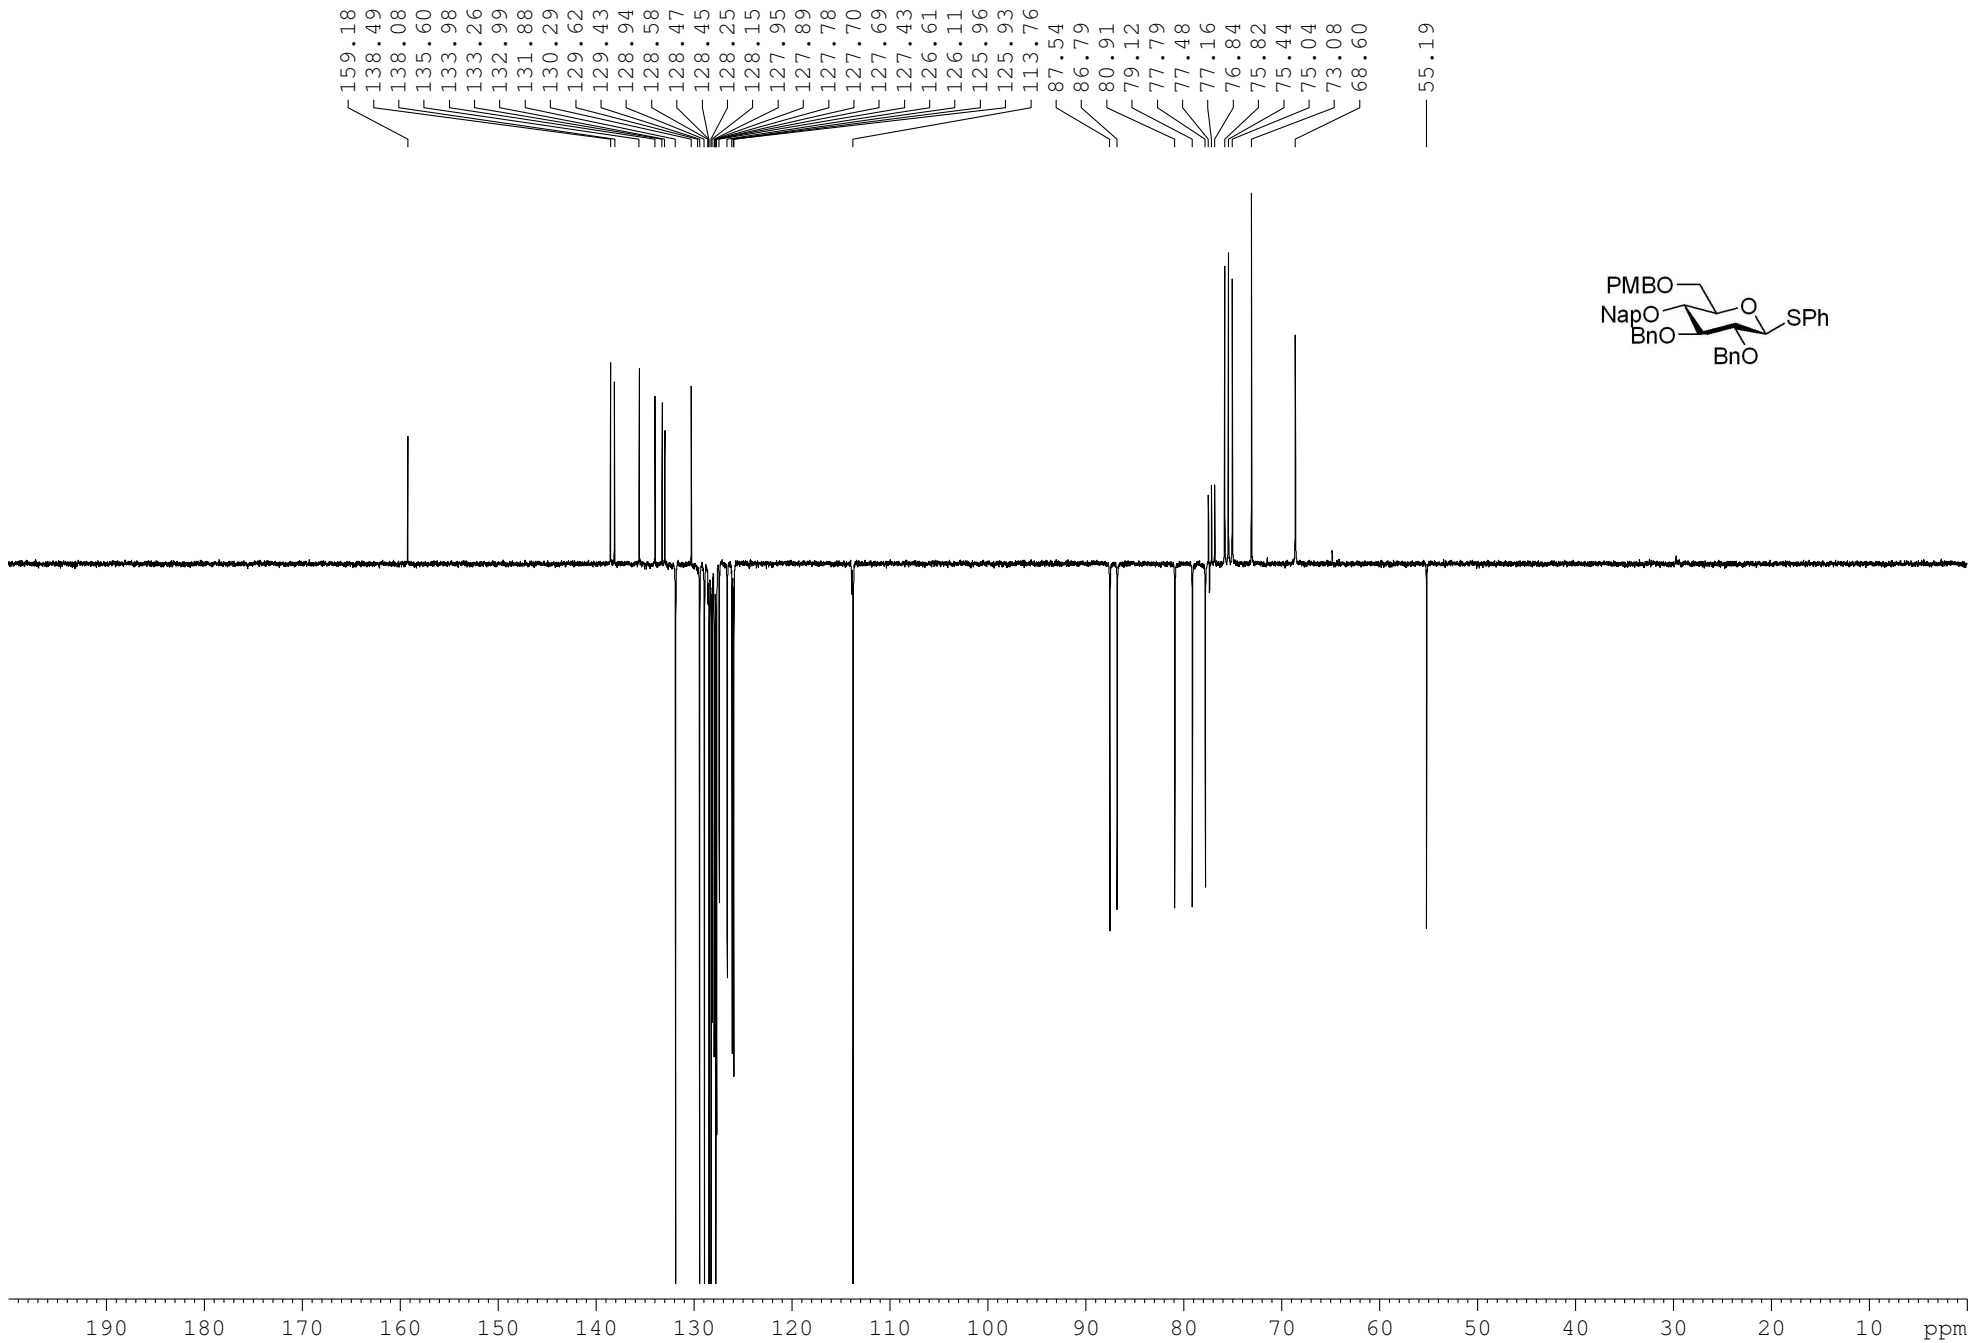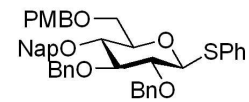





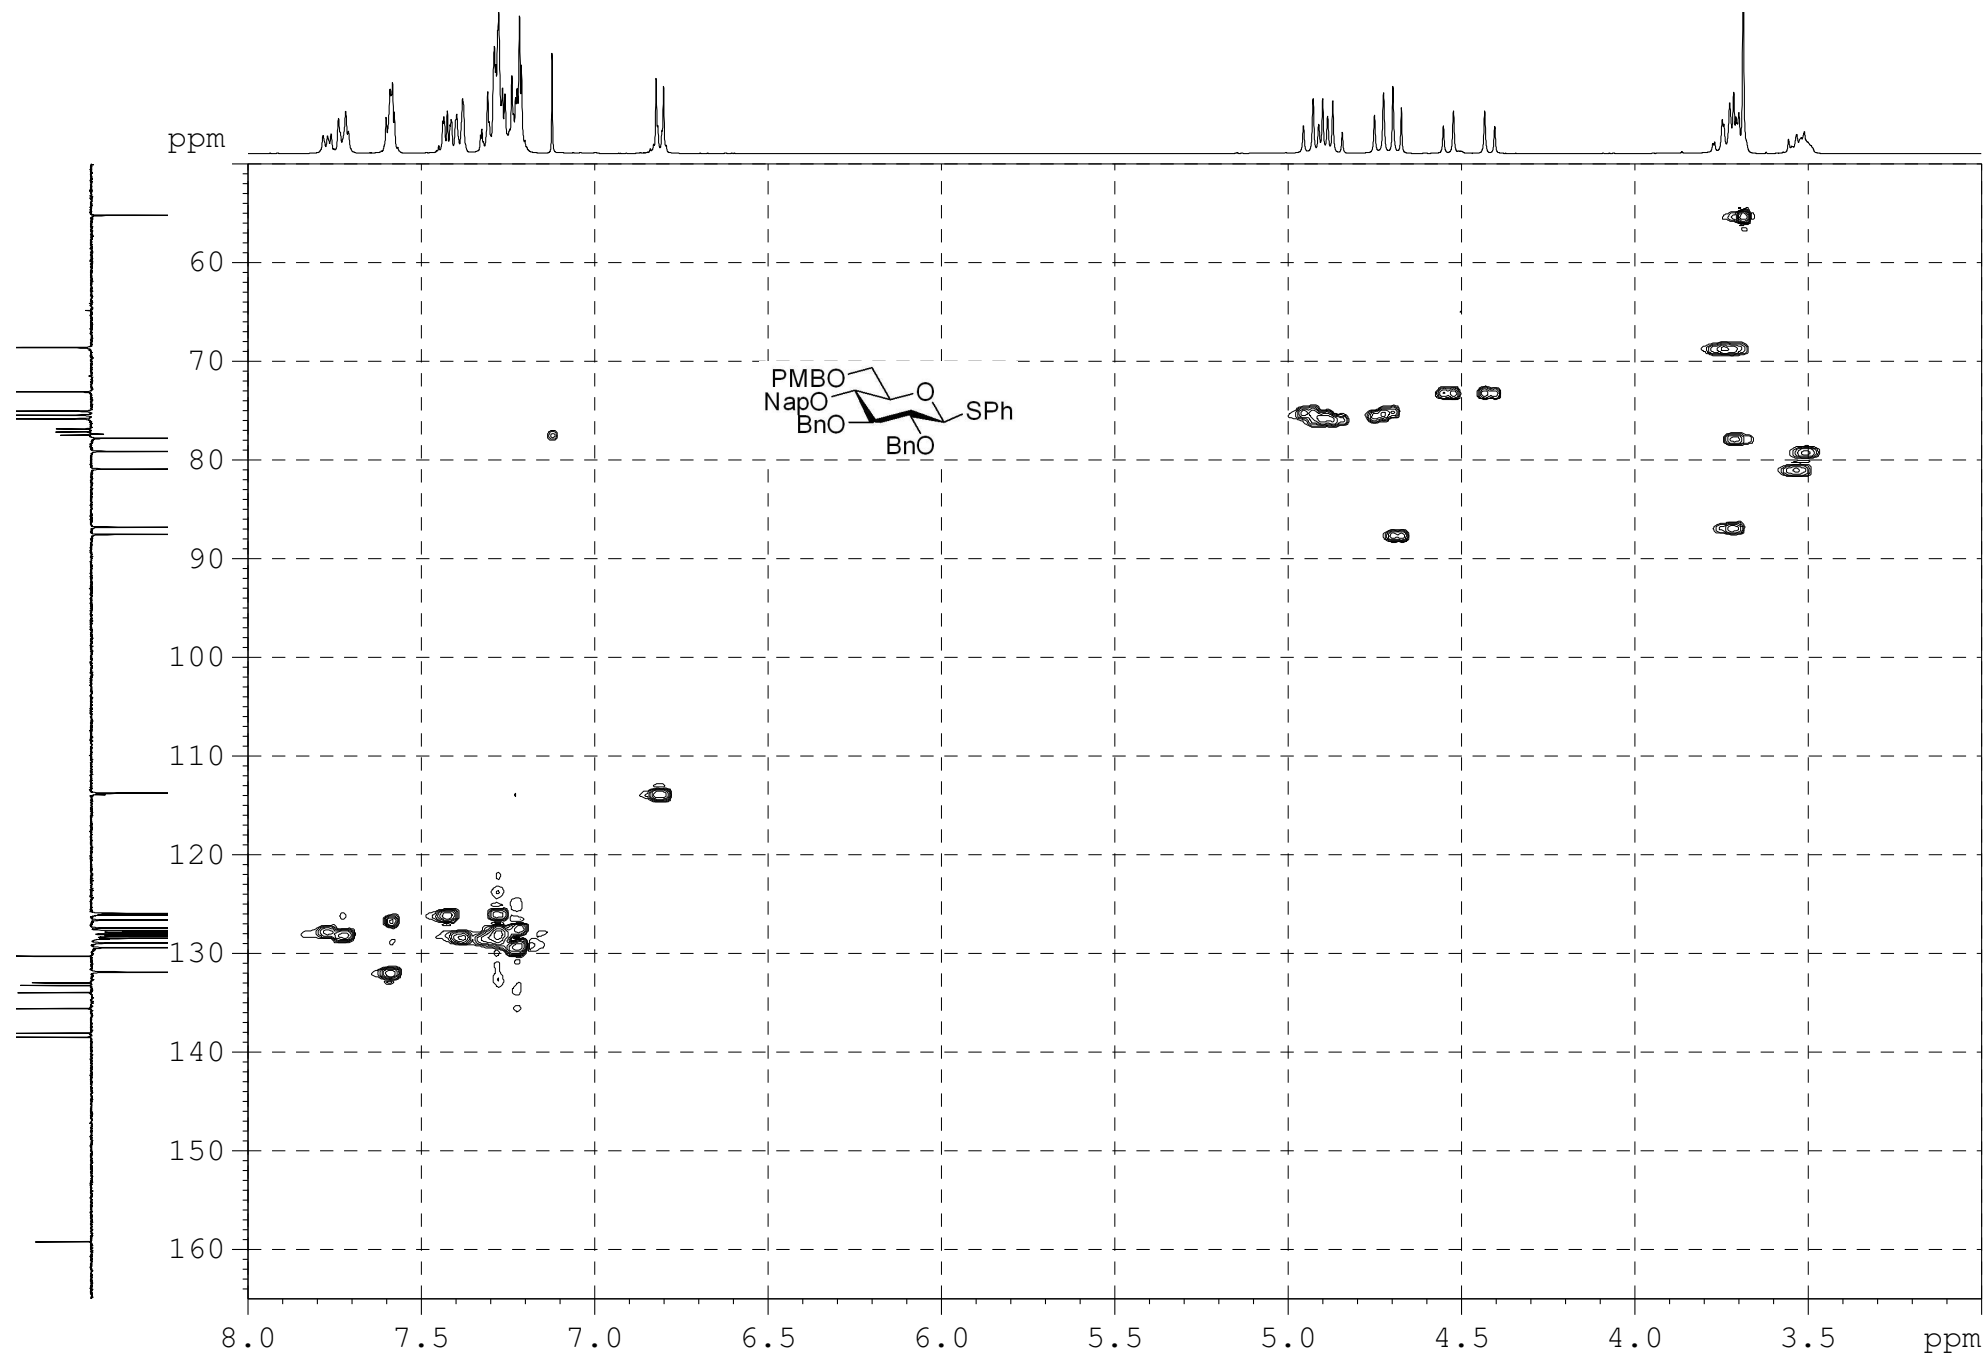

$^1\text{H-NMR}$ ,  $^{13}\text{C-APT}$ ,  $^1\text{H-}^1\text{H COSY}$ , HSQC, HMBC of **5b**

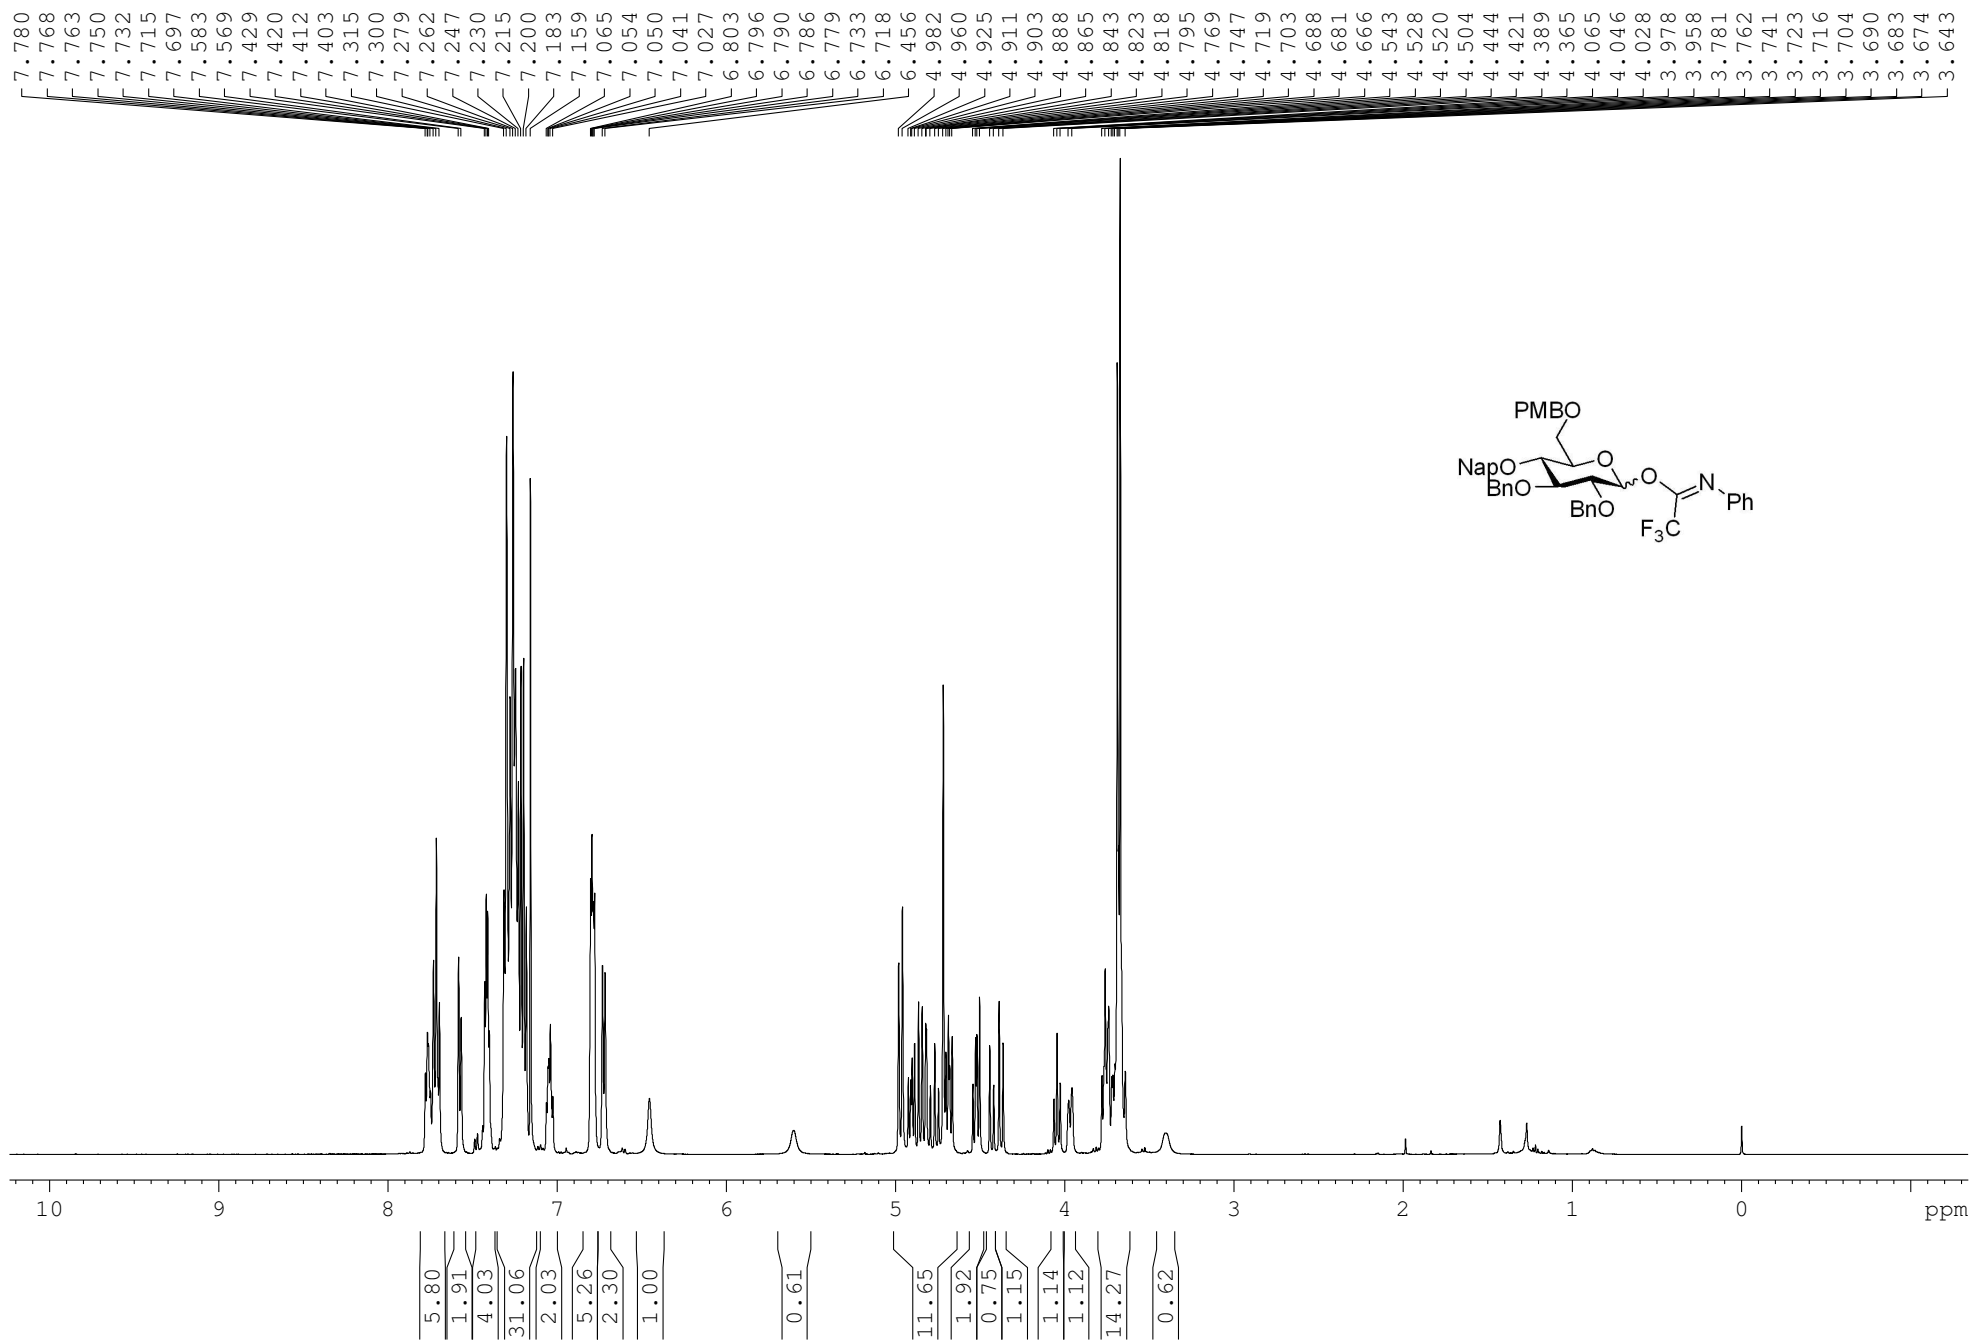

143.95  
143.75  
143.44  
138.97  
138.74  
138.15  
138.13  
135.95  
135.86  
133.58  
133.55  
133.28  
133.27  
130.41  
130.29  
129.62  
129.56  
129.46  
128.81  
128.59  
128.55  
128.48  
128.46  
128.19  
128.08  
128.07  
127.98  
127.95  
127.80  
127.76  
127.71  
127.67  
126.66  
126.45  
126.16  
126.04  
125.99  
124.44  
124.30  
120.75  
119.68  
119.60  
117.64  
115.36  
114.10  
114.08  
97.65  
93.97  
84.78  
81.78  
81.26  
79.71  
77.62  
77.41  
77.34  
77.16  
76.91  
76.06  
75.79  
75.61  
75.30  
75.07  
75.05  
73.54  
73.52  
73.33  
73.27  
68.25  
68.22  
55.31

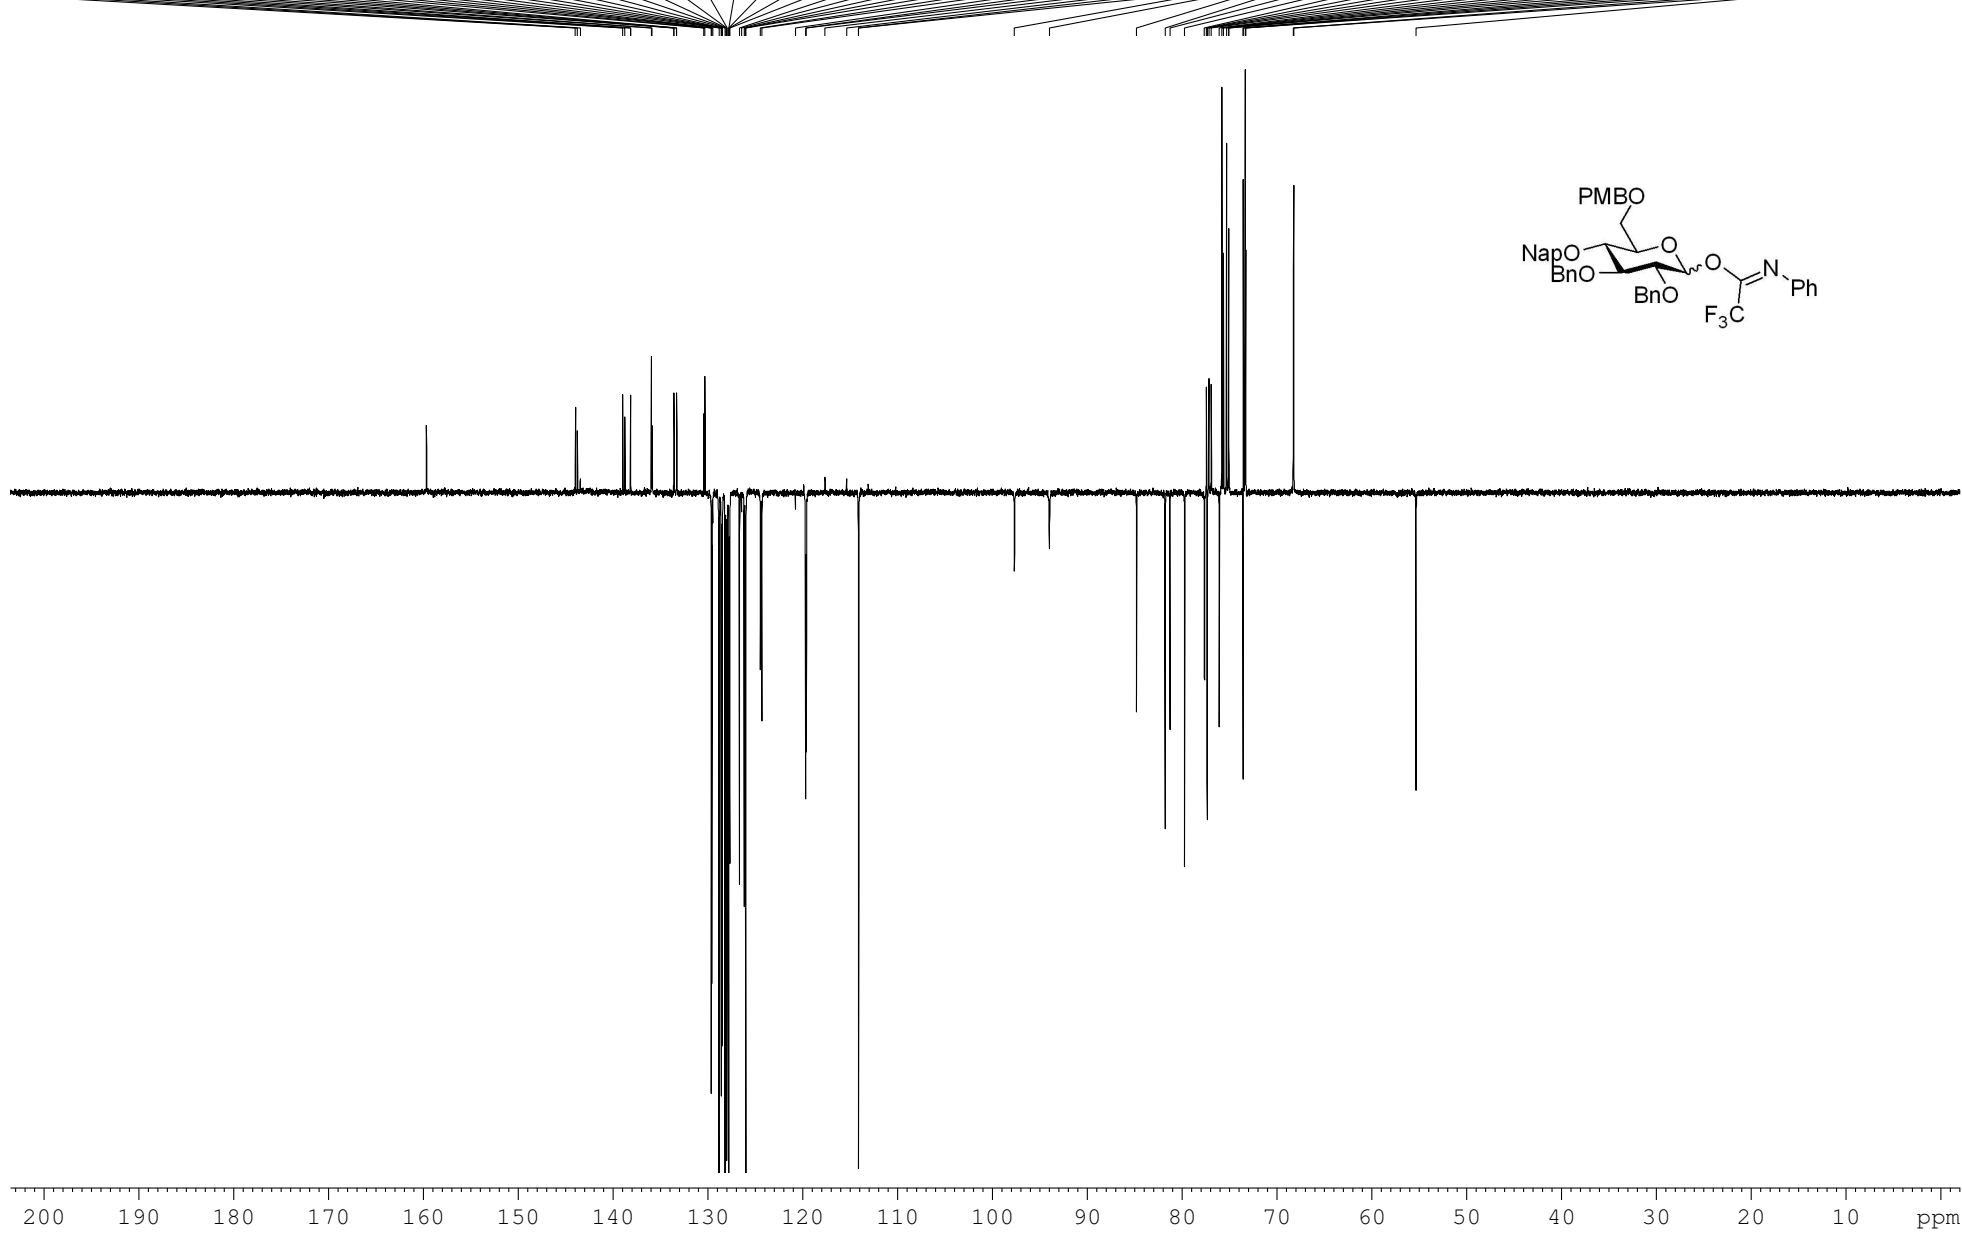

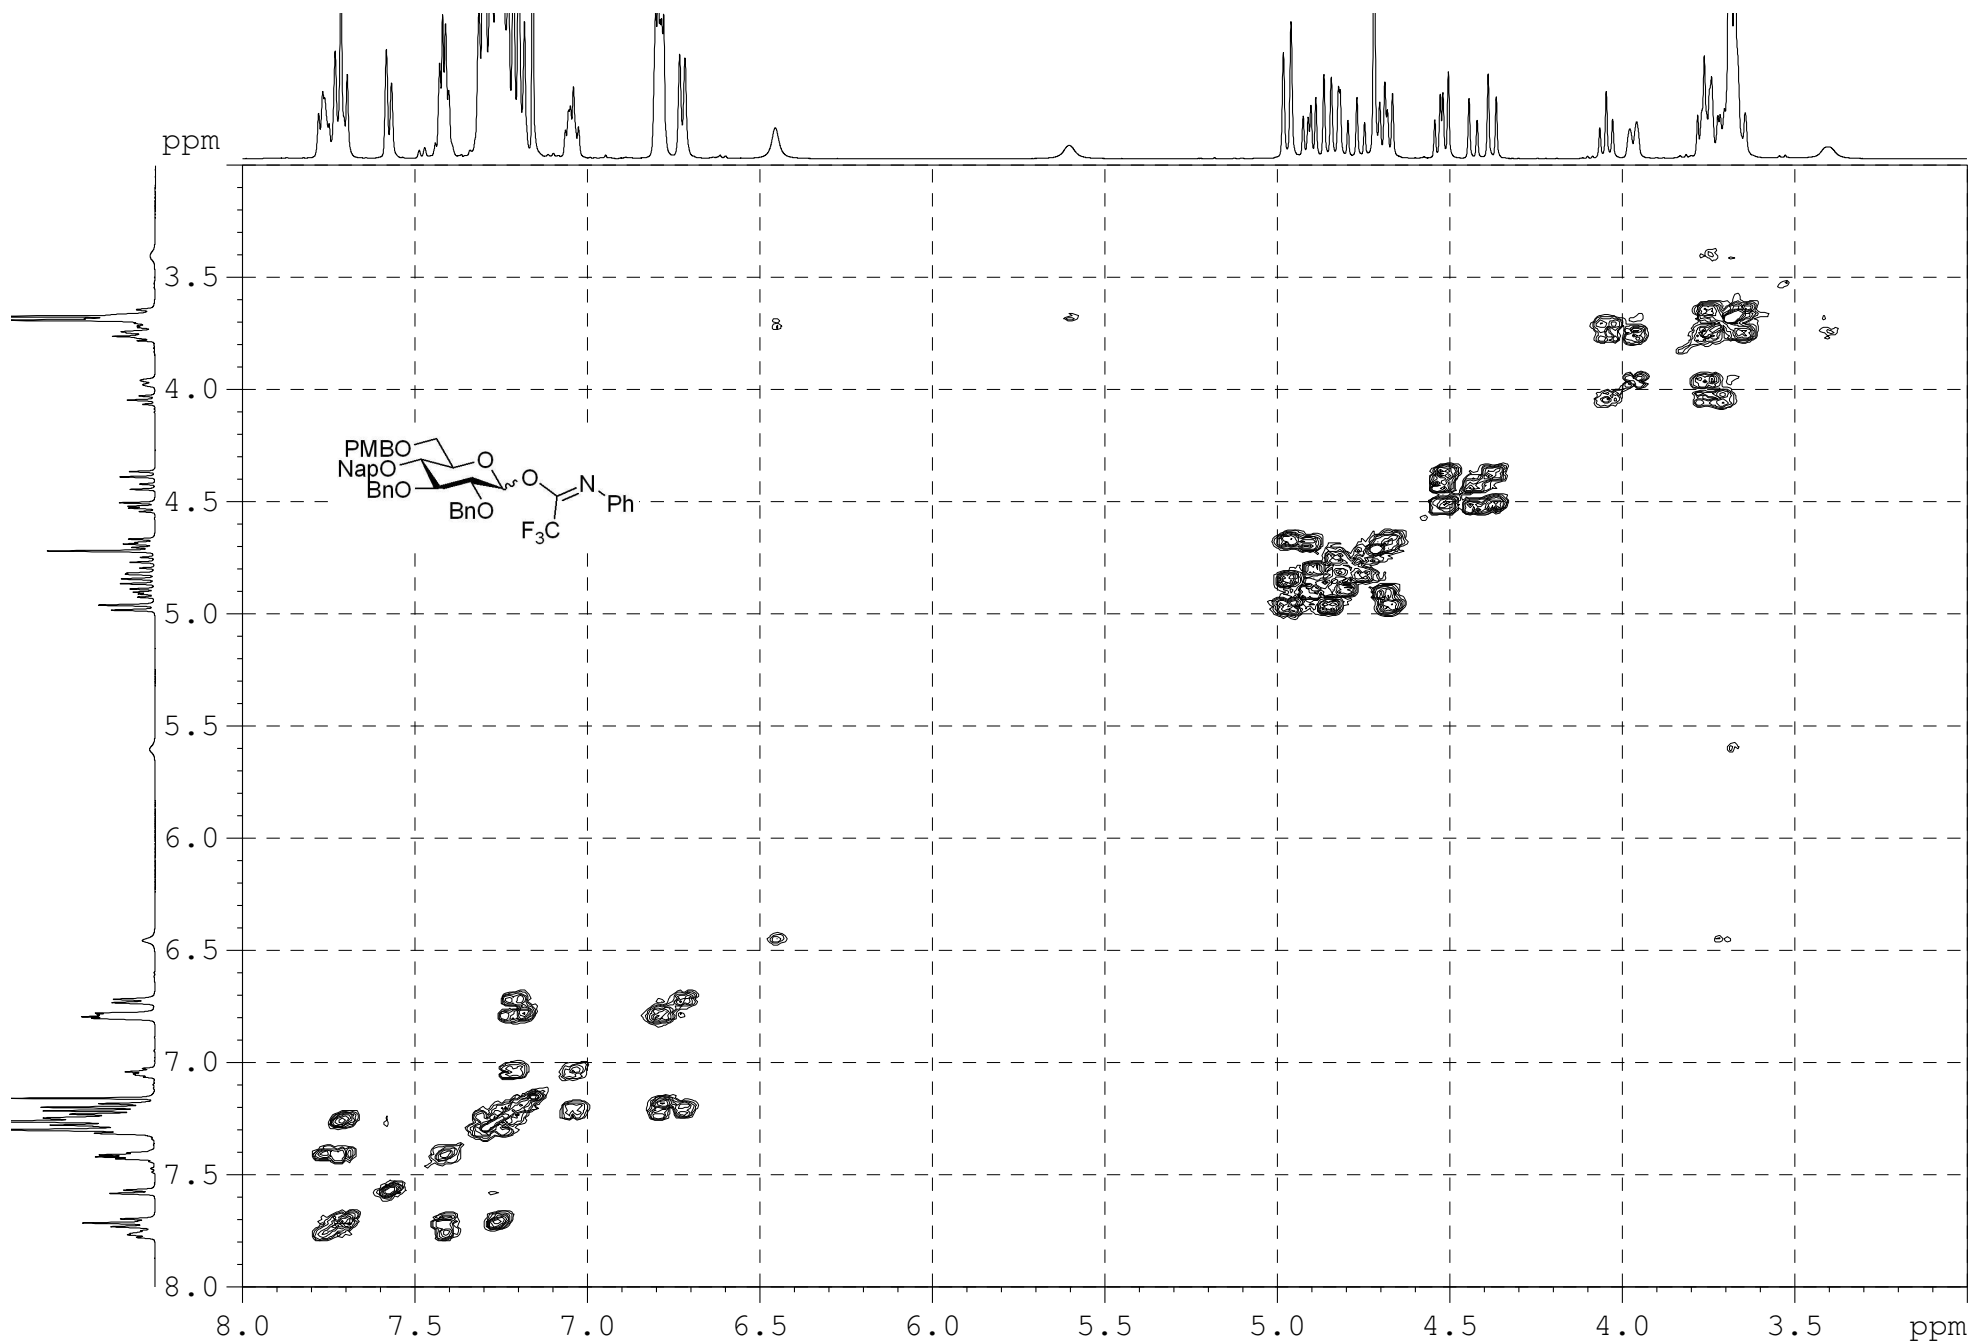

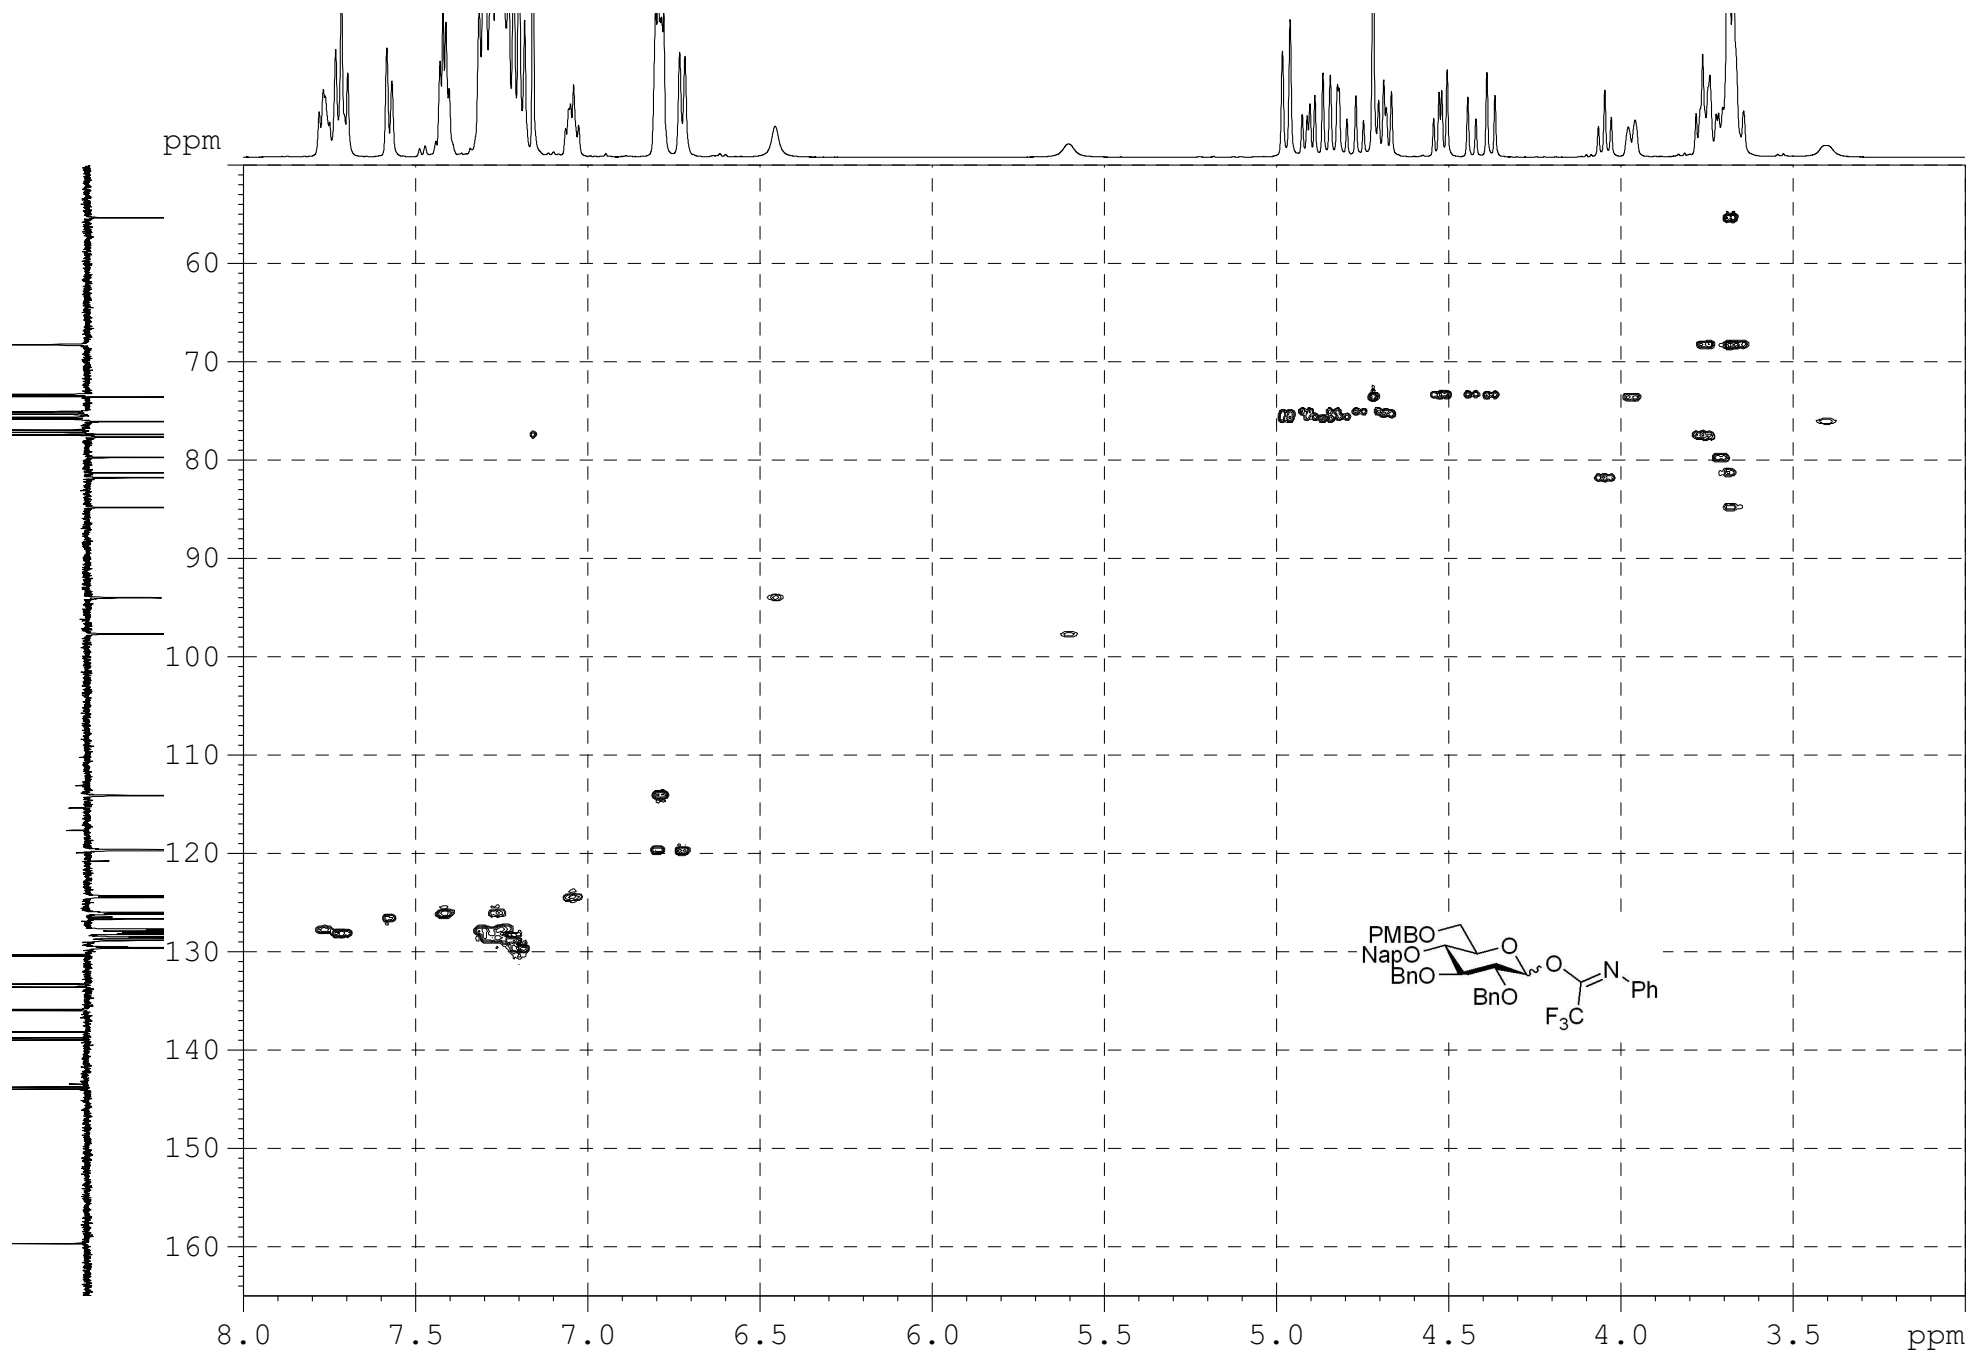

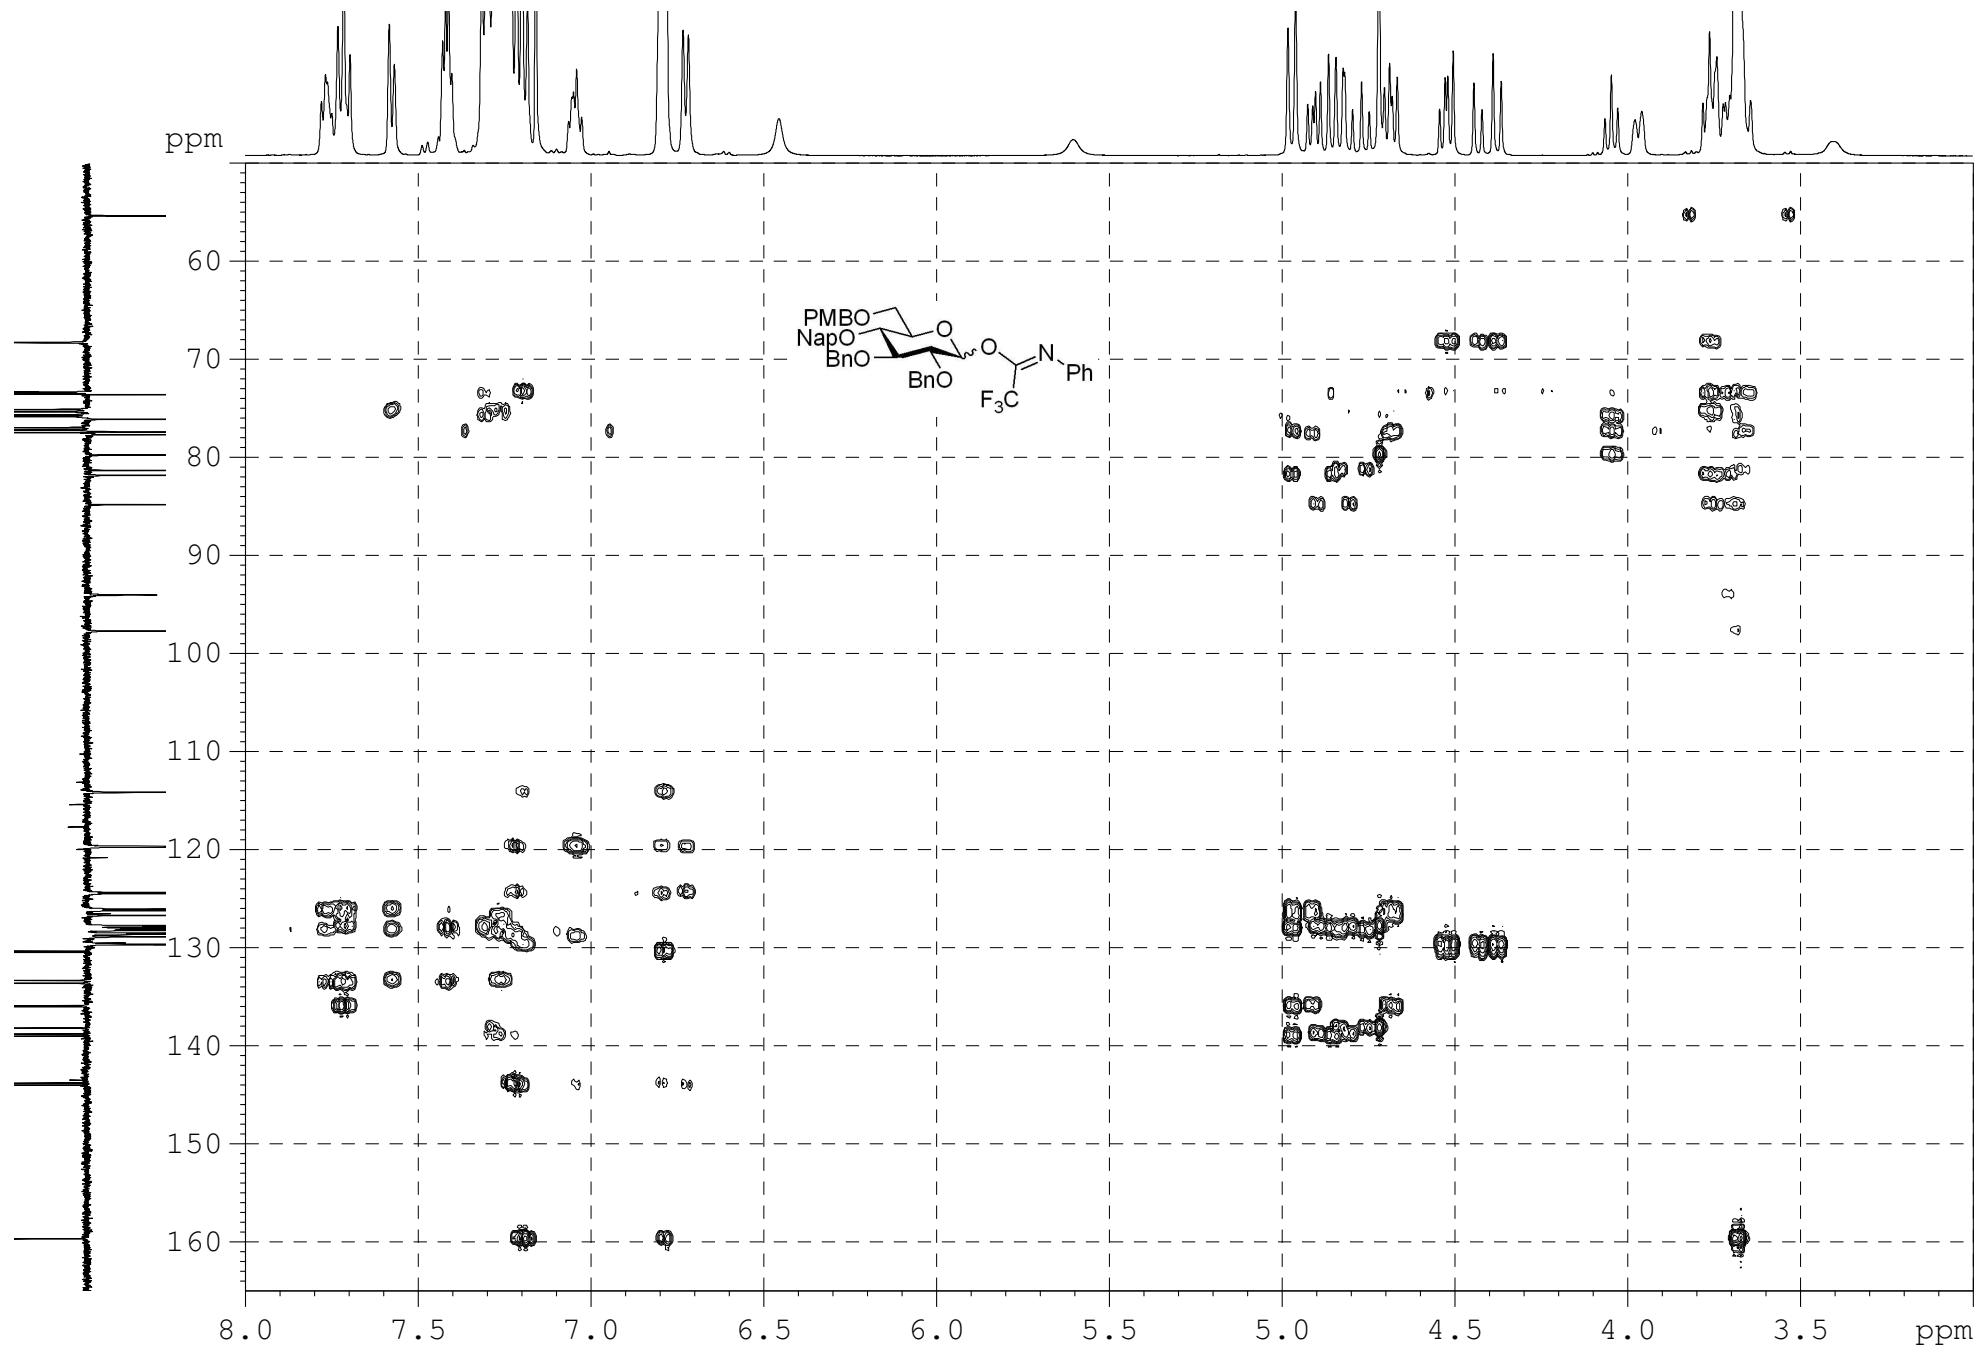

<sup>1</sup>H-NMR of 9

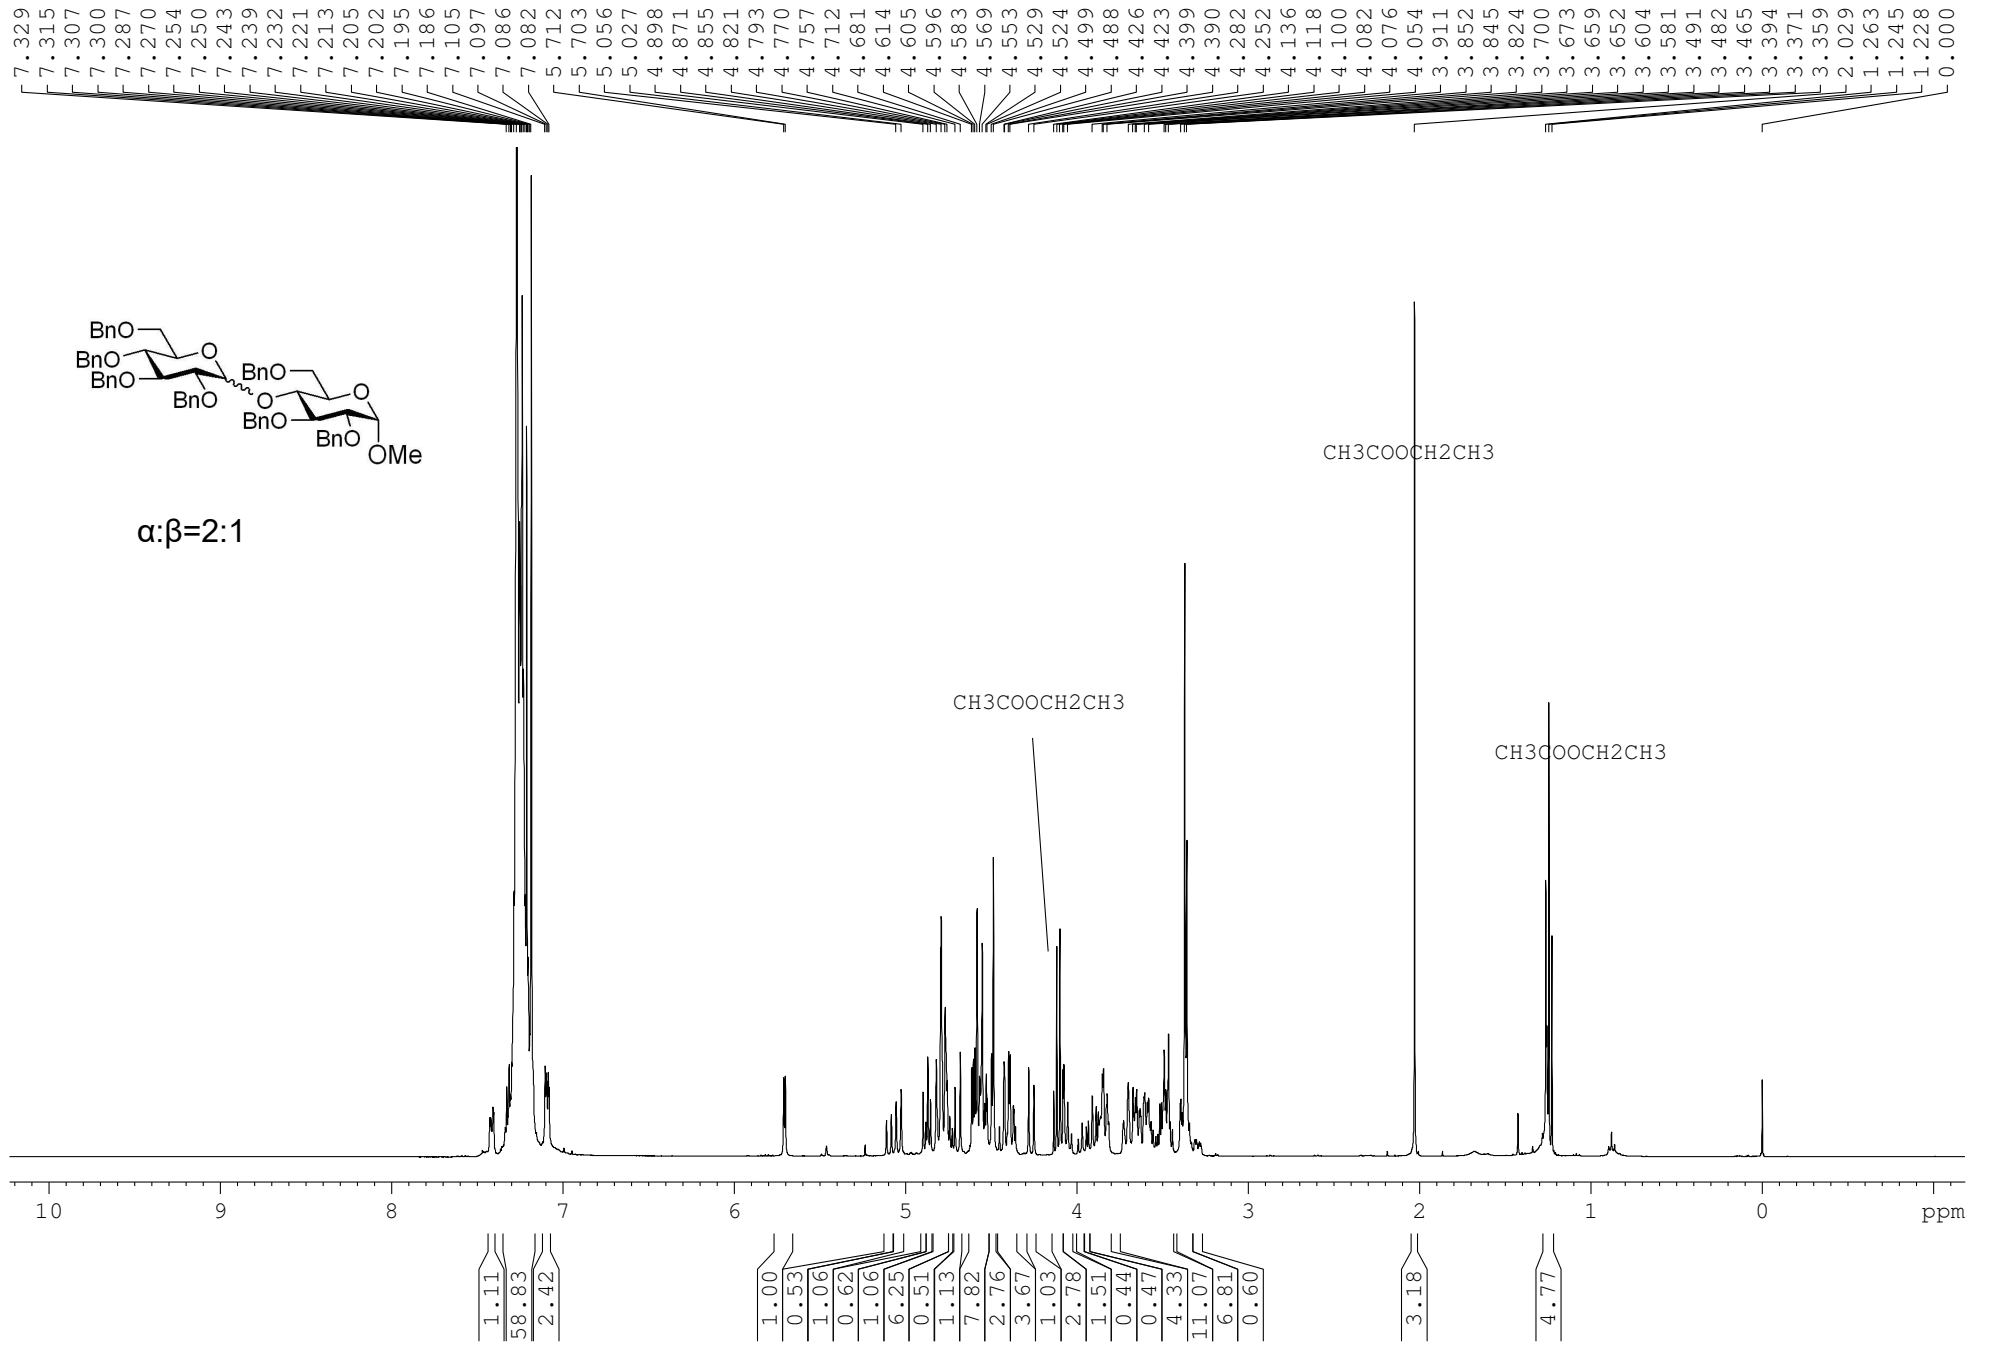

ANALYSIS PARAMETER FILE 0

|         |      |          |       |
|---------|------|----------|-------|
| WIDTH   | 5    | SLOPE    | 7500  |
| DRIFT   | 0    | MIN.AREA | 20000 |
| T.DBL   | 0    | STOP.TM  | 45    |
| ATTEN   | 8    | SPEED    | 2.5   |
| METHOD# | 2241 | FORMAT#  | 0     |
| SPL.WT  | 100  | IS.WT    | 1     |

*Chiral pack AD*  
*Eluent HEX/IPA*  
*UV 254 nm*  
*95/5*  
*1 ml/min*

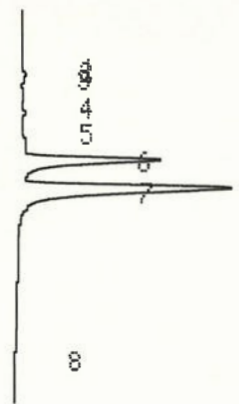

CHROMATOGRAM 1 MEMORIZED

C-R5A CHROMATOPAC  
 CHANNEL NO 1  
 SAMPLE NO 0  
 REPORT NO 28

FILE 0  
 METHOD 2241

| PKNO  | TIME   | AREA    | MK | IDNO | CONC    | NAME |
|-------|--------|---------|----|------|---------|------|
| 1     | 3.285  | 10559   |    |      | 0.3959  |      |
|       |        | 1270hi  |    |      |         |      |
| 2     | 3.466  | 808     | V  |      | 0.0303  |      |
|       |        | 343hi   |    |      |         |      |
| 3     | 3.688  | 5029    |    |      | 0.1885  |      |
|       |        | 423hi   |    |      |         |      |
| 4     | 5.367  | 20494   |    |      | 0.7683  |      |
|       |        | 1660hi  |    |      |         |      |
| 5     | 6.748  | 4115    |    |      | 0.1543  |      |
|       |        | 439hi   |    |      |         |      |
| 6     | 7.954  | 895145  |    |      | 33.5582 |      |
|       |        | 34474hi |    |      |         |      |
| 7     | 9.443  | 1719131 |    |      | 64.4486 |      |
|       |        | 52613hi |    |      |         |      |
| 8     | 18.226 | 12164   |    |      | 0.456   |      |
|       |        | 452hi   |    |      |         |      |
| TOTAL |        | 2667444 |    |      | 100     |      |



<sup>1</sup>H-NMR of 9

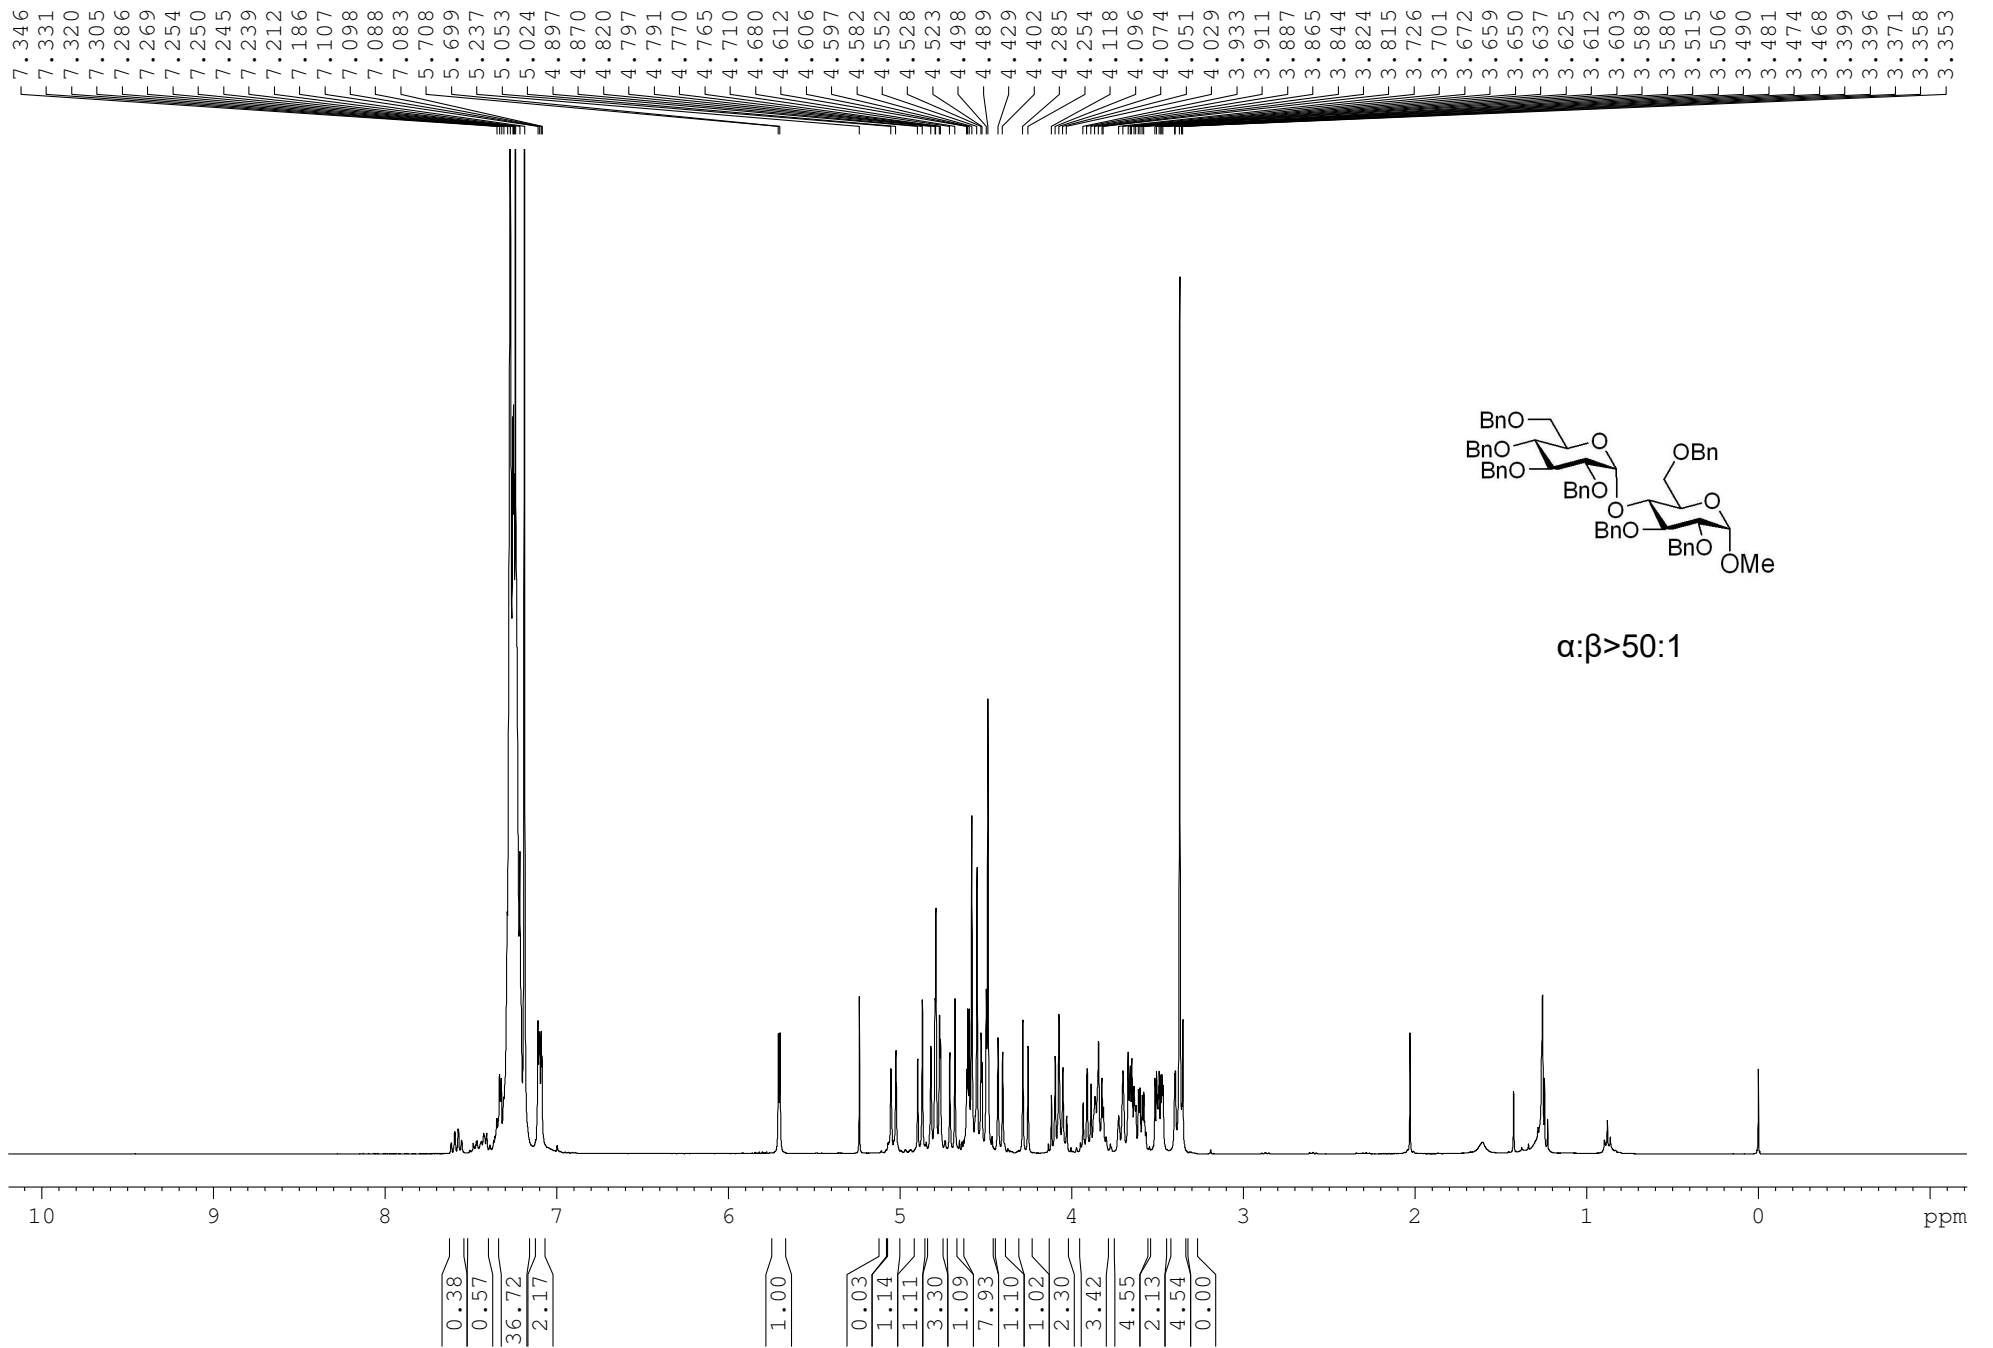

7

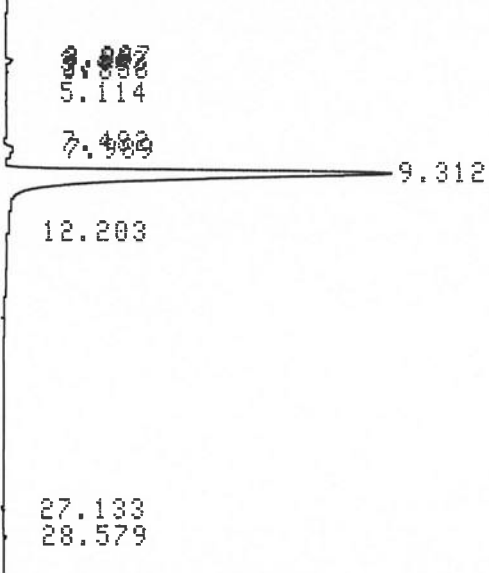

CHROMATOGRAM 1 MEMORIZED

C-R5A CHROMATOPAC  
 CHANNEL NO 1  
 SAMPLE NO 0  
 REPORT NO 38

FILE 0  
 METHOD 2041

| PKNO  | TIME  | AREA               | MK | IDNO | CONC    | NAME |
|-------|-------|--------------------|----|------|---------|------|
| 1     | 3.26  | 22080<br>2212hi    | V  |      | 0.6756  |      |
| 2     | 7.989 | 40699<br>2093hi    |    |      | 1.2453  |      |
| 3     | 9.312 | 3205479<br>96667hi |    |      | 98.0791 |      |
| TOTAL |       | 3268258            |    |      | 100     |      |

<sup>1</sup>H-NMR, <sup>13</sup>C-APT, <sup>1</sup>H-<sup>1</sup>H COSY, HSQC, HMBC, GATED of **10**

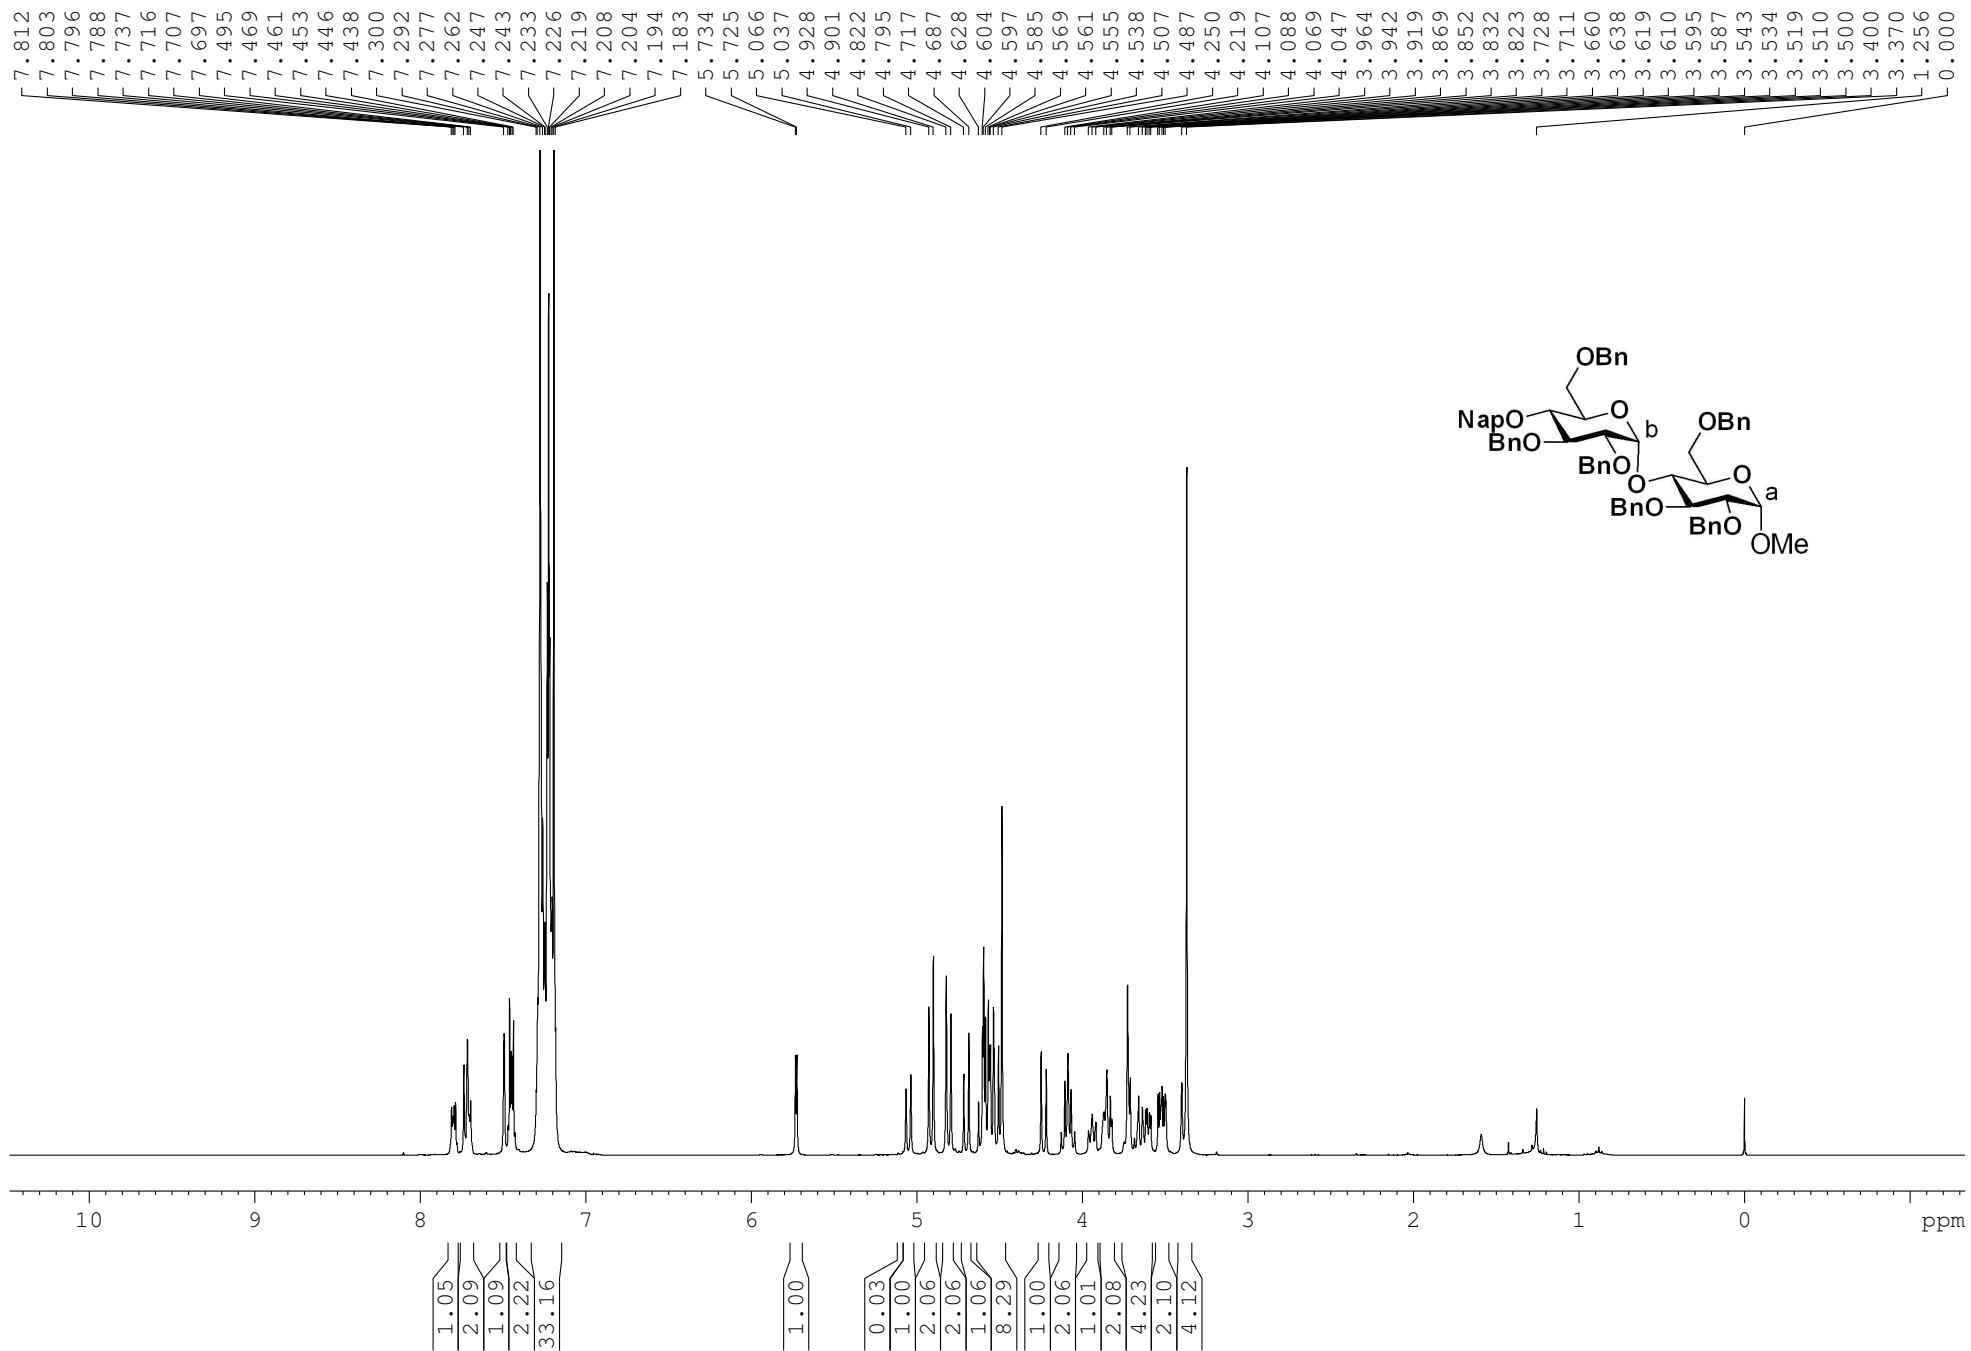

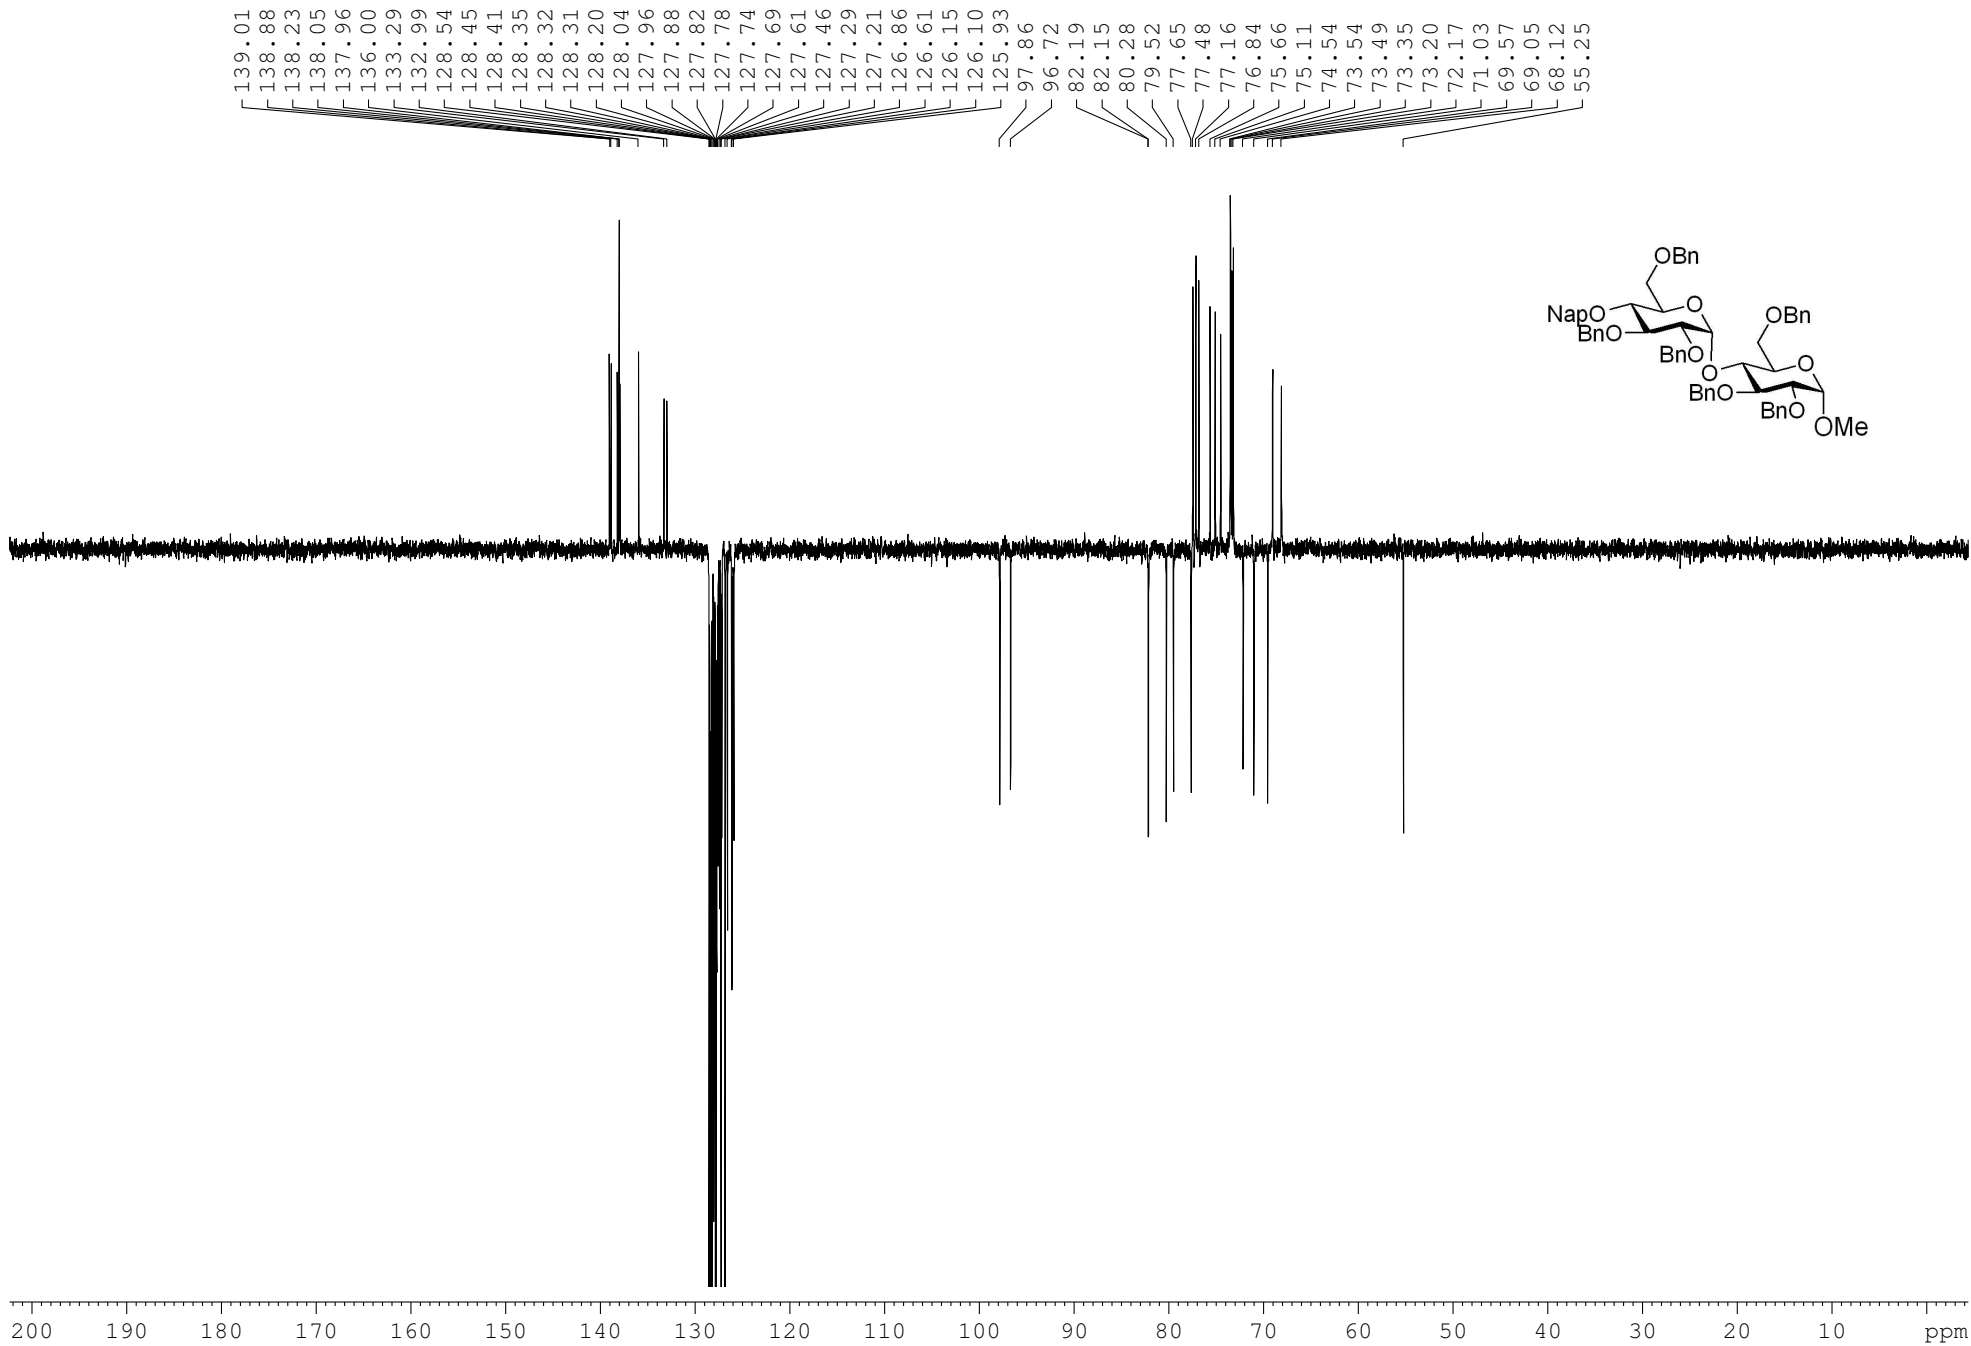

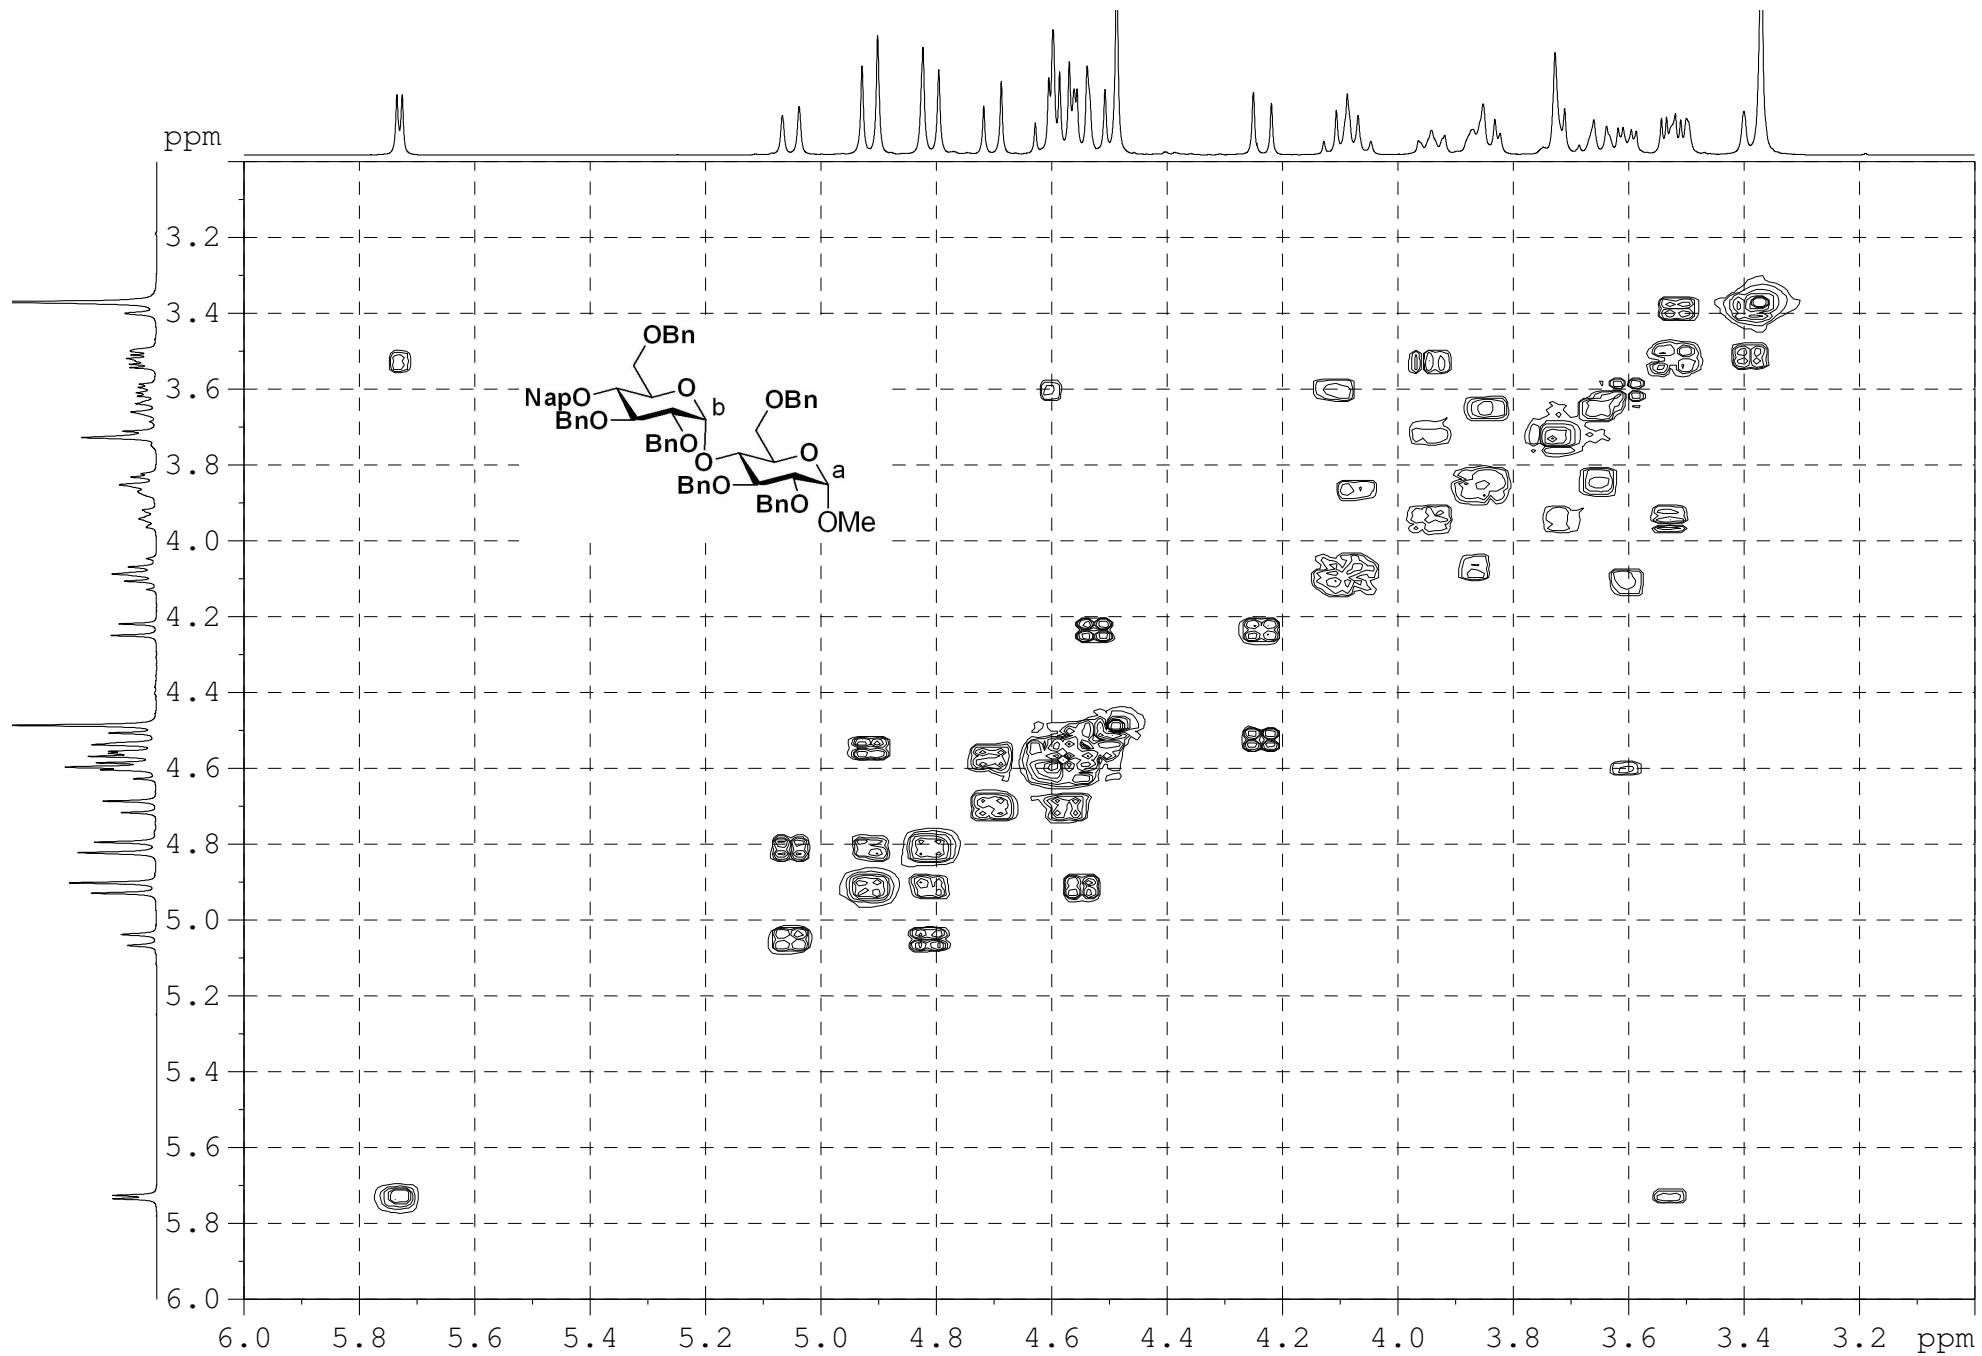

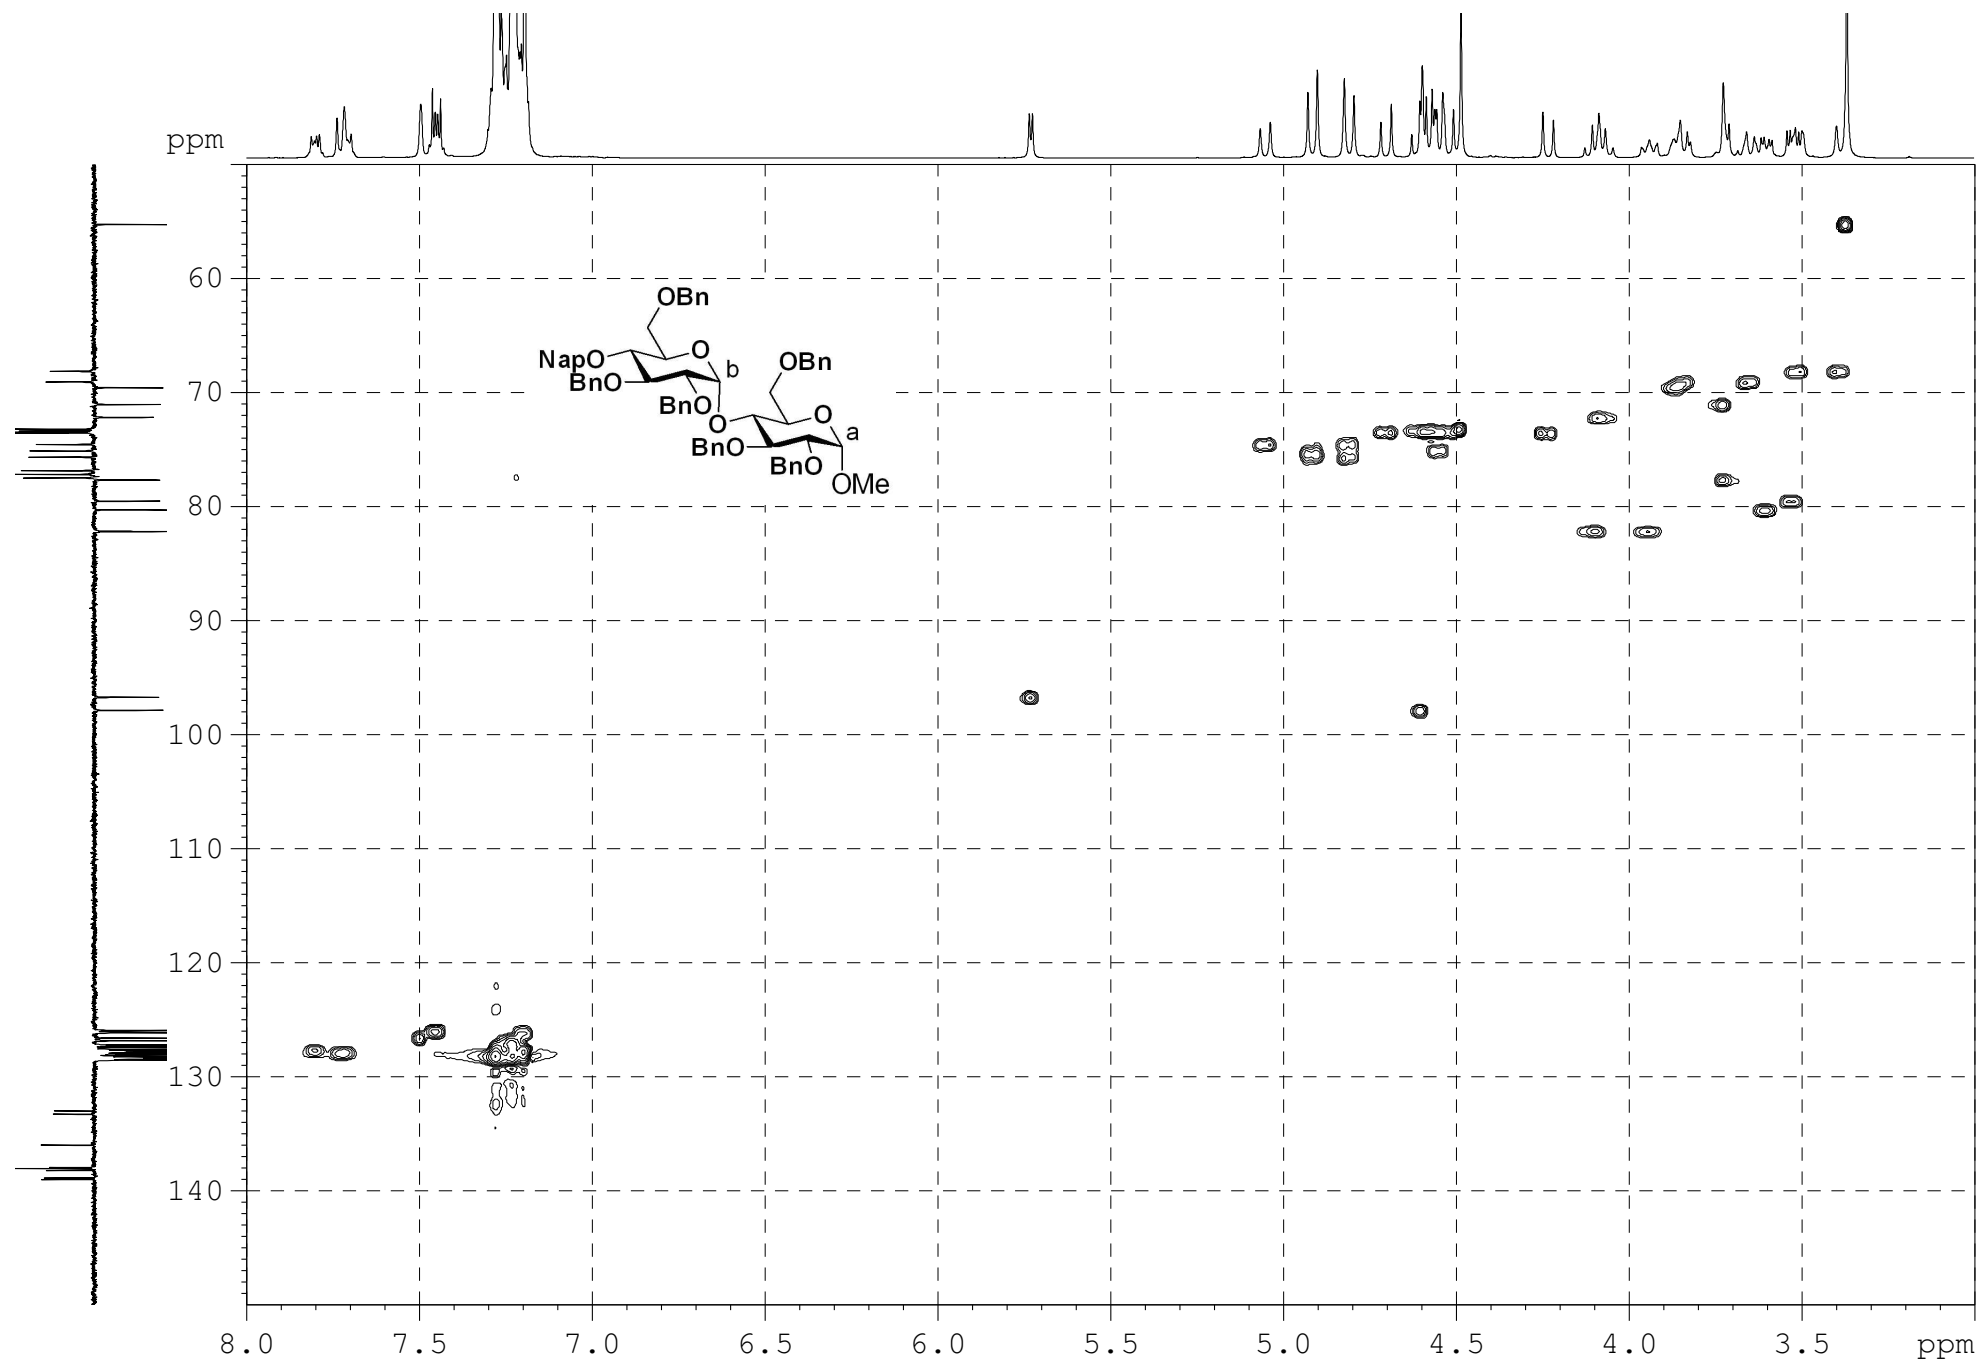

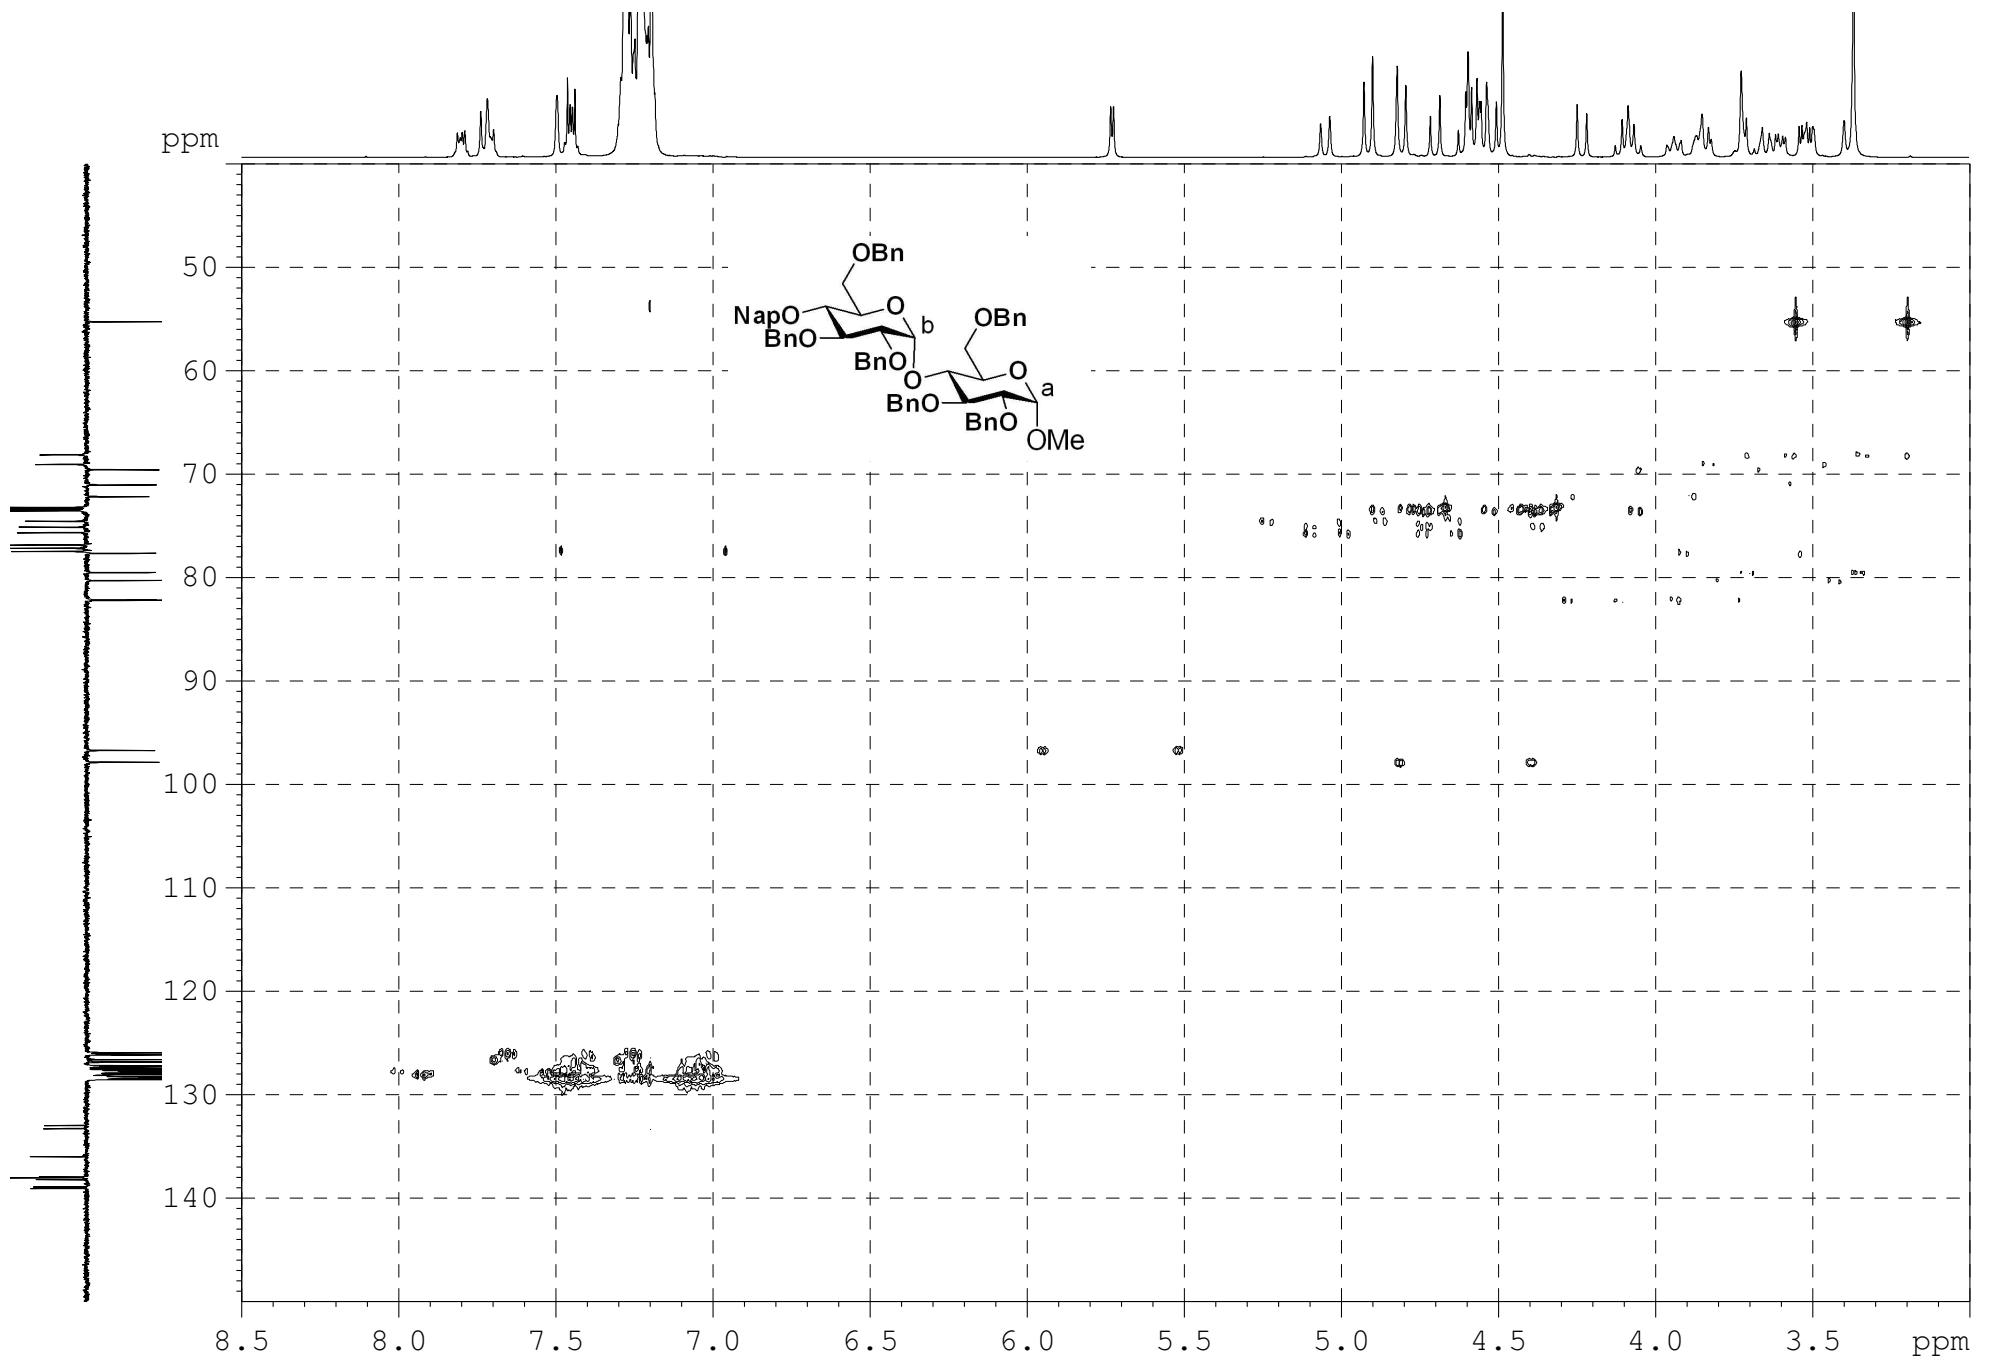

<sup>1</sup>H-NMR of **11**

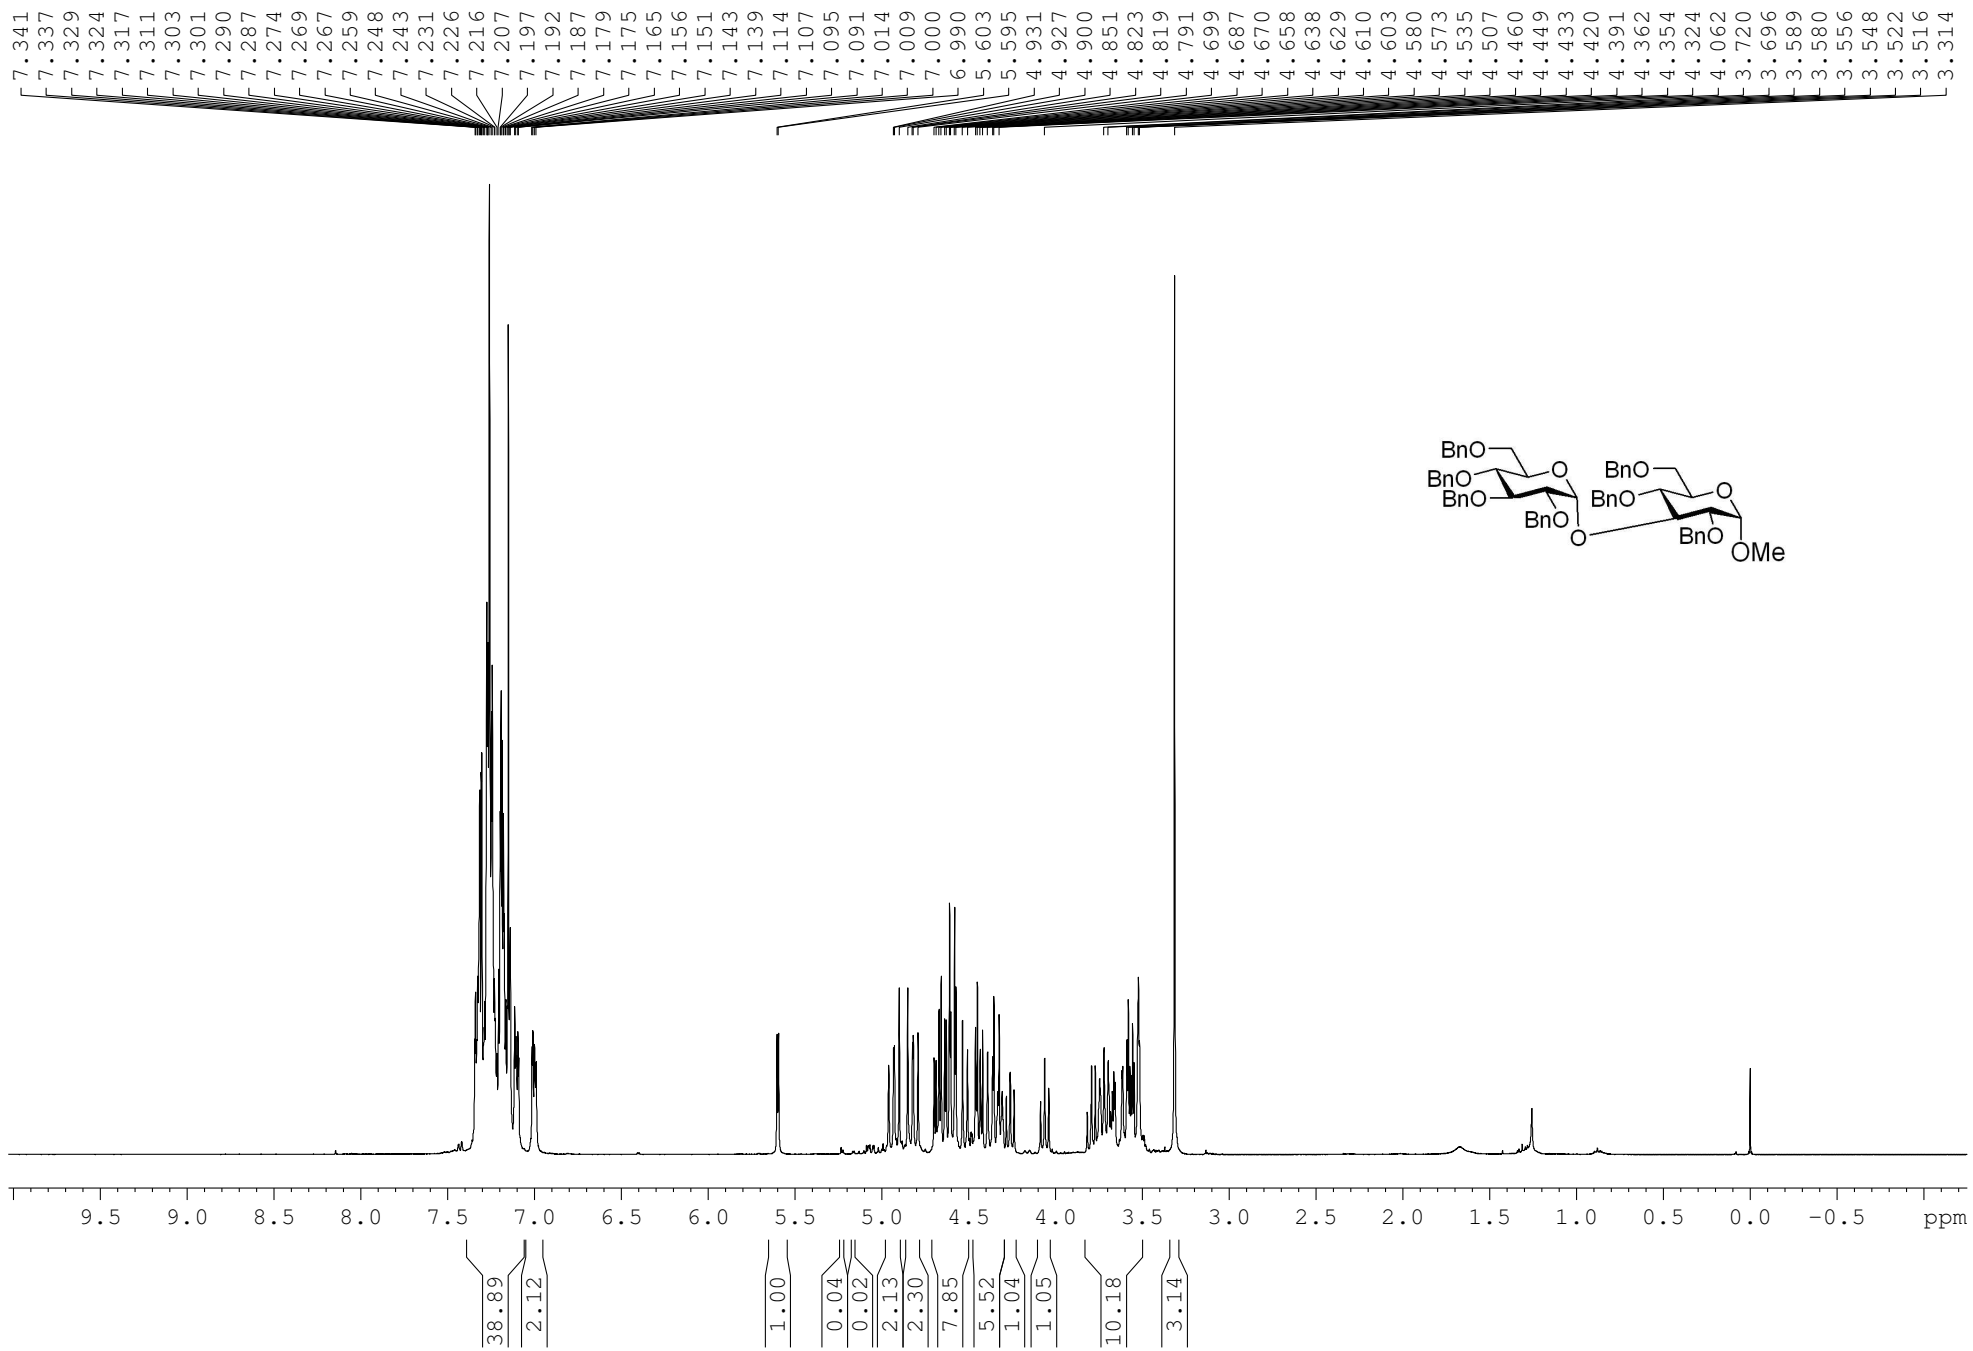



<sup>1</sup>H-NMR of 12

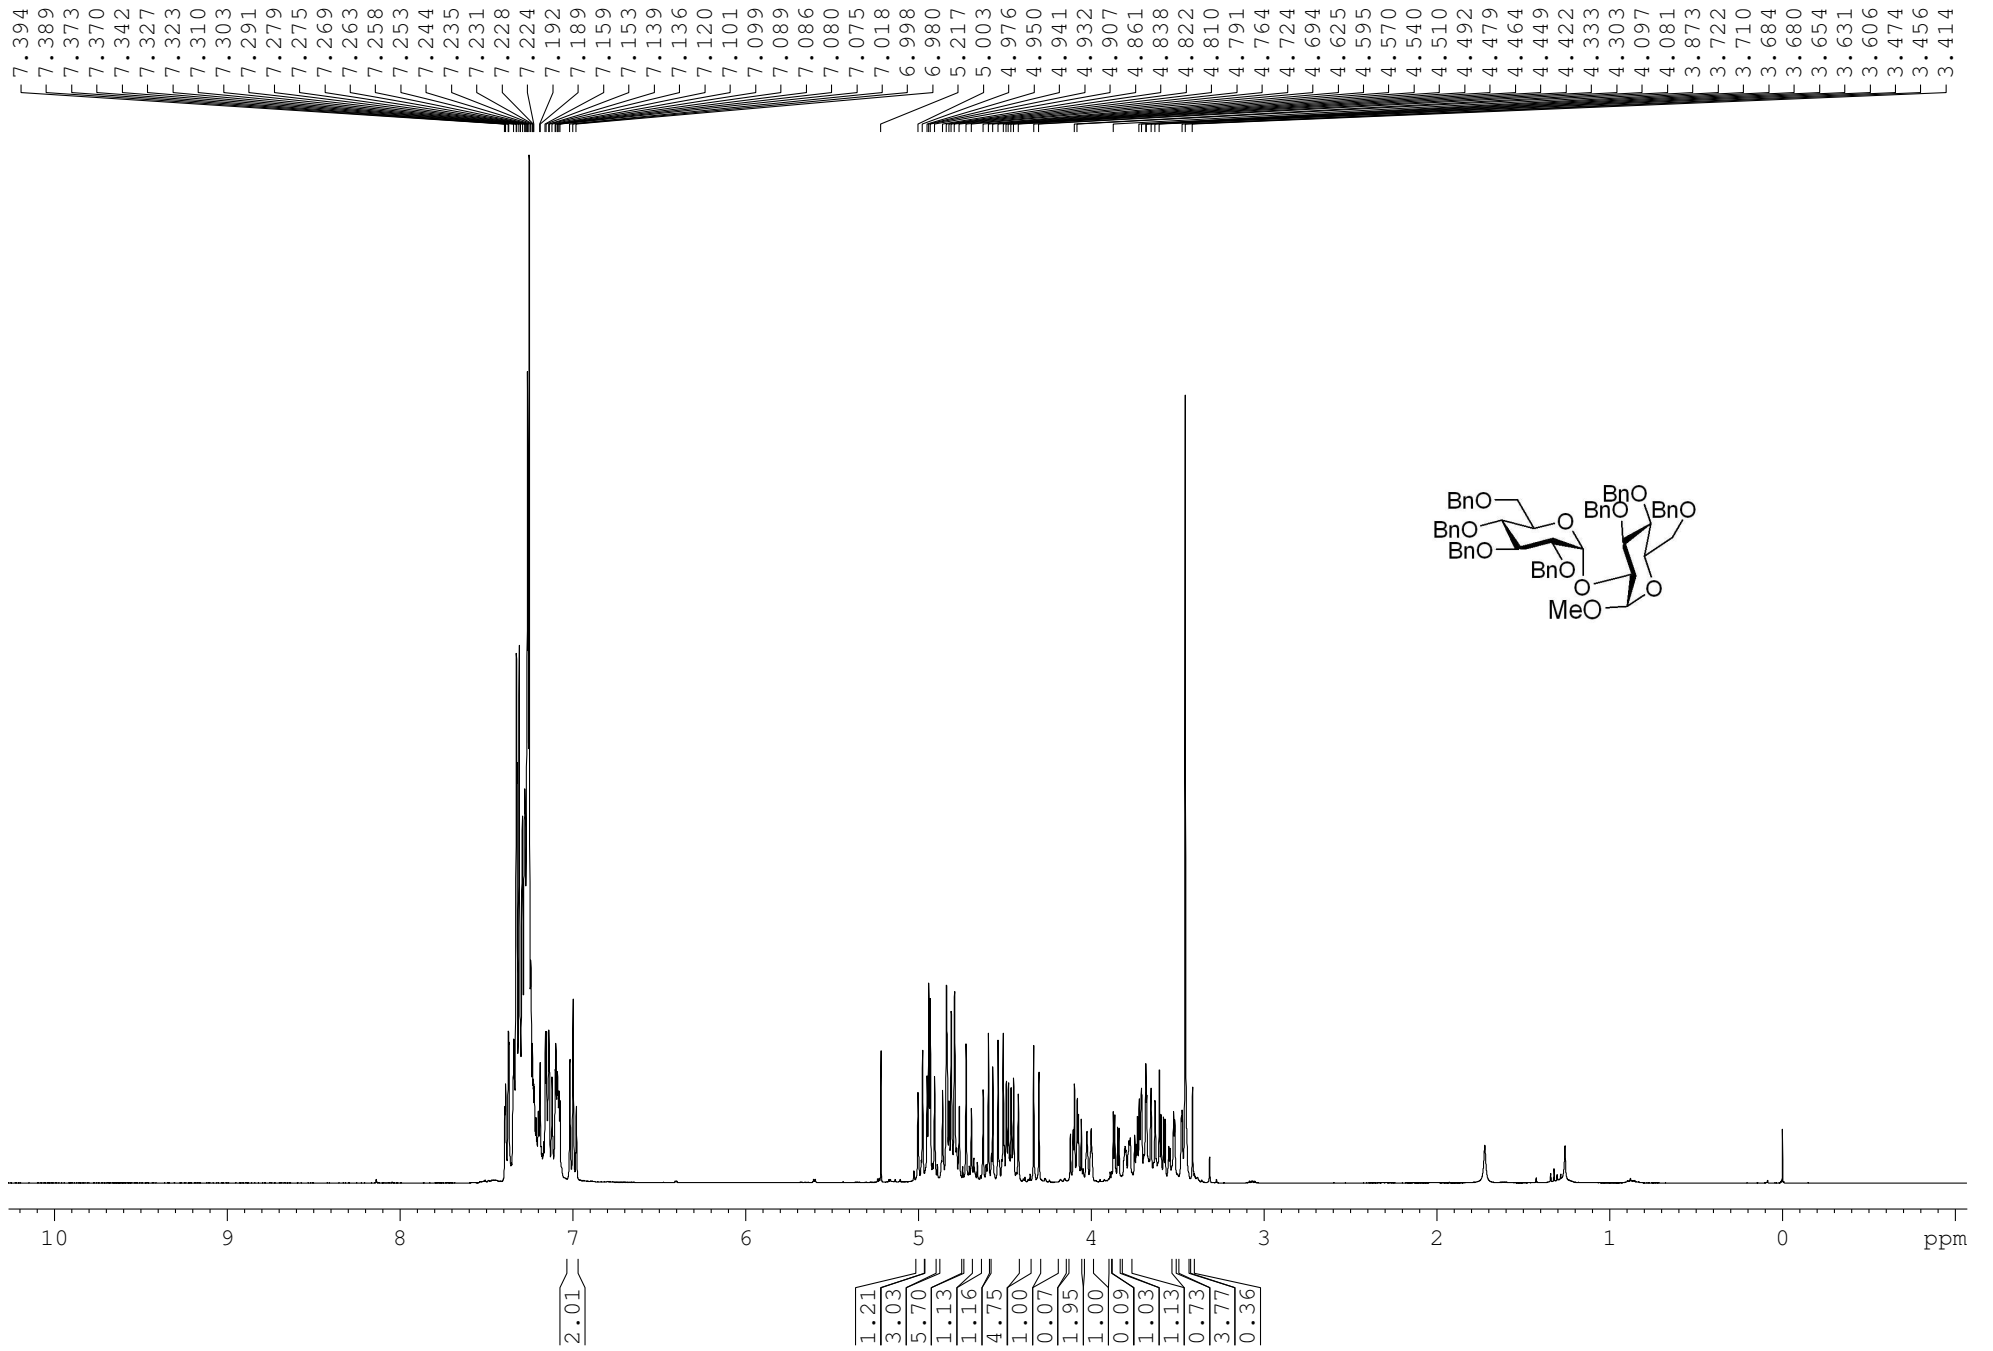

<sup>1</sup>H-NMR, <sup>13</sup>C-APT of **13**

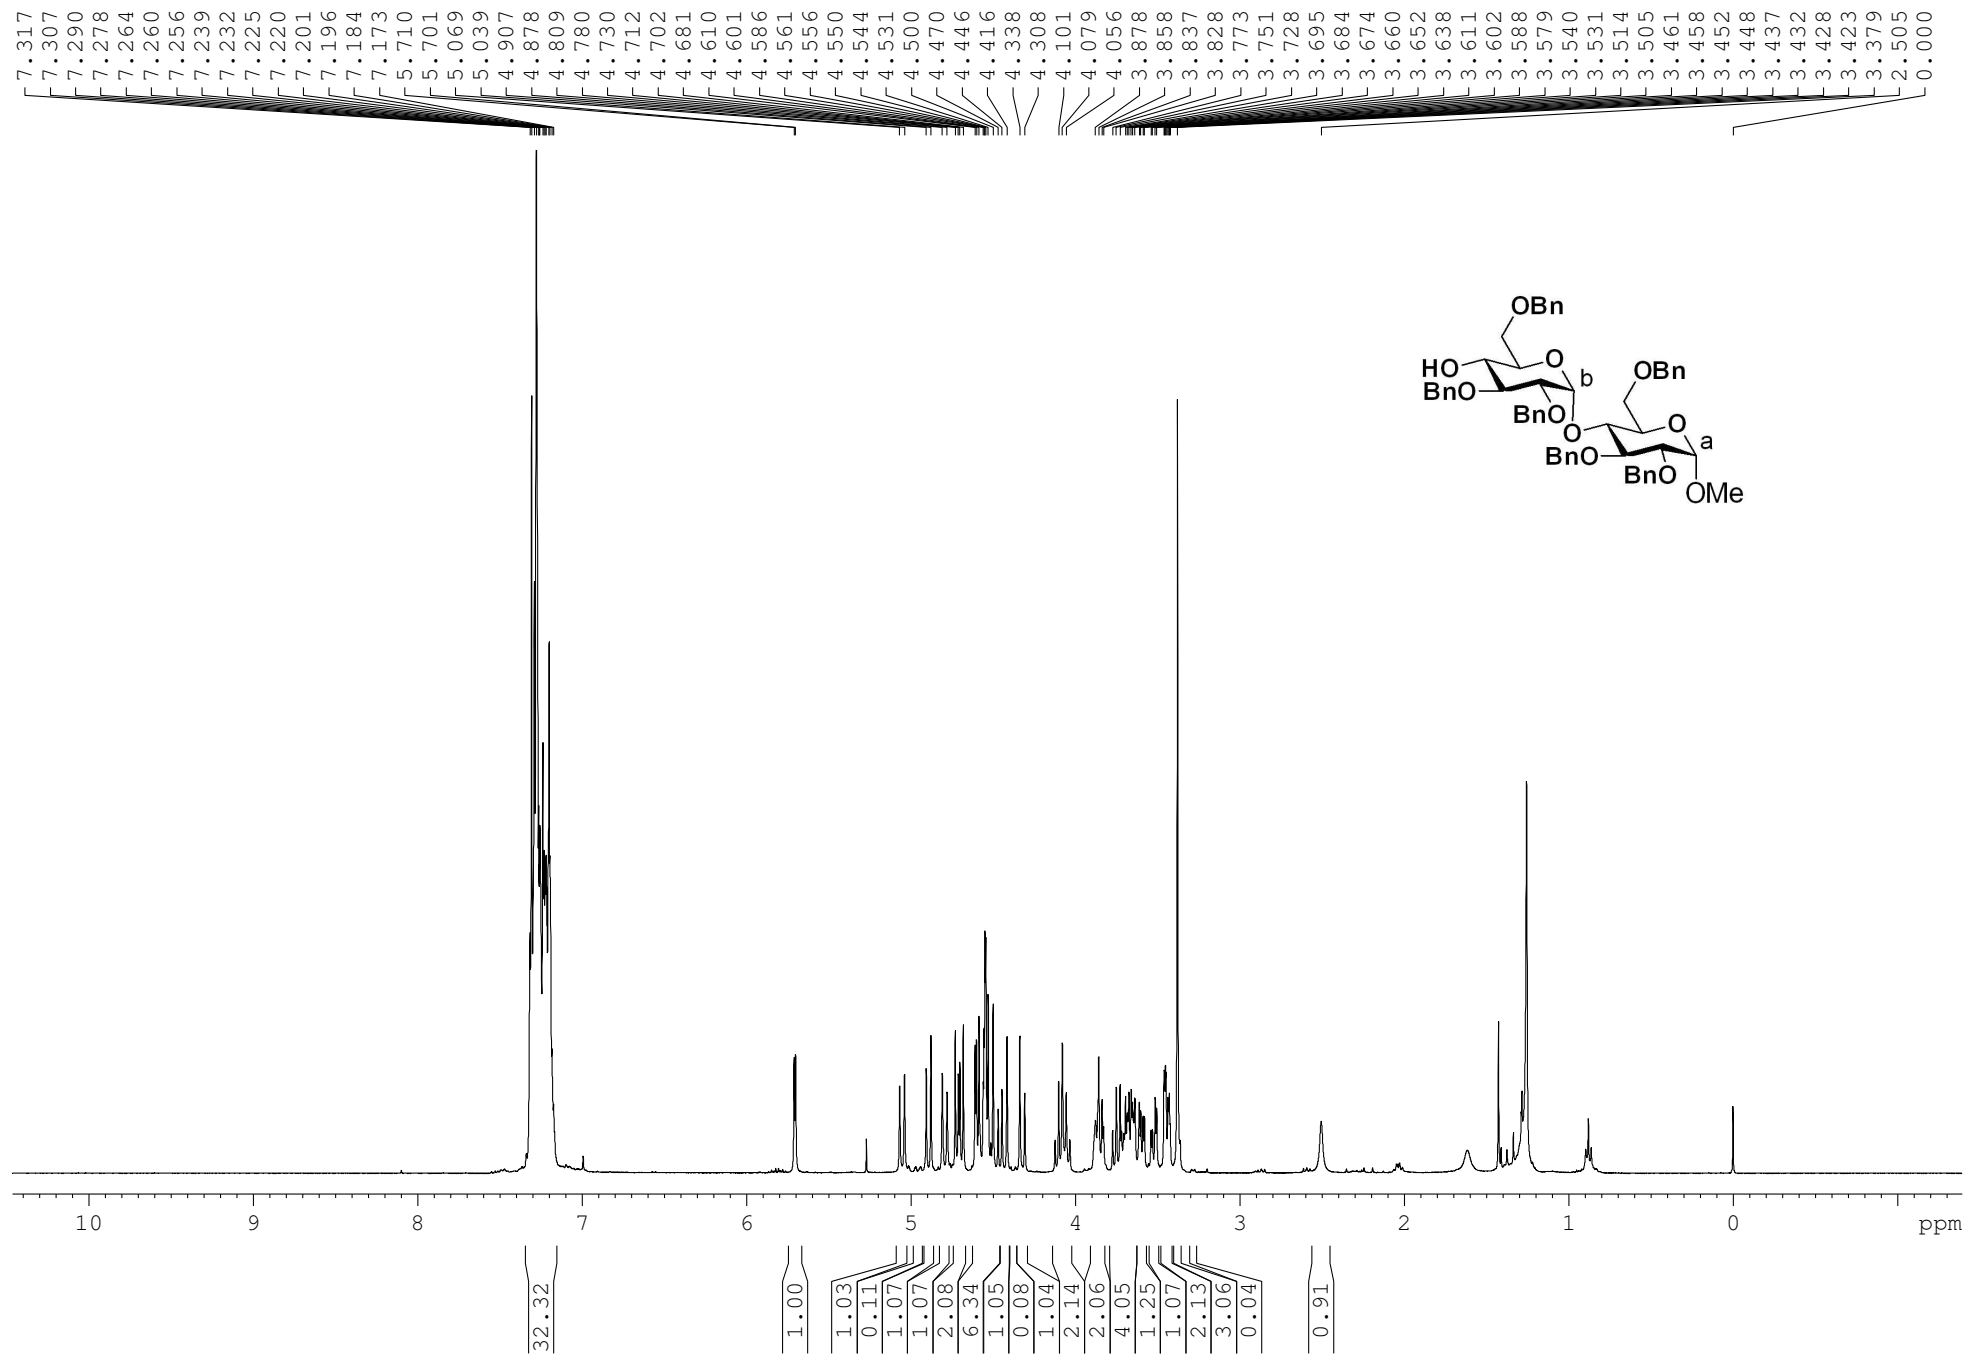

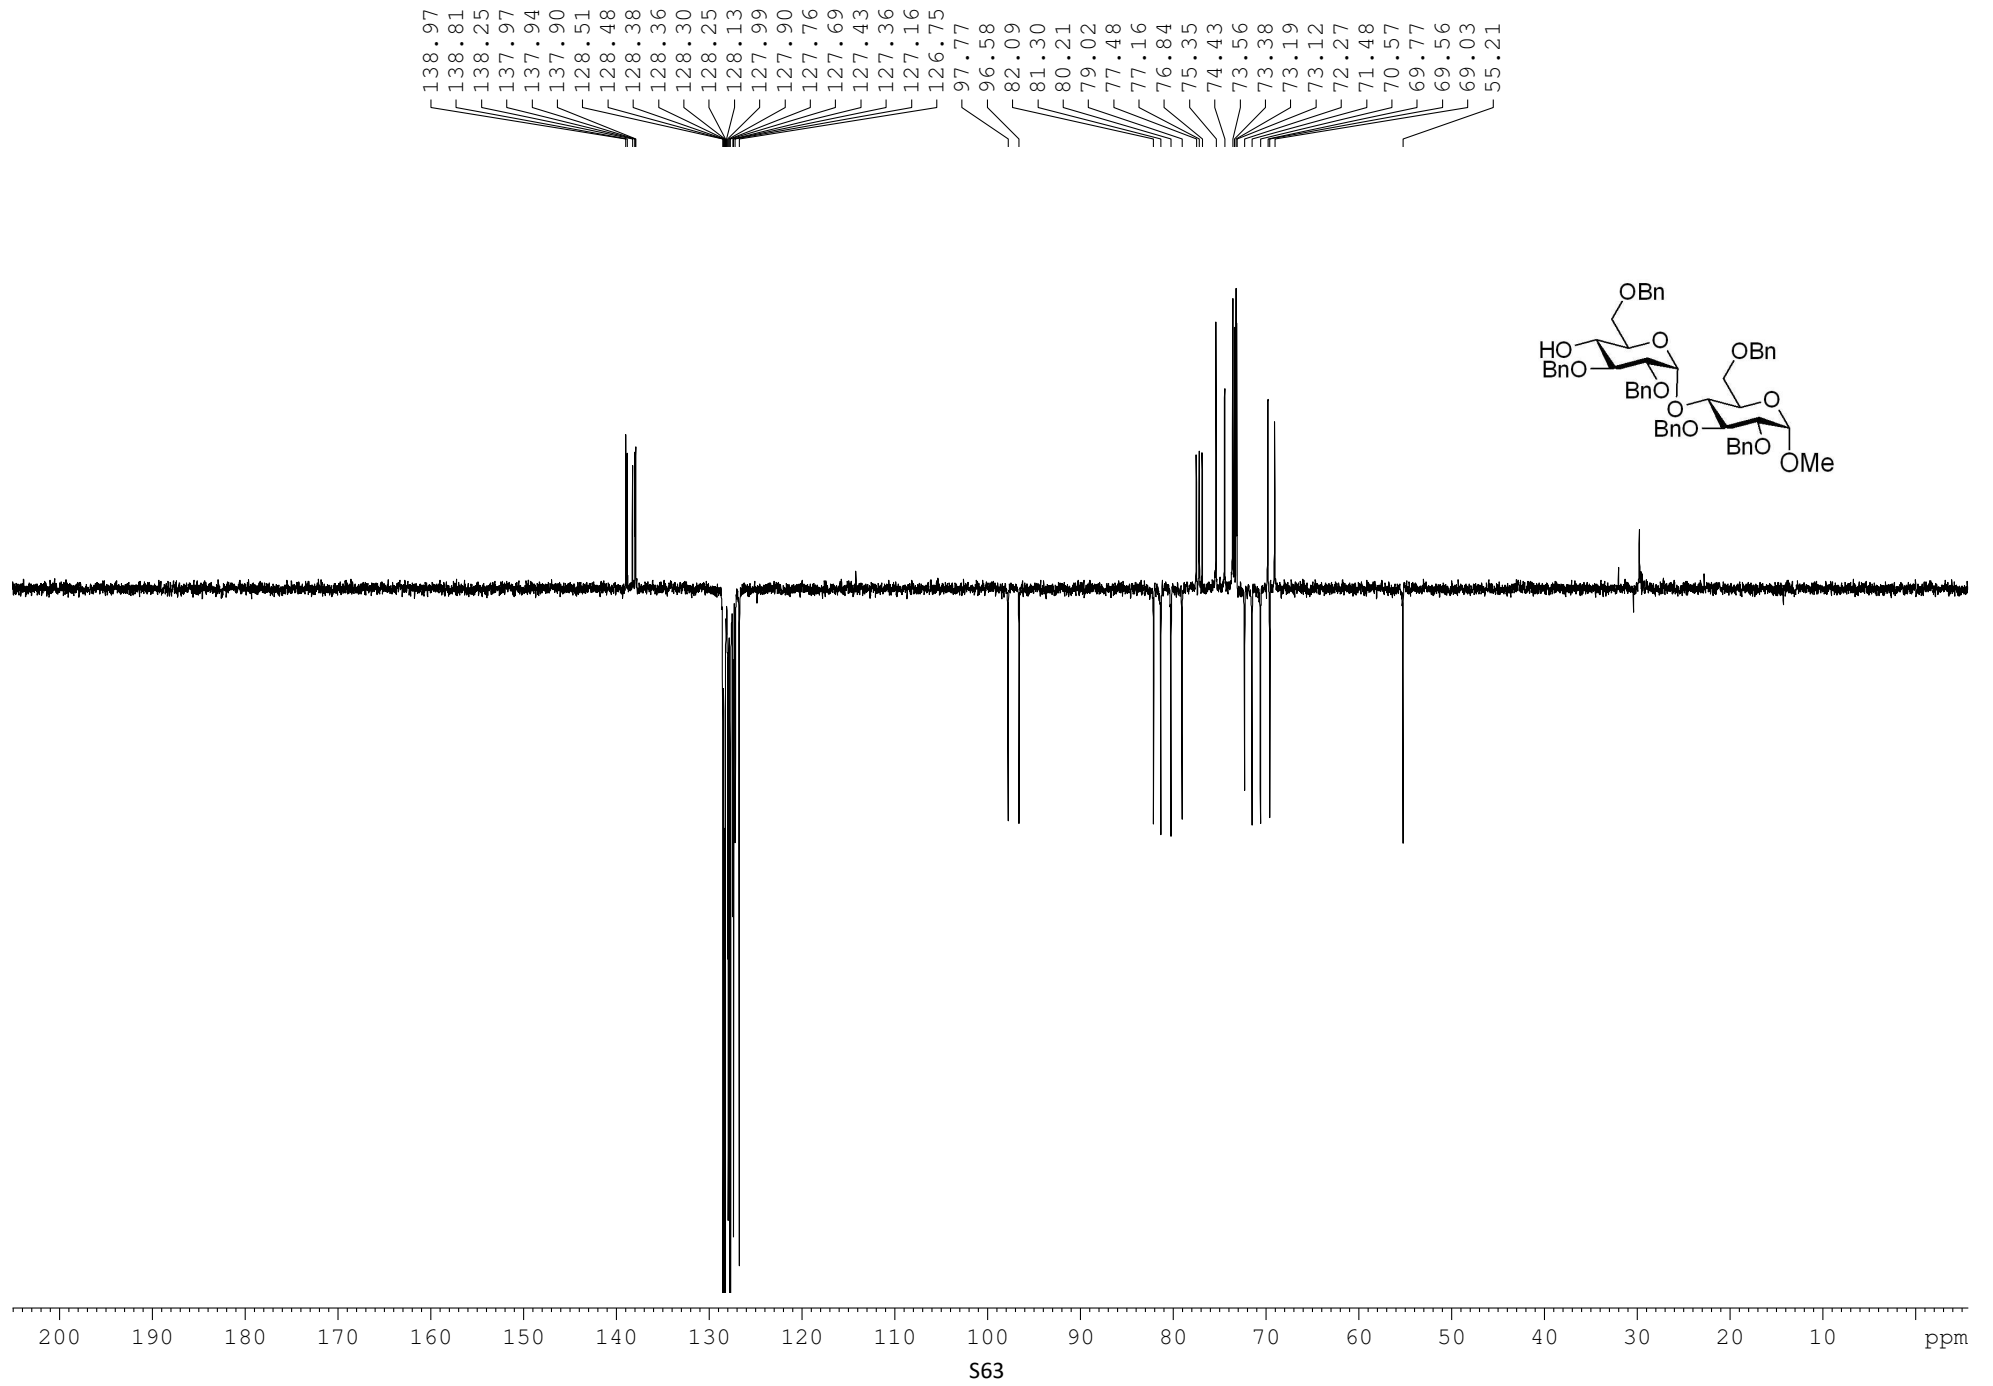

<sup>1</sup>H-NMR, <sup>13</sup>C-APT, <sup>1</sup>H-<sup>1</sup>H COSY, HSQC, HMBC, GATED of **14**

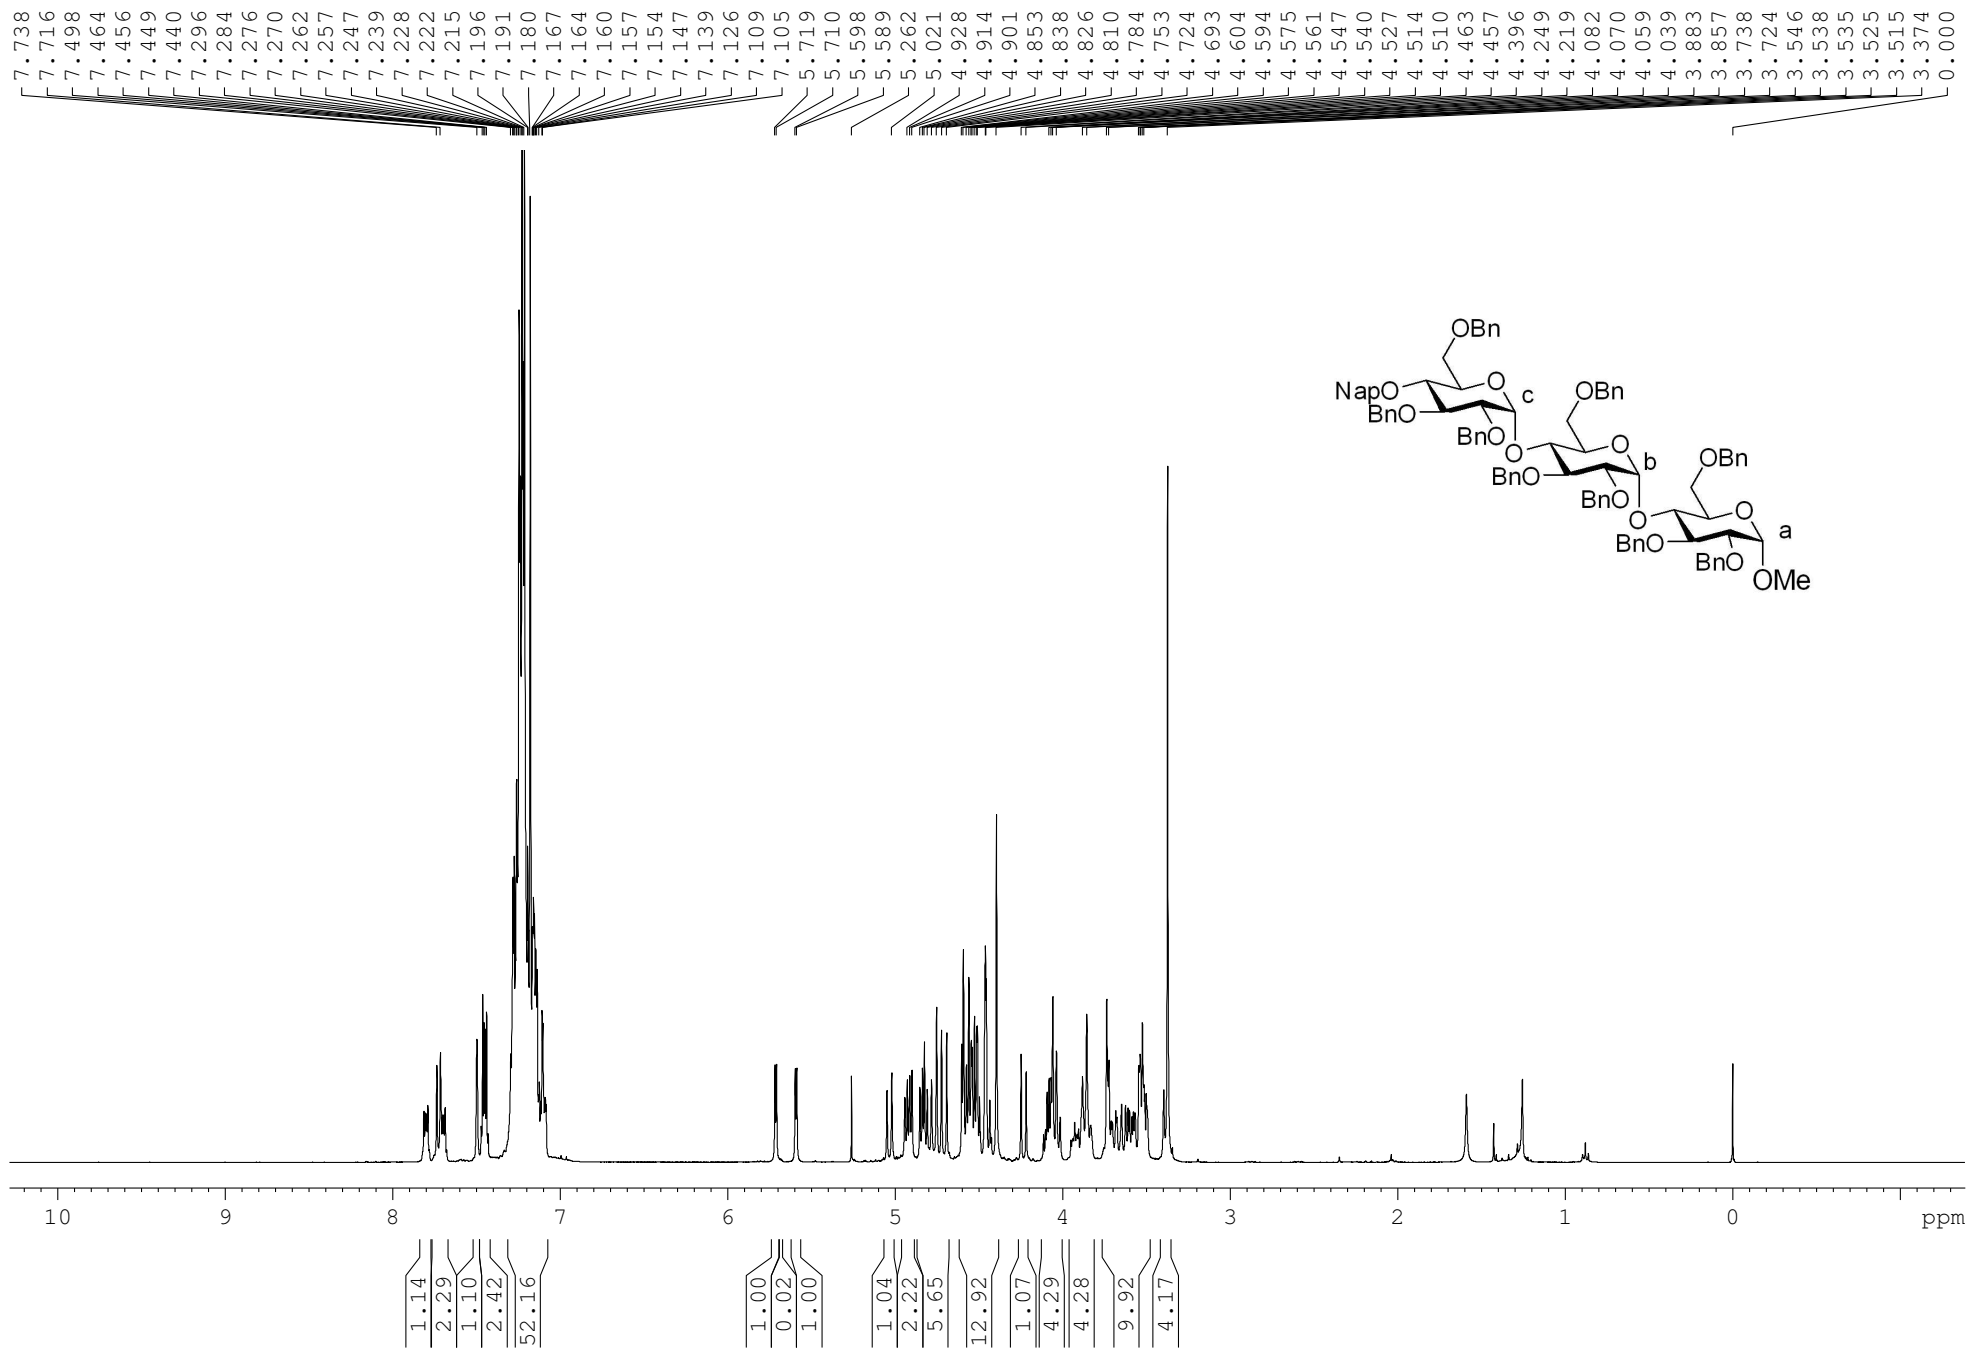

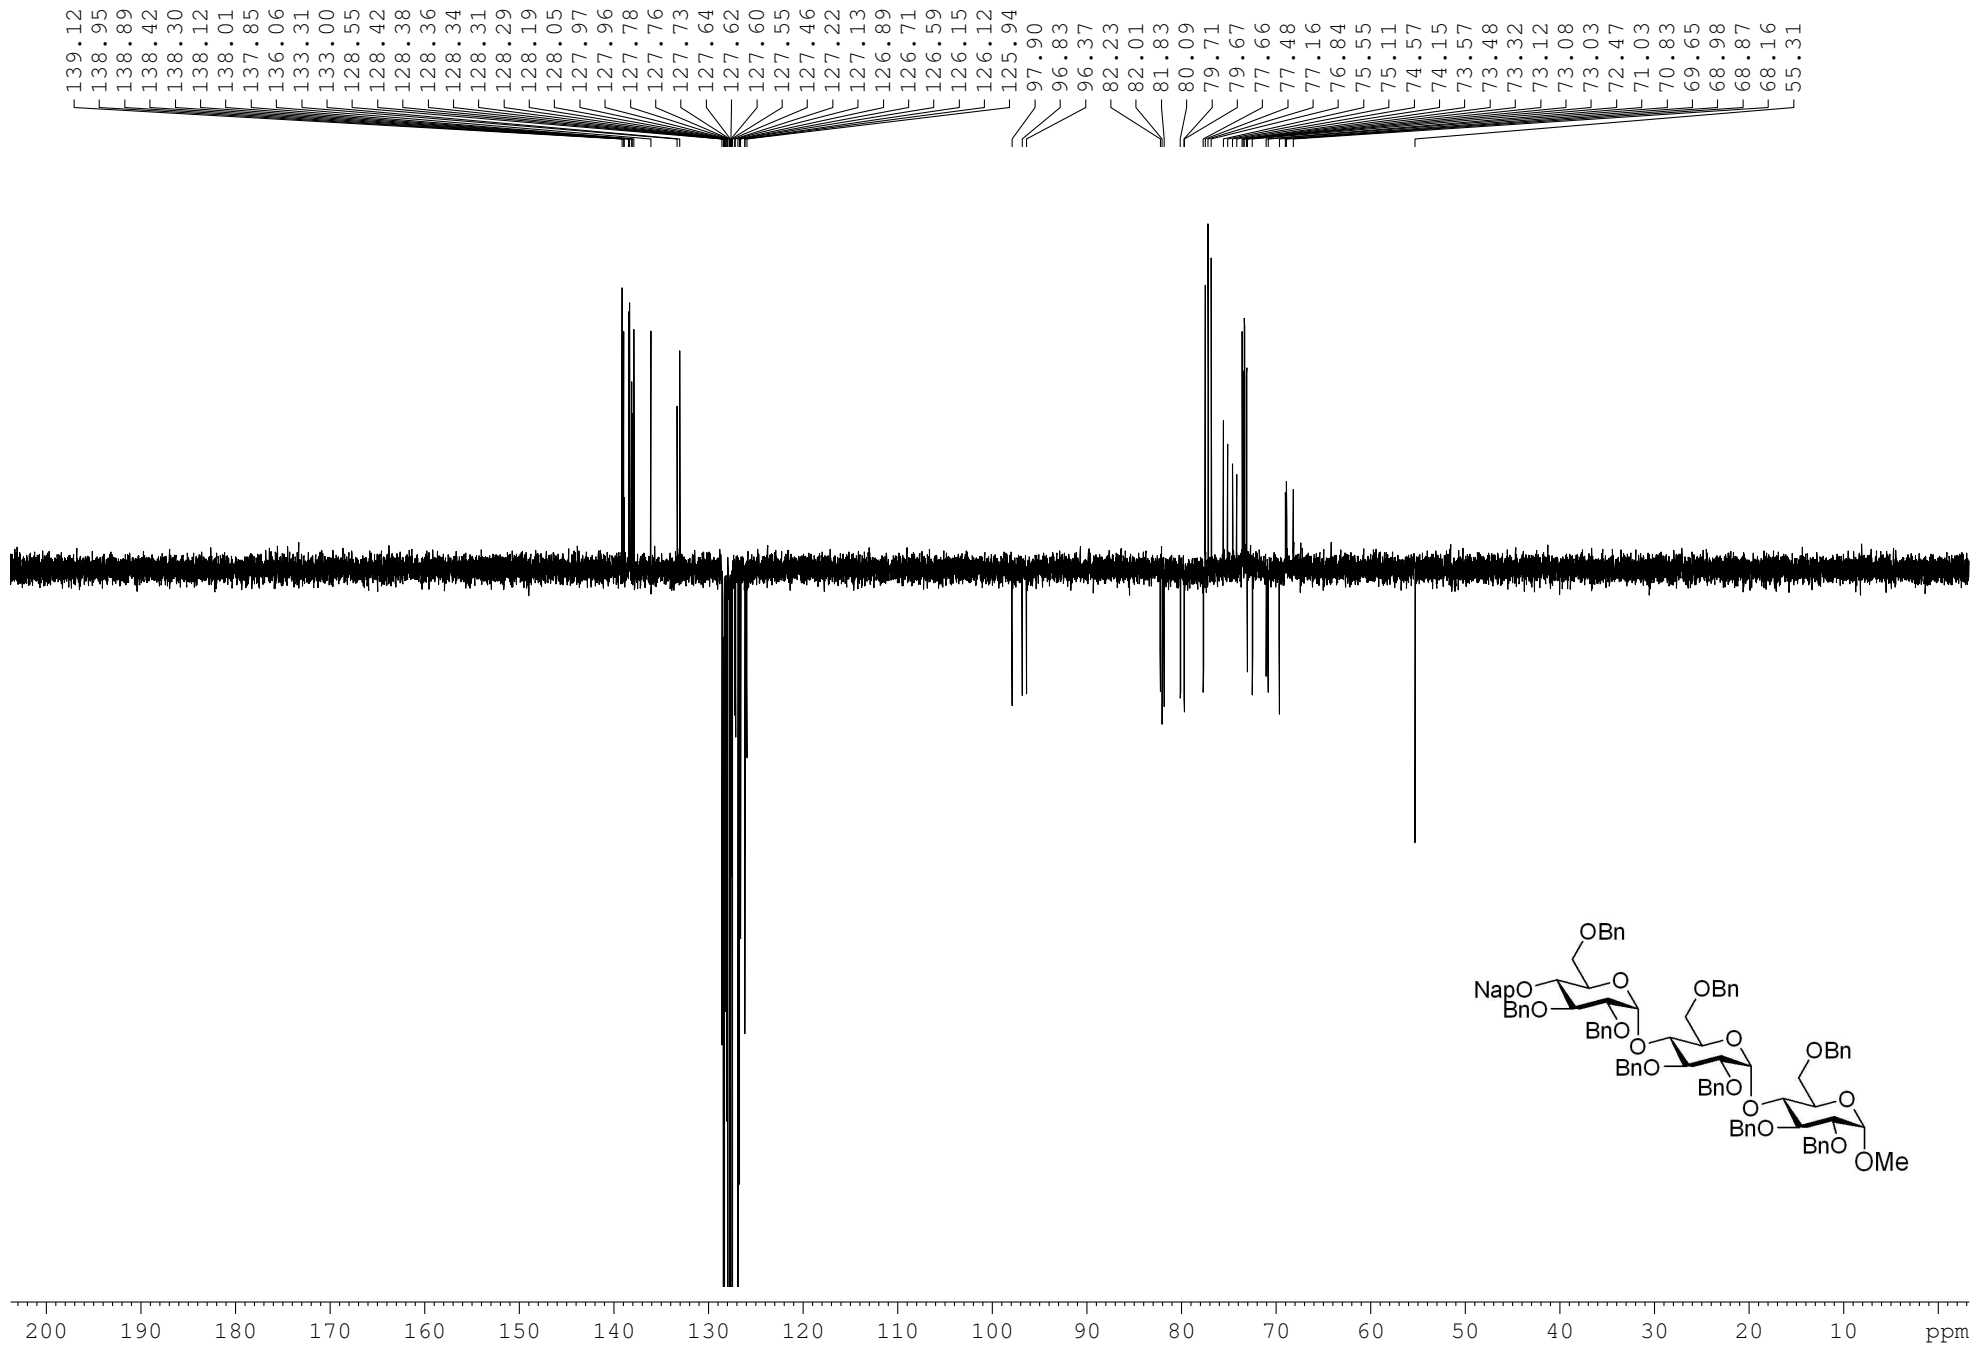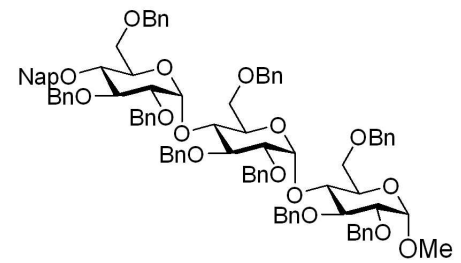

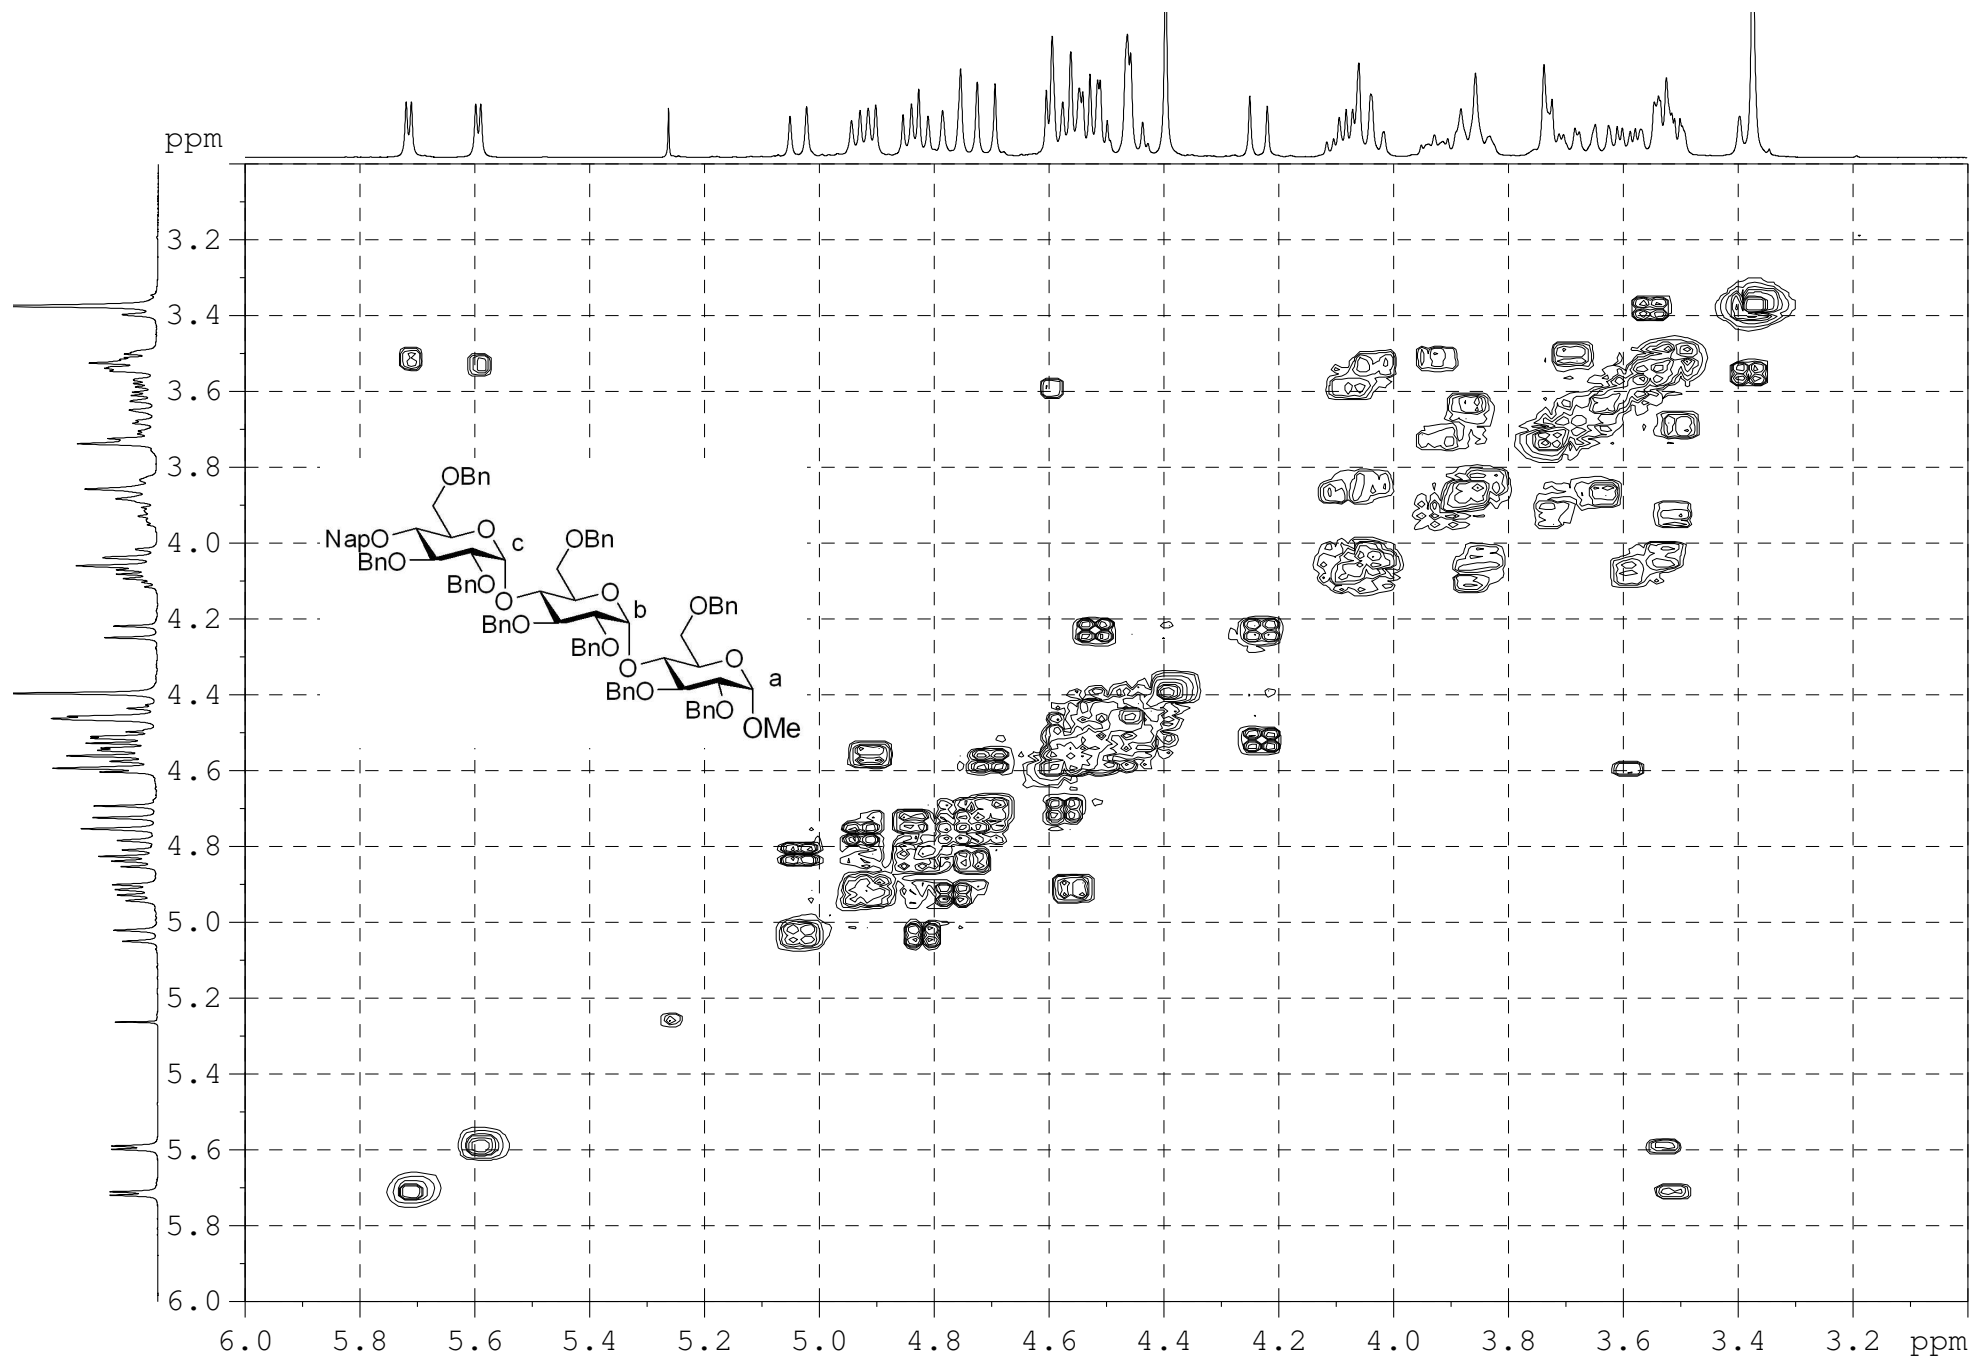

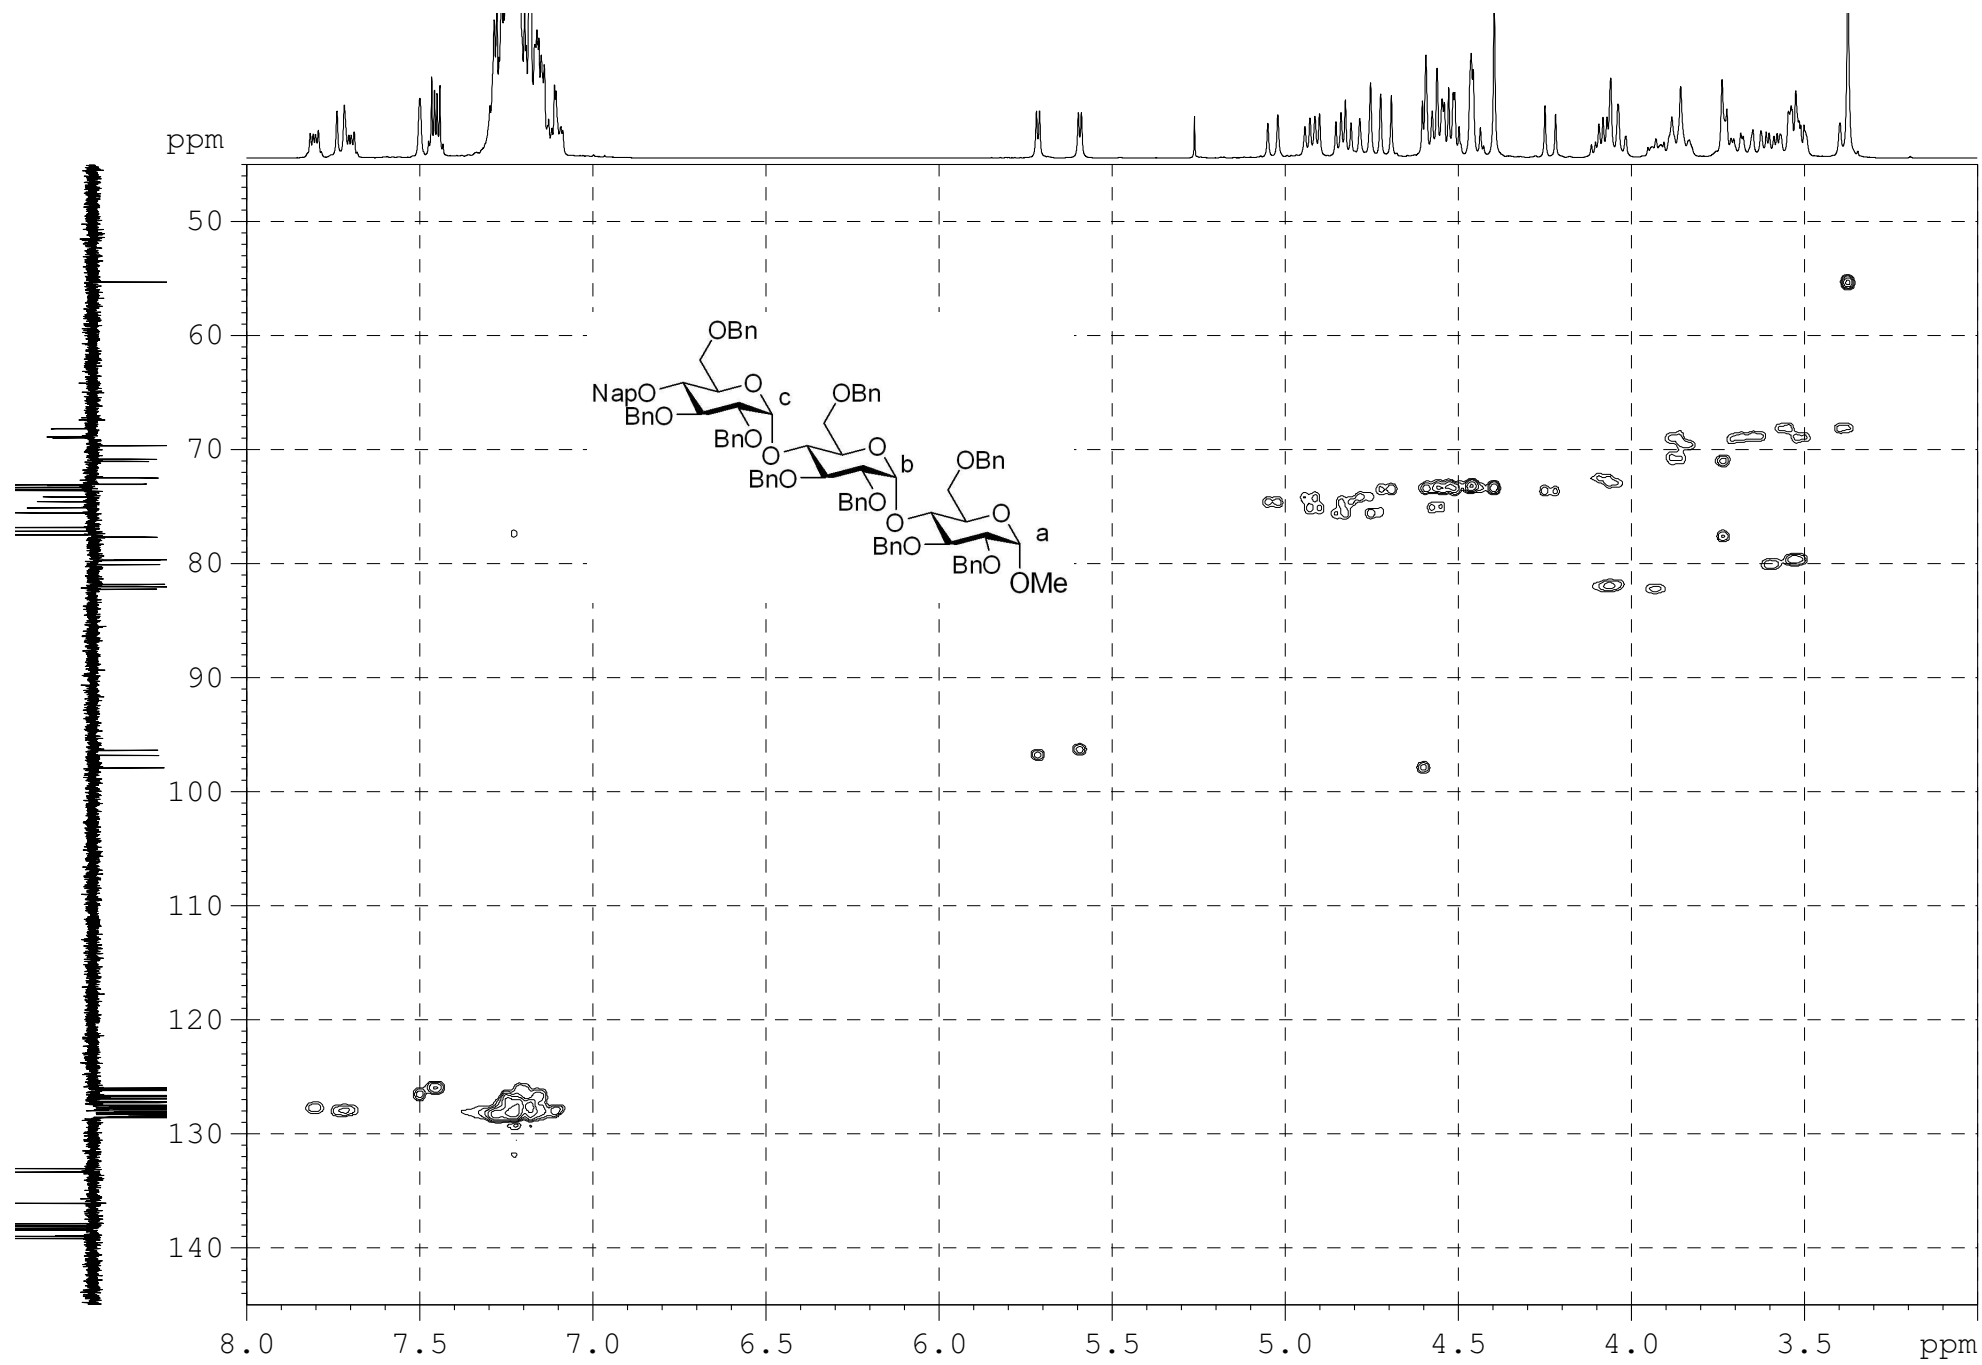

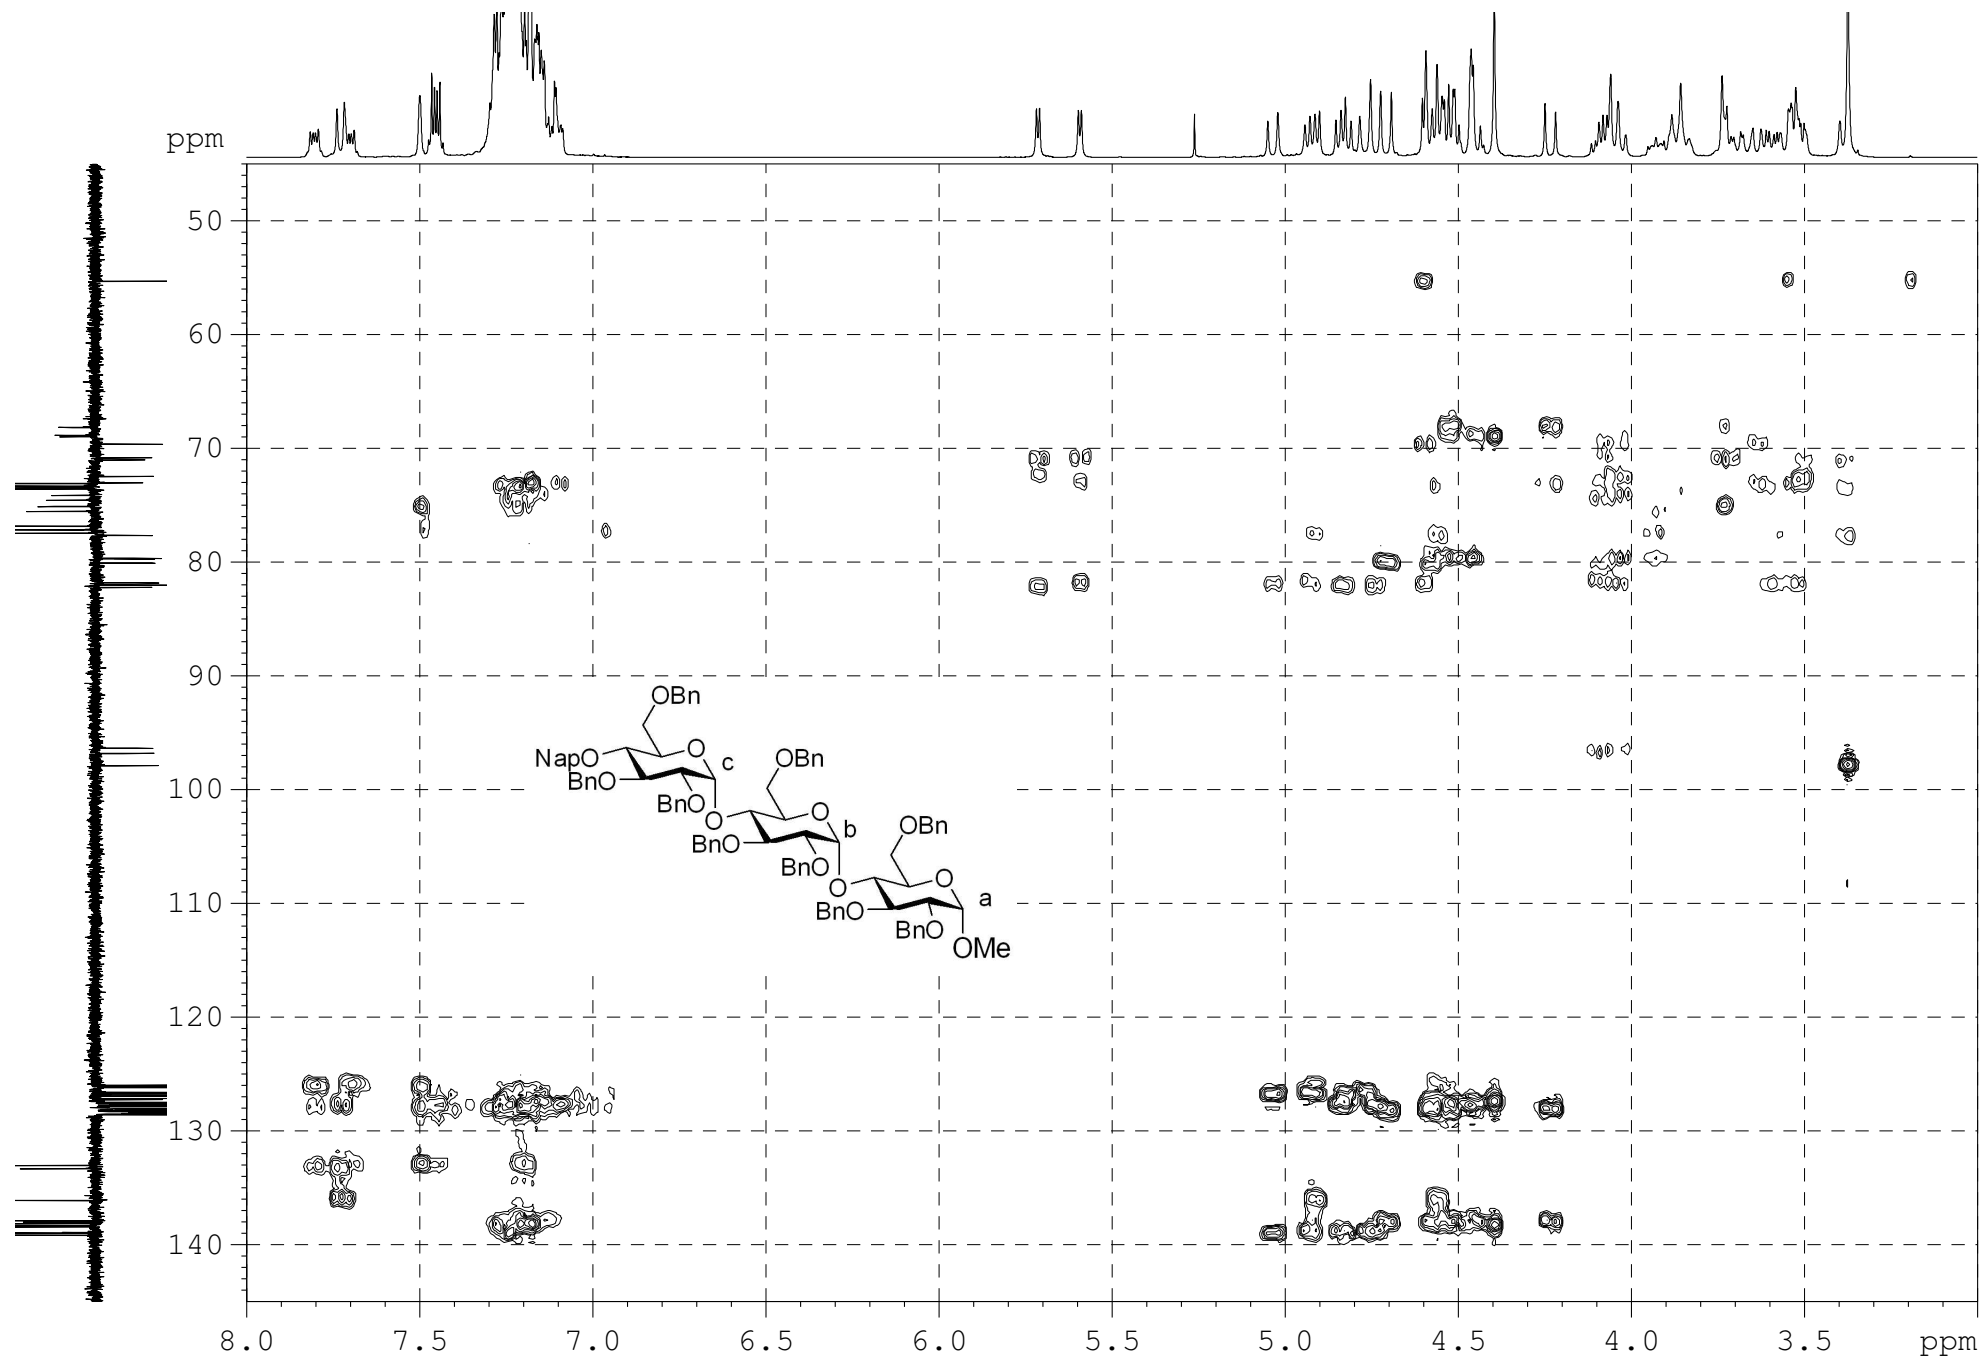



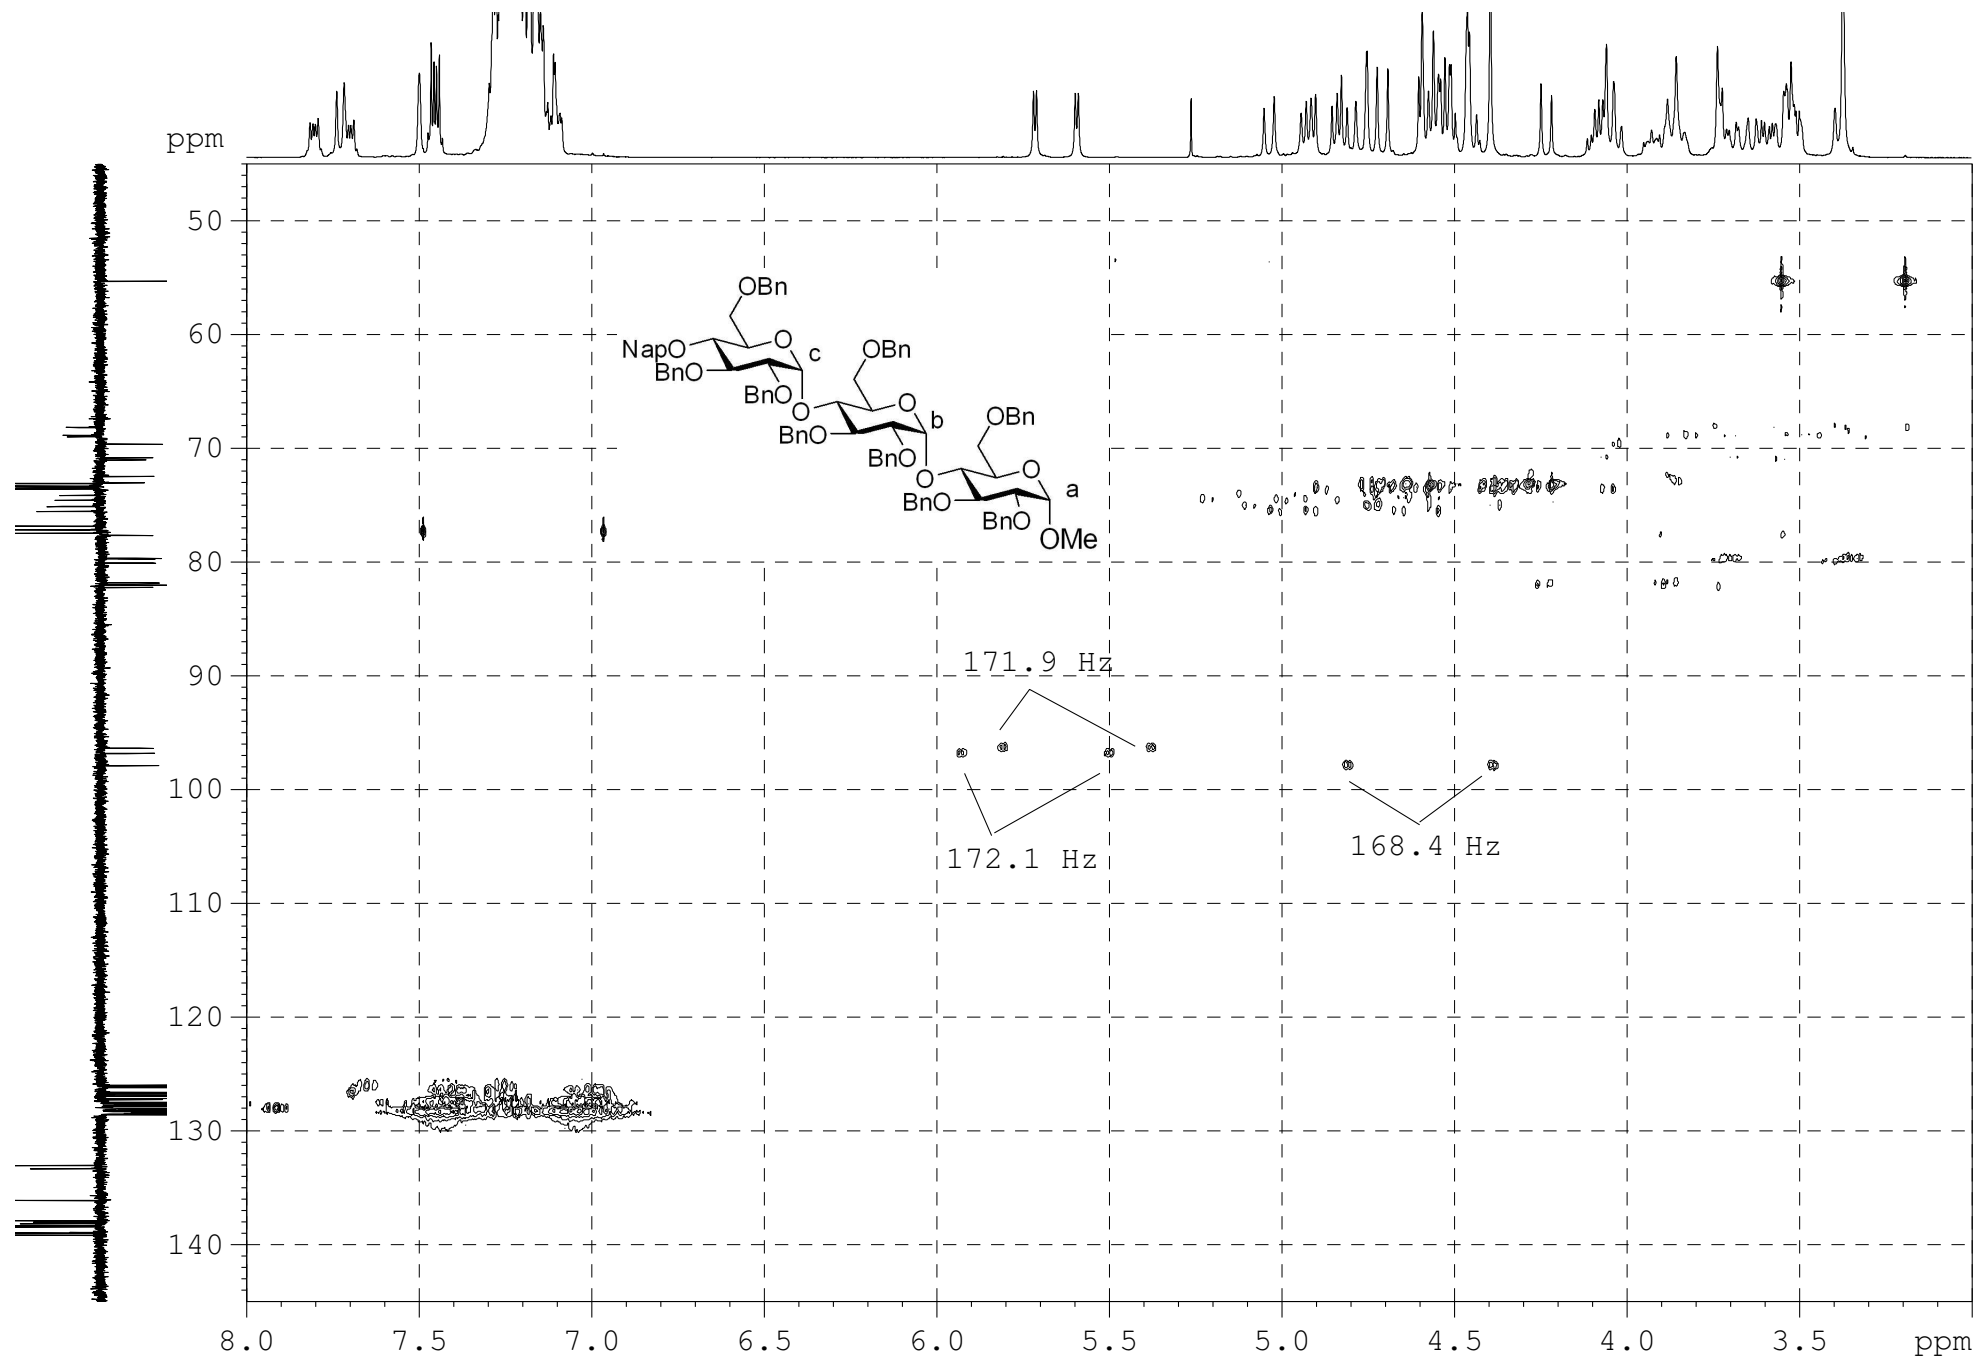

<sup>1</sup>H-NMR, <sup>13</sup>C-APT of 15

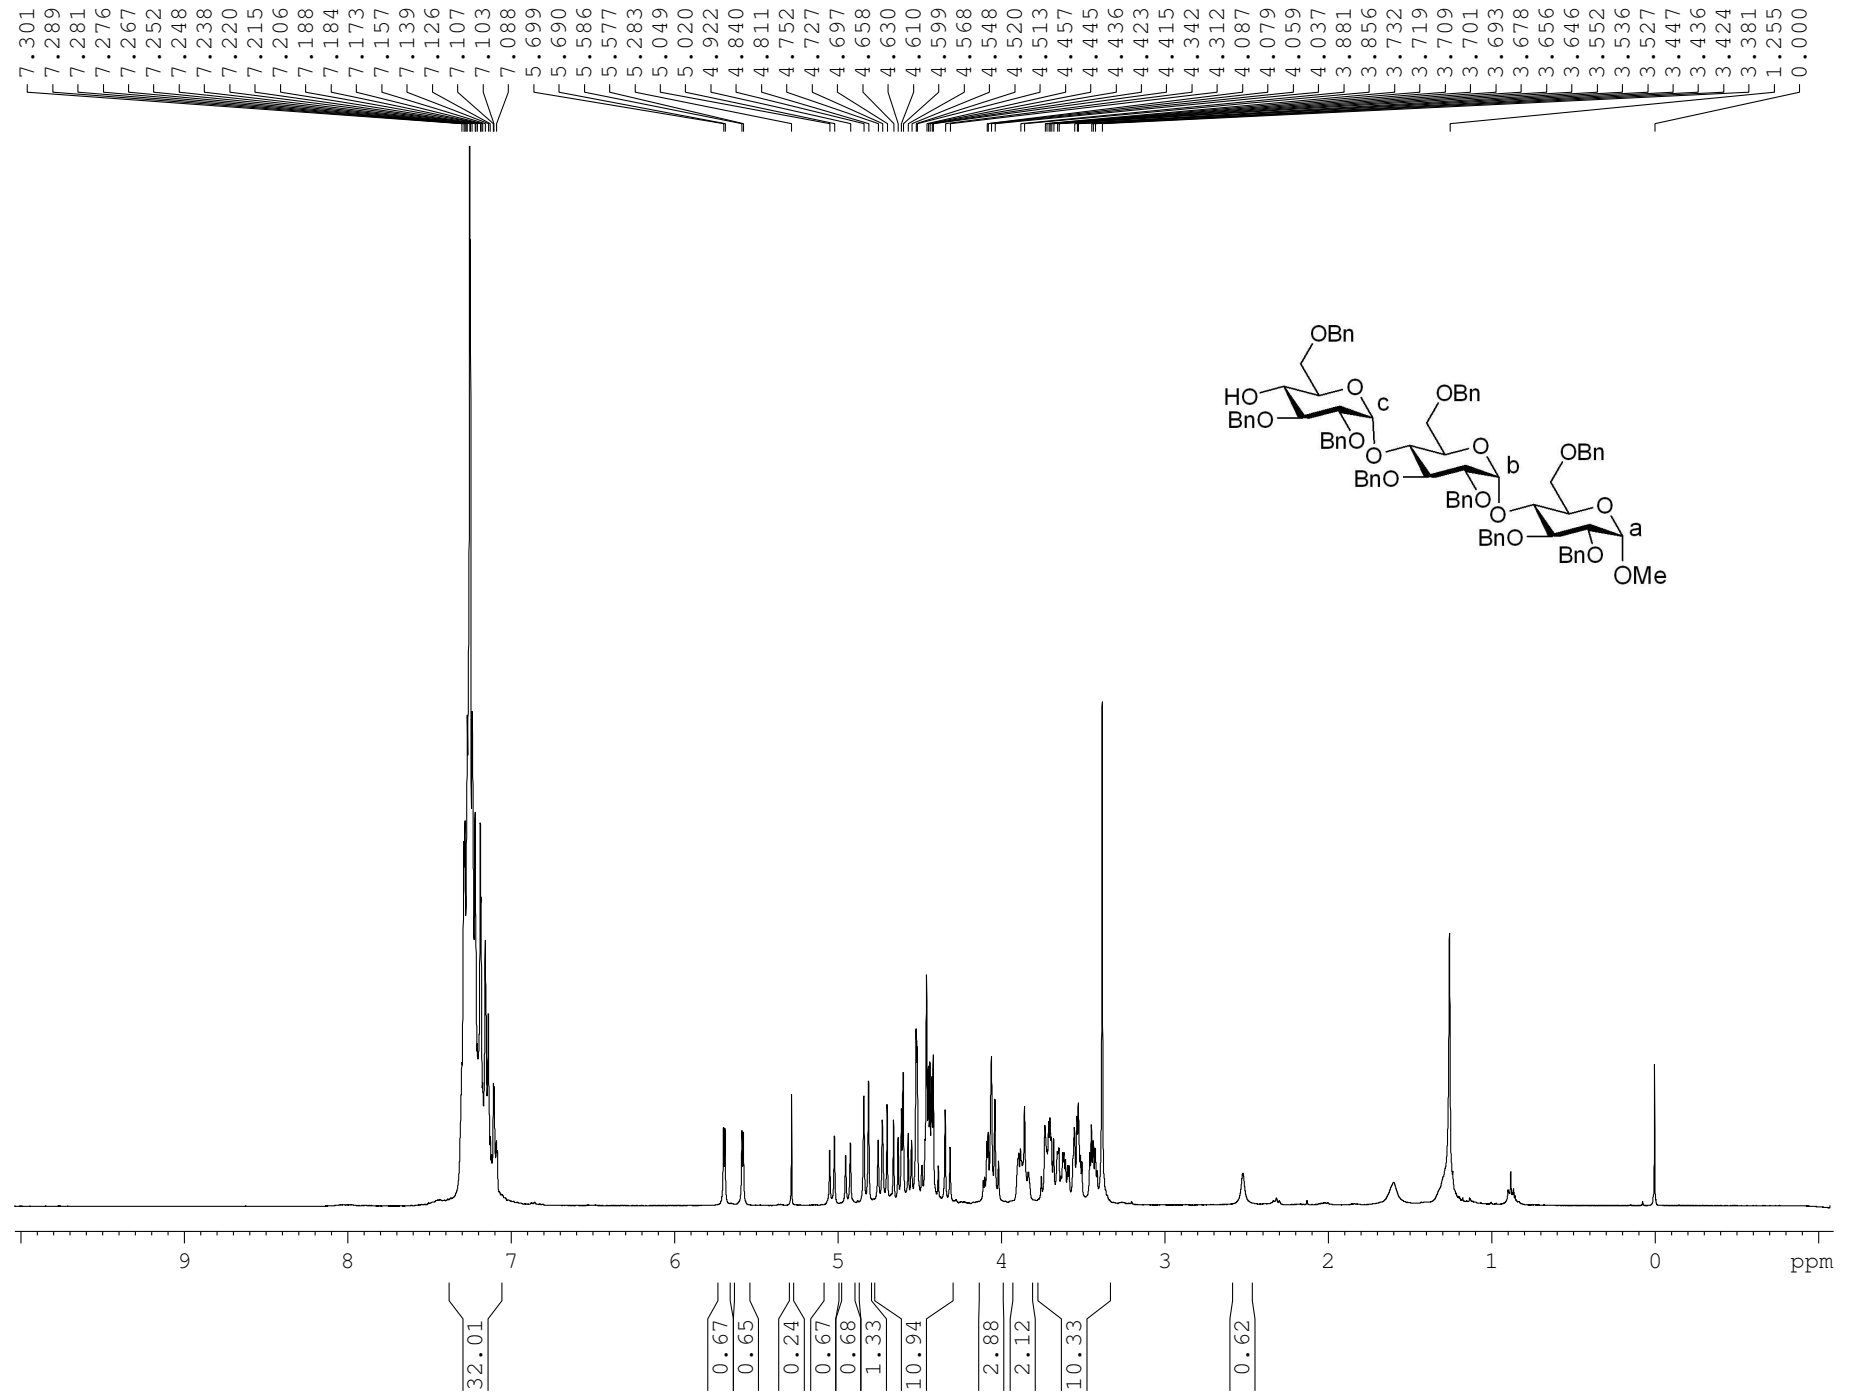

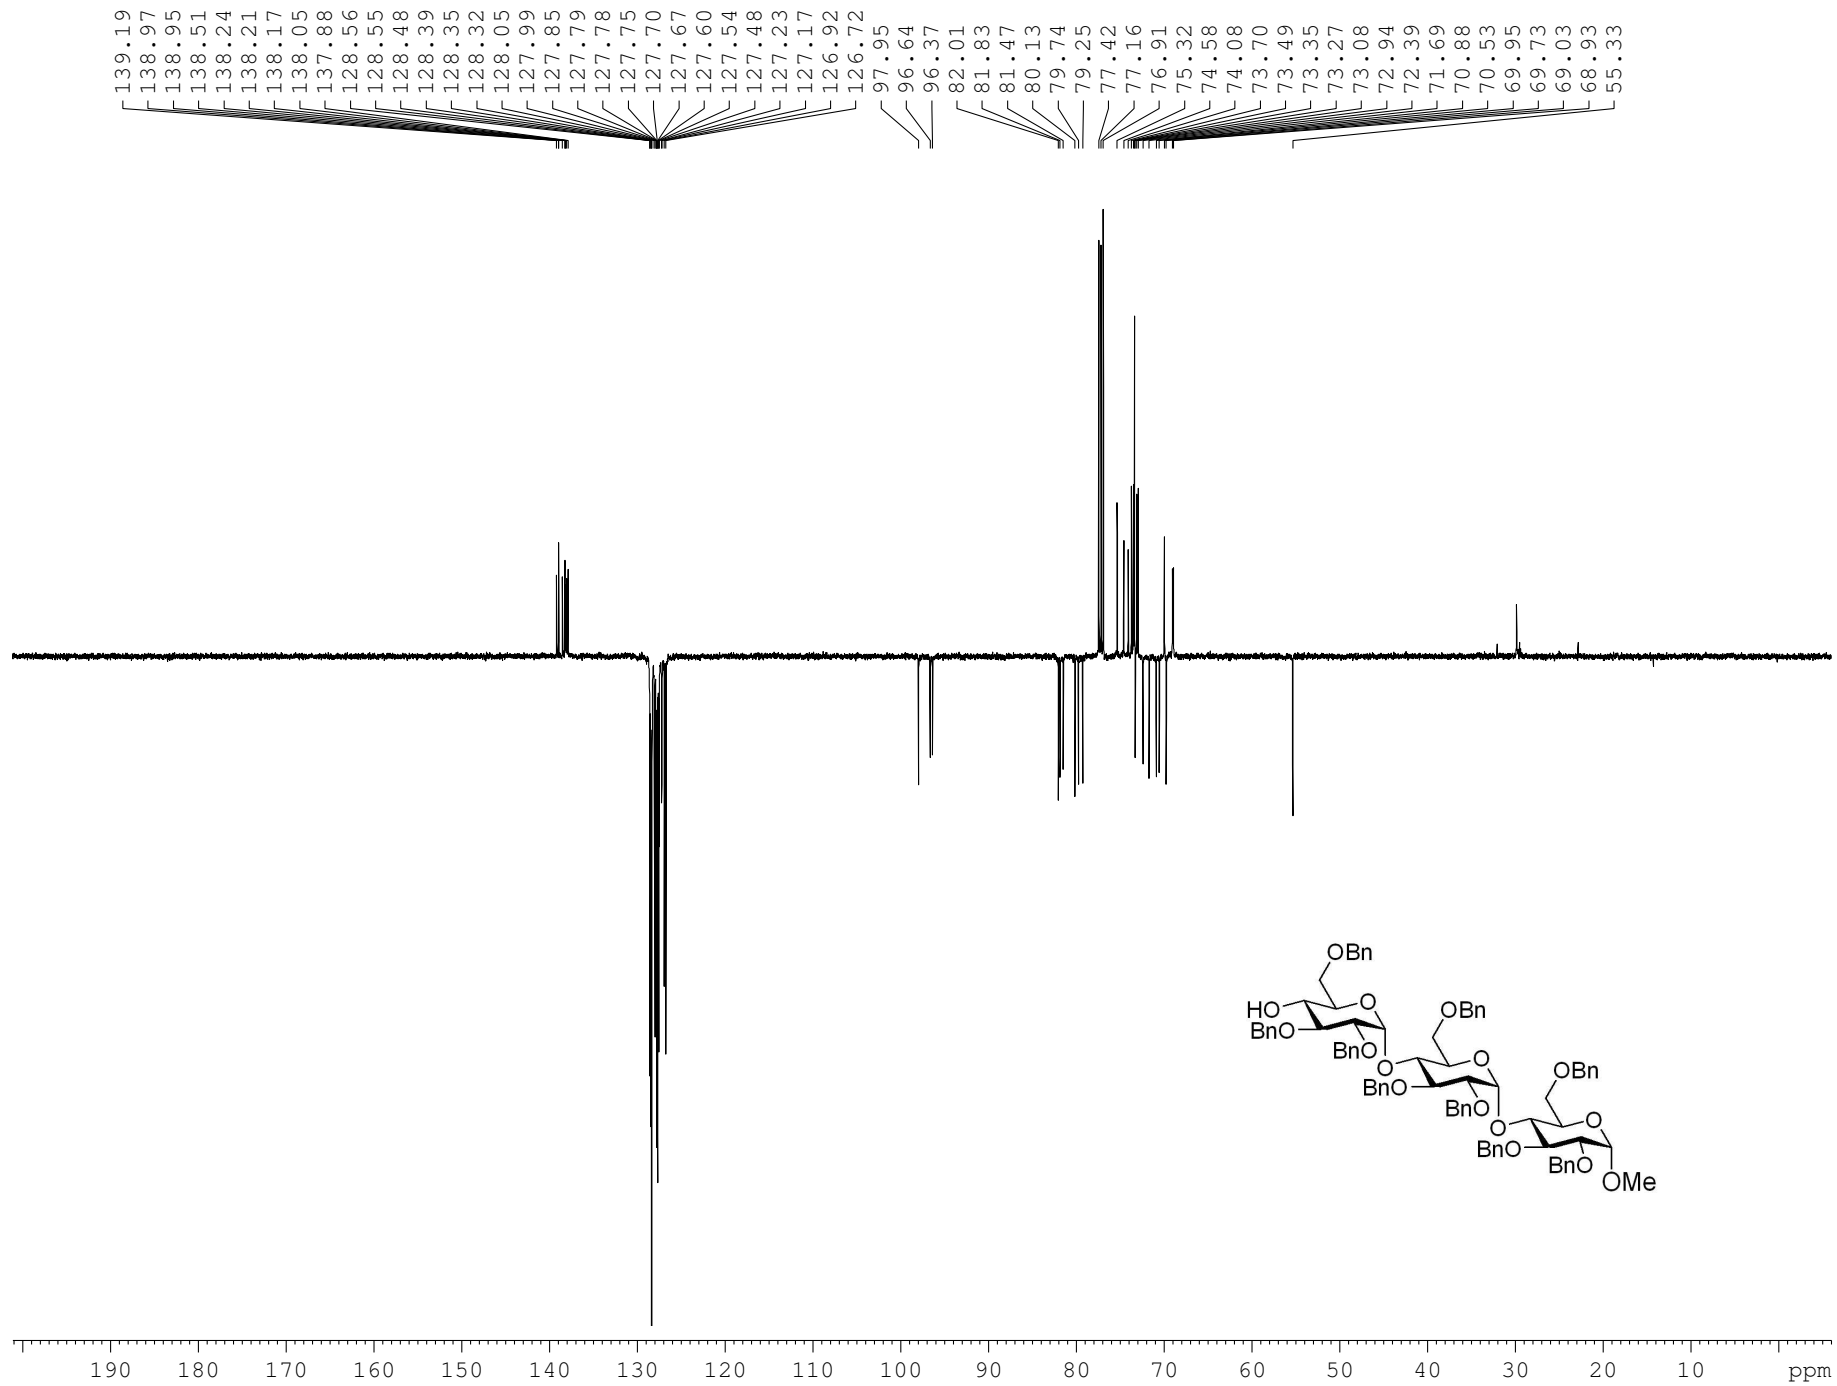

<sup>1</sup>H-NMR, <sup>13</sup>C-APT, <sup>1</sup>H-<sup>1</sup>H COSY, HSQC, HMBC, GATED of **16**

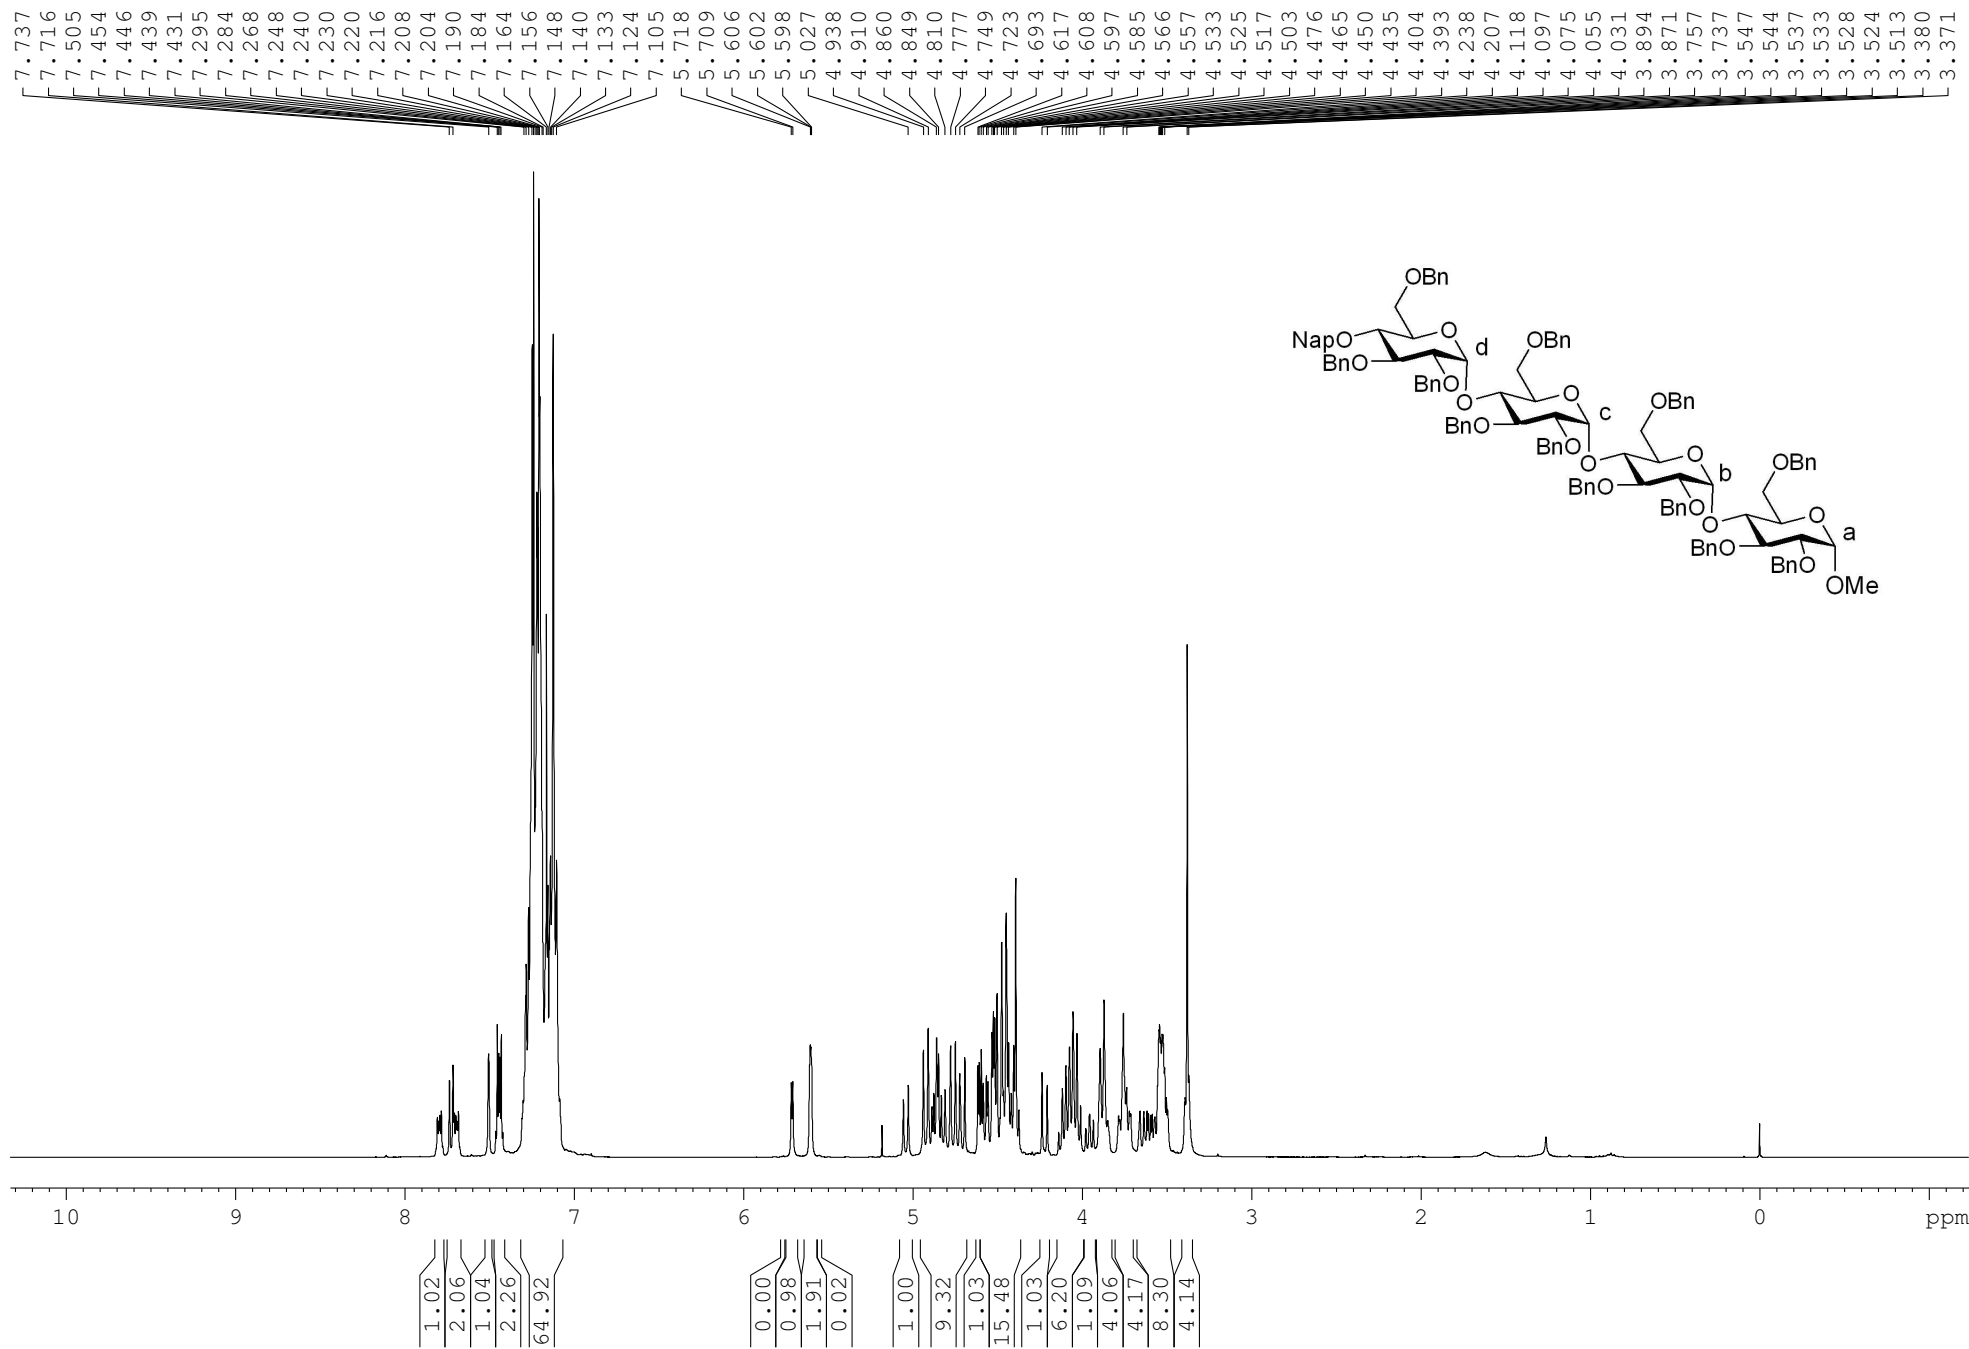

139.09  
138.97  
138.93  
138.87  
138.42  
138.23  
138.14  
138.12  
138.09  
138.02  
137.96  
137.87  
136.02  
133.28  
132.97  
128.49  
128.20  
128.14  
128.00  
127.98  
127.91  
127.62  
127.58  
127.54  
127.48  
127.40  
127.16  
127.10  
127.02  
126.87  
126.73  
126.58  
126.12  
126.07  
125.90  
97.87  
96.94  
96.45  
96.32  
82.19  
81.97  
81.85  
81.59  
80.04  
79.79  
79.57  
79.42  
77.67  
77.48  
77.36  
77.16  
76.84  
75.52  
75.09  
74.56  
74.11  
74.05  
73.52  
73.41  
73.35  
73.31  
73.25  
73.18  
73.14  
73.06  
73.02  
72.87  
72.53  
70.99  
70.88  
70.81  
69.66  
68.90  
68.84  
68.78  
68.15  
55.26

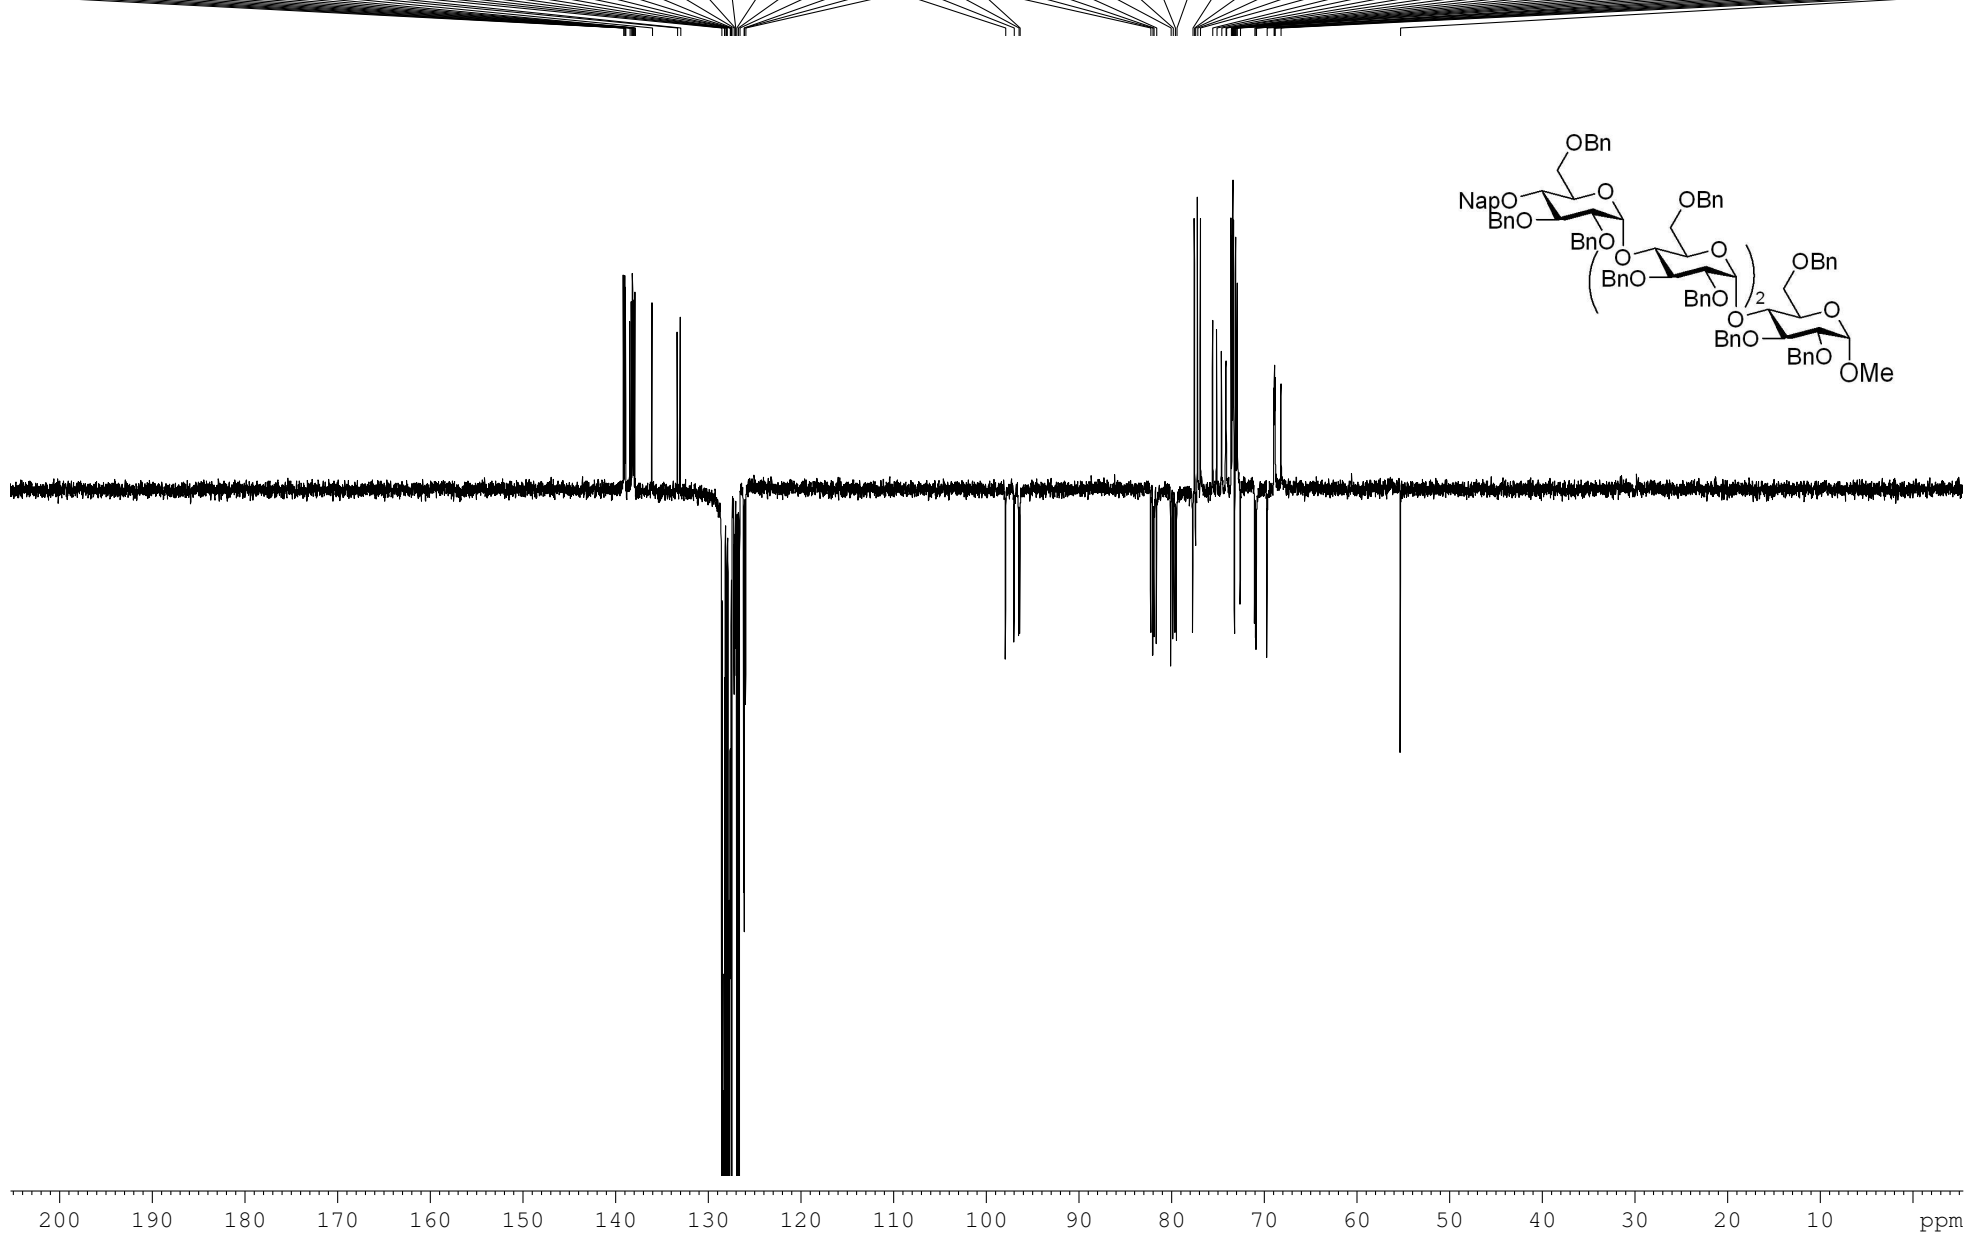

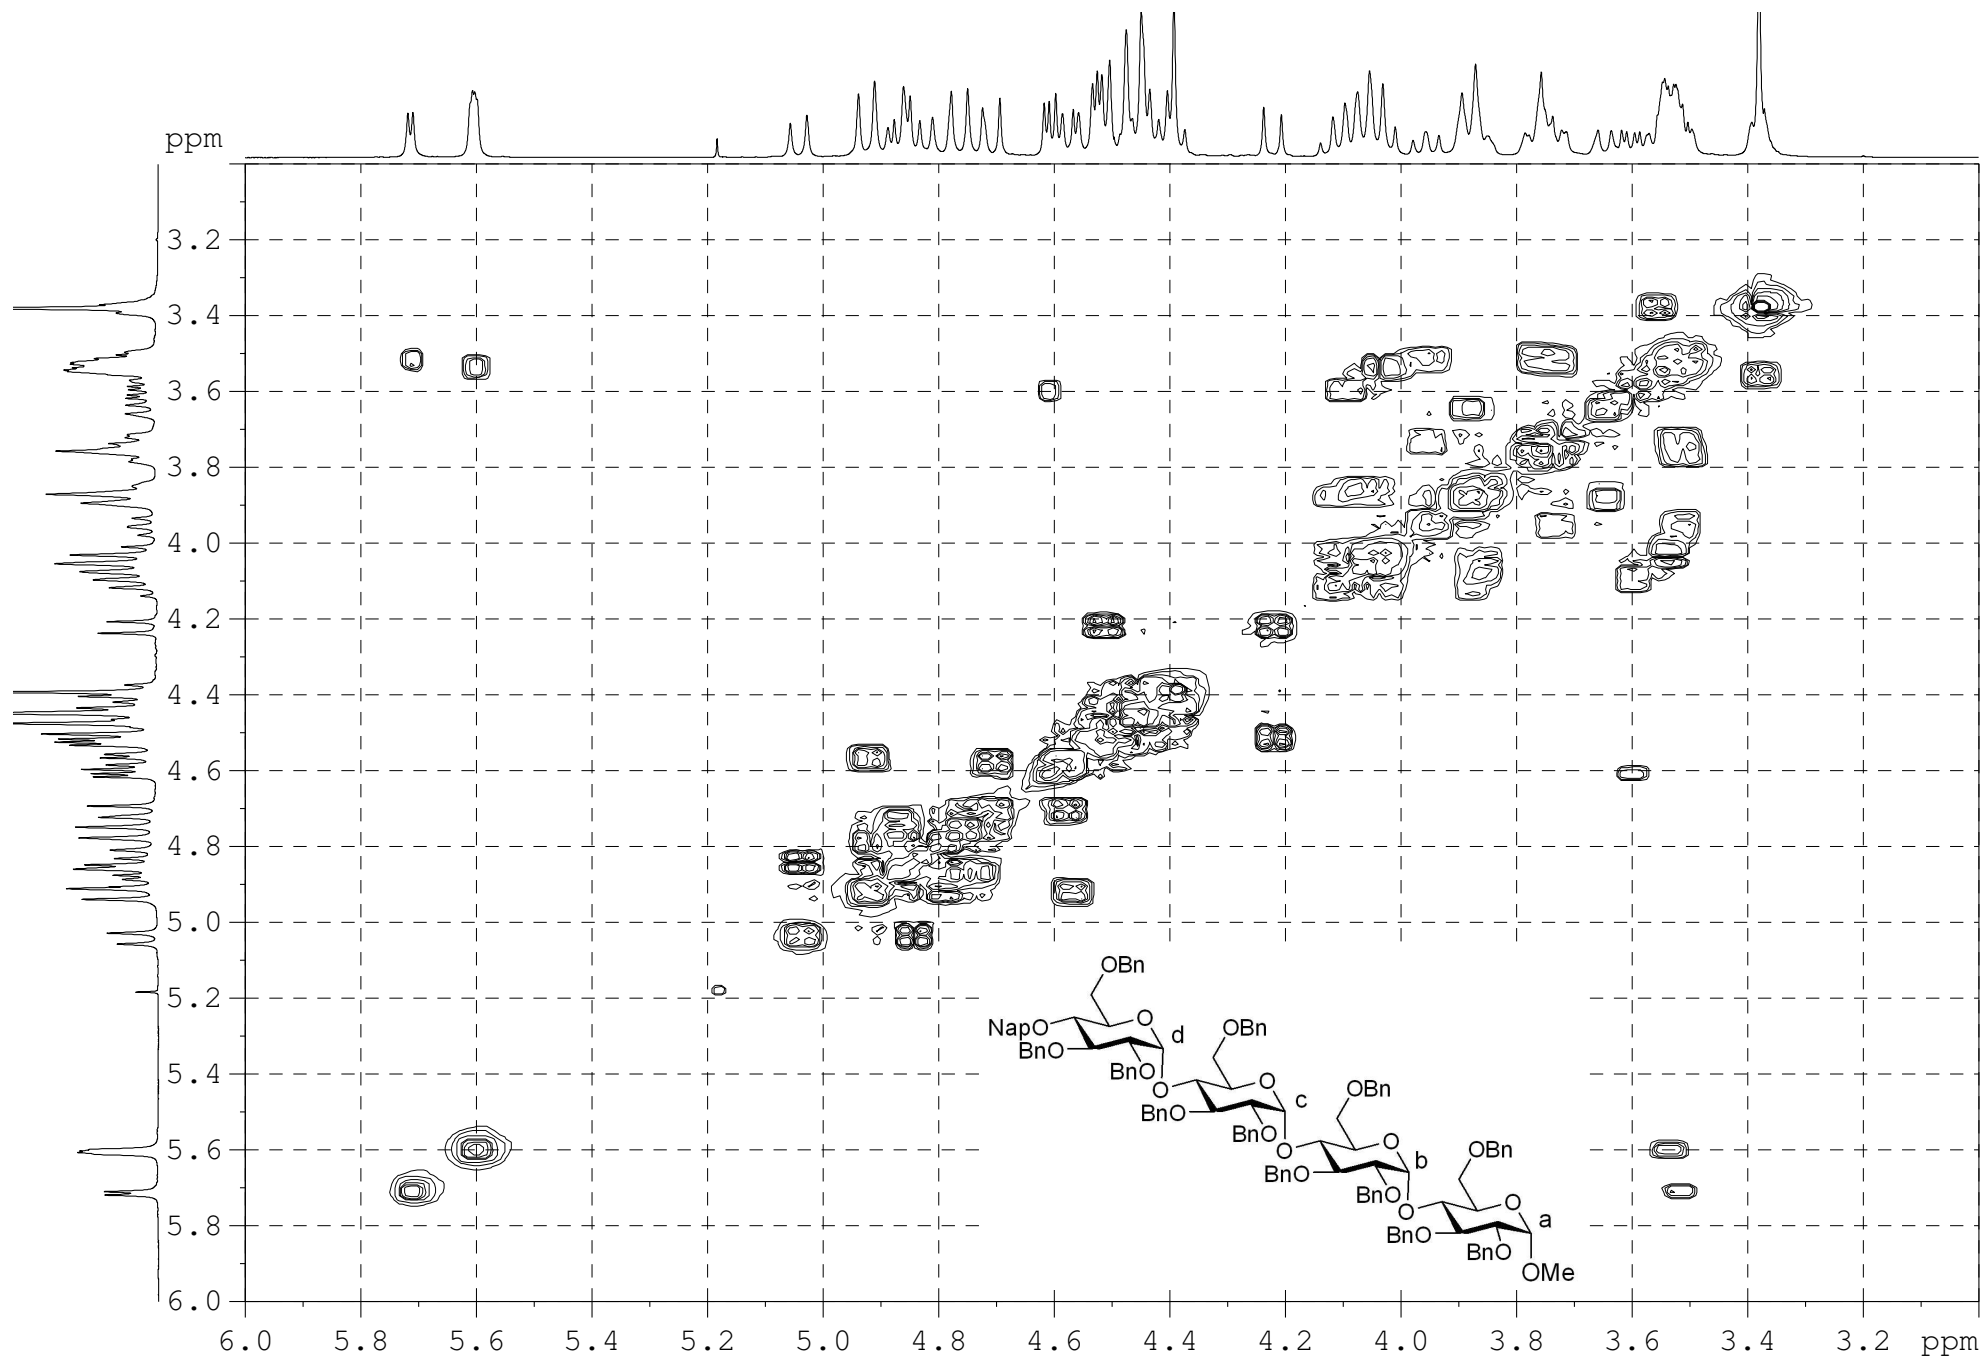

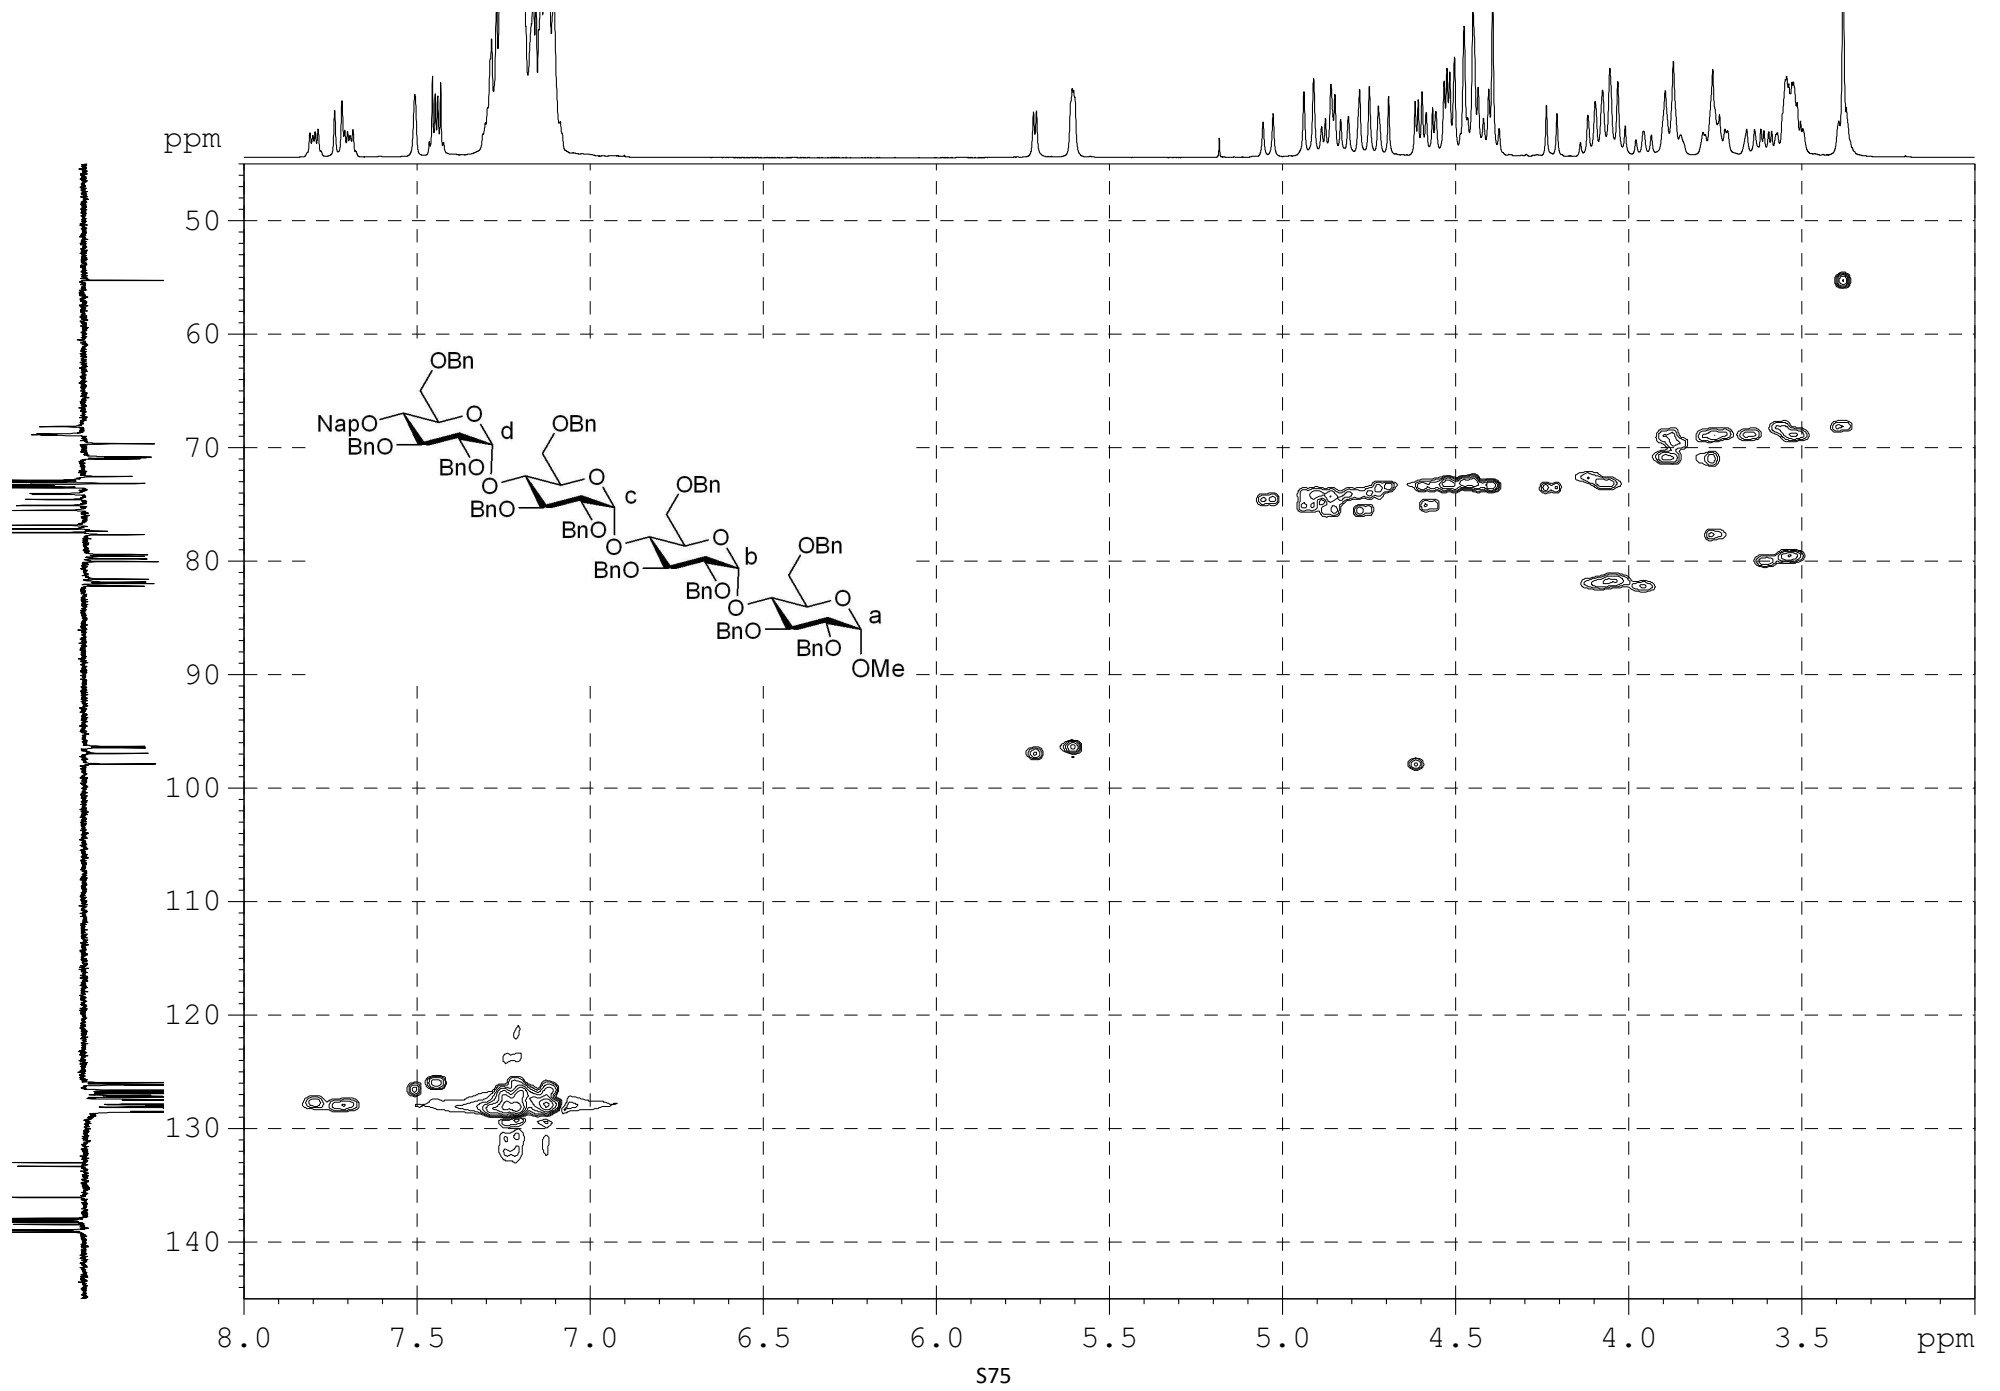

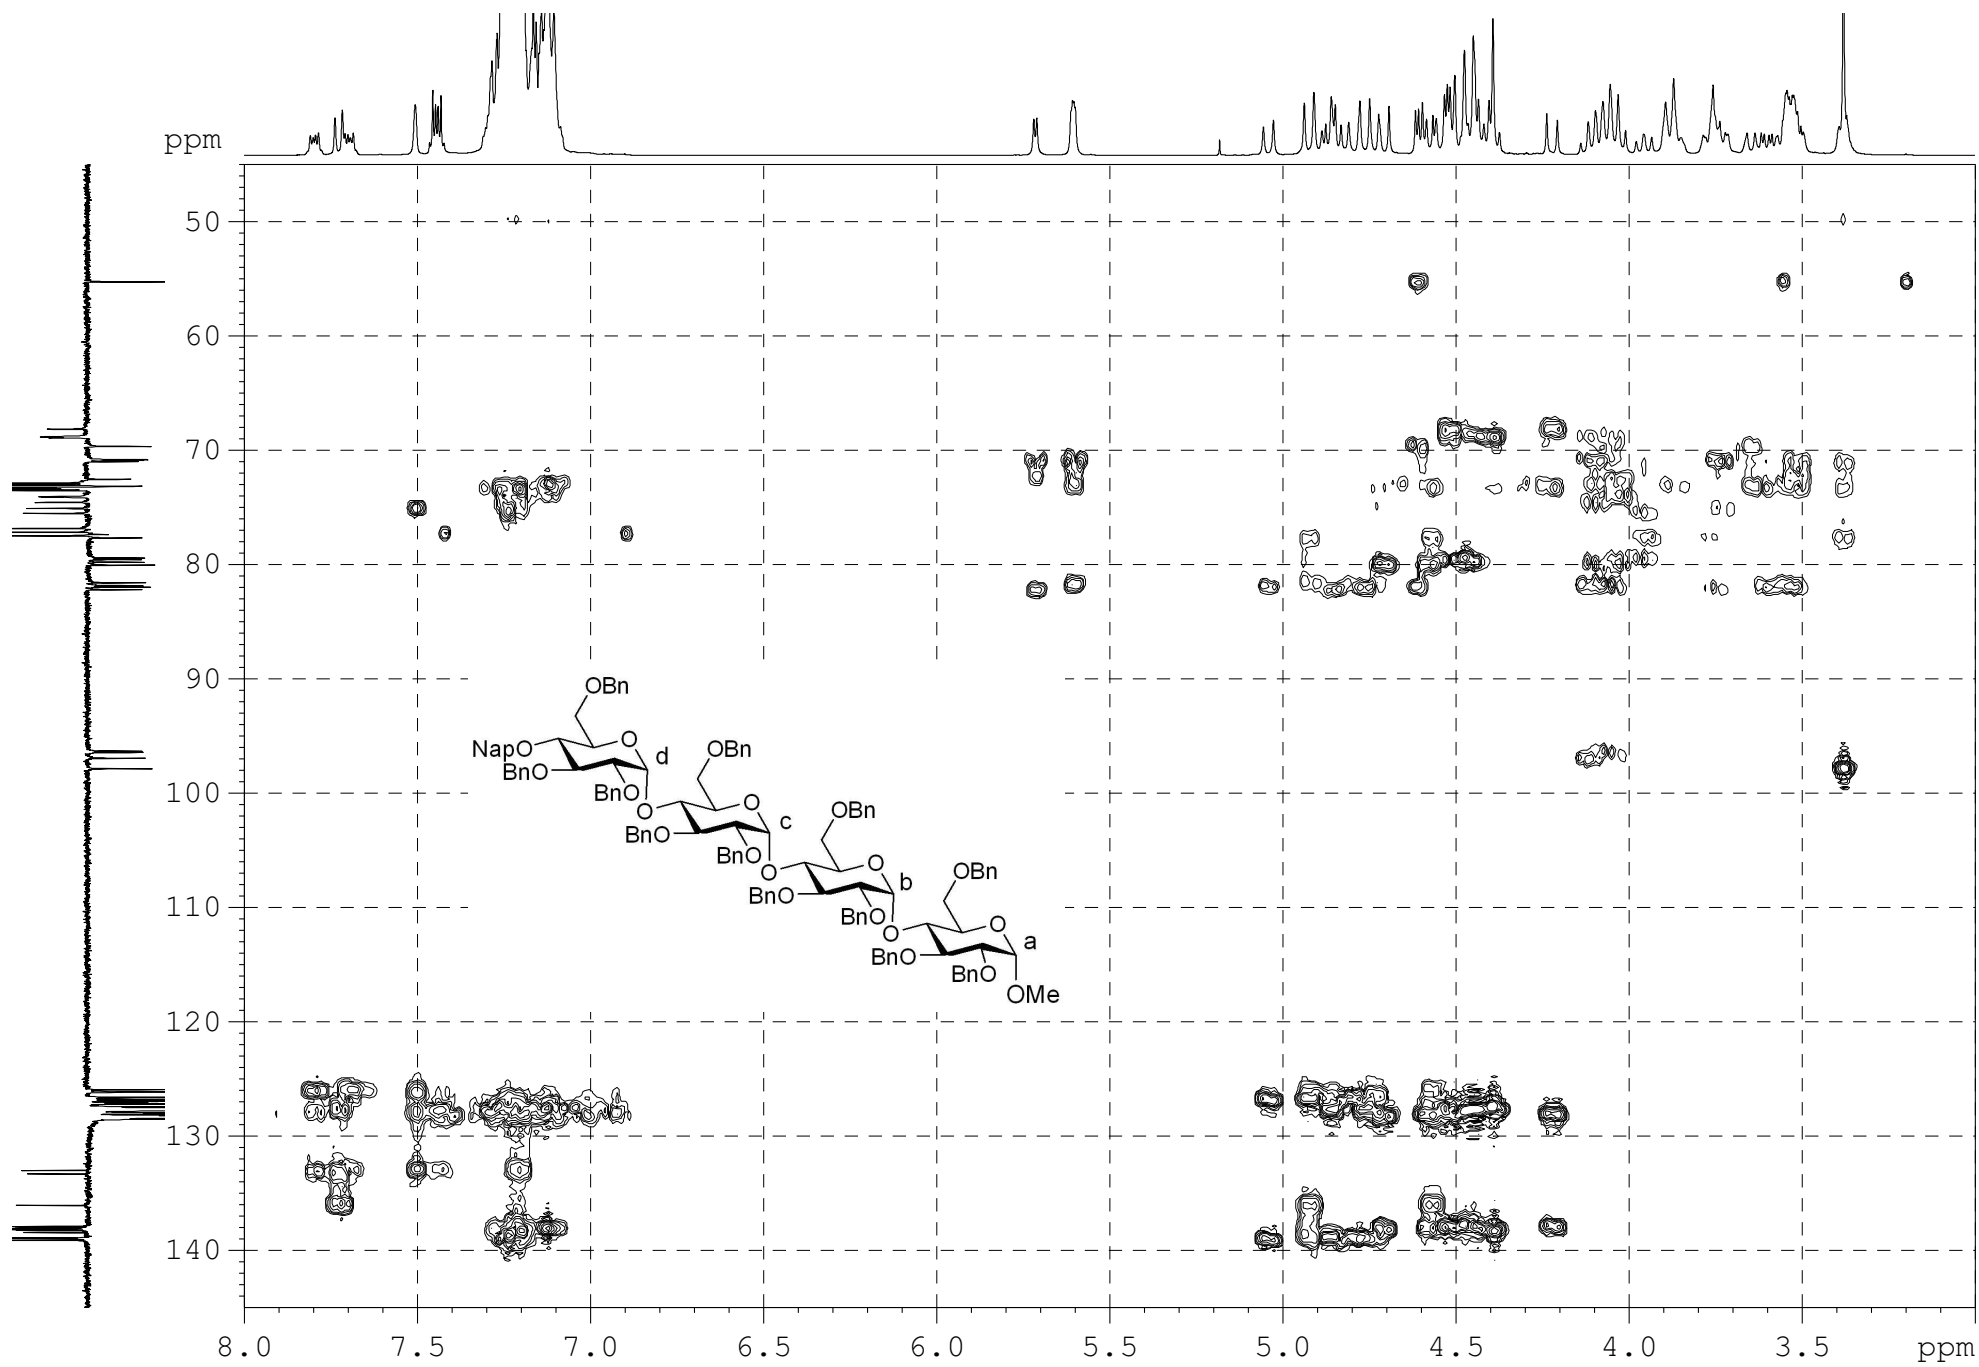



ppm

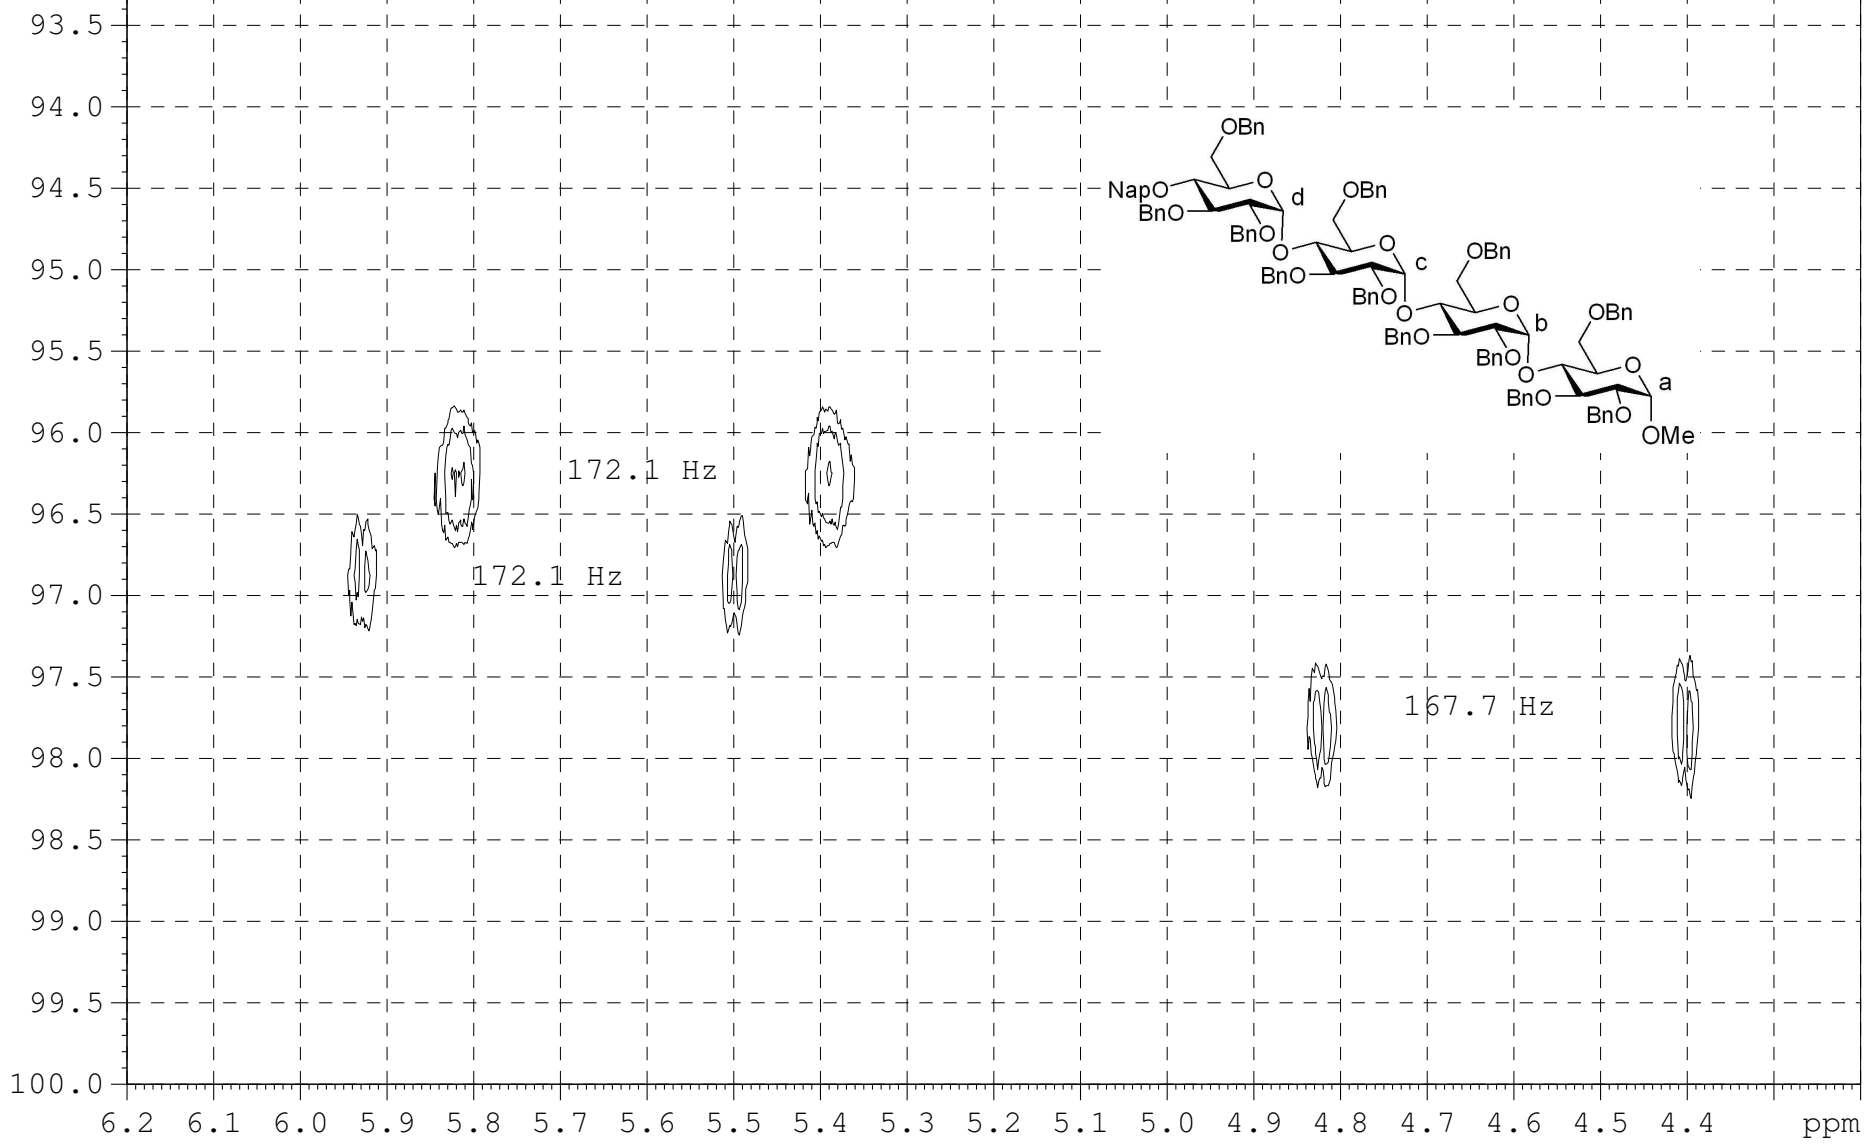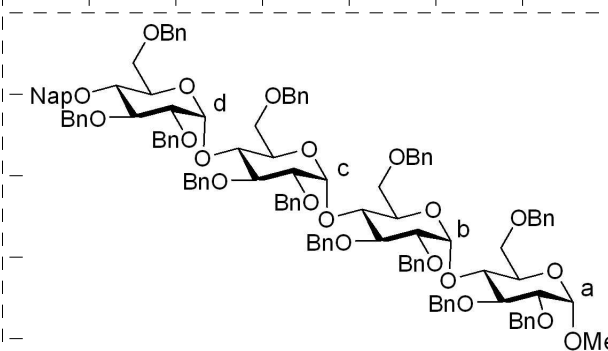

<sup>1</sup>H-NMR, <sup>13</sup>C-APT of 17

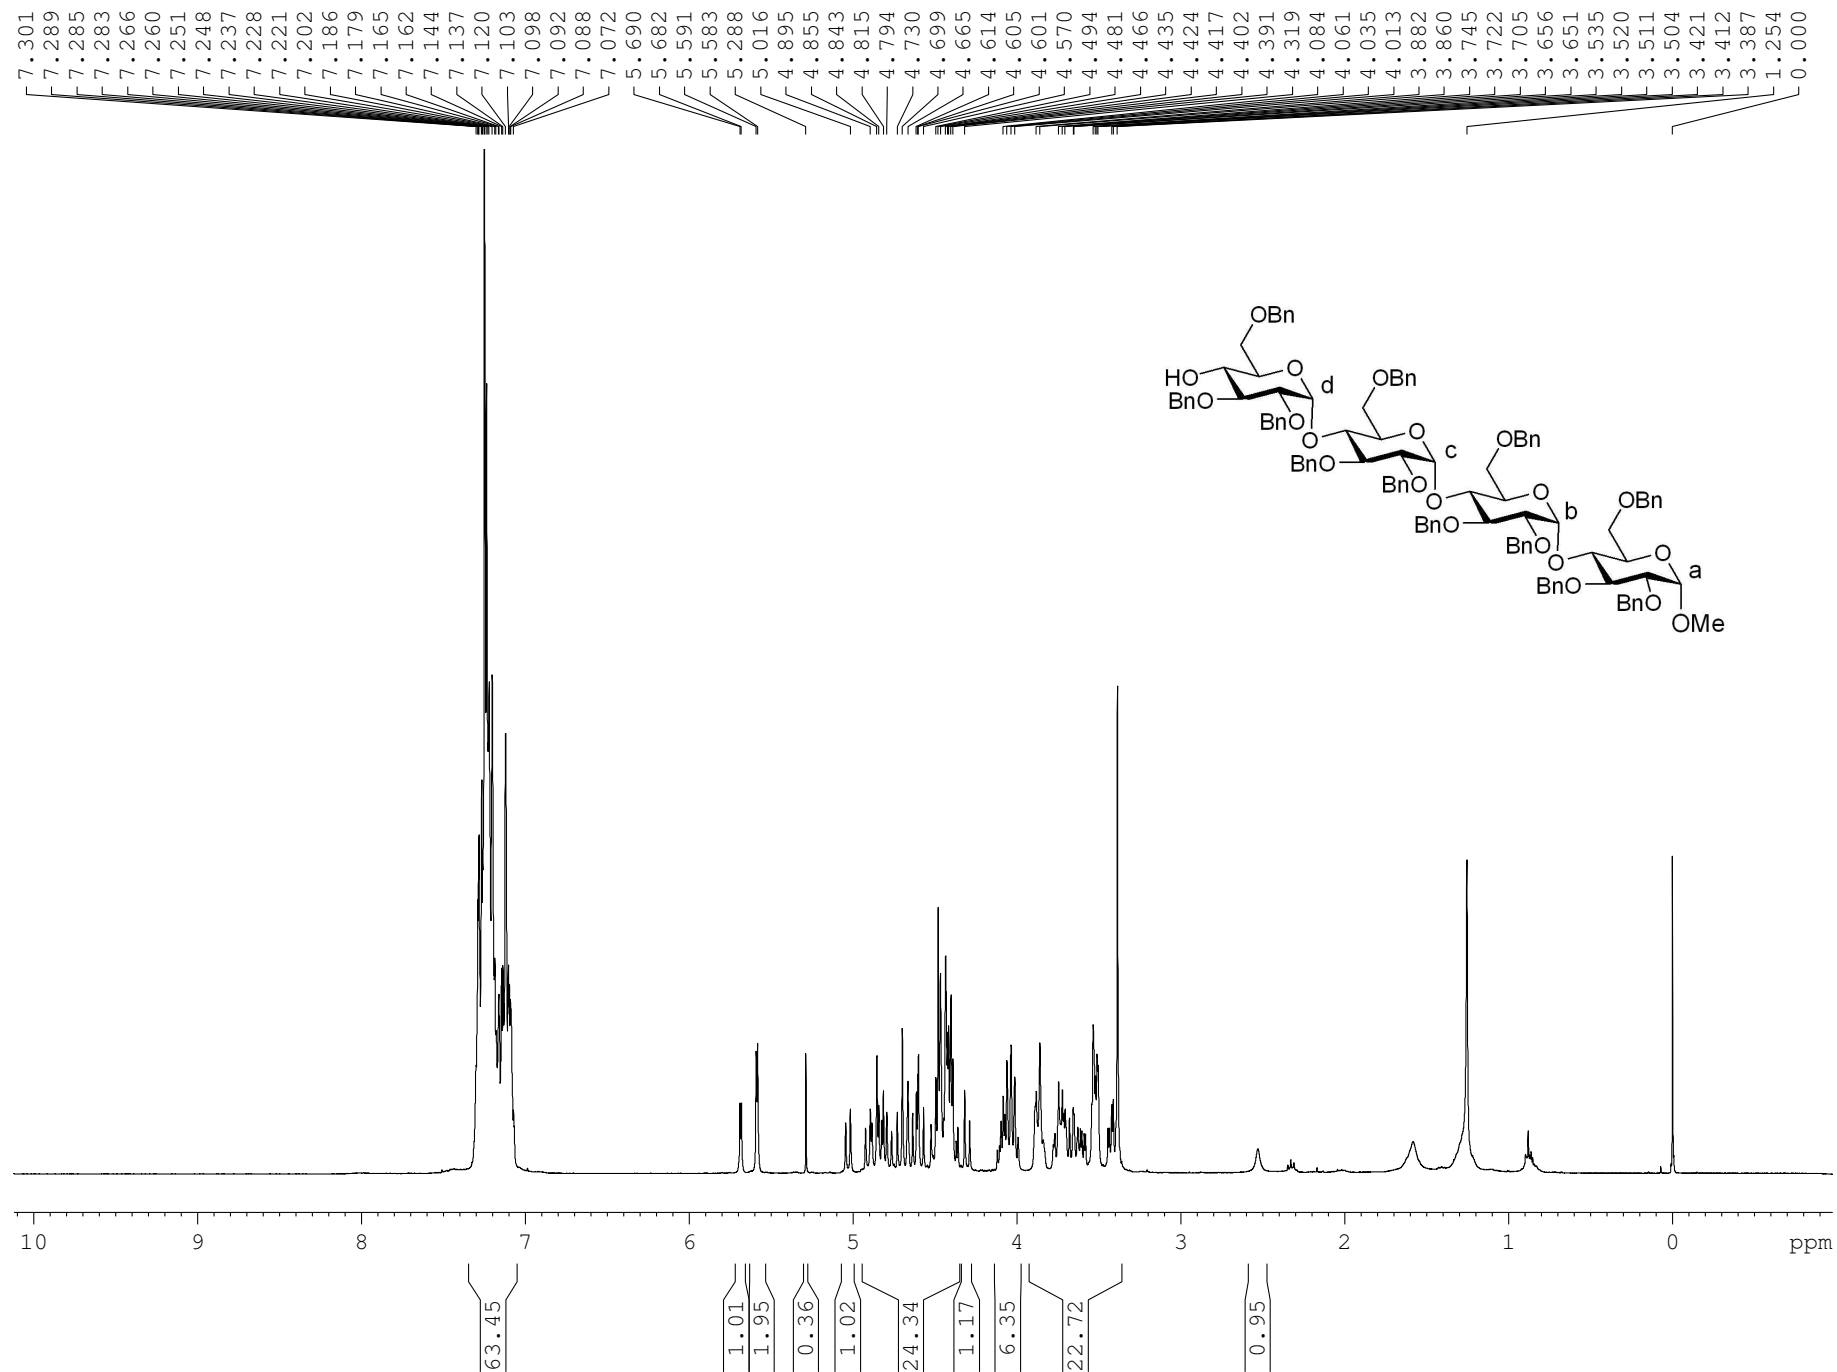

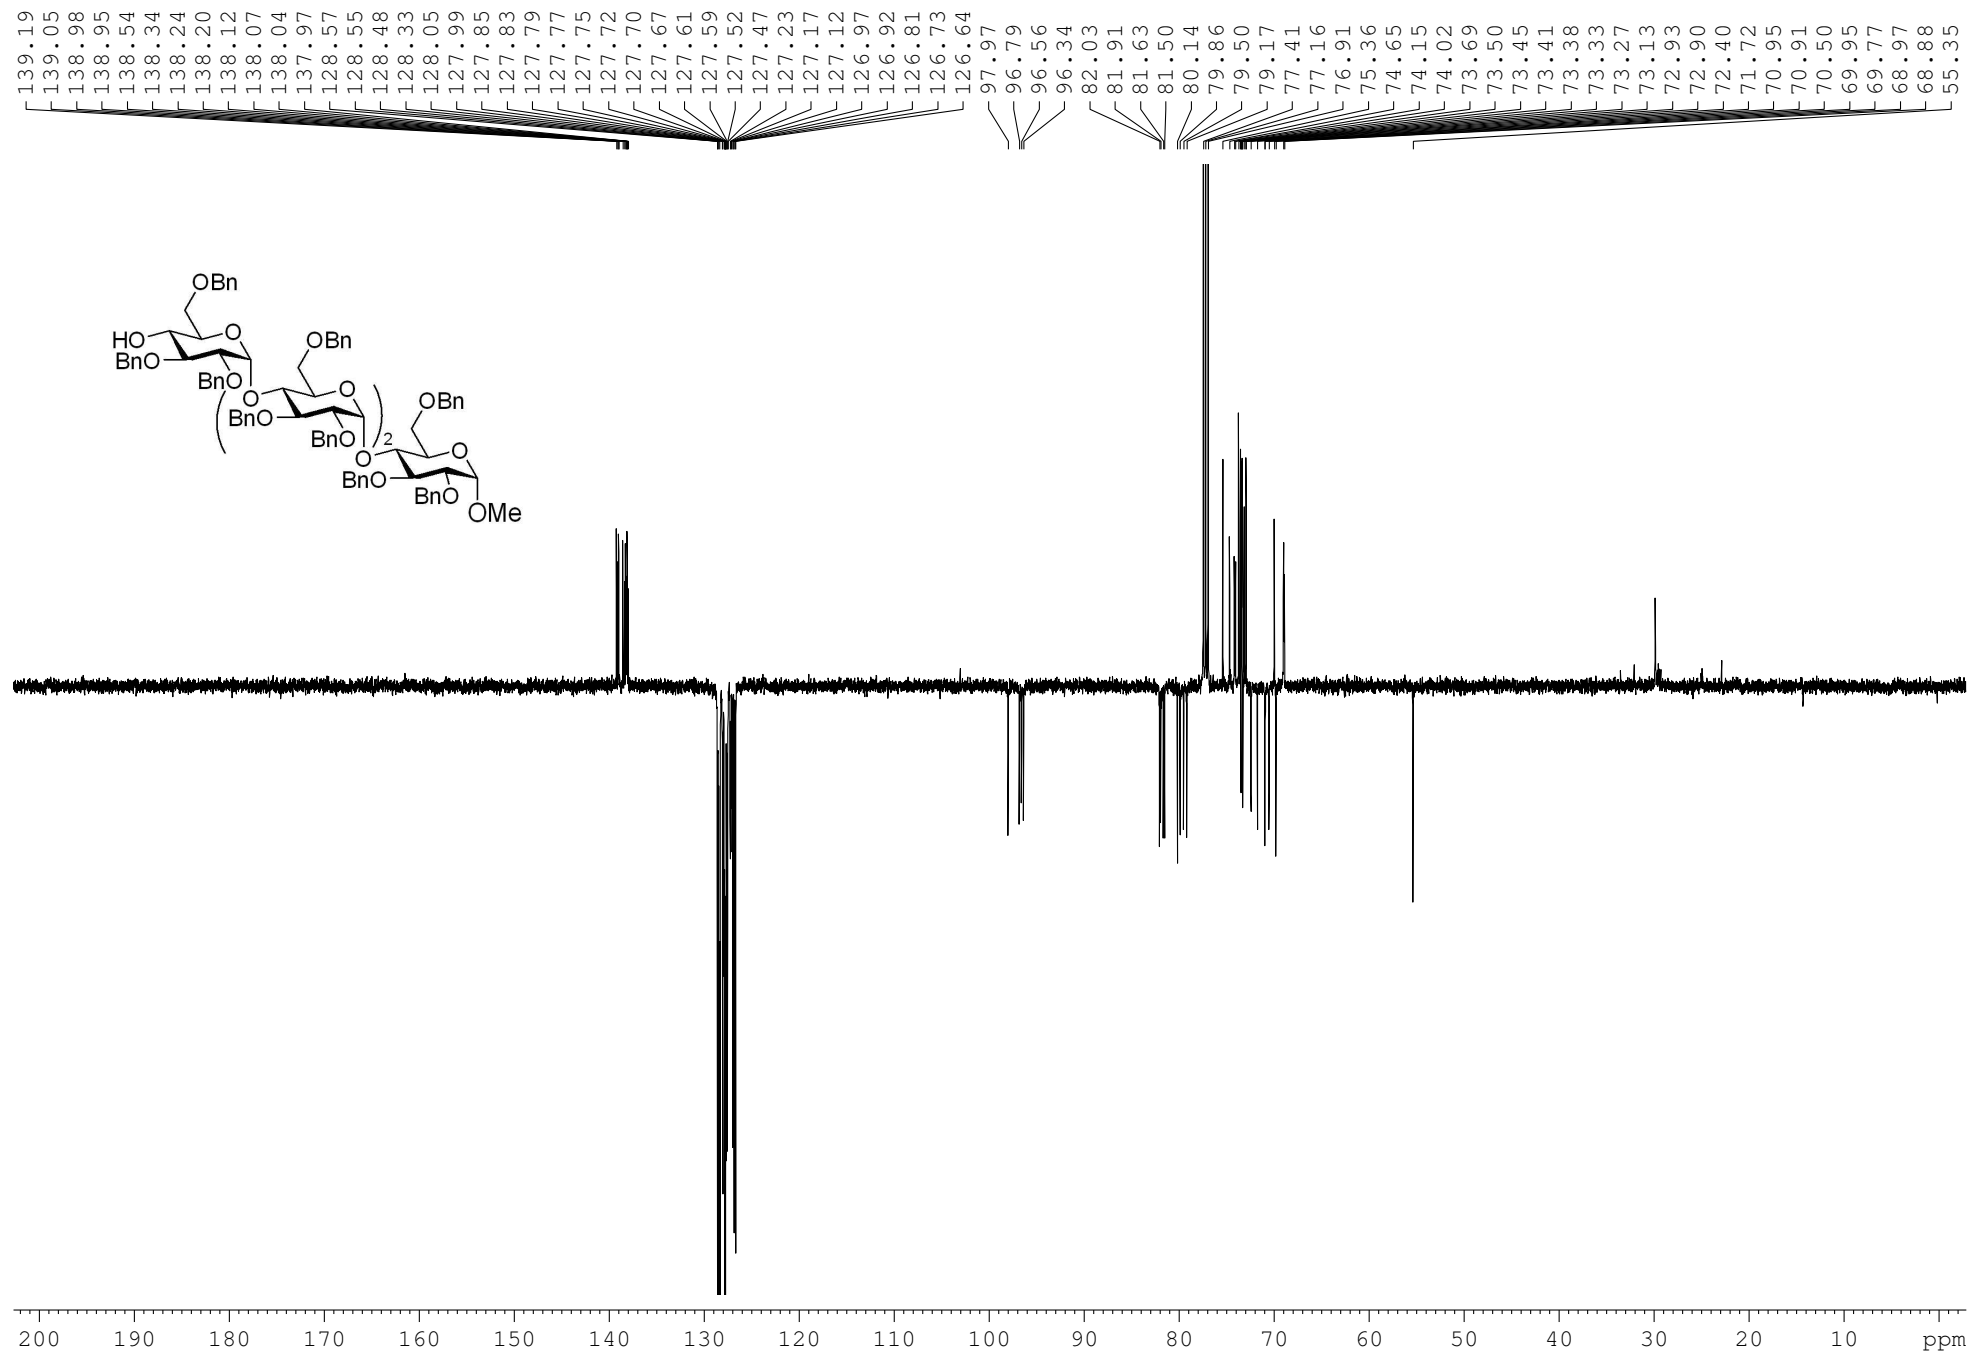

$^1\text{H-NMR}$ ,  $^{13}\text{C-APT}$ ,  $^1\text{H-}^1\text{H COSY}$ , HSQC, HMBC, GATED of **18**

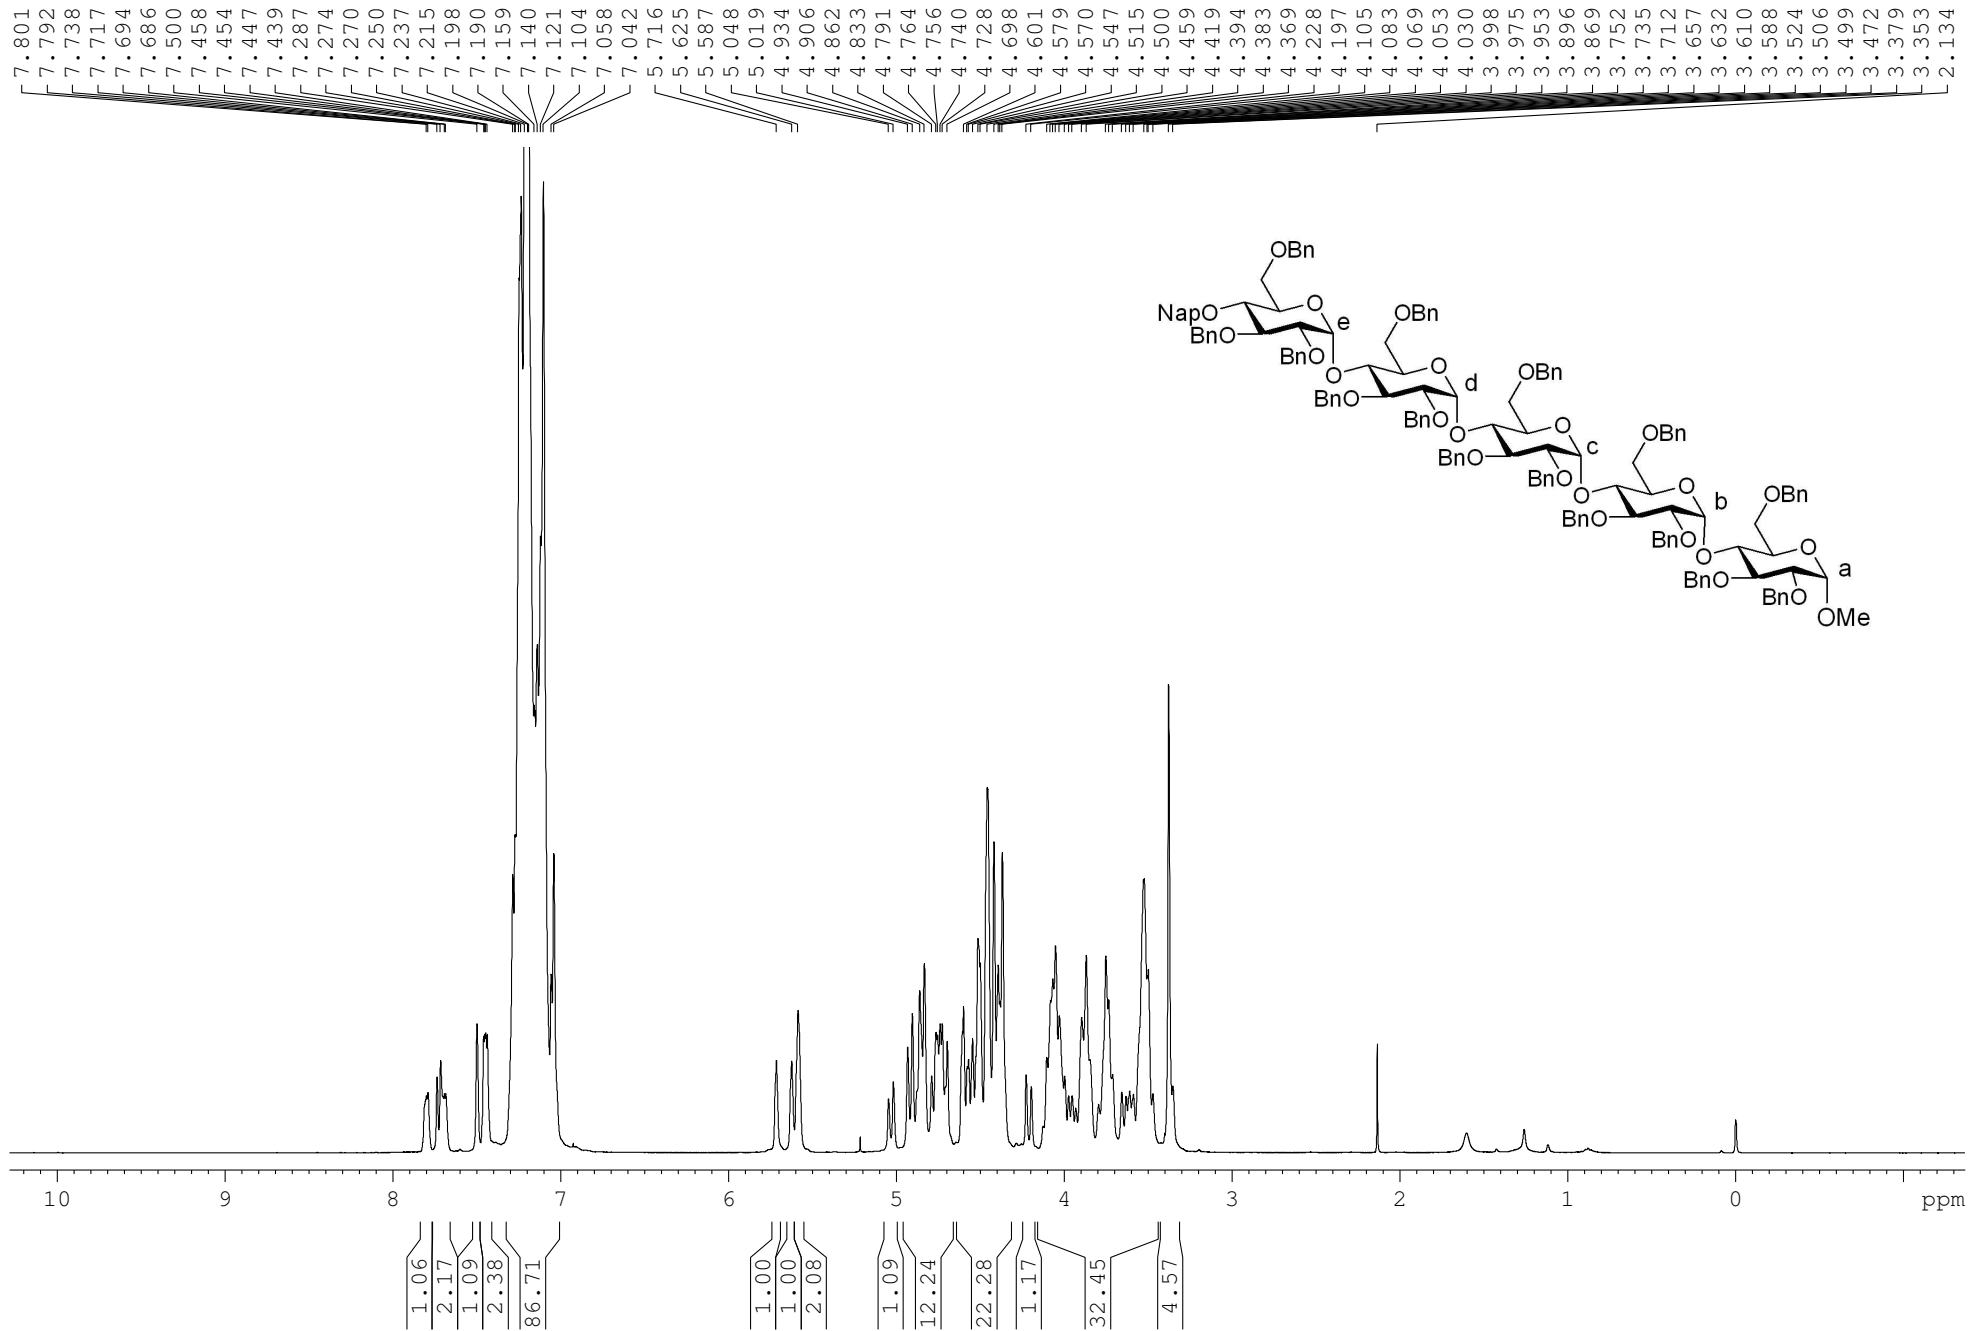

7.801  
7.792  
7.738  
7.717  
7.694  
7.686  
7.500  
7.458  
7.454  
7.447  
7.439  
7.287  
7.274  
7.270  
7.250  
7.237  
7.215  
7.198  
7.190  
7.159  
7.140  
7.121  
7.104  
7.058  
7.042  
5.716  
5.625  
5.587  
5.048  
5.019  
4.934  
4.906  
4.862  
4.833  
4.791  
4.764  
4.756  
4.740  
4.728  
4.698  
4.601  
4.579  
4.570  
4.547  
4.515  
4.500  
4.459  
4.419  
4.394  
4.383  
4.369  
4.228  
4.197  
4.105  
4.083  
4.069  
4.053  
4.030  
3.998  
3.975  
3.953  
3.896  
3.869  
3.752  
3.735  
3.712  
3.657  
3.632  
3.610  
3.588  
3.524  
3.506  
3.499  
3.472  
3.379  
3.353  
2.134

139.14  
 139.00  
 138.95  
 138.89  
 138.44  
 138.28  
 138.27  
 138.14  
 138.08  
 137.99  
 137.94  
 137.90  
 136.06  
 133.30  
 133.00  
 128.52  
 128.02  
 128.00  
 127.81  
 127.59  
 127.53  
 127.50  
 127.18  
 127.13  
 127.05  
 126.91  
 126.77  
 126.66  
 126.59  
 126.57  
 126.15  
 126.10  
 125.93  
 97.91  
 97.01  
 96.52  
 96.46  
 96.34  
 82.24  
 81.98  
 81.89  
 81.68  
 80.05  
 79.75  
 79.57  
 79.49  
 77.69  
 77.48  
 77.36  
 77.16  
 76.84  
 75.54  
 75.12  
 74.60  
 74.12  
 74.06  
 73.55  
 73.45  
 73.41  
 73.33  
 73.29  
 73.17  
 73.06  
 72.95  
 72.91  
 72.85  
 72.50  
 71.02  
 70.90  
 70.85  
 69.69  
 68.92  
 68.86  
 68.73  
 68.16  
 55.29  
 68.80

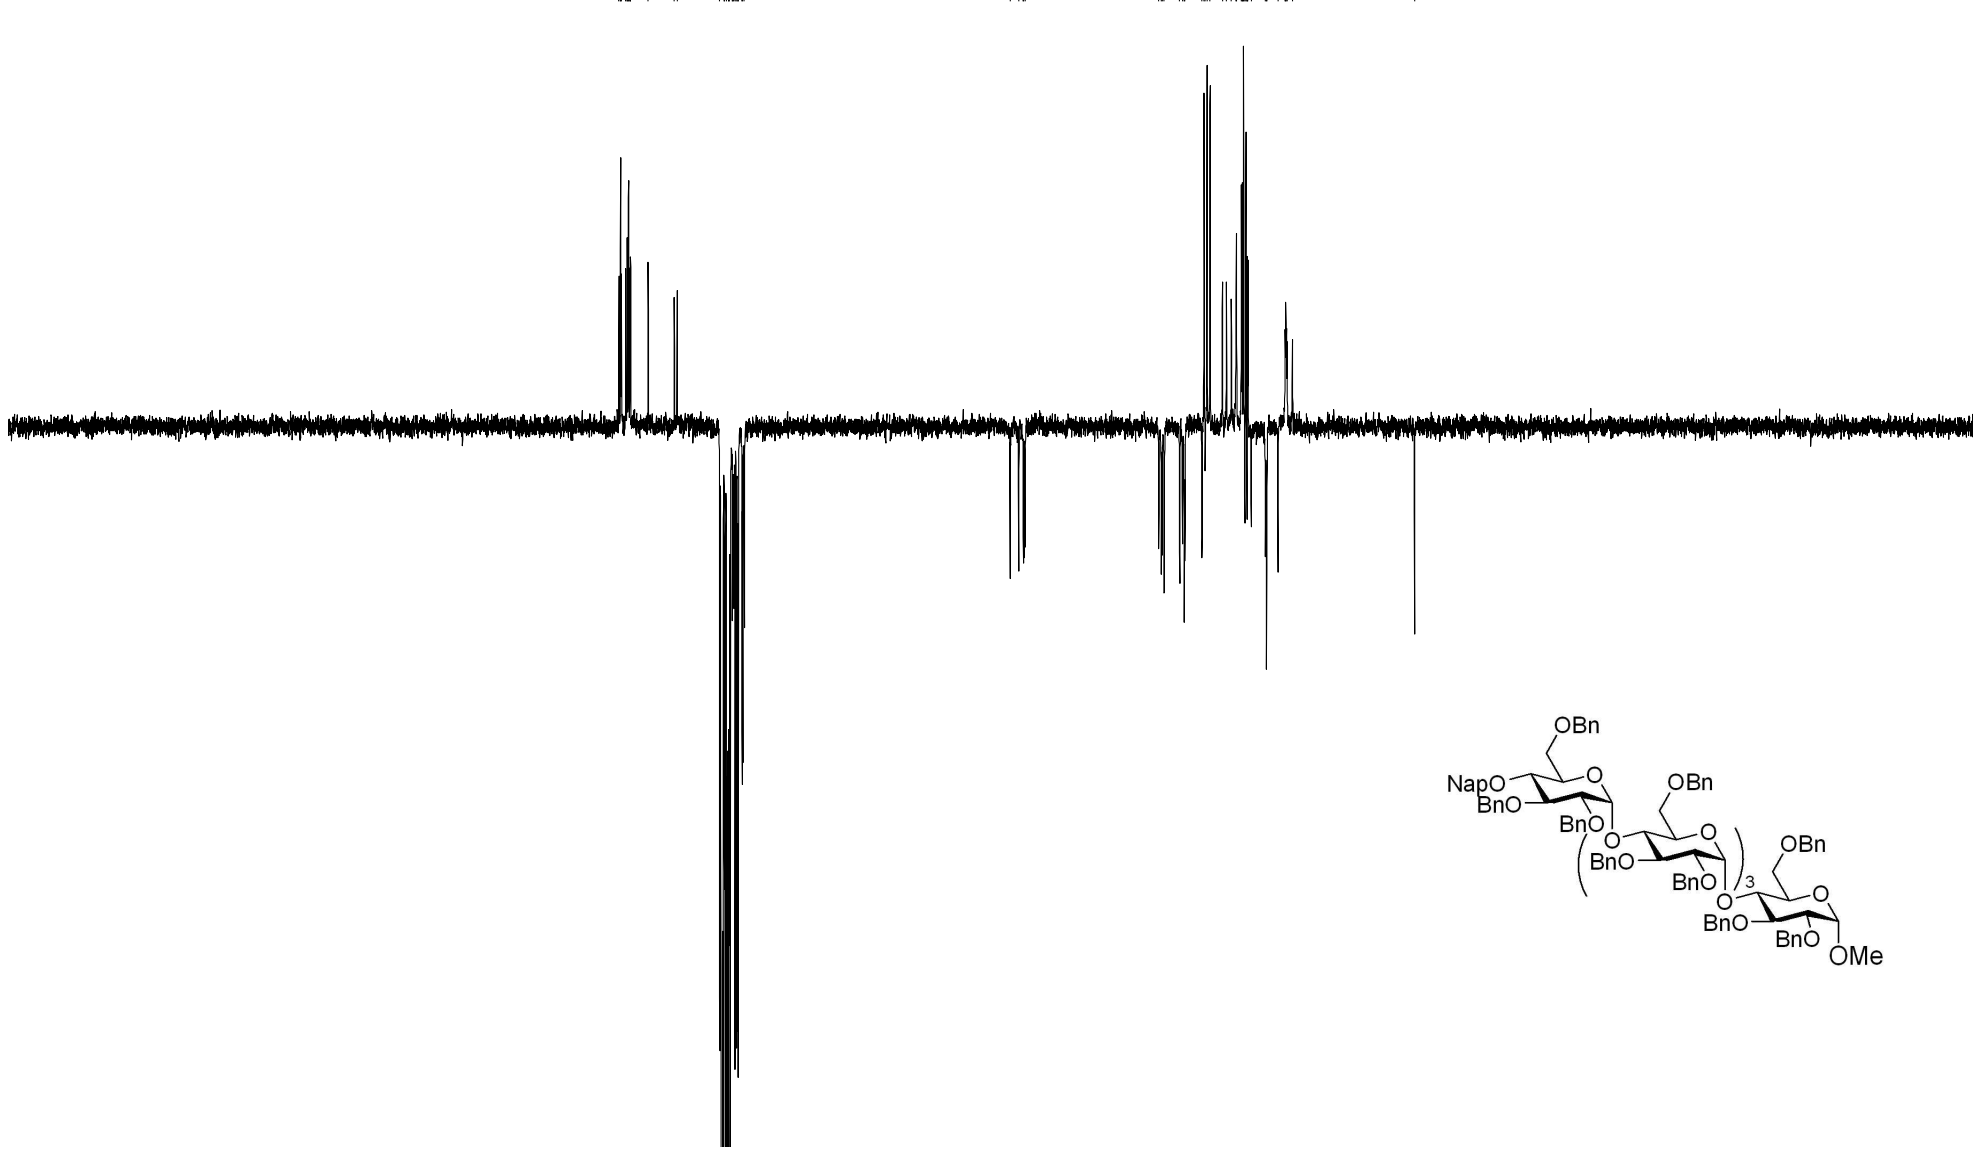

200 190 180 170 160 150 140 130 120 110 100 90 80 70 60 50 40 30 20 10 ppm

S81

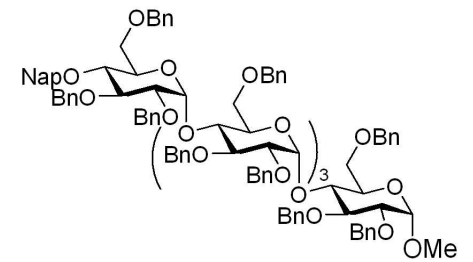

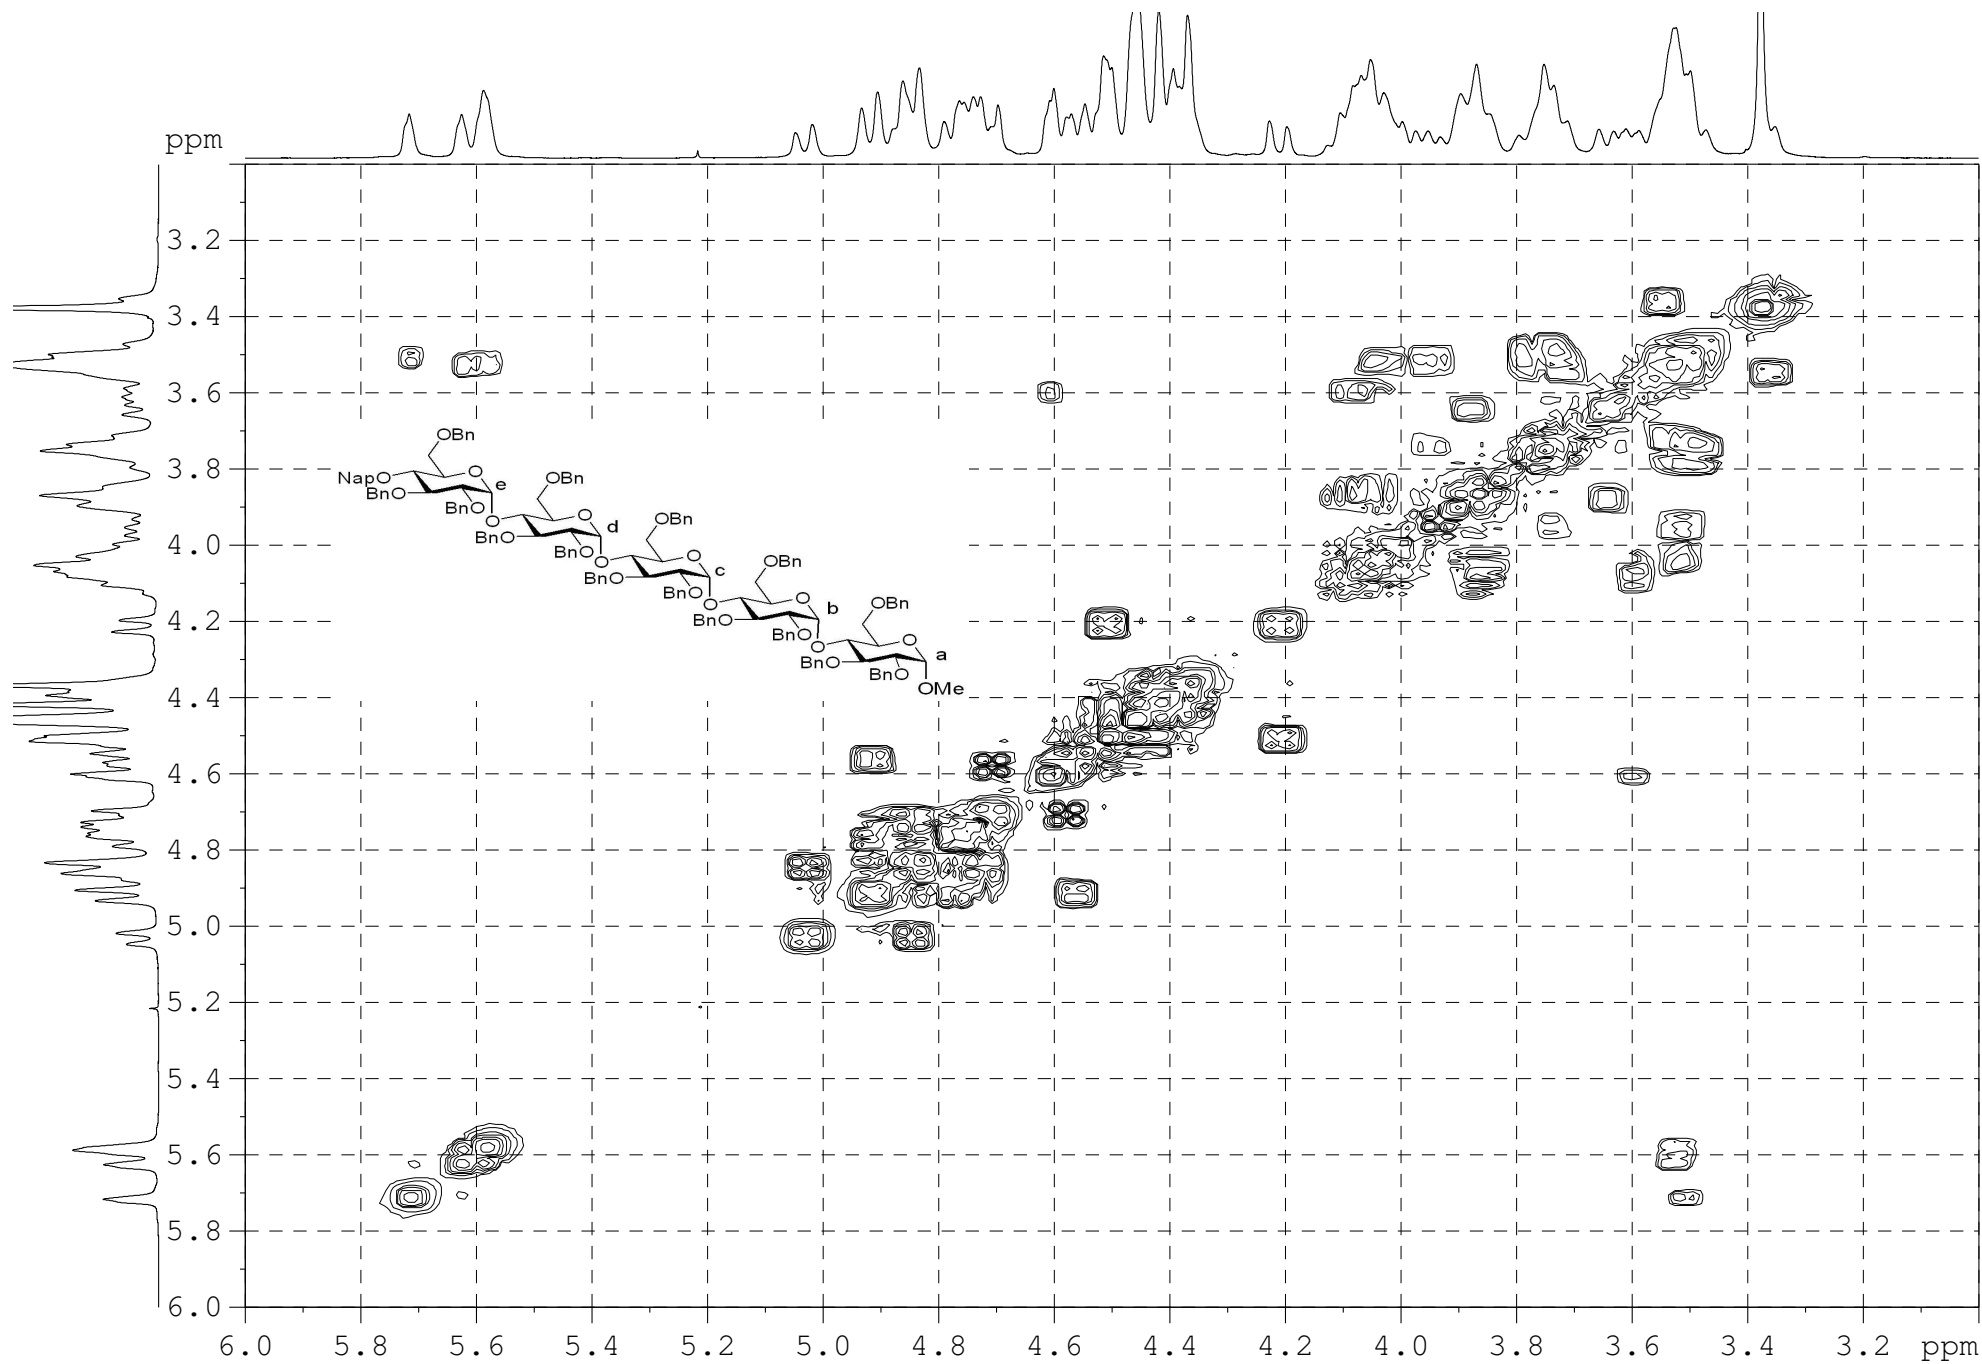

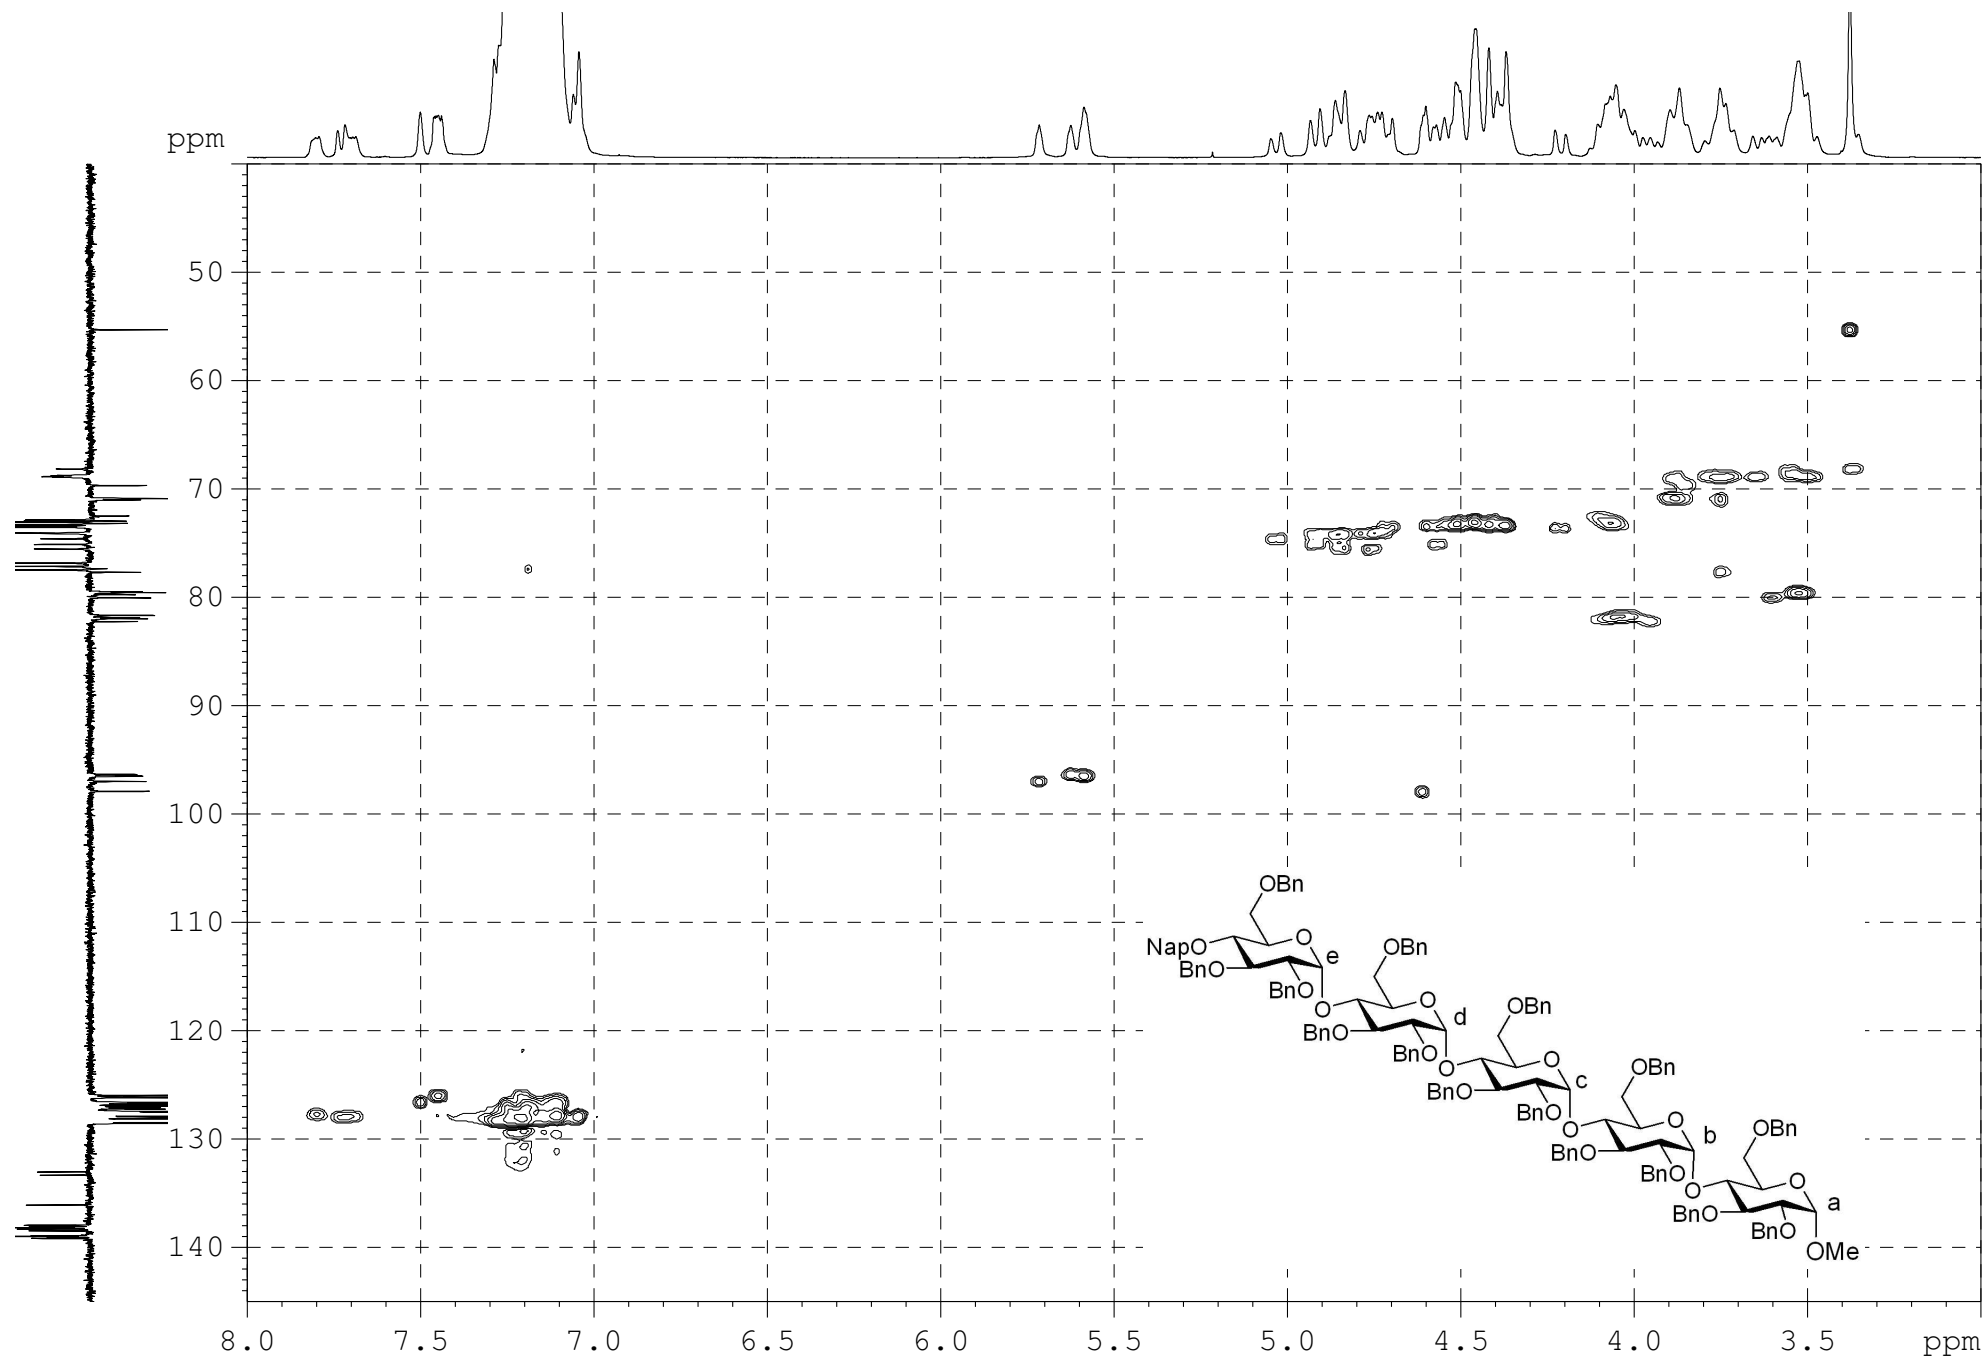

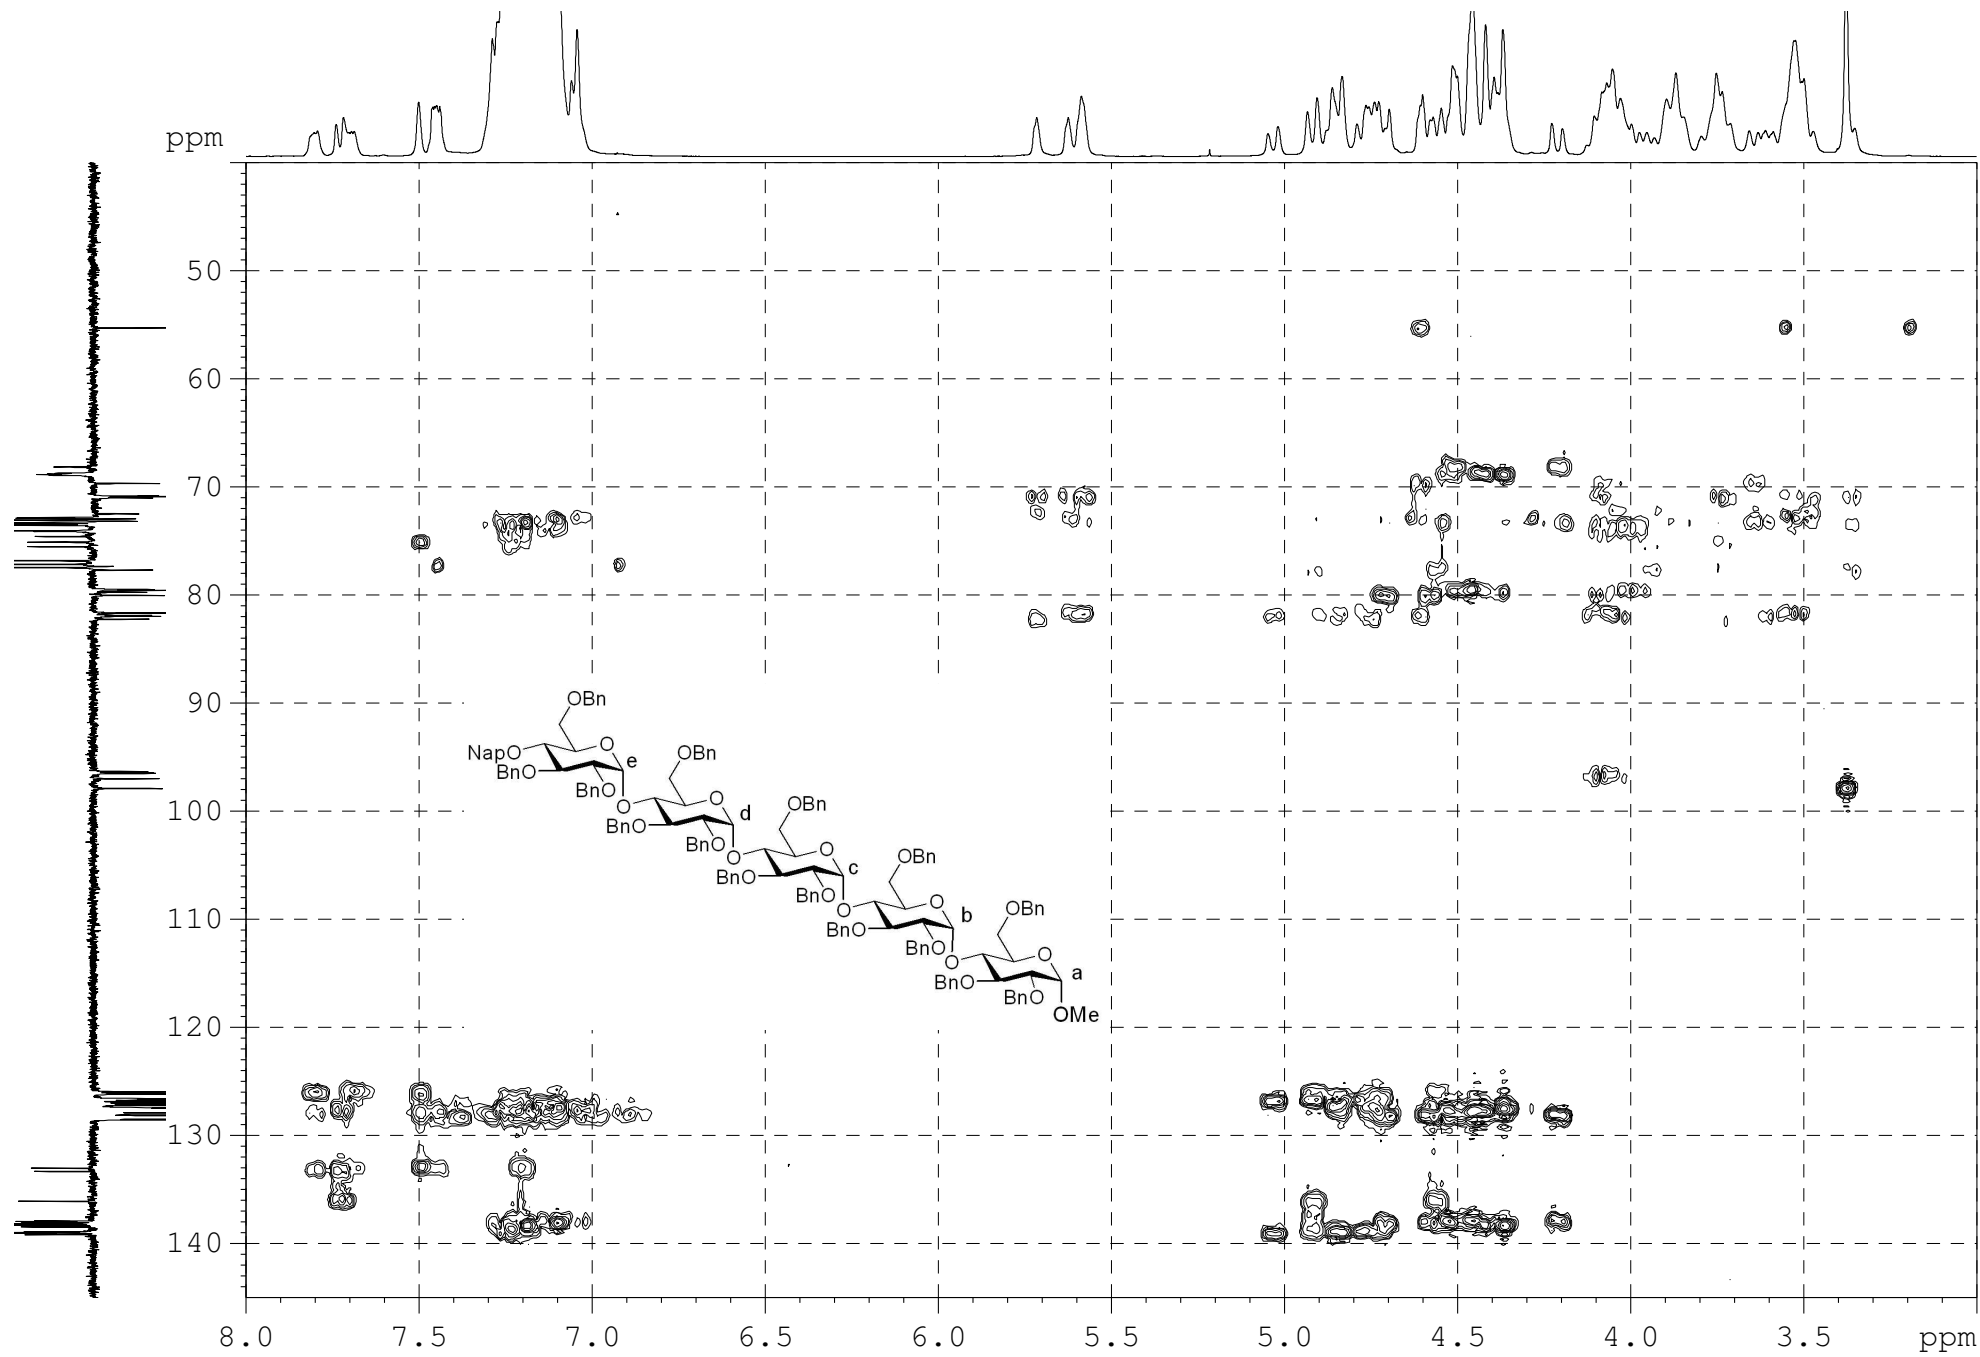



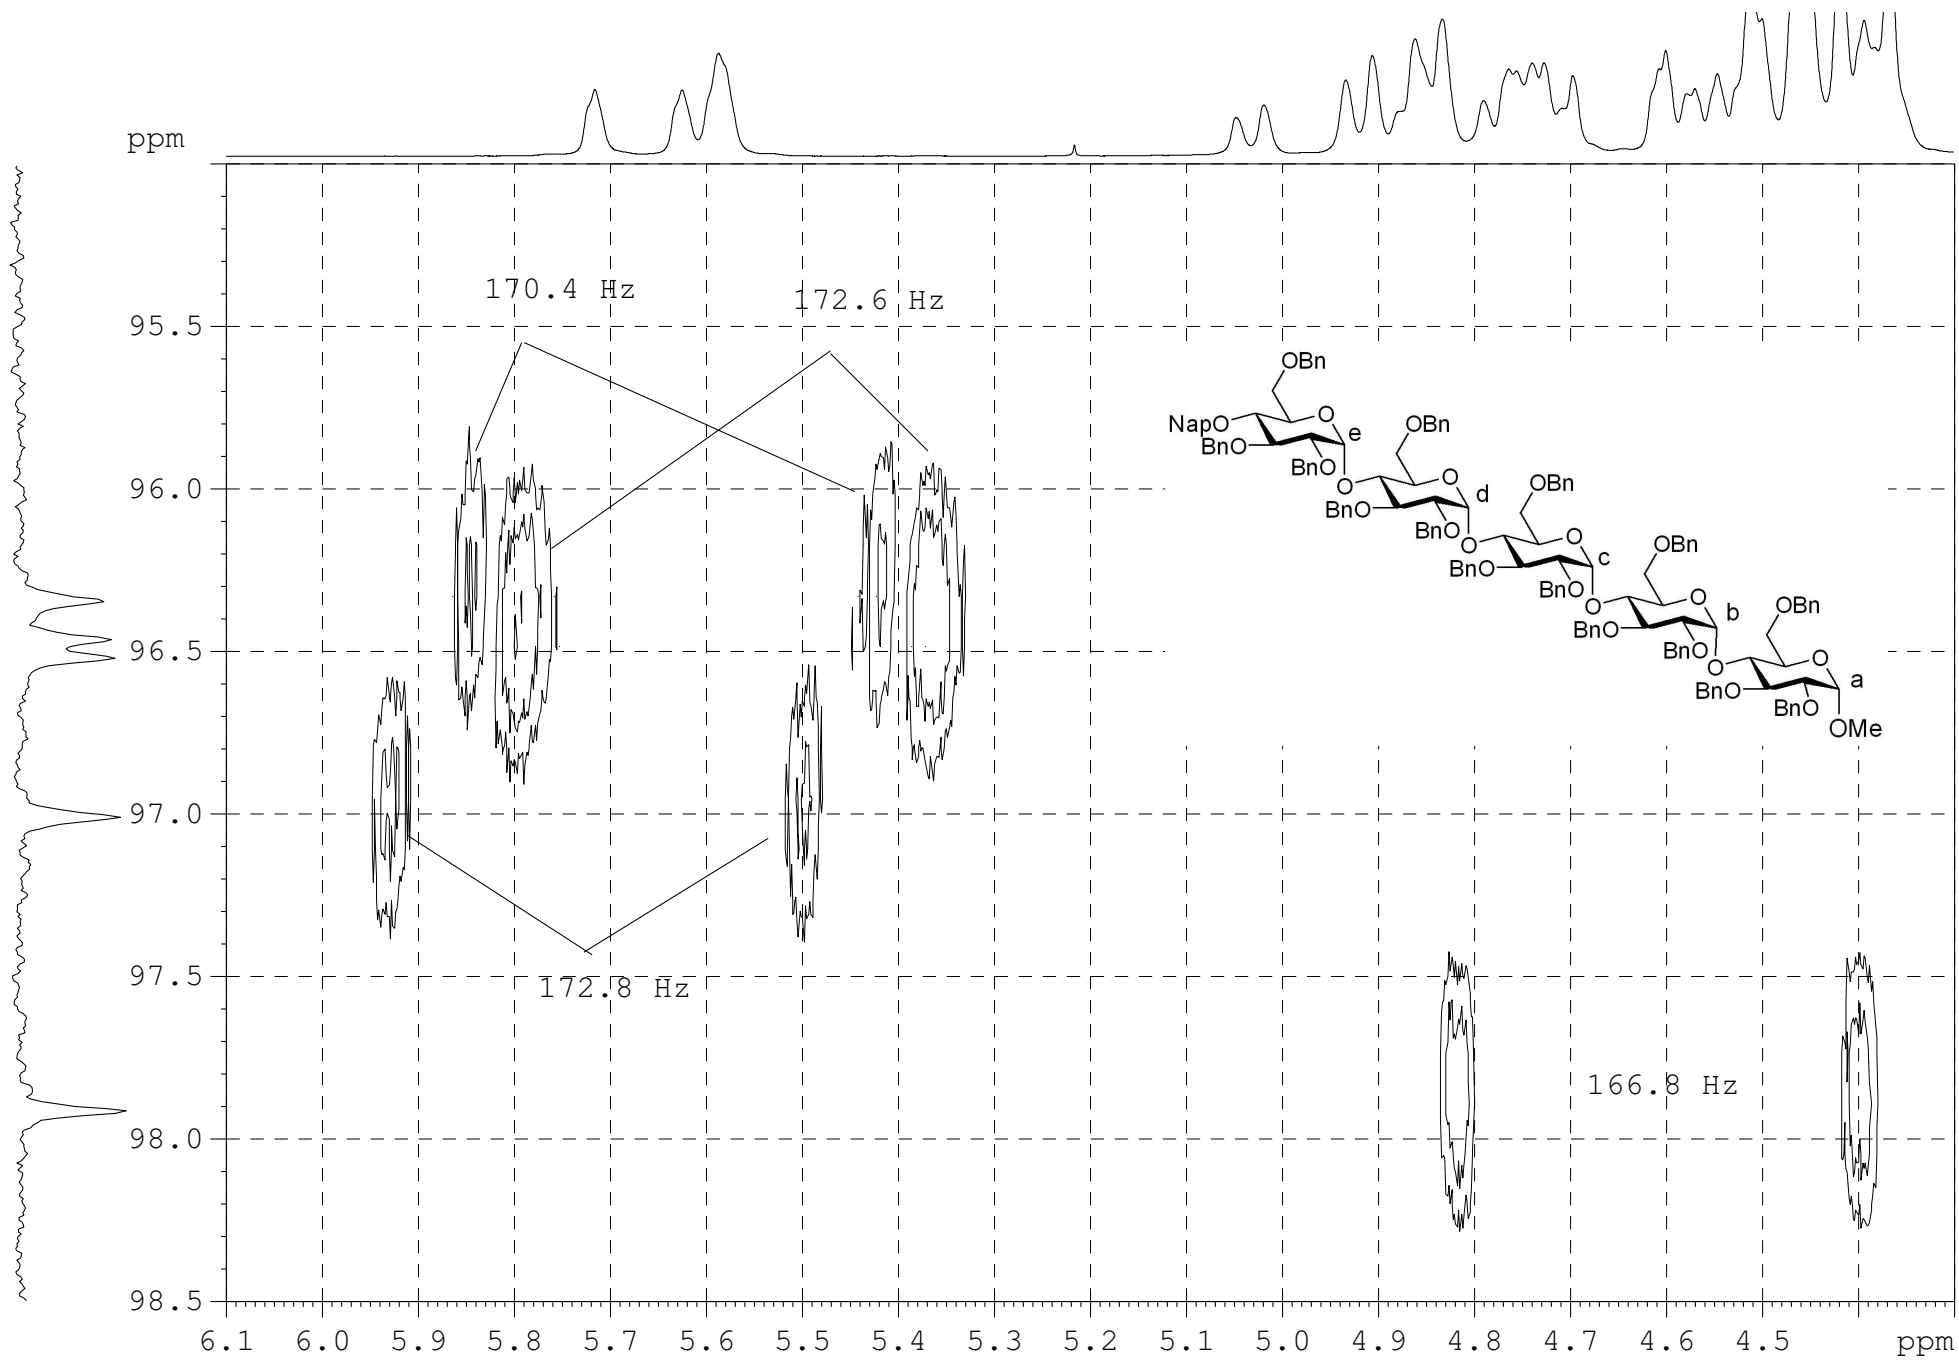

<sup>1</sup>H-NMR, <sup>13</sup>C-APT of 19

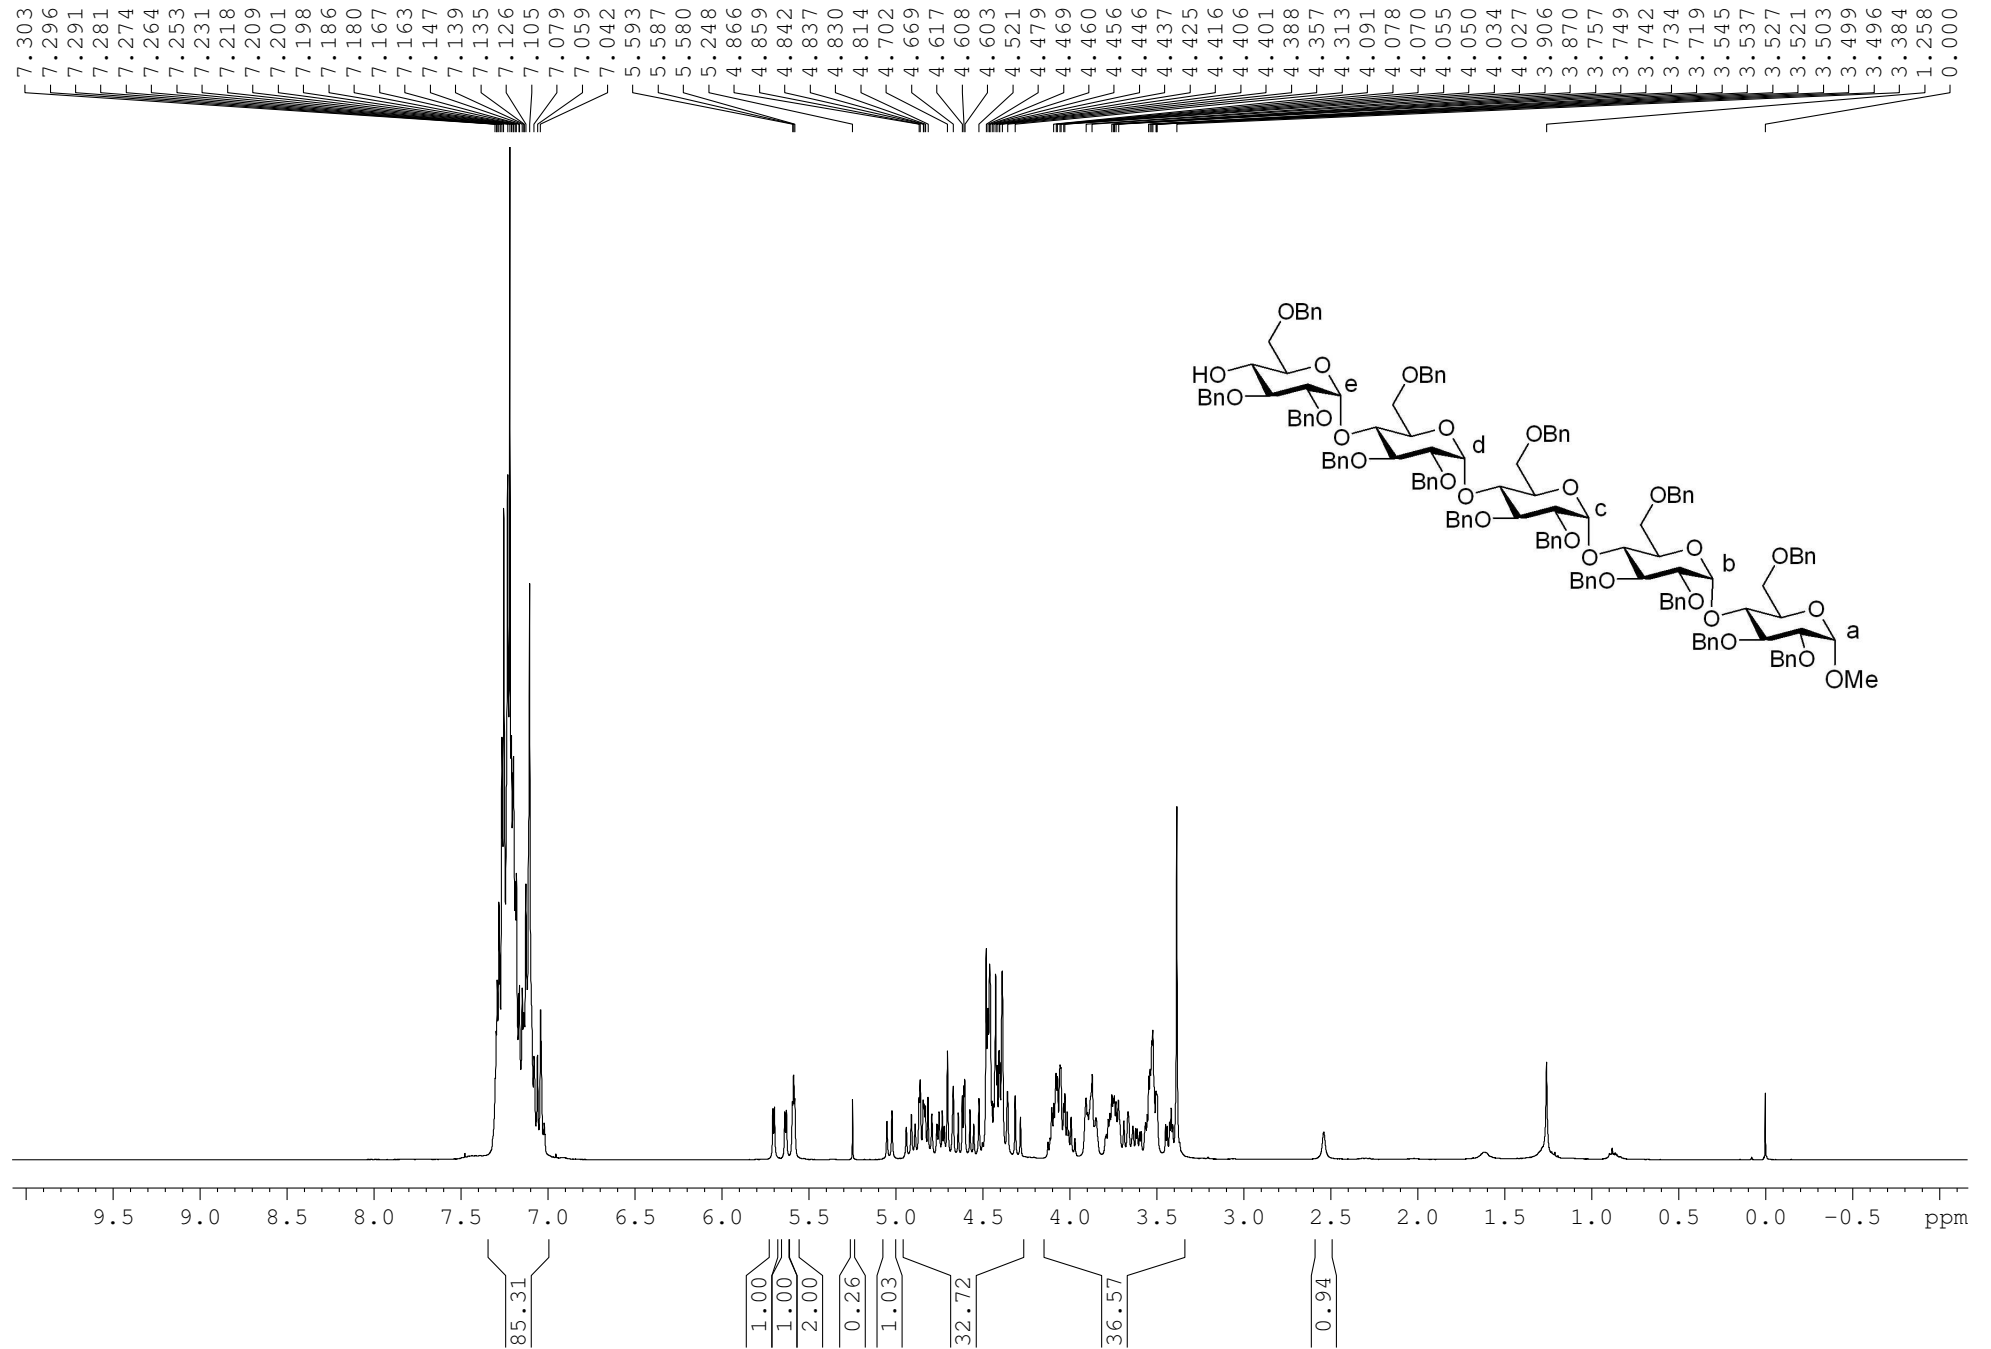



$^1\text{H-NMR}$ ,  $^{13}\text{C-APT}$ ,  $^1\text{H-}^1\text{H COSY}$ , HSQC, HMBC, GATED of **20**

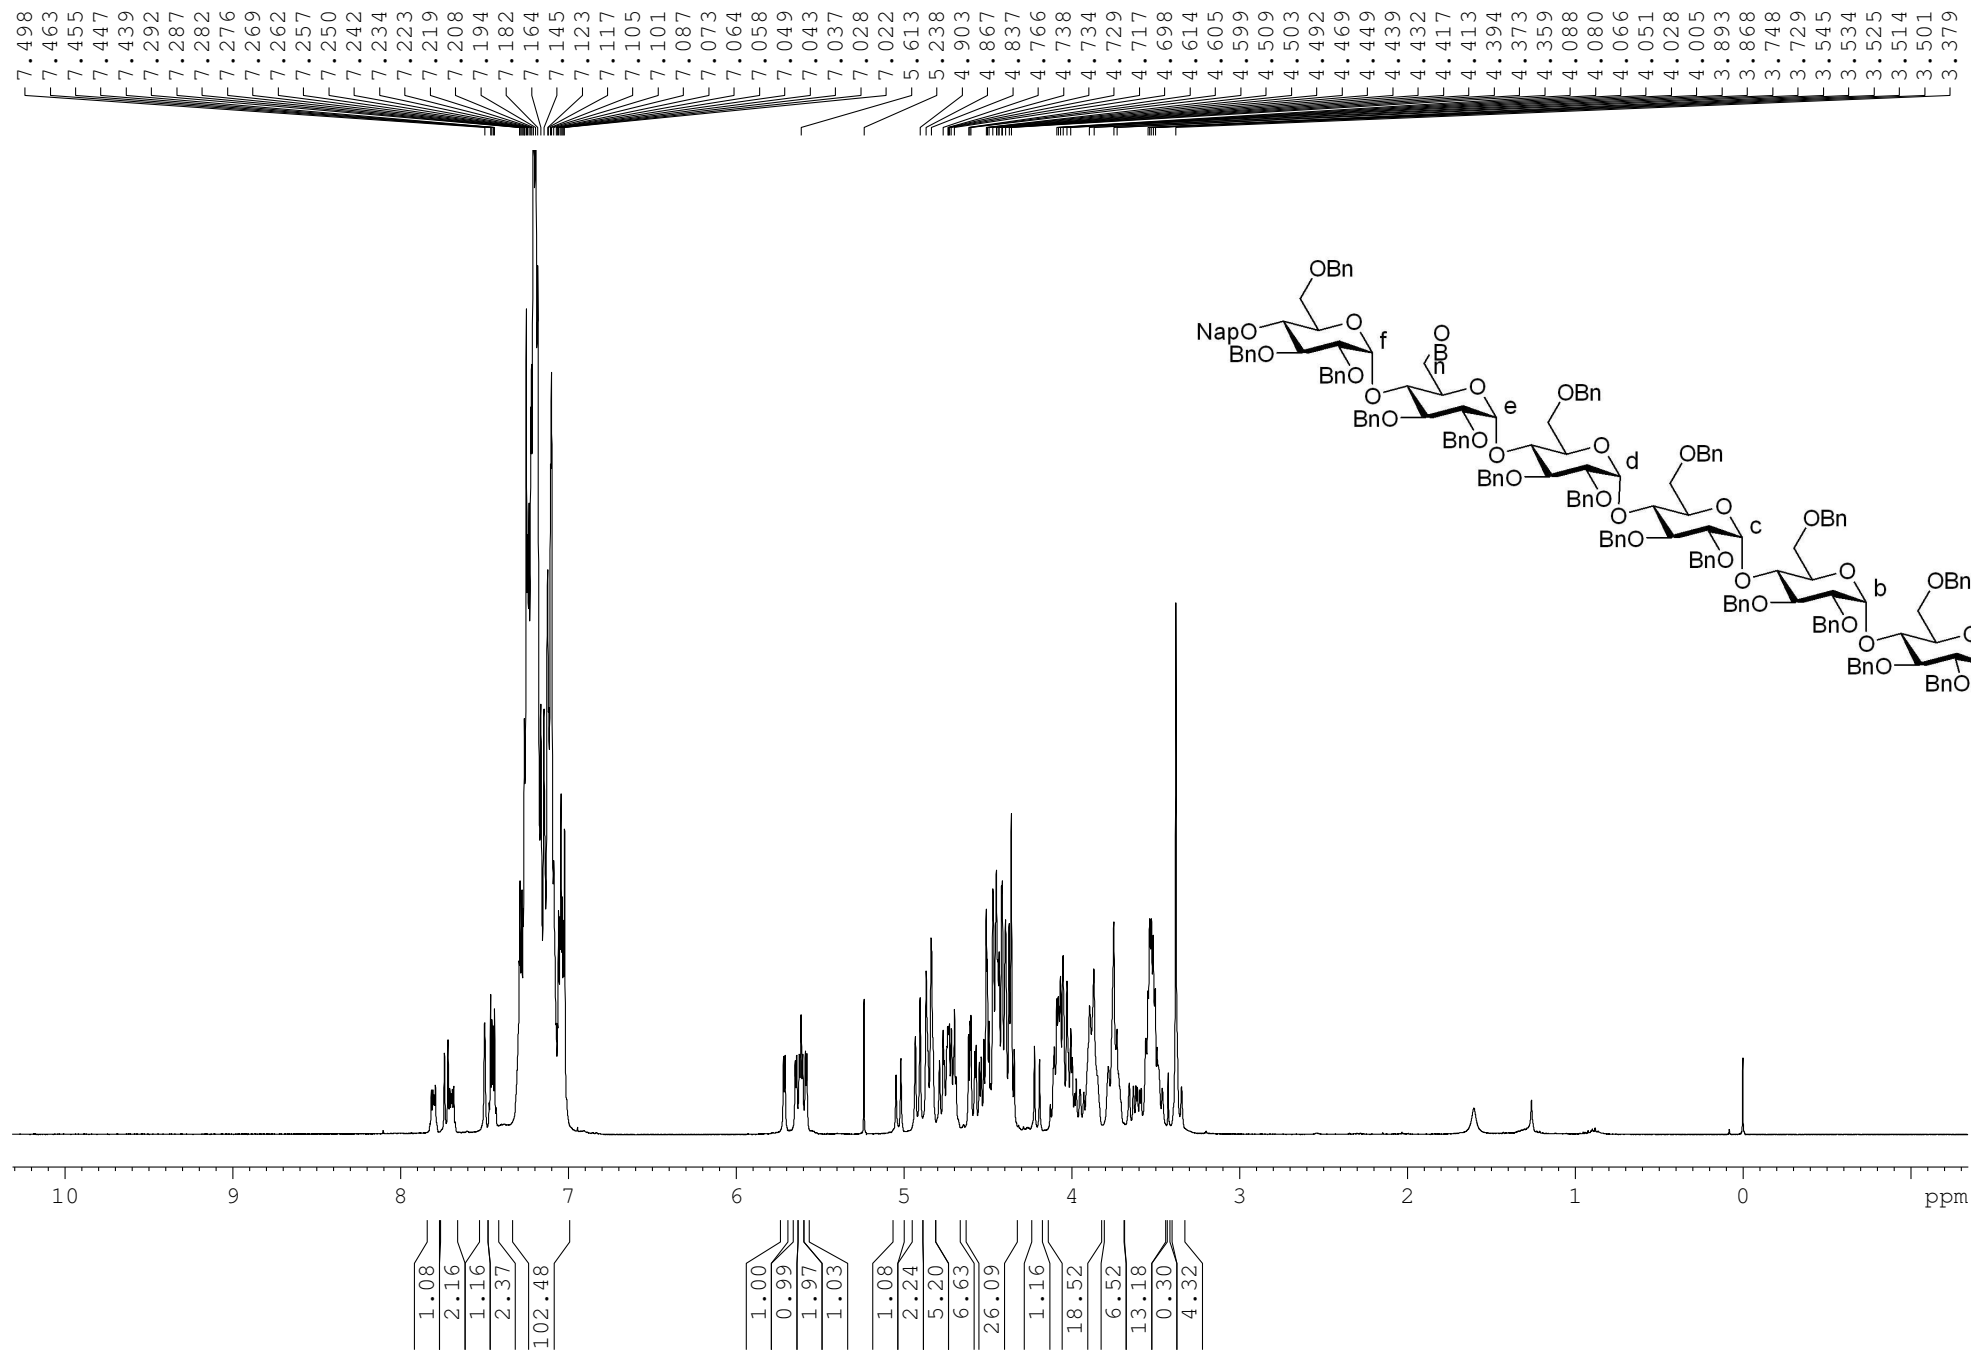

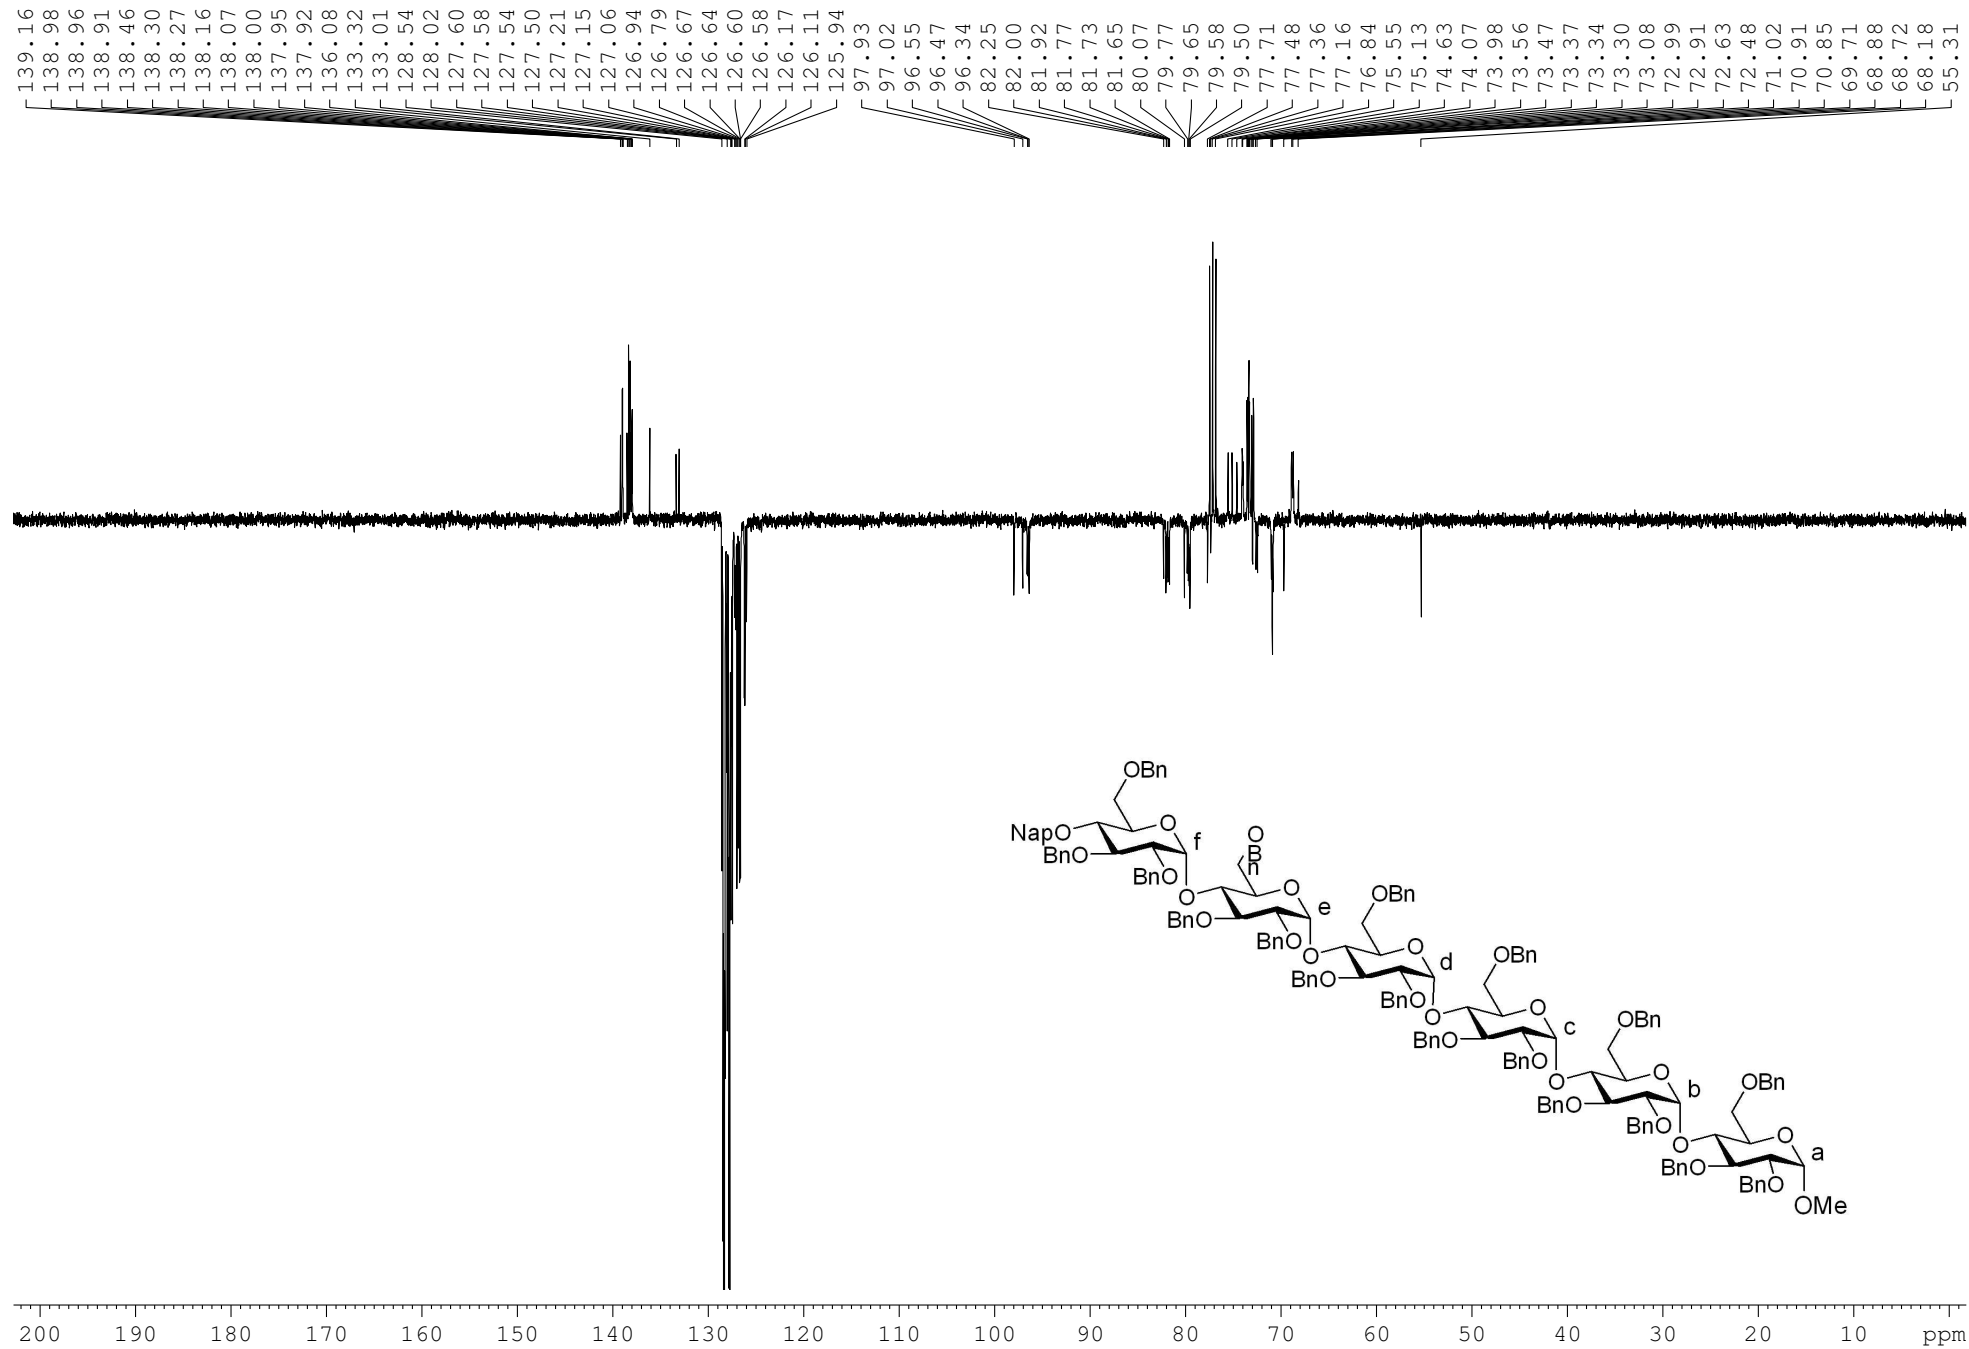

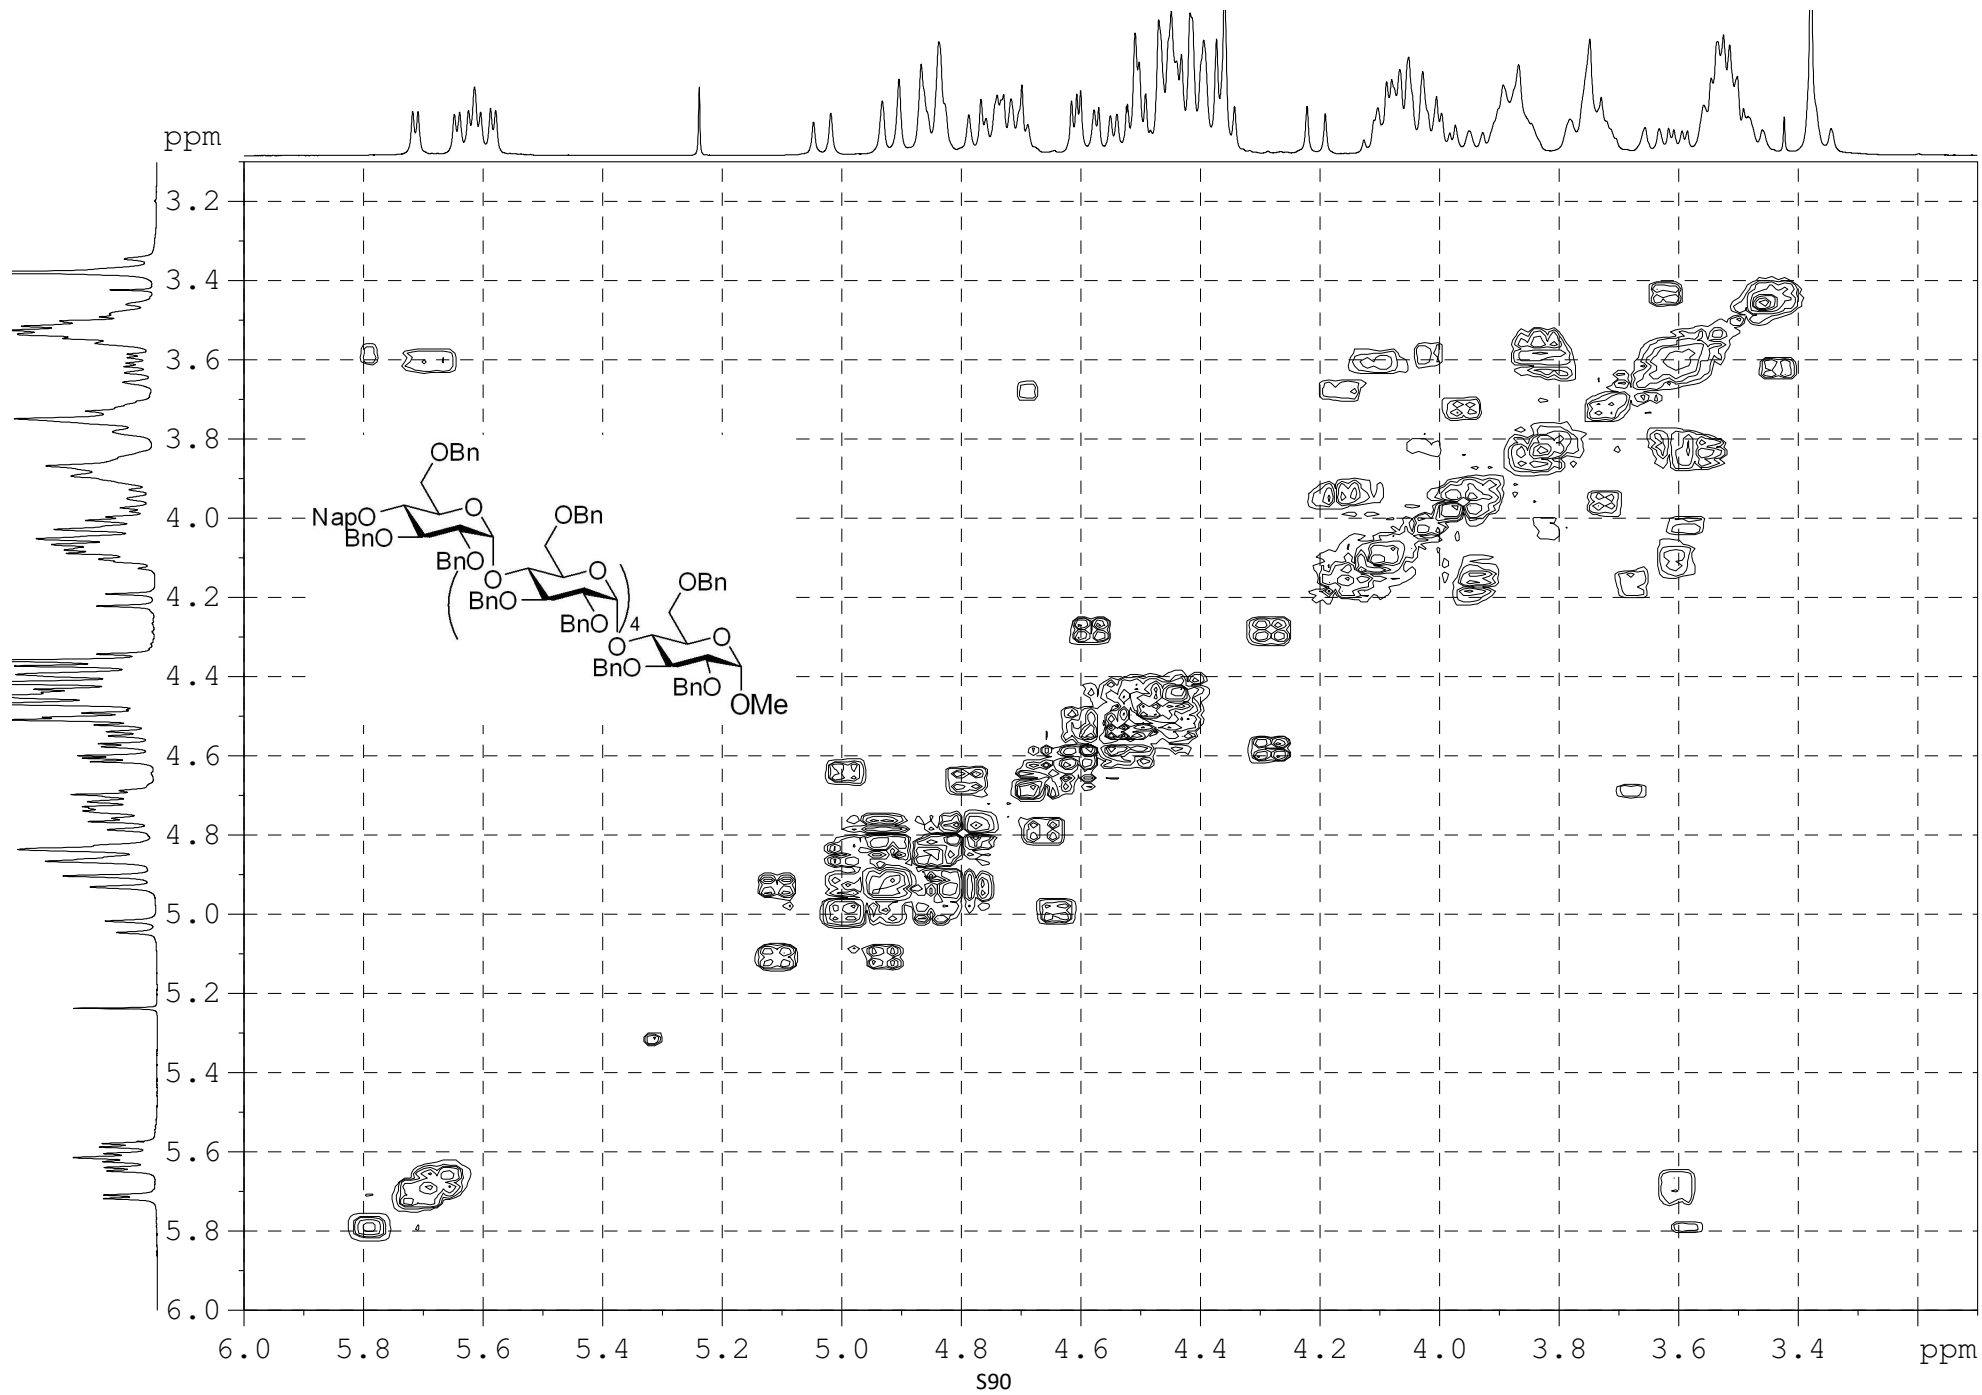

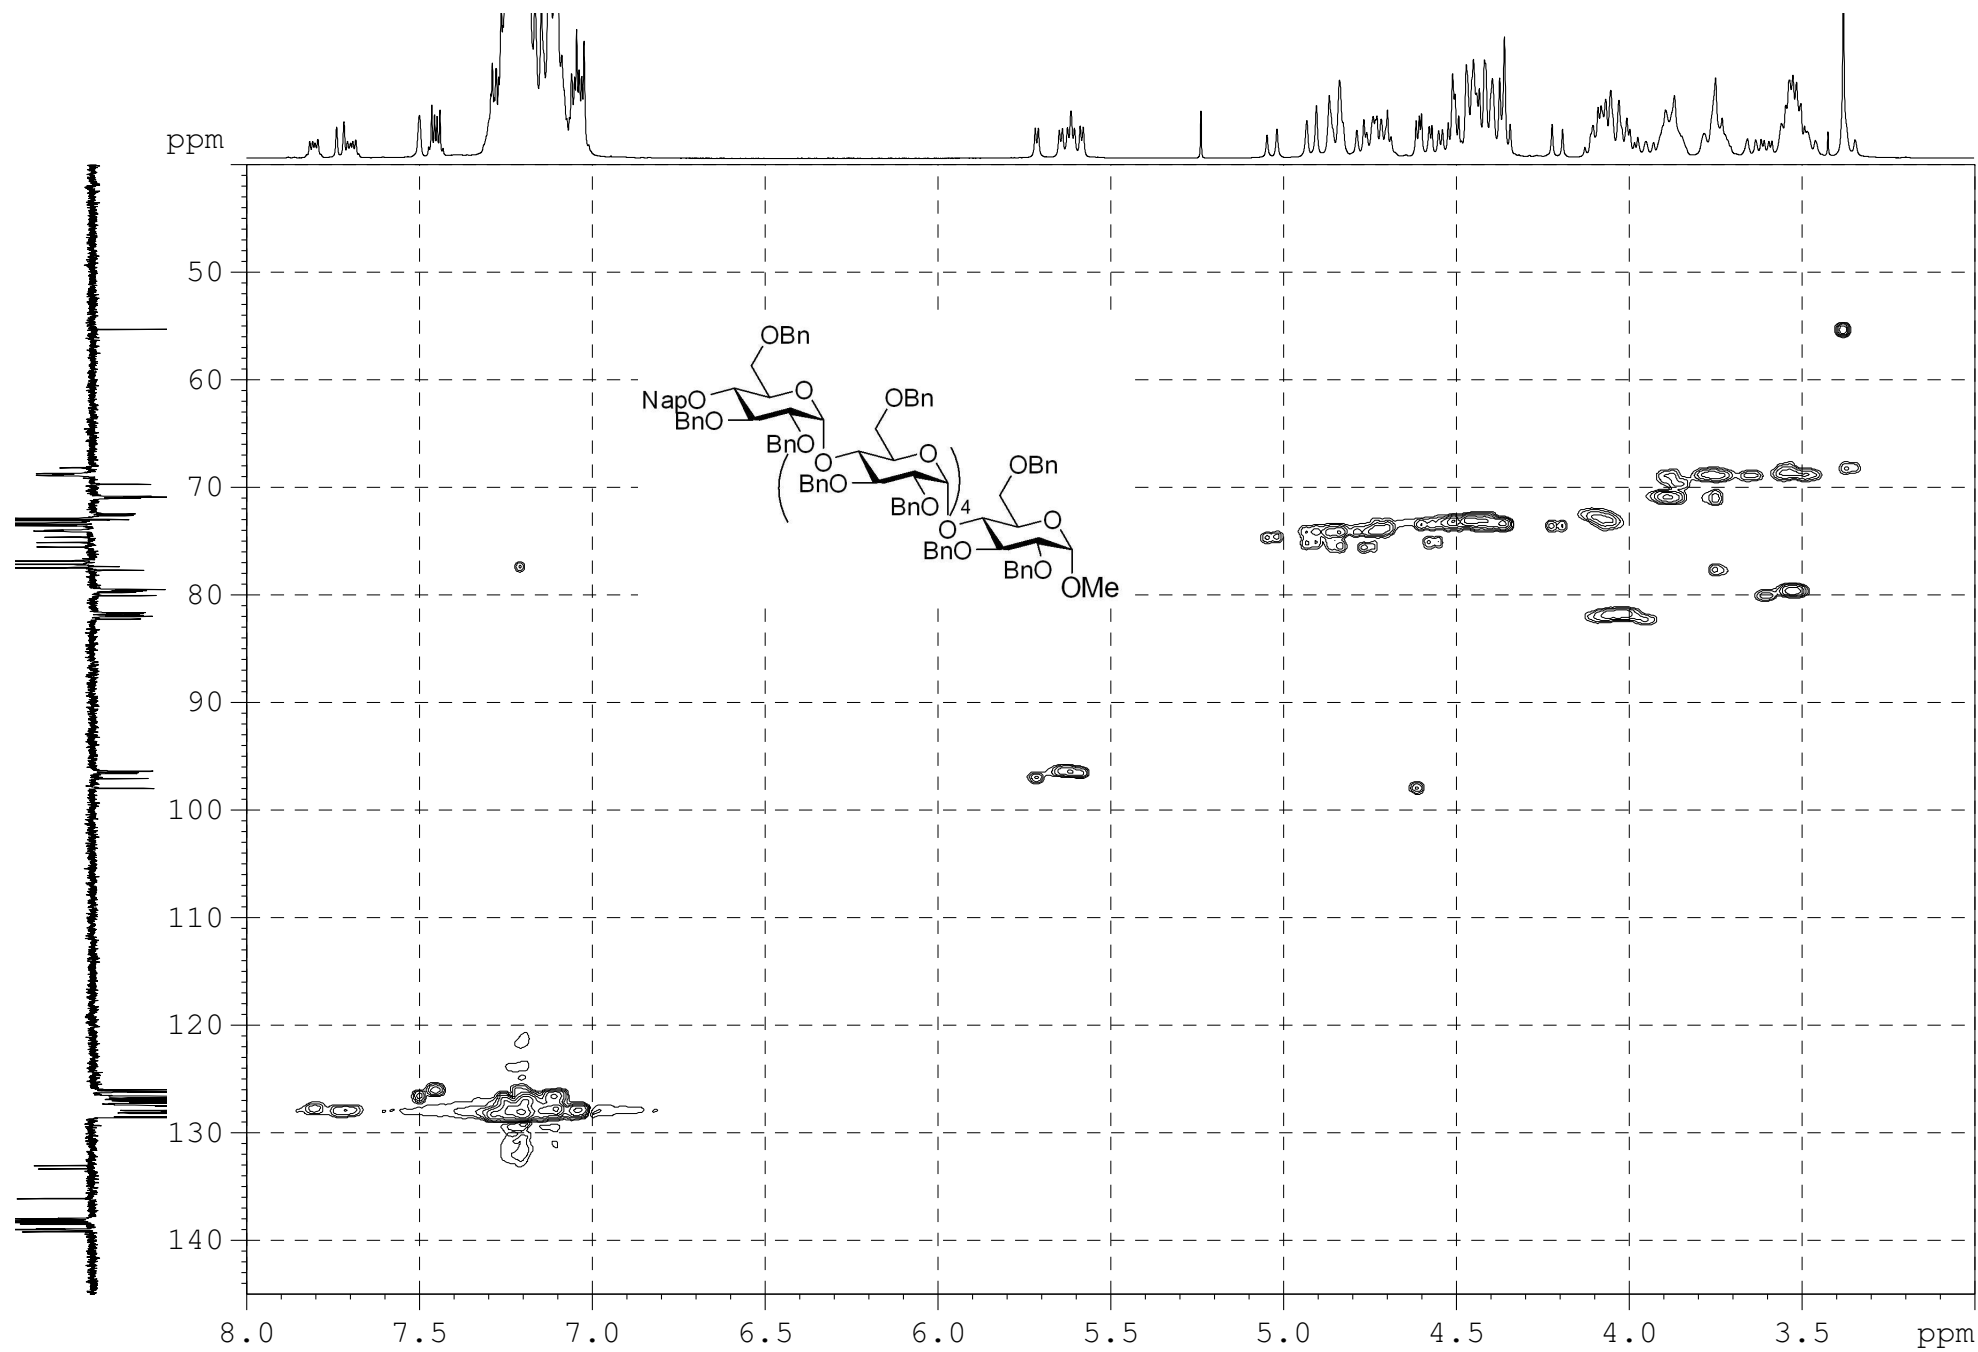

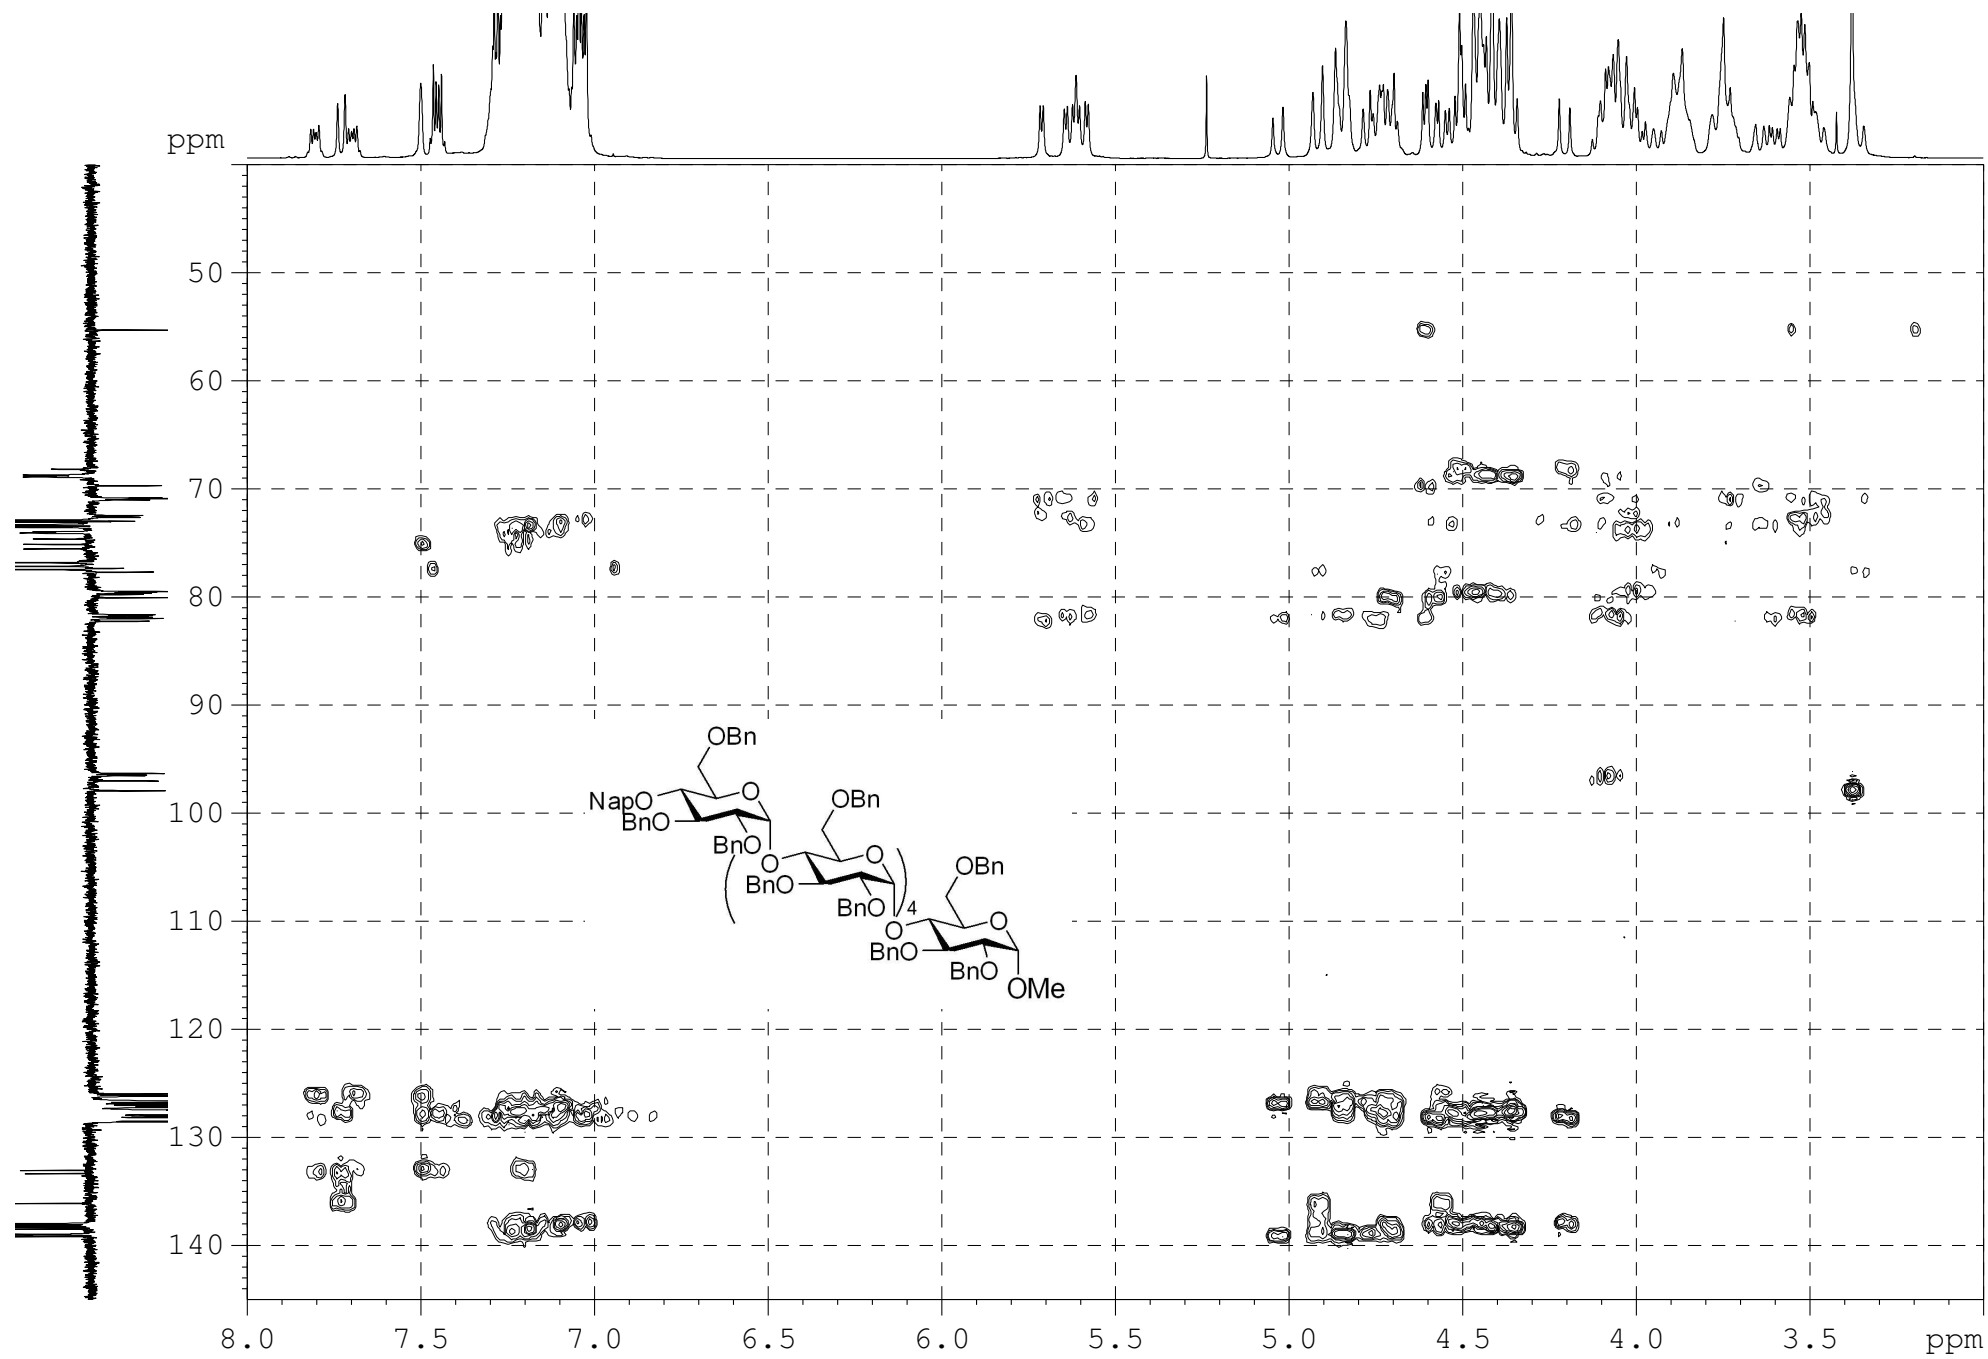





<sup>1</sup>H-NMR, <sup>13</sup>C-APT, <sup>1</sup>H-<sup>1</sup>H COSY, HSQC, HMBC, GATED of **21**

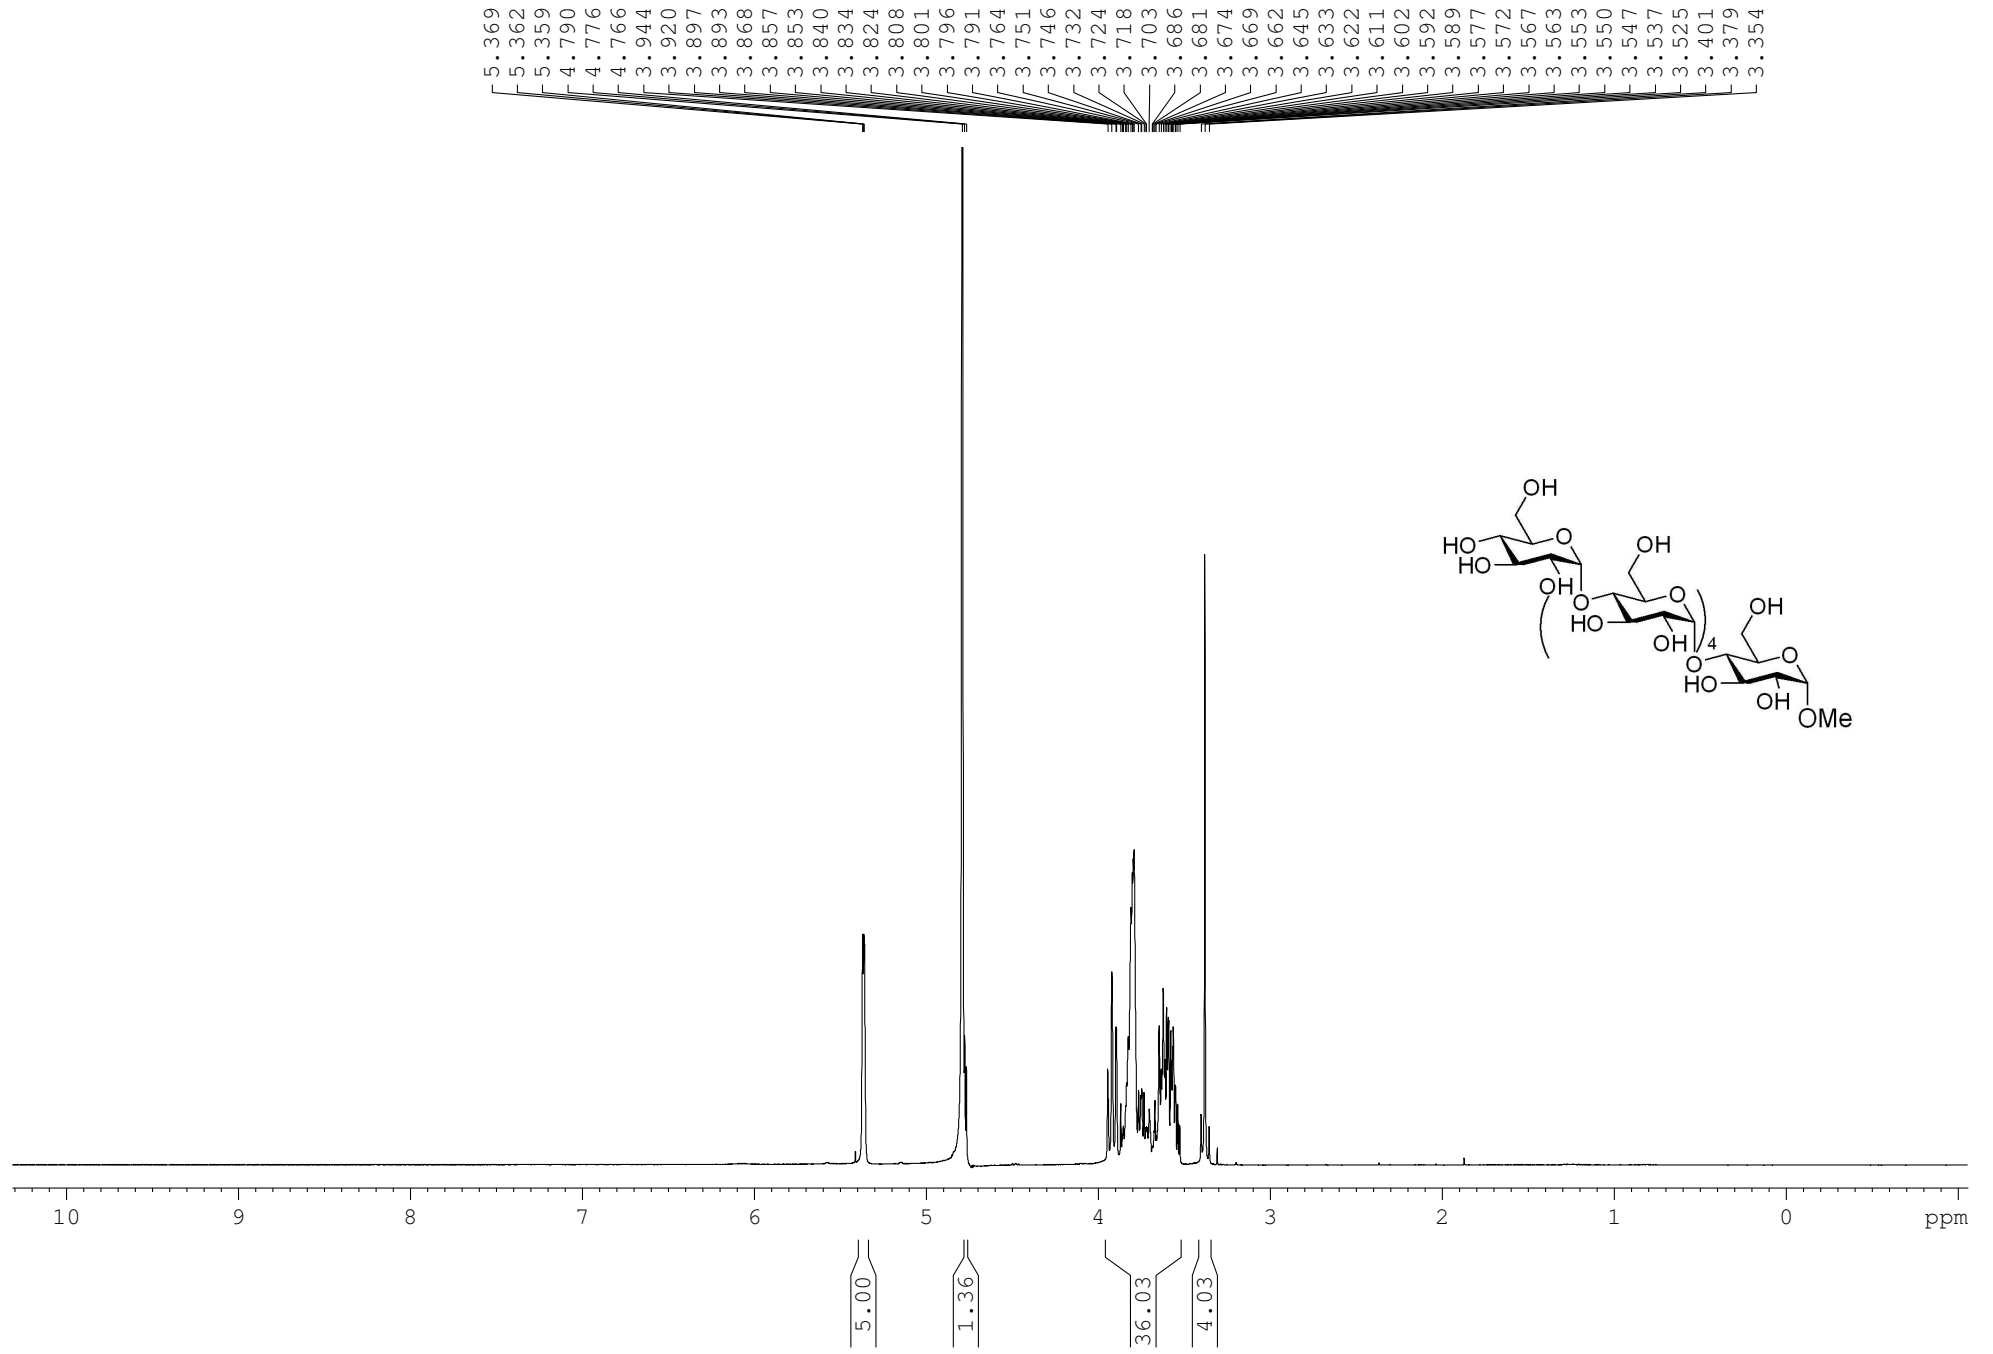

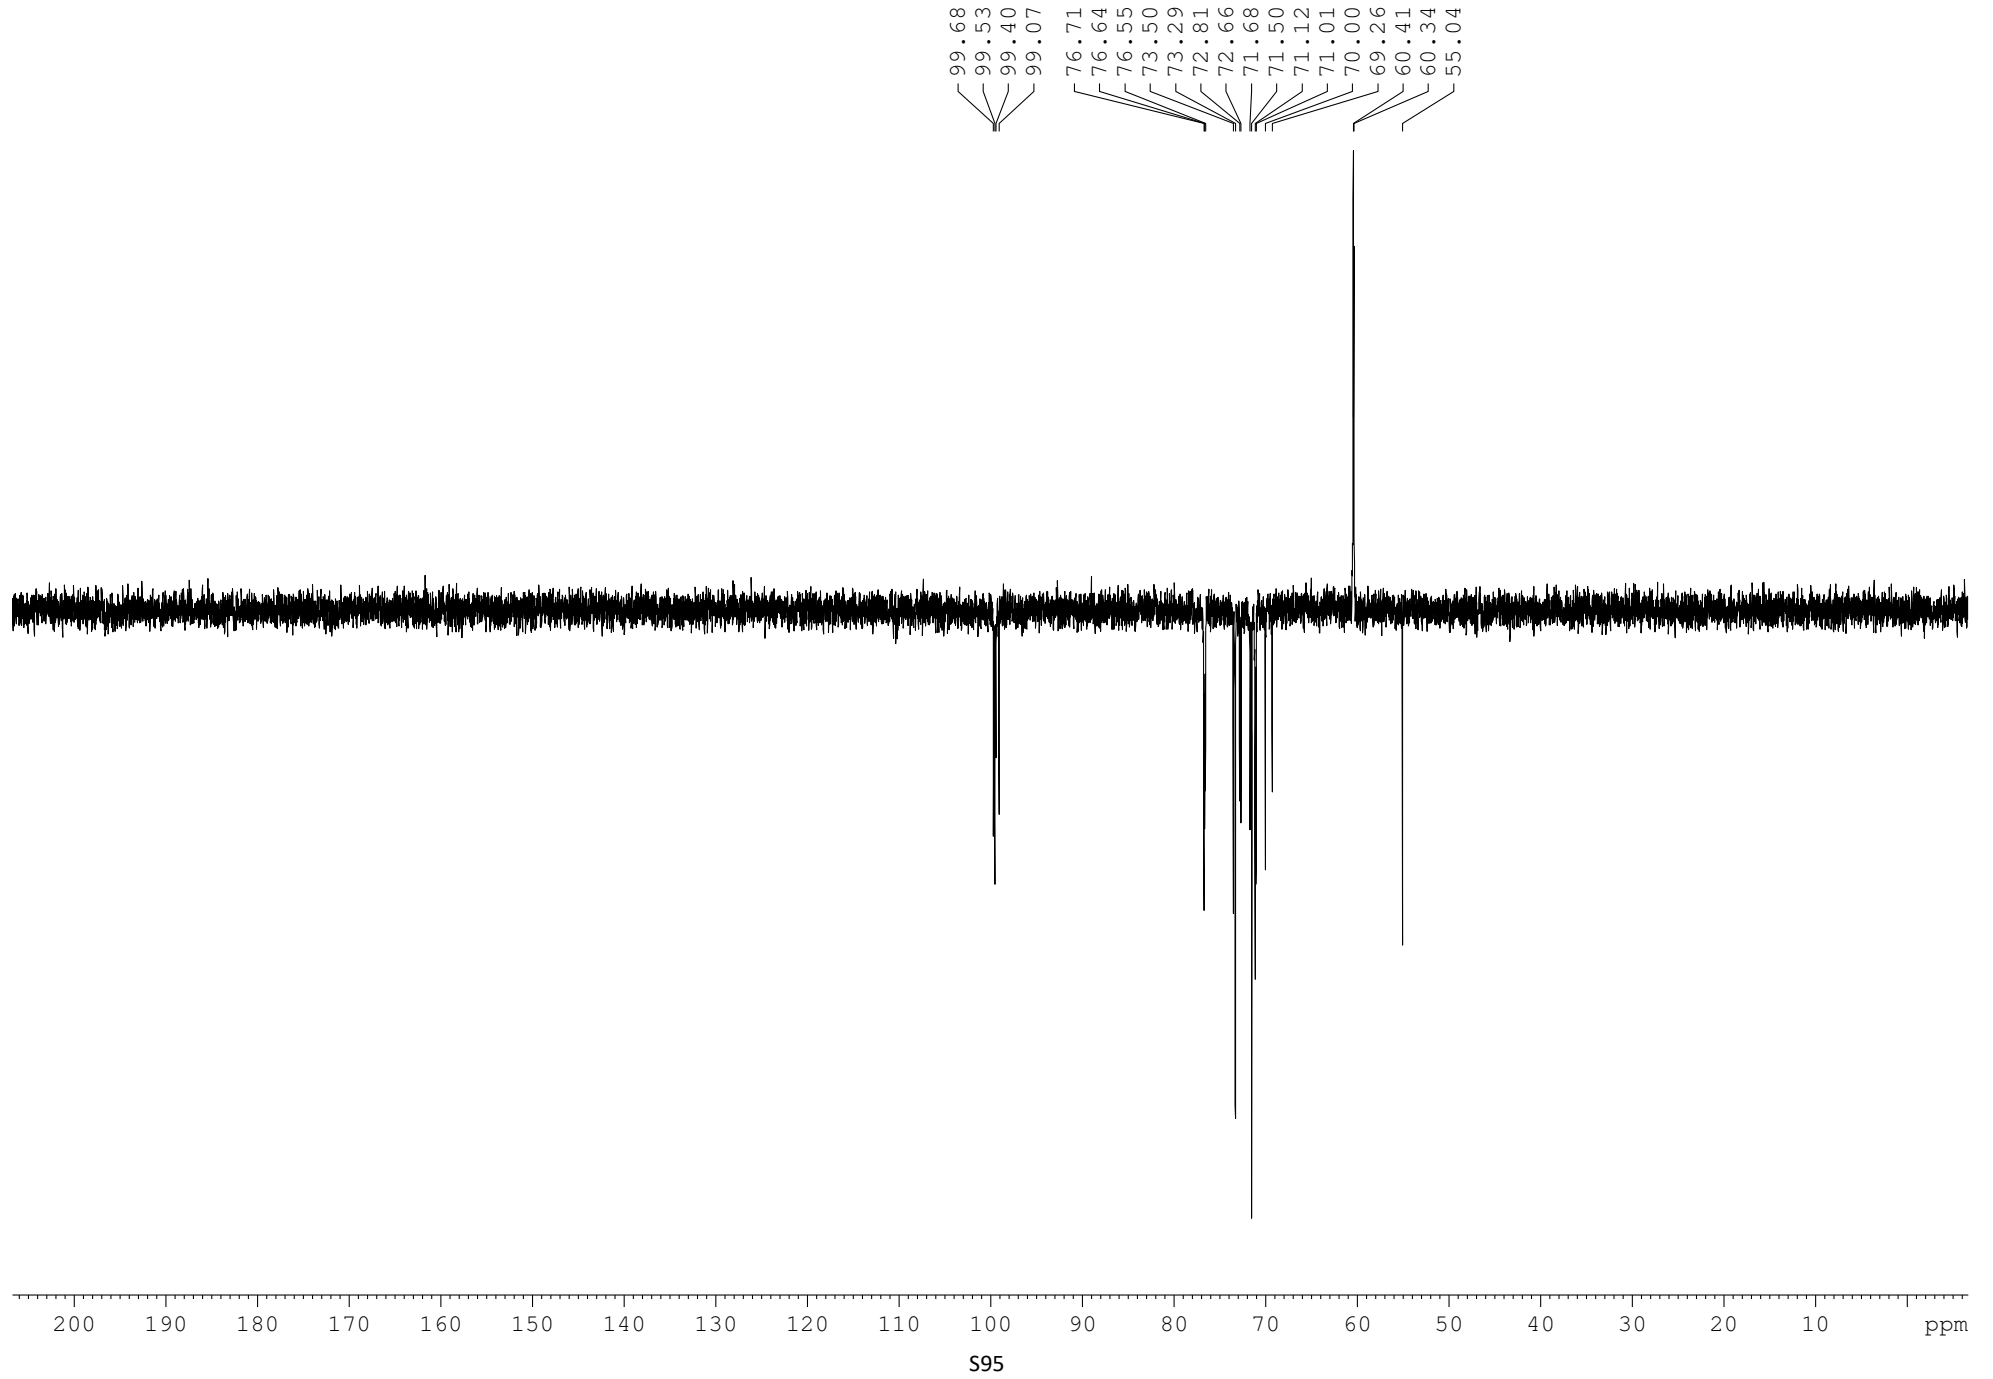

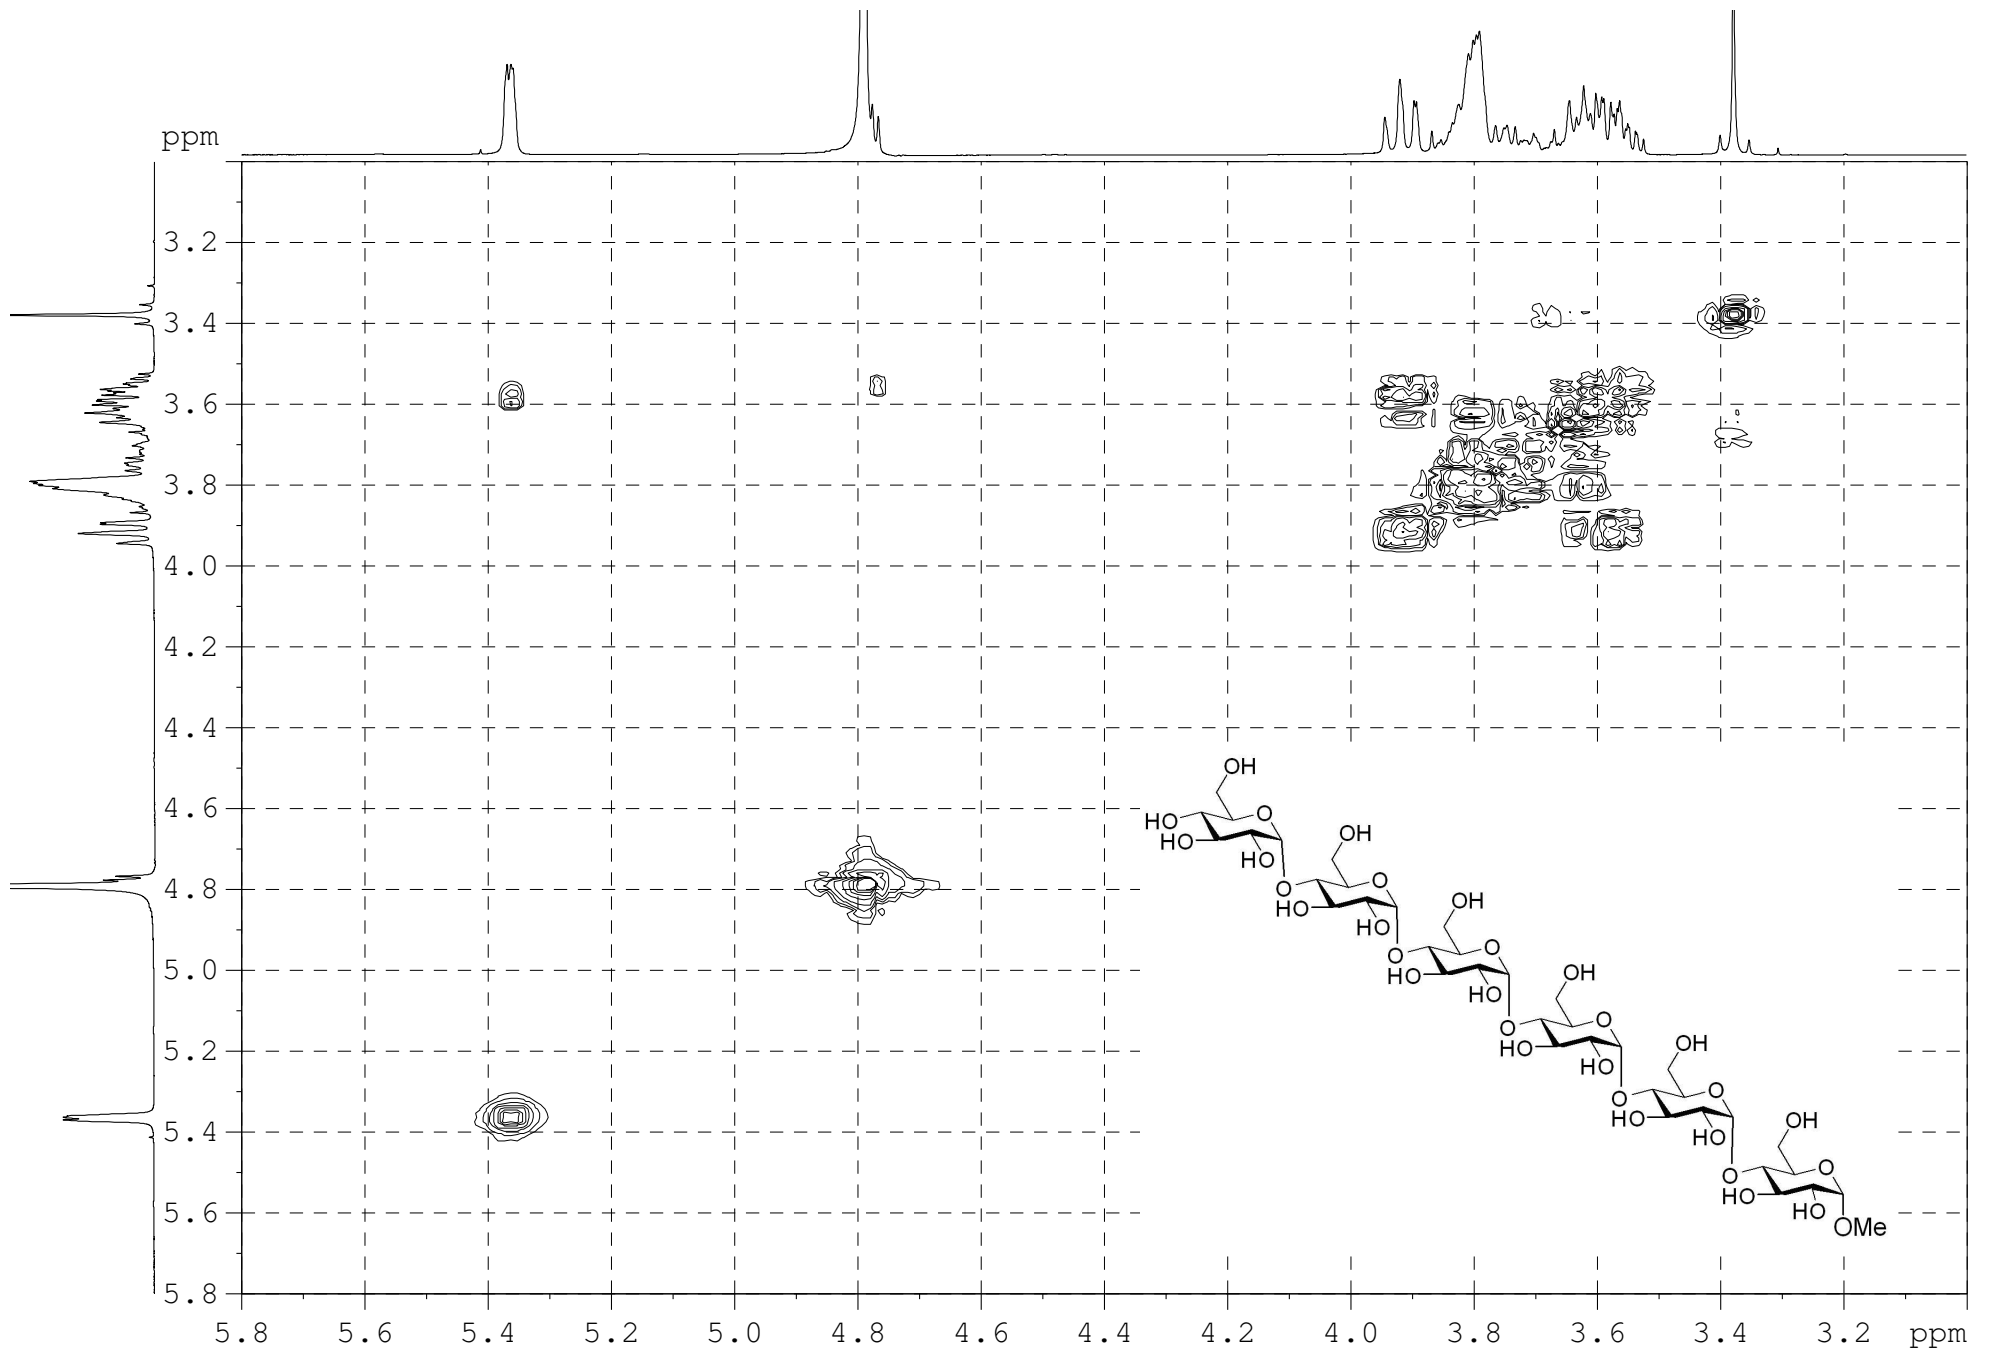



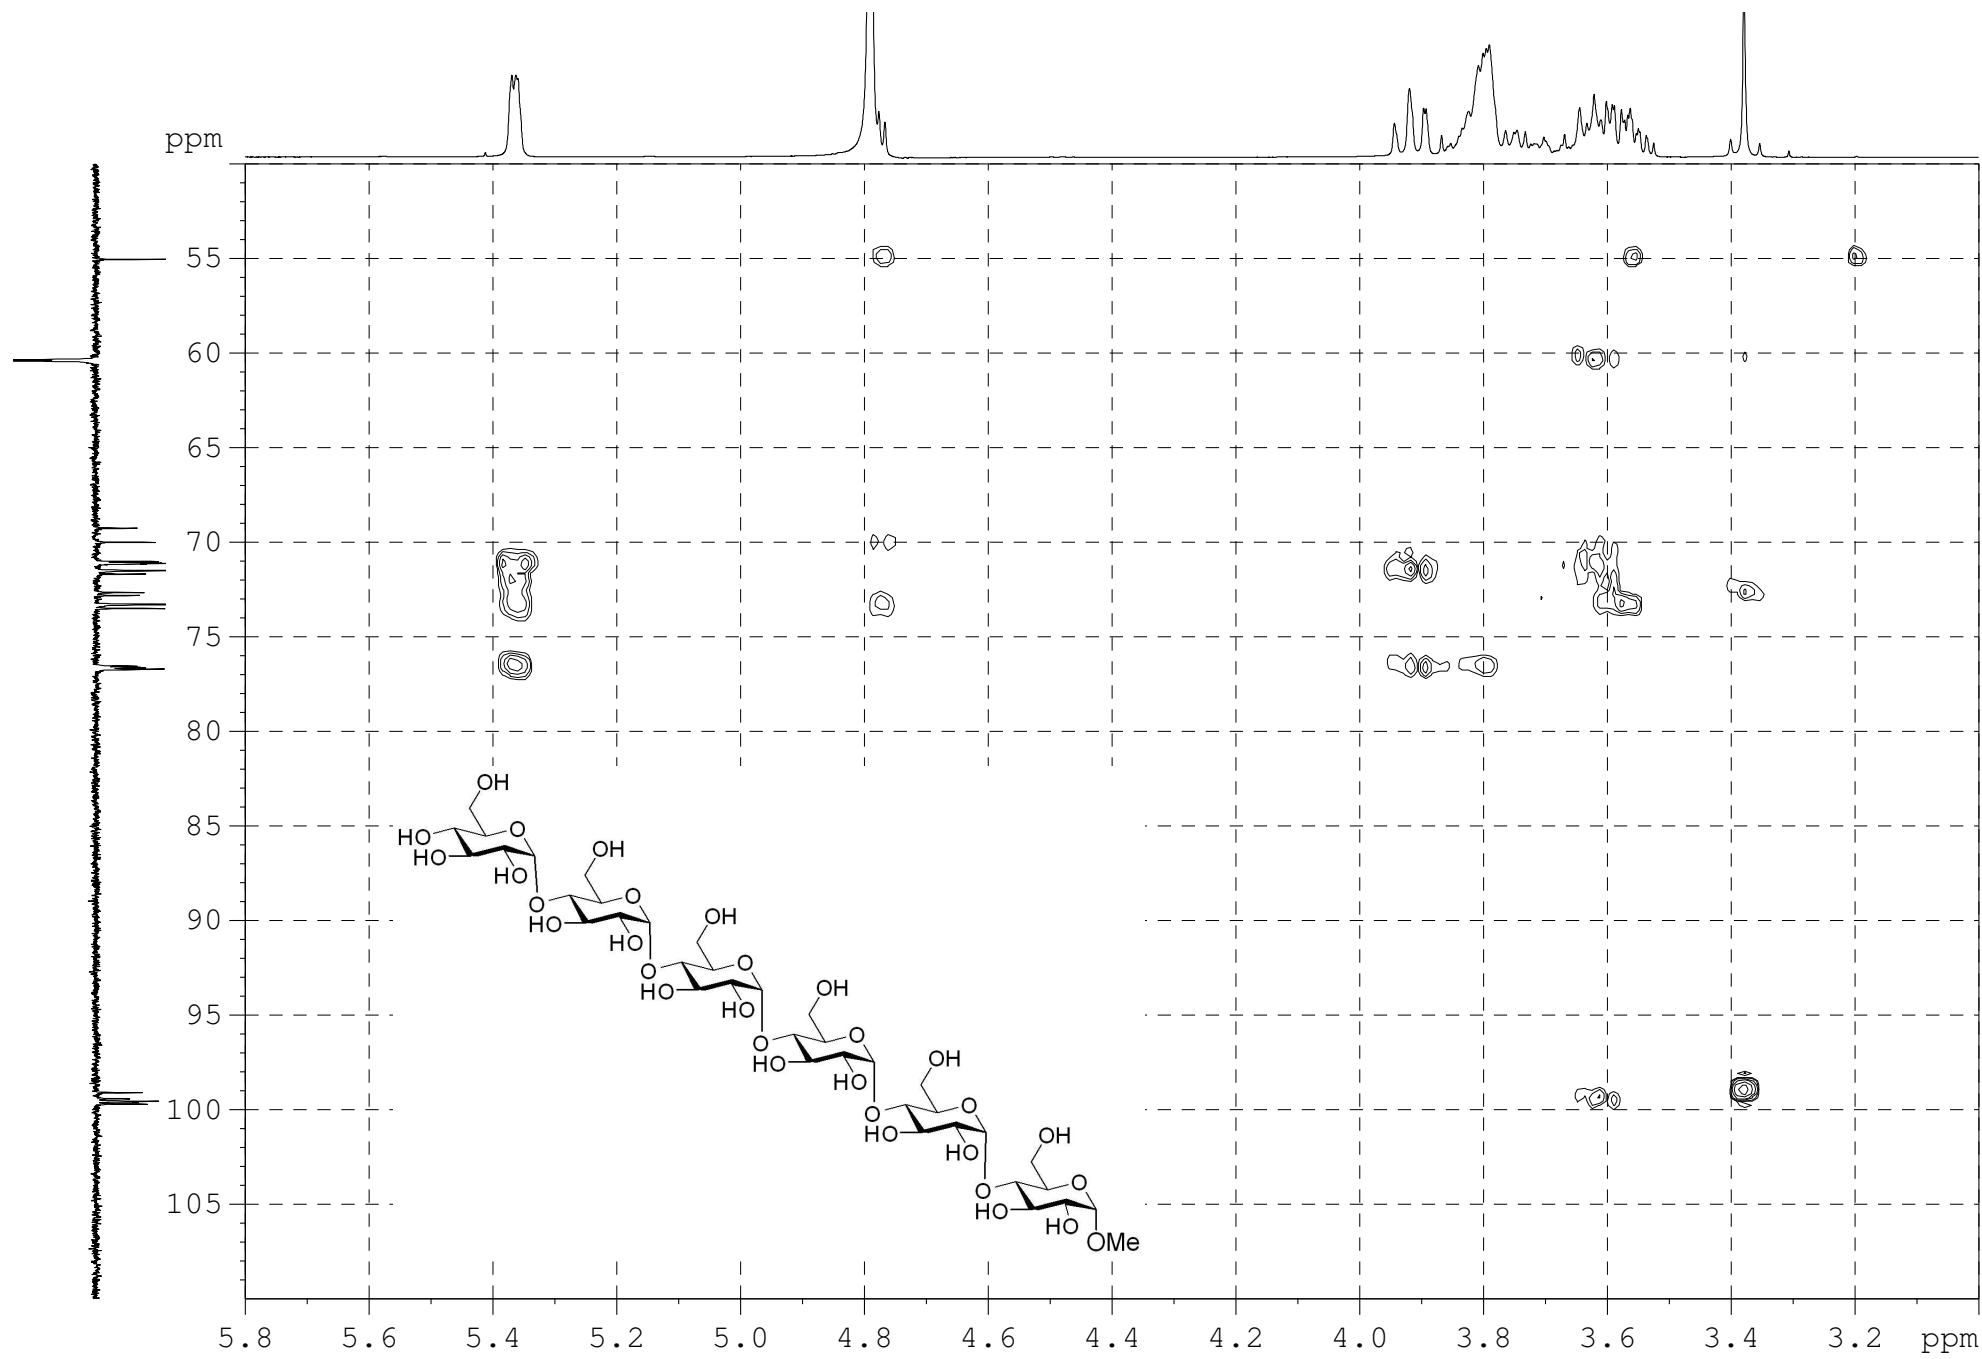

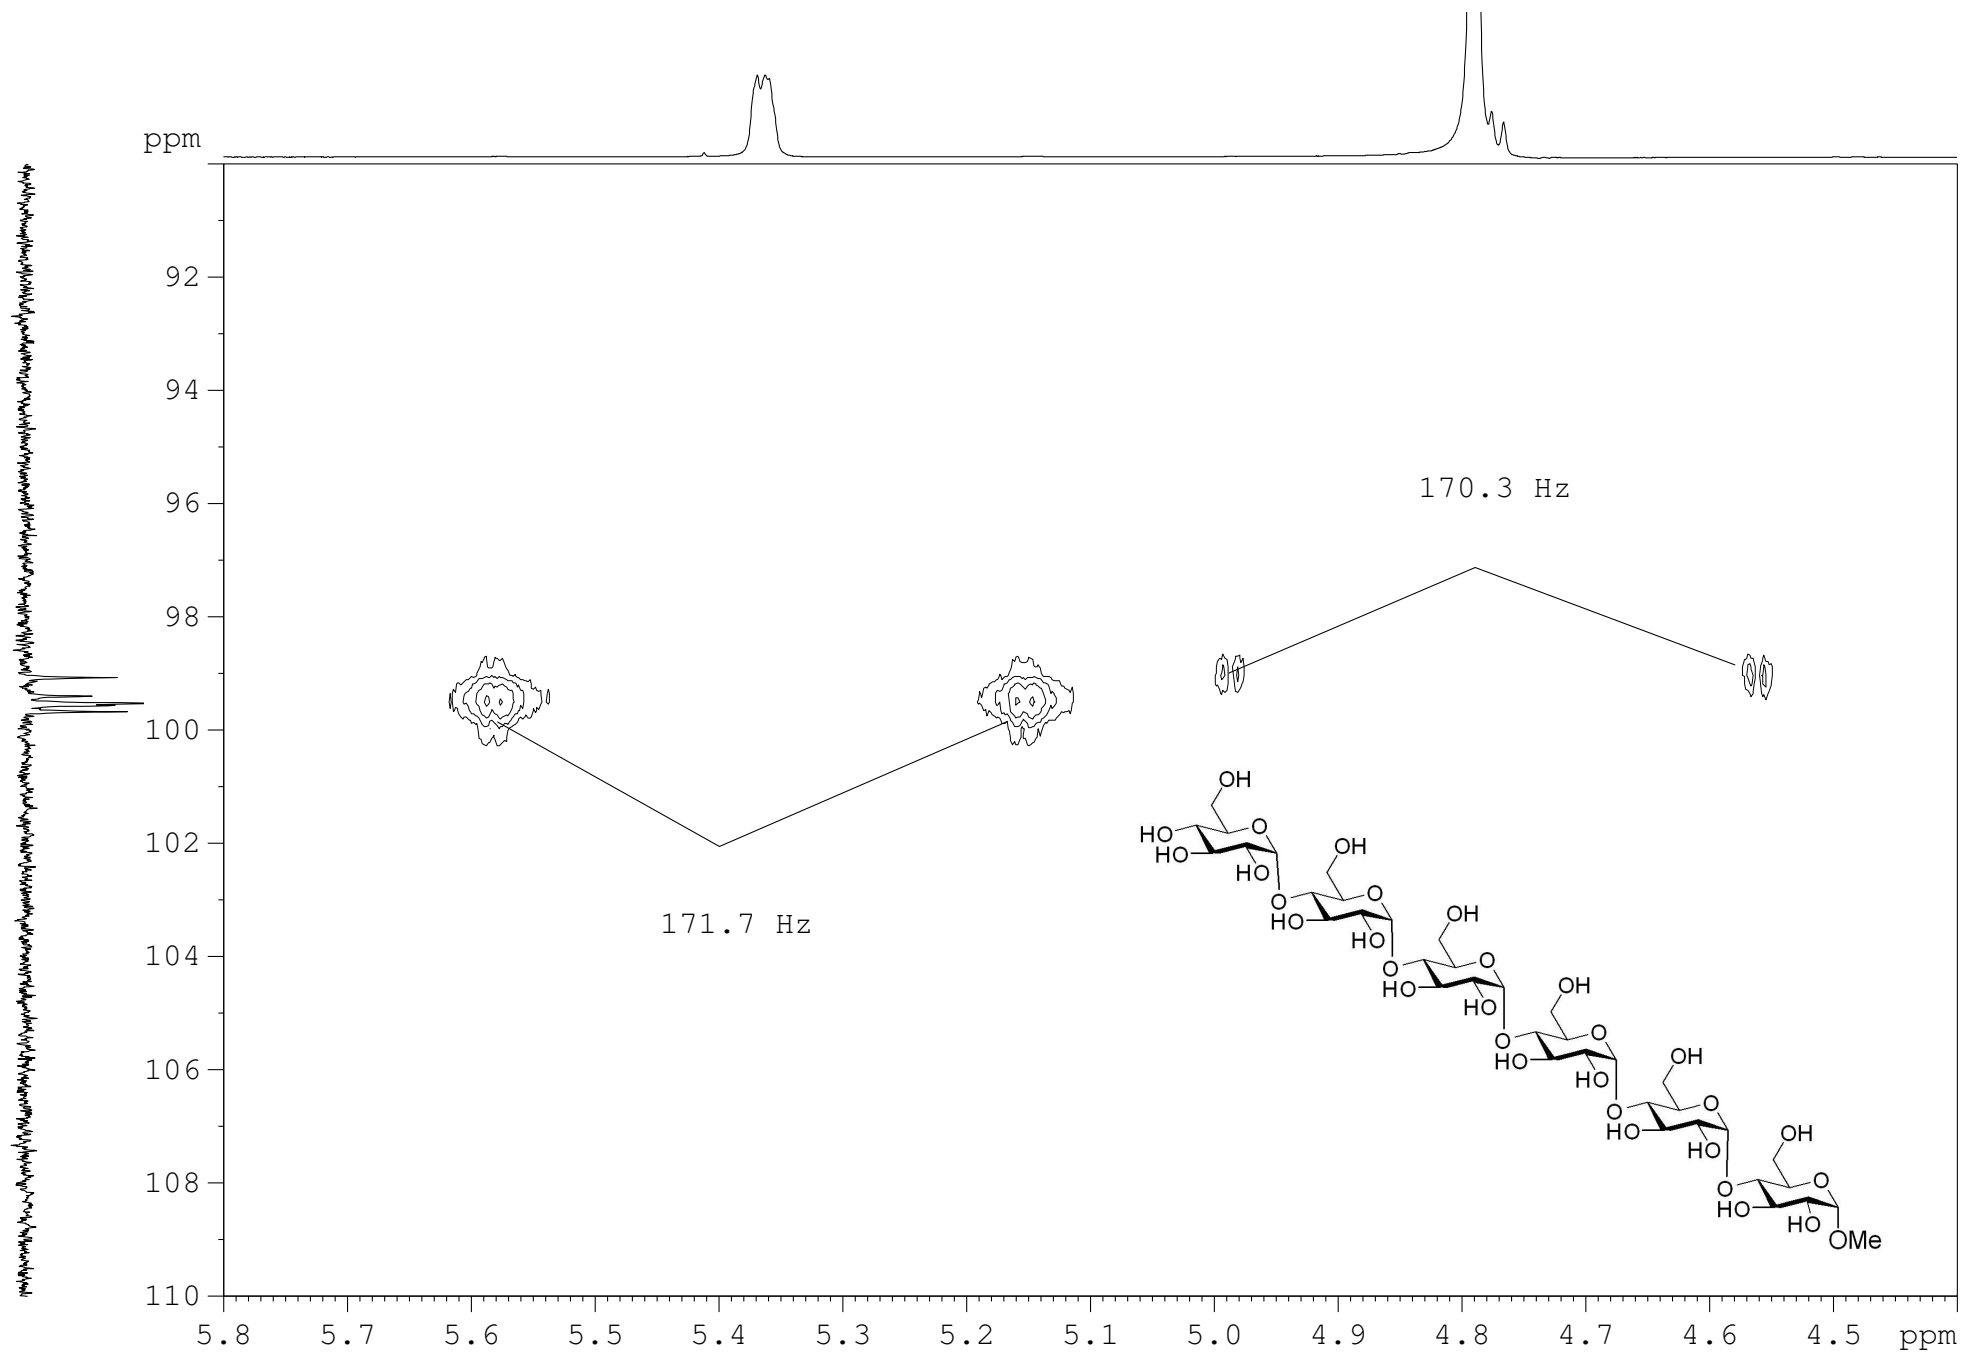

<sup>1</sup>H-NMR of 23

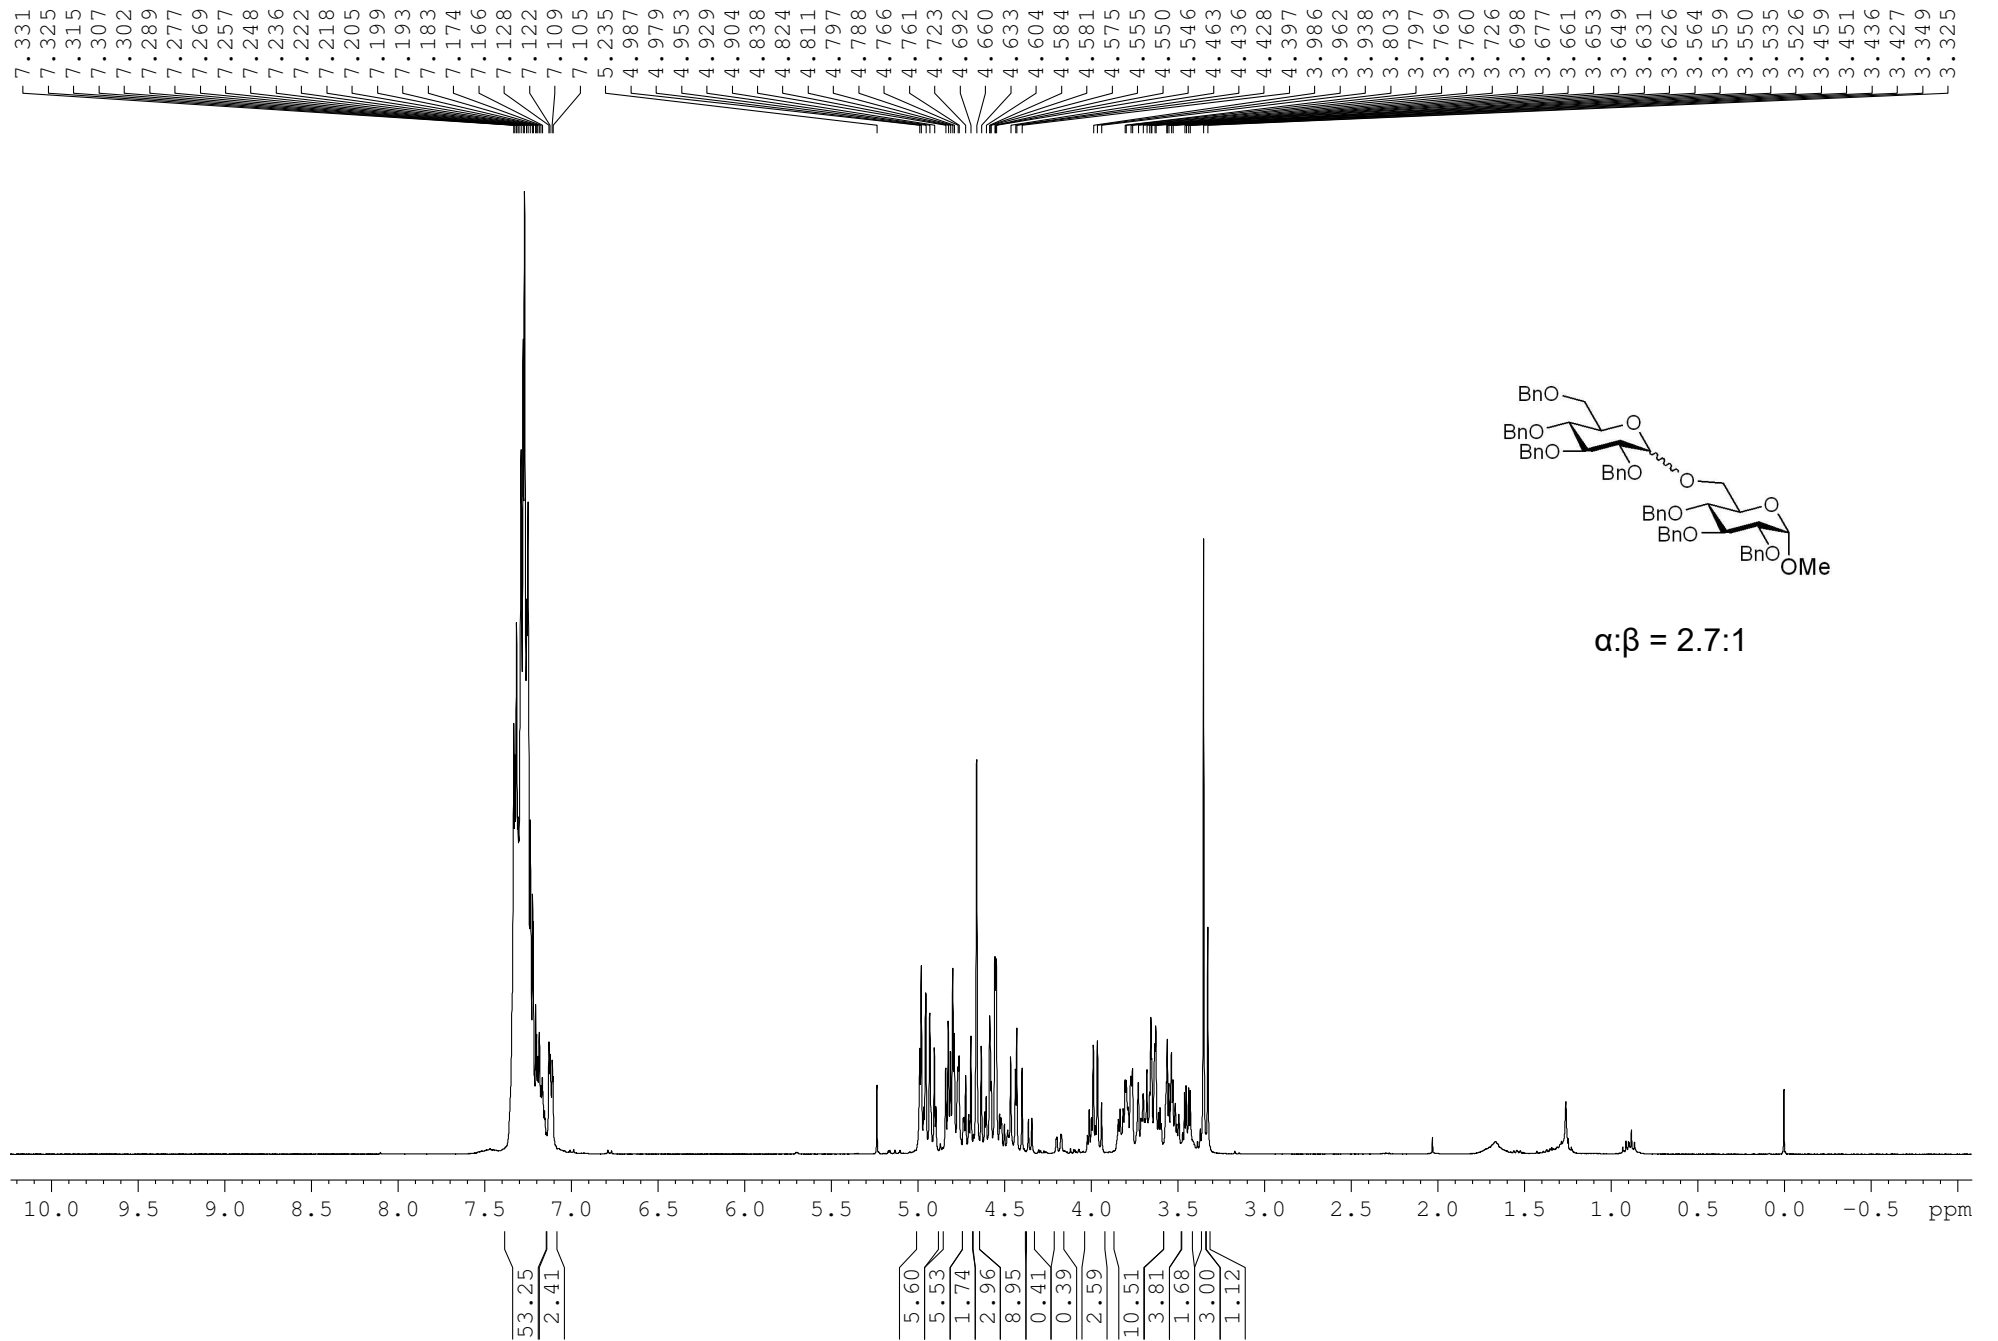



$^1\text{H-NMR}$ ,  $^{13}\text{C-APT}$ ,  $^1\text{H-}^1\text{H COSY}$ , HSQC, HMBC, GATED of **24**,  $\alpha:\beta = 3:1$

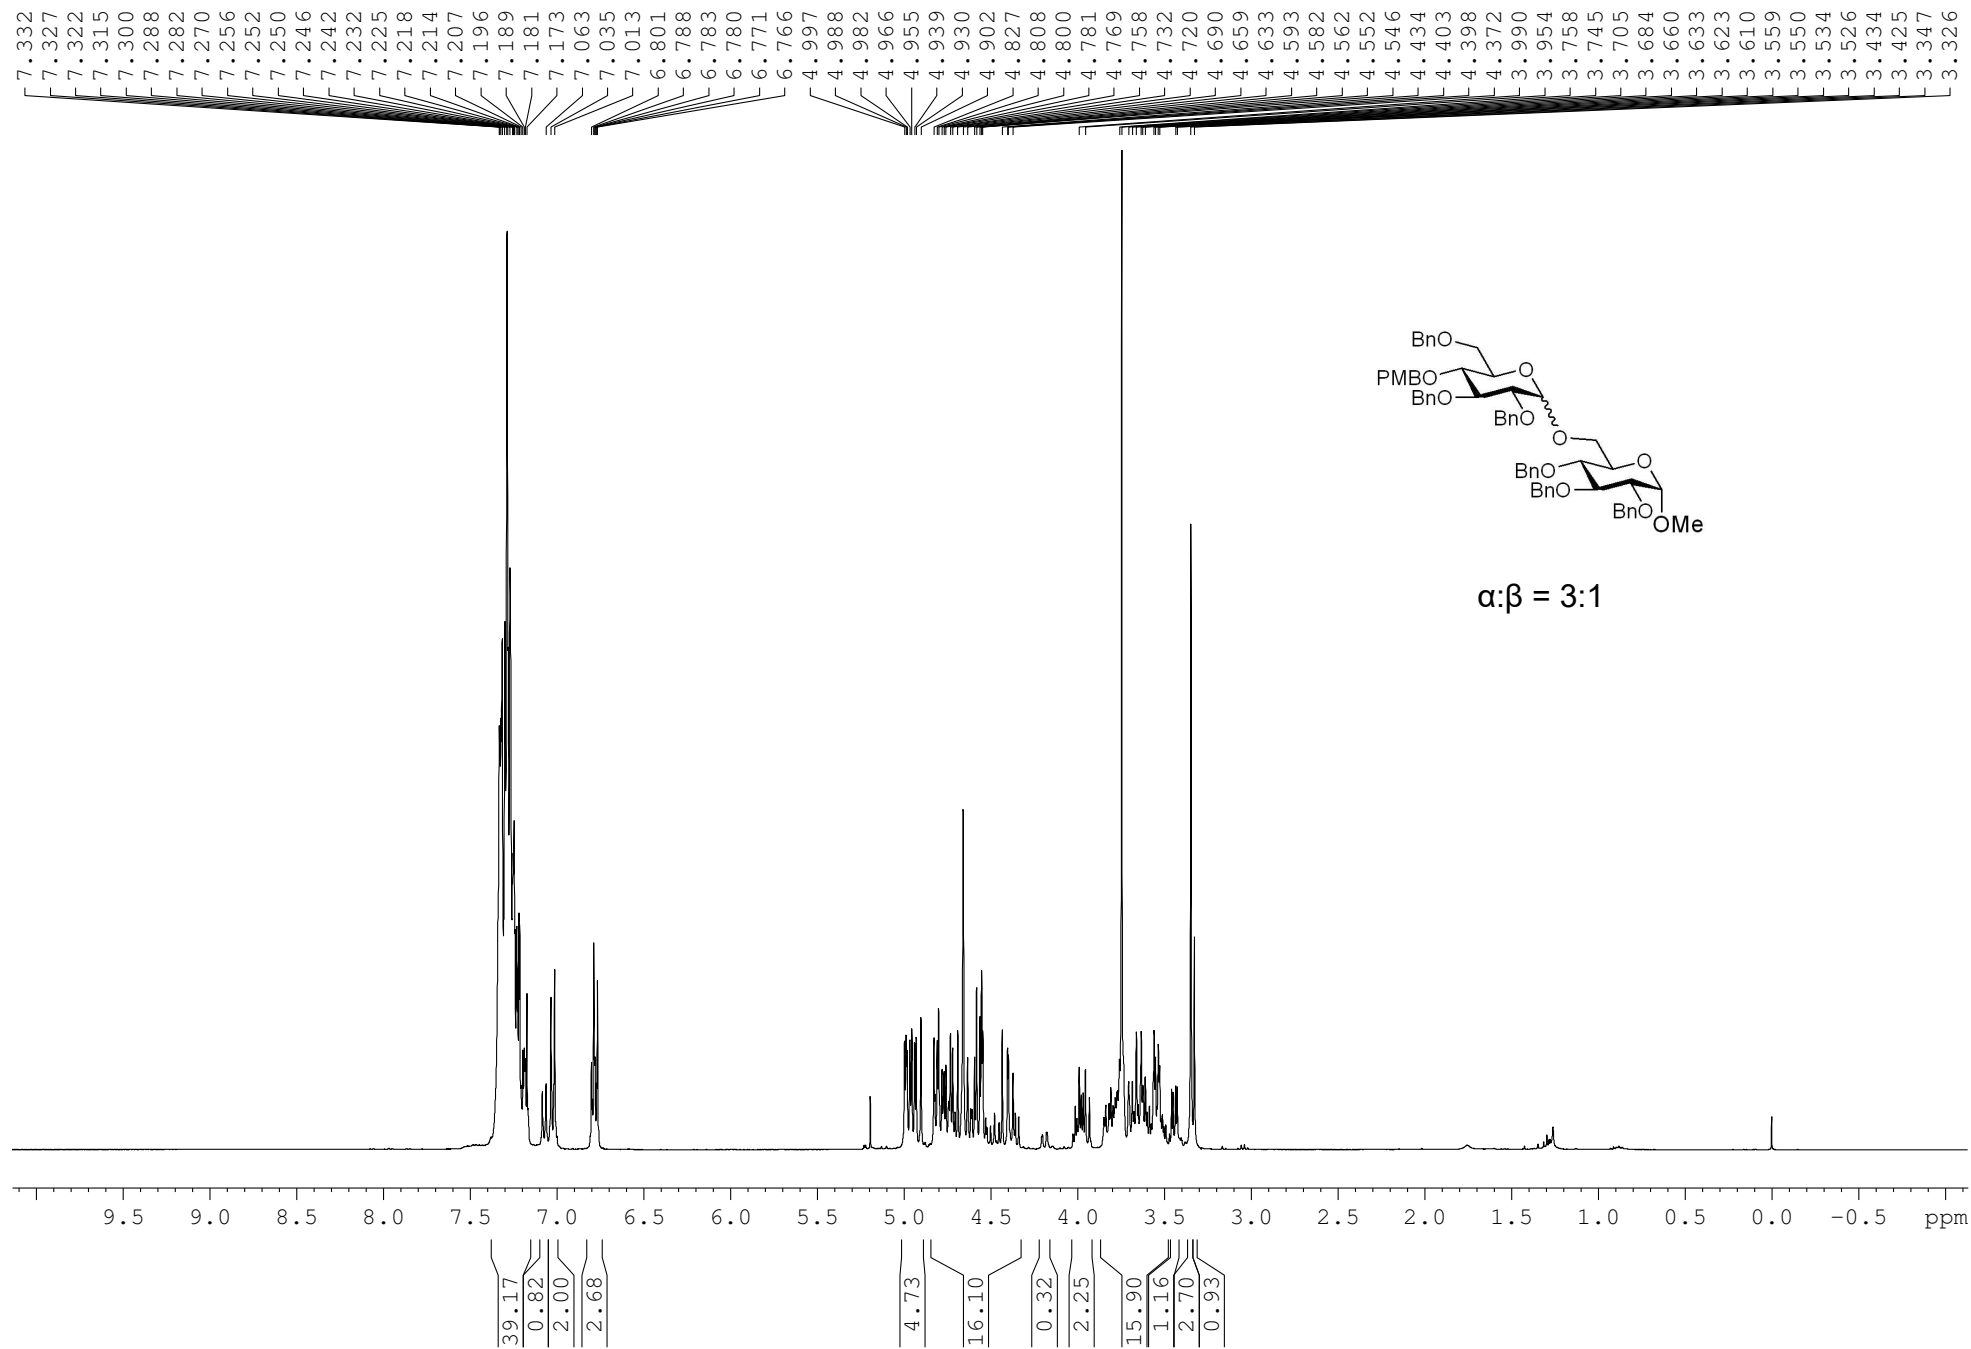

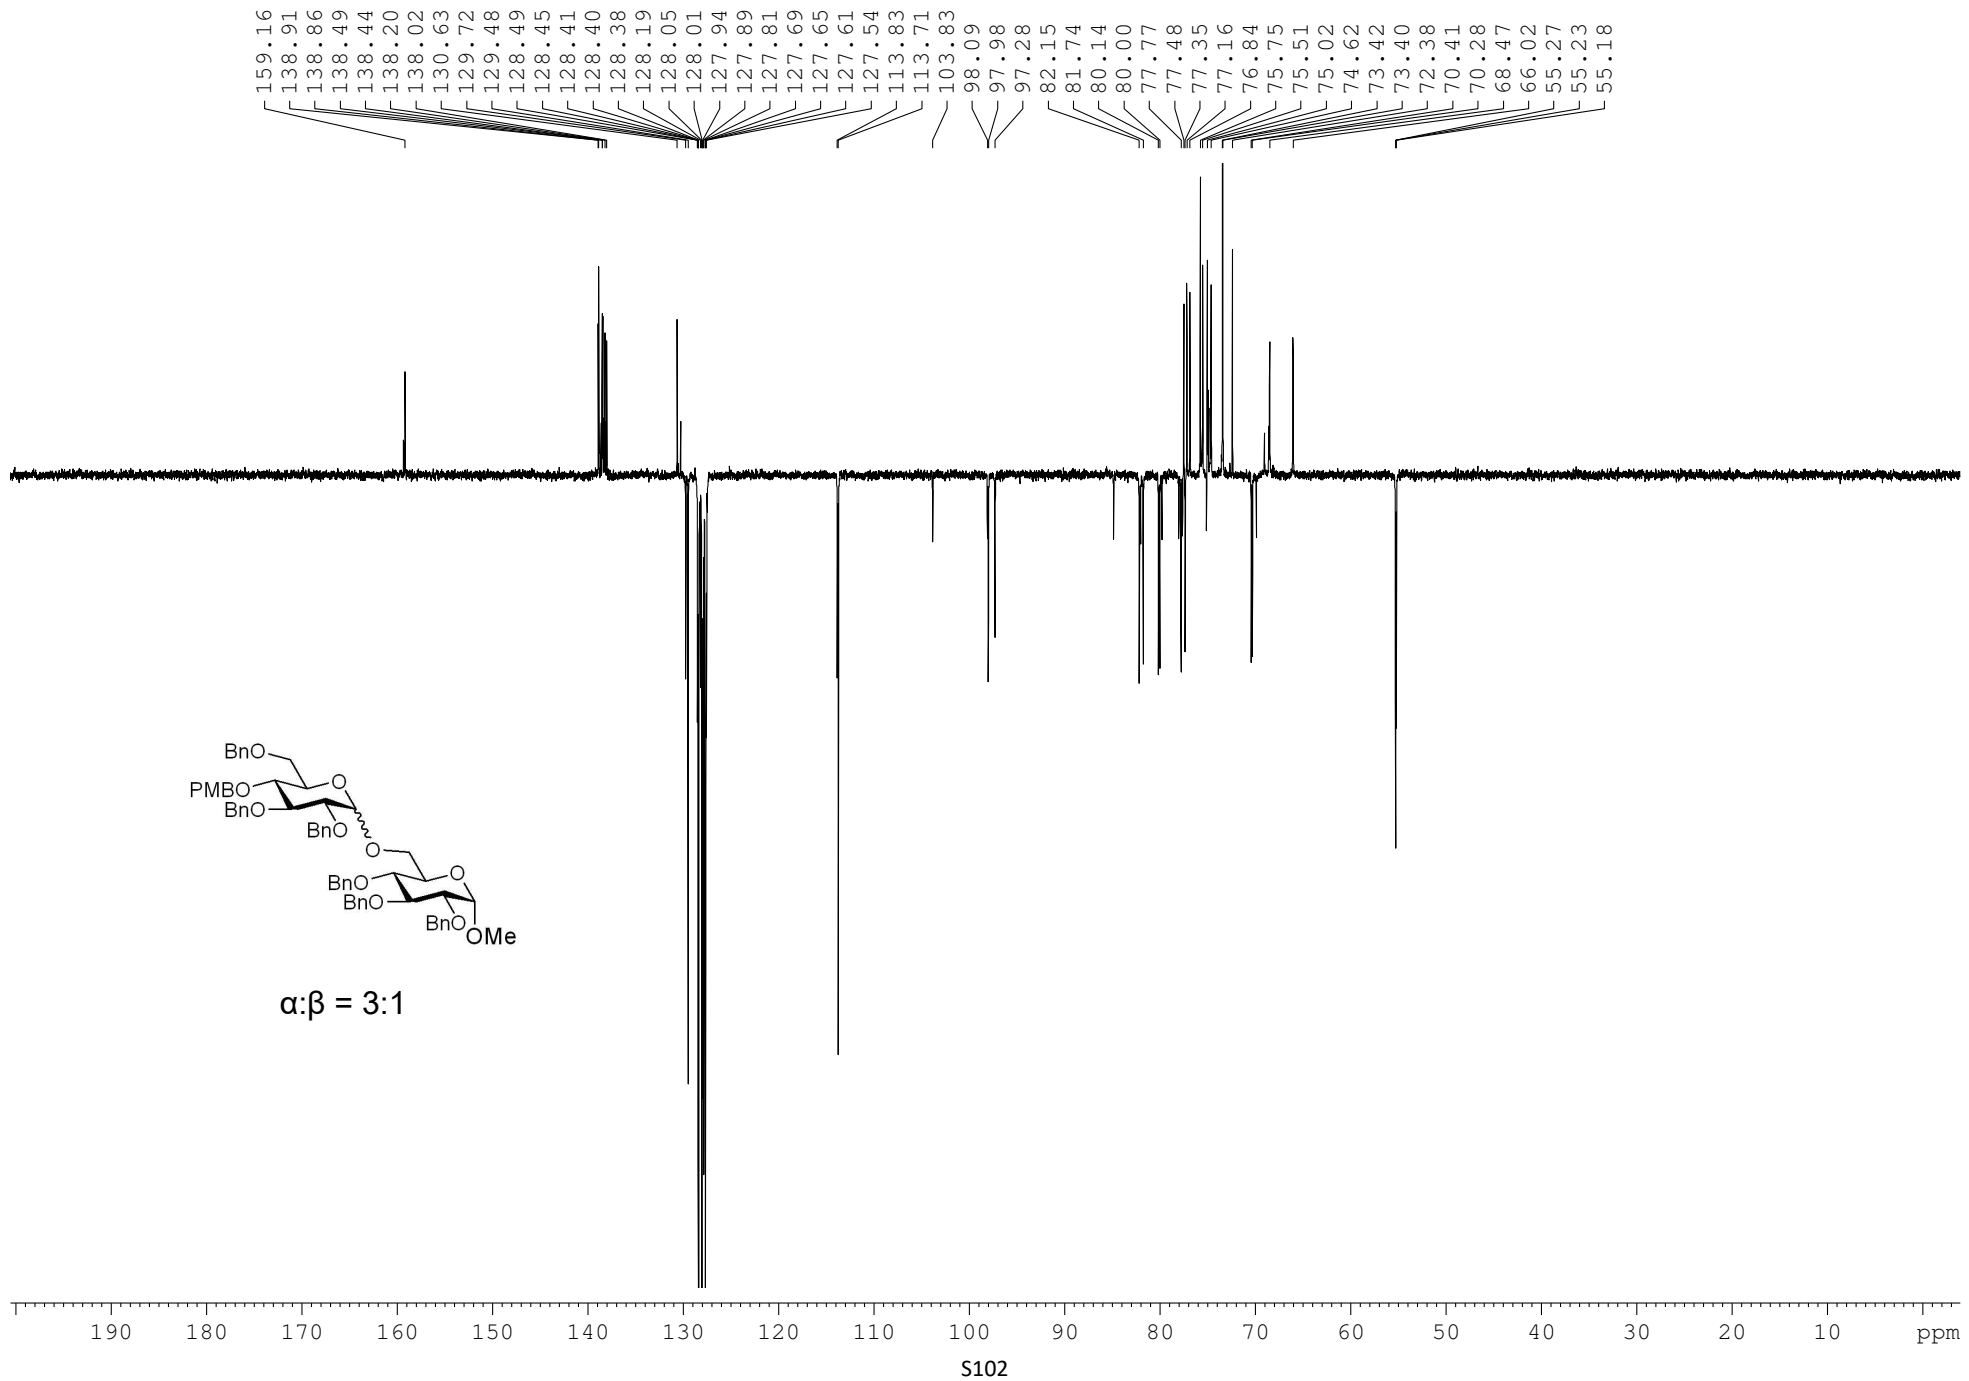

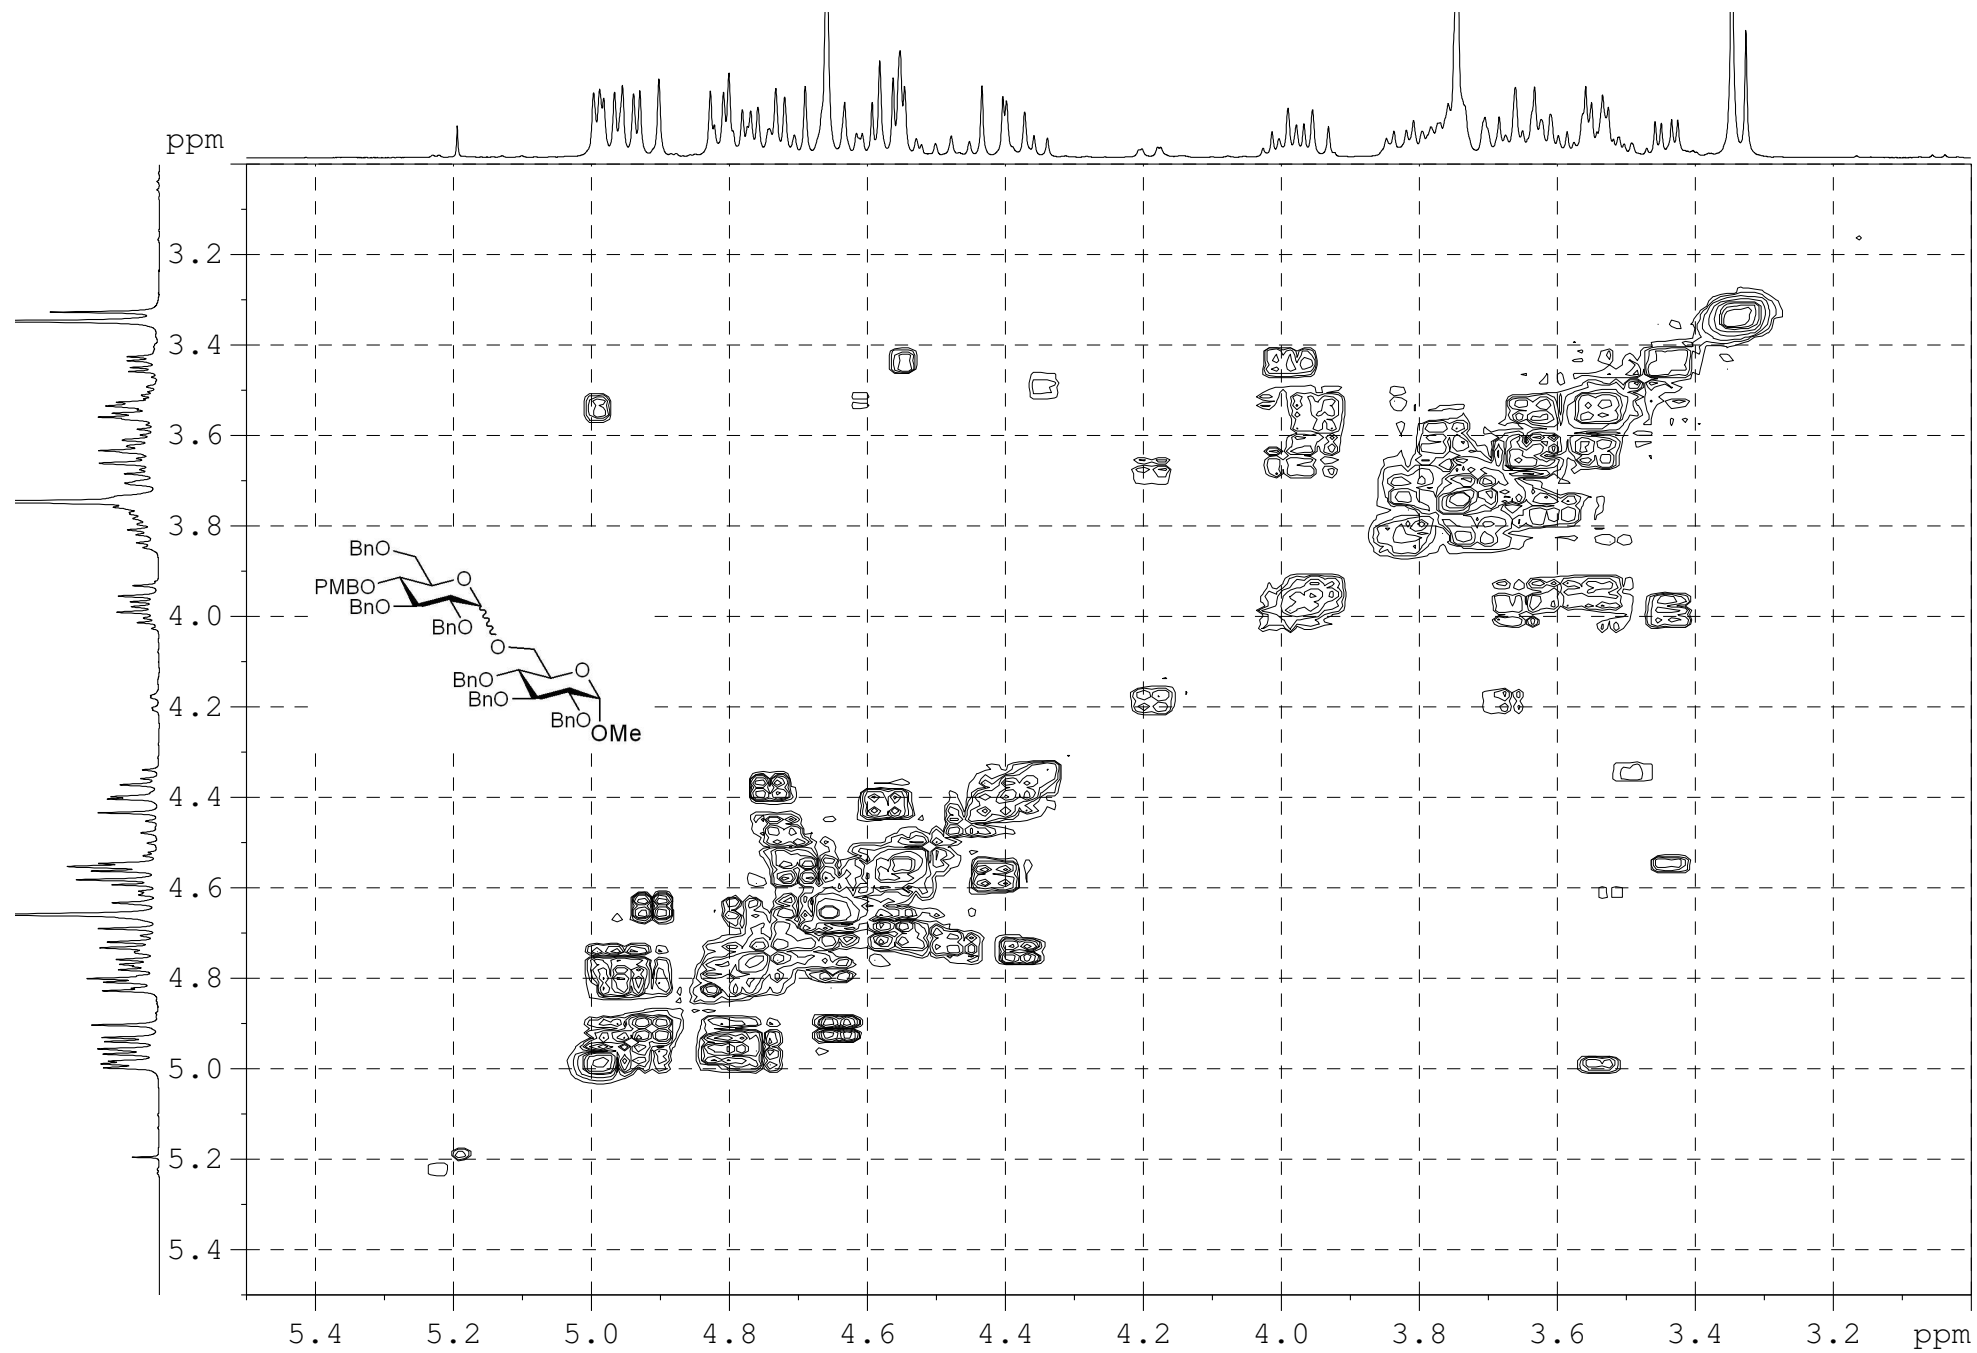

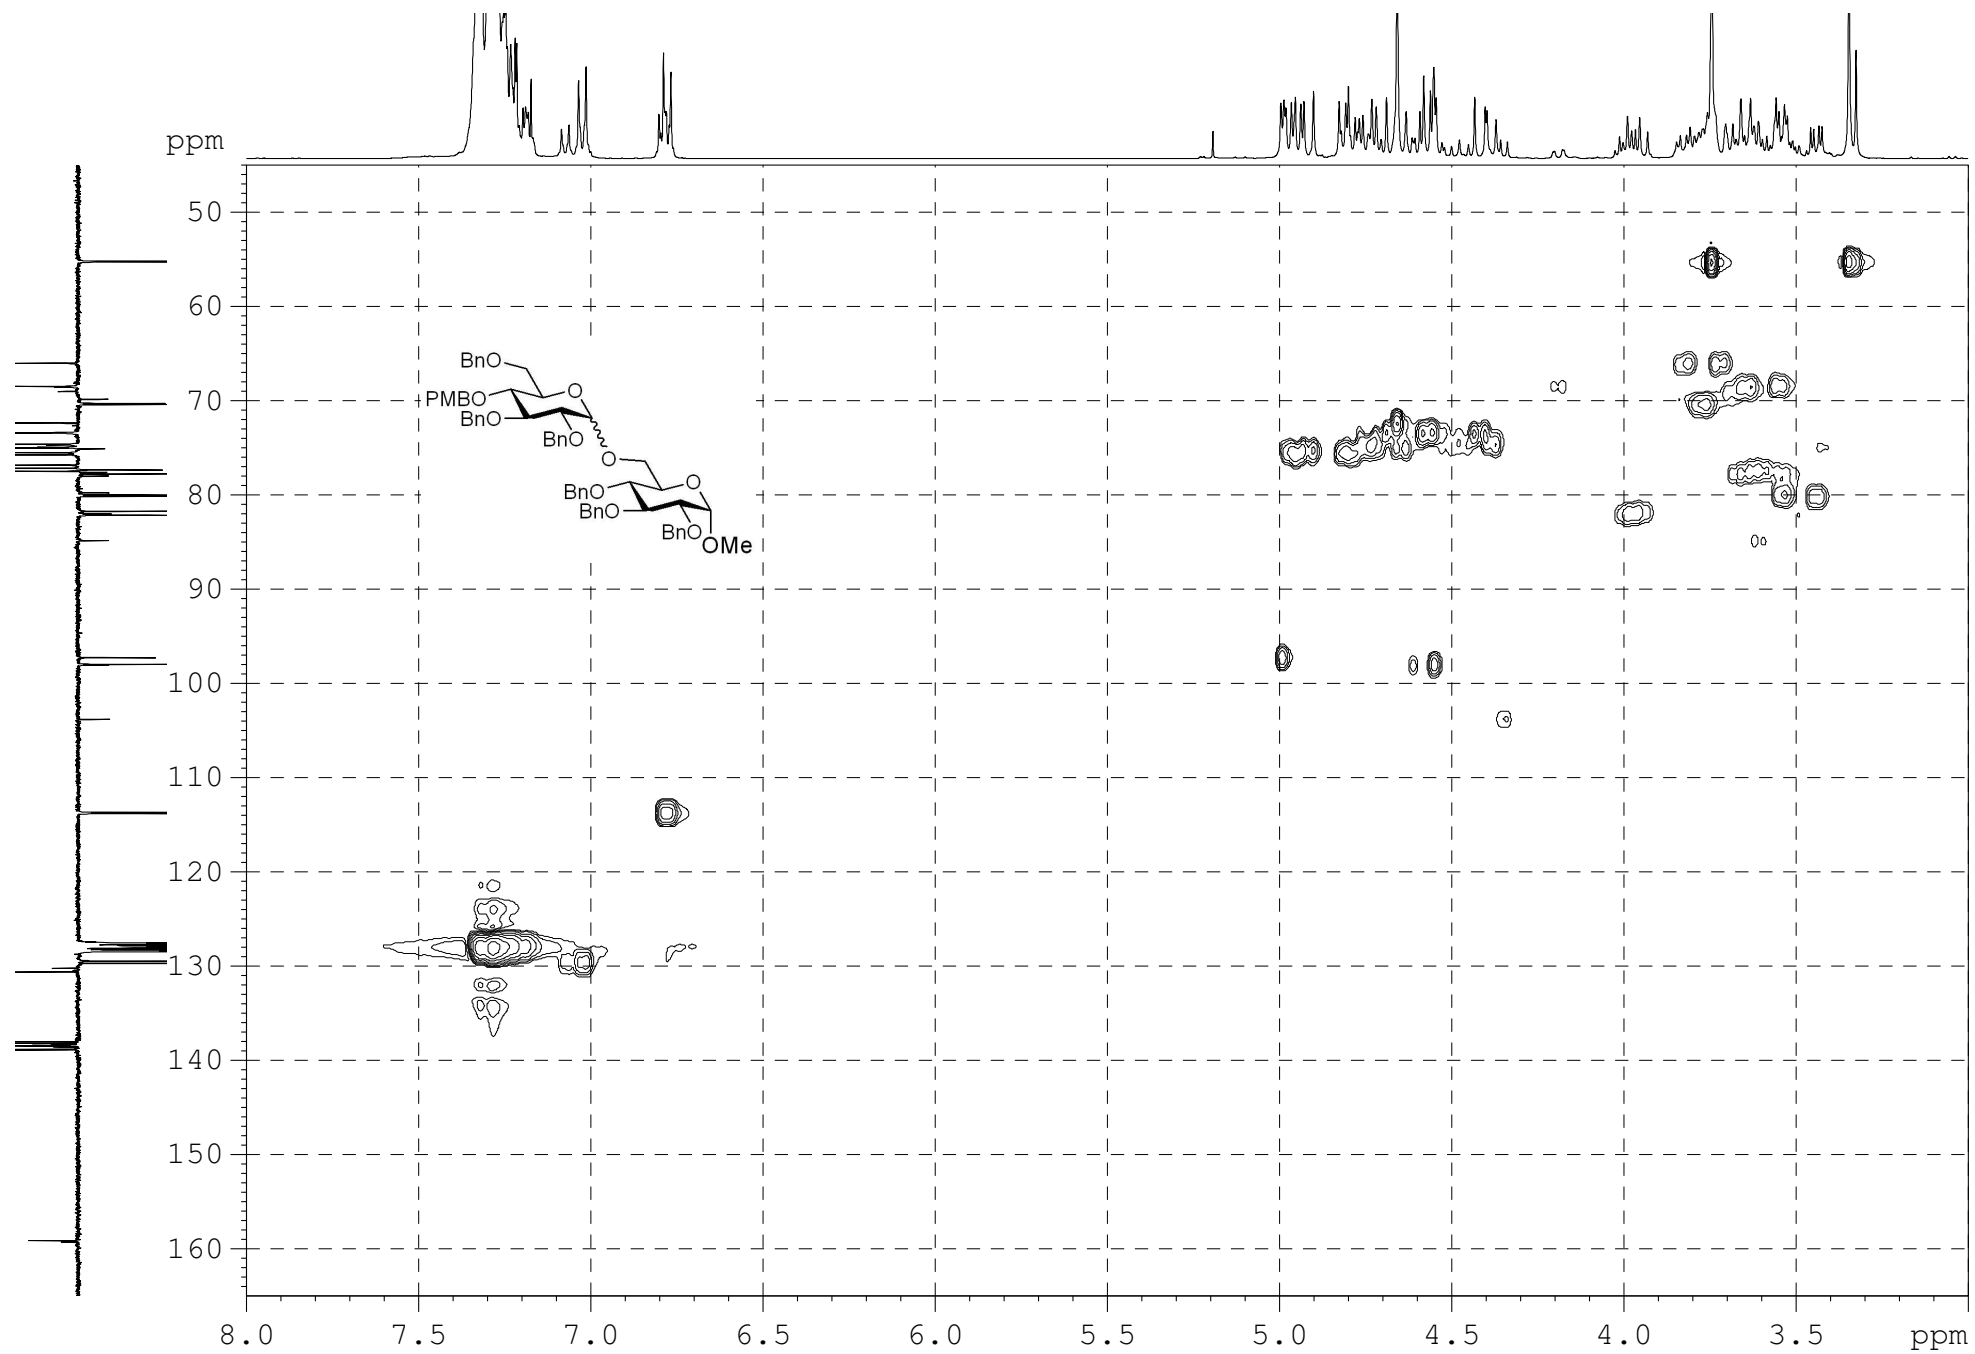

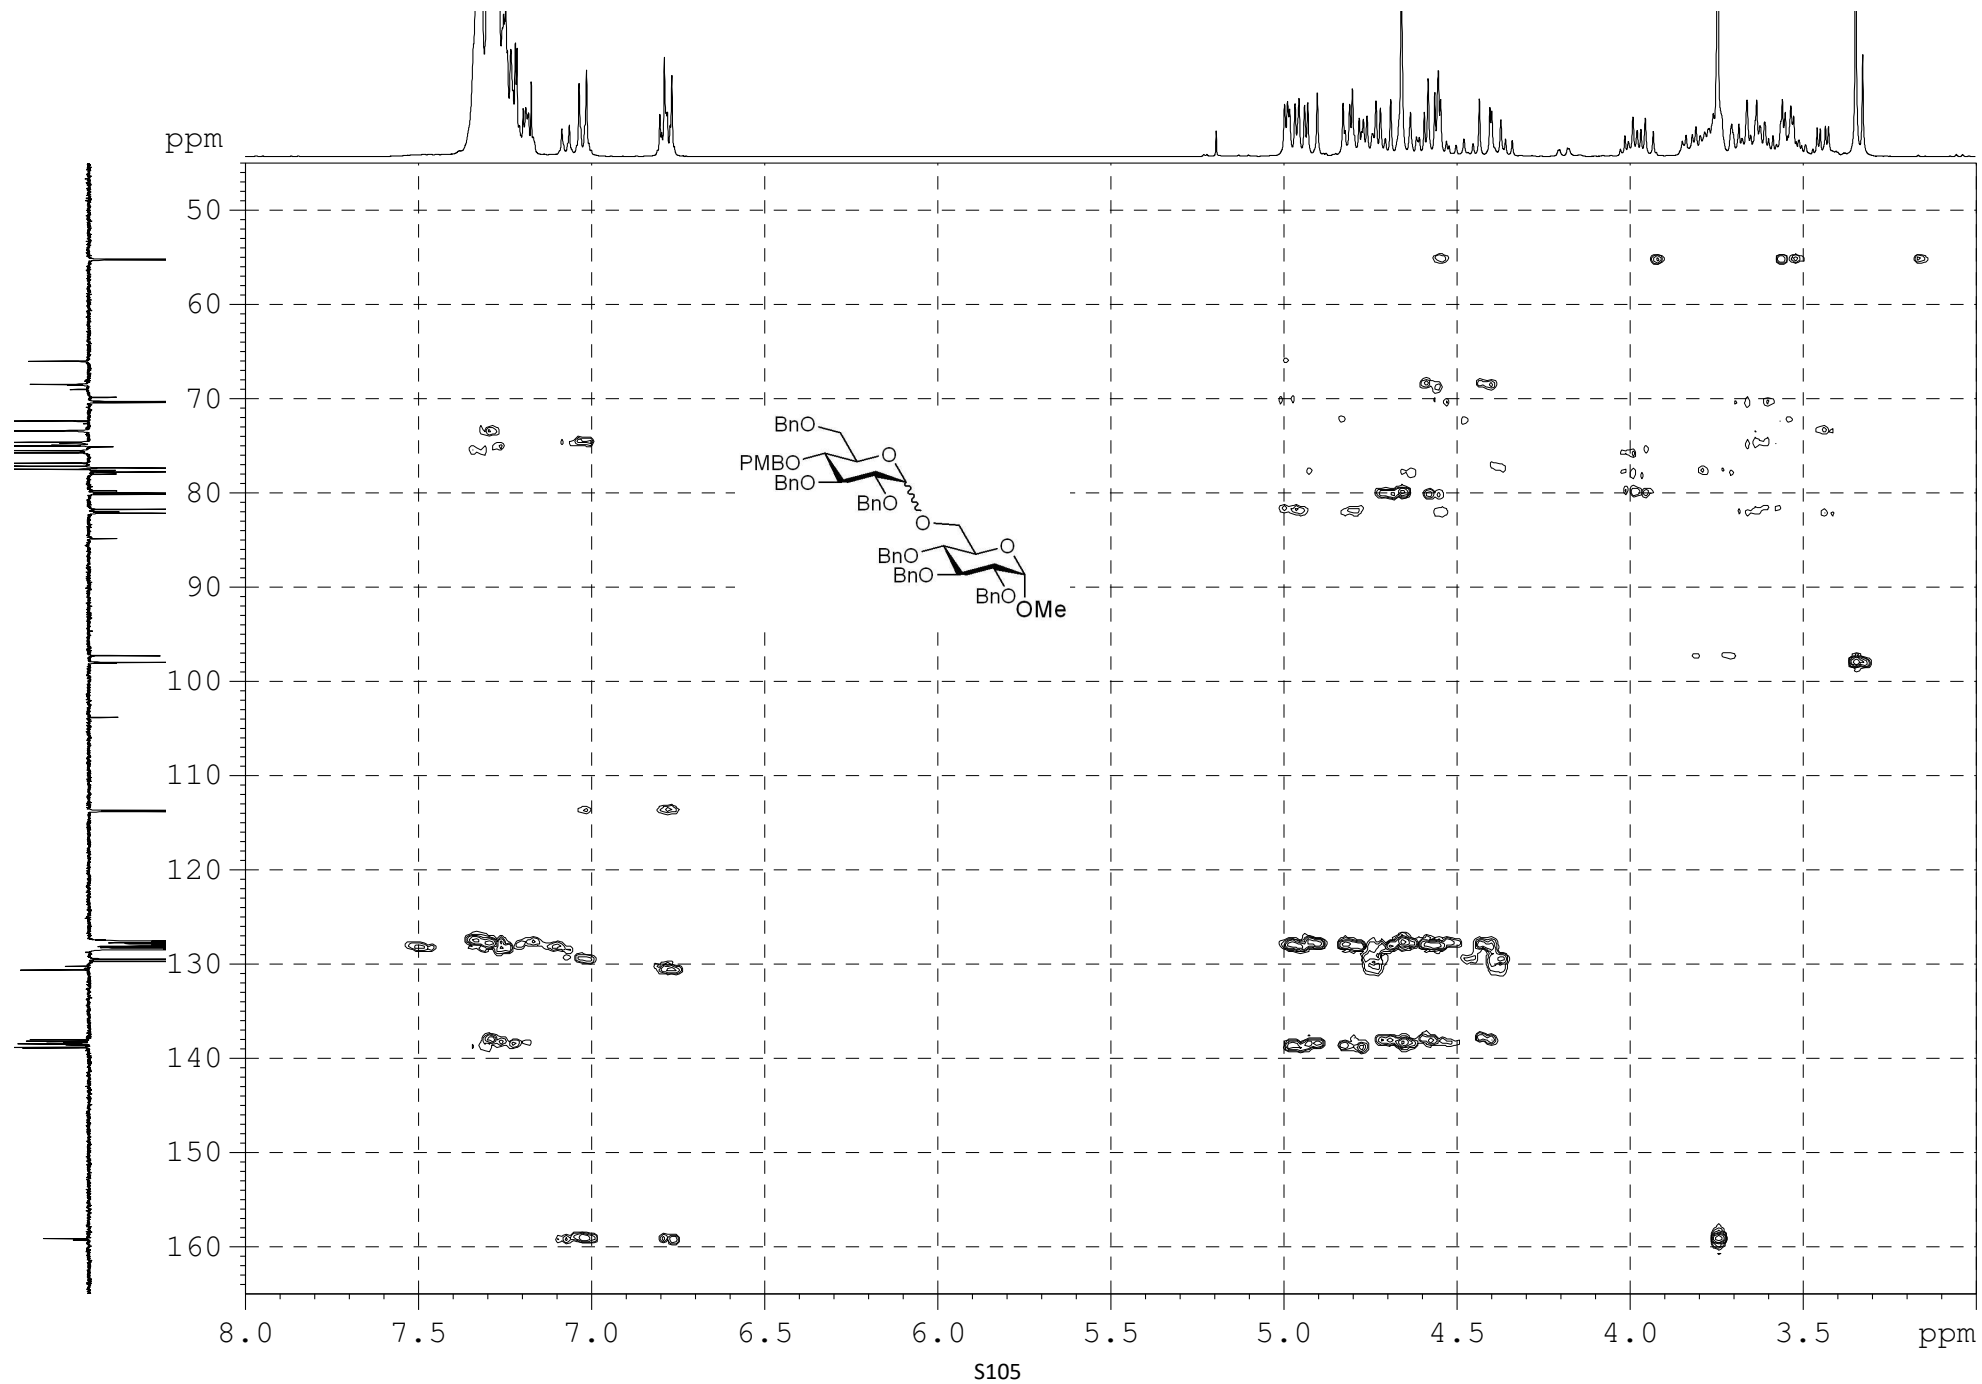

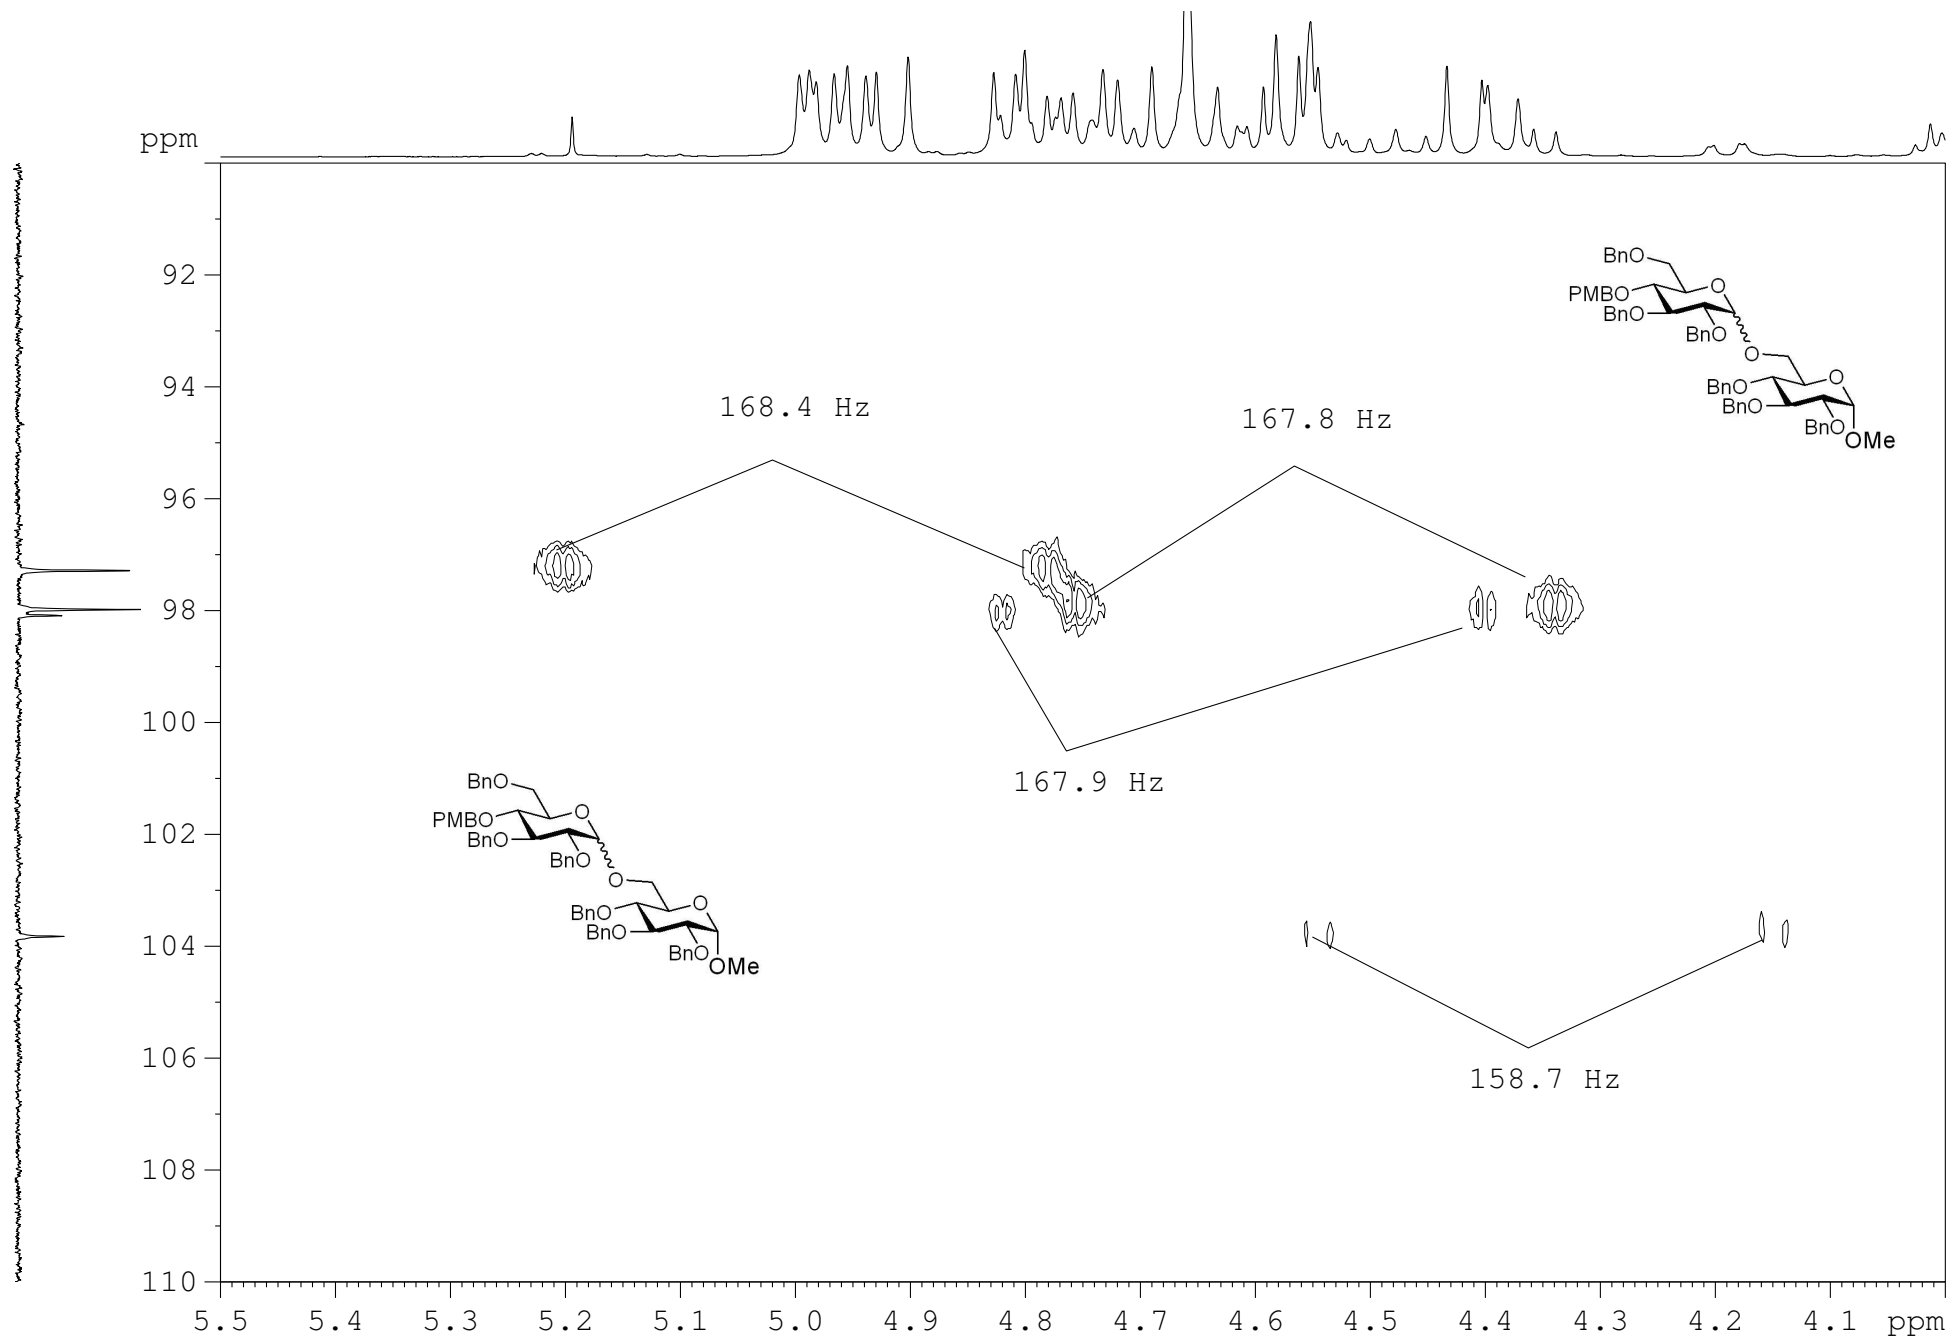

$^1\text{H-NMR}$ ,  $^{13}\text{C-APT}$ , HSQC, GATED of **24**

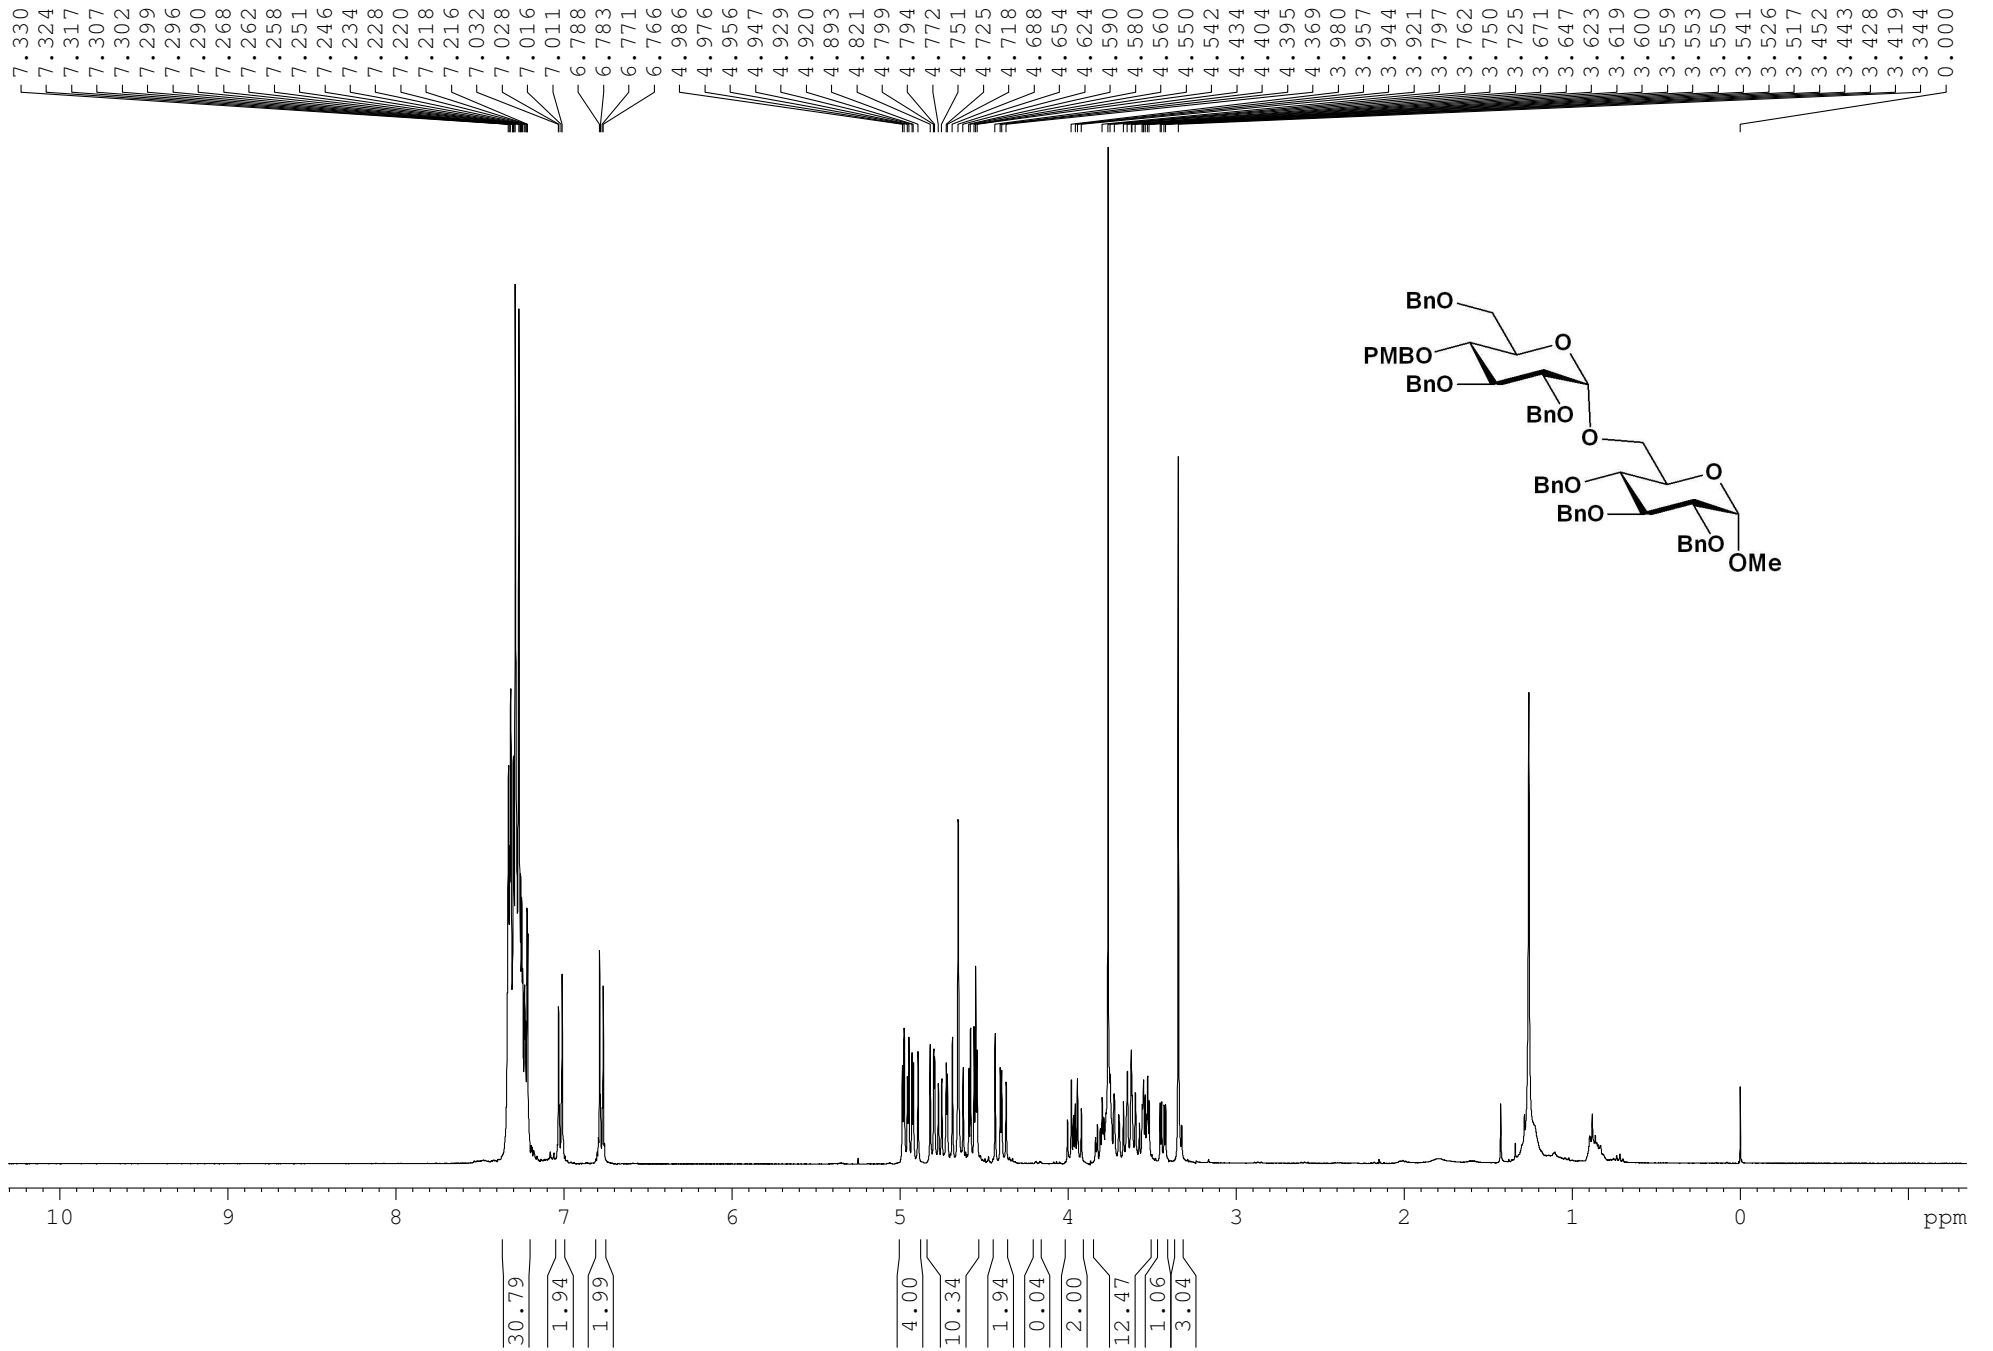

S107

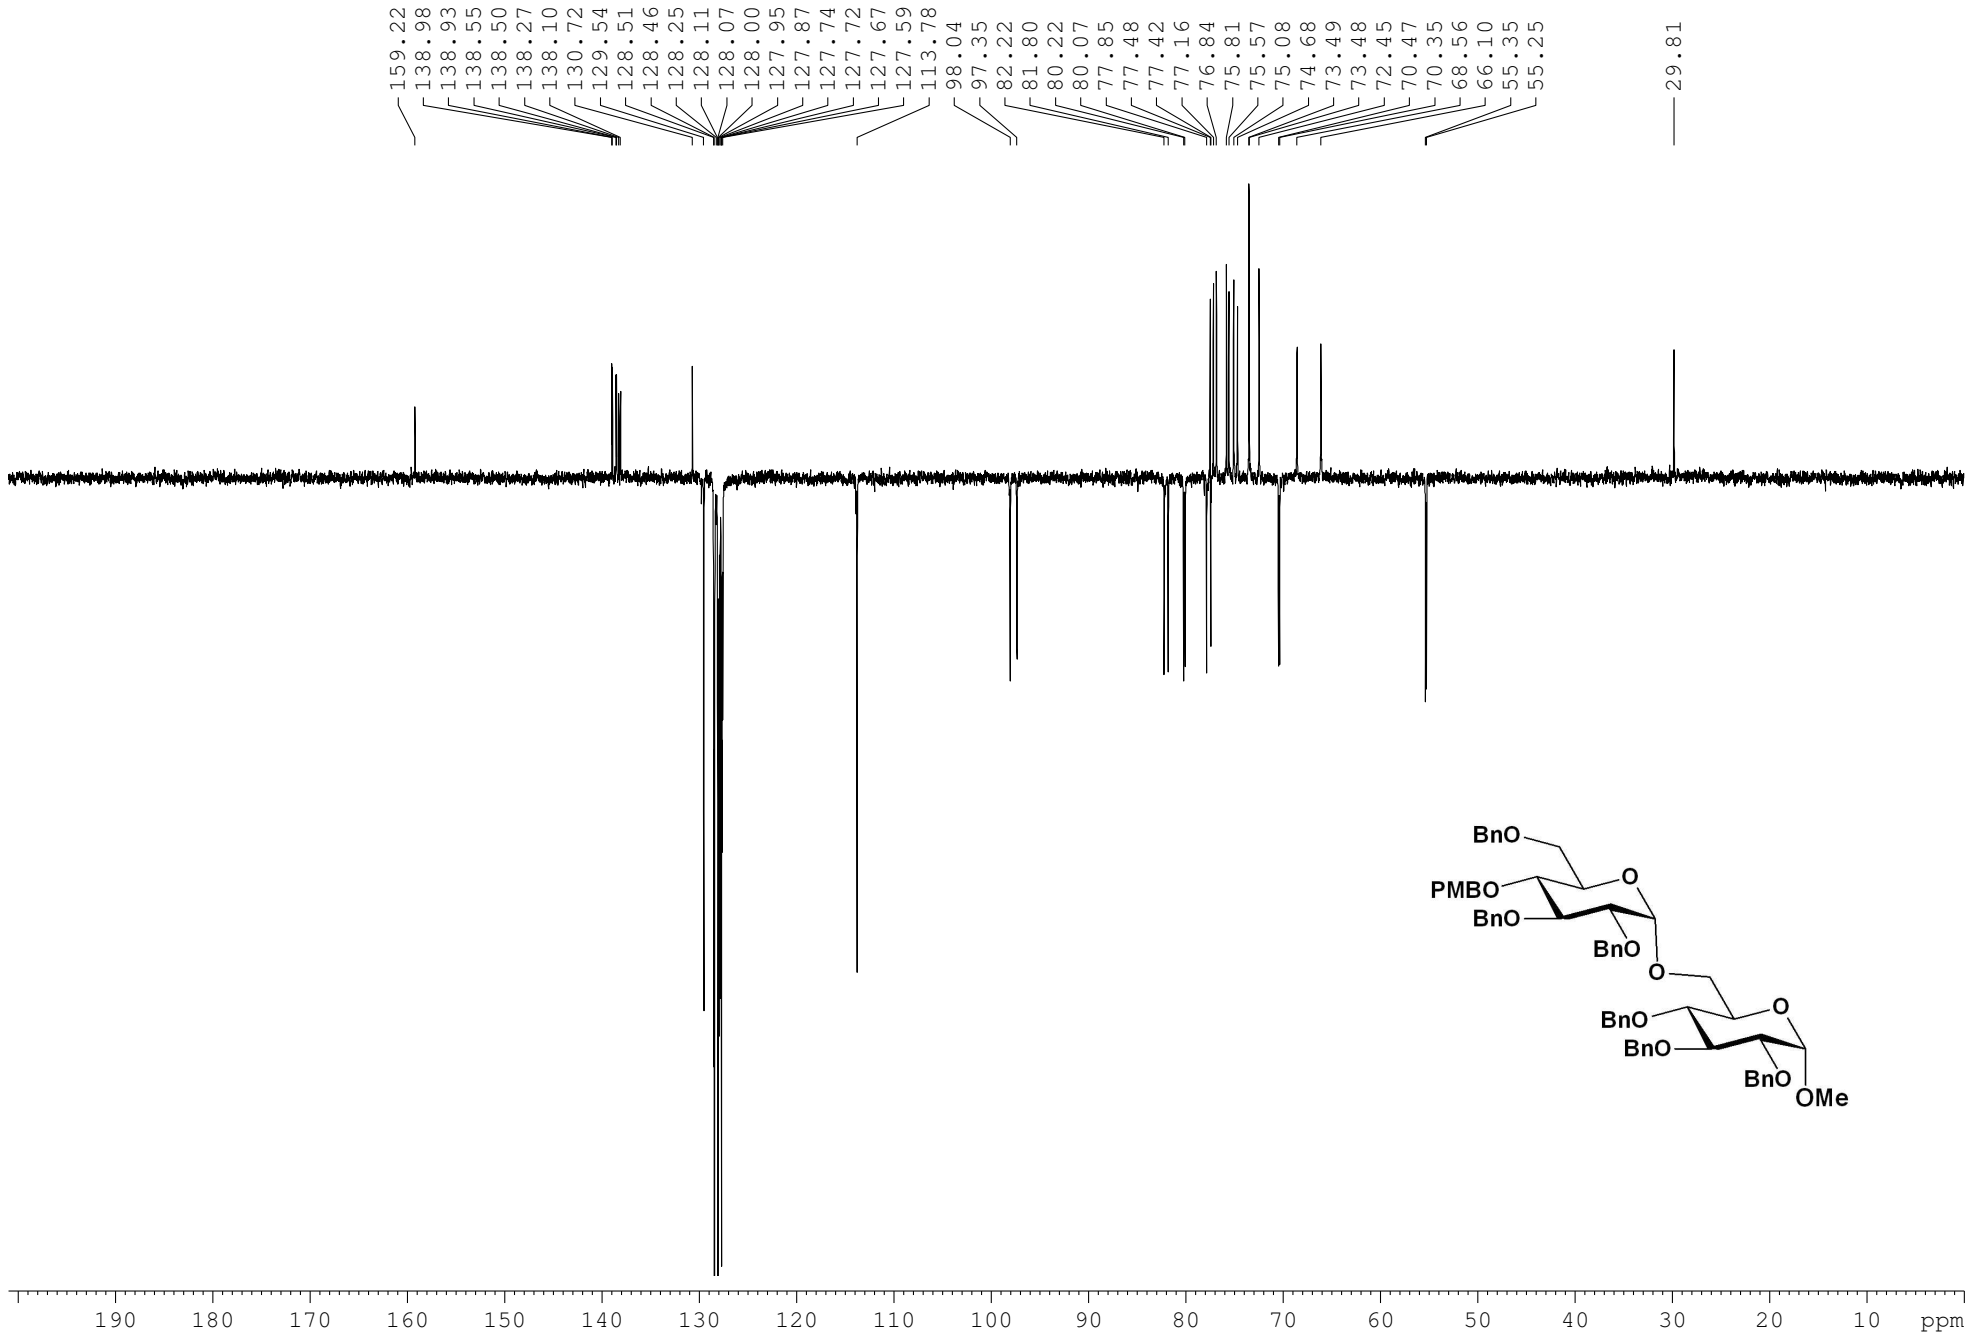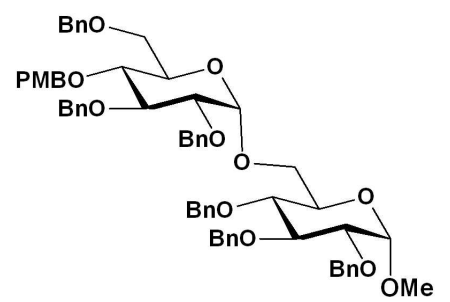



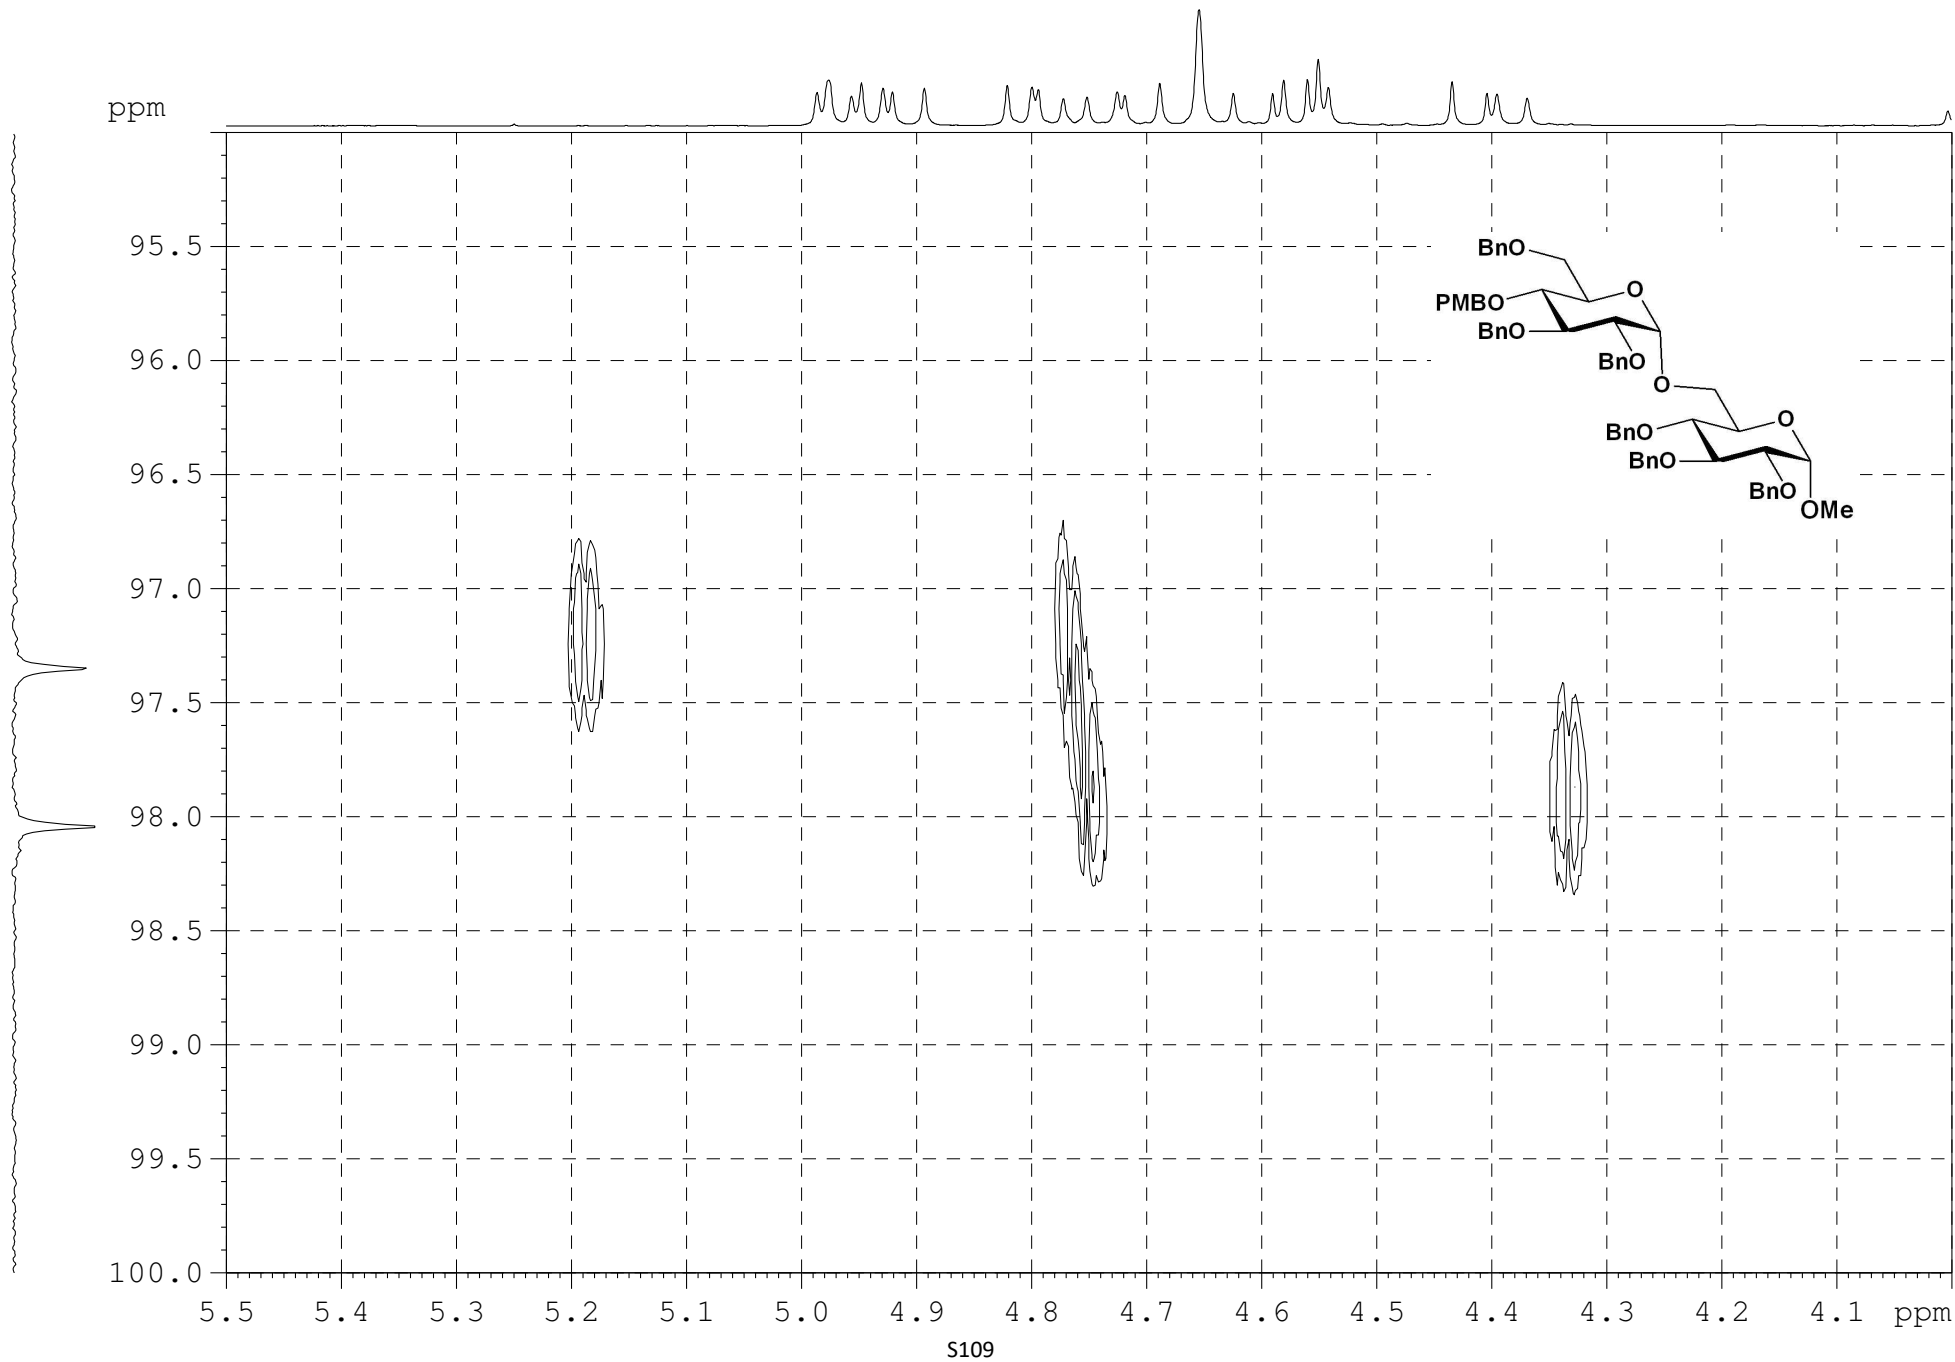

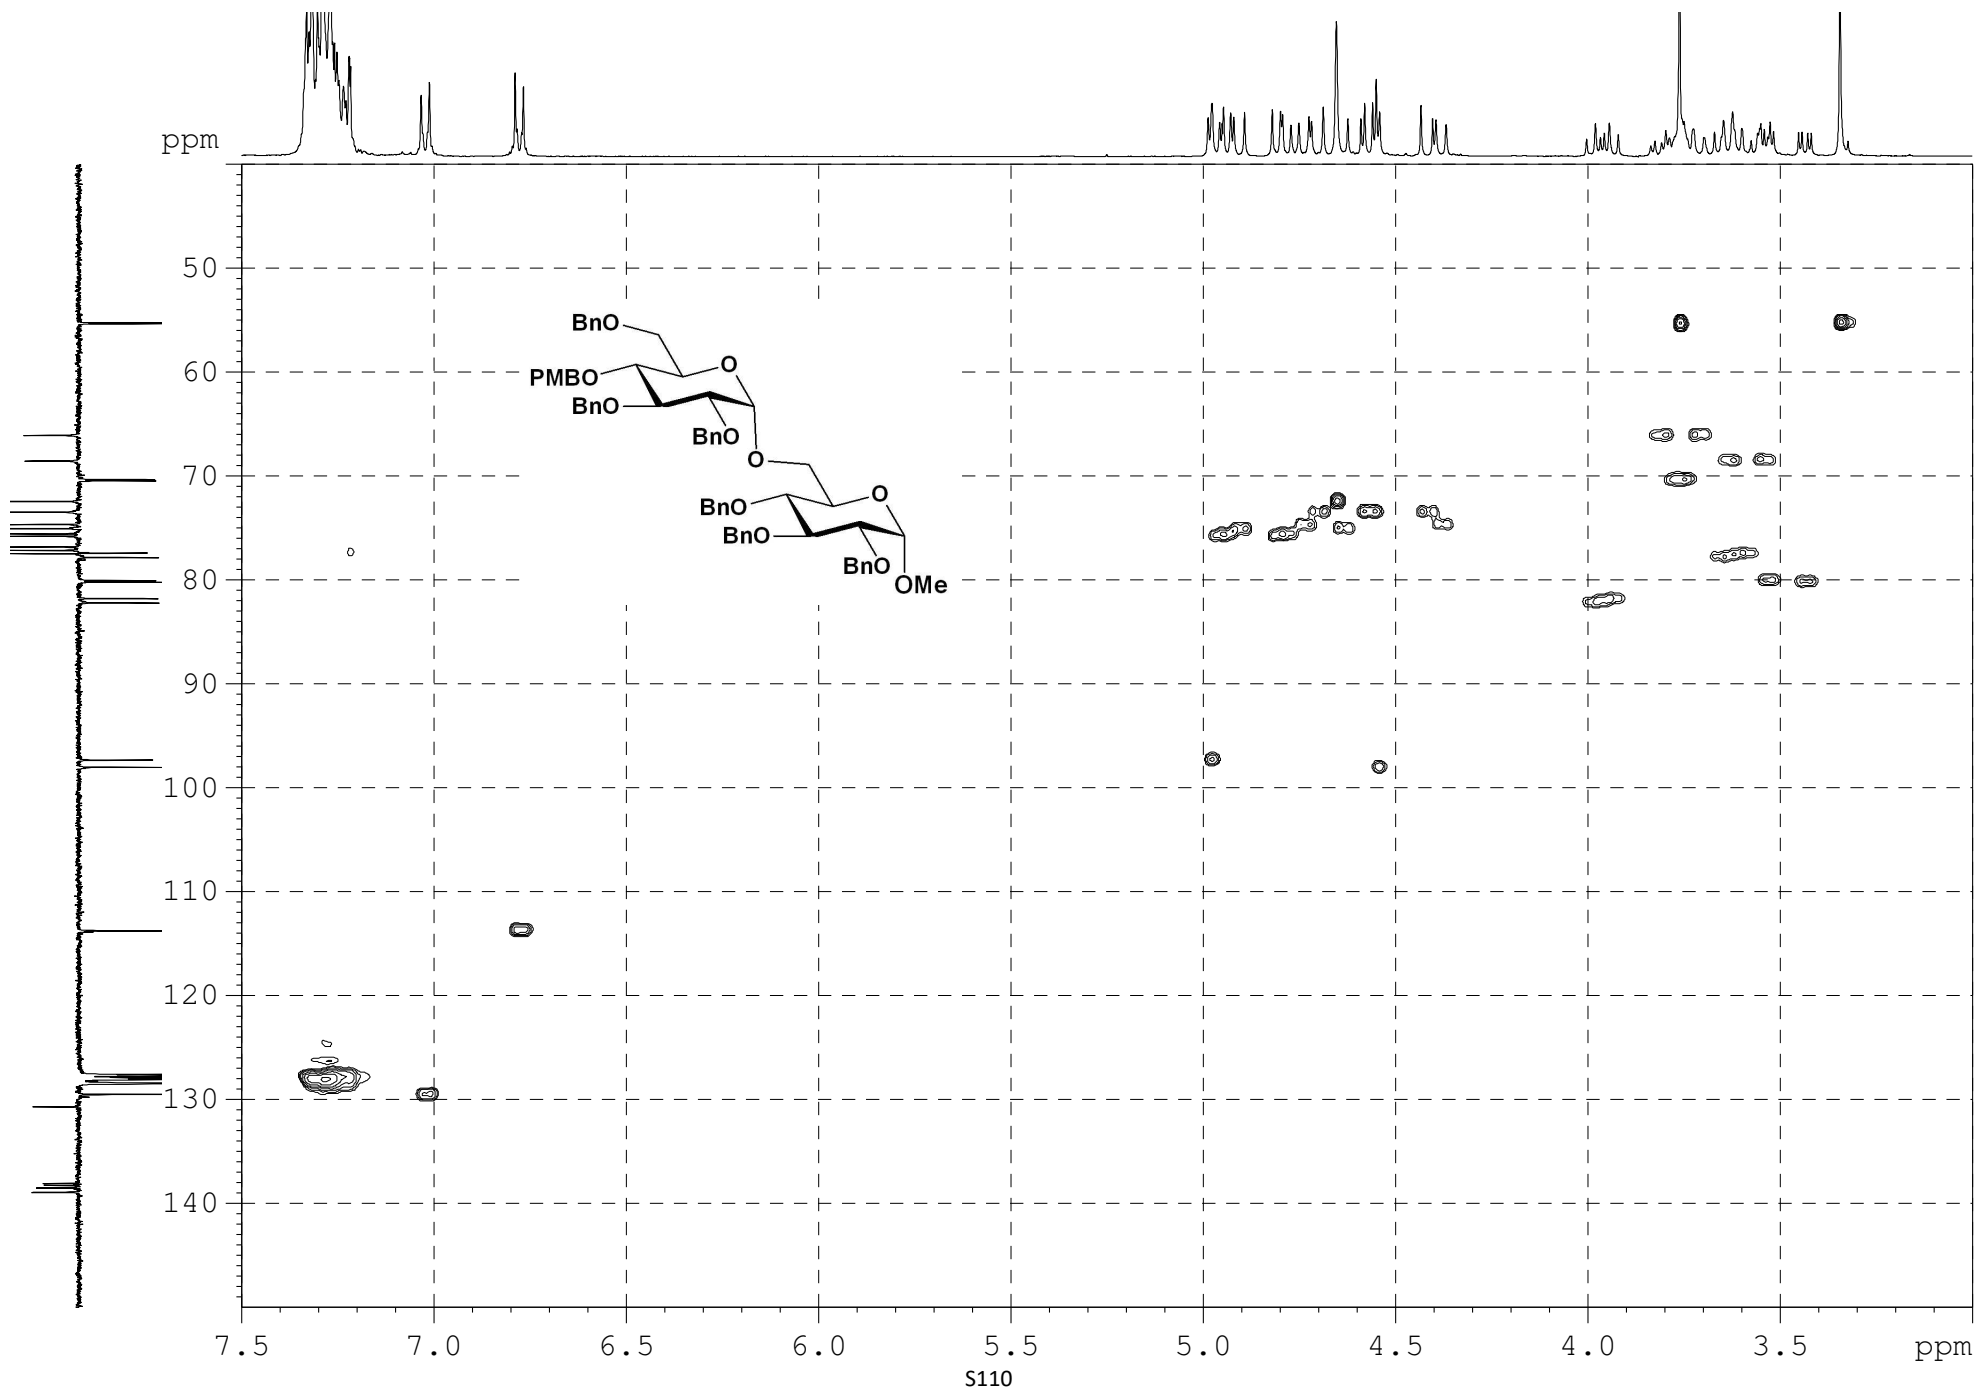

<sup>1</sup>H-NMR, <sup>13</sup>C-APT, <sup>1</sup>H-<sup>1</sup>H COSY, HSQC of 25

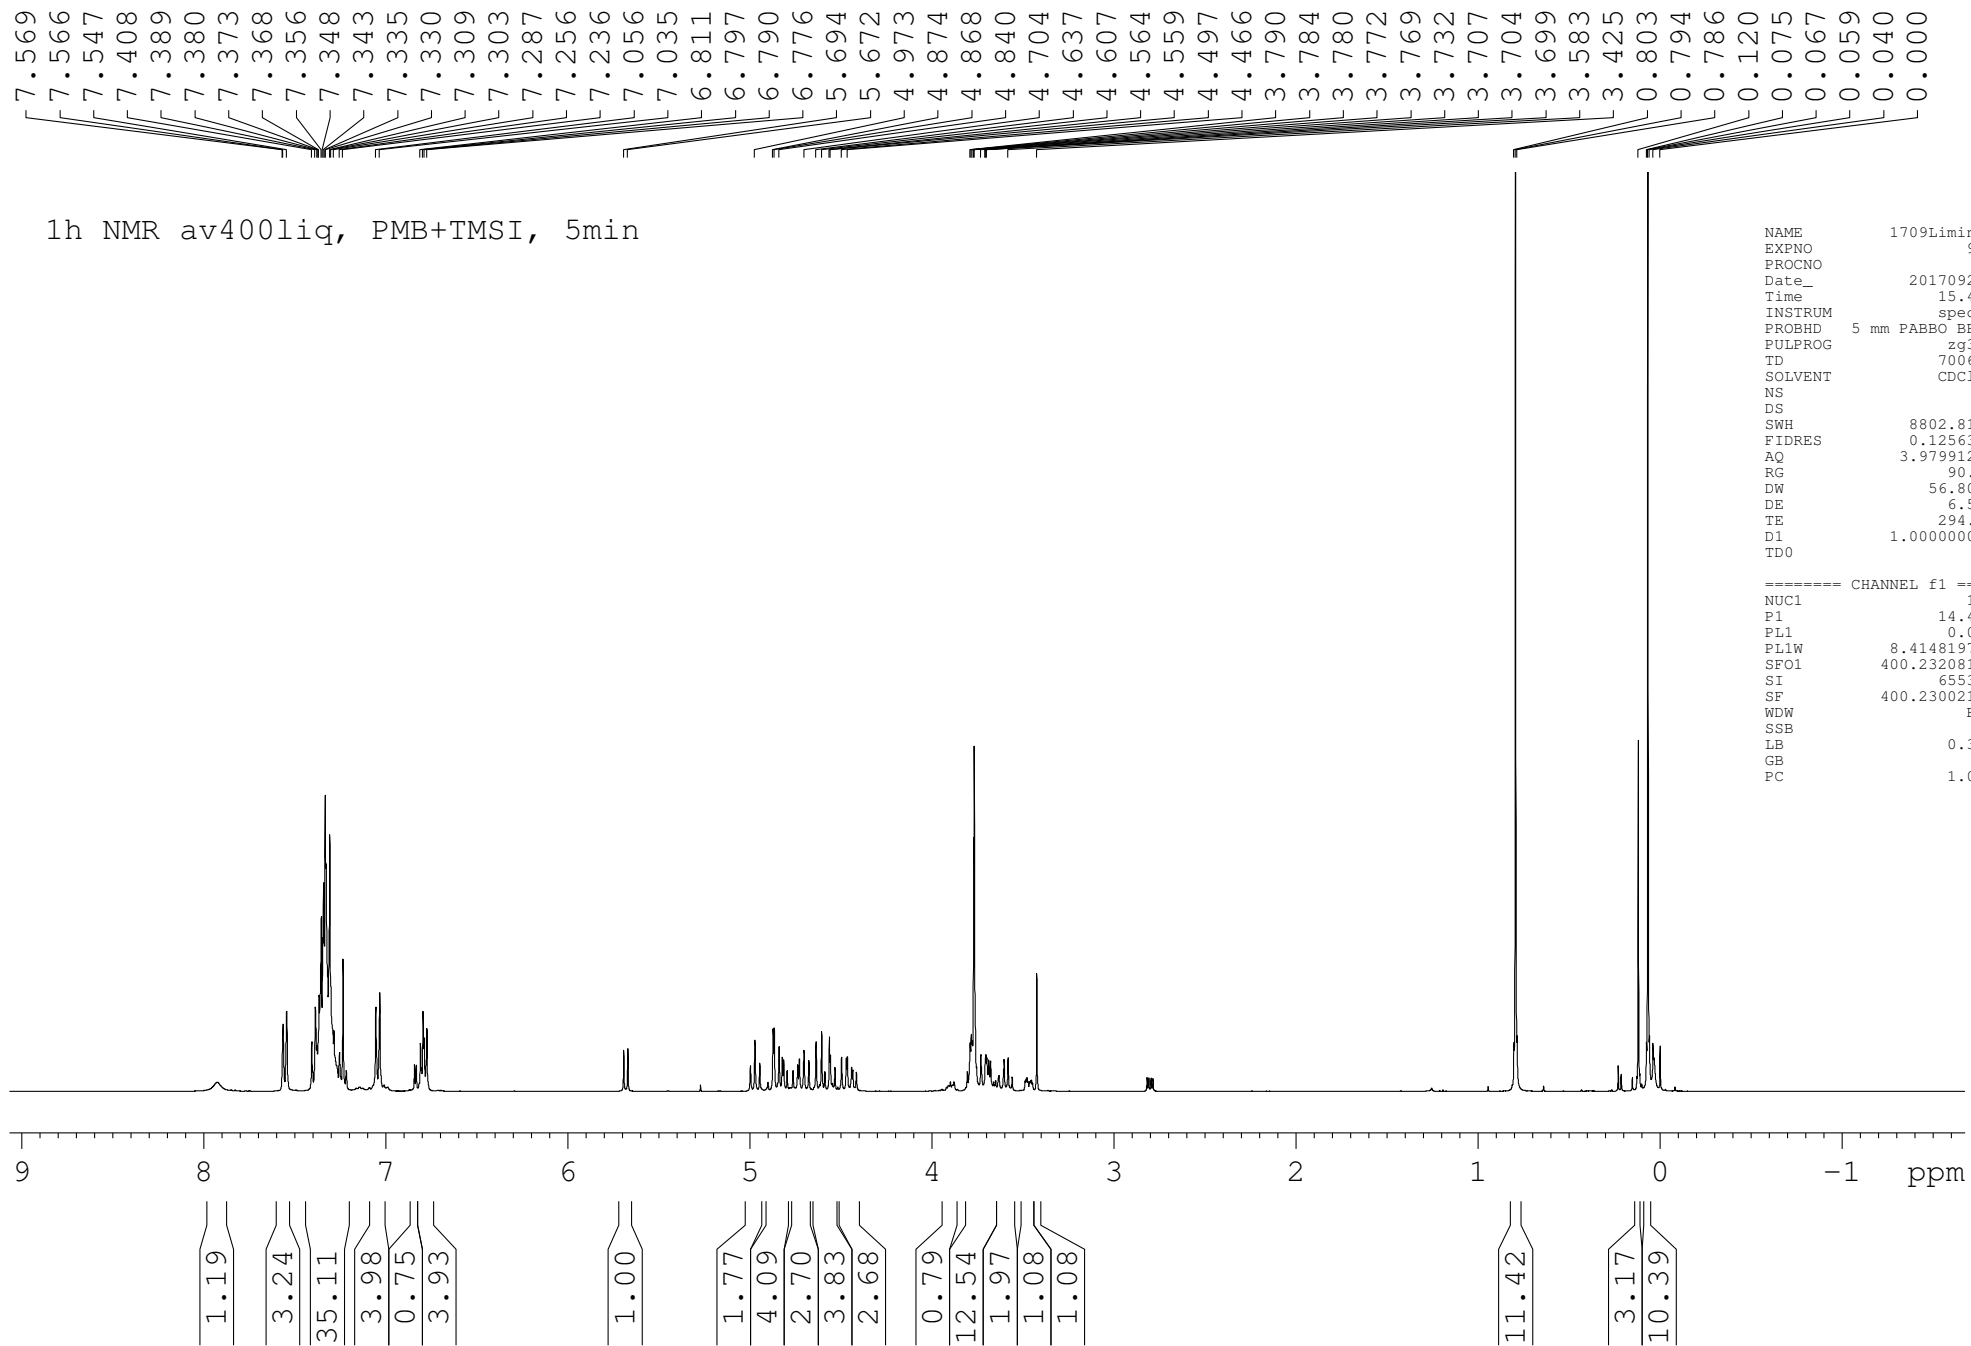

```

NAME          1709Liming
EXPNO         96
PROCNO        1
Date_         20170924
Time         15.49
INSTRUM       spect
PROBHD        5 mm PABBO BB-
PULPROG       zg30
TD            70068
SOLVENT       CDC13
NS            6
DS            0
SWH           8802.817
FIDRES        0.125632
AQ            3.9799123
RG            90.5
DW            56.800
DE            6.50
TE            294.3
D1            1.00000000
TD0           1
    
```

```

===== CHANNEL f1 =====
NUC1          1H
P1            14.40
PL1           0.00
PL1W          8.41481972
SF01          400.2320812
SI            65536
SF            400.2300216
WDW           EM
SSB           0
LB            0.30
GB            0
PC            1.00
    
```



1H Cosy av400liq

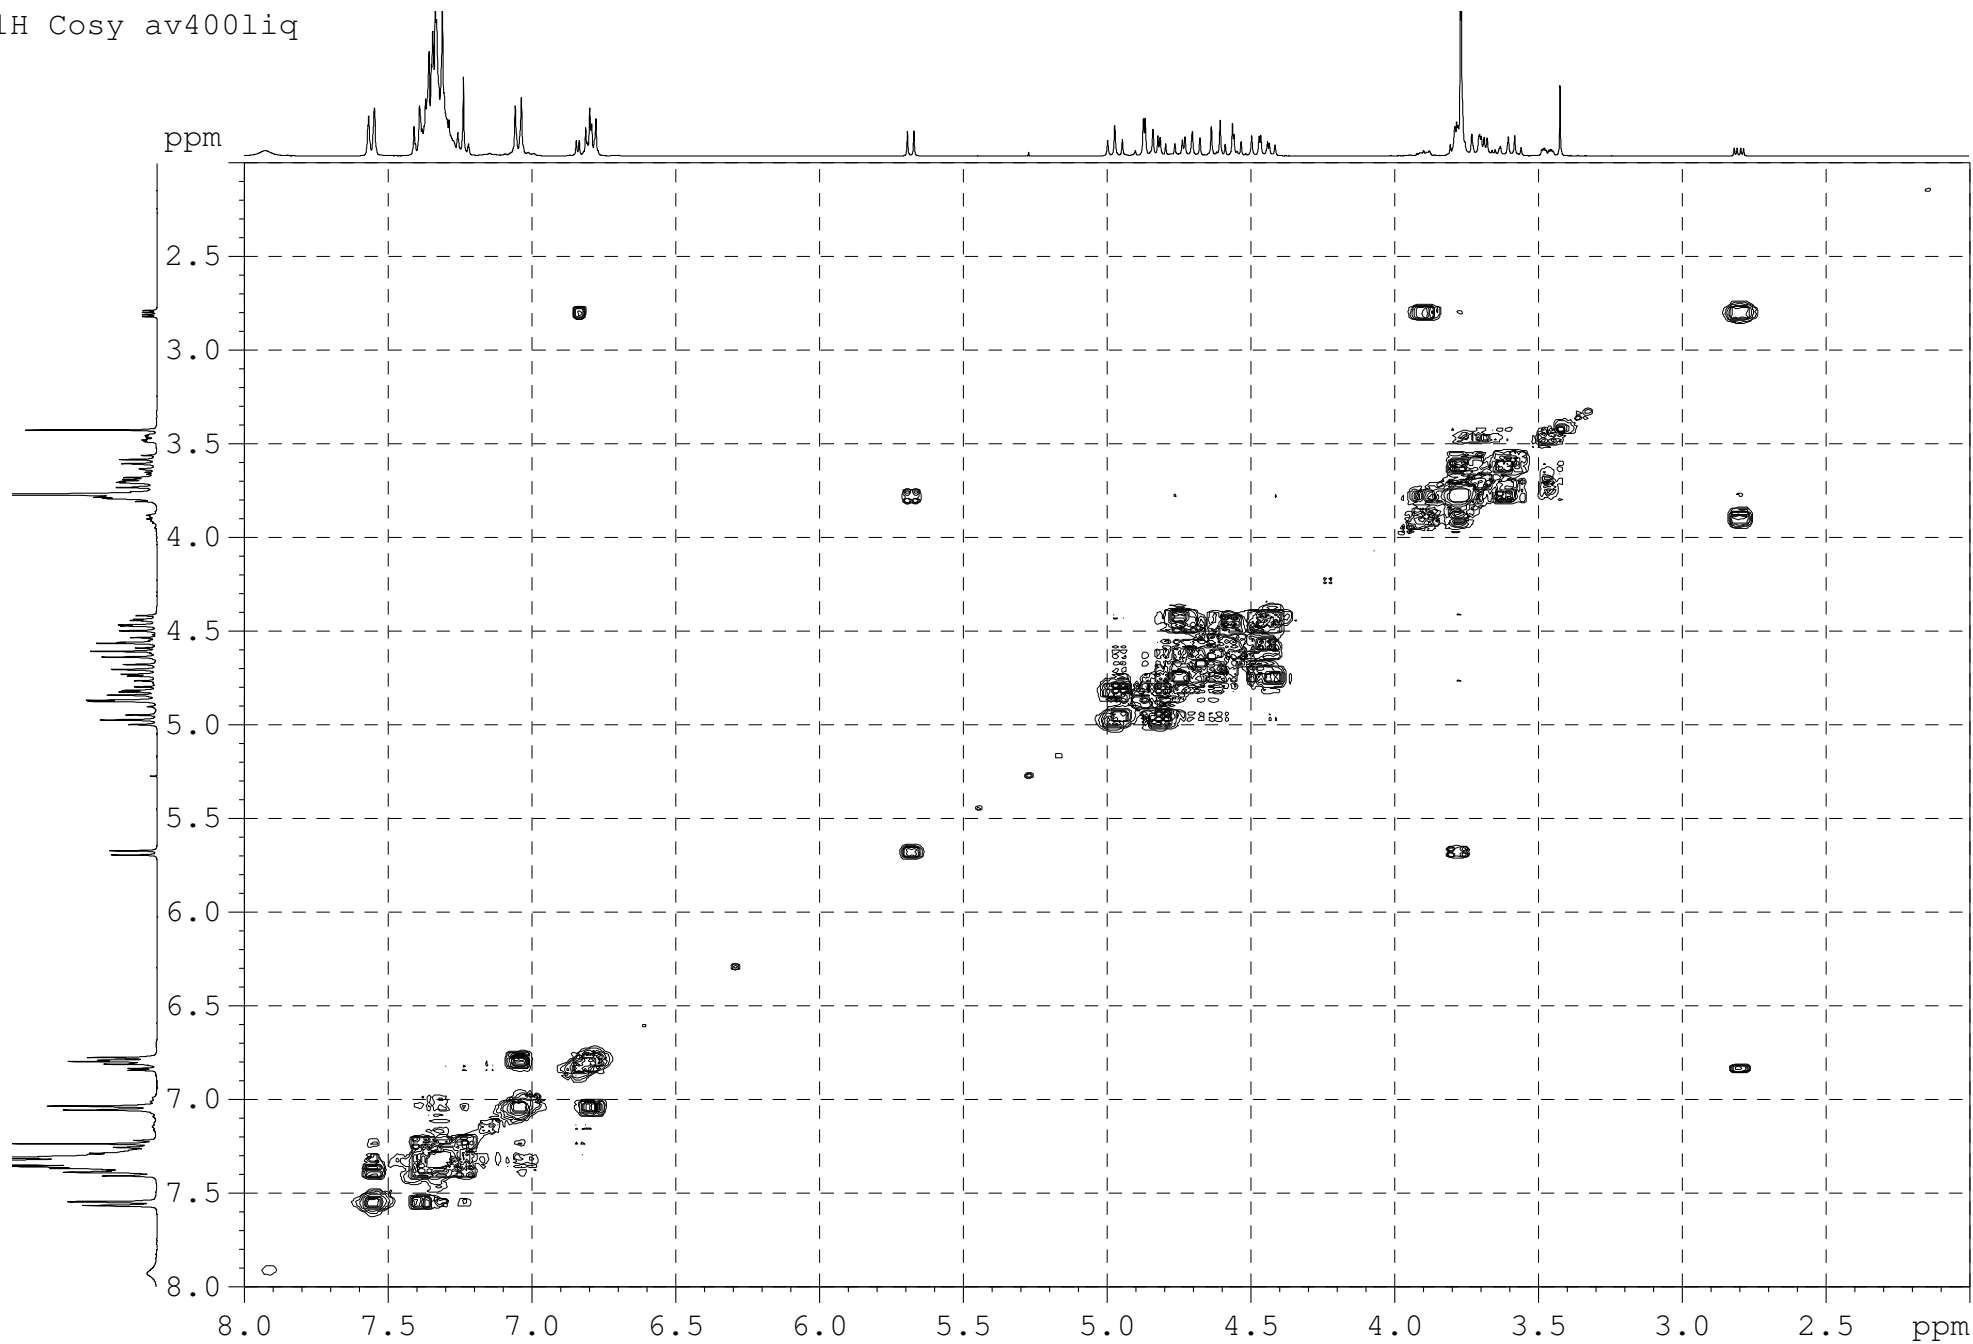

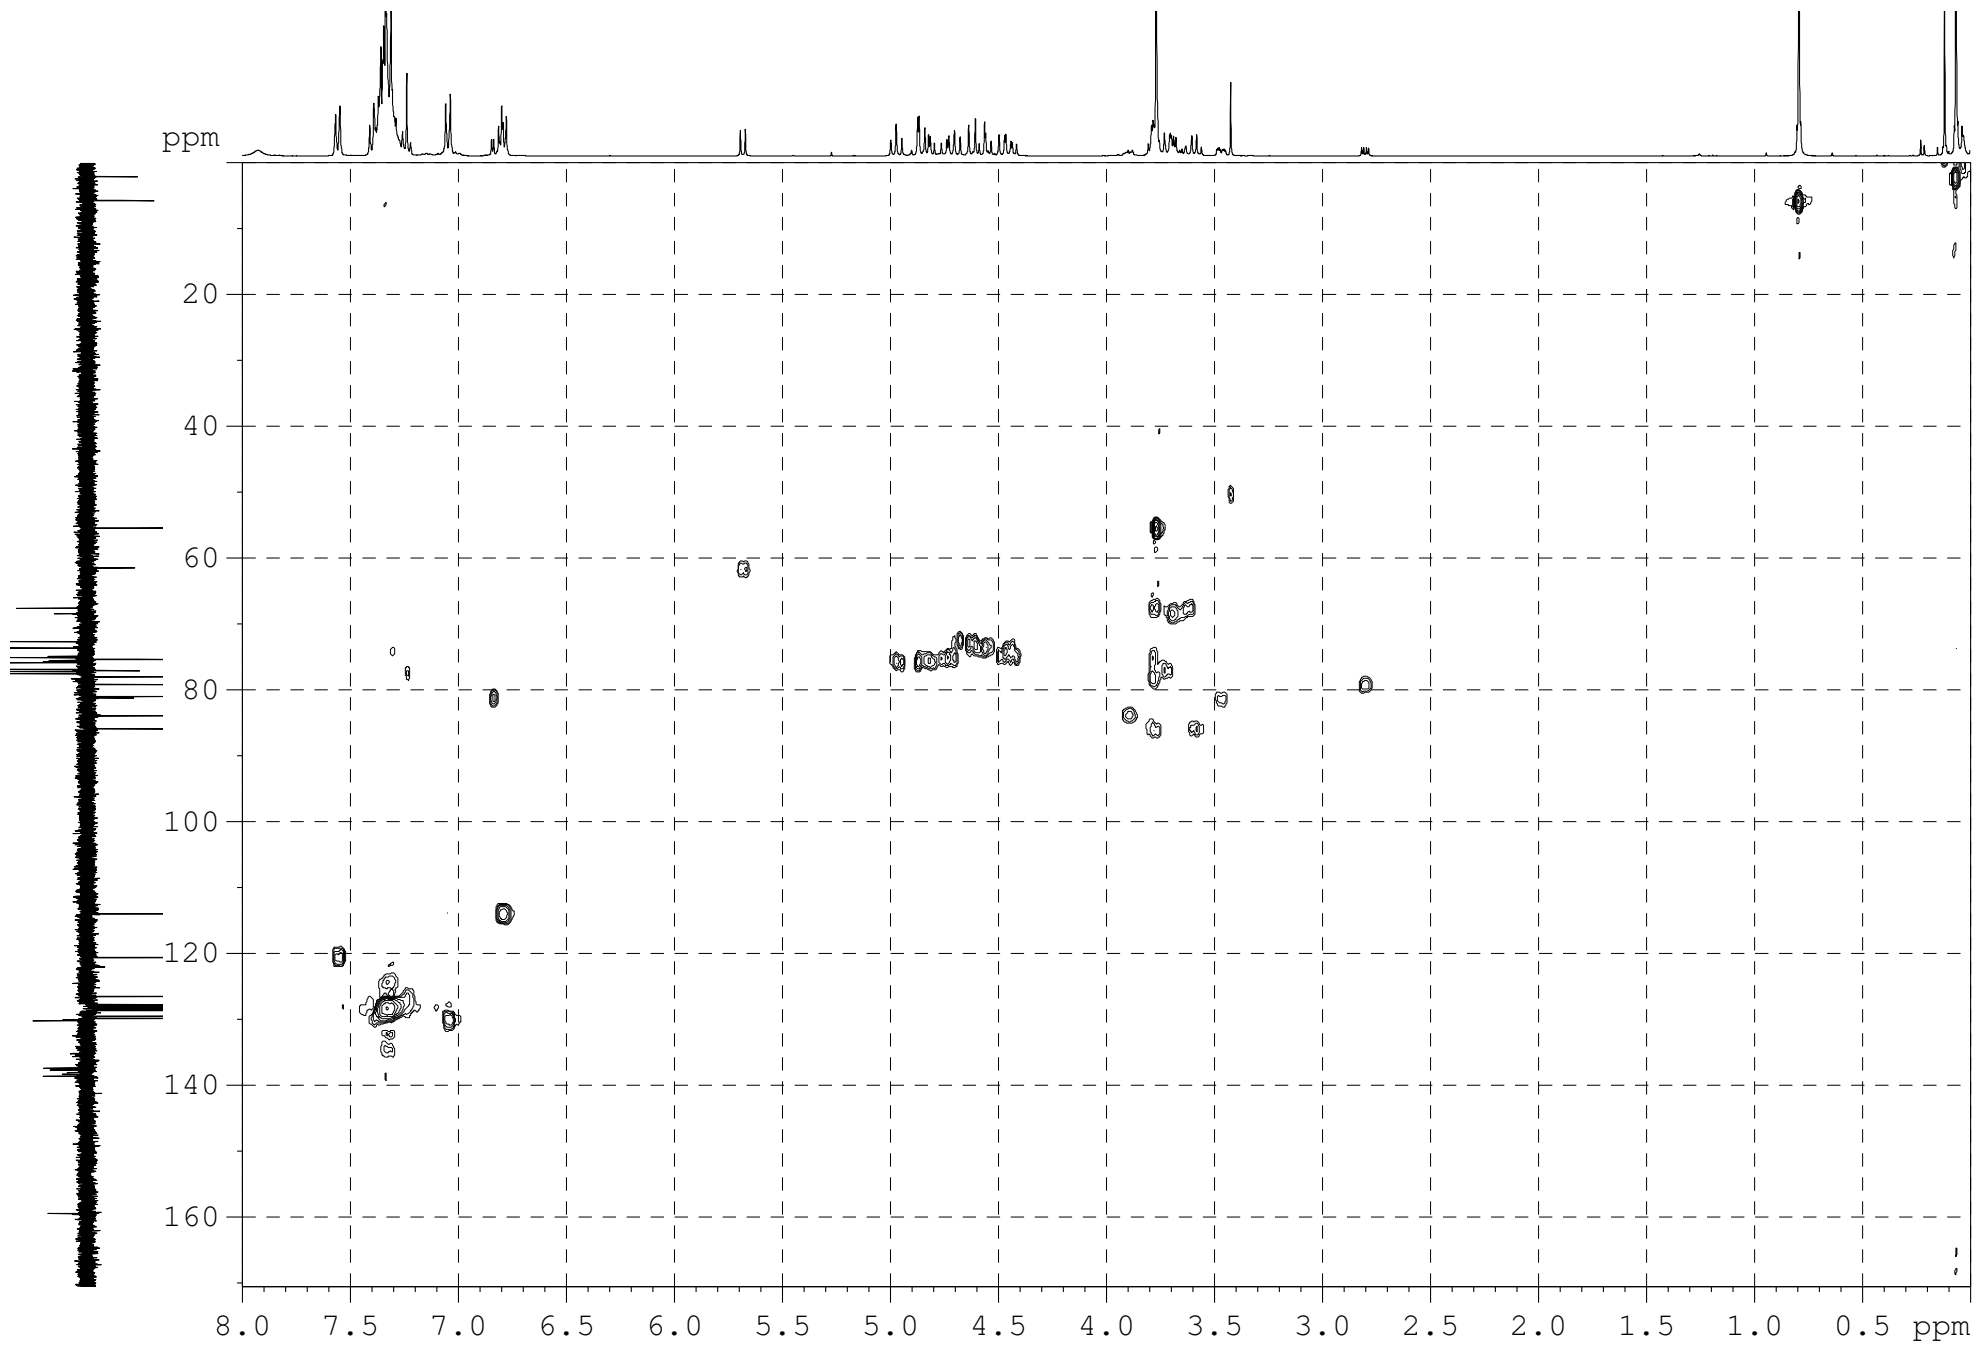

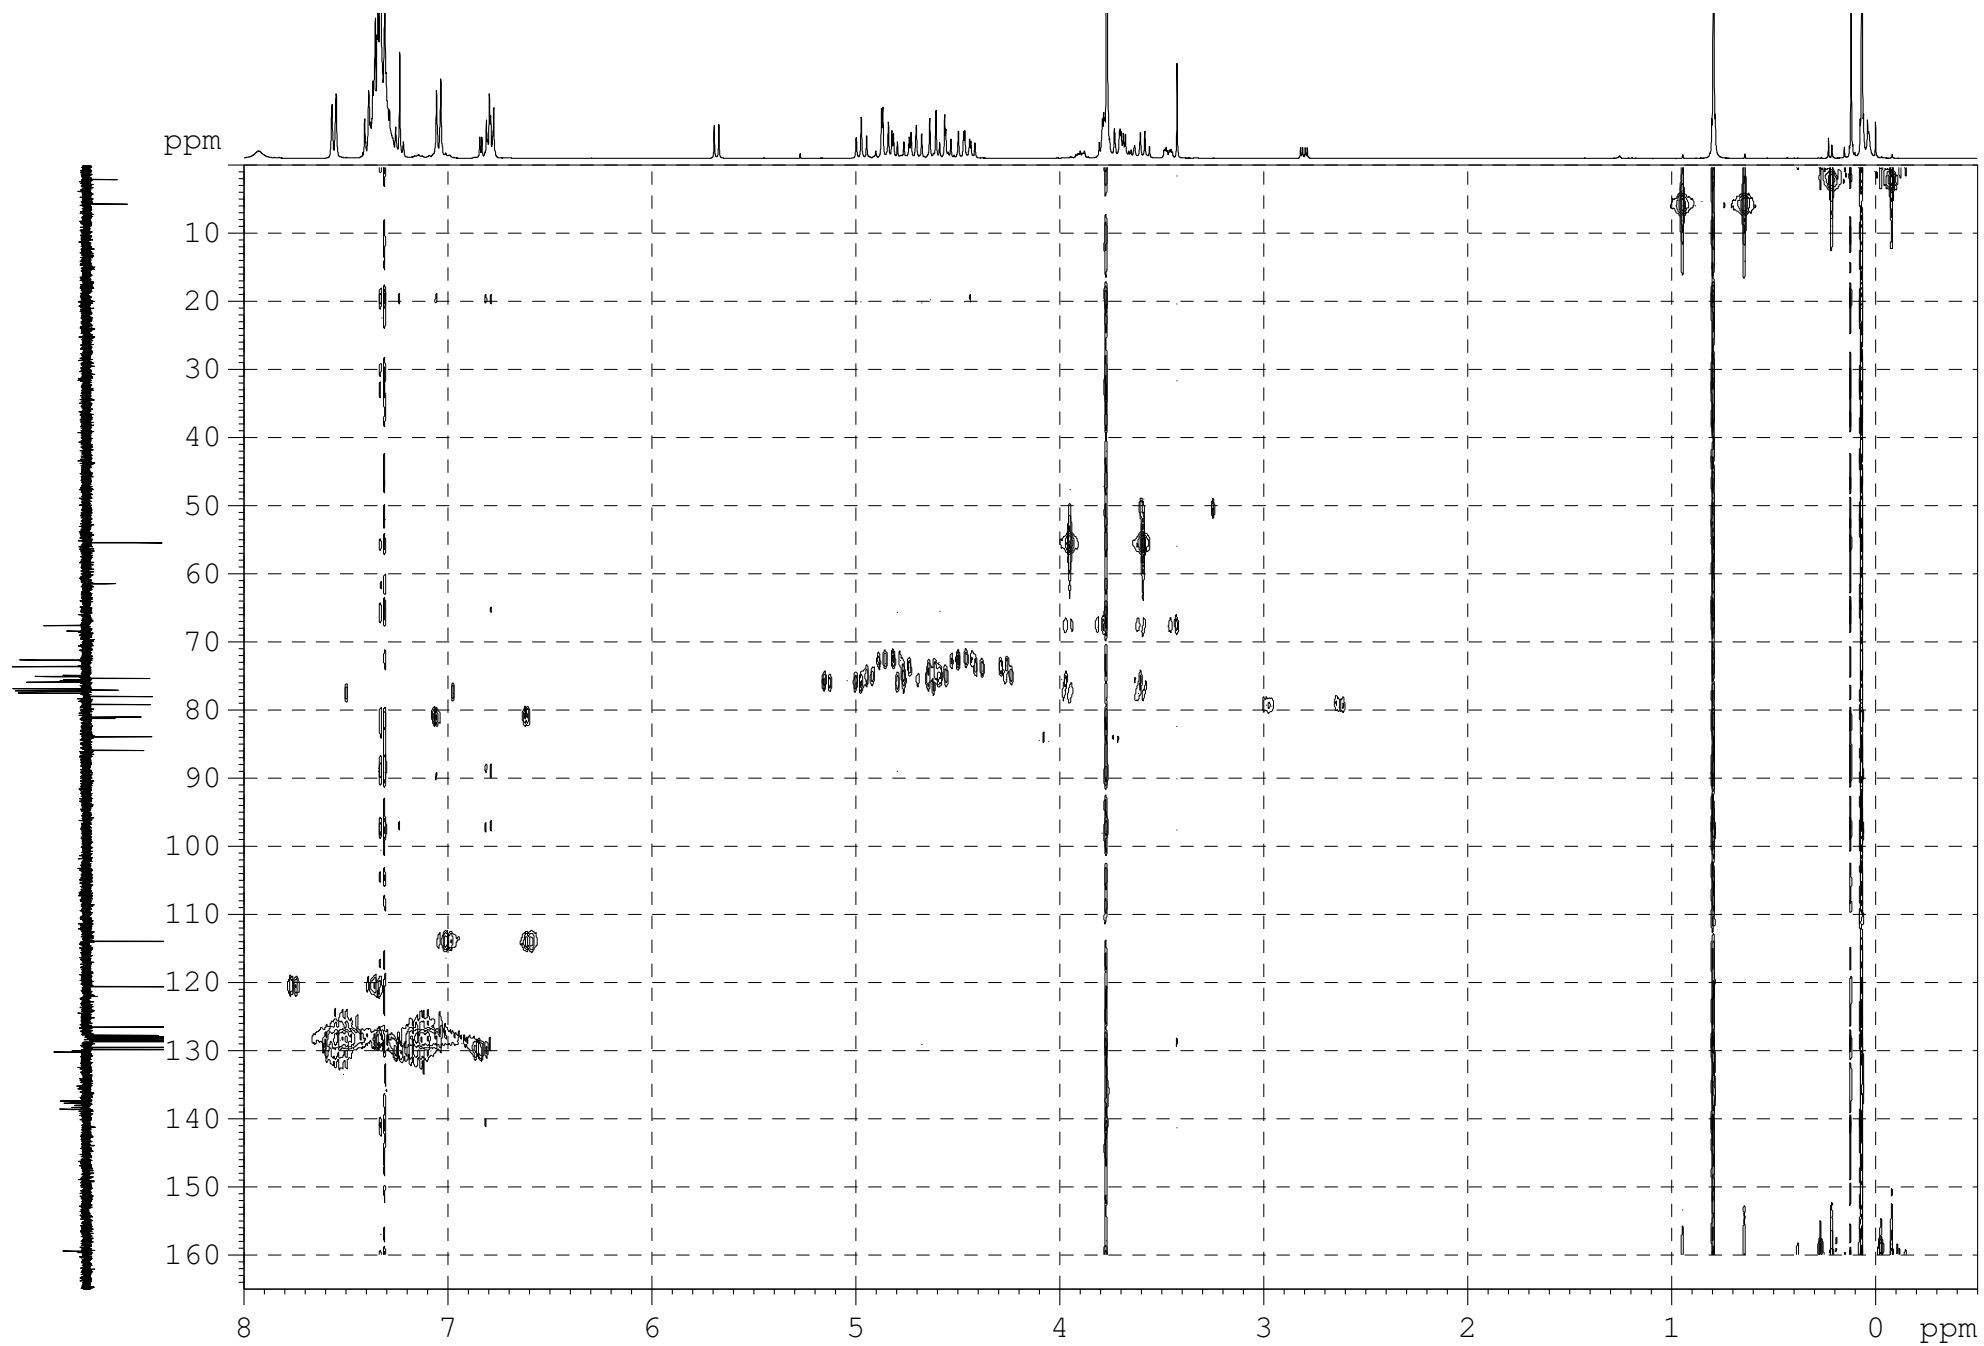

<sup>1</sup>H-NMR, <sup>13</sup>C-APT, <sup>1</sup>H-<sup>1</sup>H COSY, HSQC, HMBC, GATED of 26

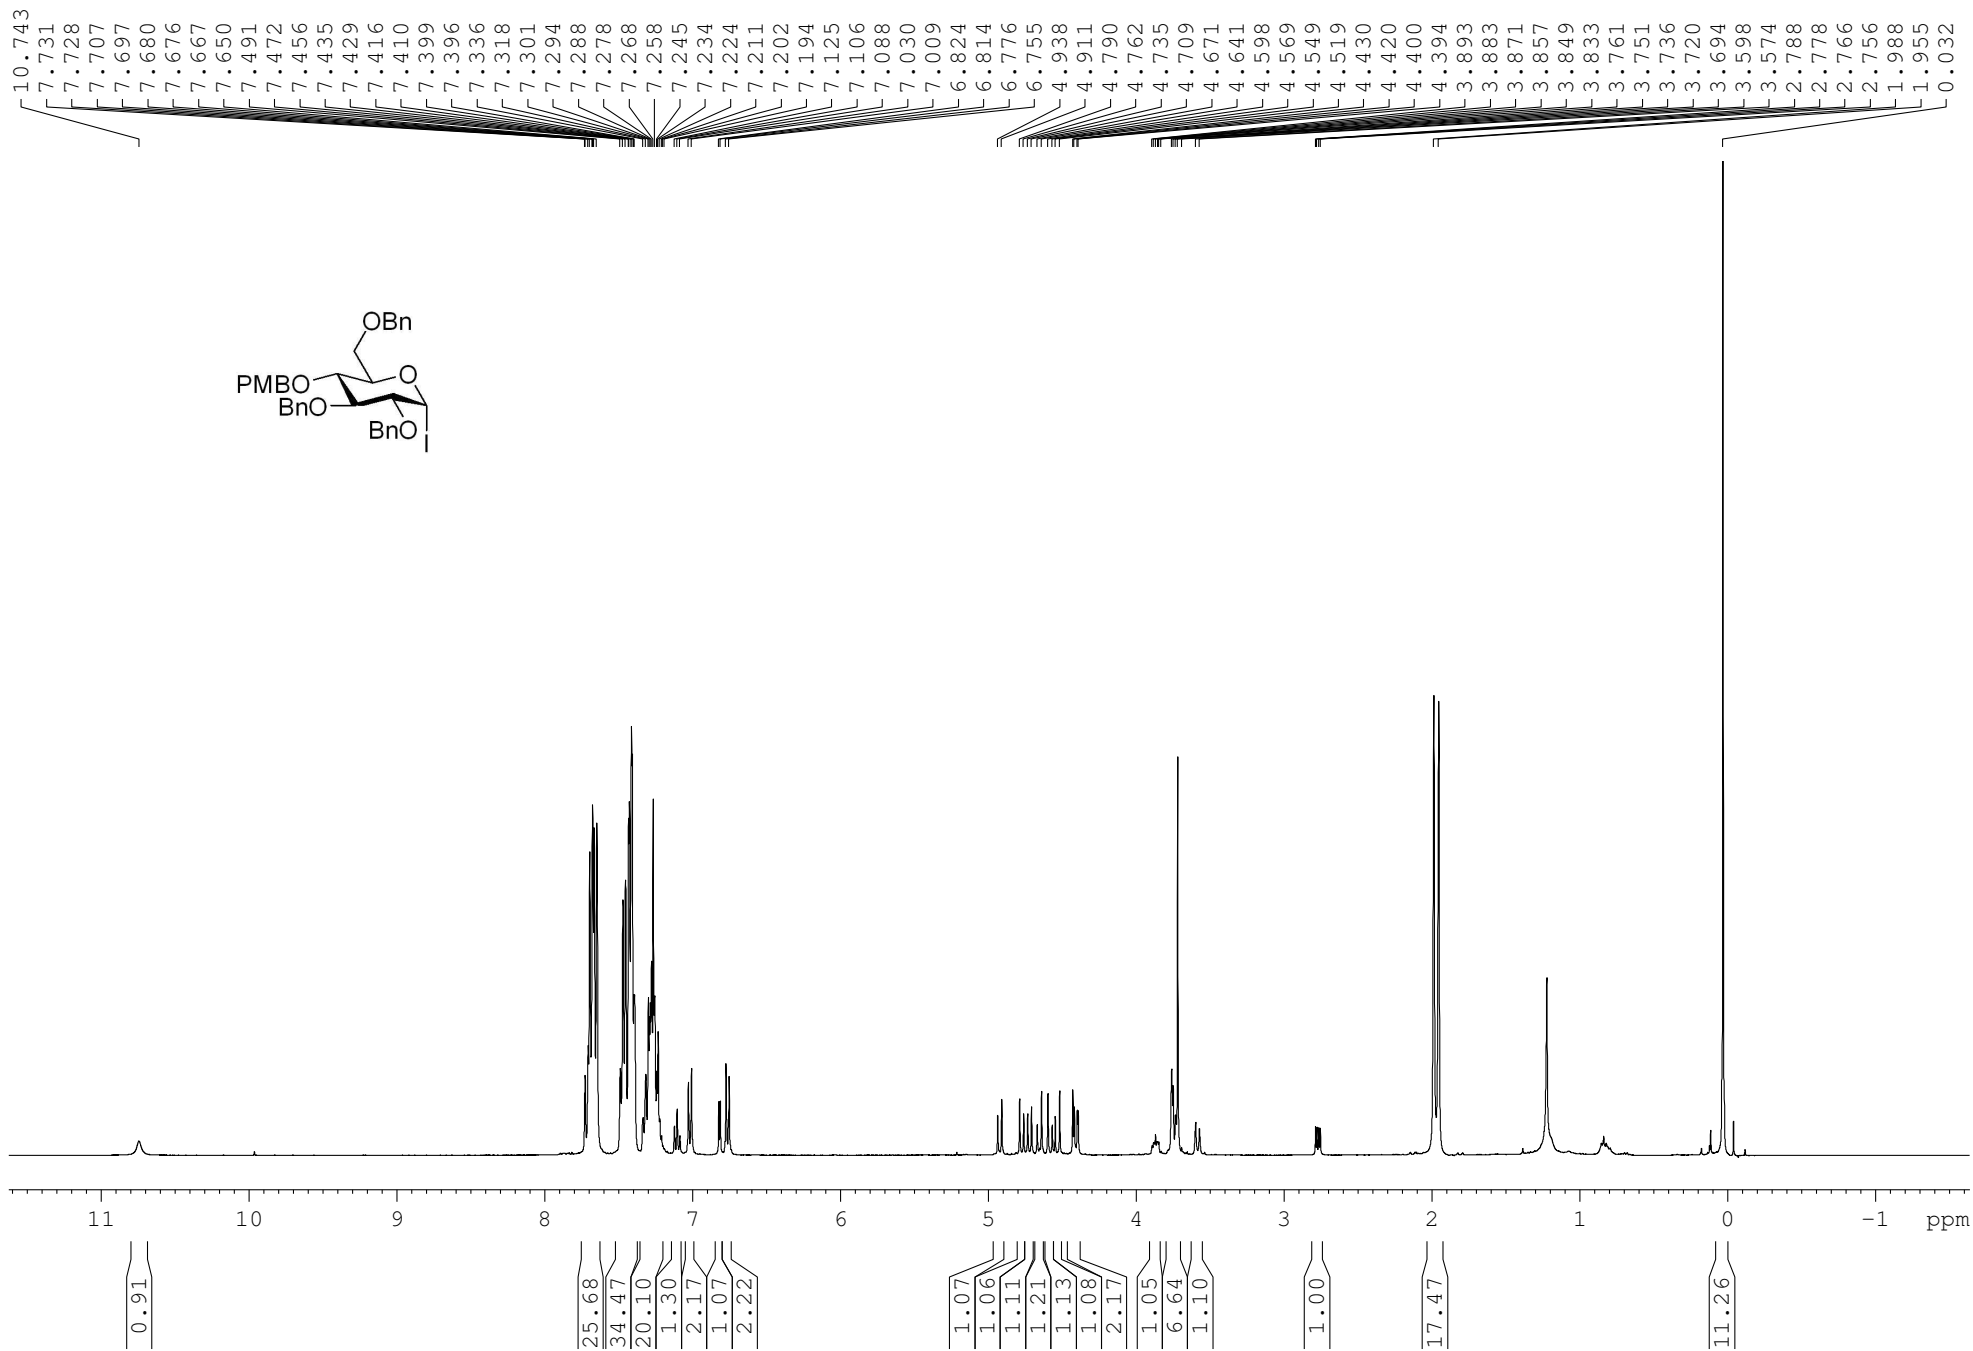



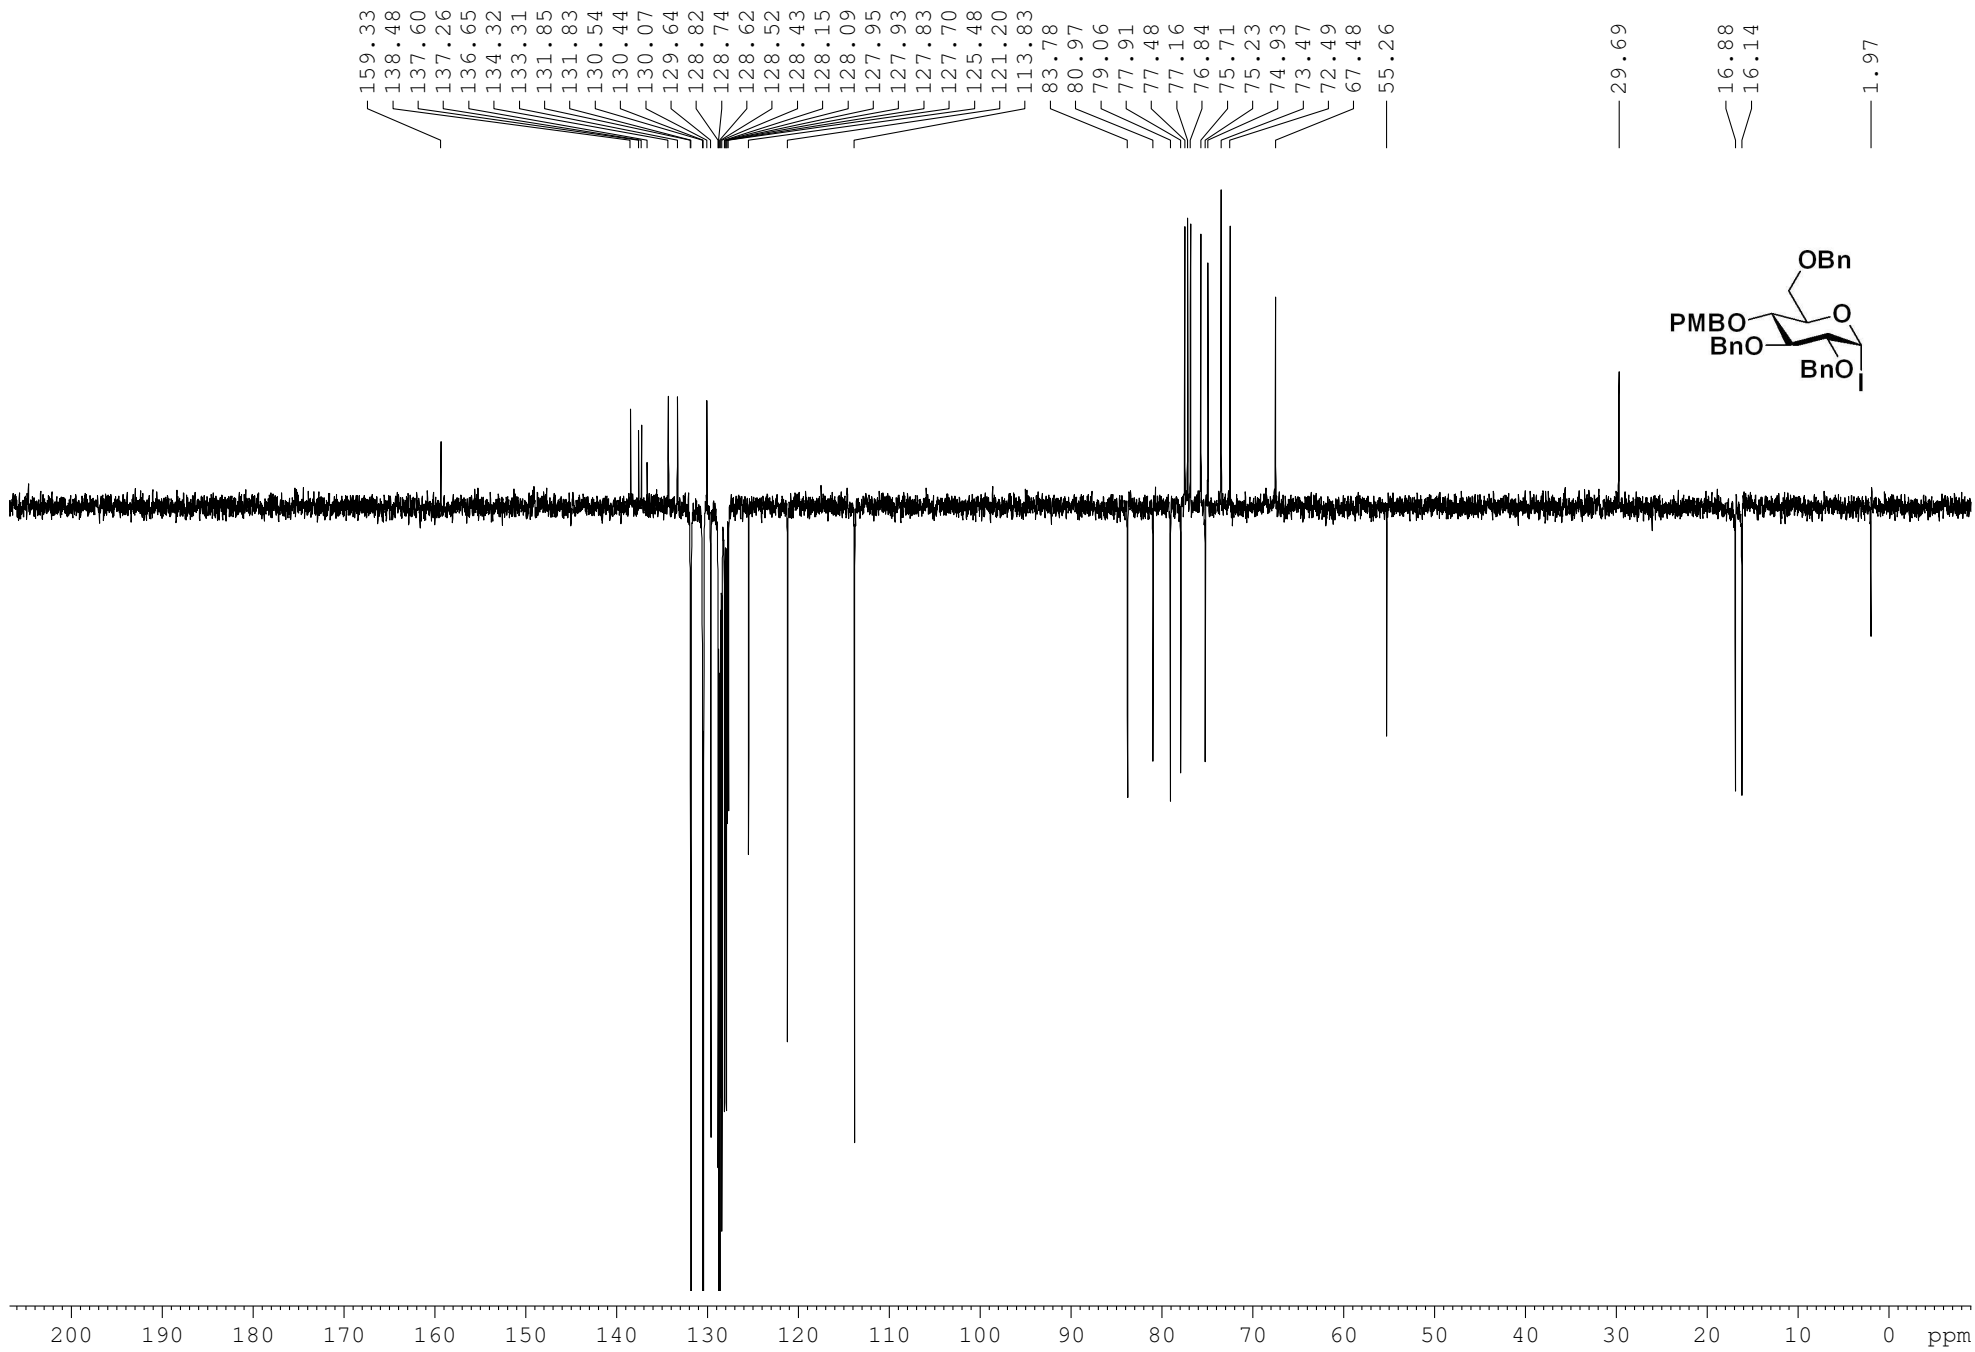

S117

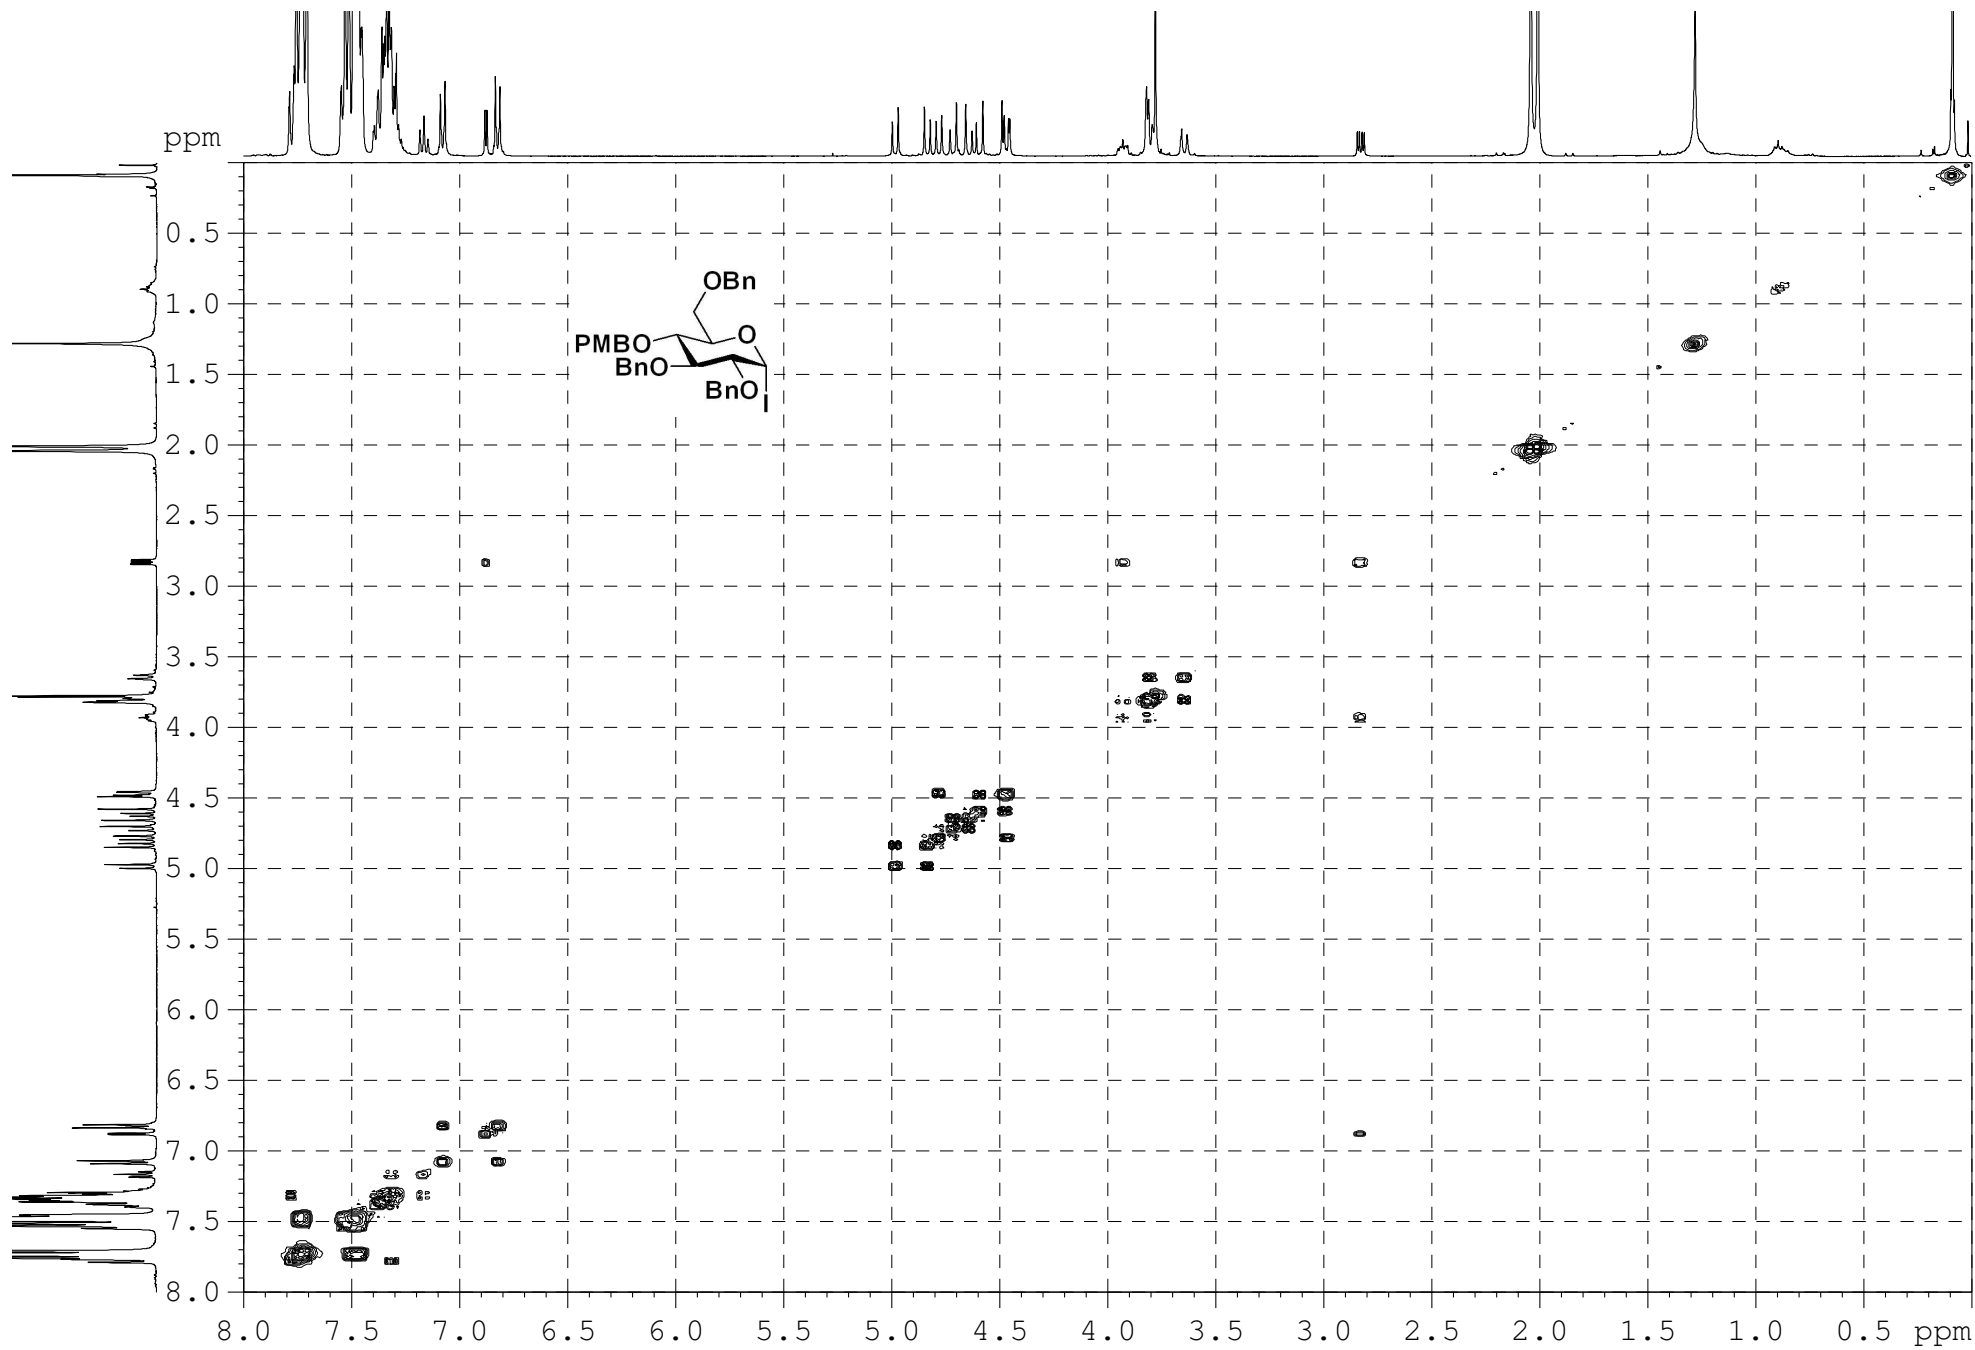



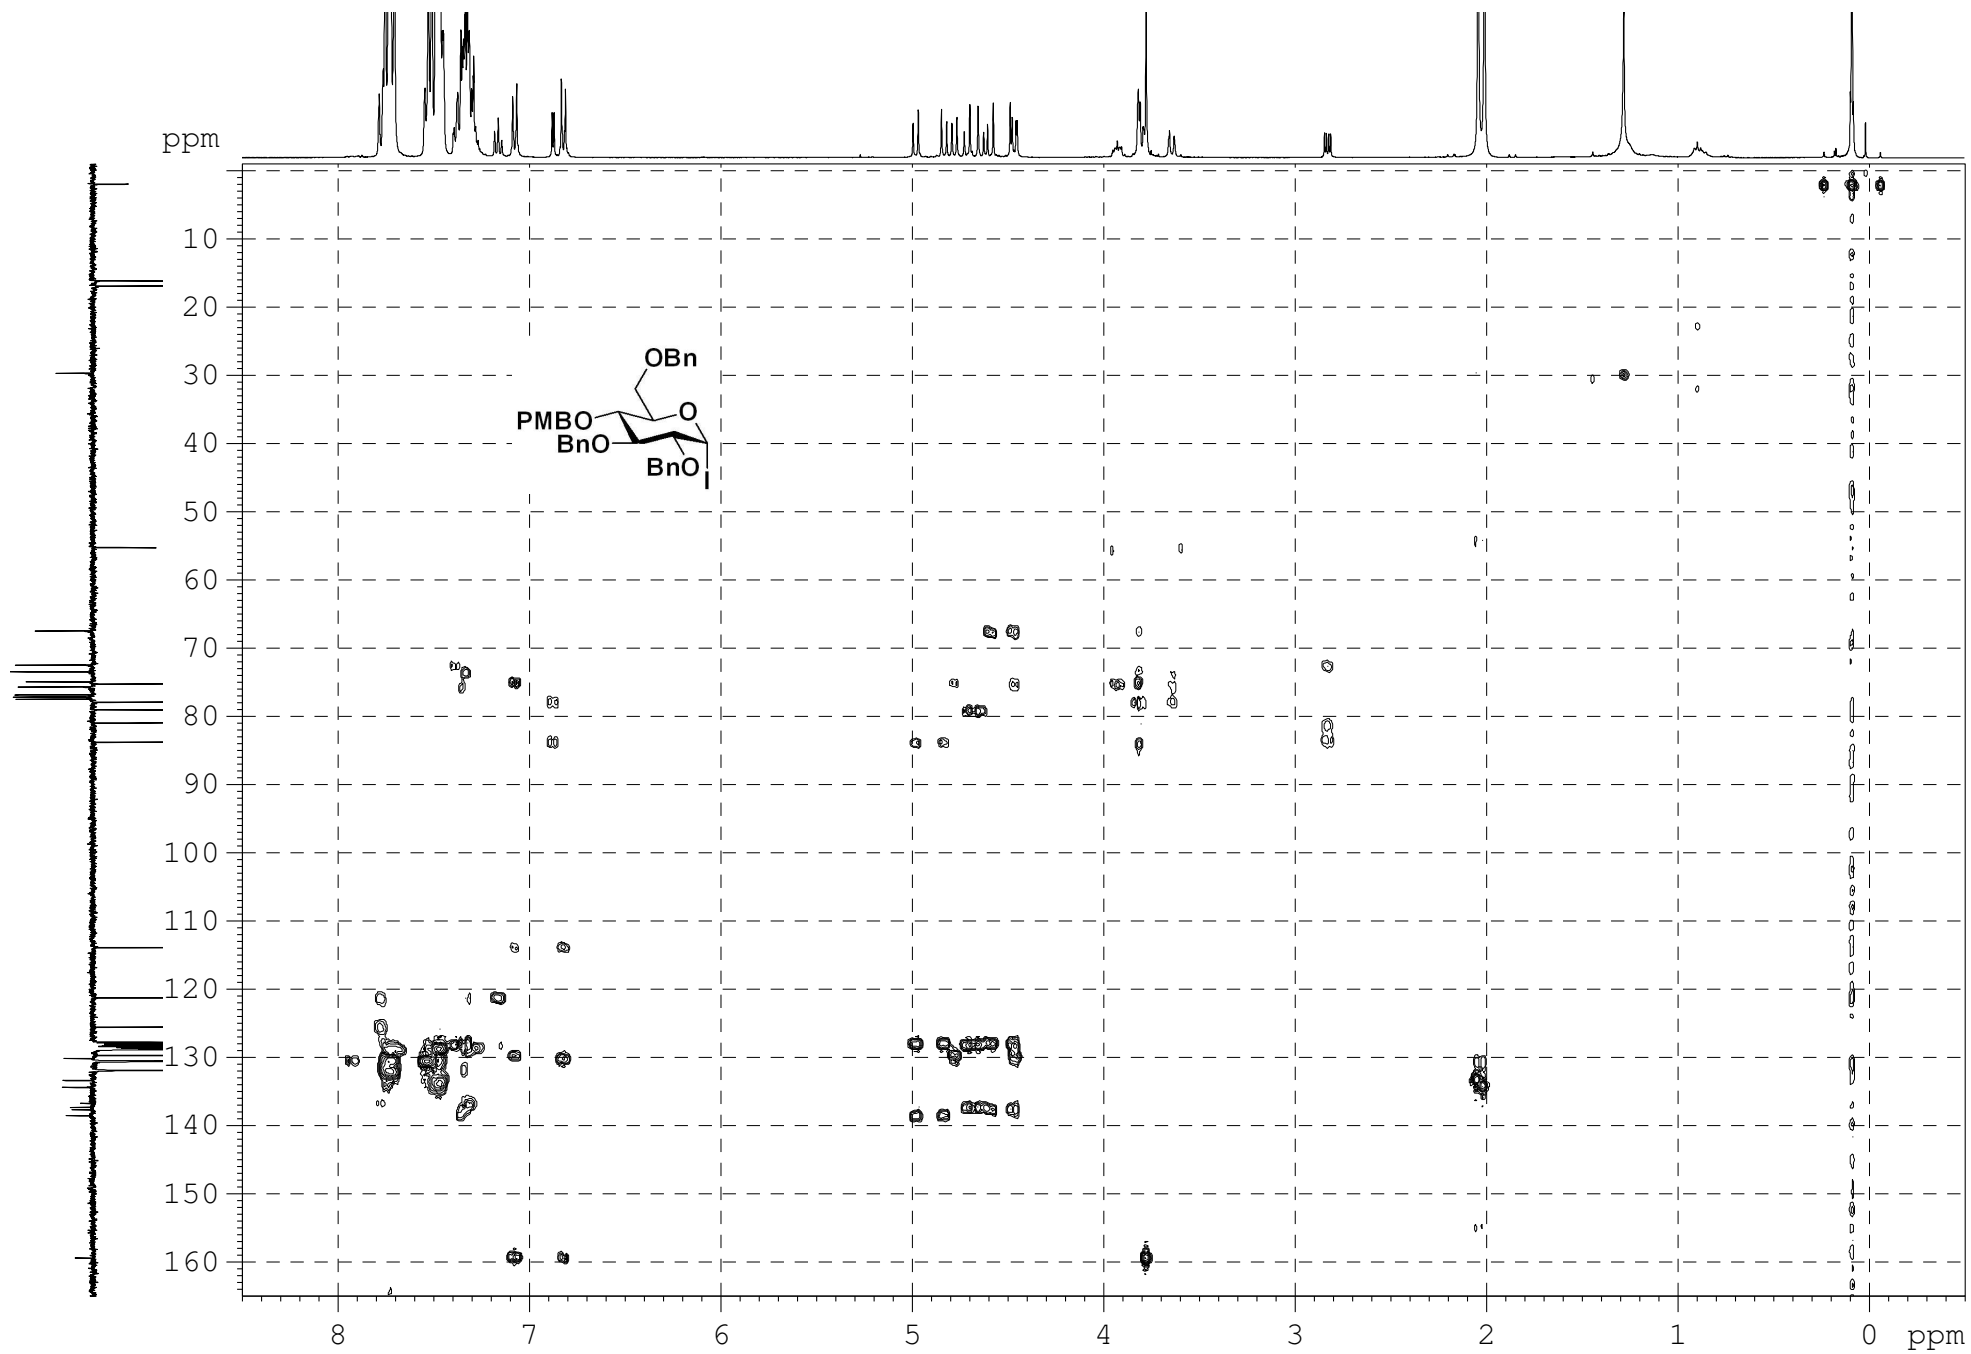

<sup>1</sup>H-NMR, <sup>13</sup>C-APT, <sup>1</sup>H-<sup>1</sup>H COSY, HSQC, HMBC, GATED of **27**, α:β = 1:1

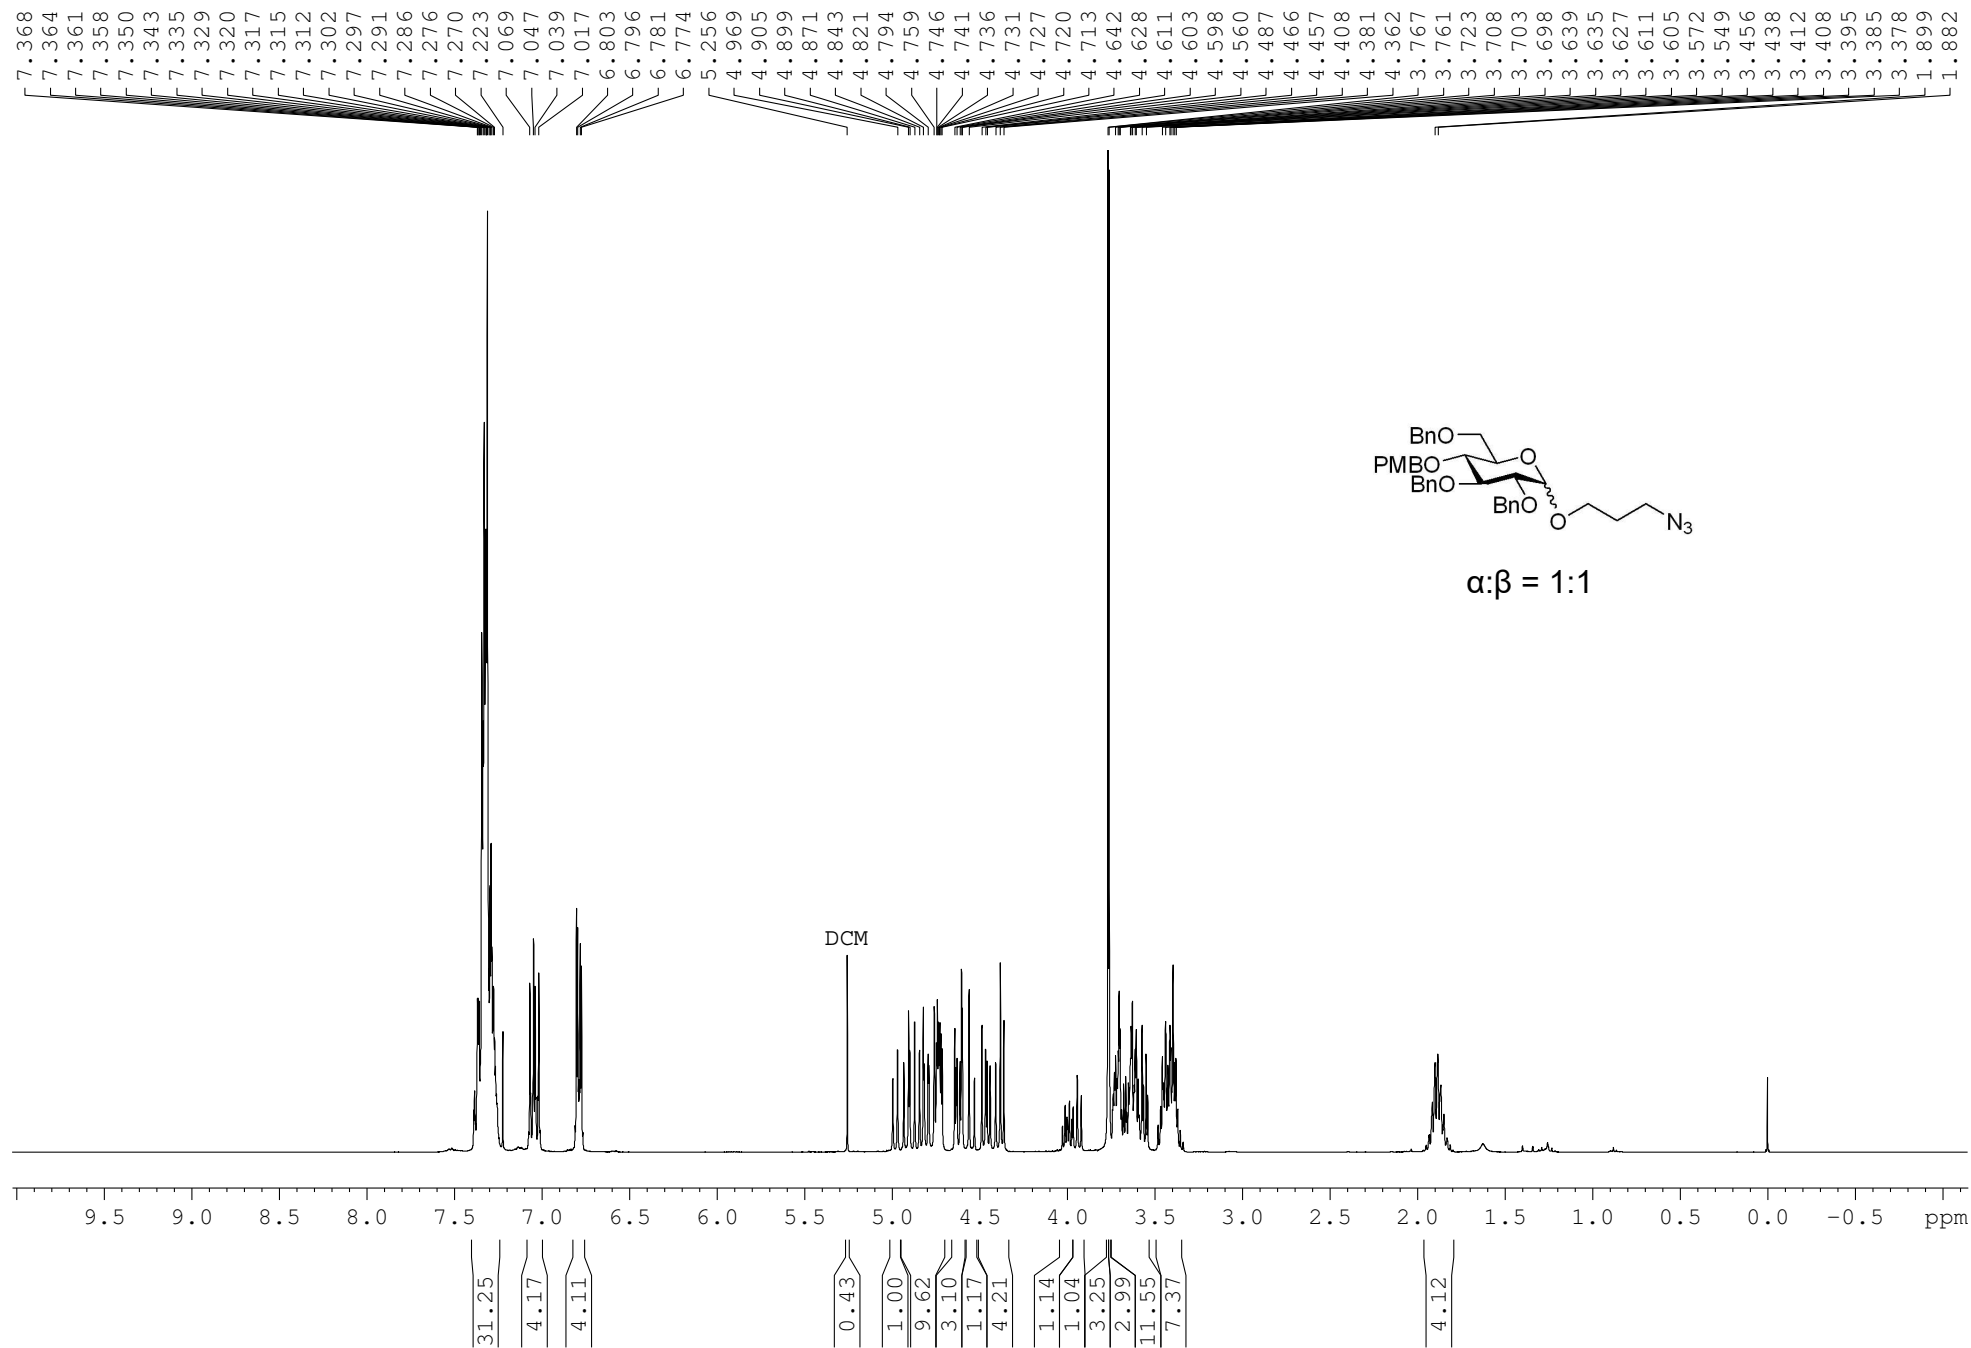

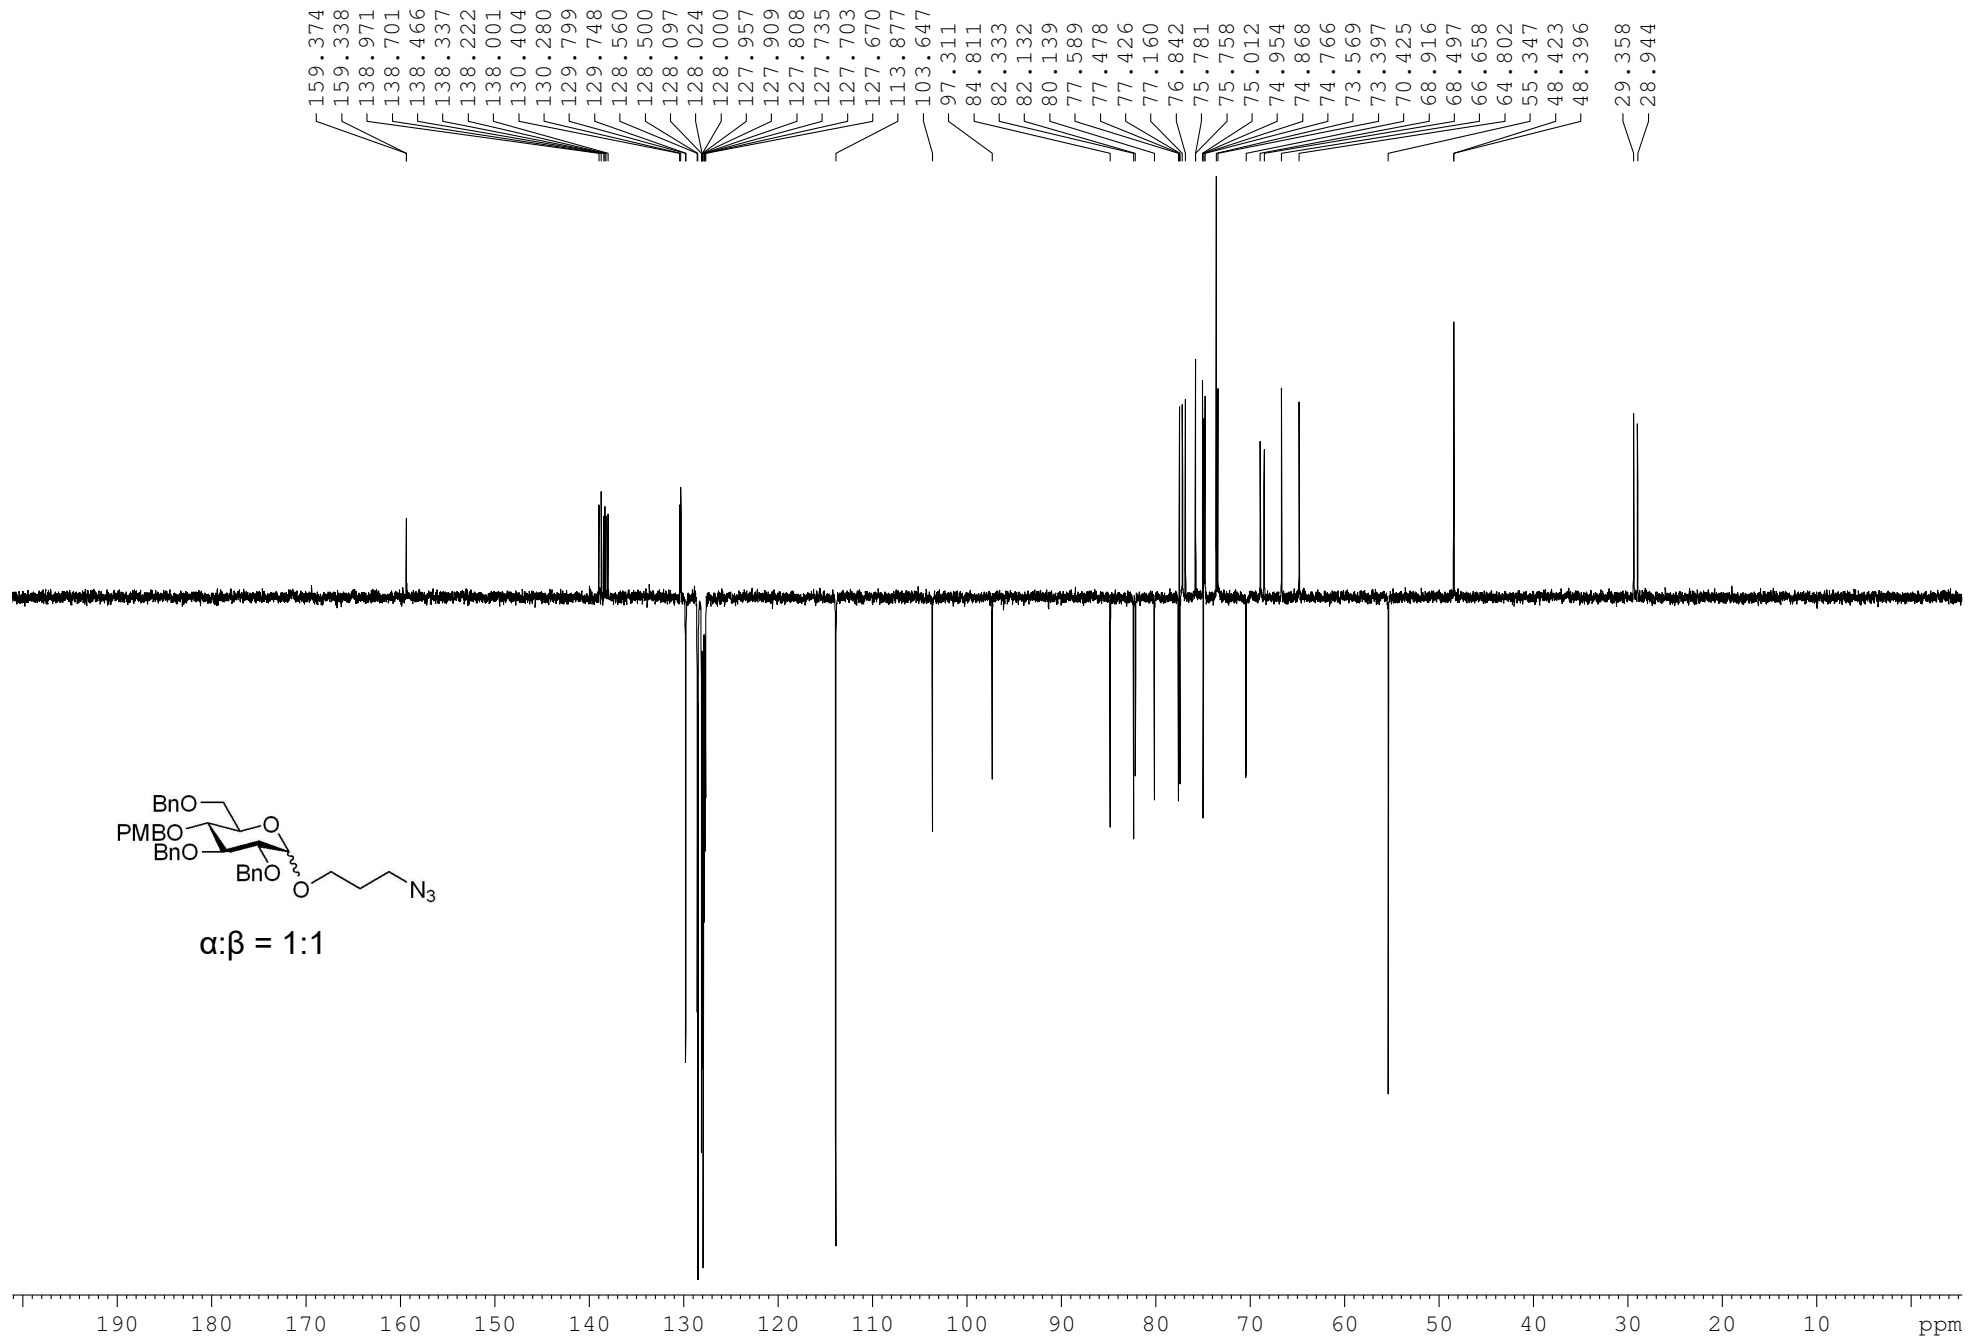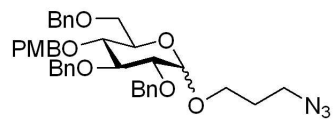

$\alpha:\beta = 1:1$

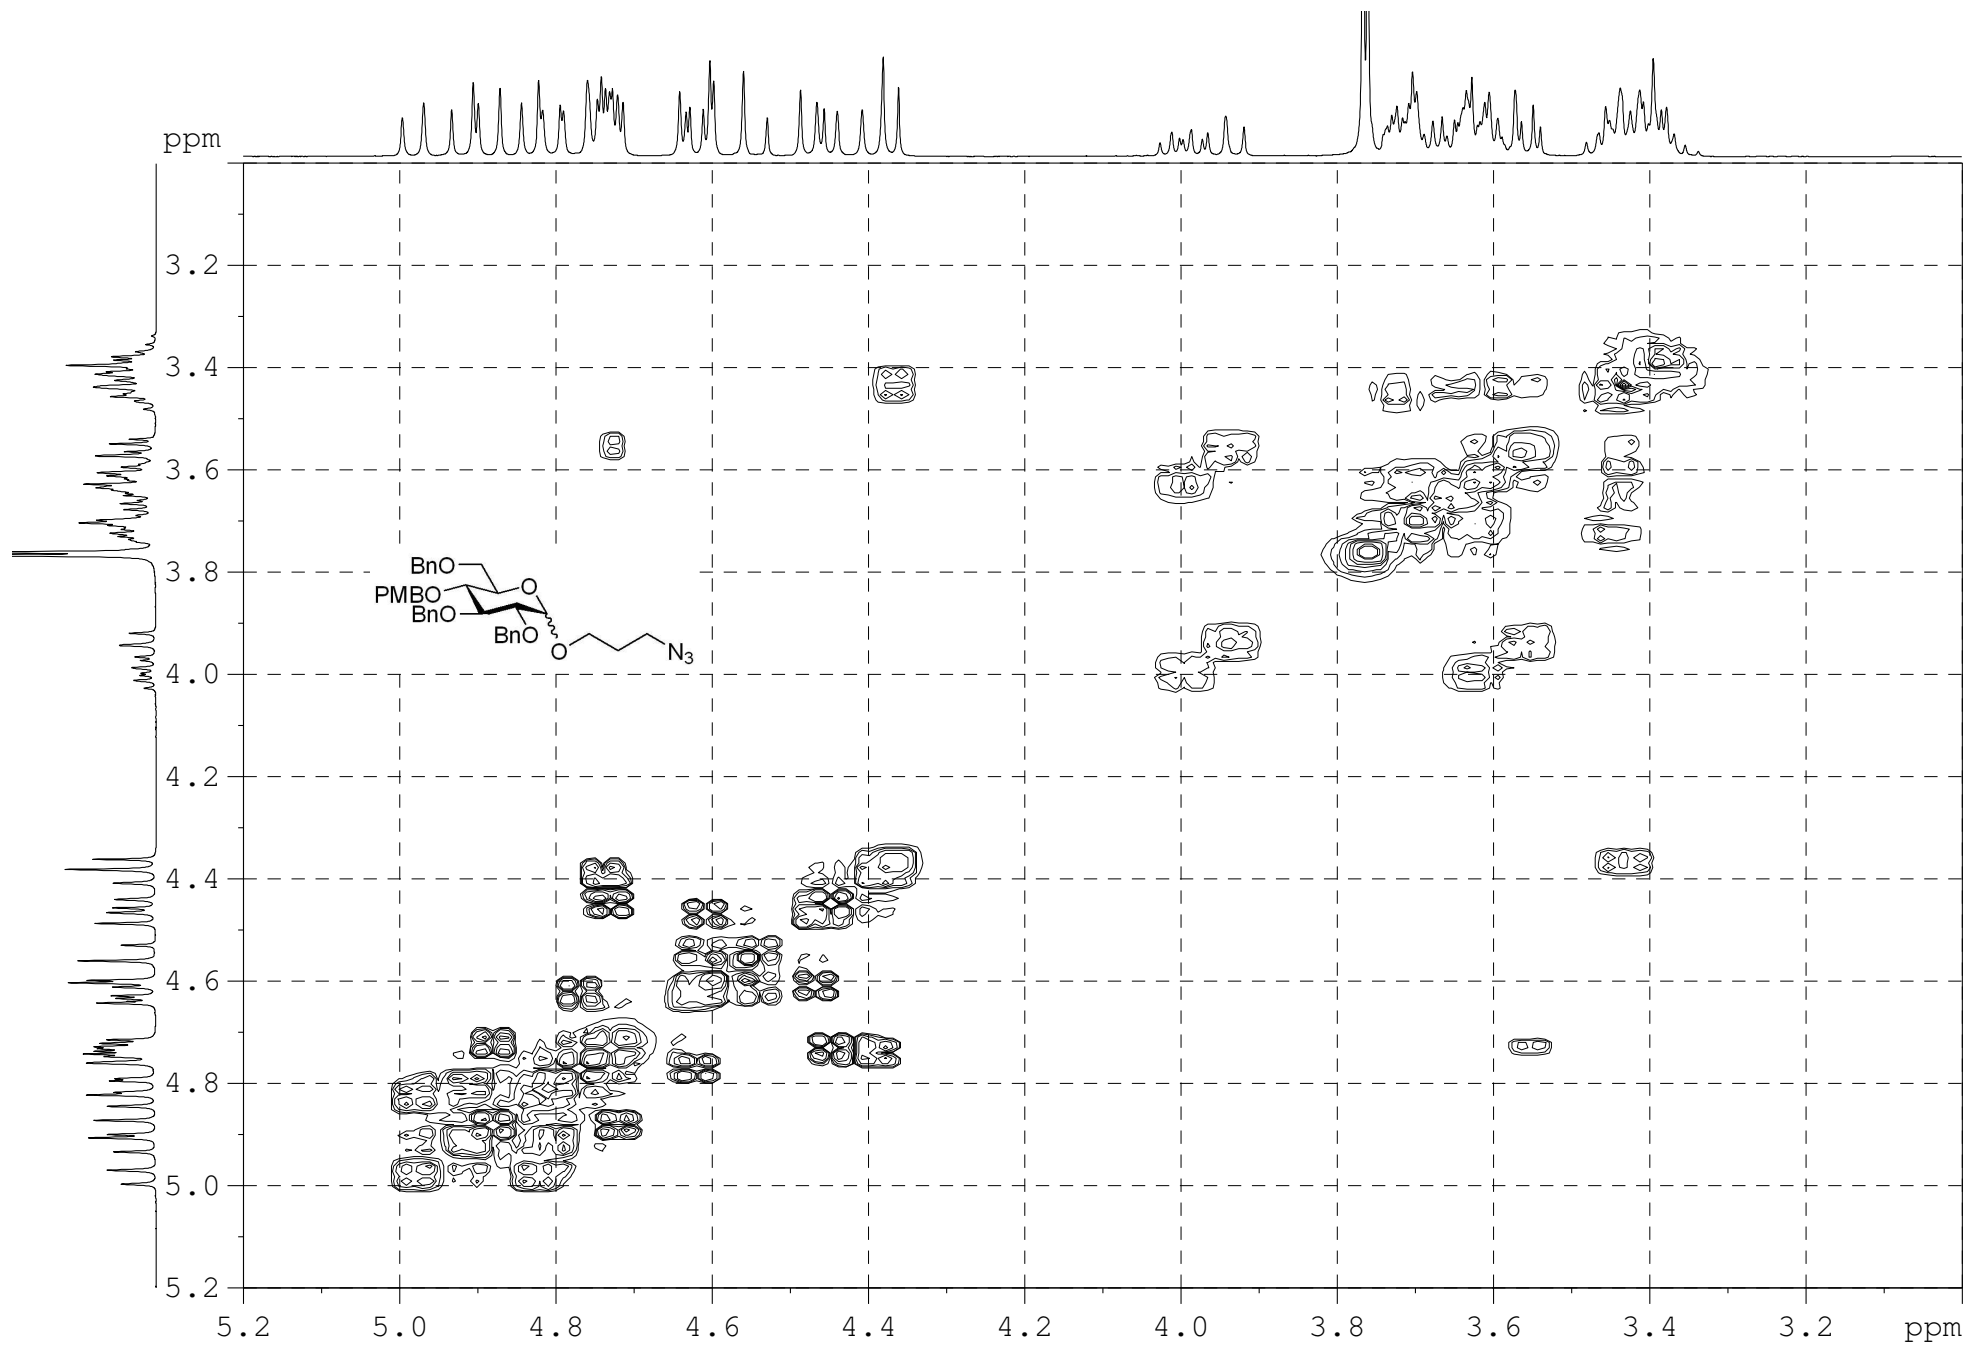

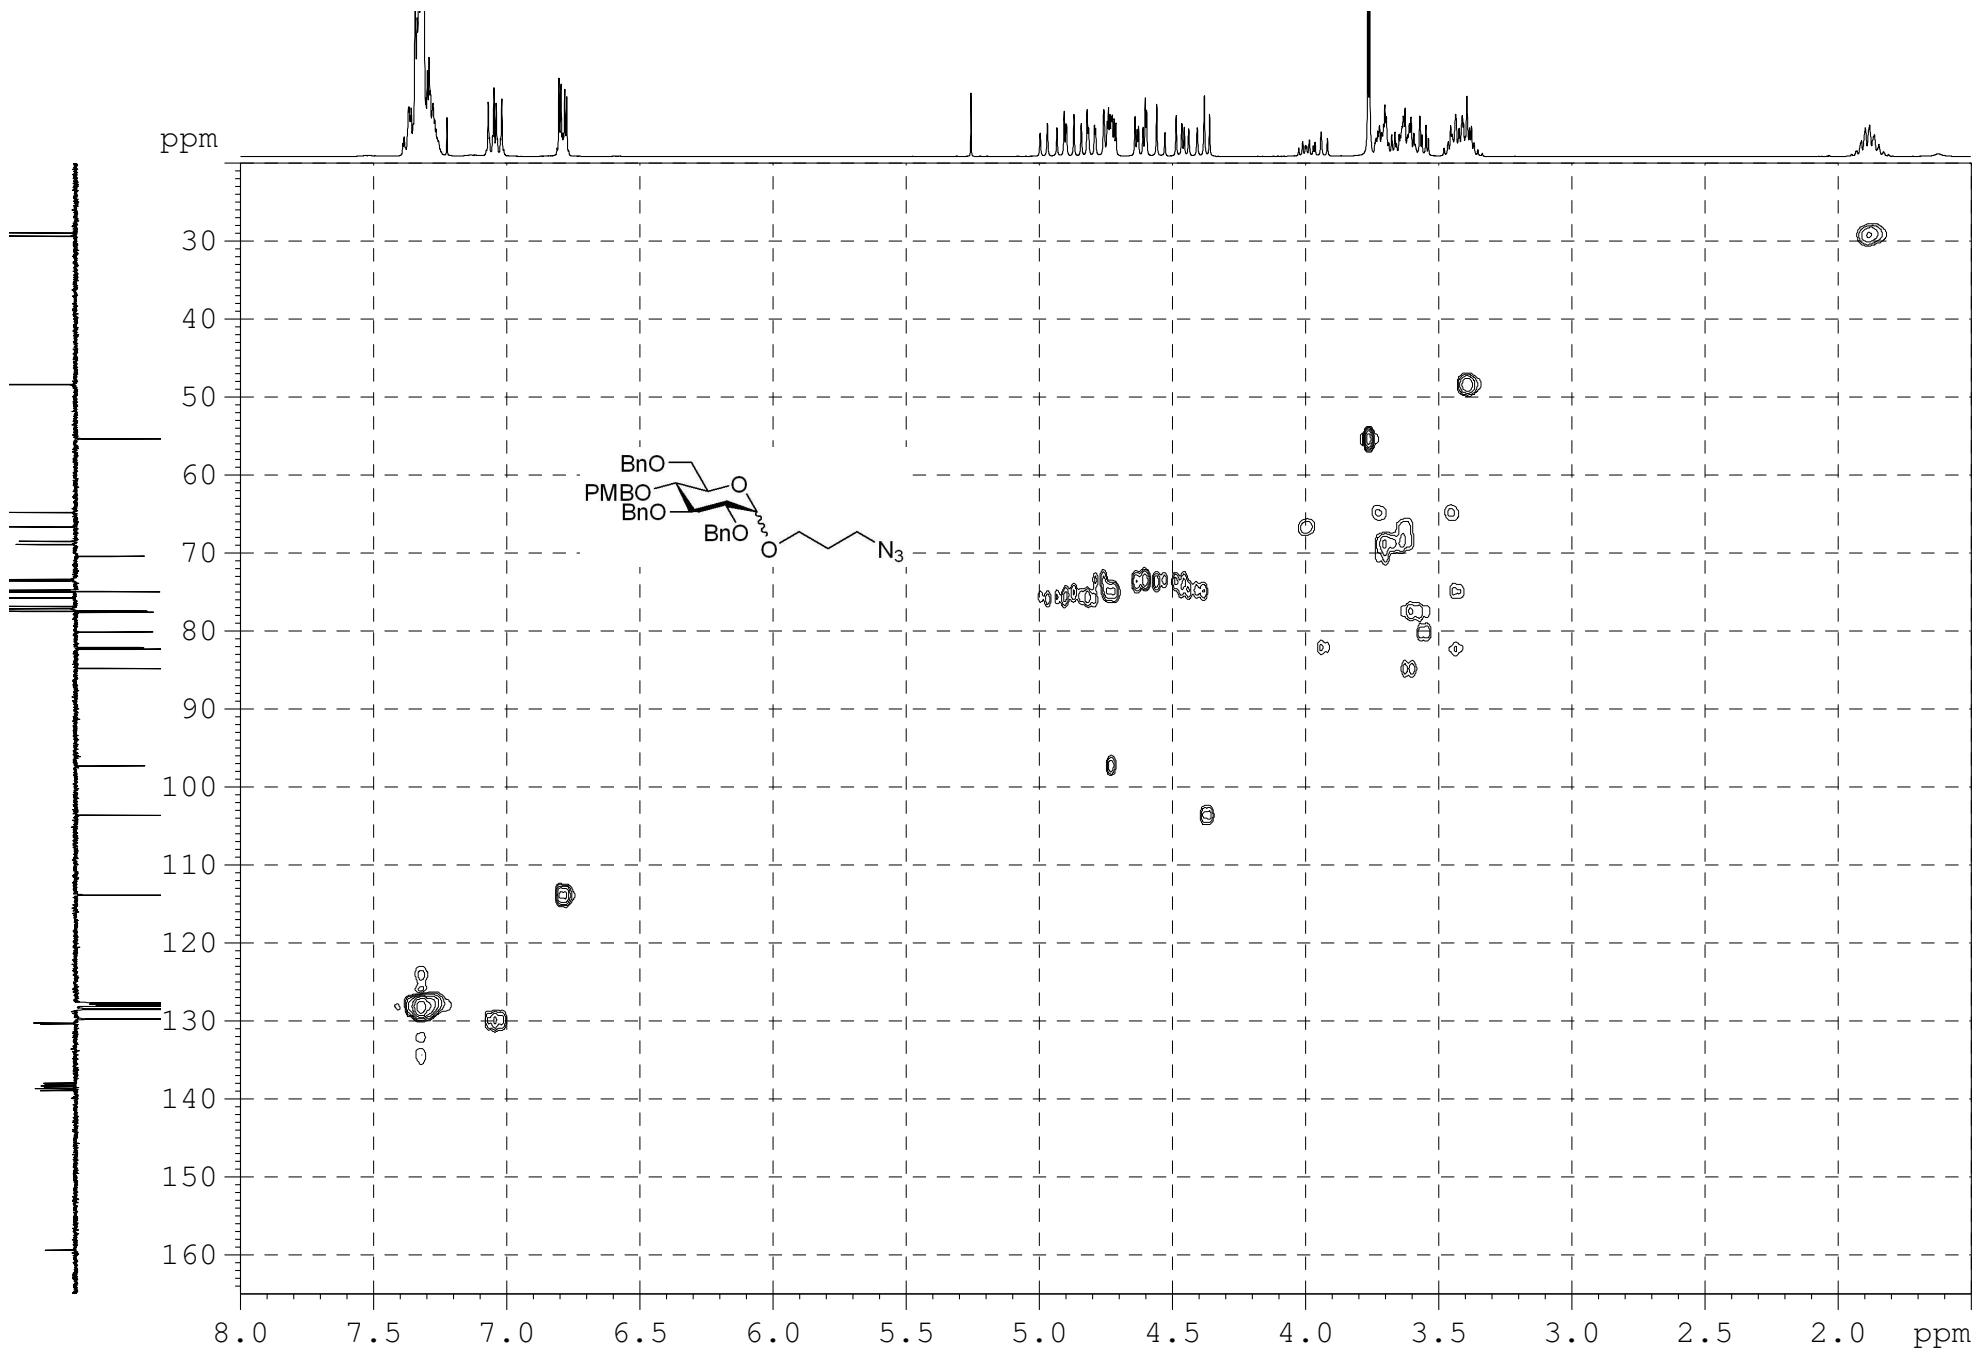



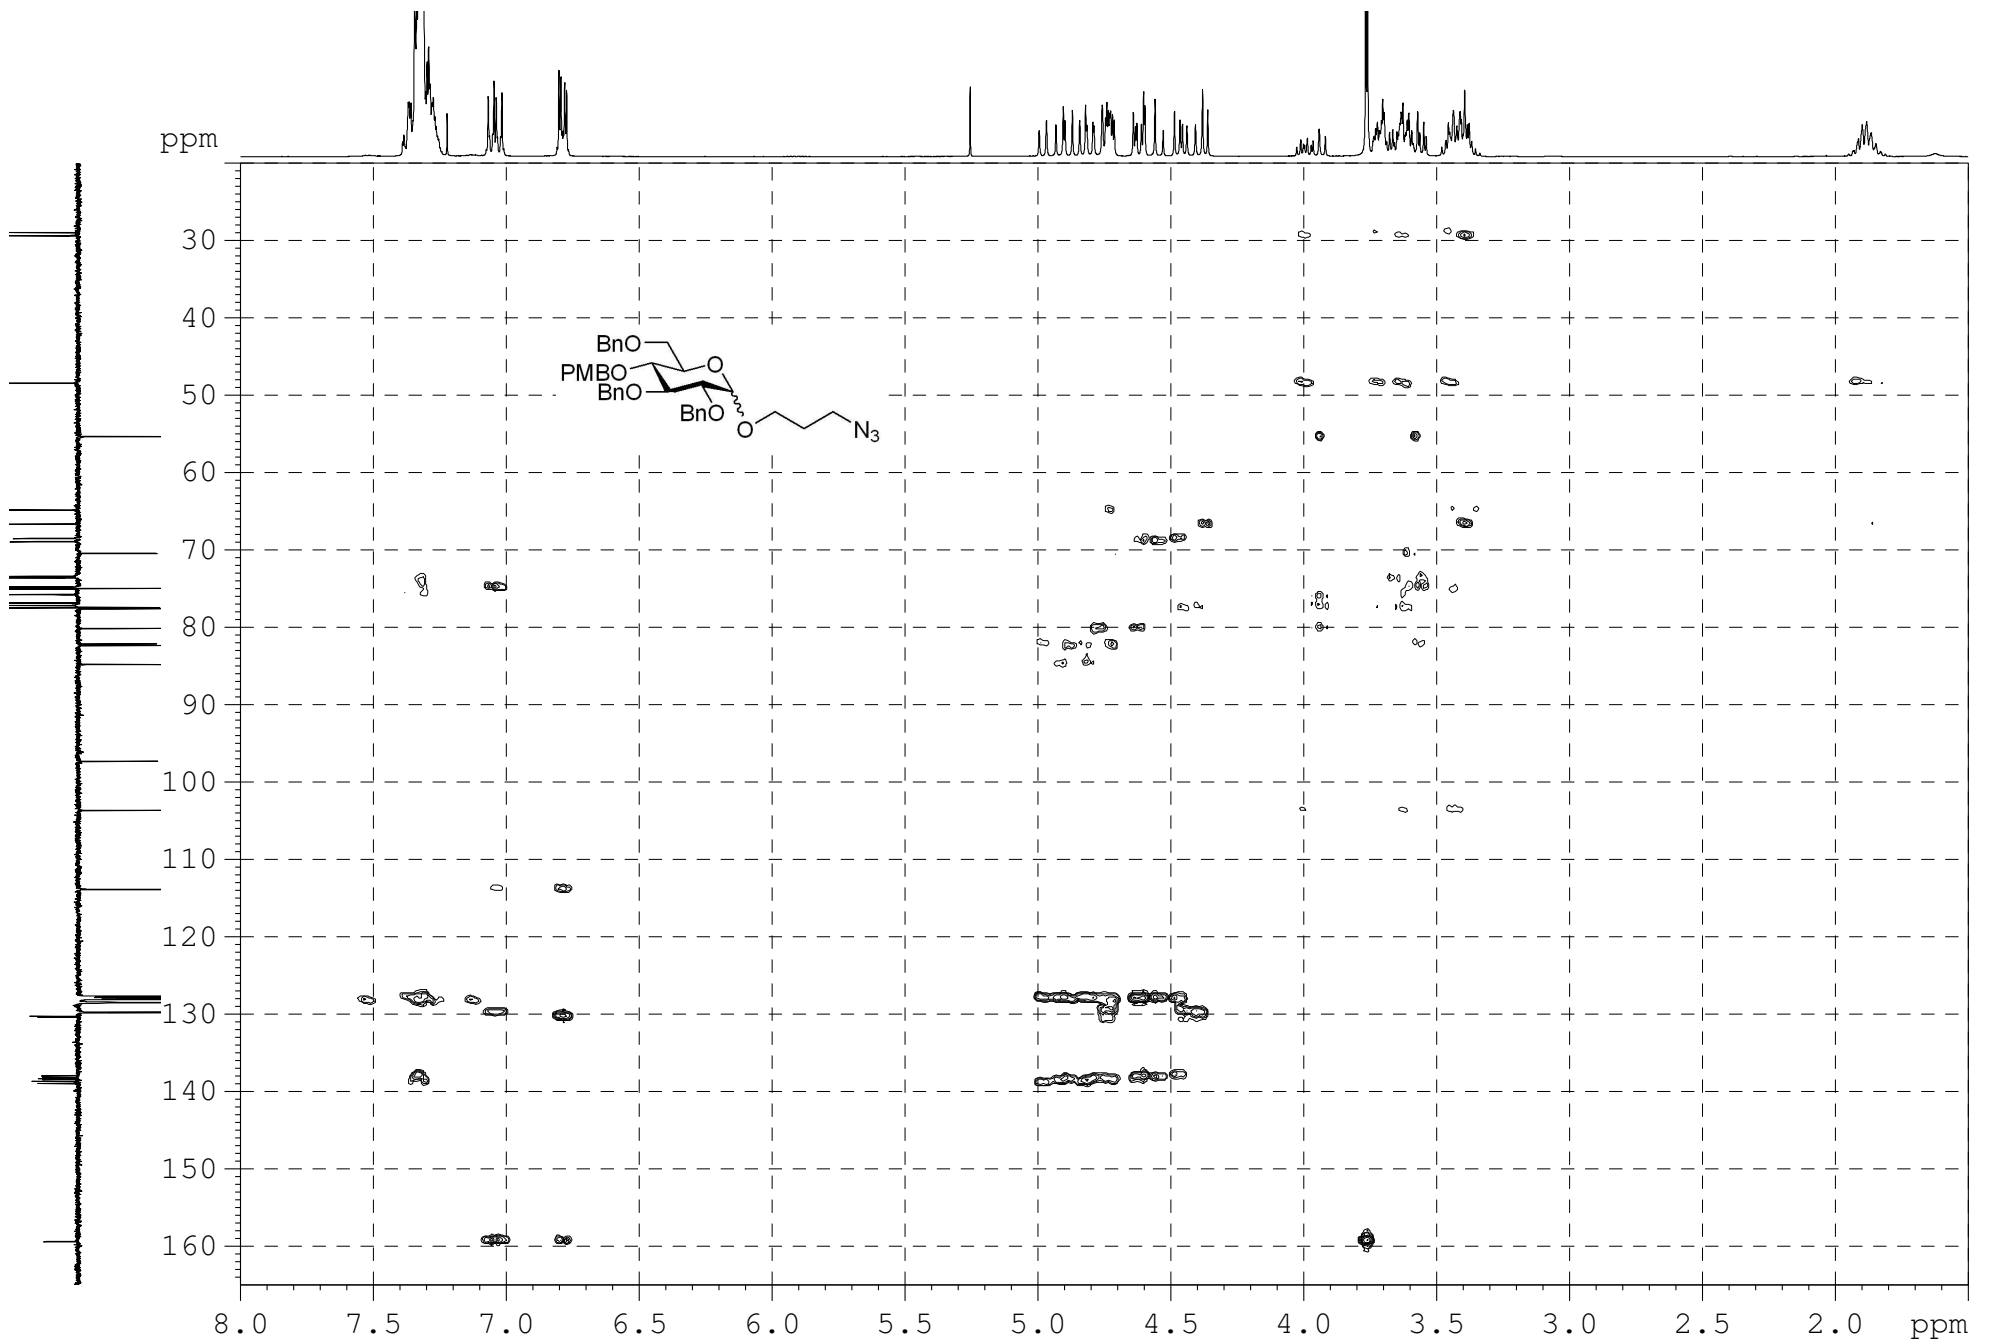

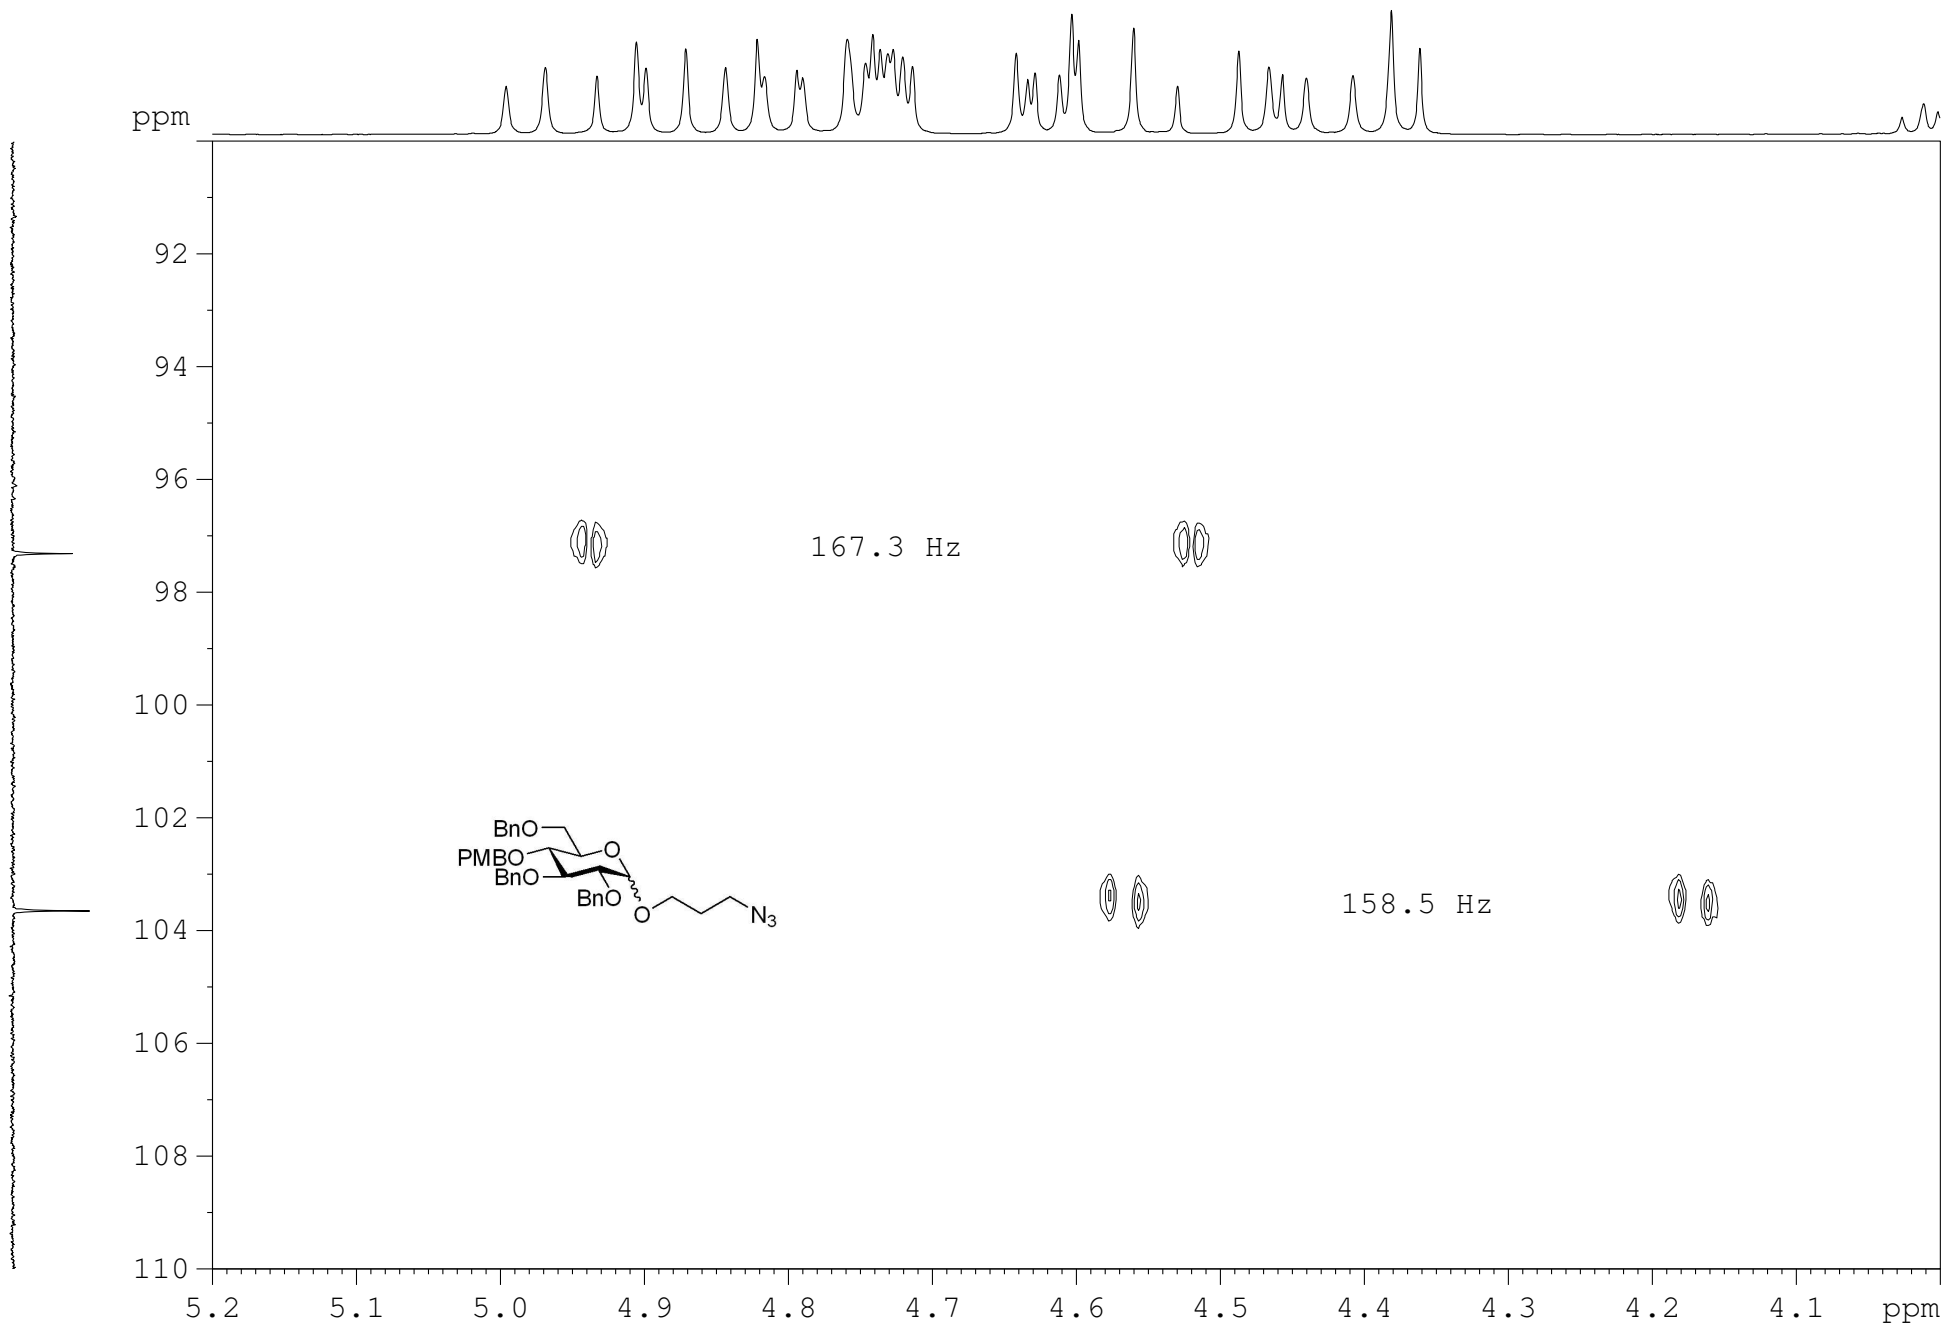



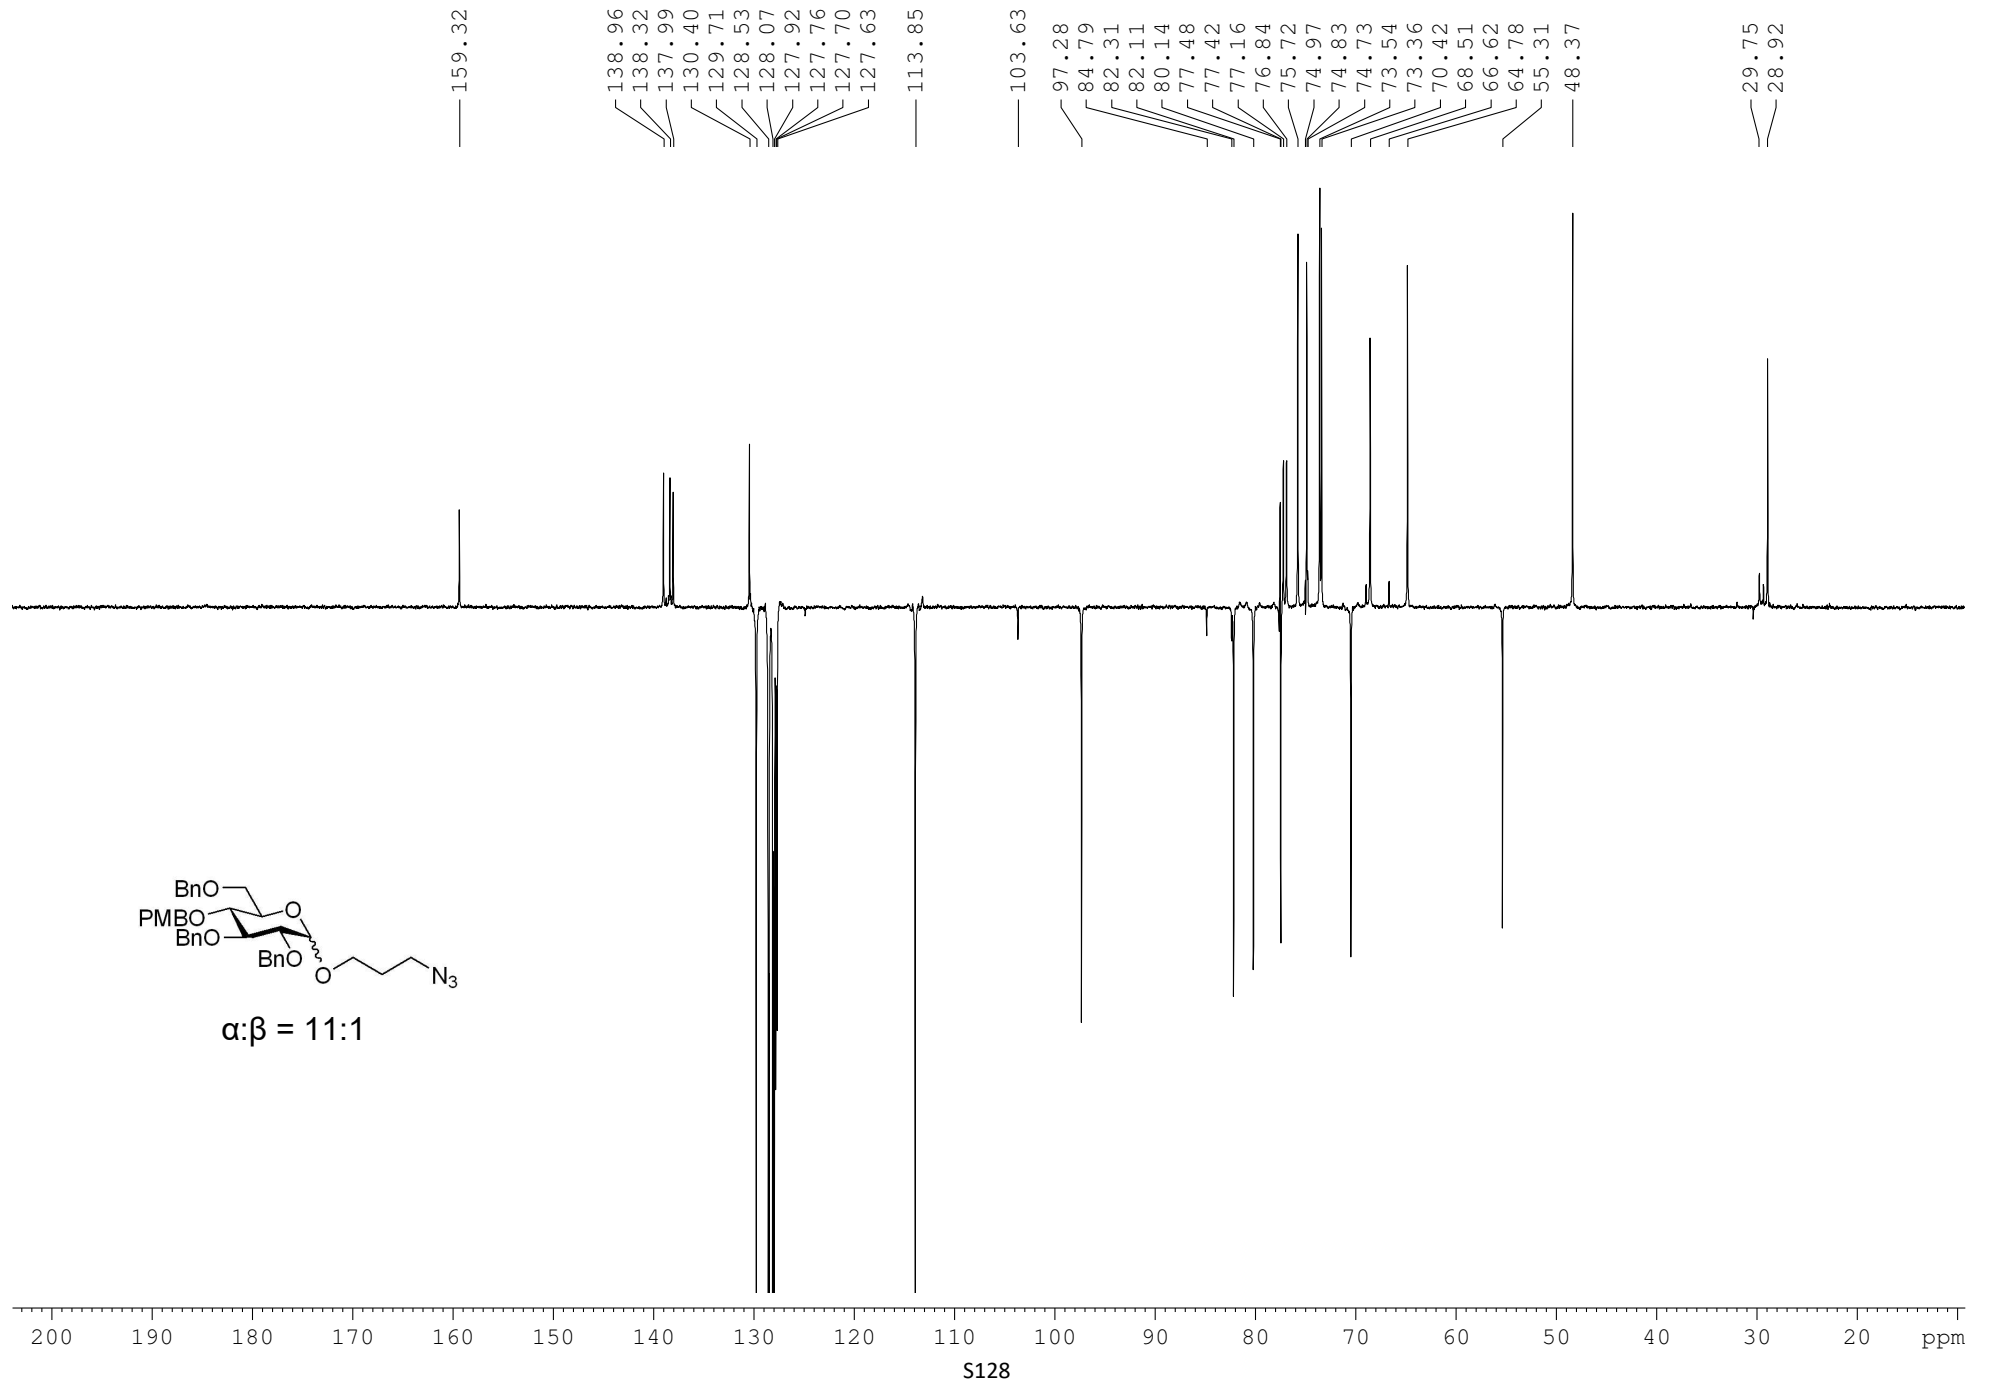

<sup>1</sup>H-NMR, <sup>13</sup>C-APT, <sup>1</sup>H-<sup>1</sup>H COSY, HSQC, HMBC, GATED of 27

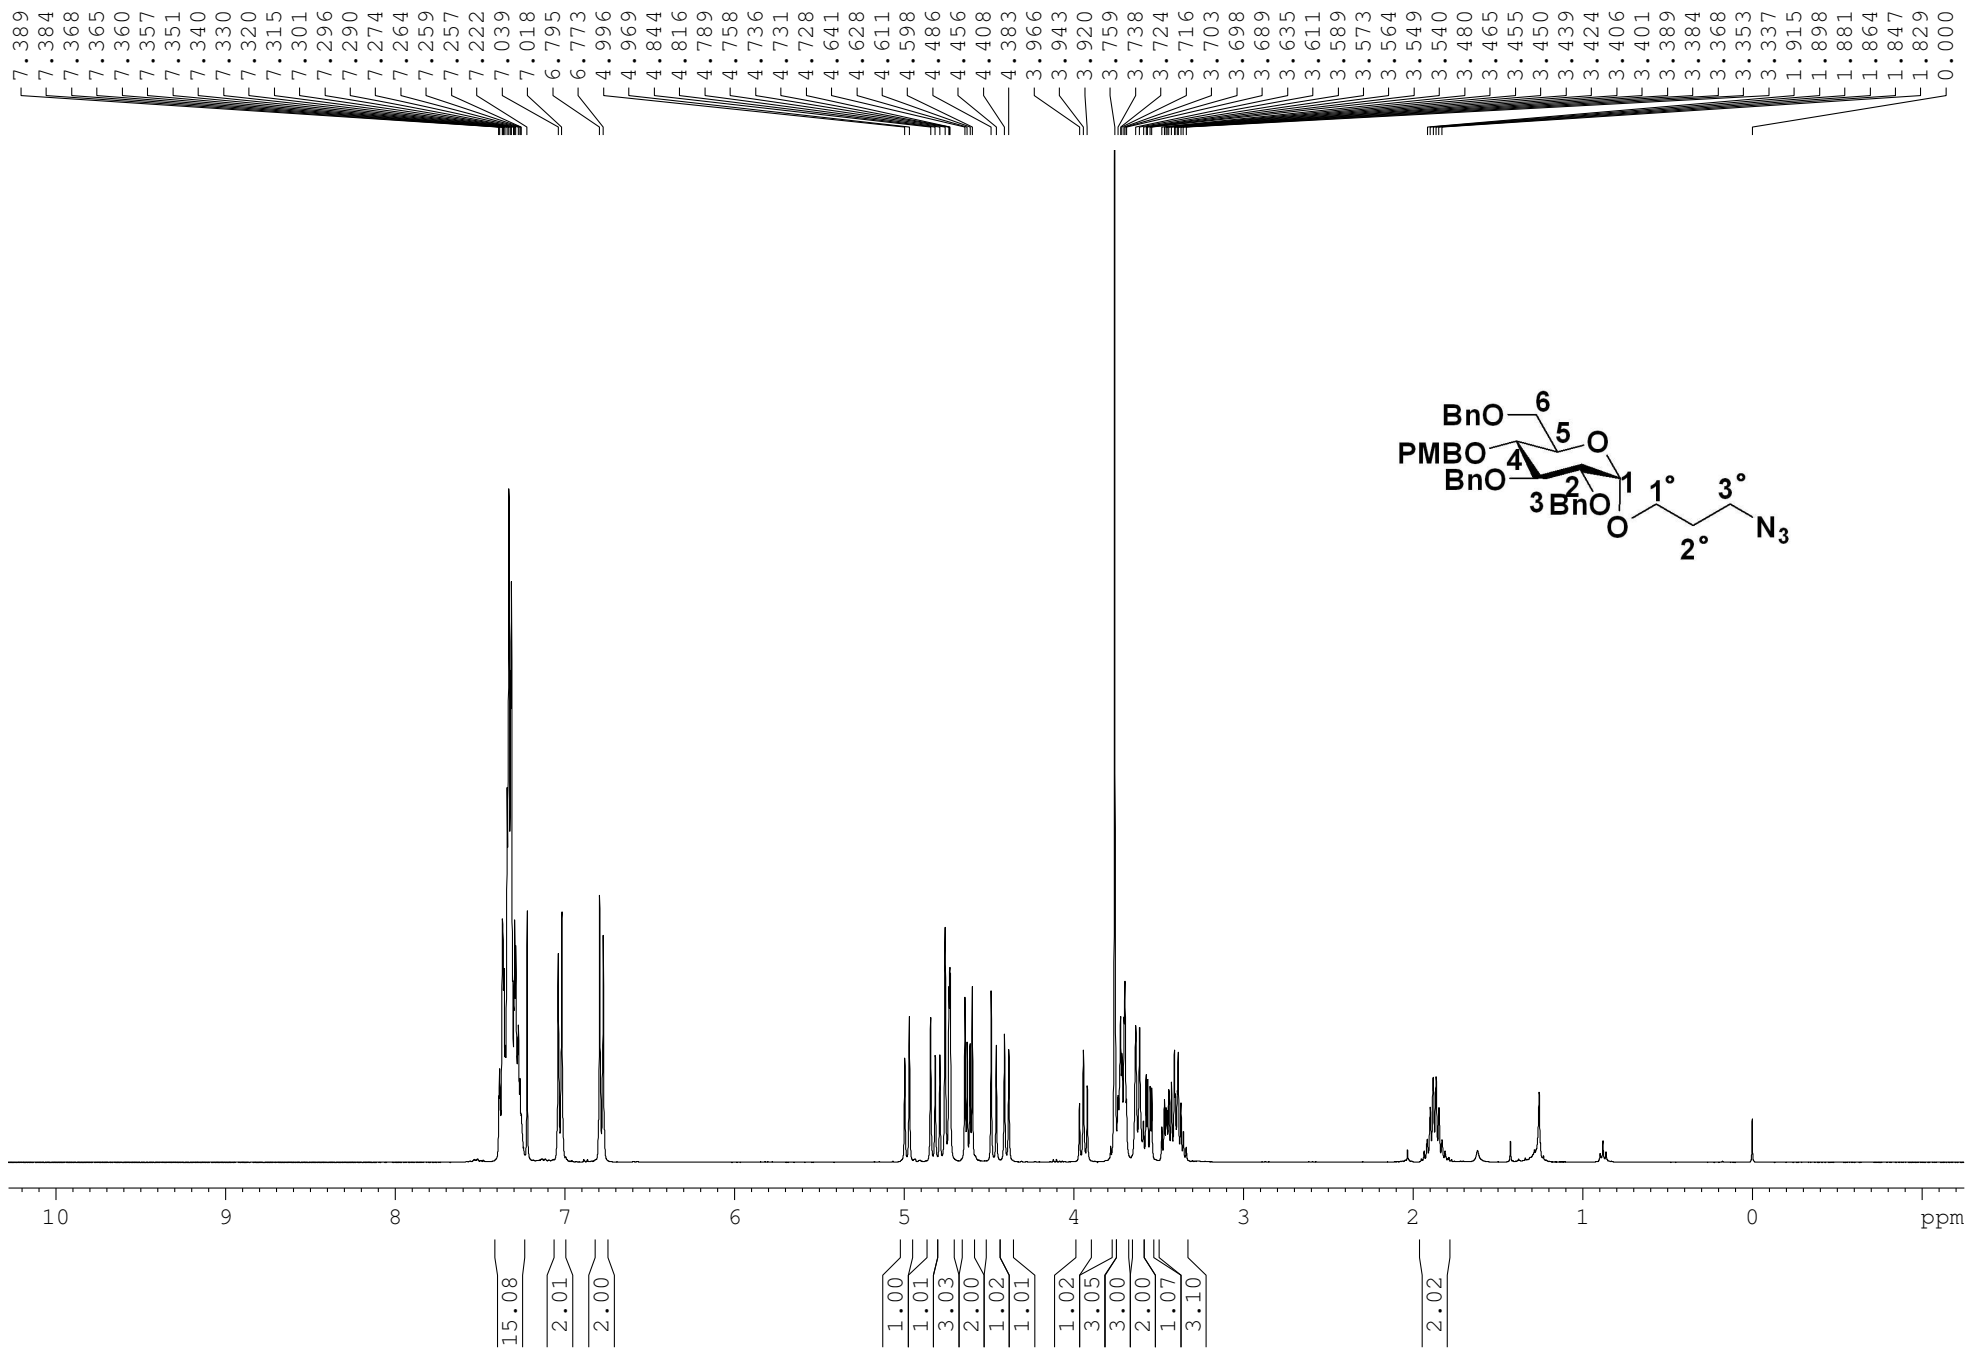

7.389  
7.384  
7.368  
7.365  
7.360  
7.357  
7.351  
7.340  
7.330  
7.320  
7.315  
7.301  
7.296  
7.290  
7.274  
7.264  
7.259  
7.257  
7.222  
7.039  
7.018  
6.795  
6.773  
4.996  
4.969  
4.844  
4.816  
4.789  
4.758  
4.736  
4.731  
4.728  
4.641  
4.628  
4.611  
4.598  
4.486  
4.456  
4.408  
4.383  
3.966  
3.943  
3.920  
3.759  
3.738  
3.724  
3.716  
3.703  
3.698  
3.689  
3.635  
3.611  
3.589  
3.573  
3.564  
3.549  
3.540  
3.480  
3.465  
3.455  
3.450  
3.439  
3.424  
3.406  
3.401  
3.389  
3.384  
3.368  
3.353  
3.337  
1.915  
1.898  
1.881  
1.864  
1.847  
1.829  
0.000

15.08  
2.01  
2.00

1.00  
1.01  
3.03  
2.00  
1.02  
1.01  
1.02  
3.05  
3.00  
2.00  
1.07  
3.10

2.02

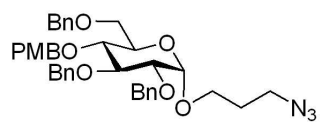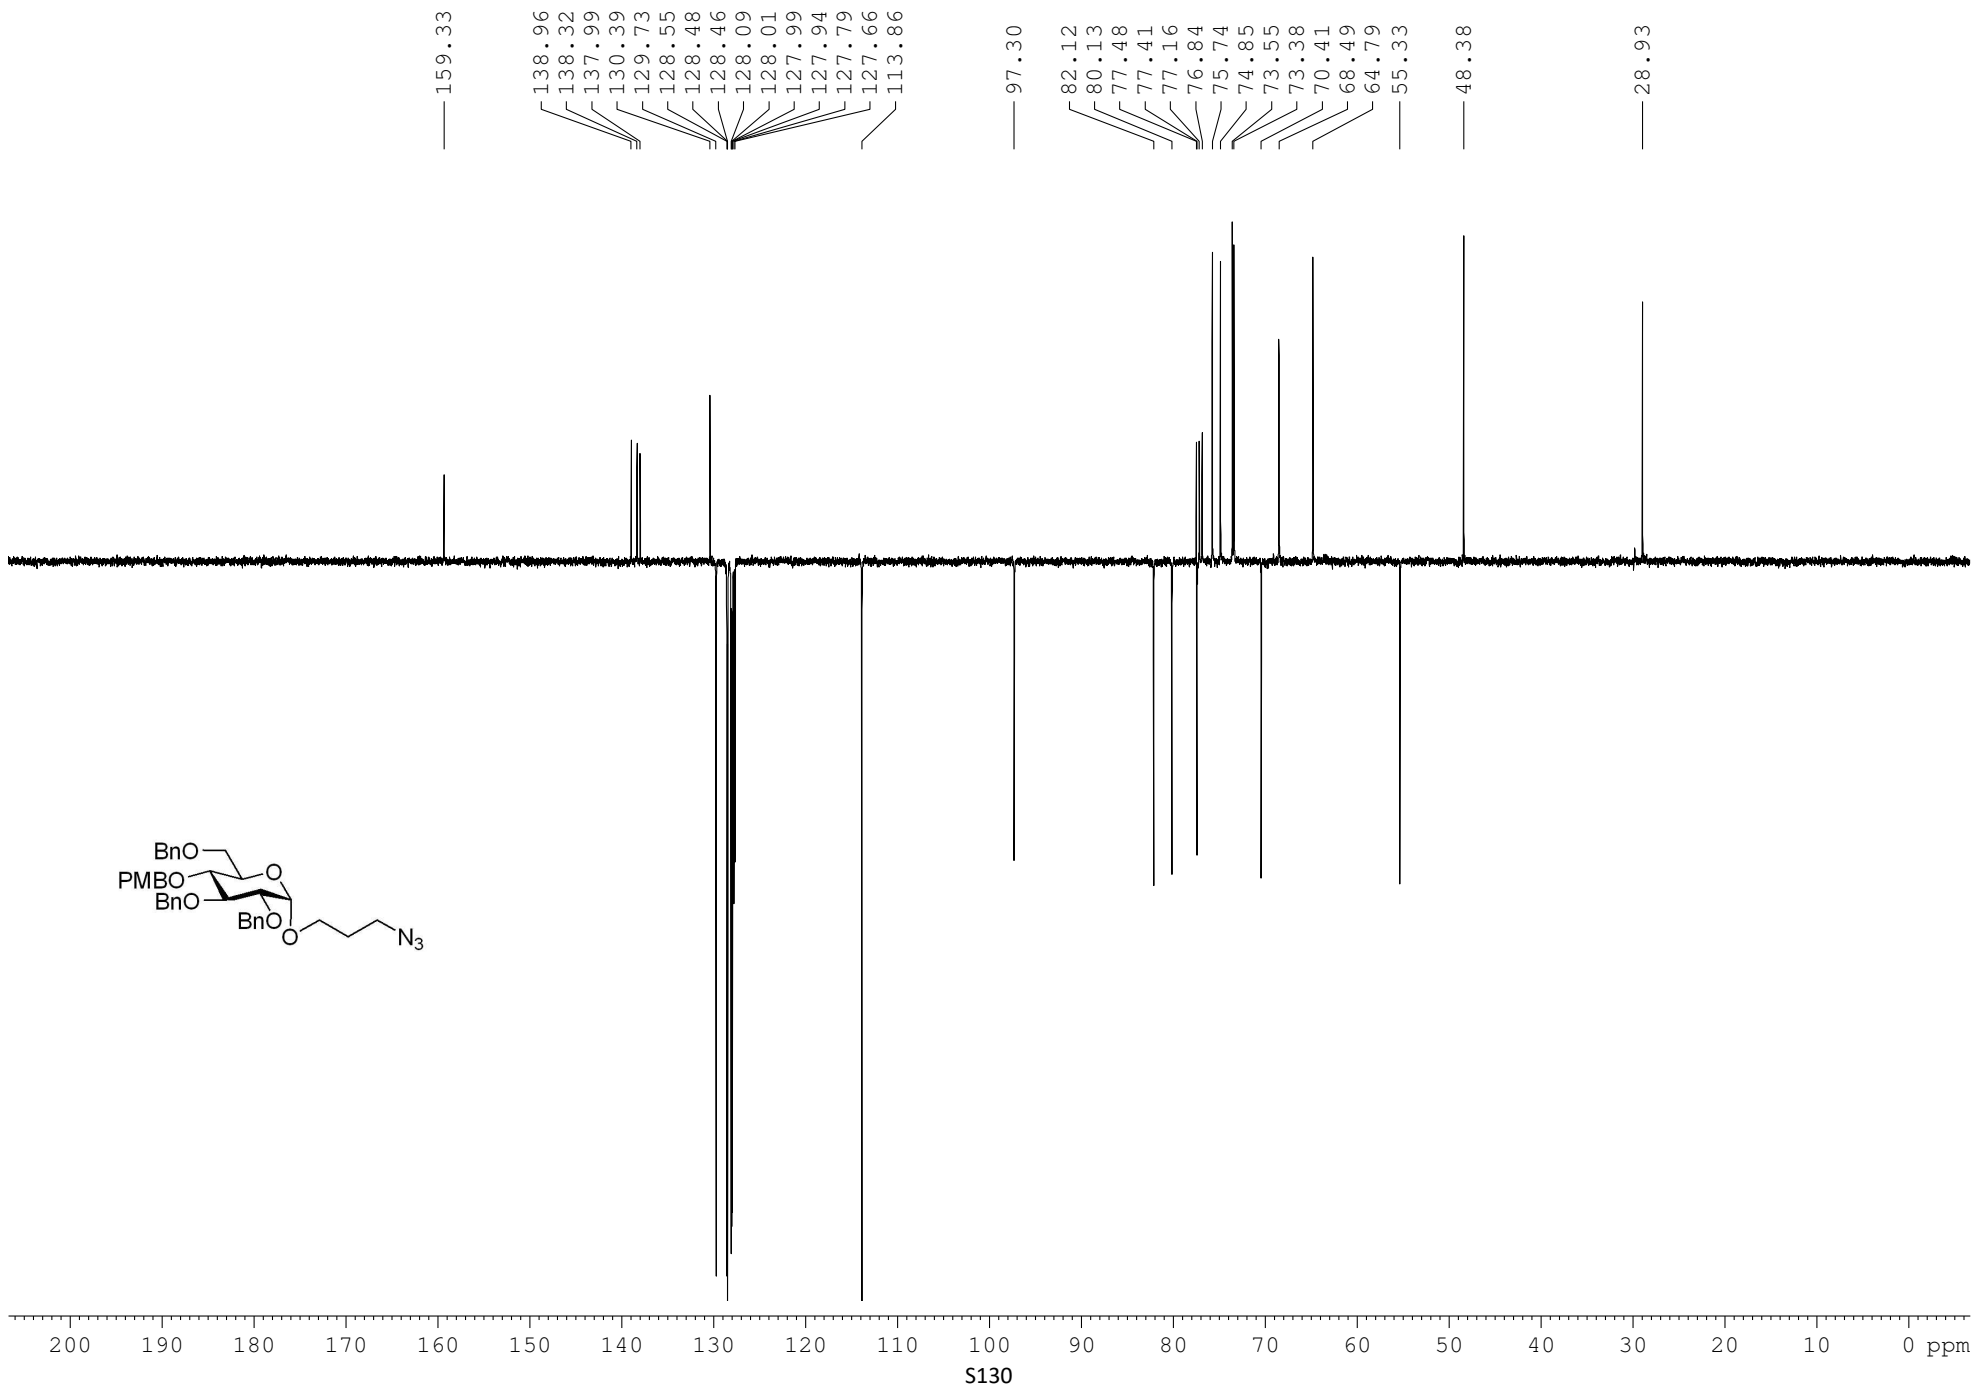

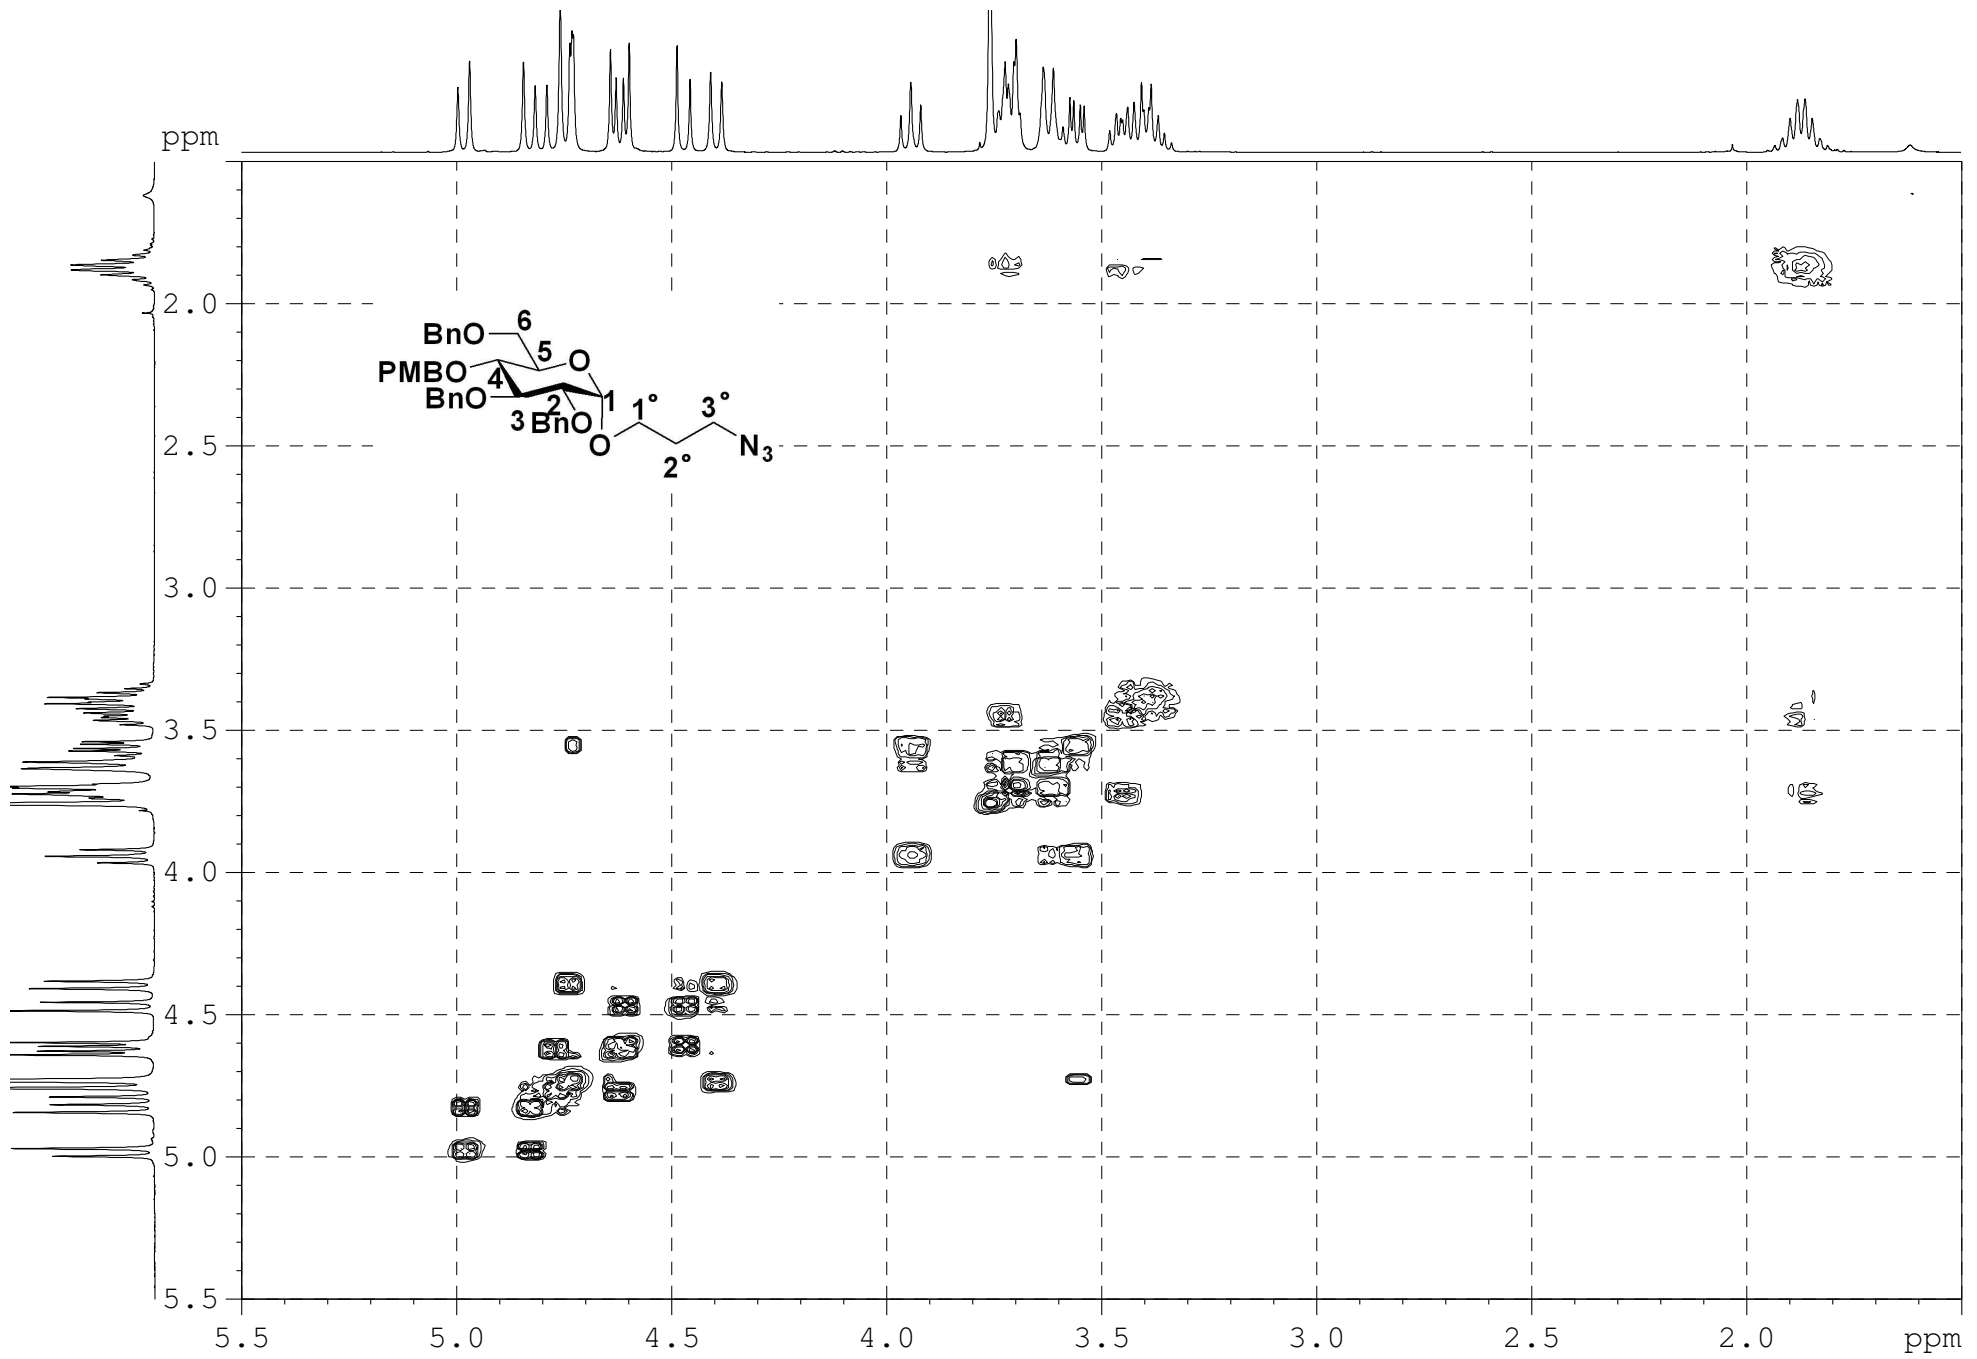

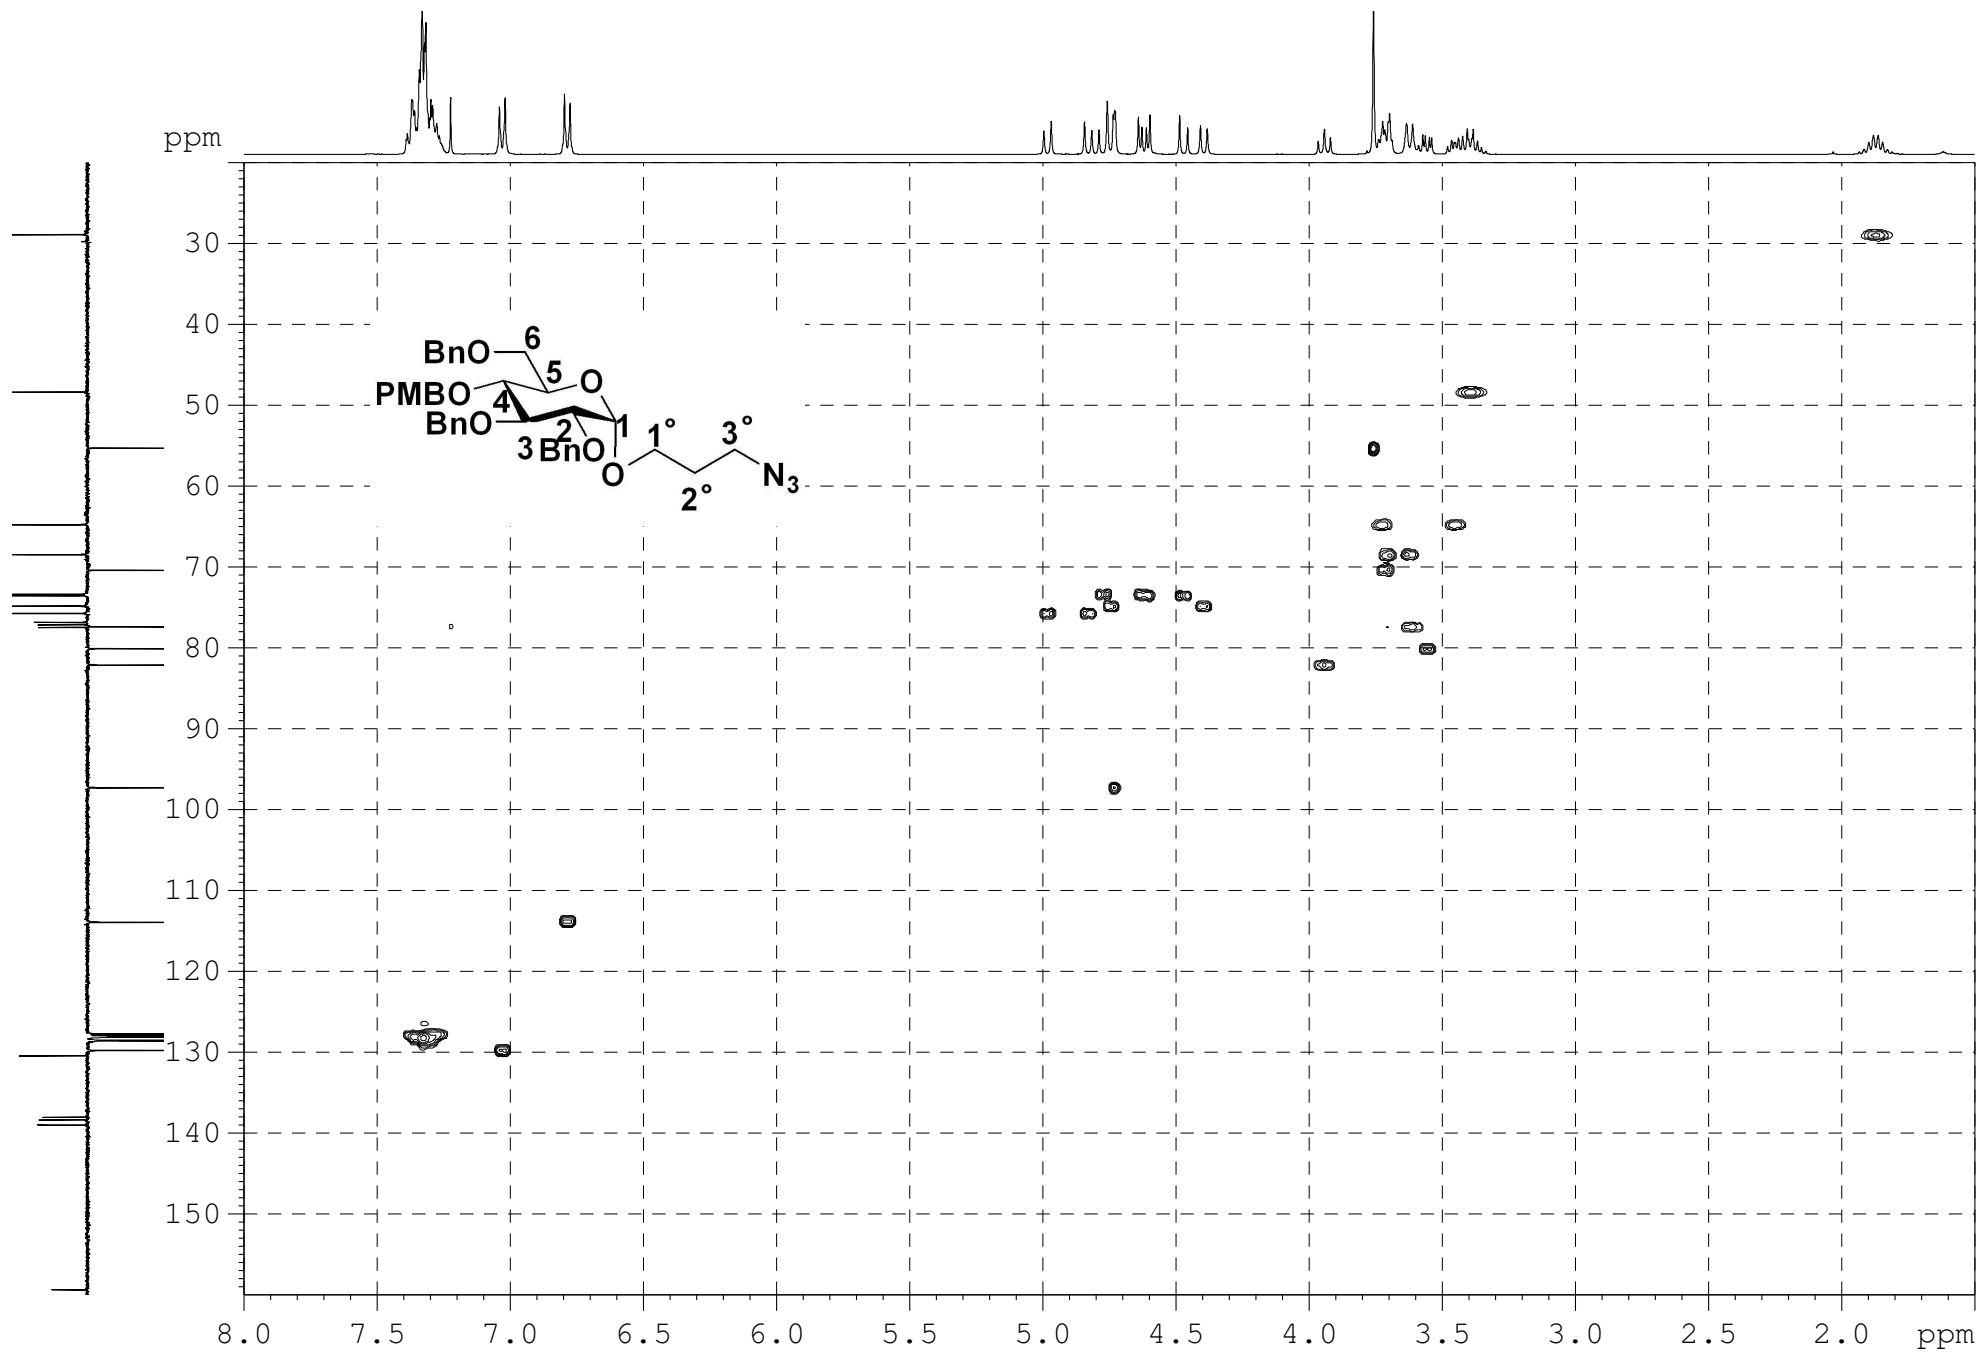



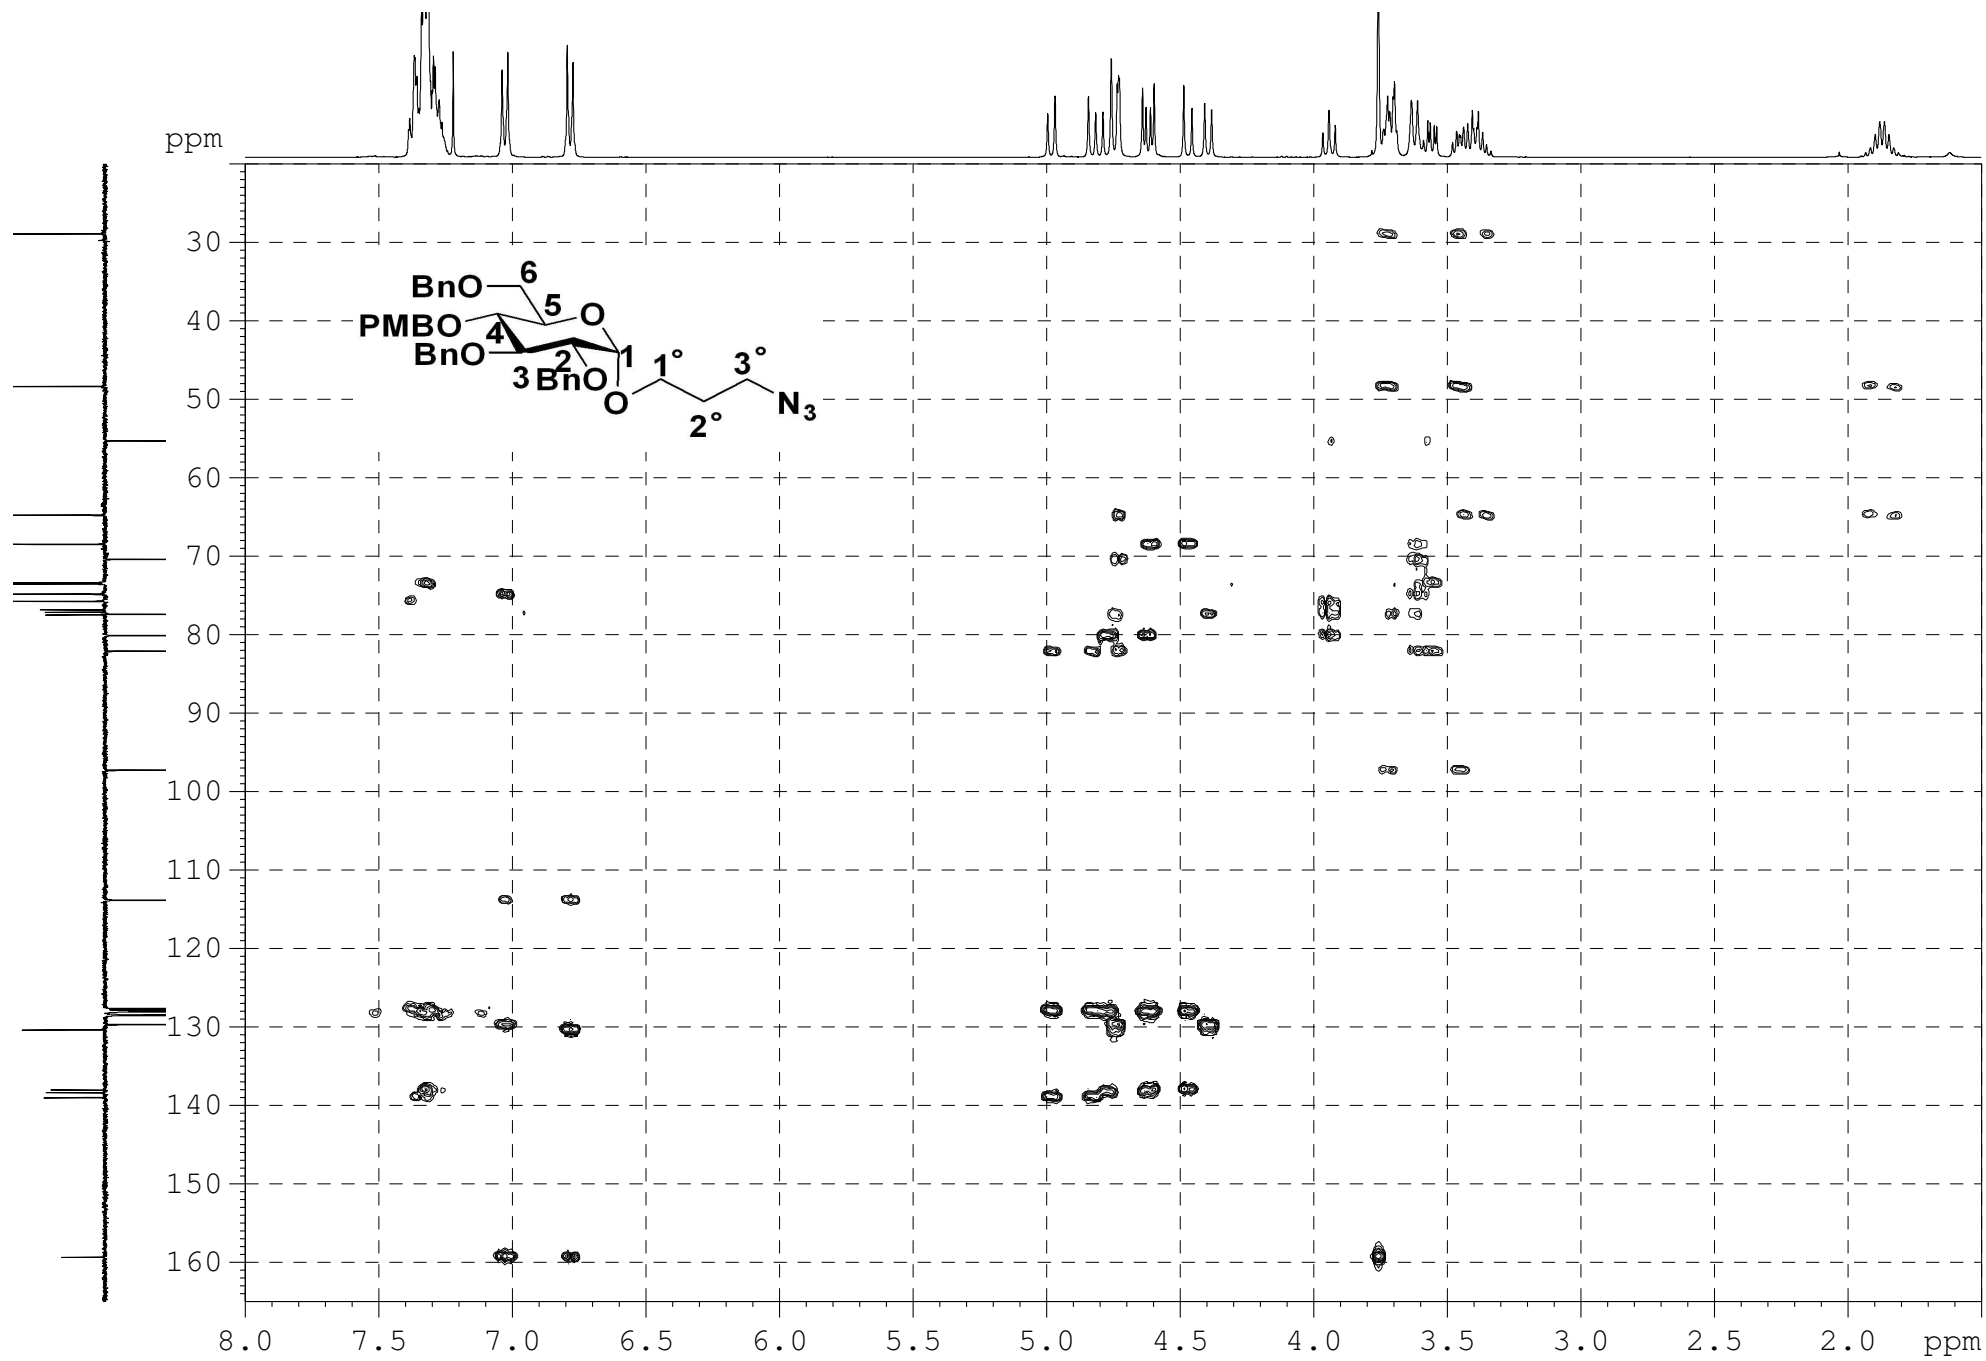

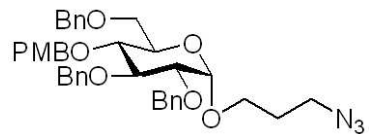

ppm

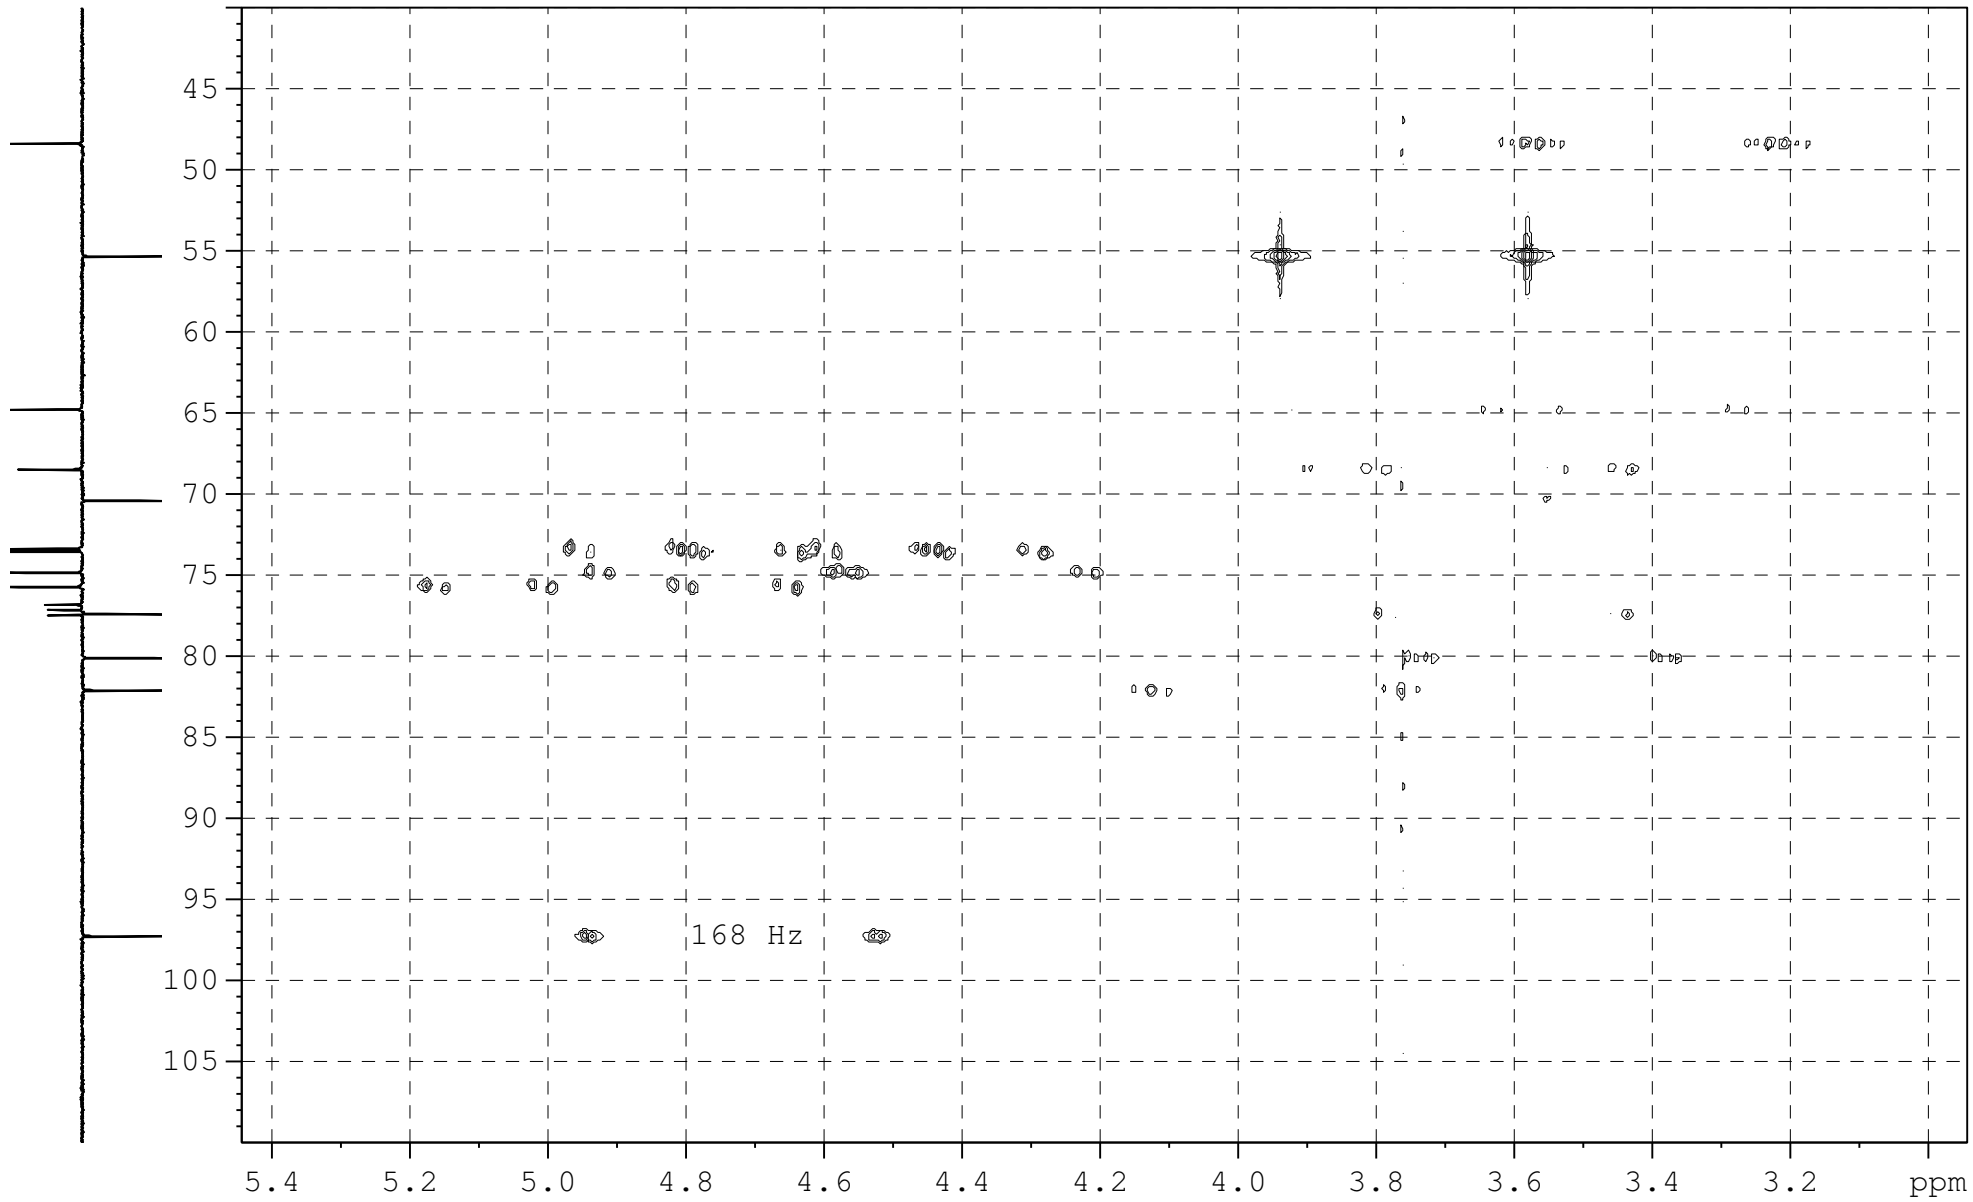

45

50

55

60

65

70

75

80

85

90

95

100

105

5.4

5.2

5.0

4.8

4.6

4.4

4.2

4.0

3.8

3.6

3.4

3.2

ppm

S134

168 Hz

<sup>1</sup>H-NMR, <sup>13</sup>C-APT, <sup>1</sup>H-<sup>1</sup>H COSY, HSQC of **28**

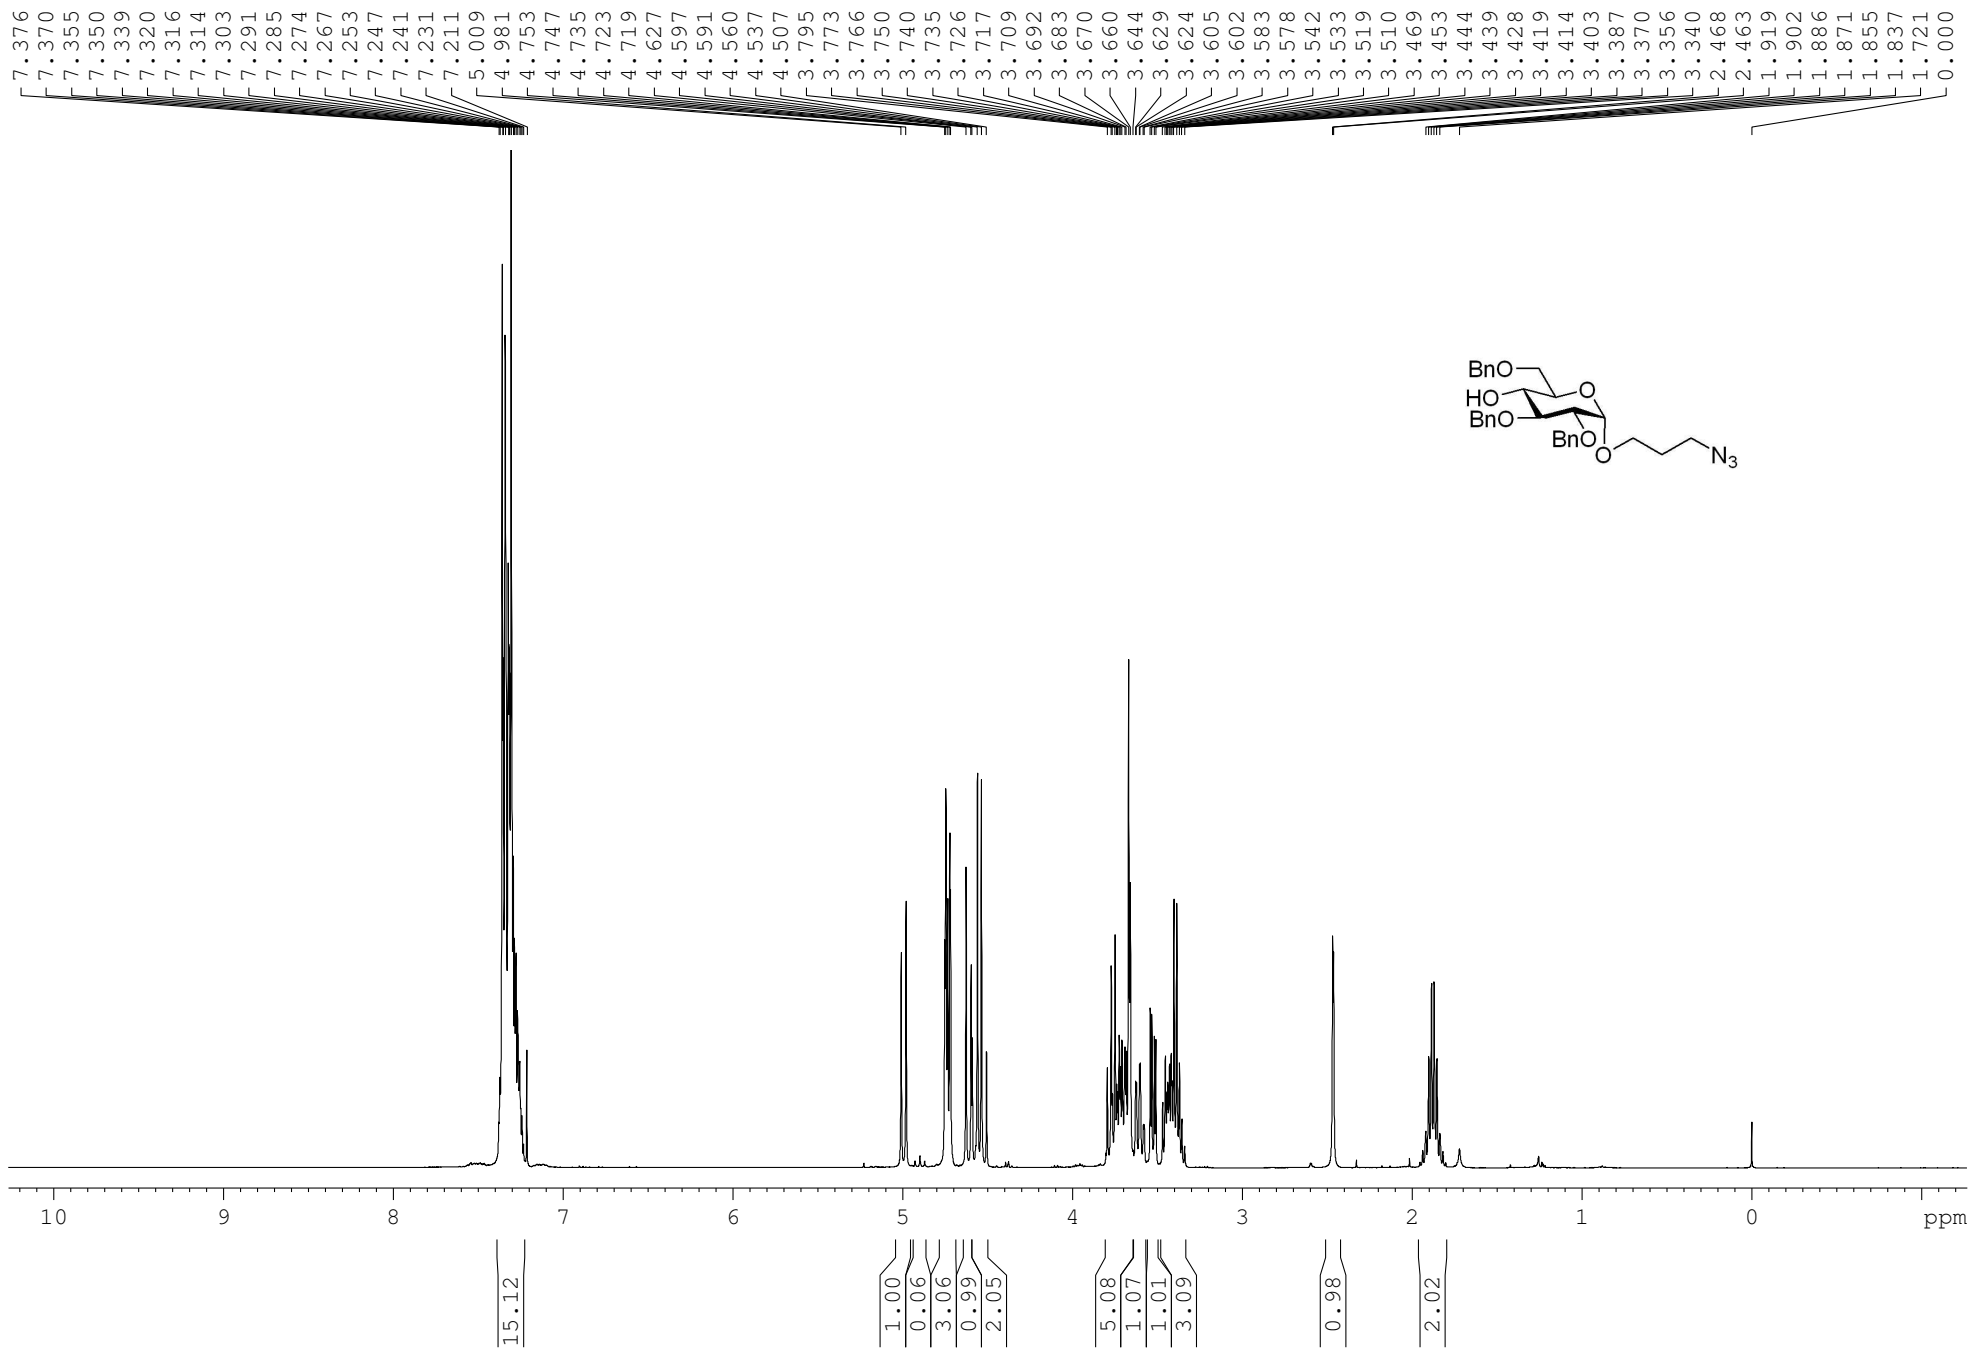

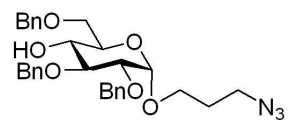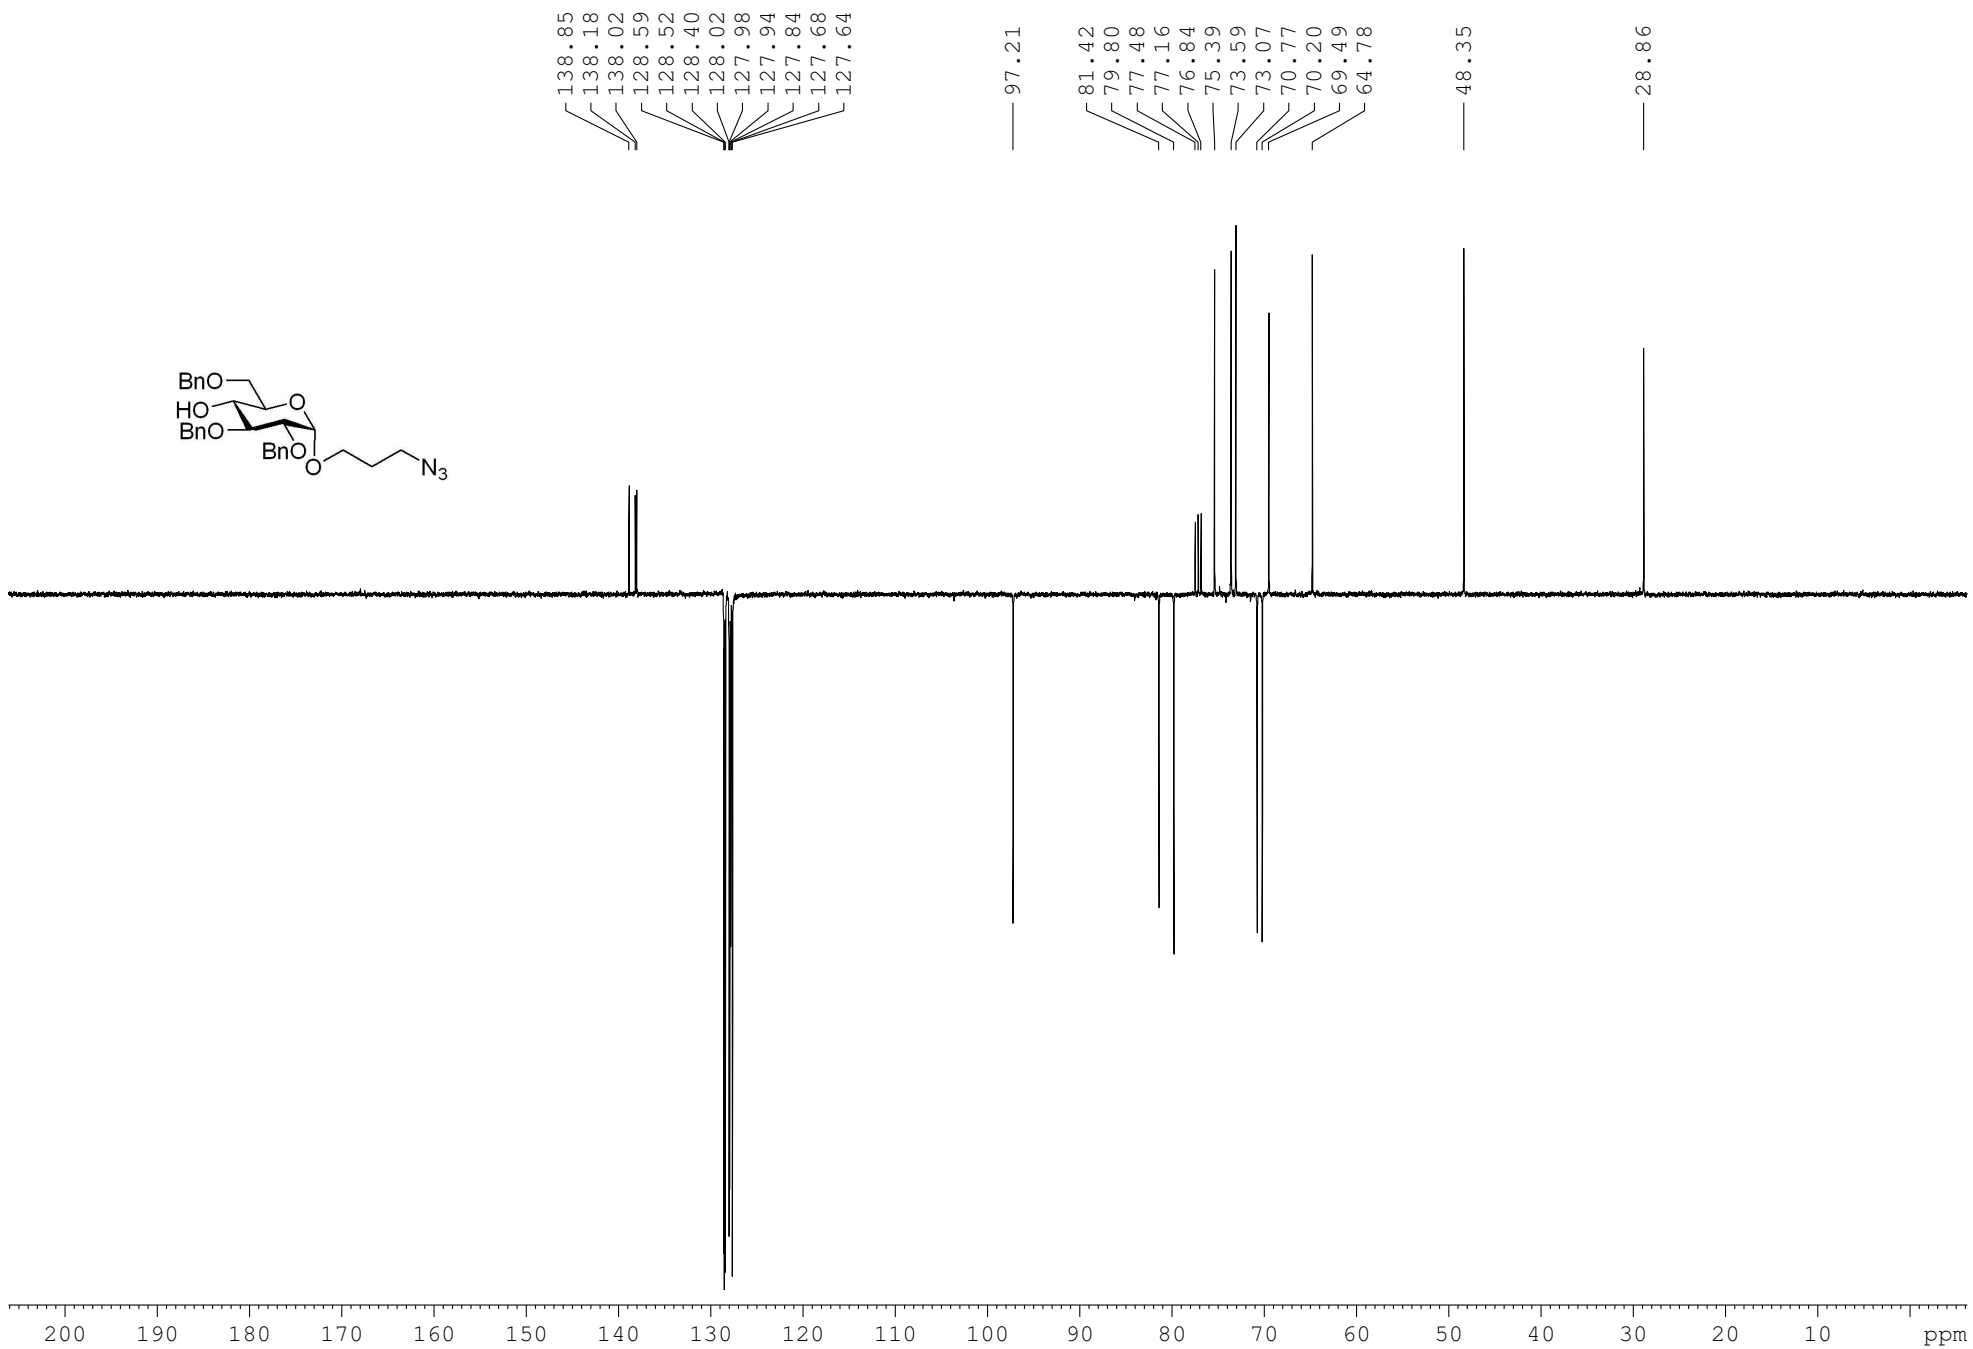

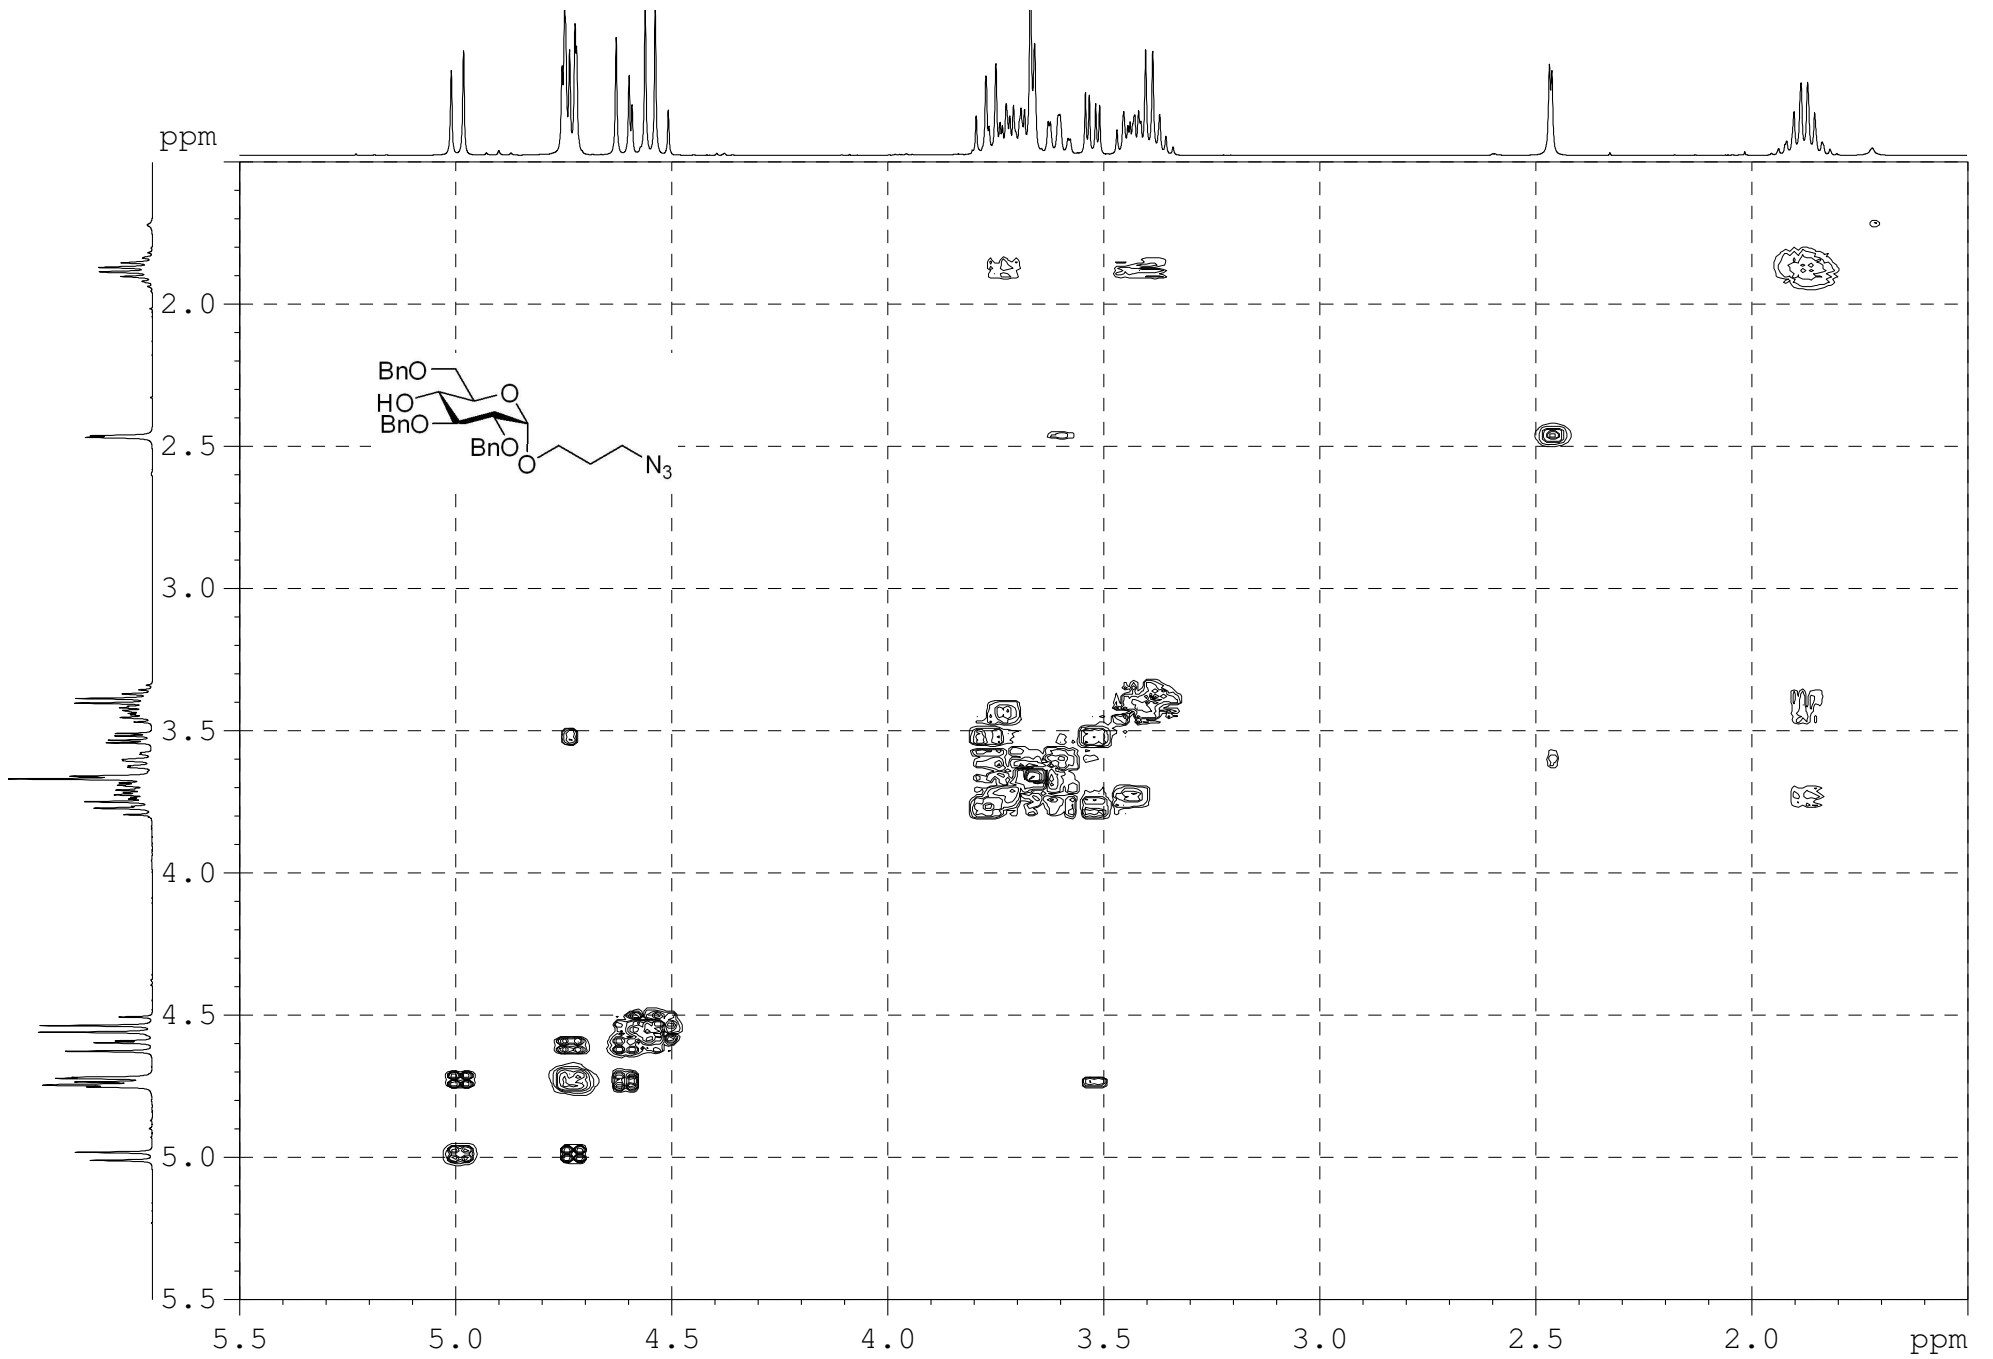

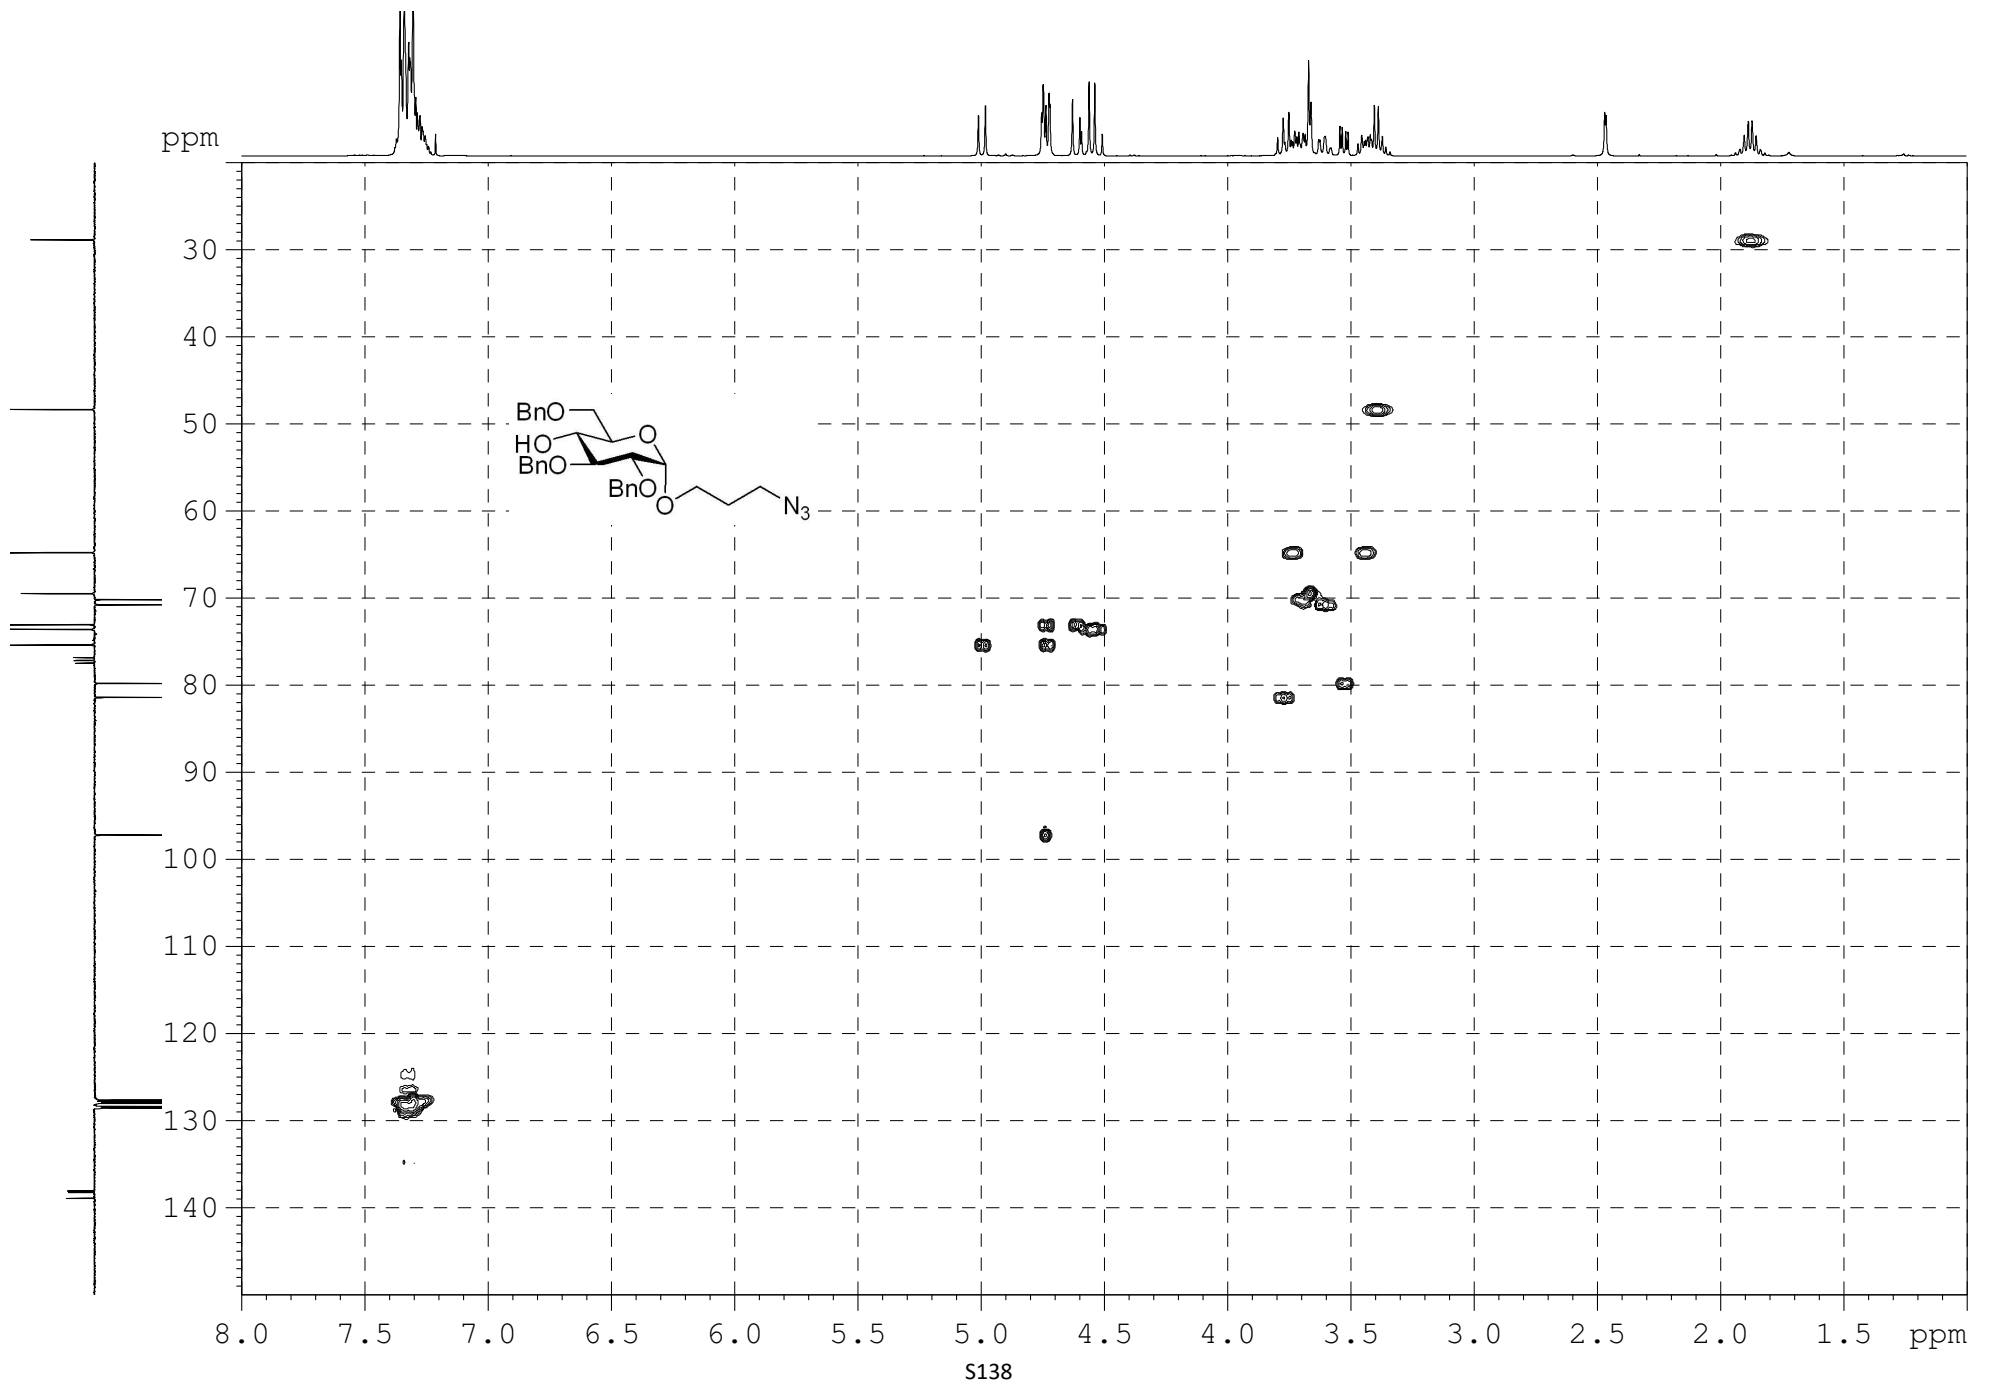

<sup>1</sup>H-NMR, <sup>13</sup>C-APT, <sup>1</sup>H-<sup>1</sup>H COSY, HSQC, HMBC of **29**

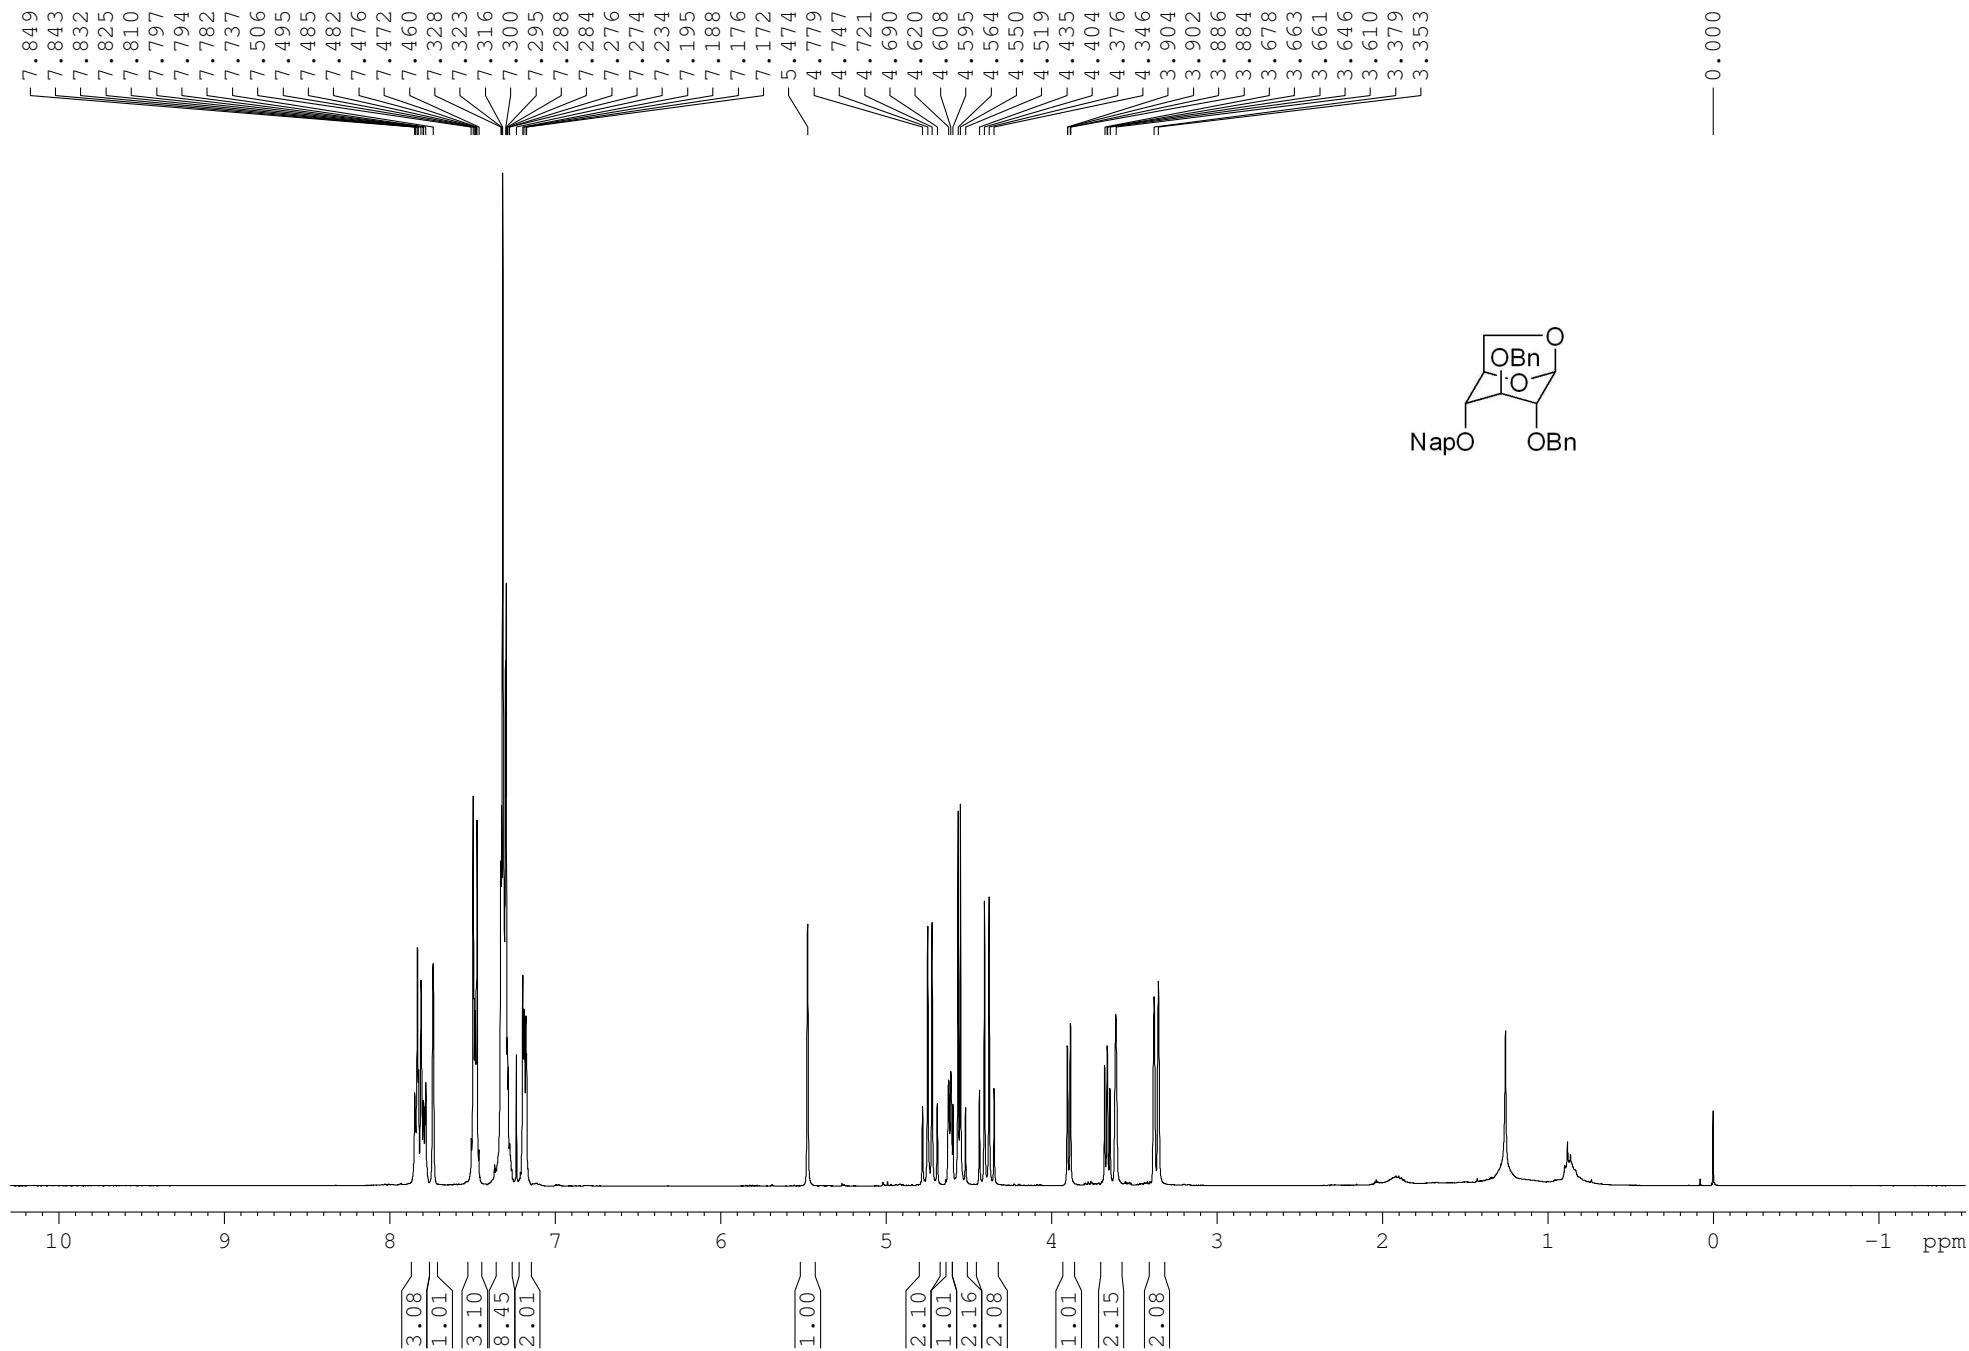

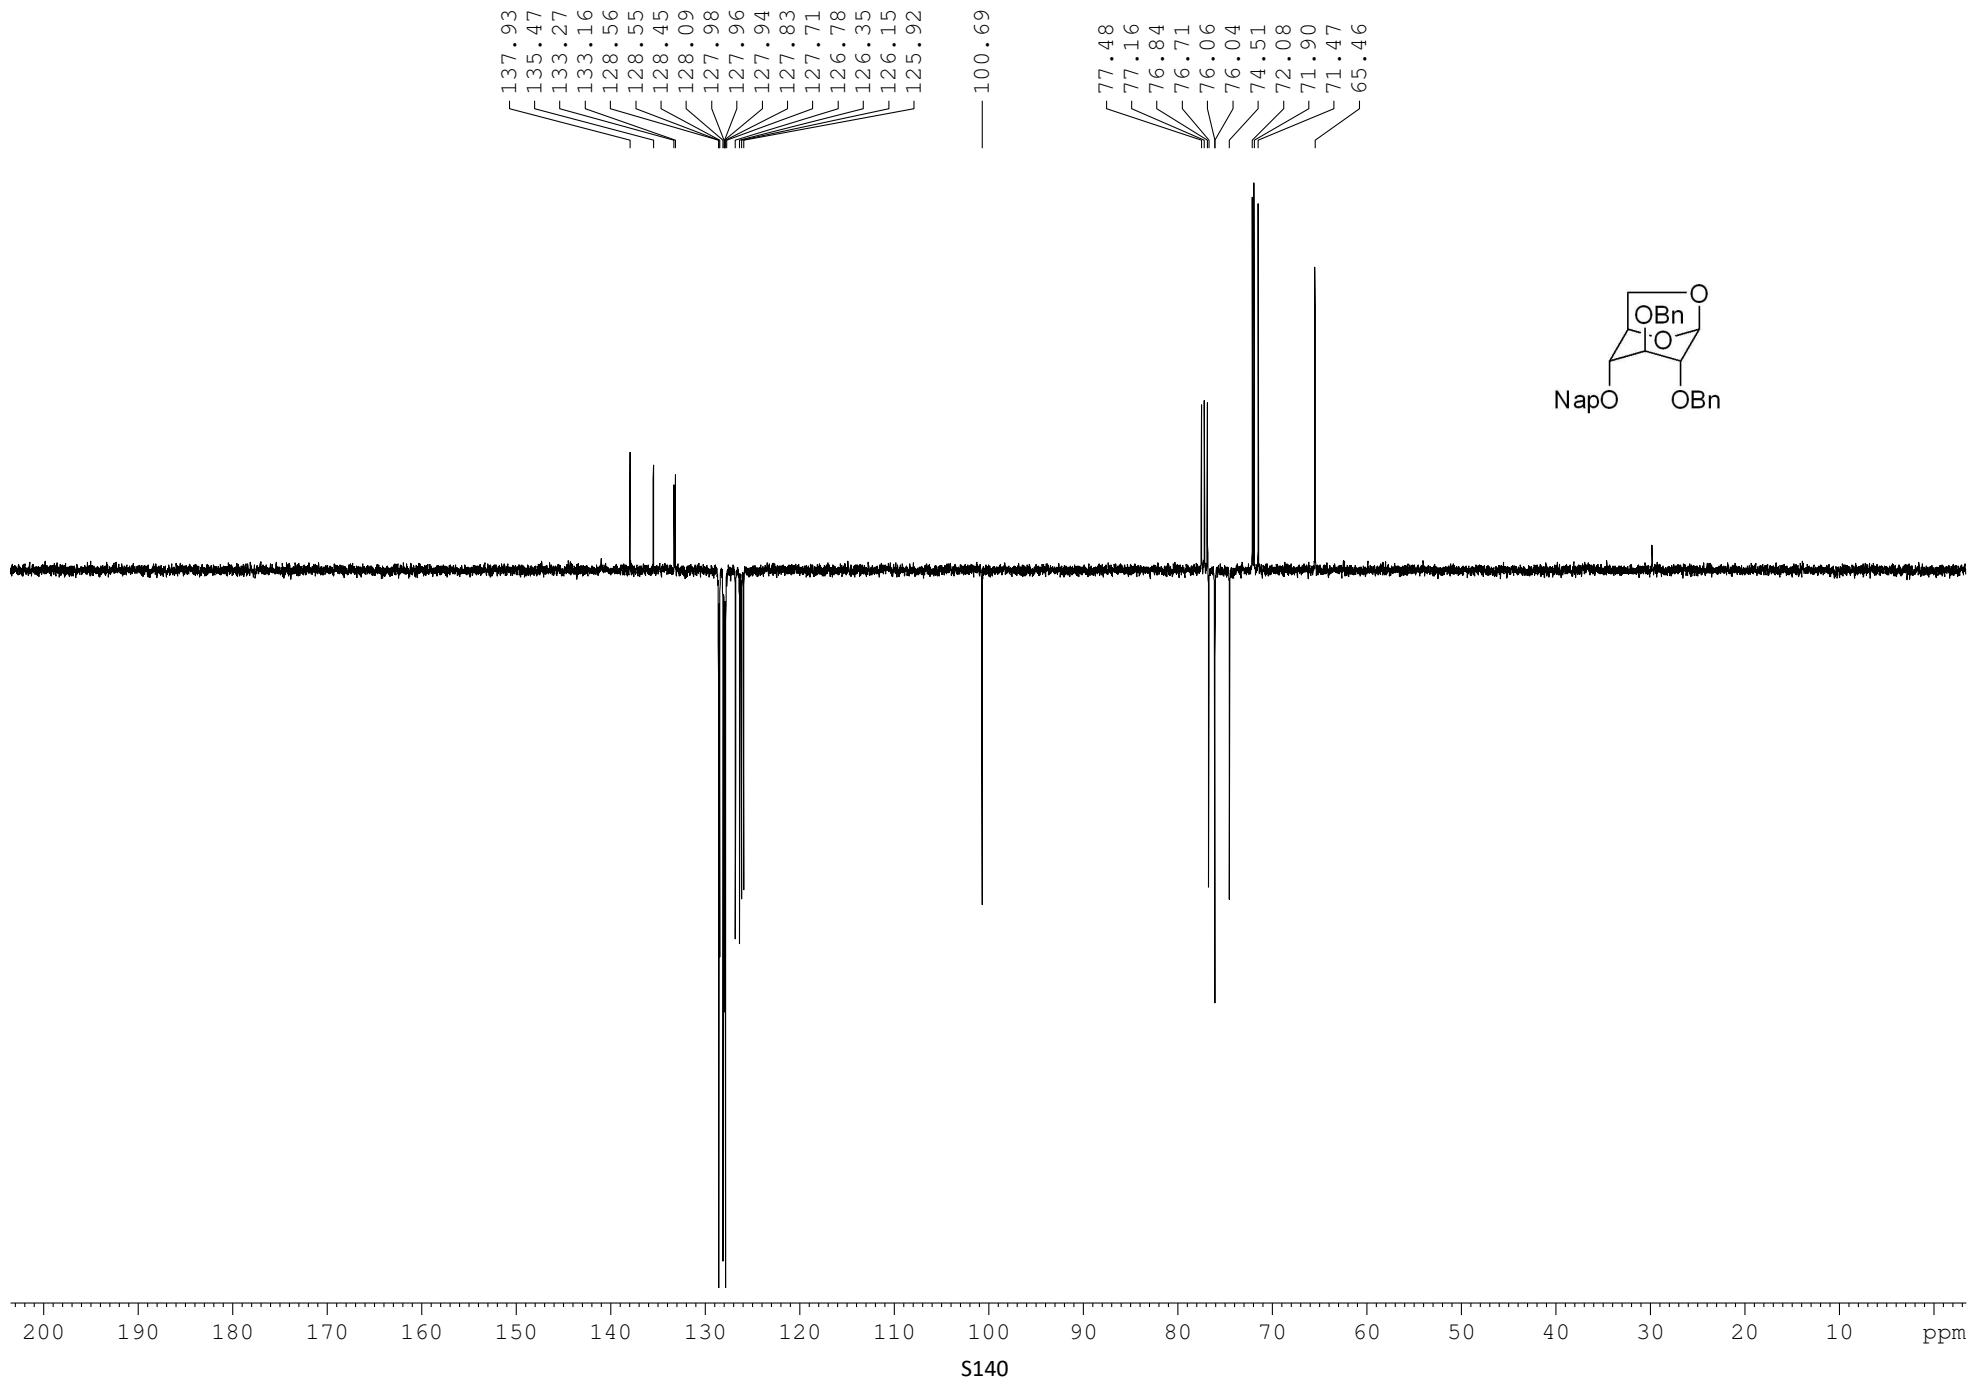



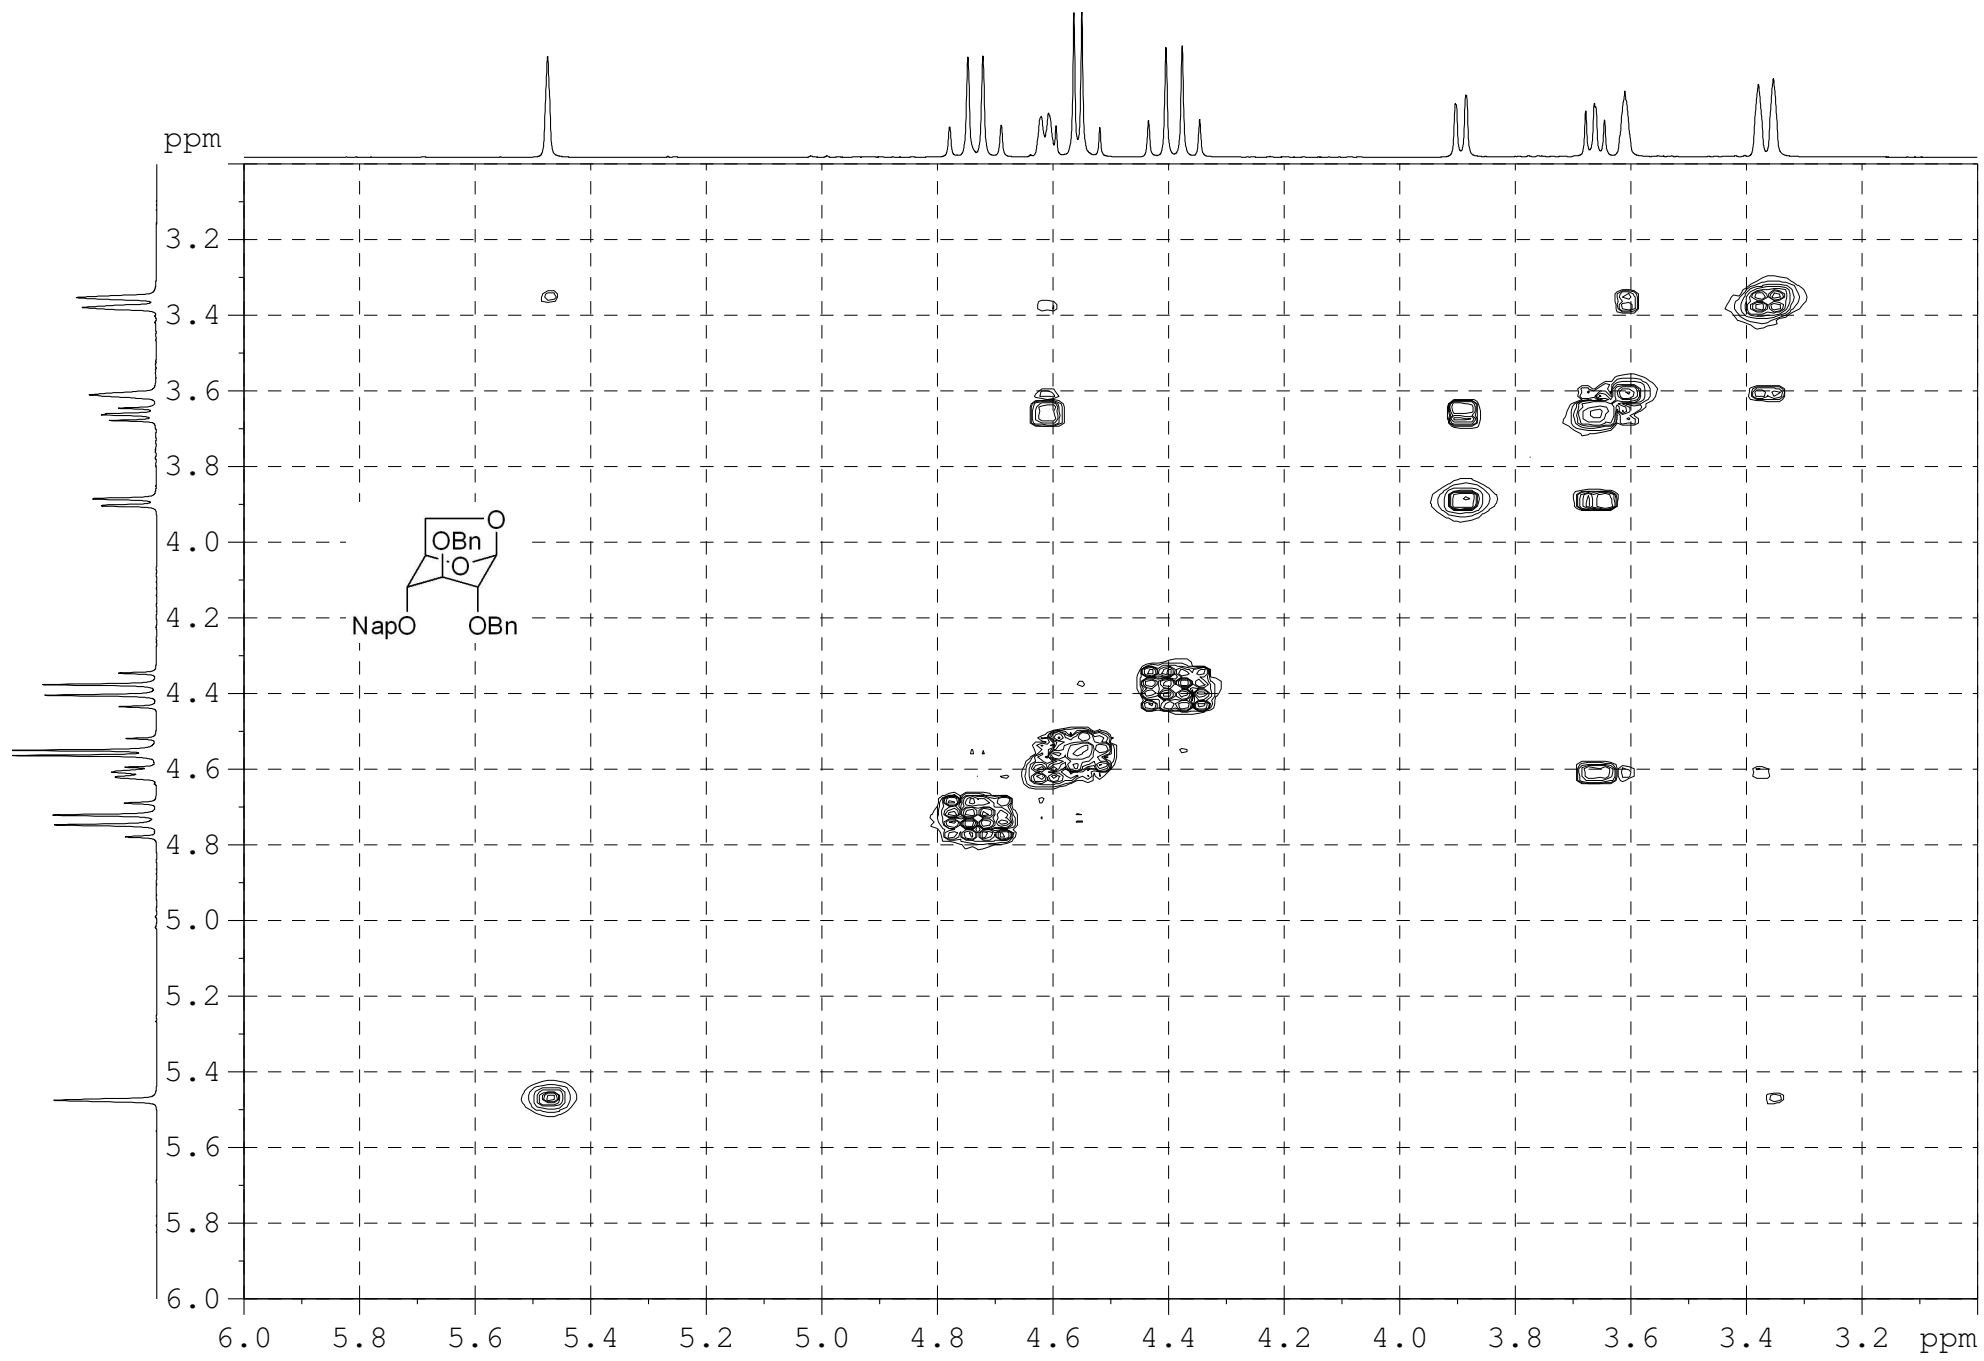

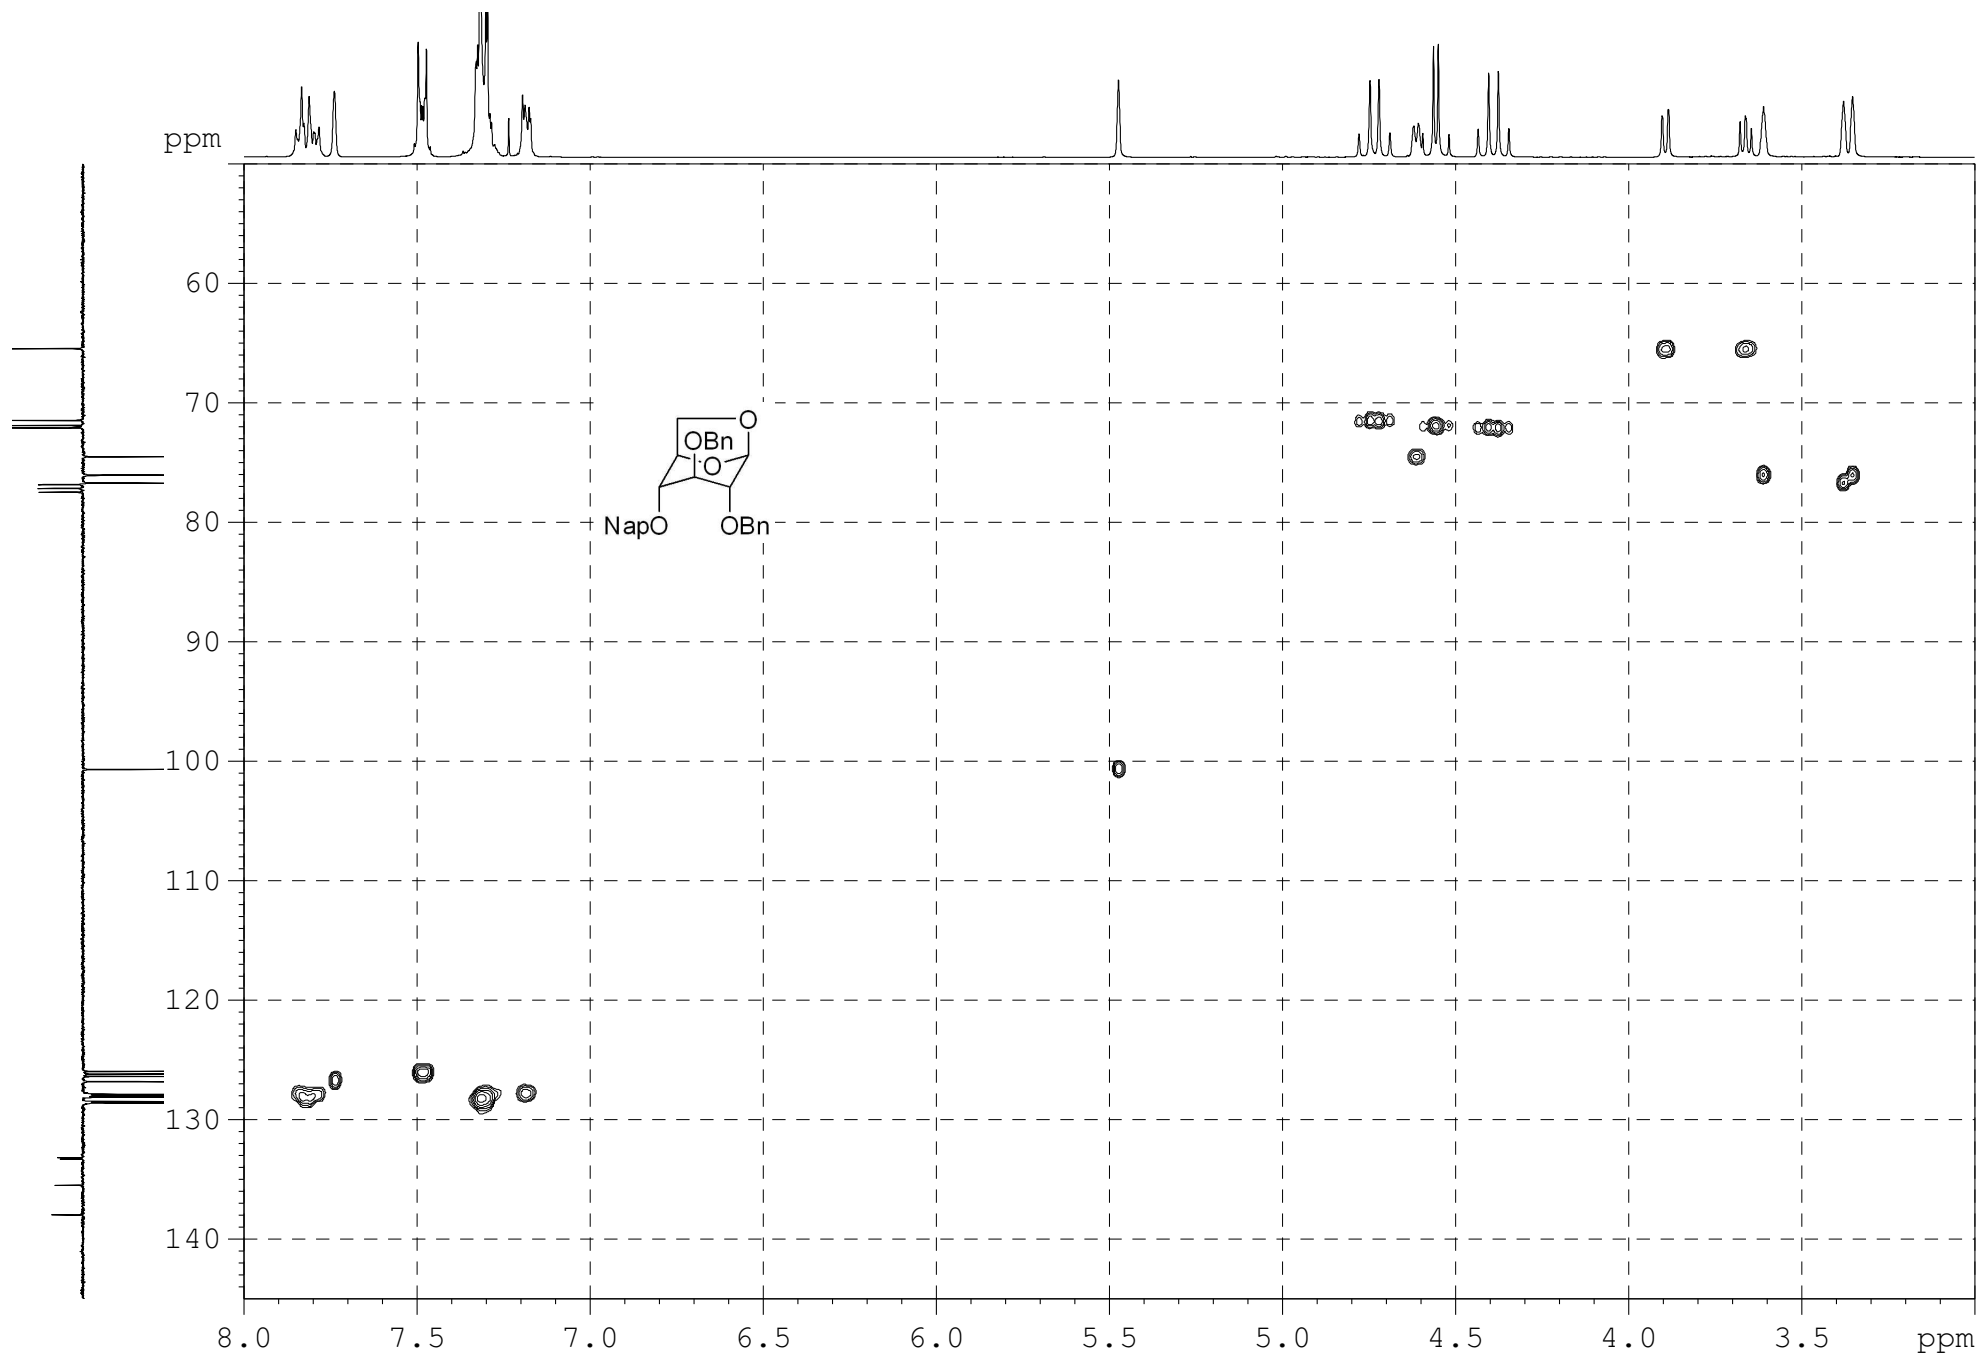

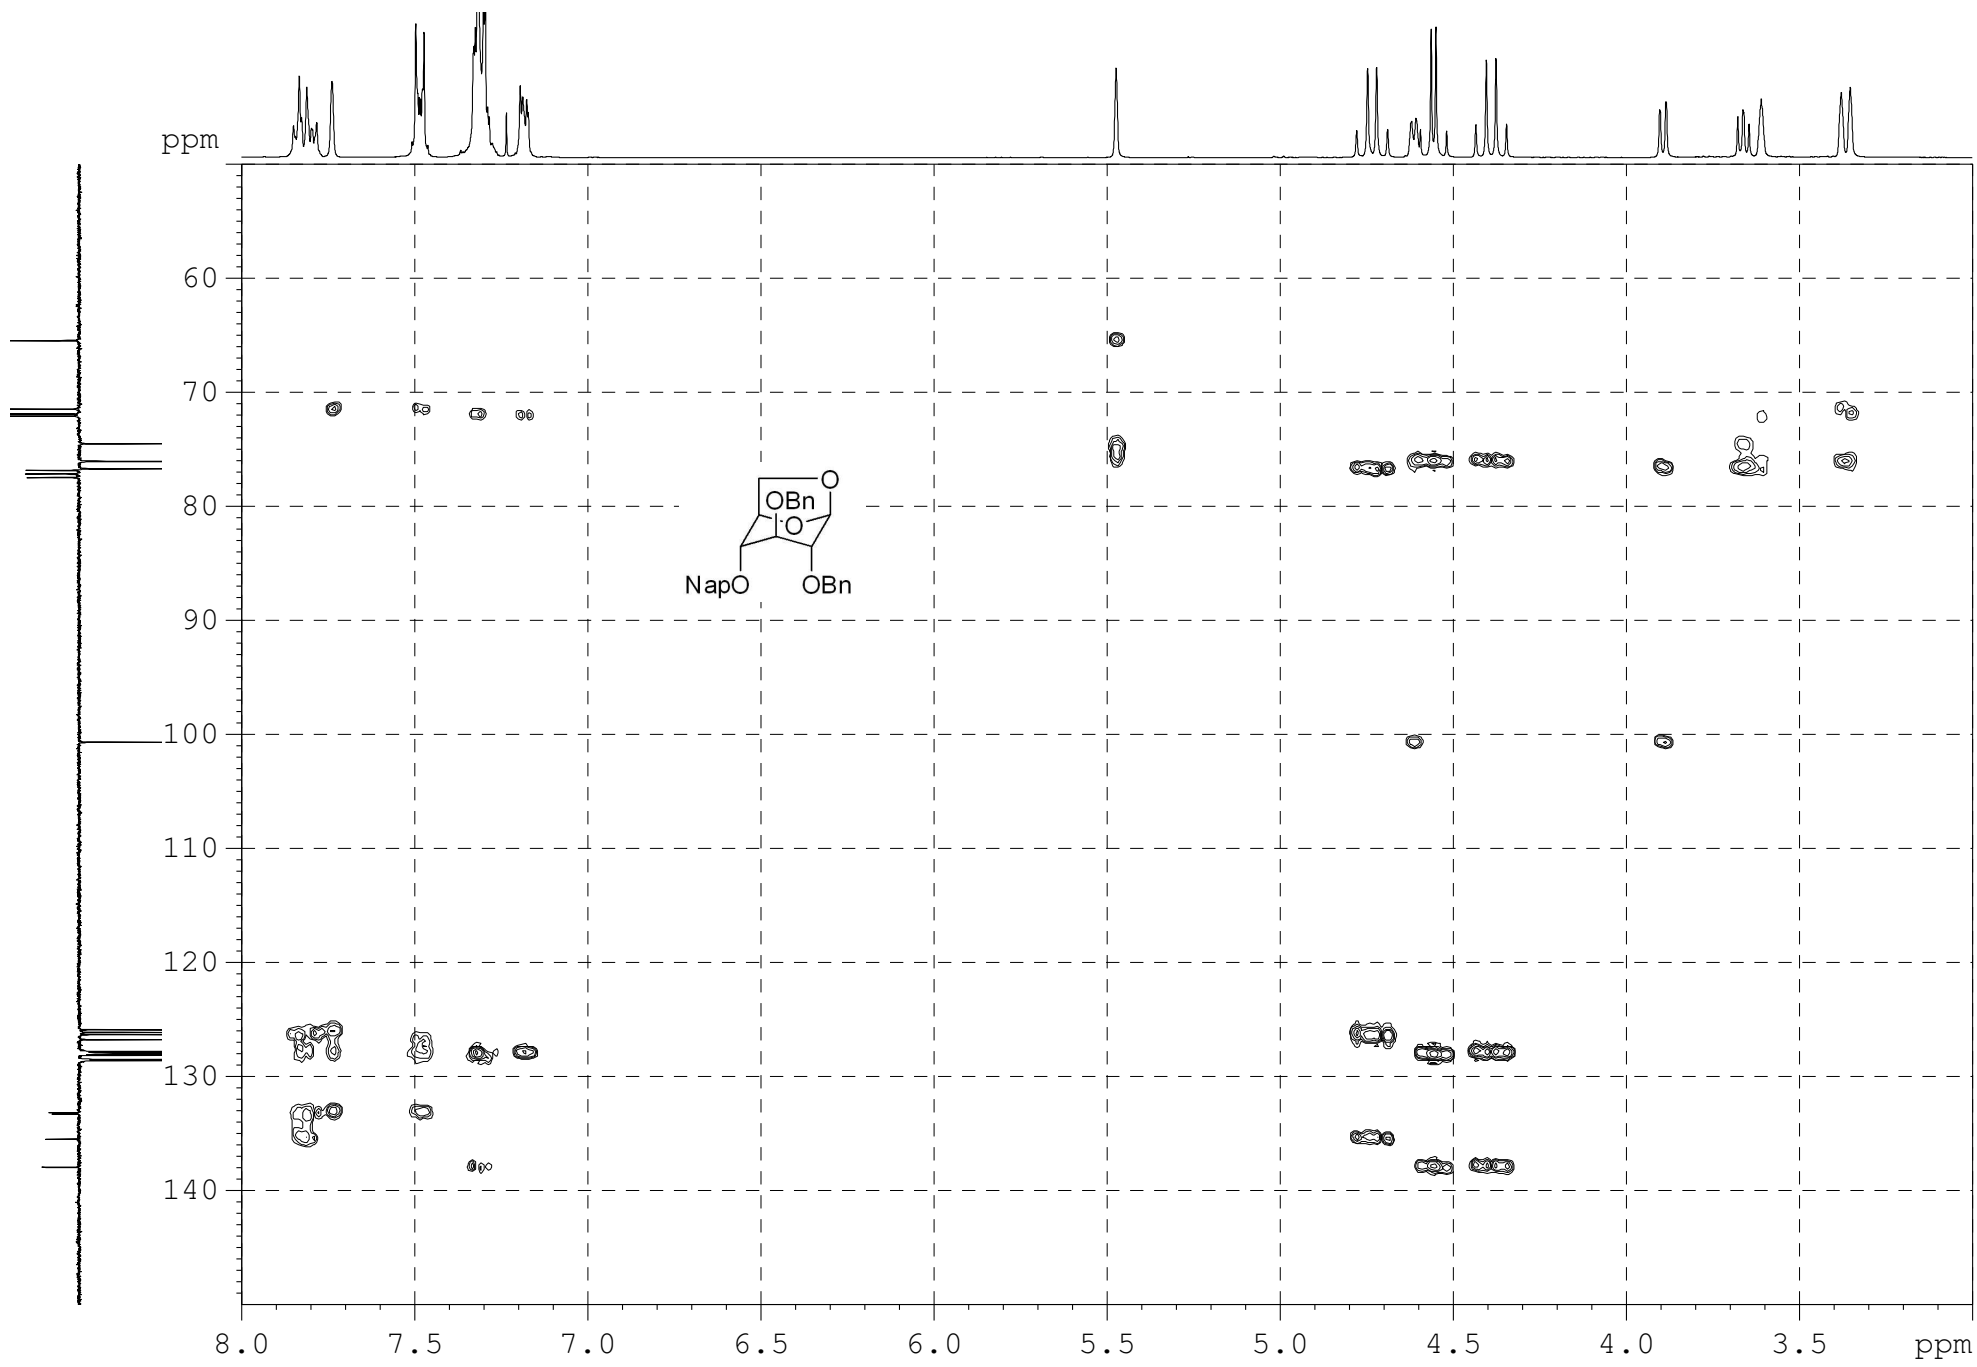

<sup>1</sup>H-NMR, <sup>13</sup>C-APT, <sup>1</sup>H-<sup>1</sup>H COSY, HSQC, HMBC, GATED of **30**

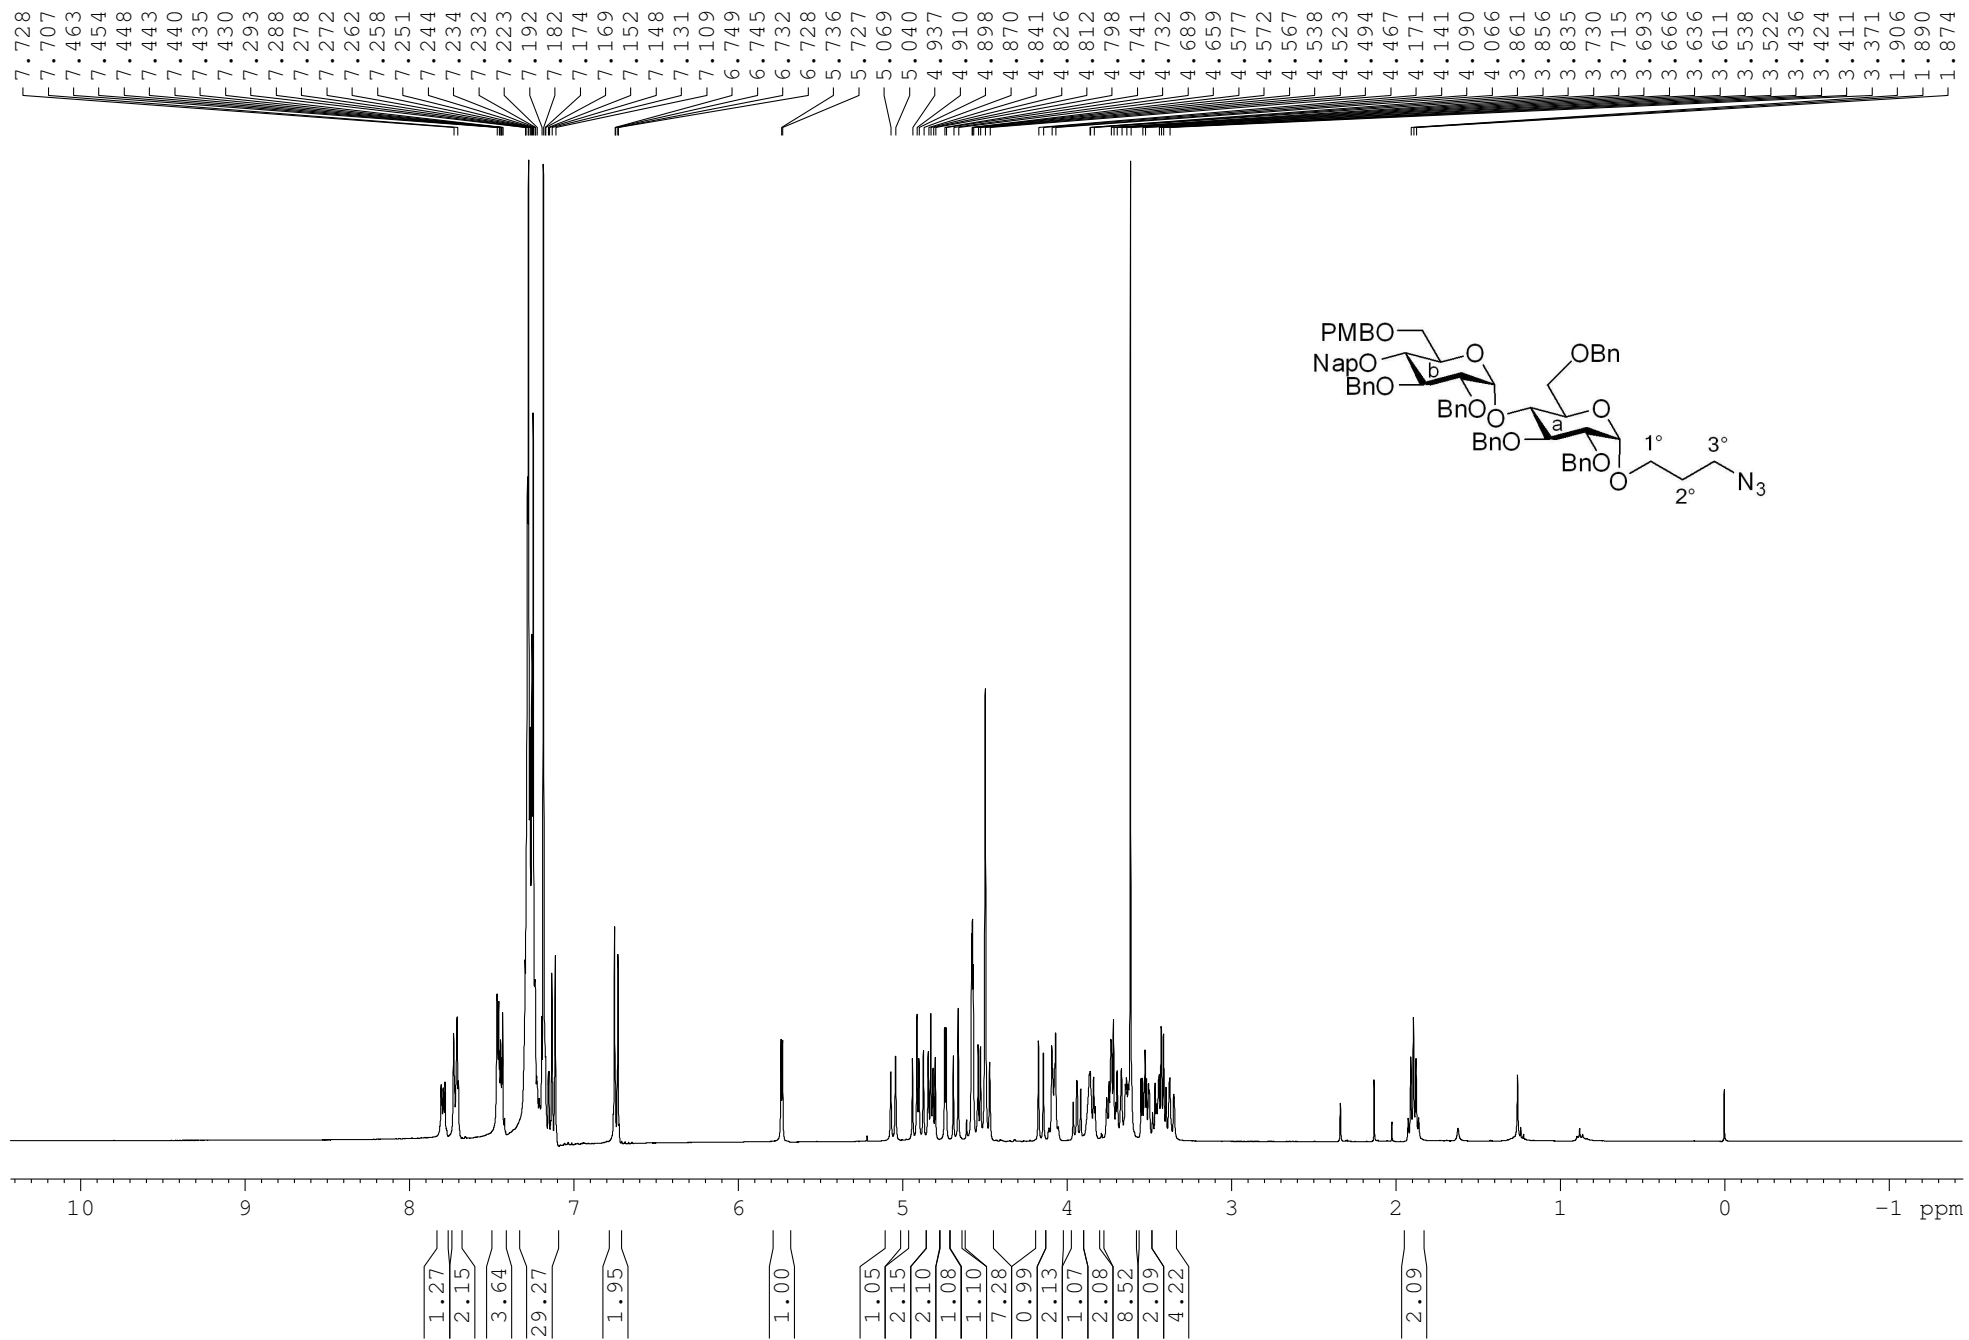

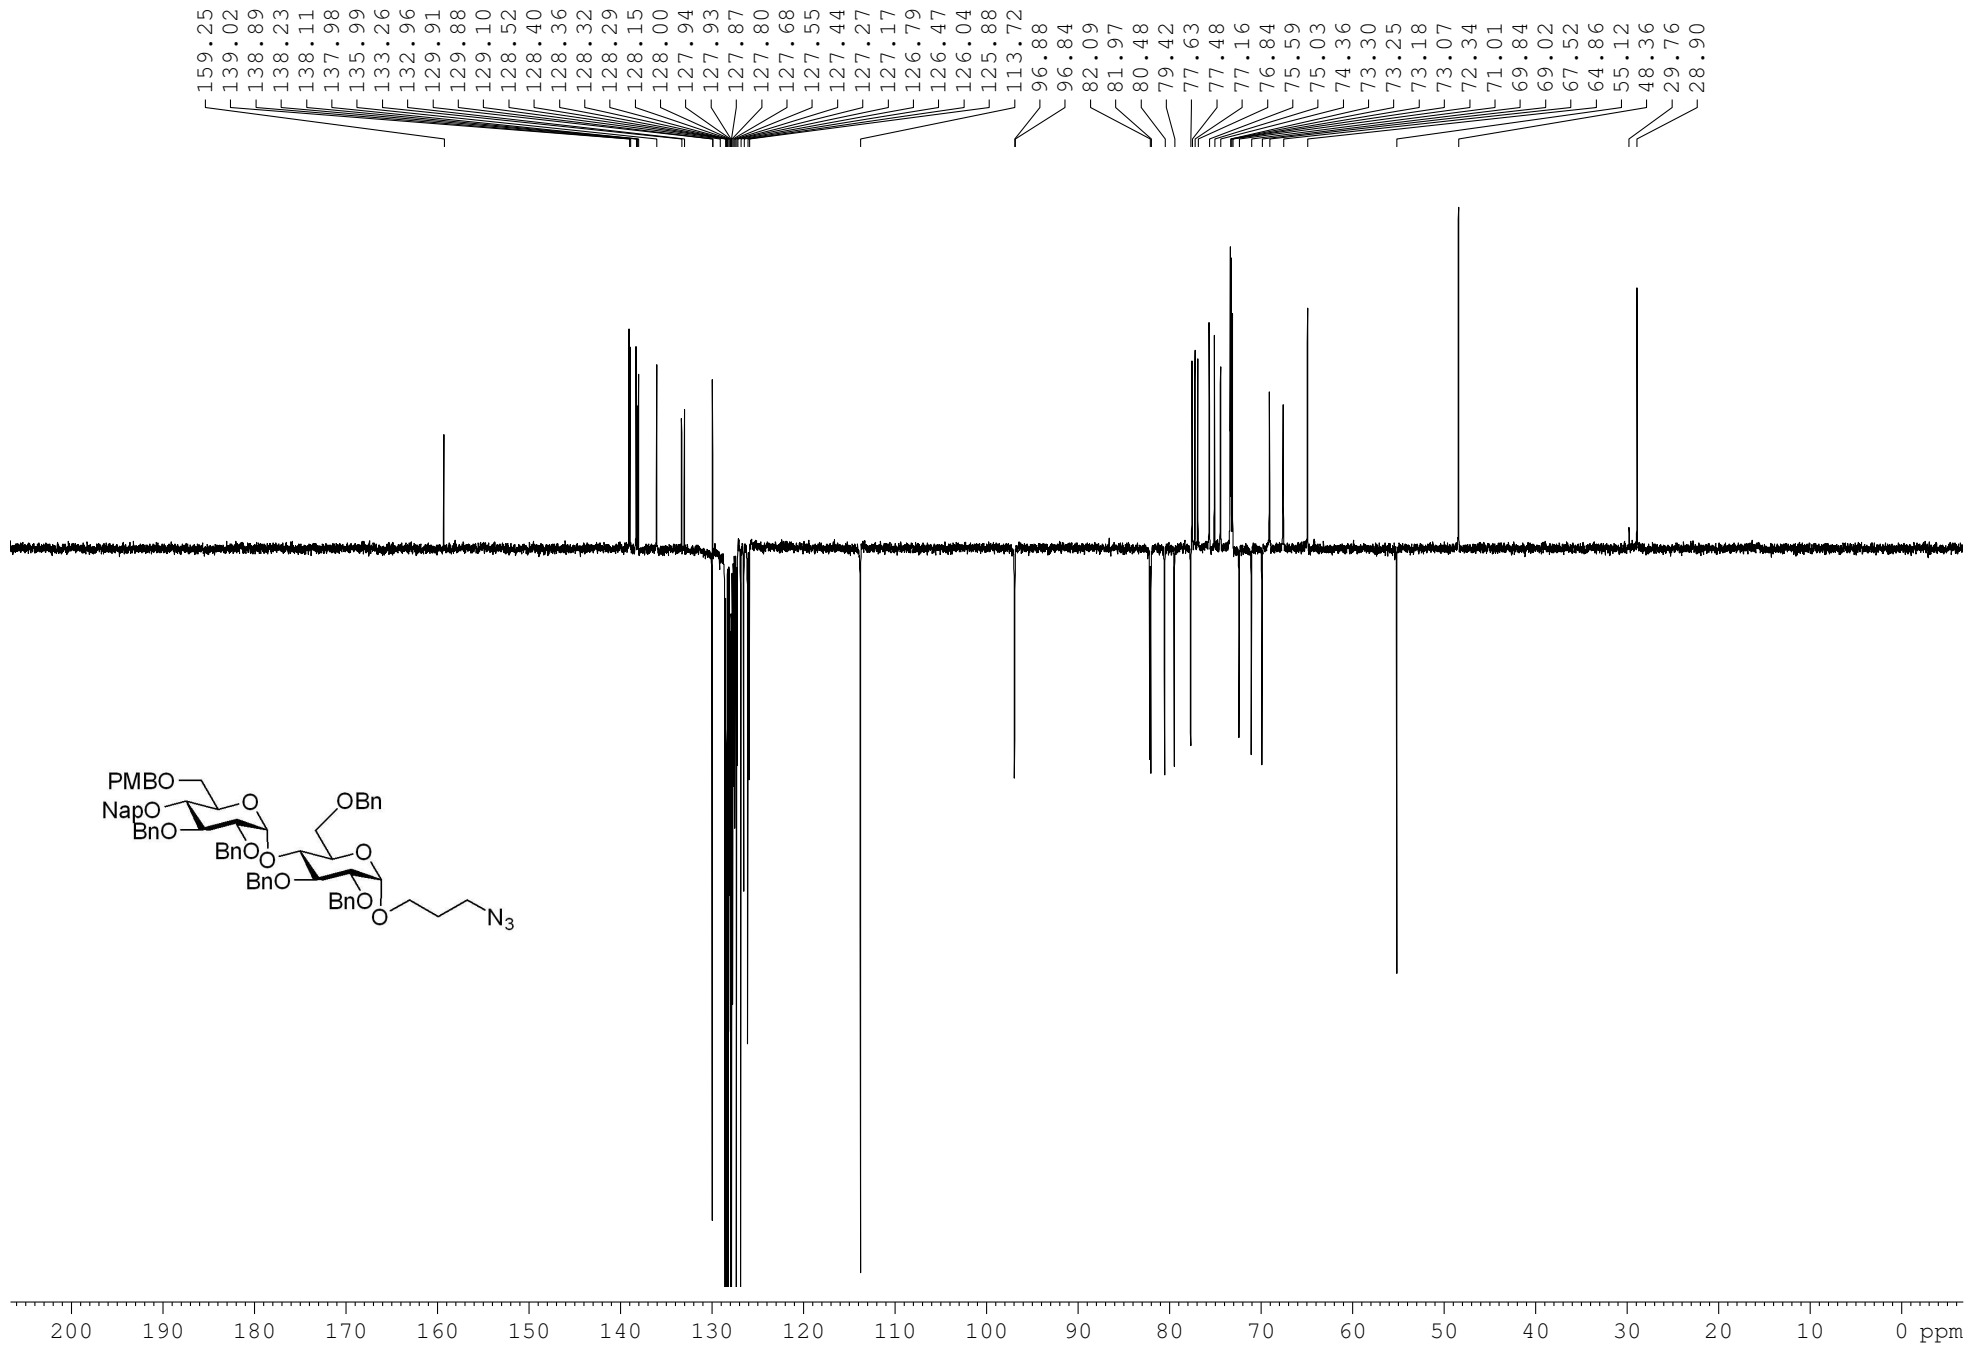

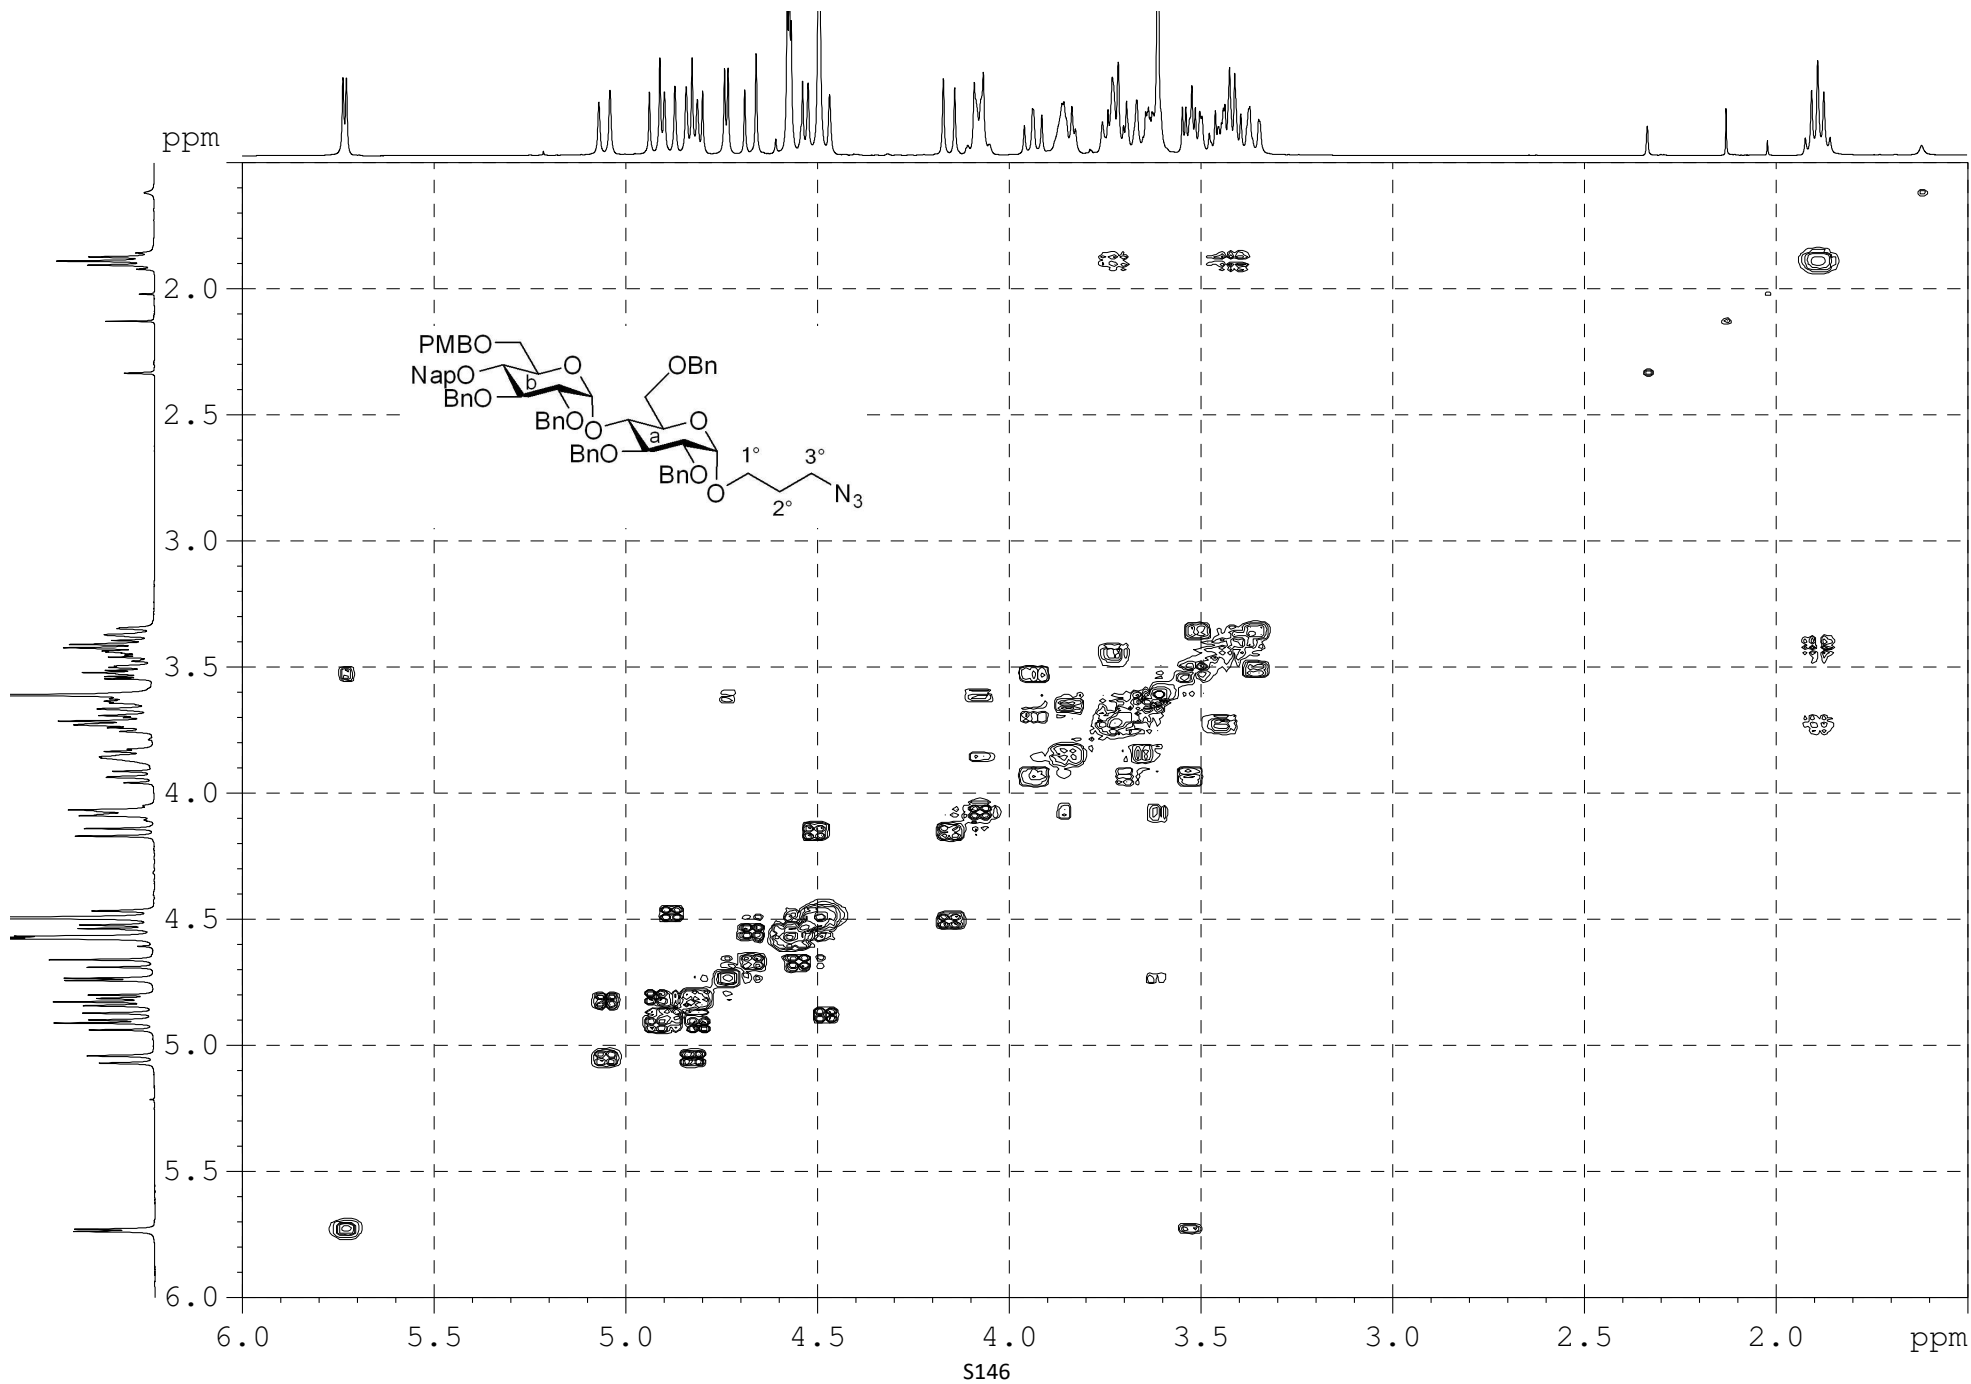

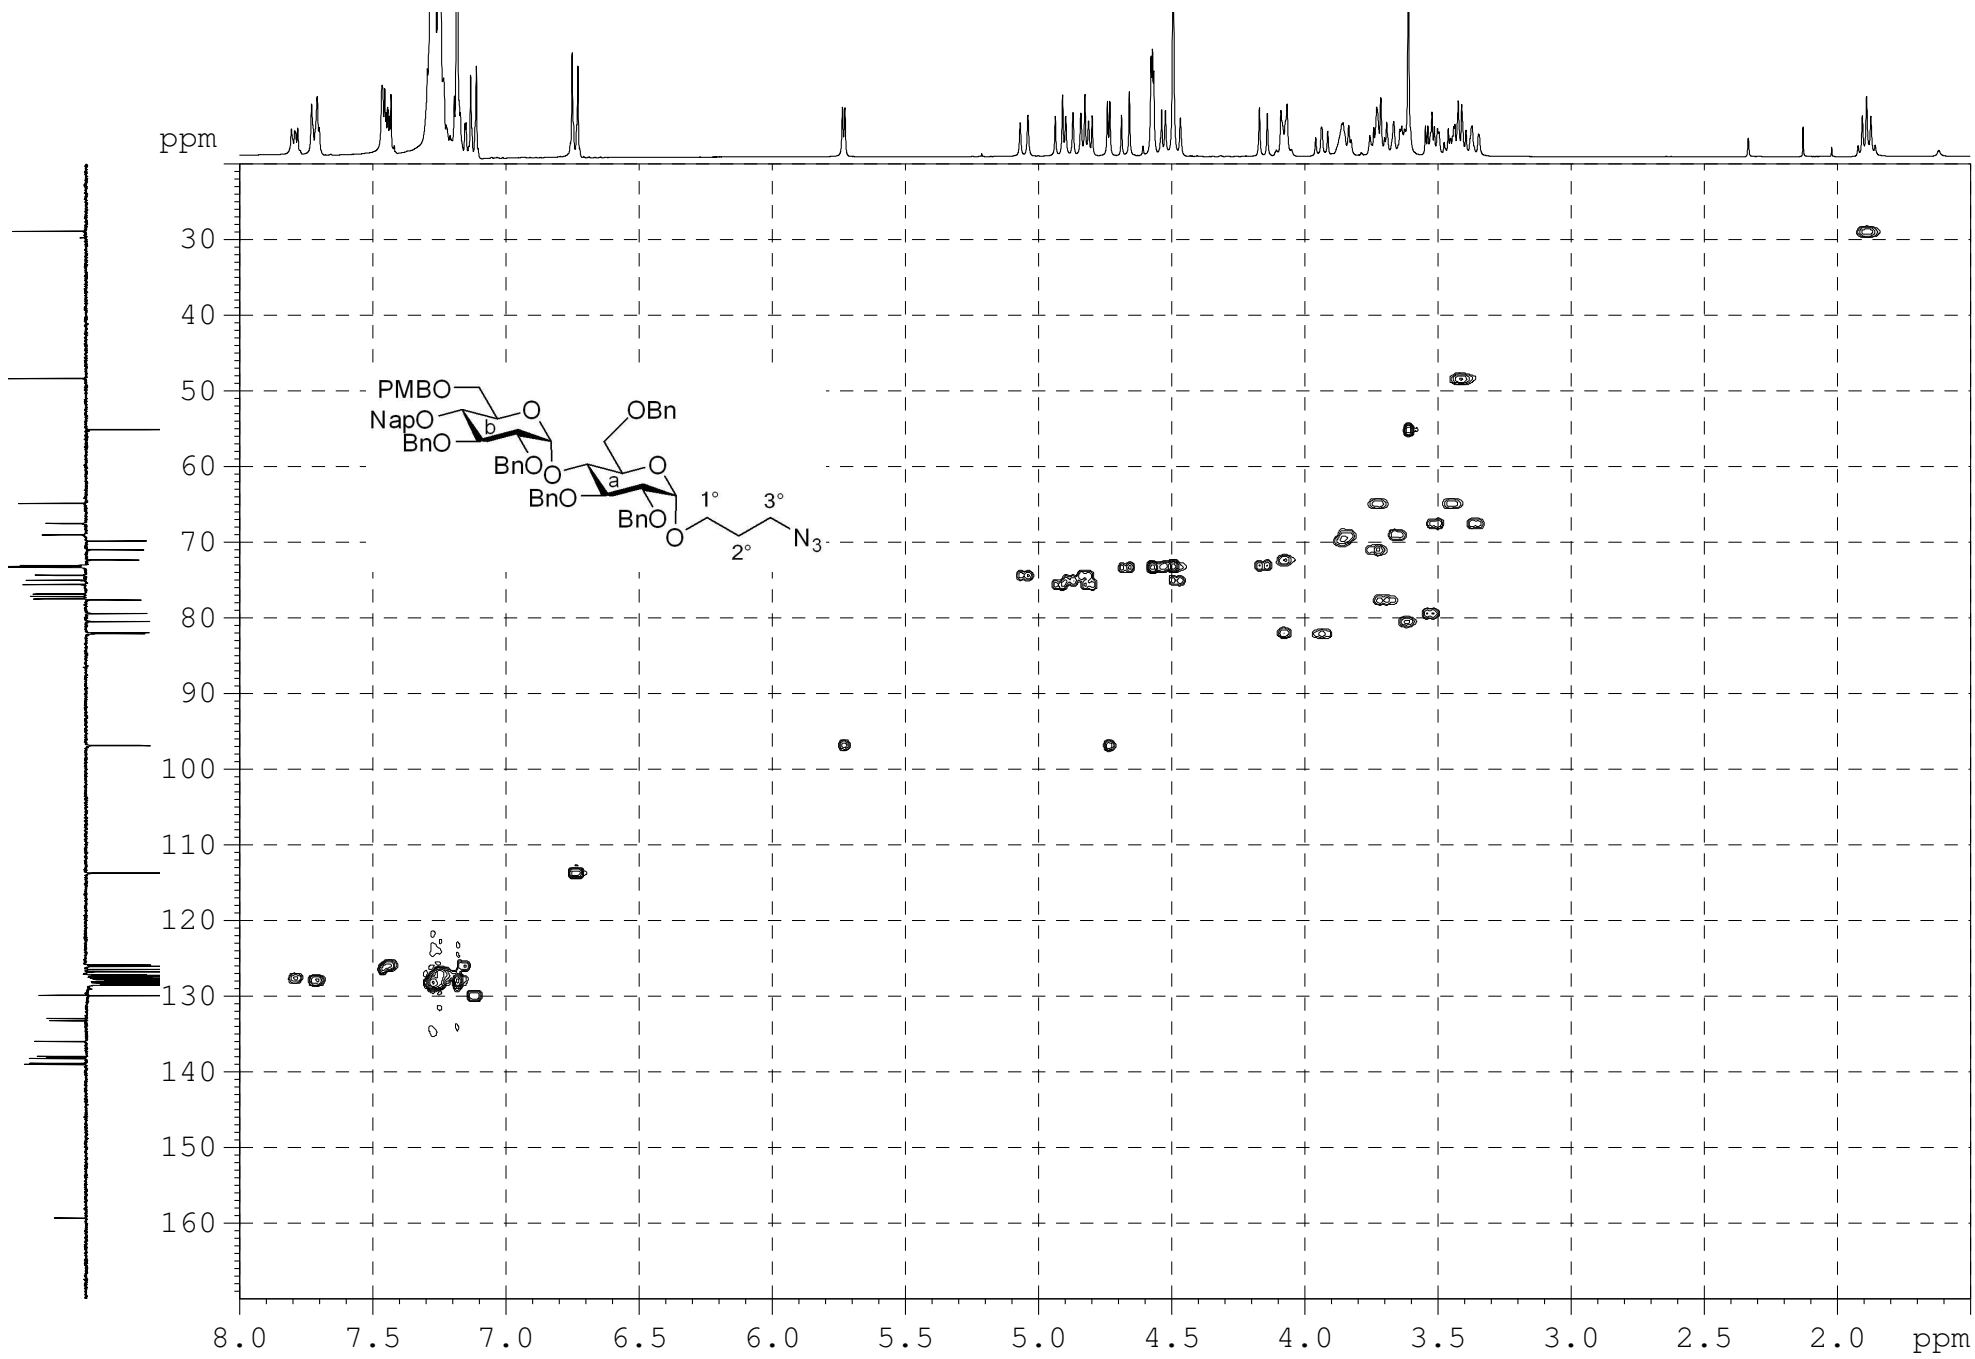

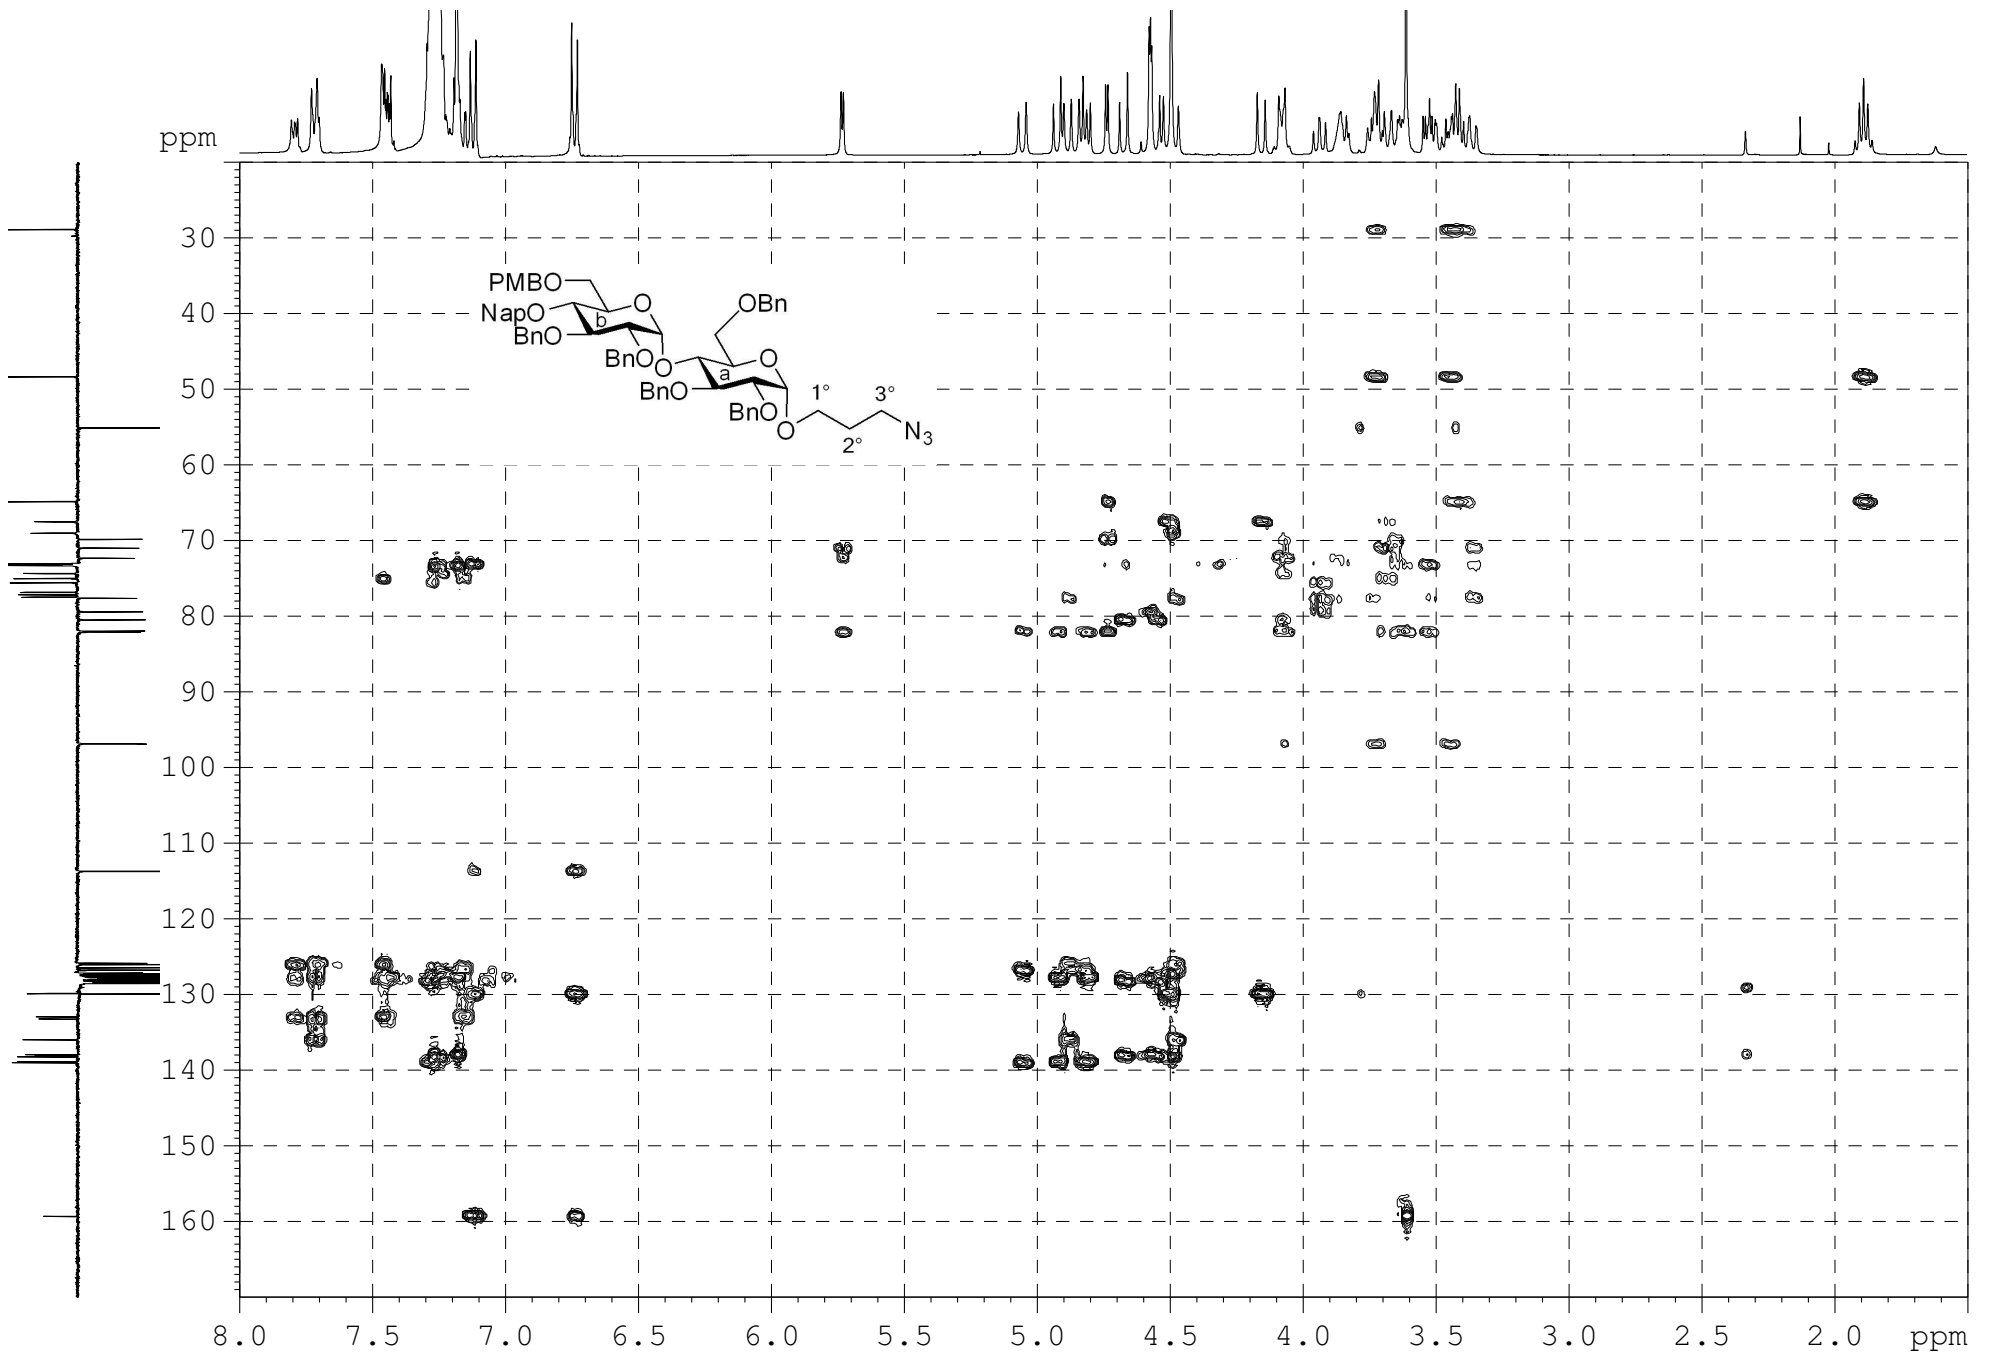



ppm

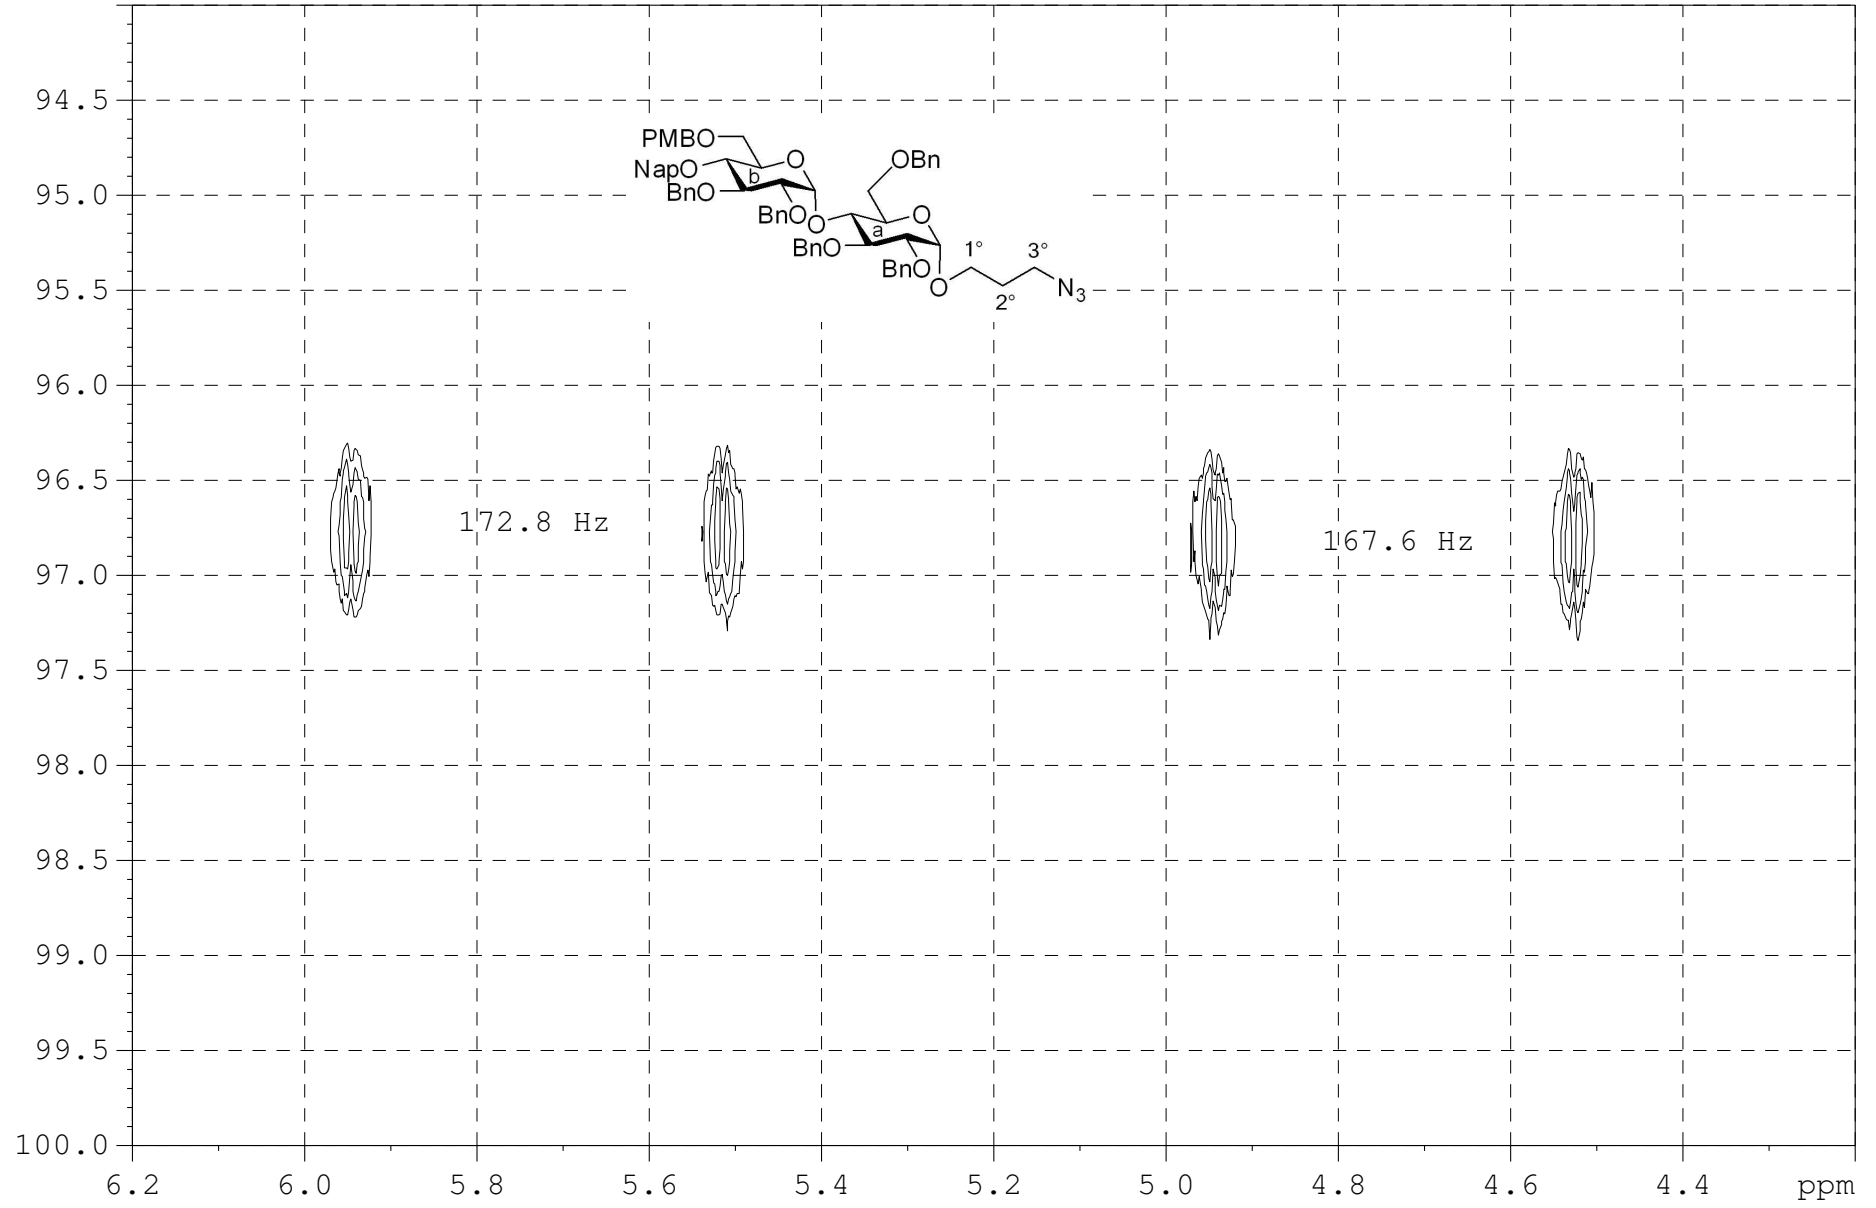

S149

<sup>1</sup>H-NMR, <sup>13</sup>C-APT, <sup>1</sup>H-<sup>1</sup>H COSY, HSQC, HMBC of **31**

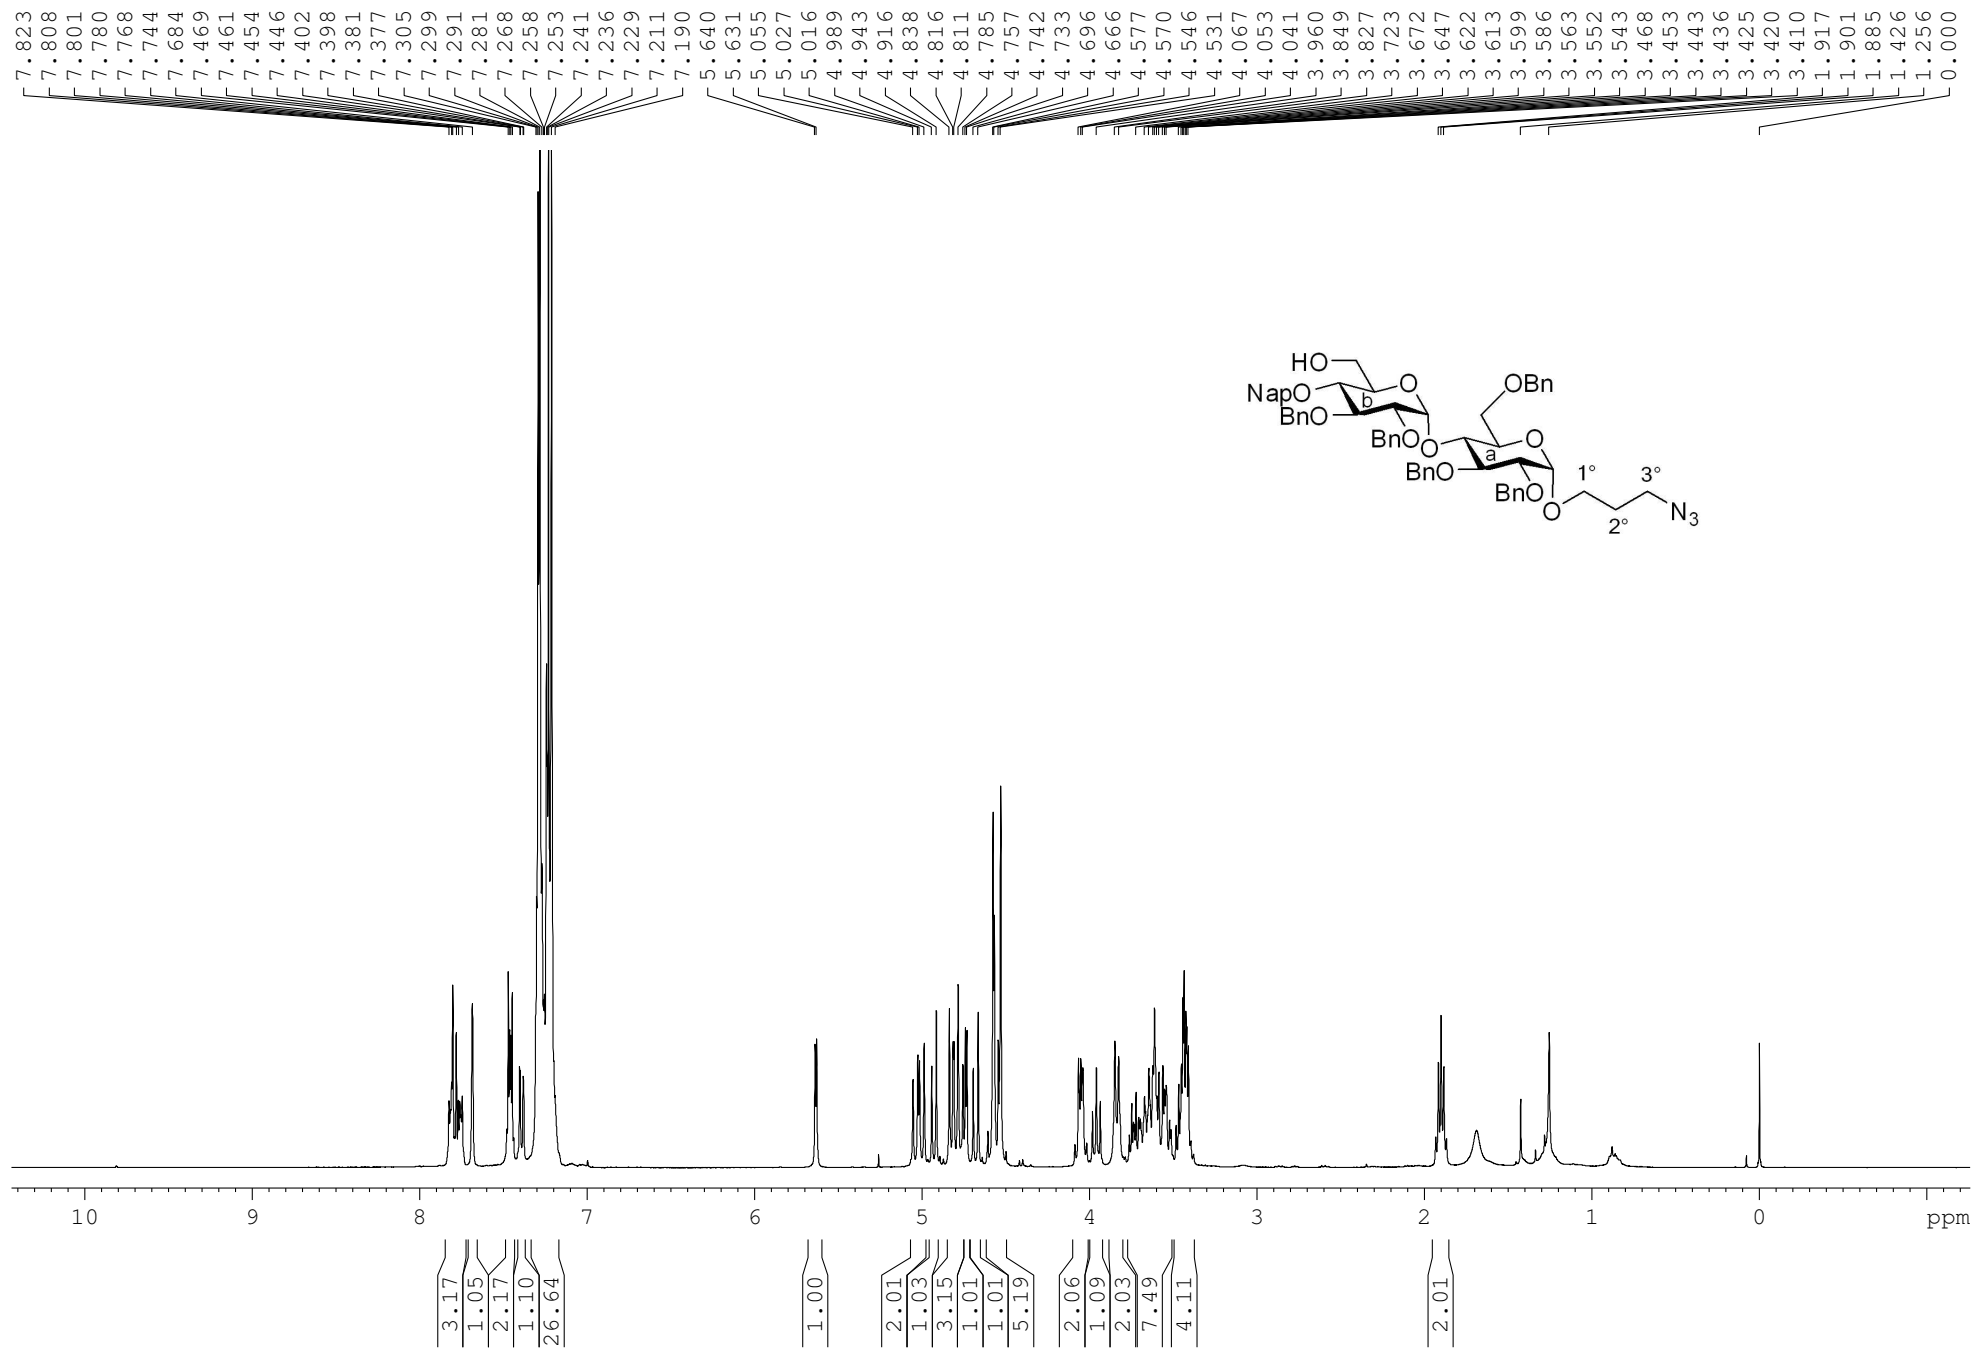

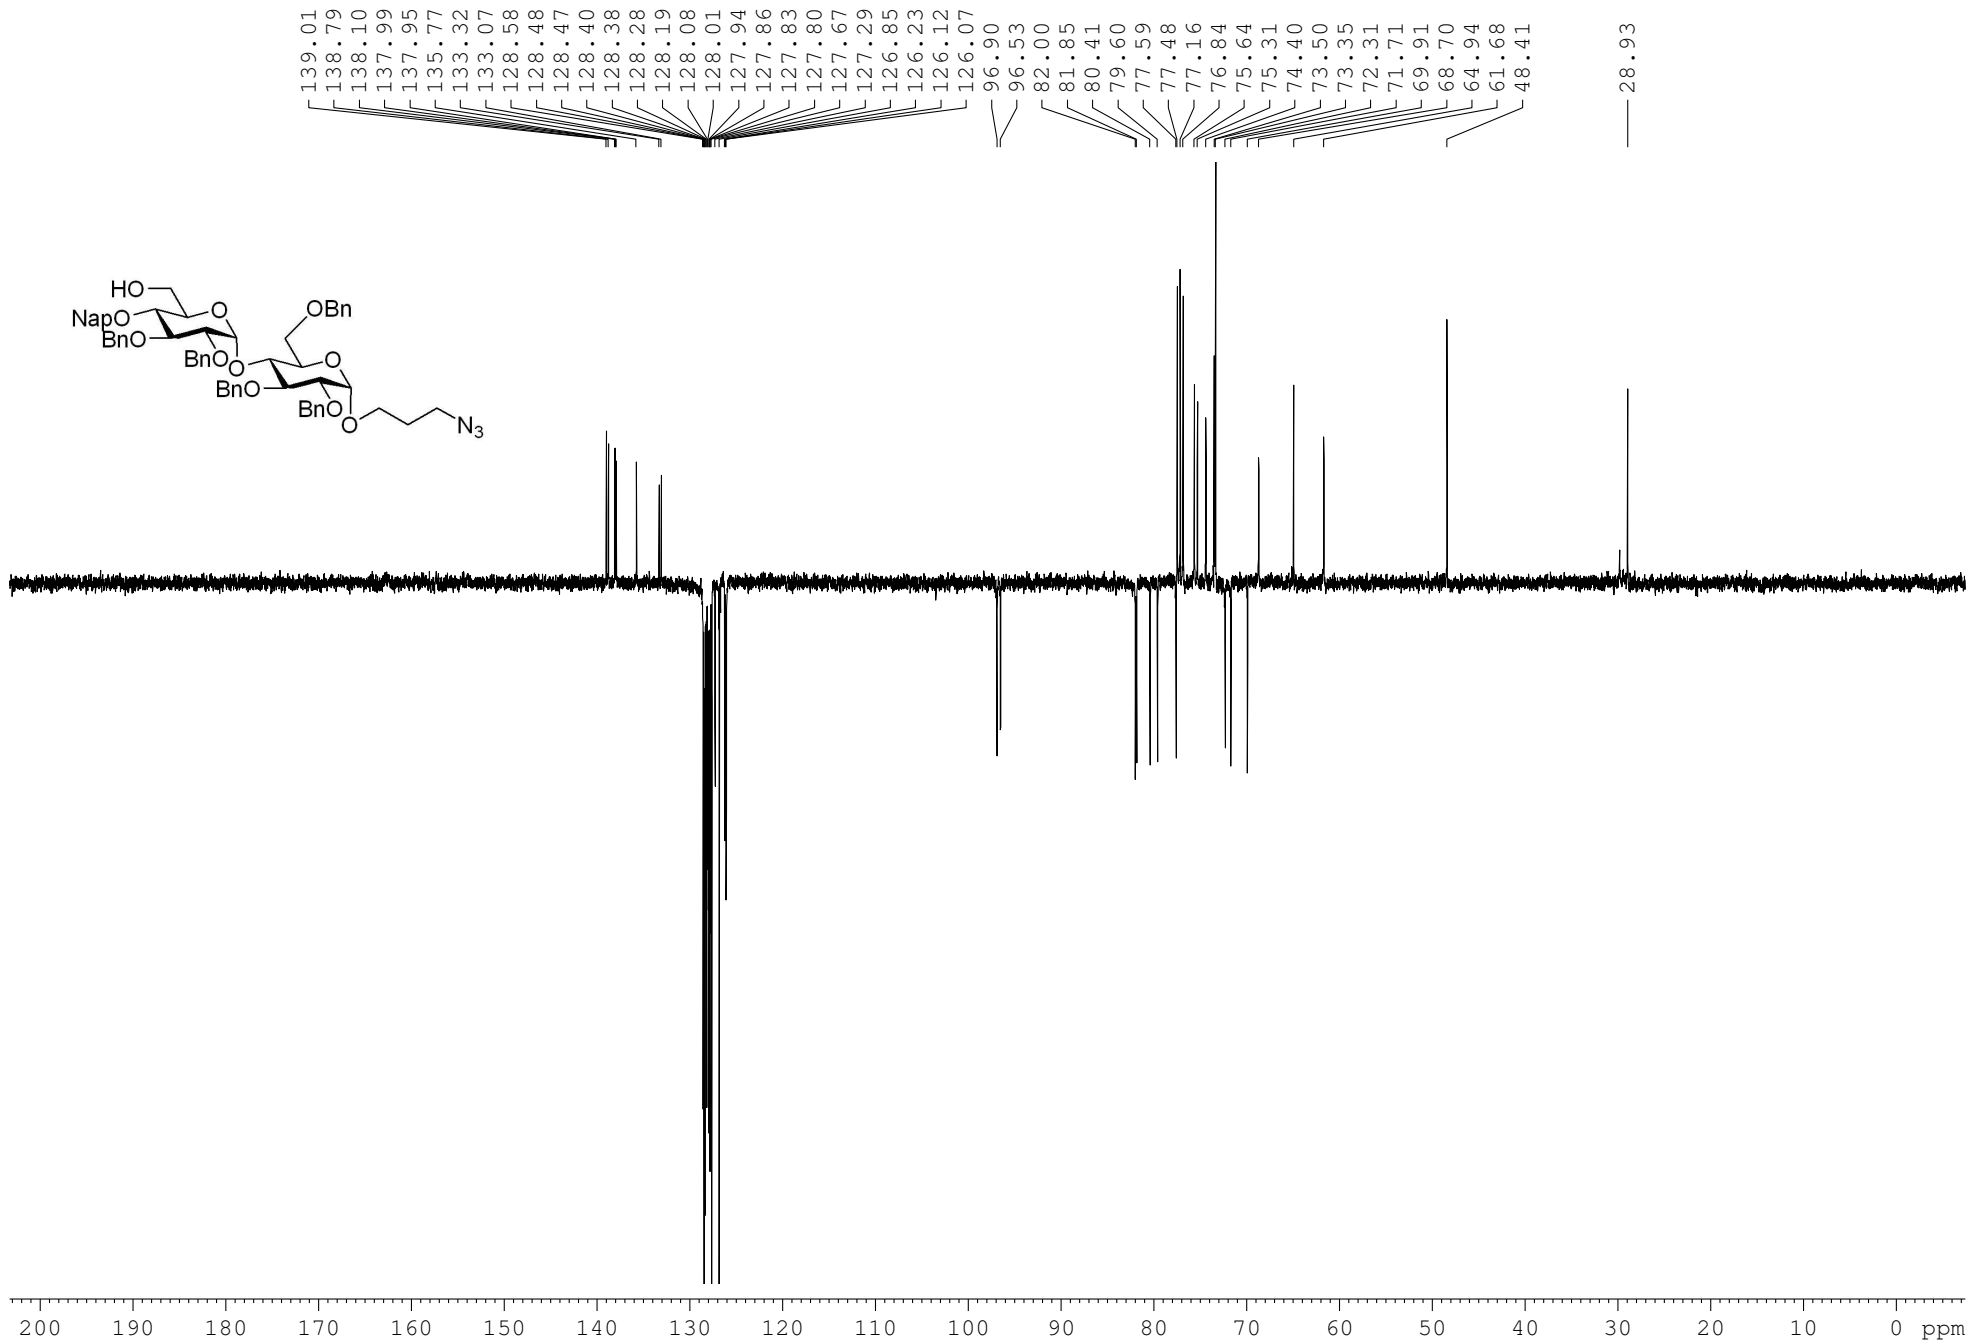

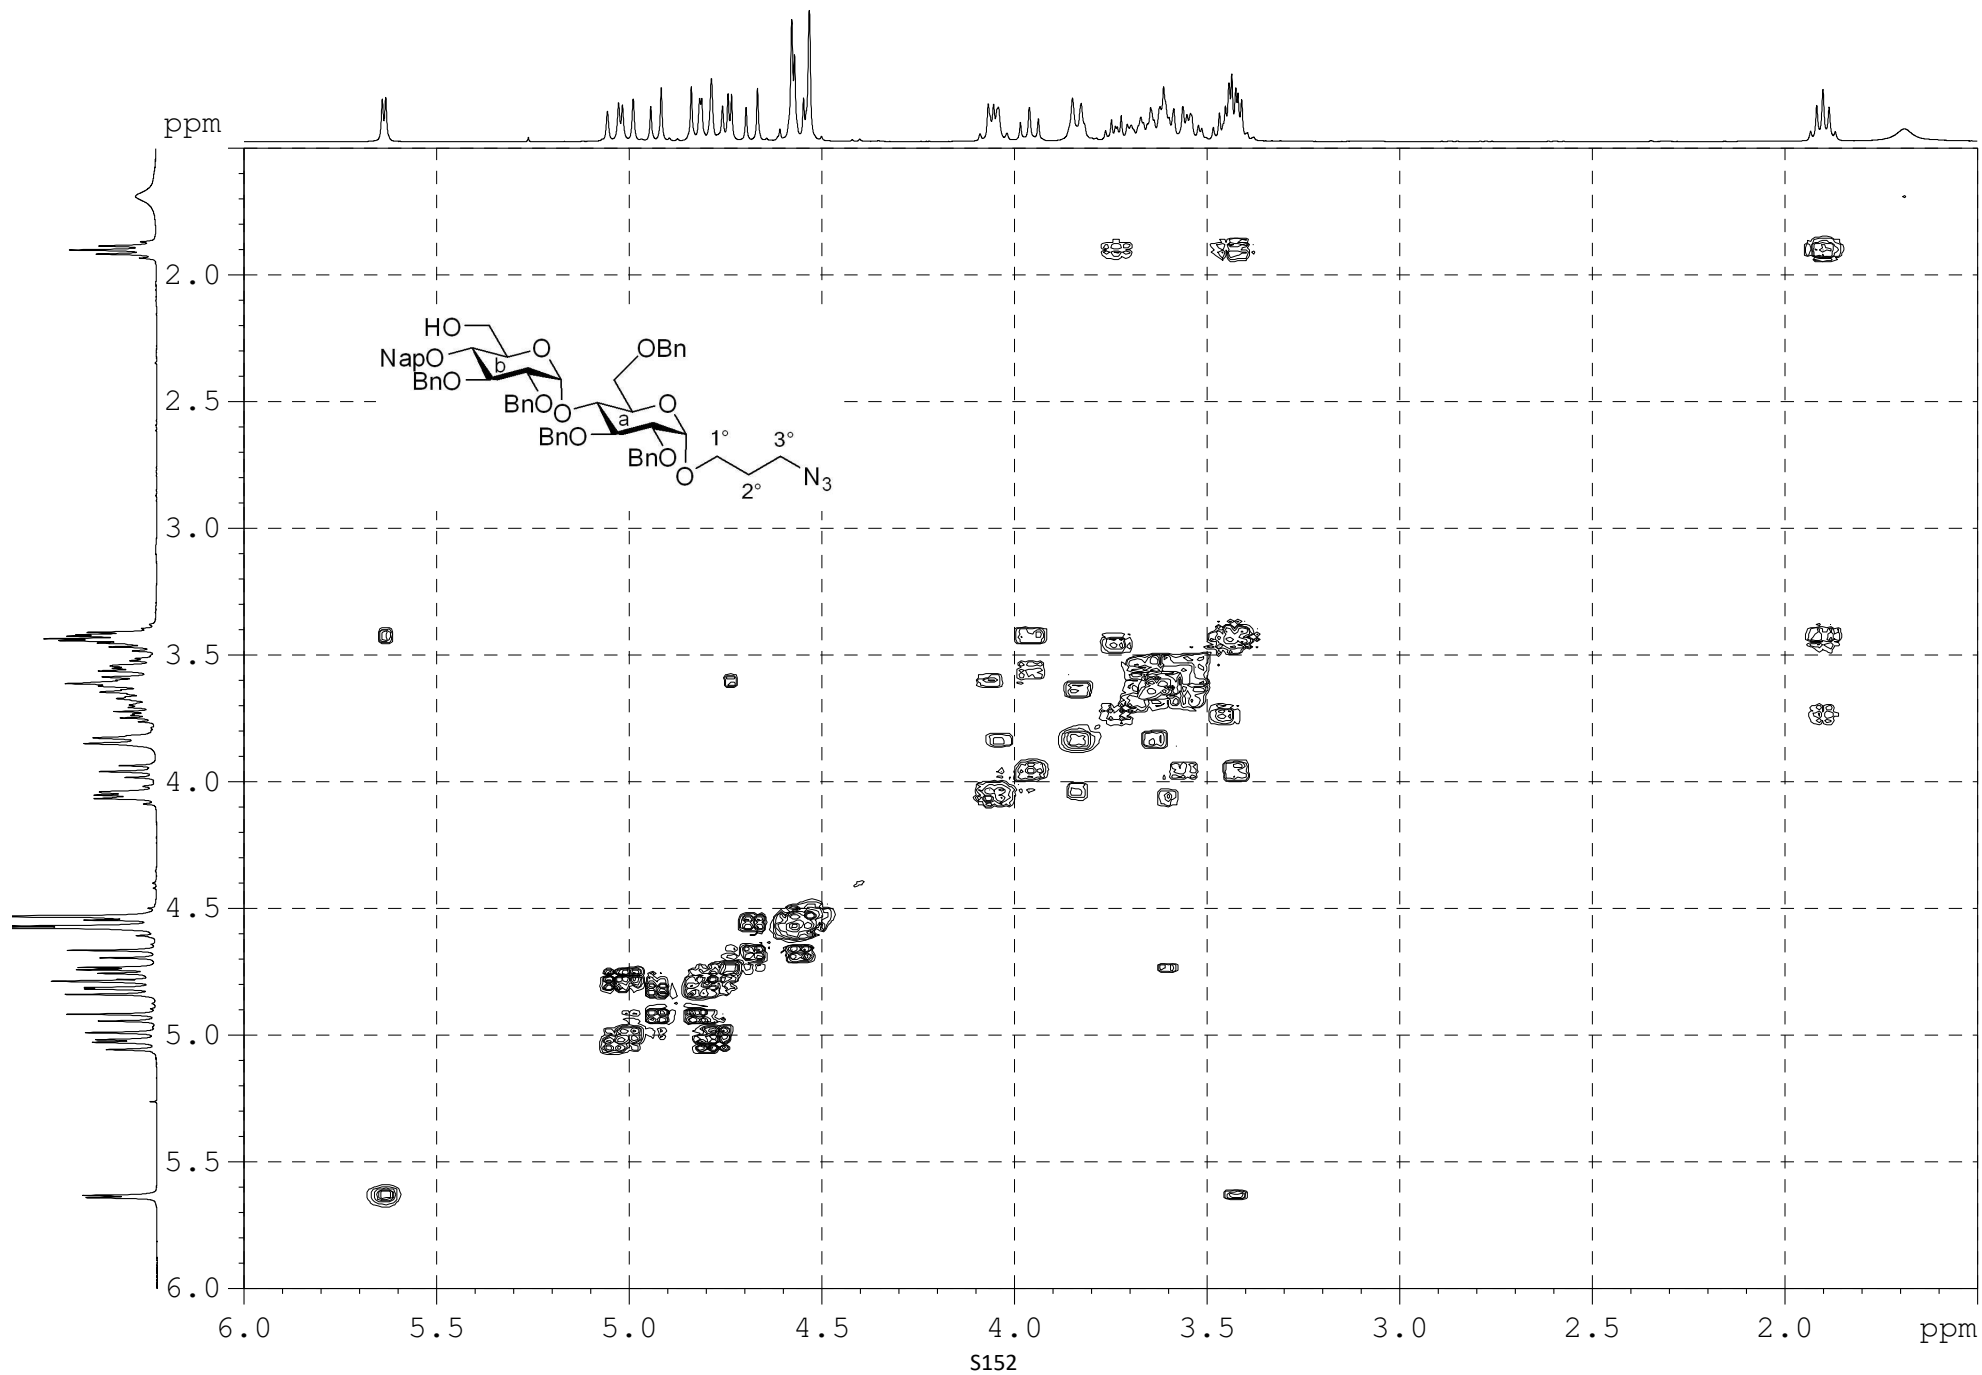

S152

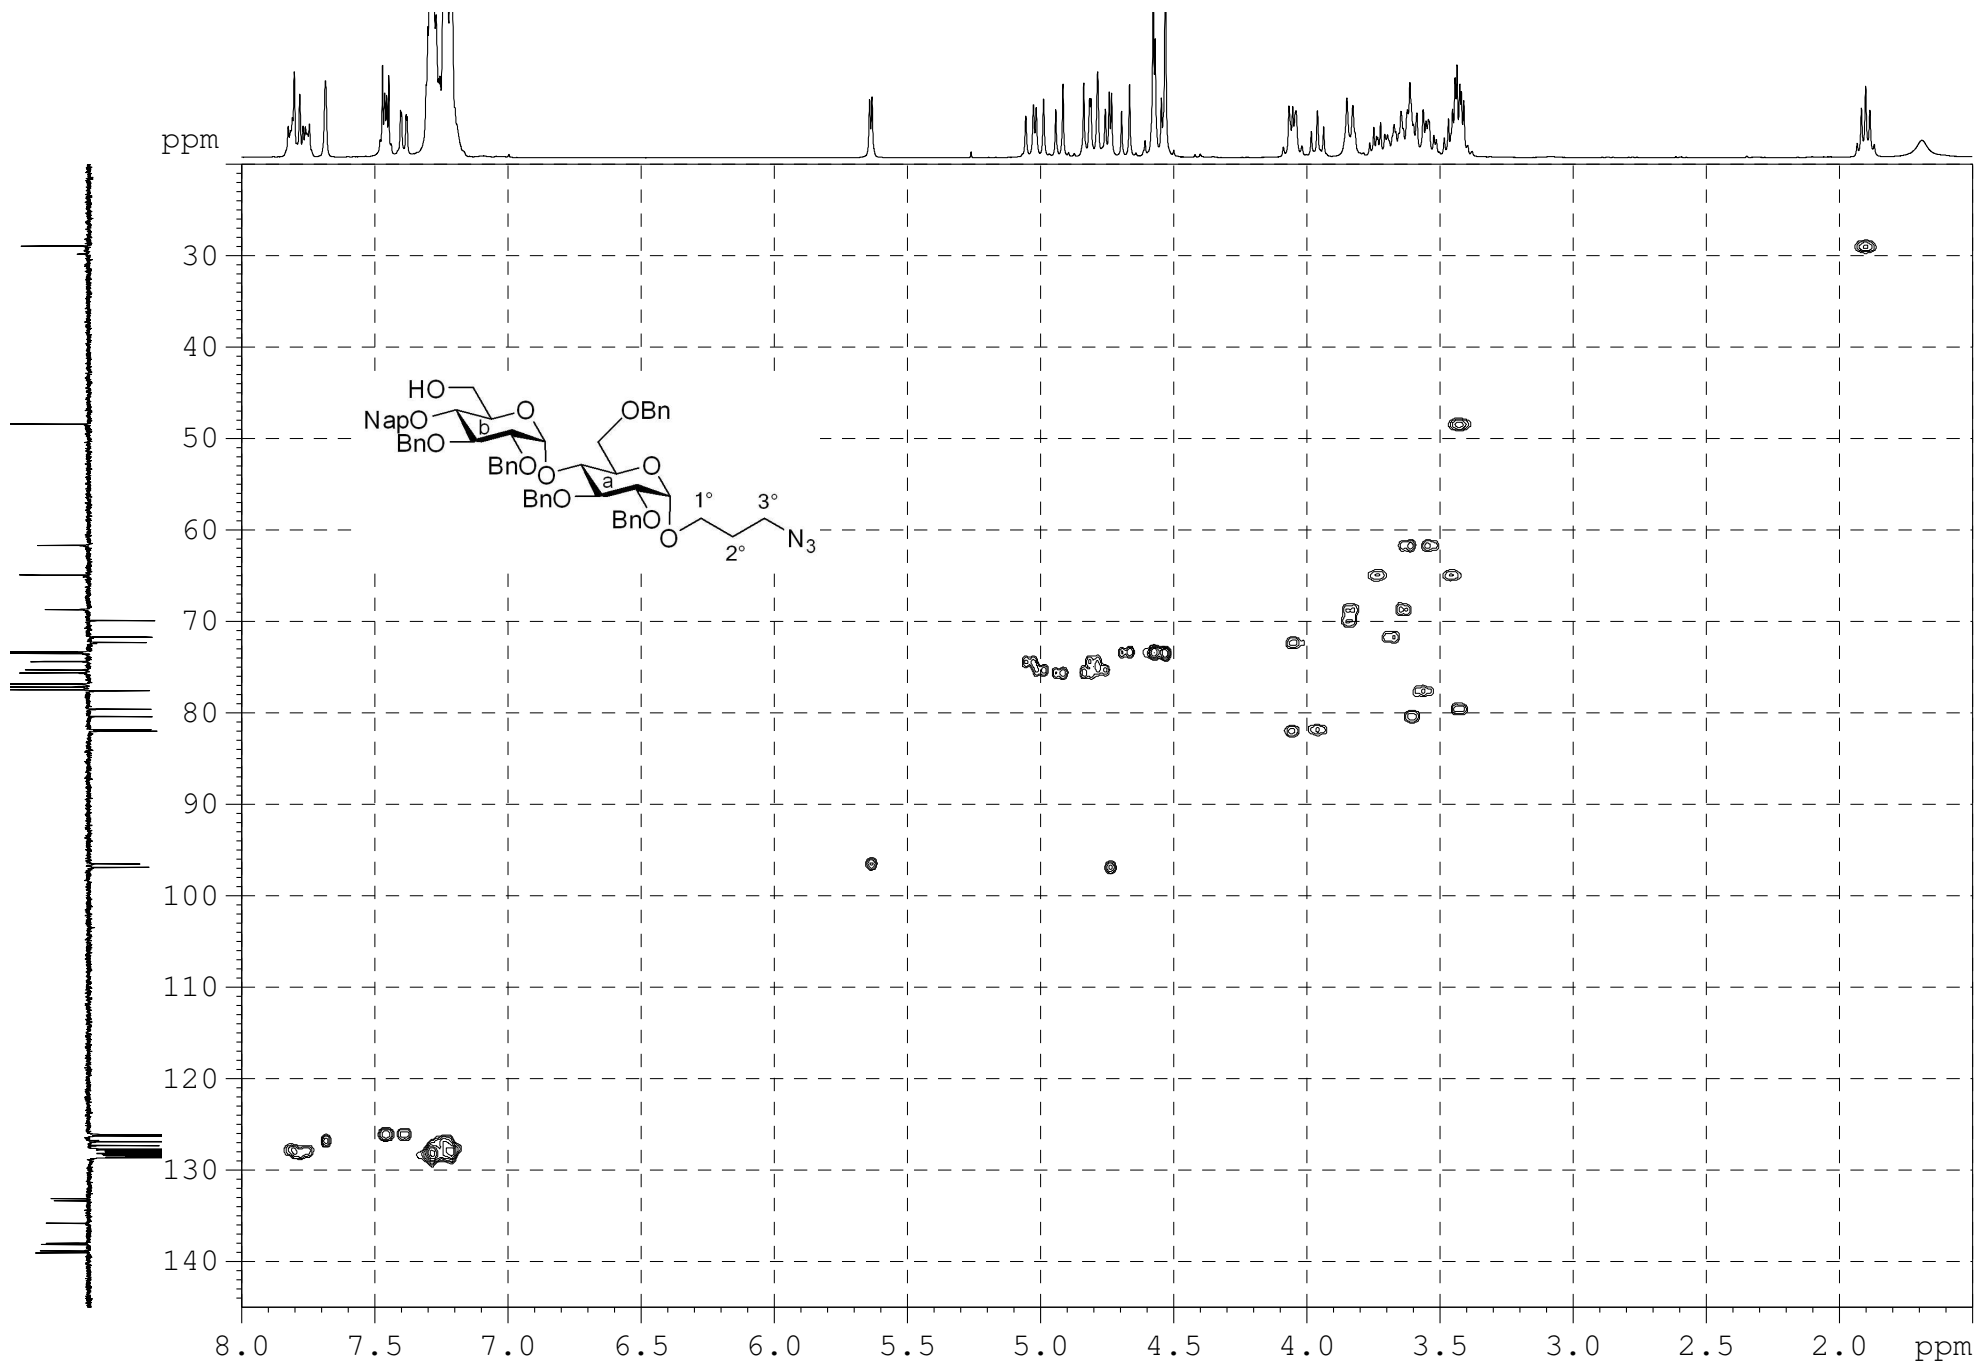

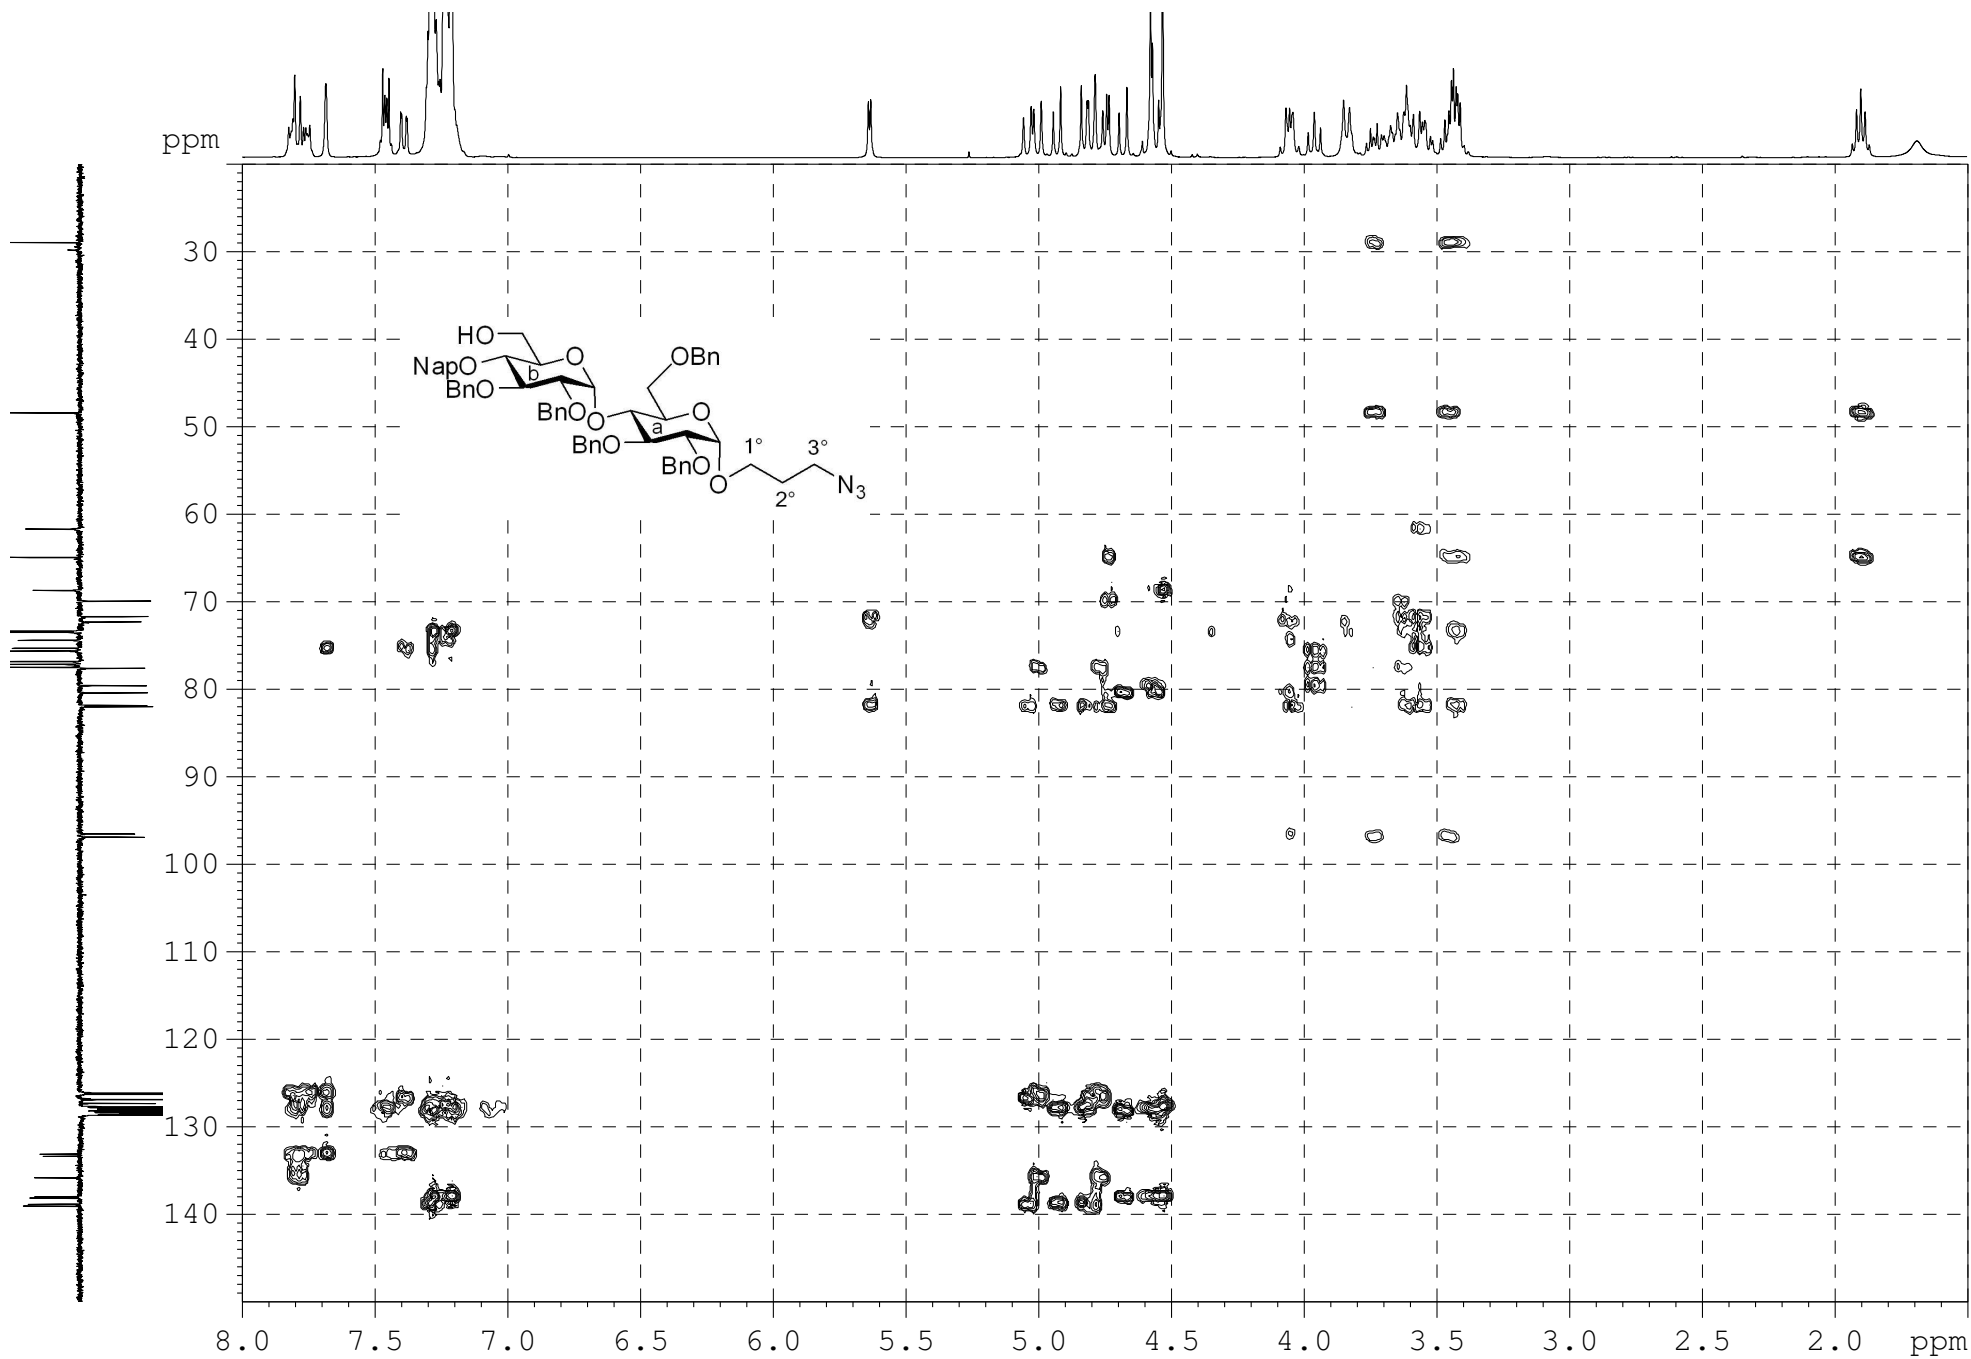

<sup>1</sup>H-NMR, <sup>13</sup>C-APT, <sup>1</sup>H-<sup>1</sup>H COSY, HSQC, HMBC, GATED of **32**

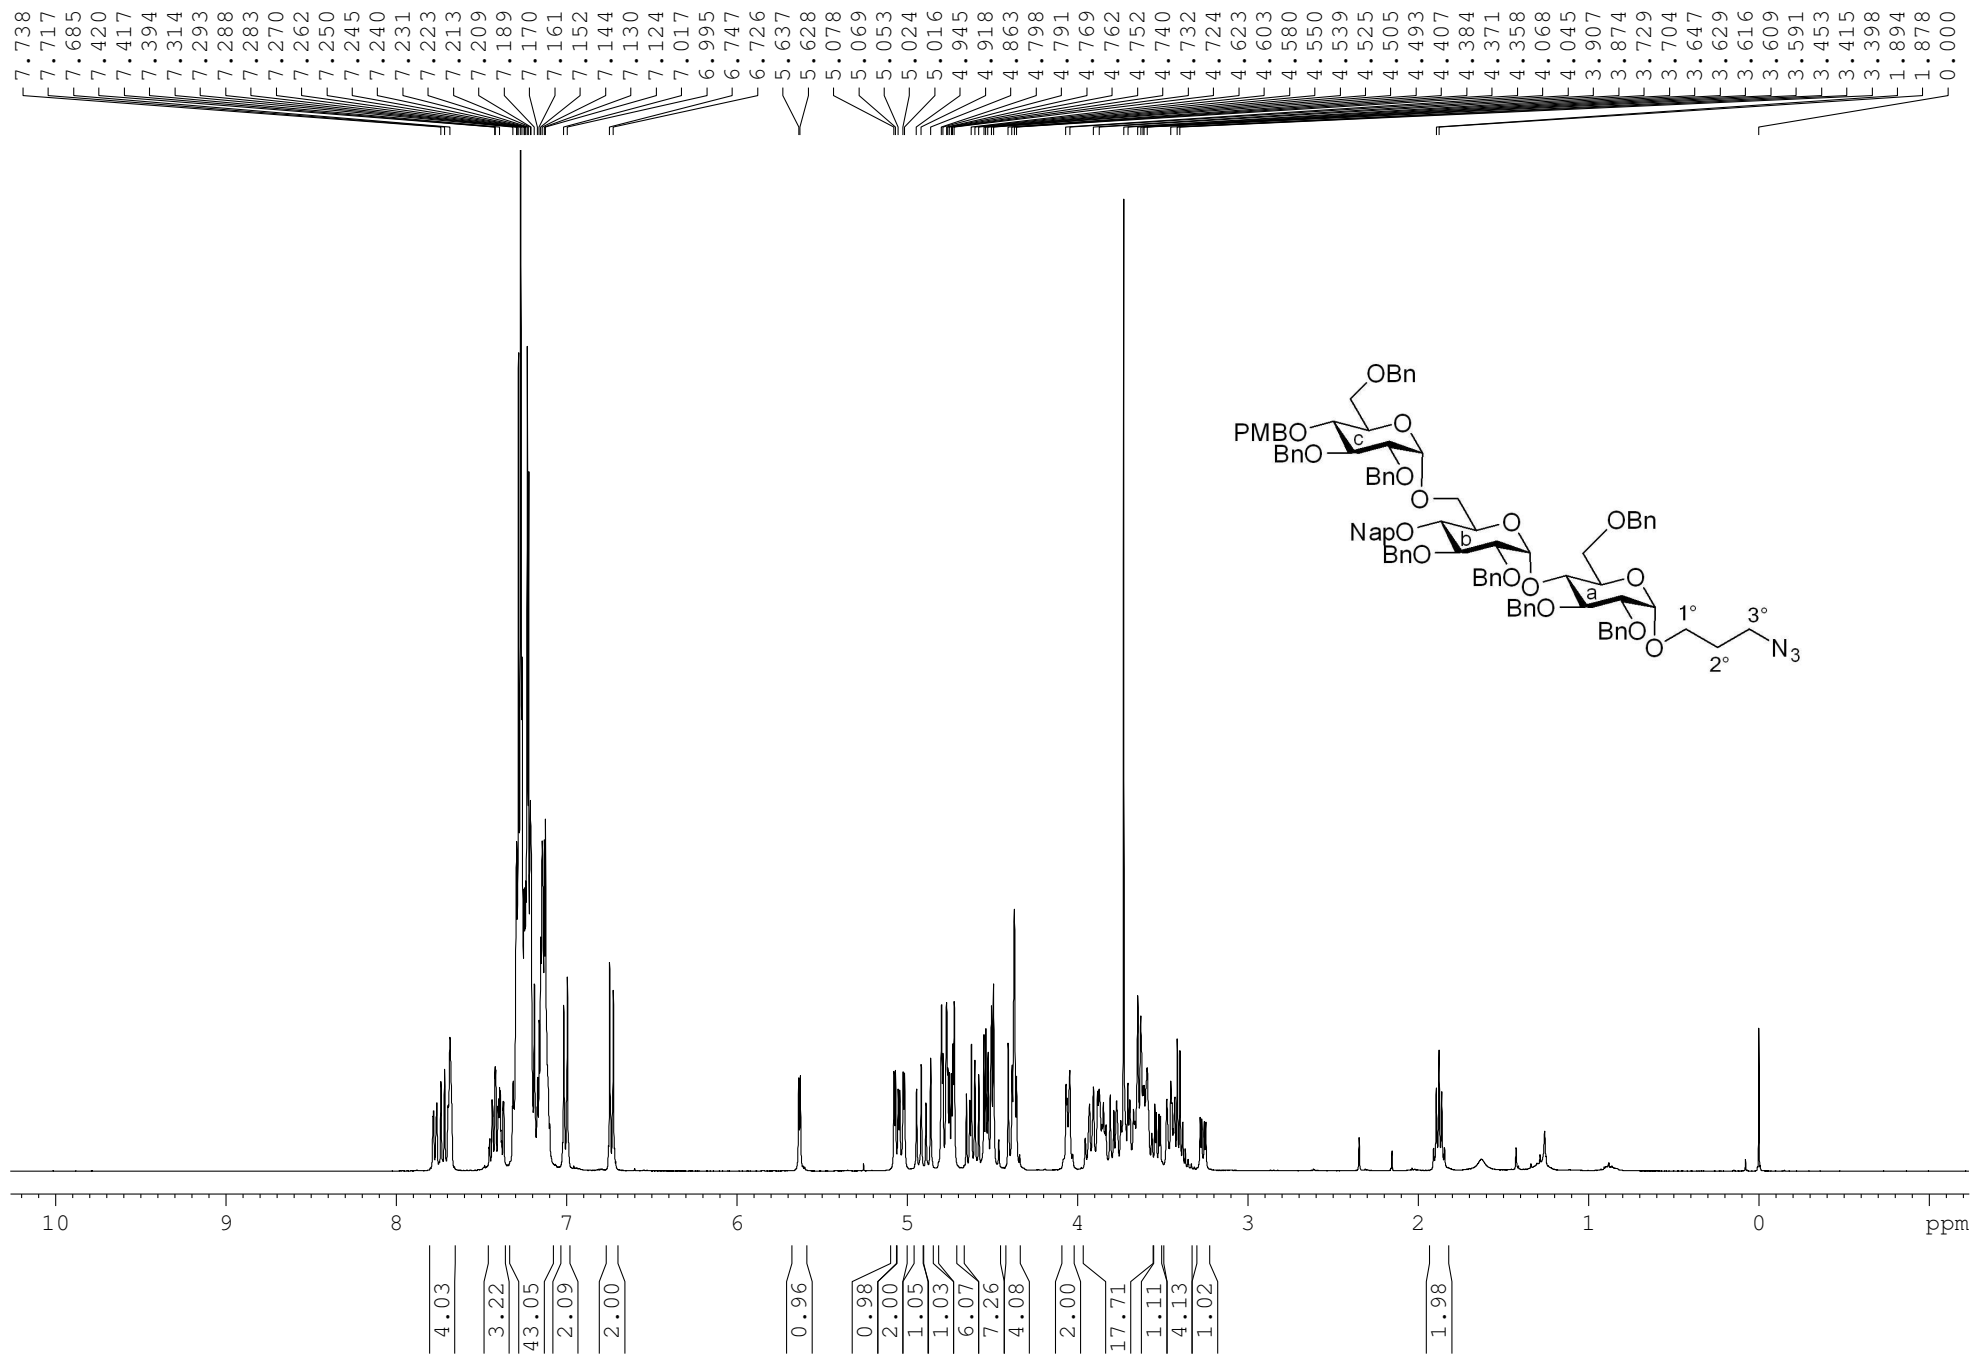





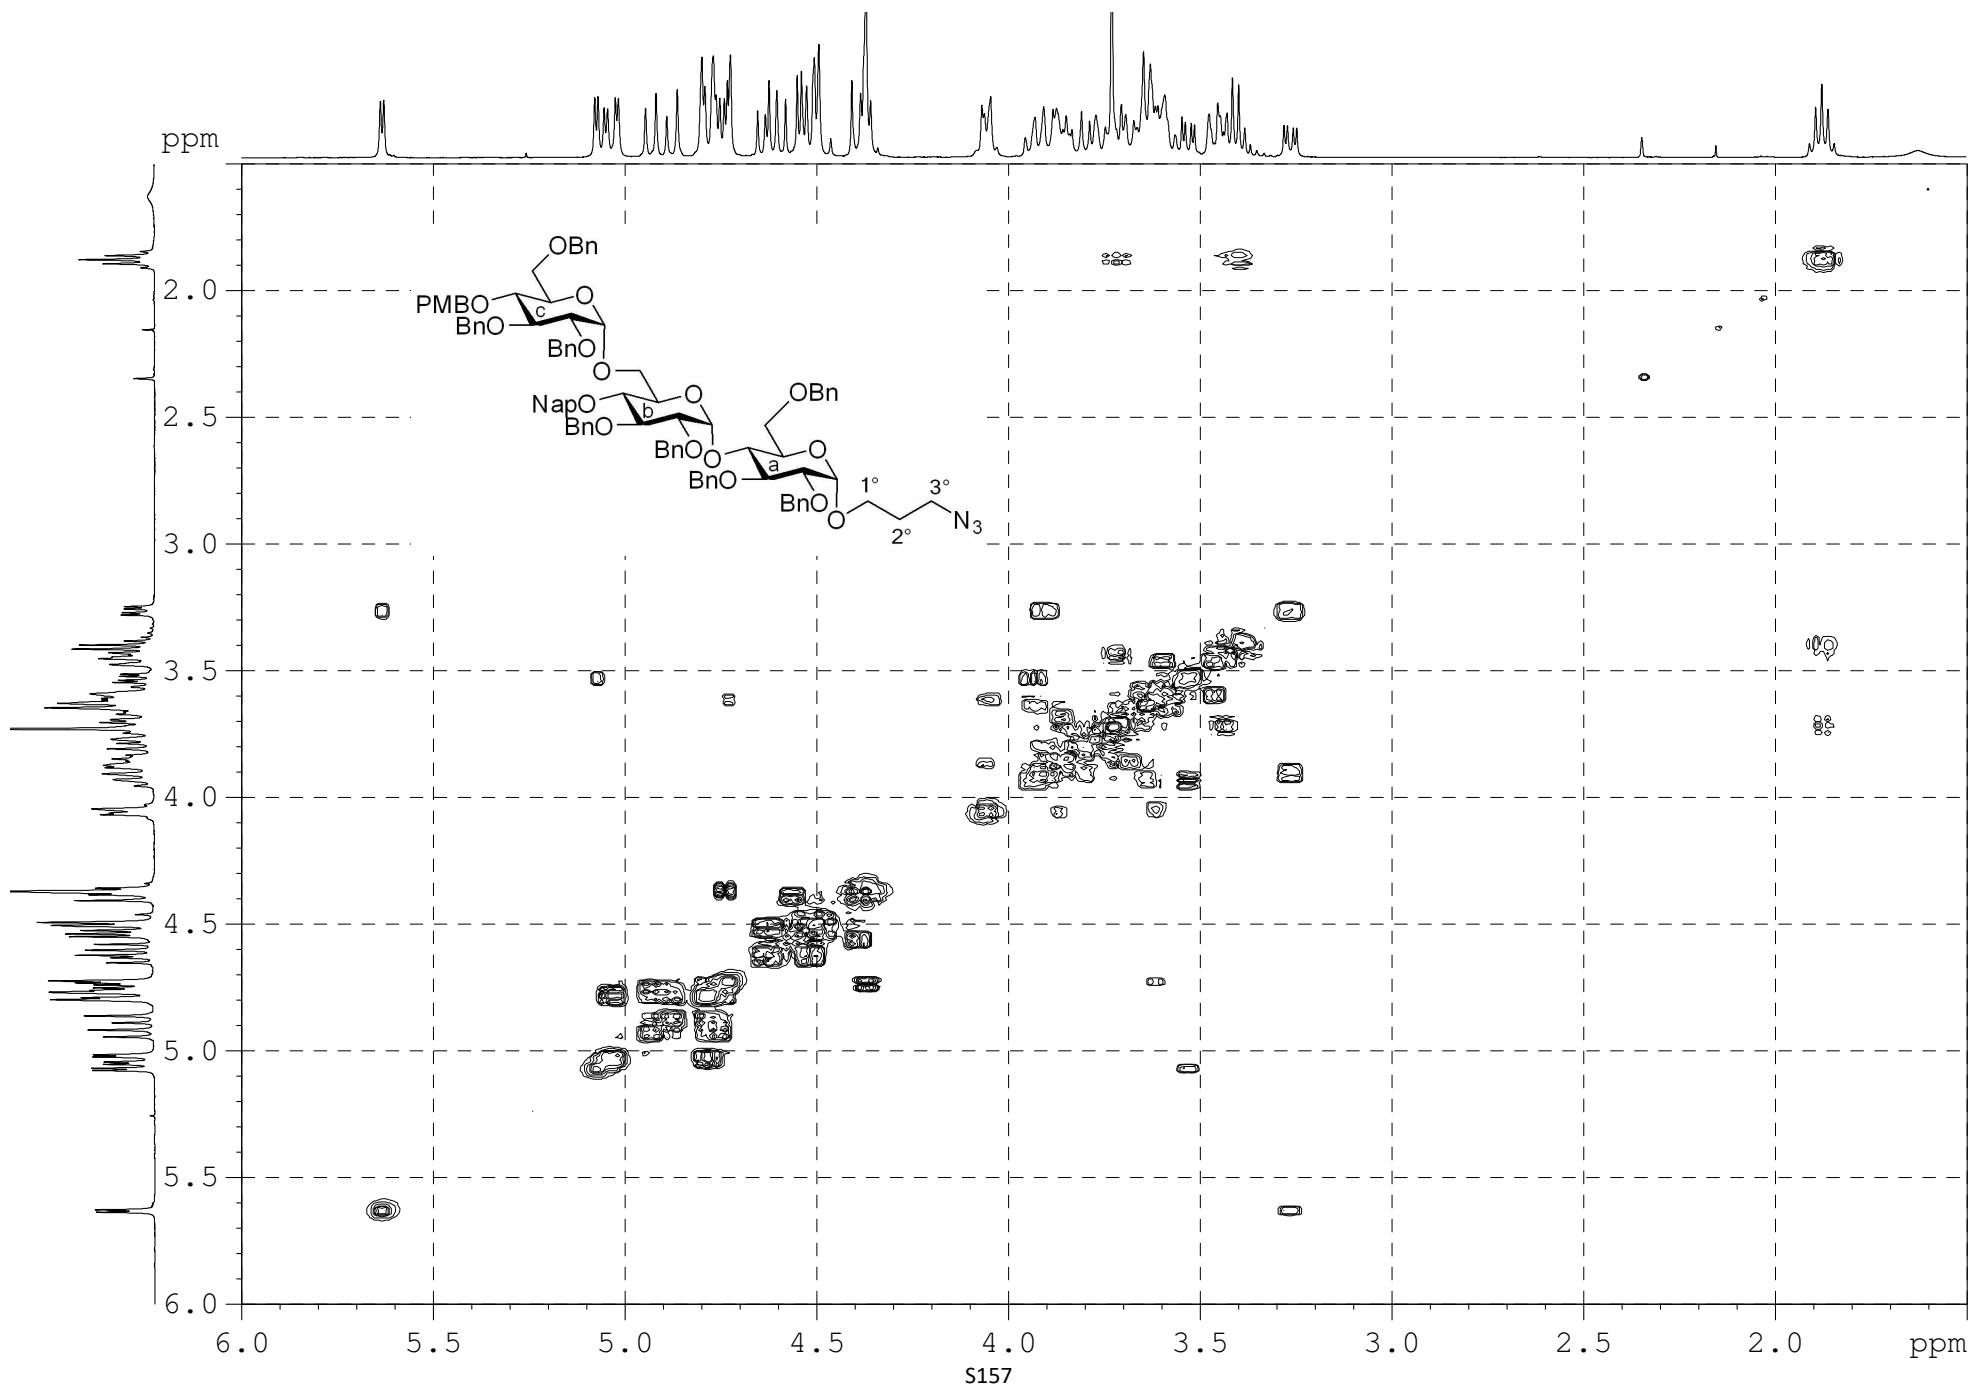

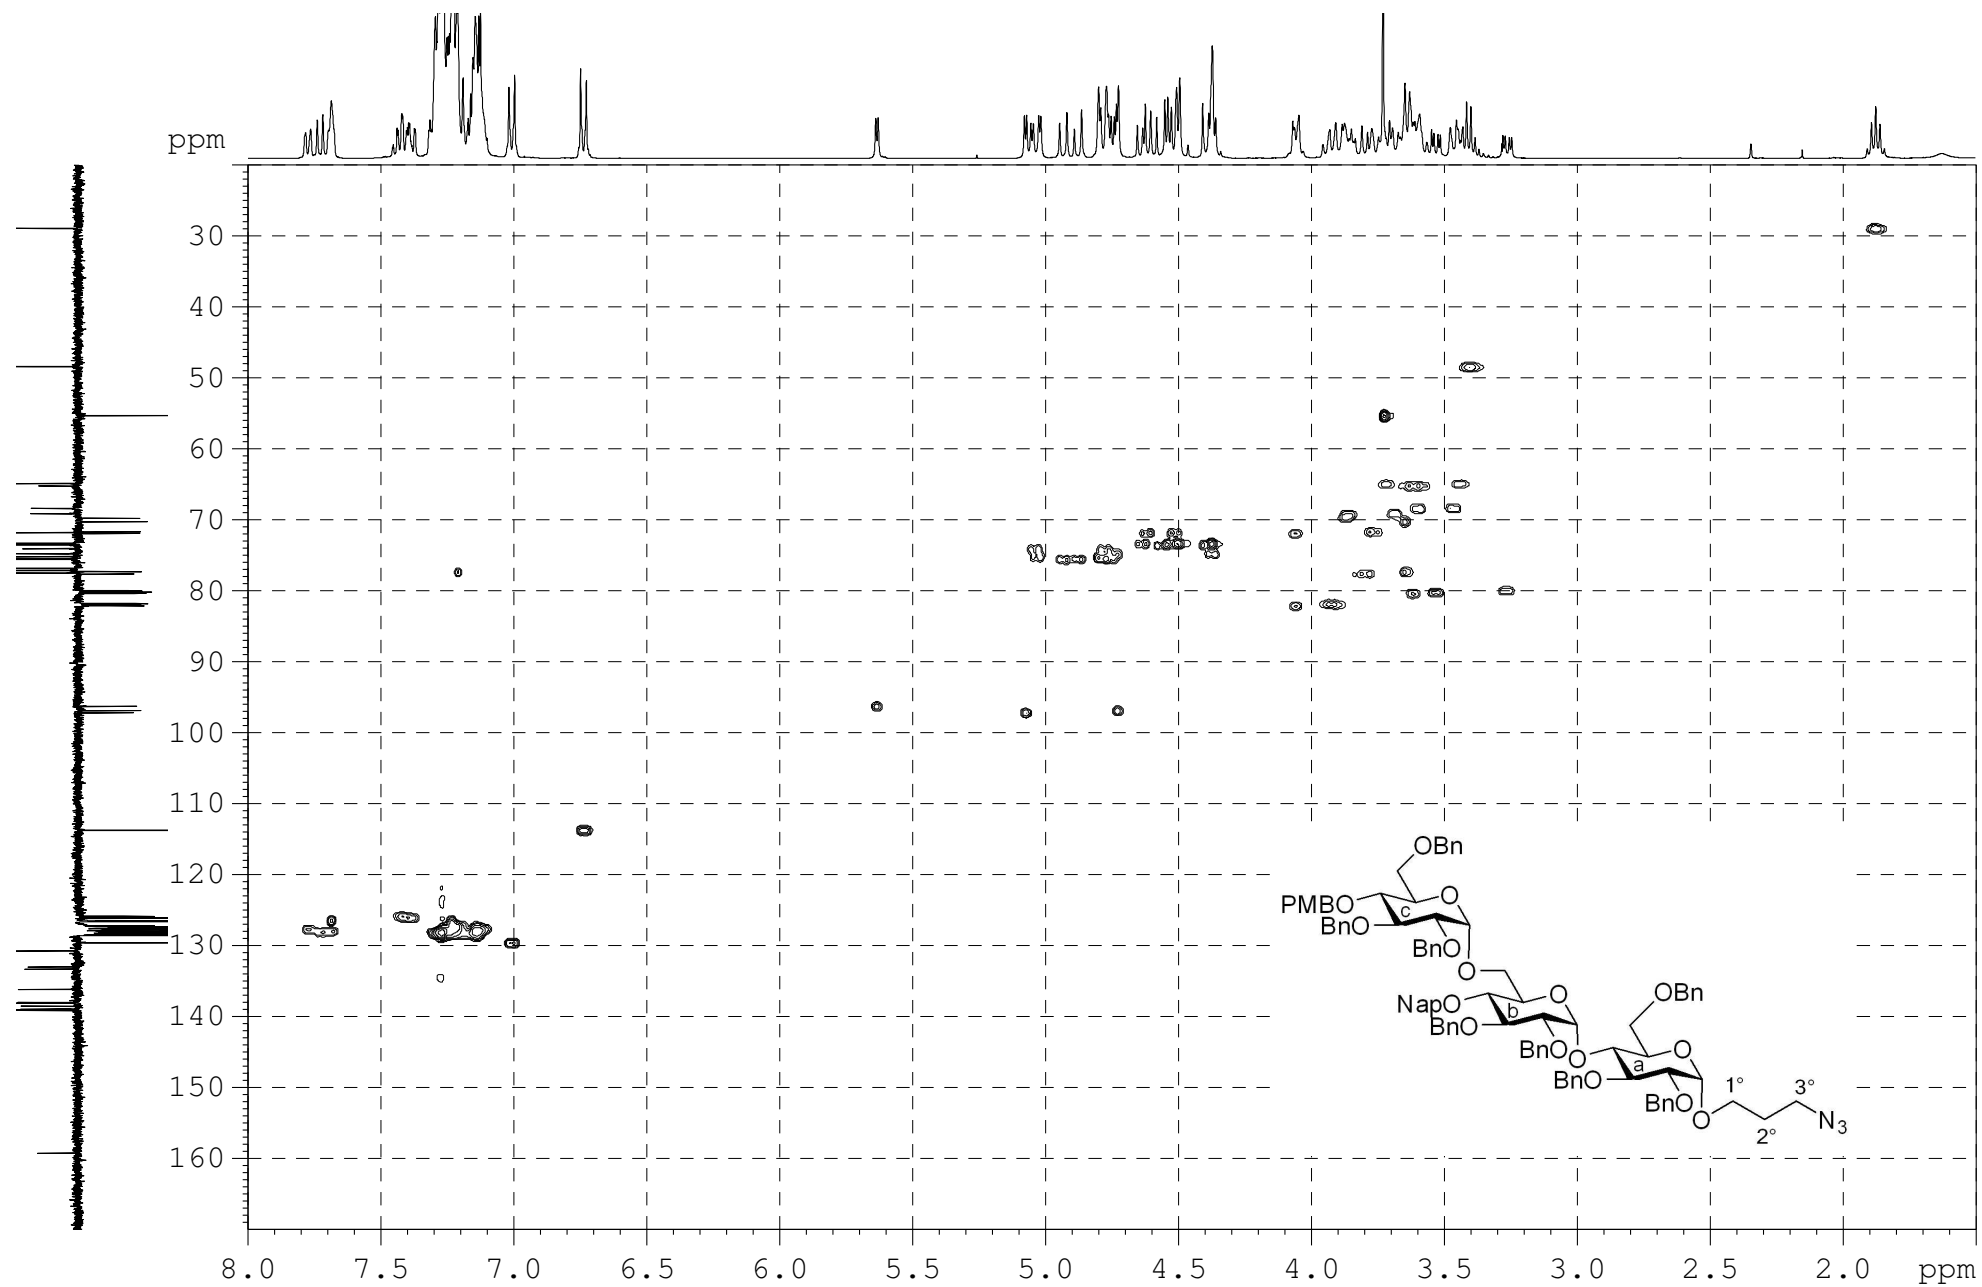

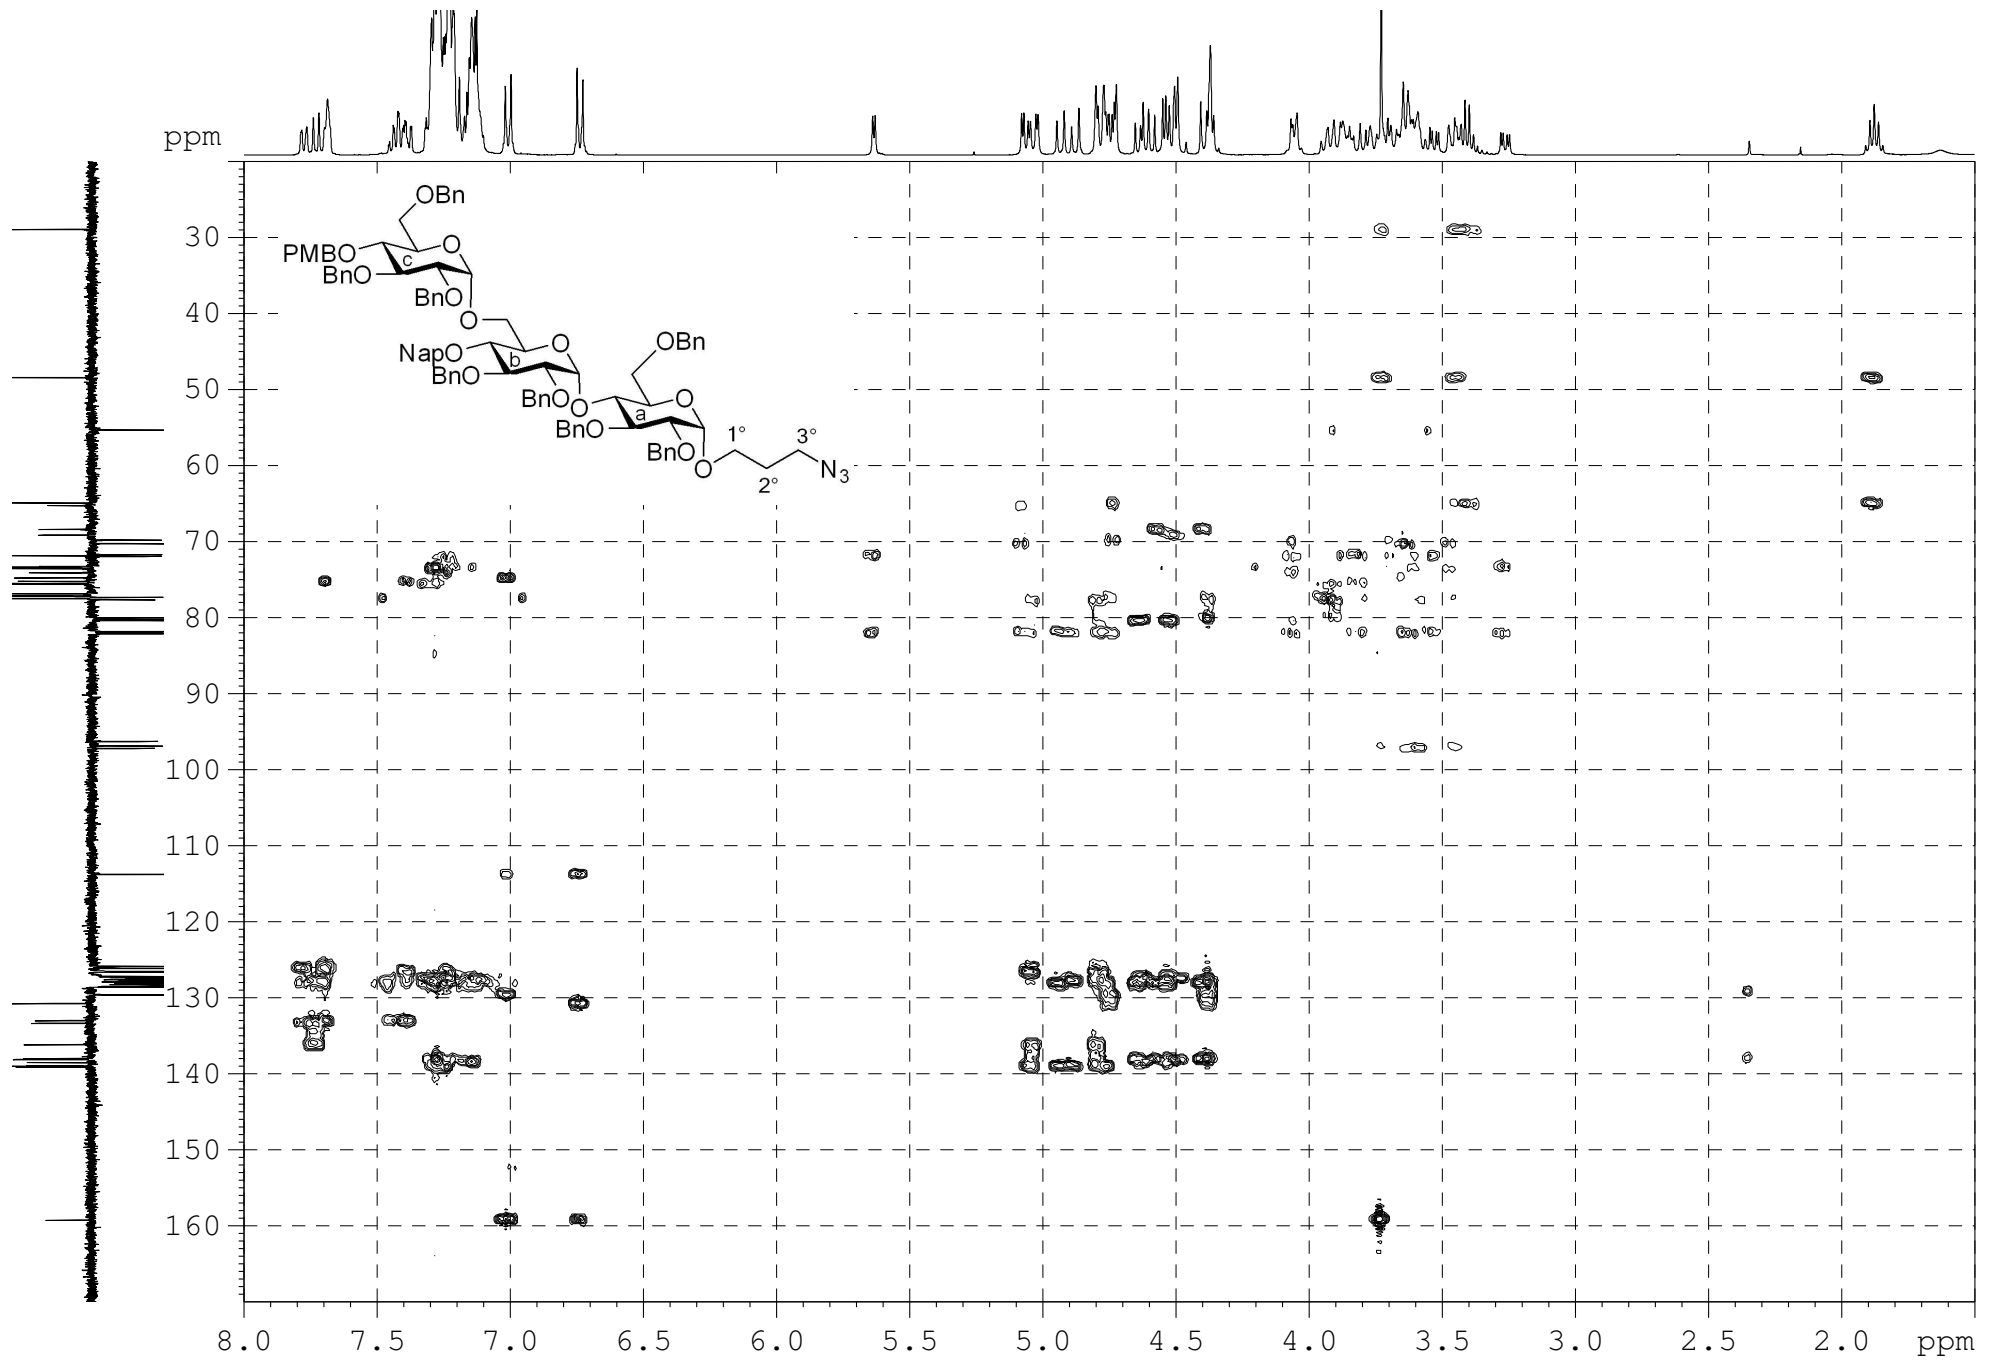

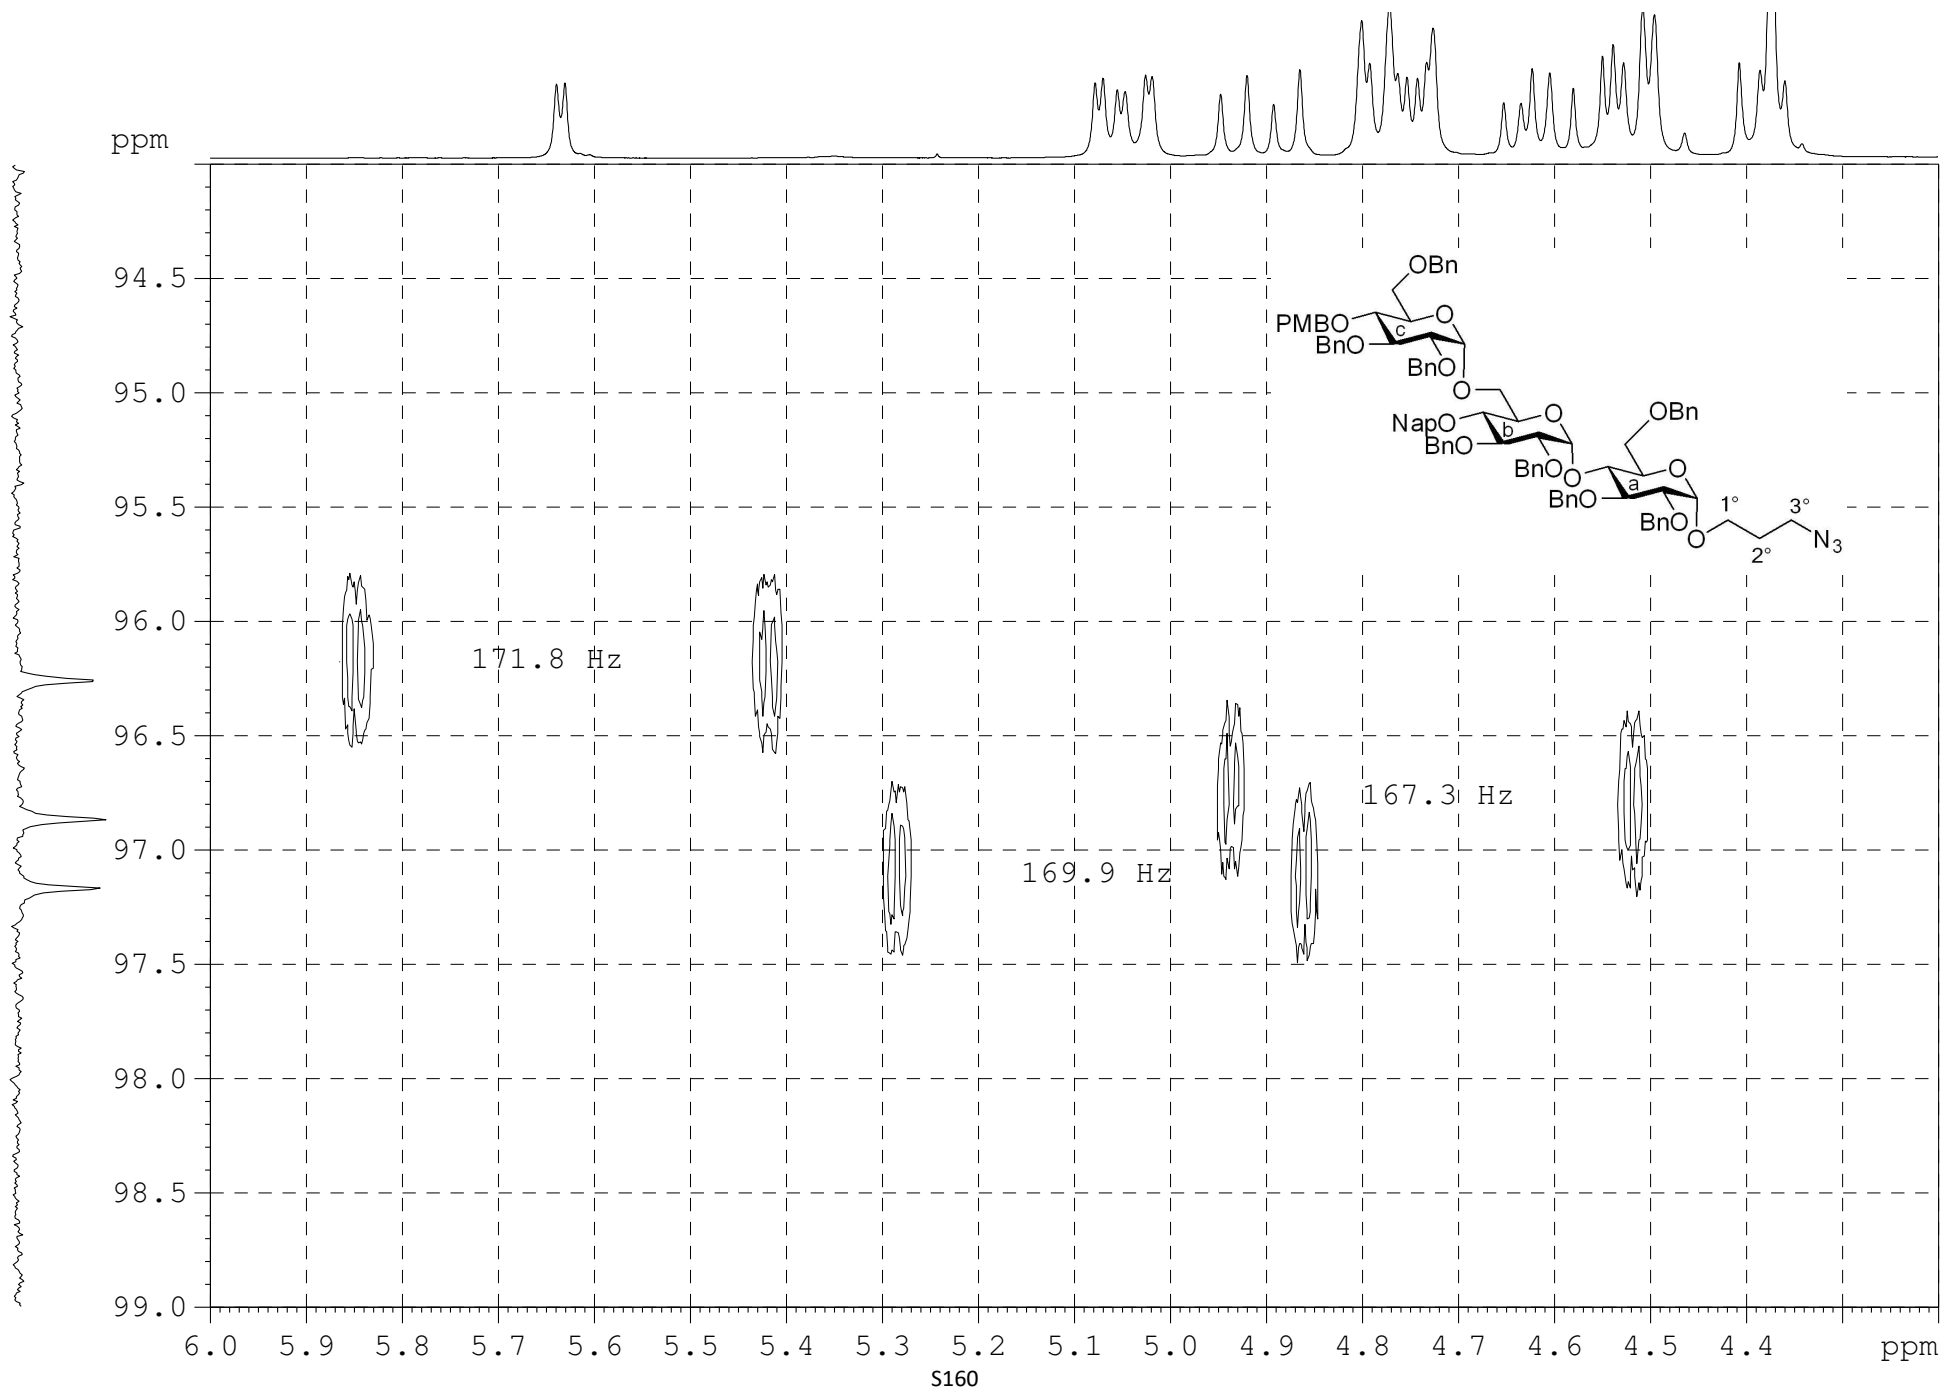

<sup>1</sup>H-NMR, <sup>13</sup>C-APT, <sup>1</sup>H-<sup>1</sup>H COSY, HSQC of **33**

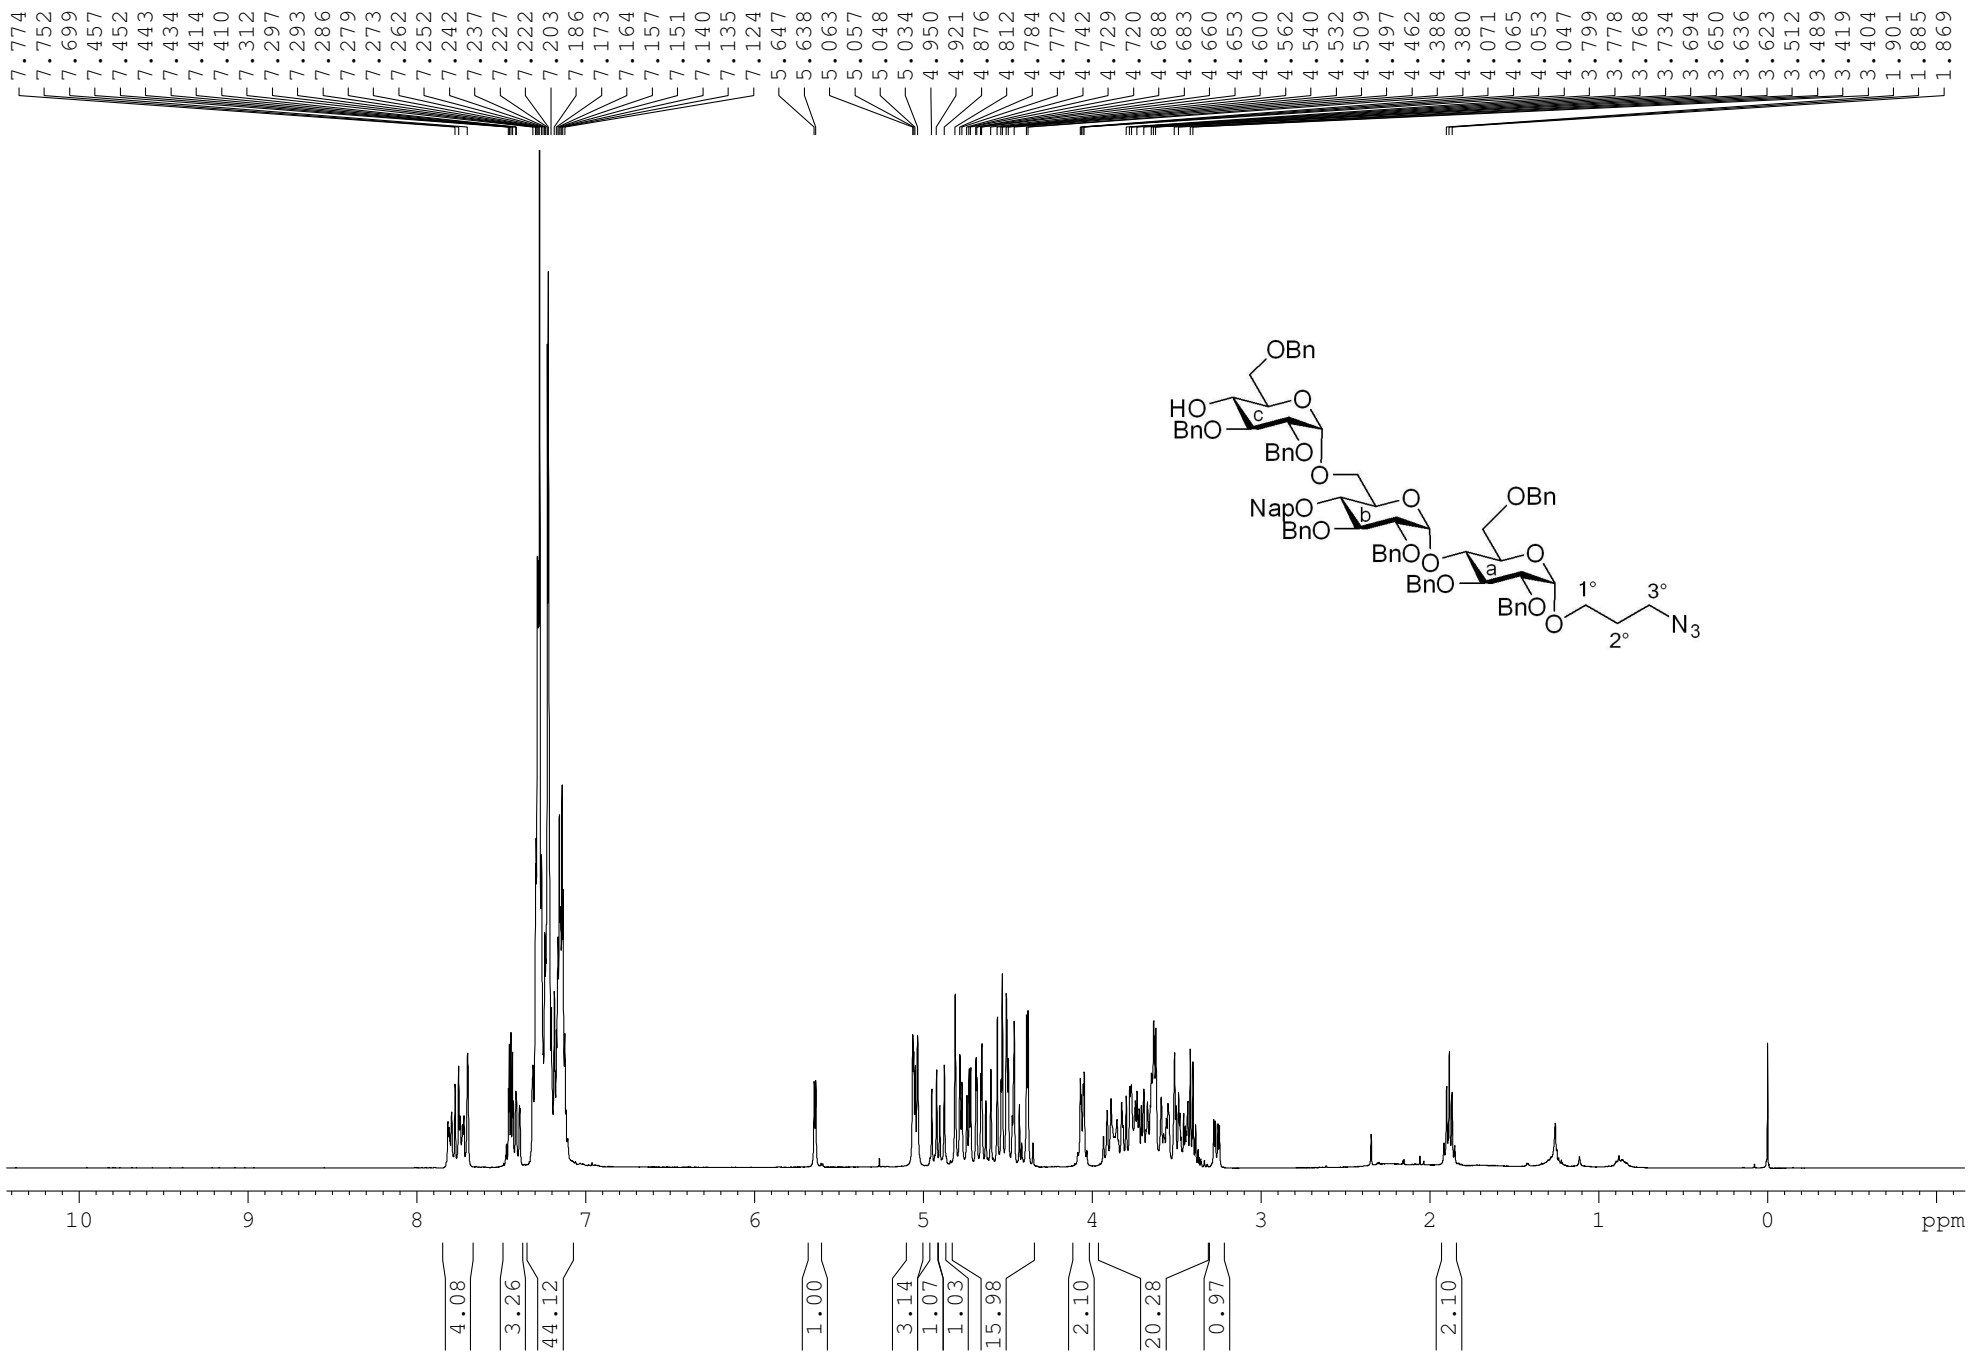

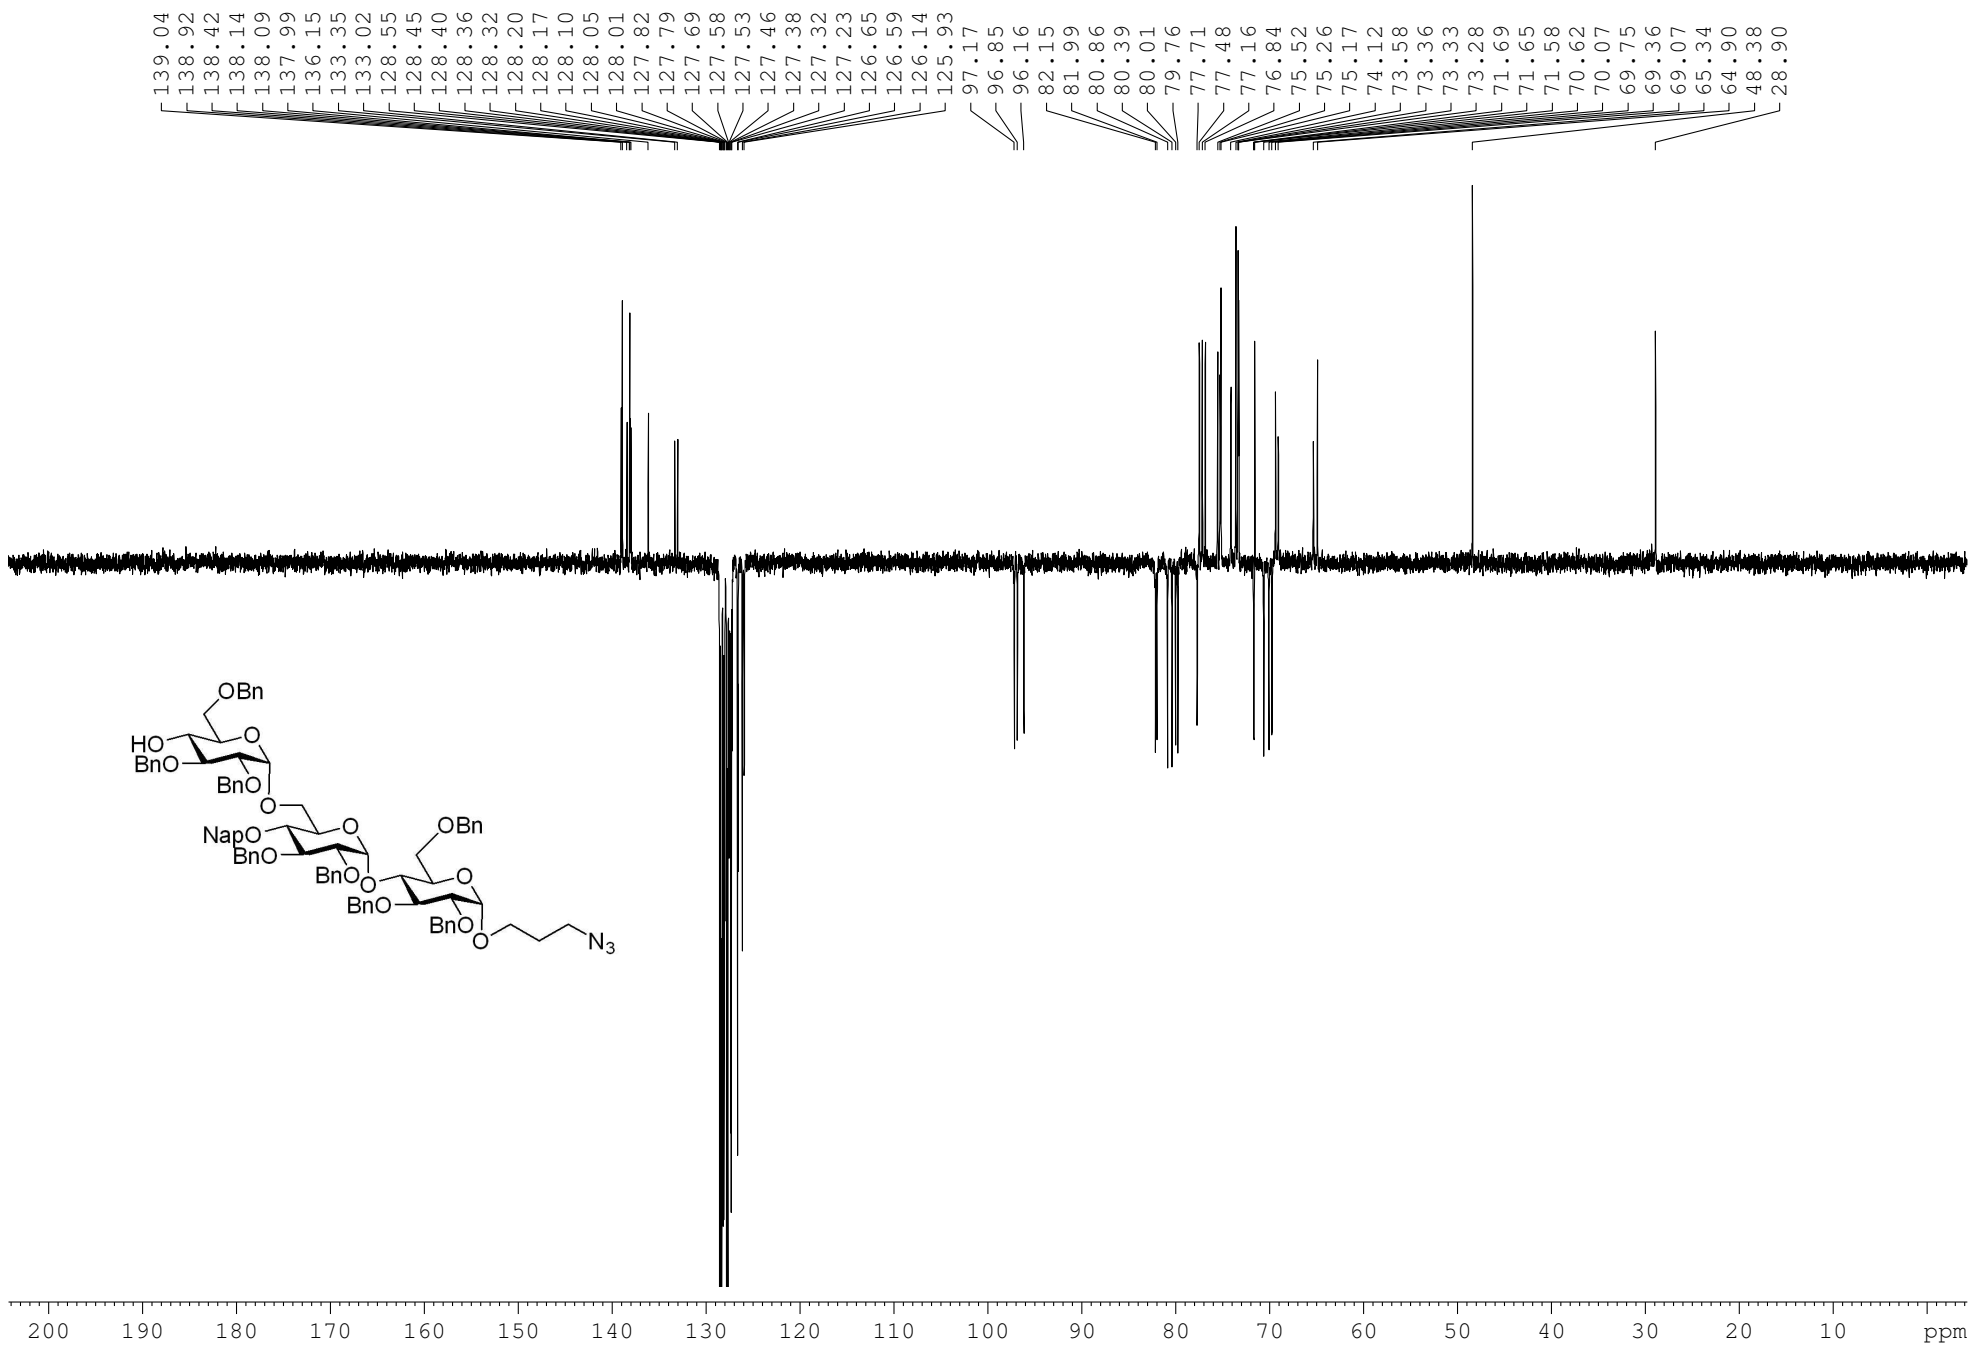

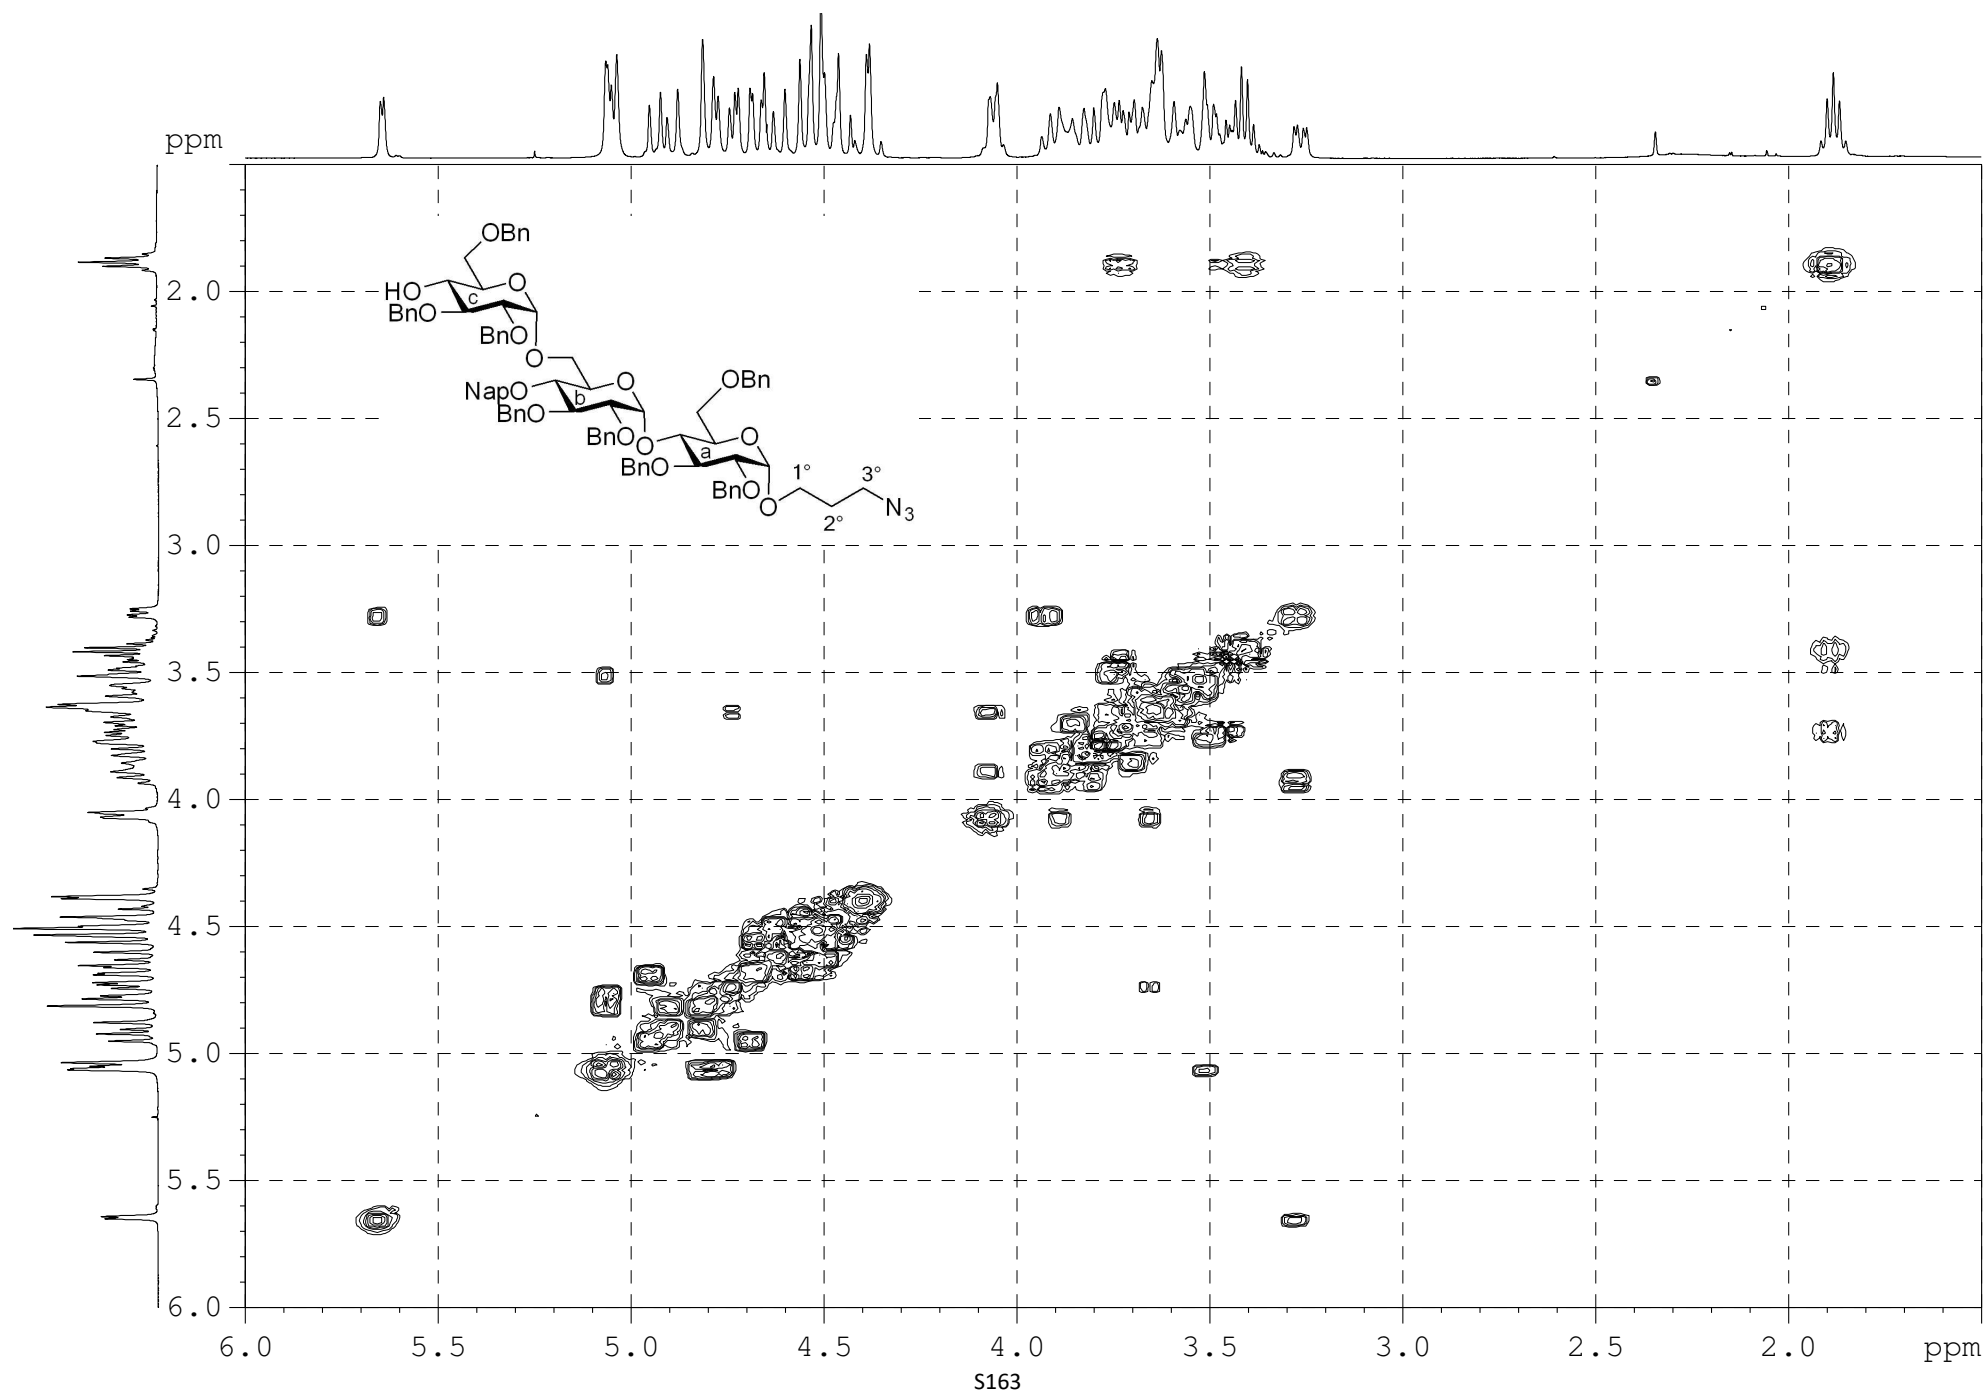

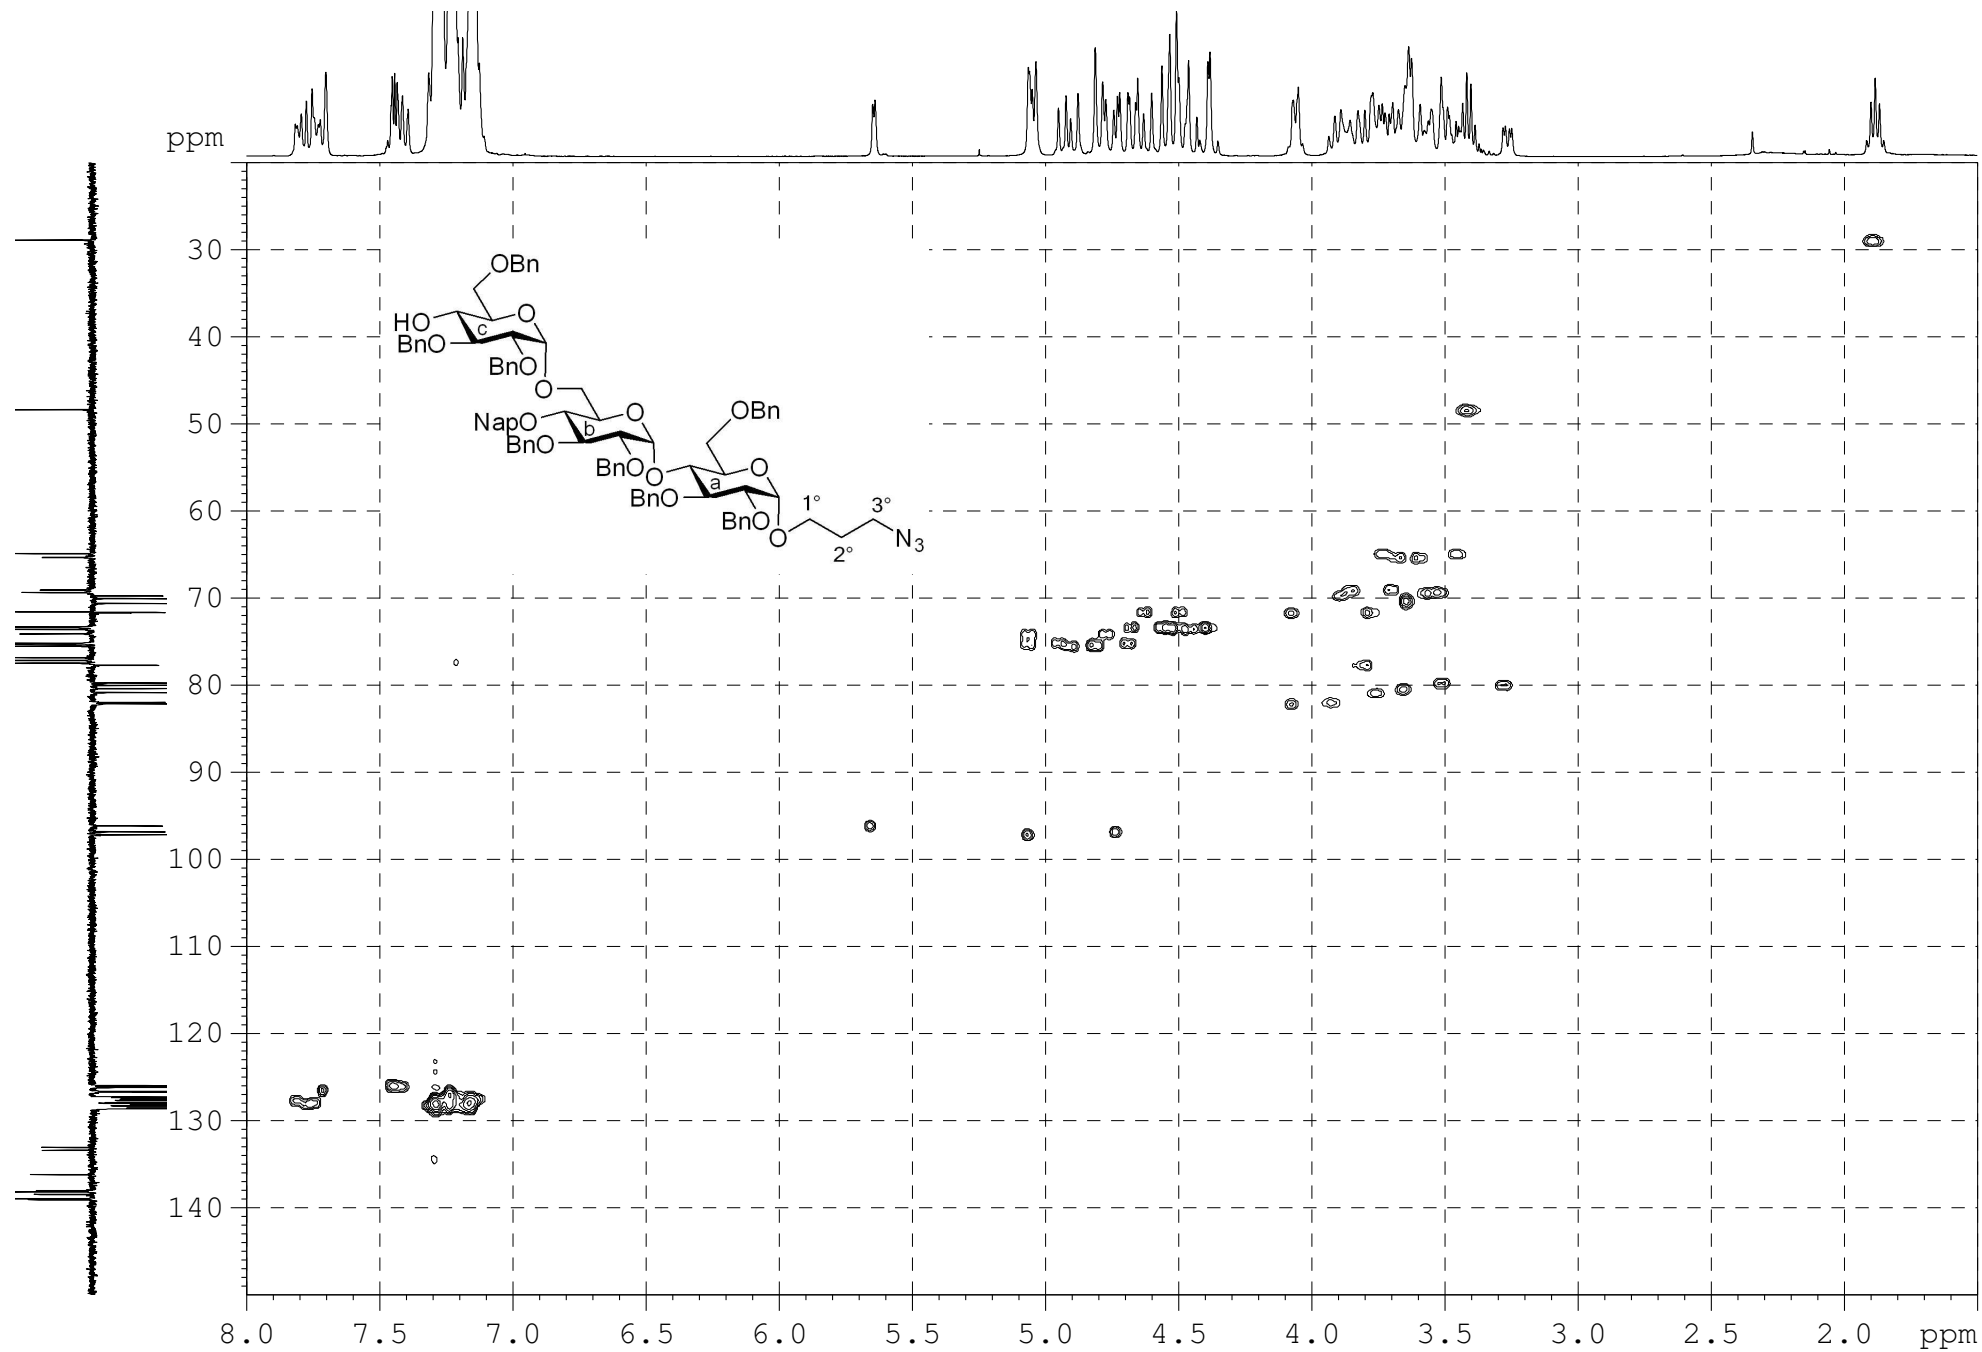



<sup>1</sup>H-NMR, <sup>13</sup>C-APT, <sup>1</sup>H-<sup>1</sup>H COSY, HSQC, HMBC, GATED of **34**

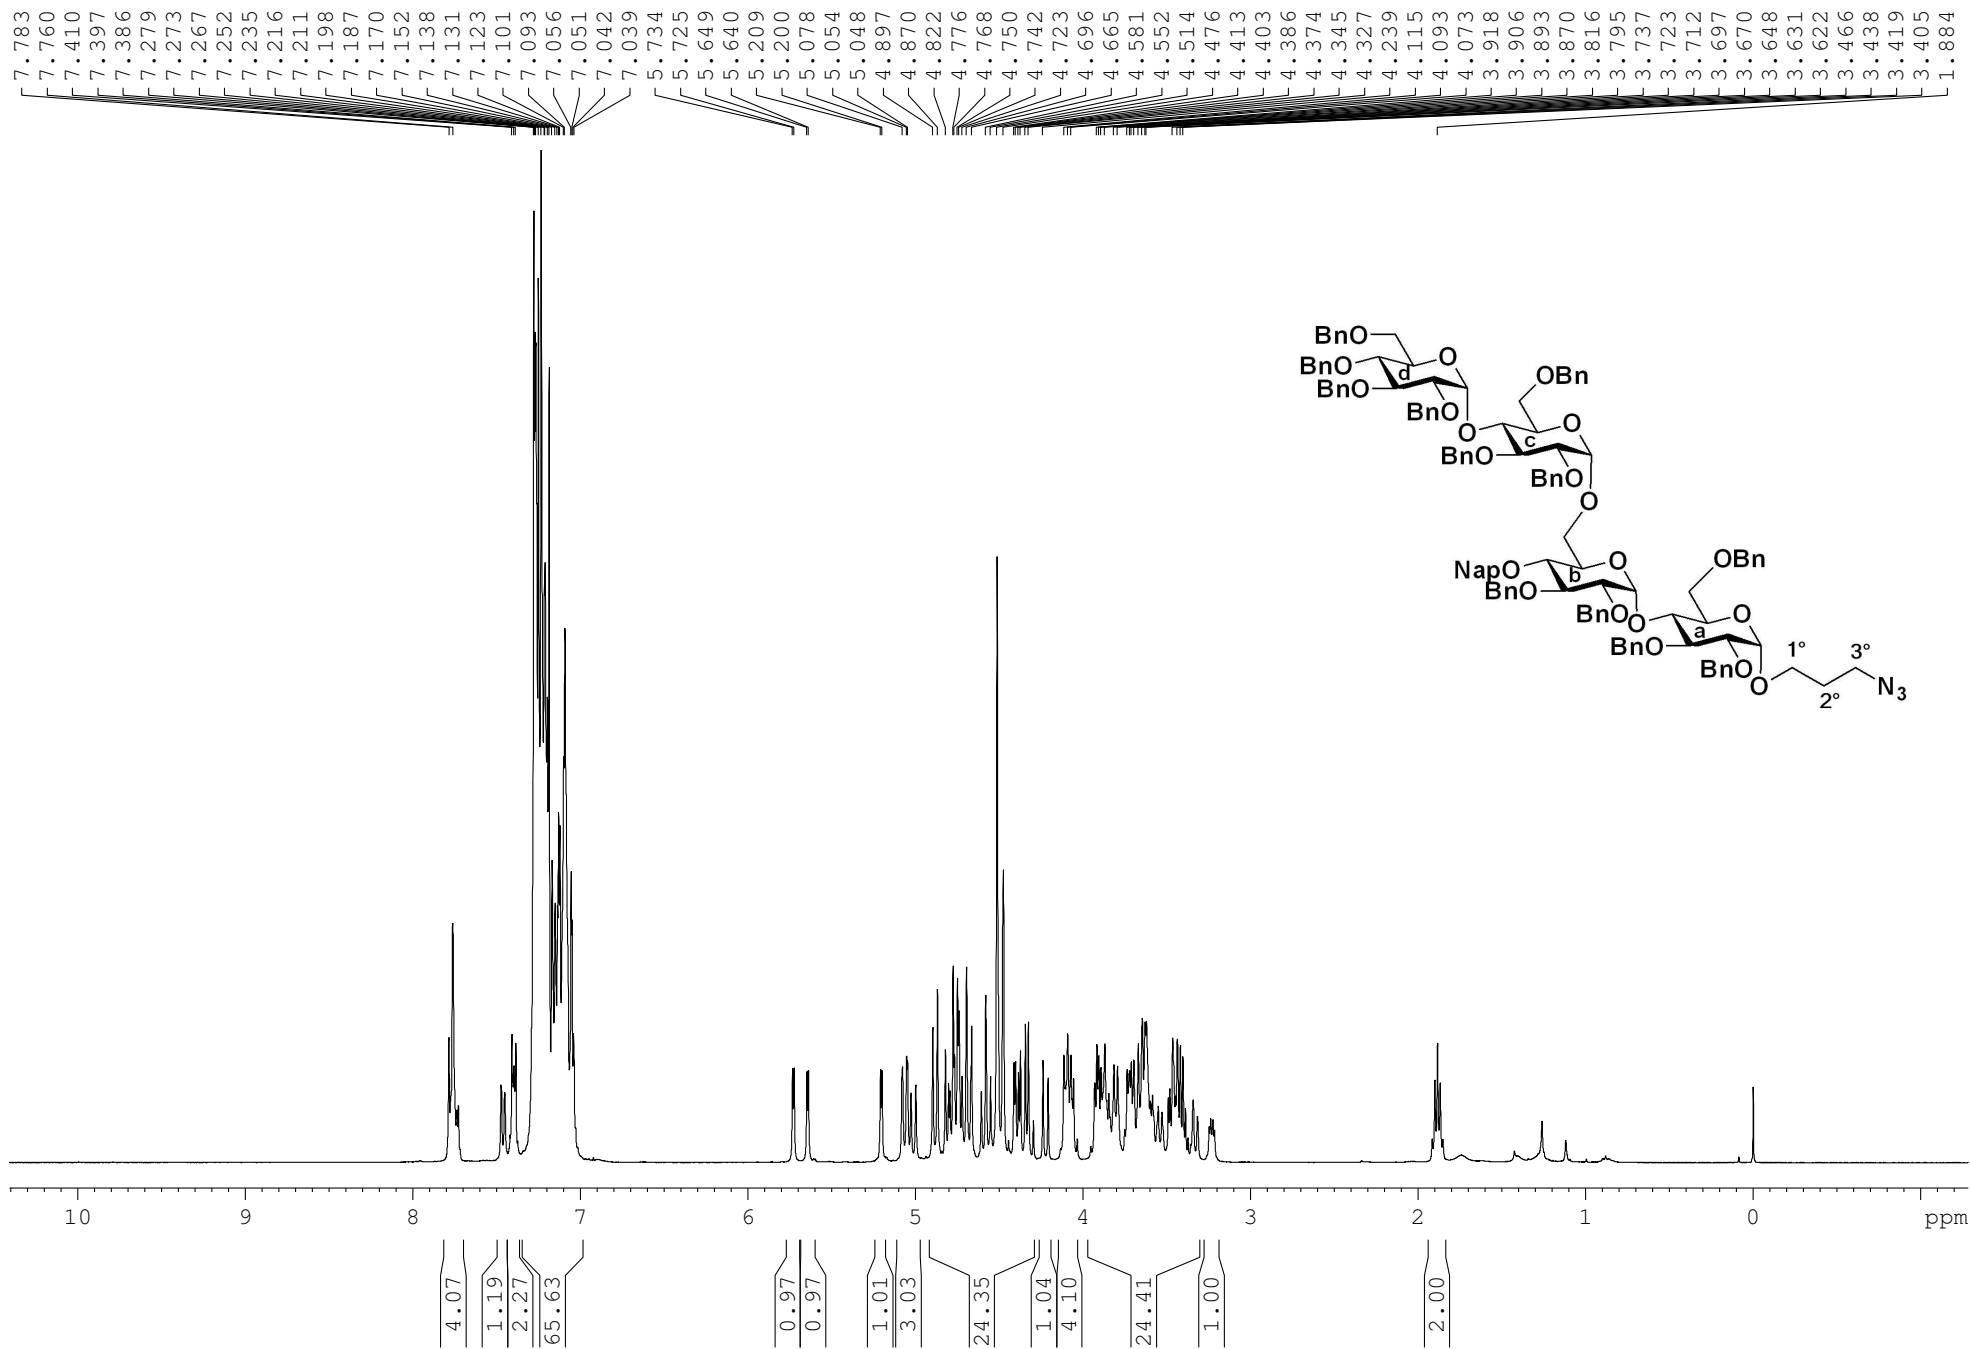

S165

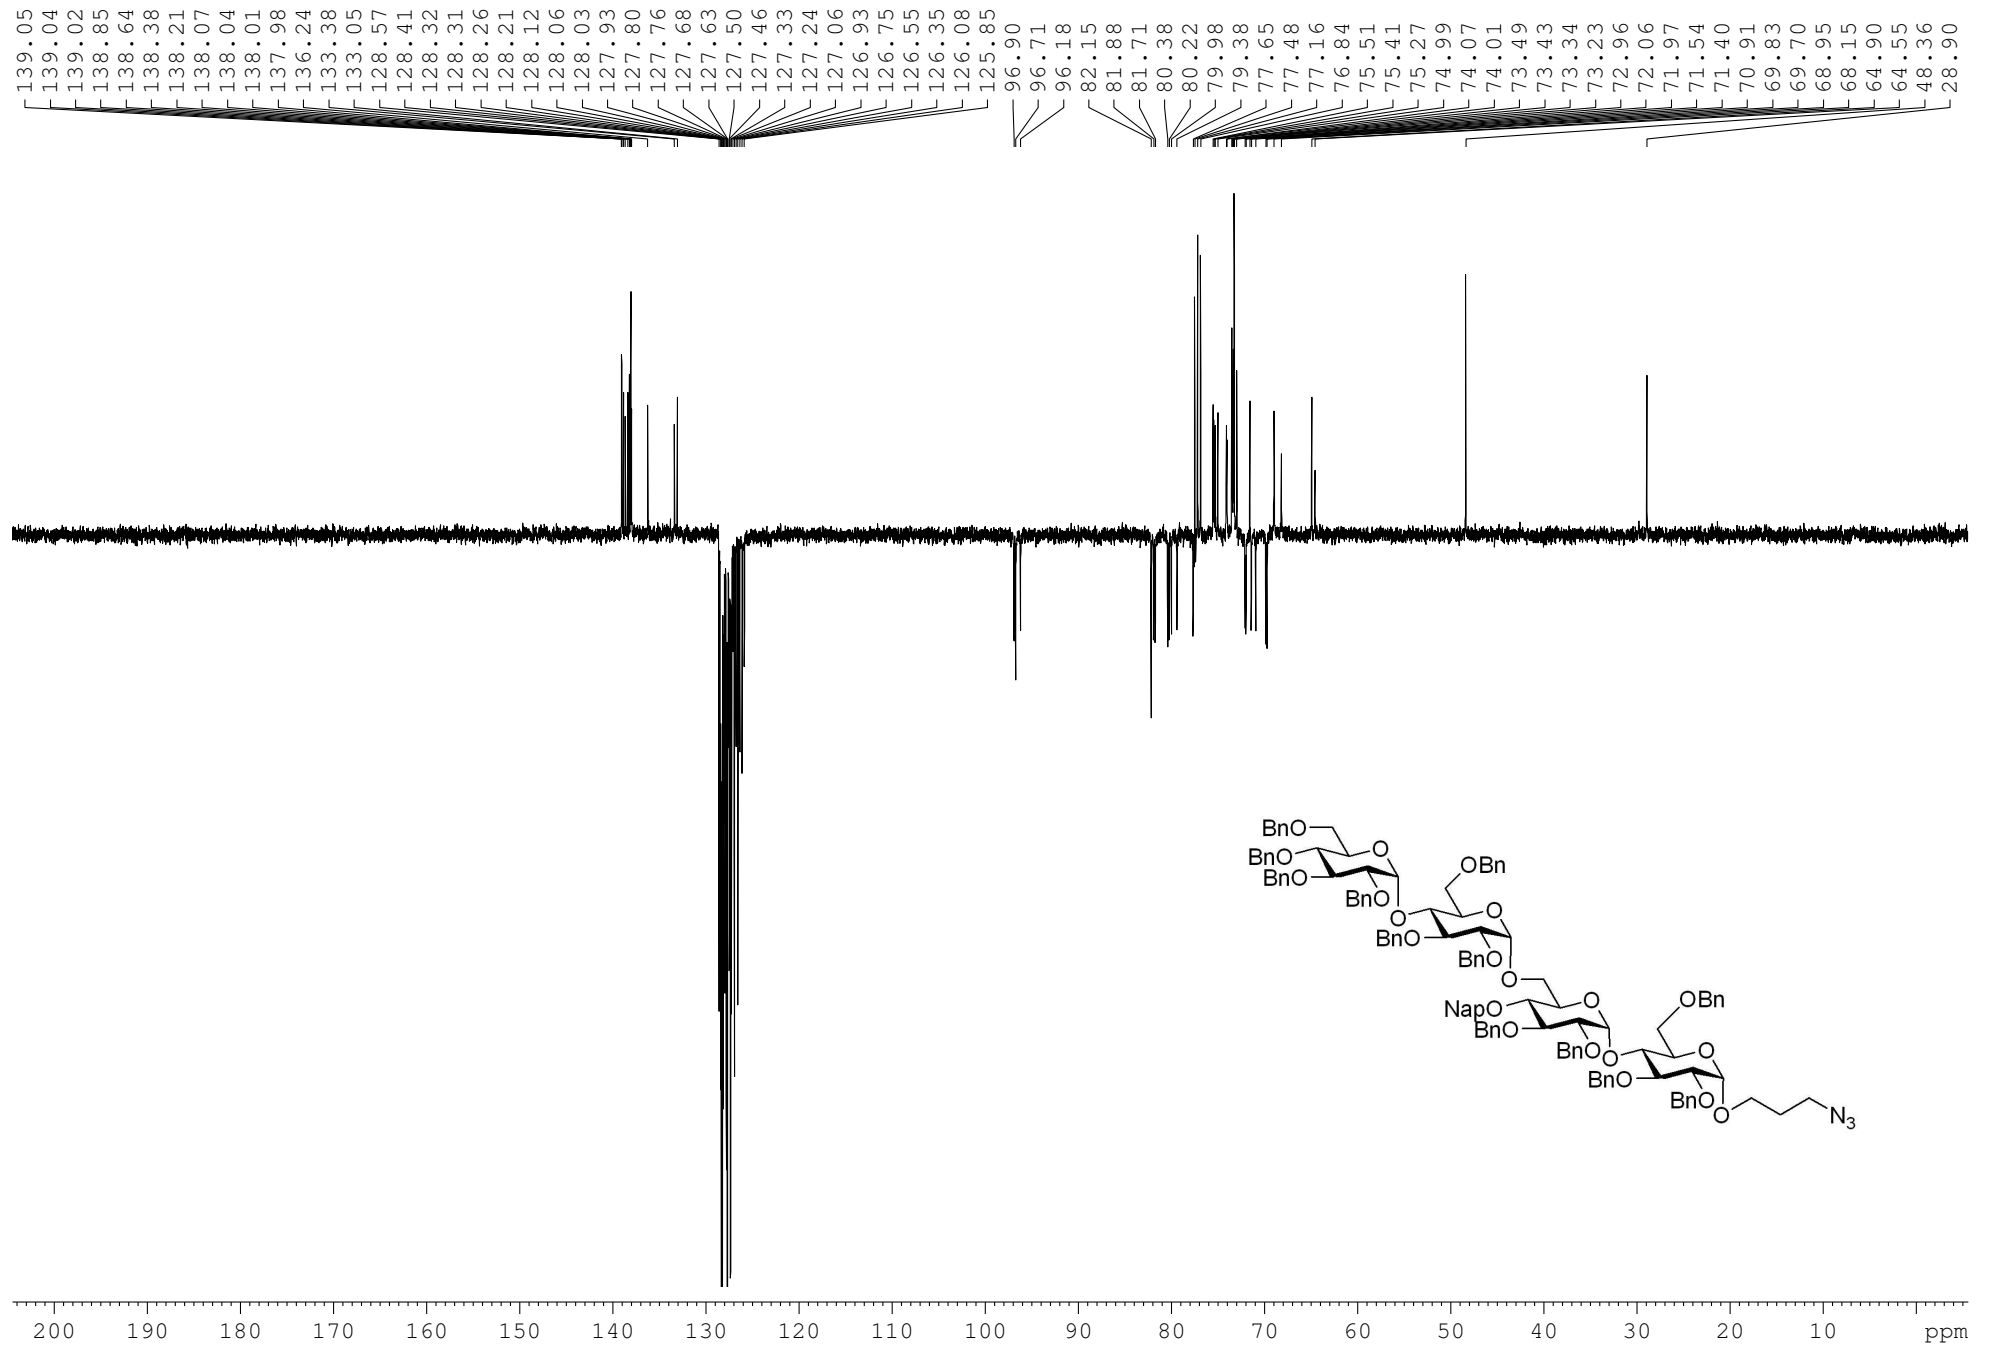

- 139.05
- 139.04
- 139.02
- 138.85
- 138.64
- 138.38
- 138.21
- 138.07
- 138.04
- 138.01
- 137.98
- 136.24
- 133.38
- 133.05
- 128.57
- 128.41
- 128.32
- 128.31
- 128.26
- 128.21
- 128.12
- 128.06
- 128.03
- 127.93
- 127.80
- 127.76
- 127.68
- 127.63
- 127.50
- 127.46
- 127.33
- 127.24
- 127.06
- 126.93
- 126.75
- 126.55
- 126.35
- 126.08
- 125.85
- 96.90
- 96.71
- 96.18
- 82.15
- 81.88
- 81.71
- 80.38
- 80.22
- 79.98
- 79.38
- 77.65
- 77.48
- 77.16
- 76.84
- 75.51
- 75.41
- 75.27
- 74.99
- 74.07
- 74.01
- 73.49
- 73.43
- 73.34
- 73.23
- 72.96
- 72.06
- 71.97
- 71.54
- 71.40
- 70.91
- 69.83
- 69.70
- 68.95
- 68.15
- 64.90
- 64.55
- 48.36
- 28.90

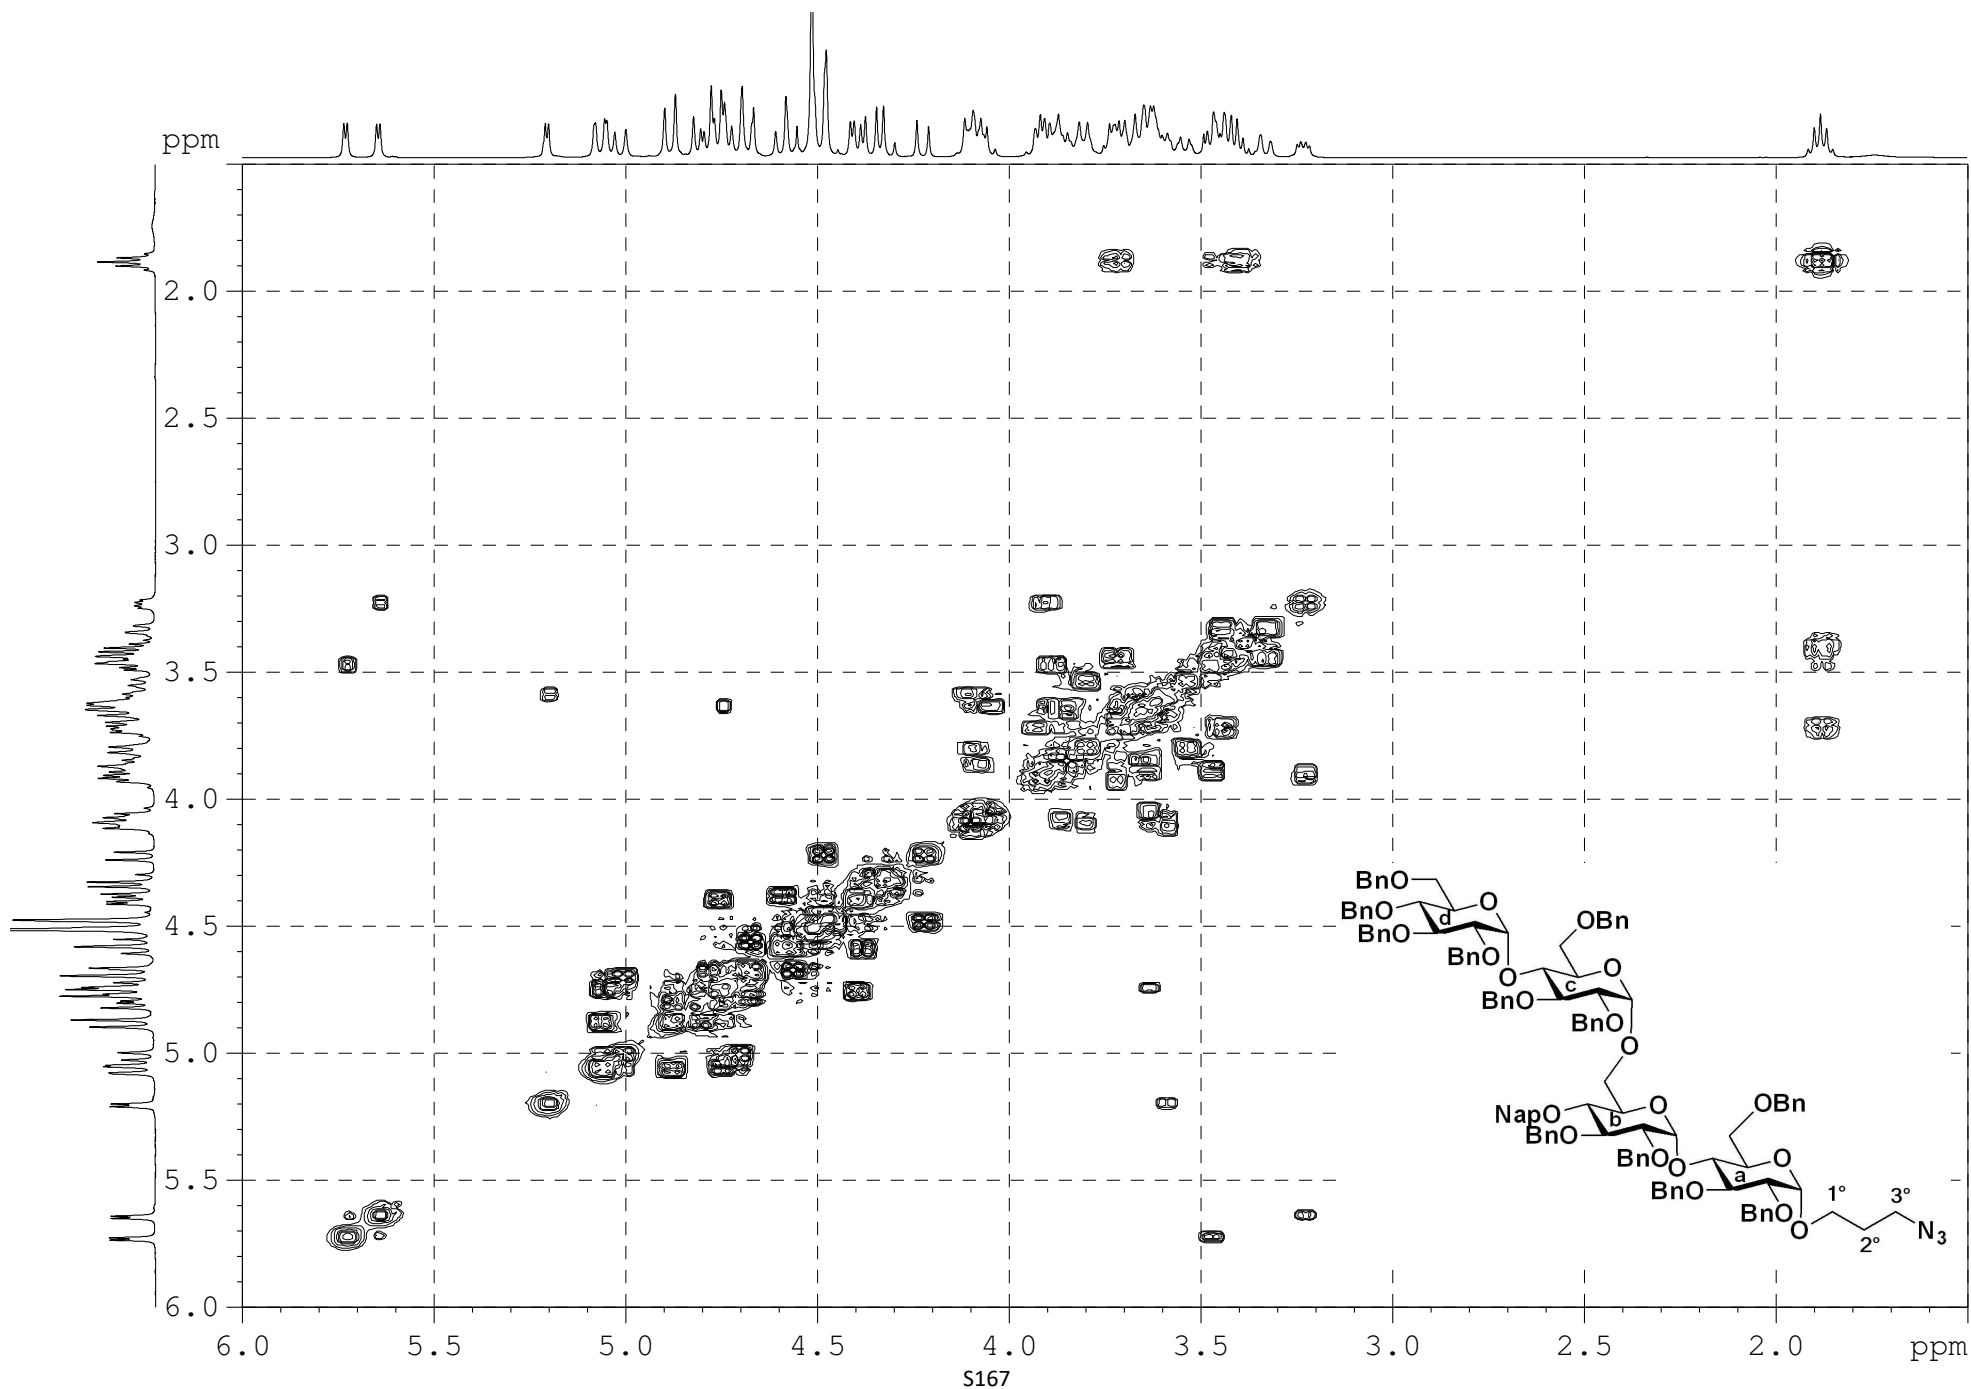

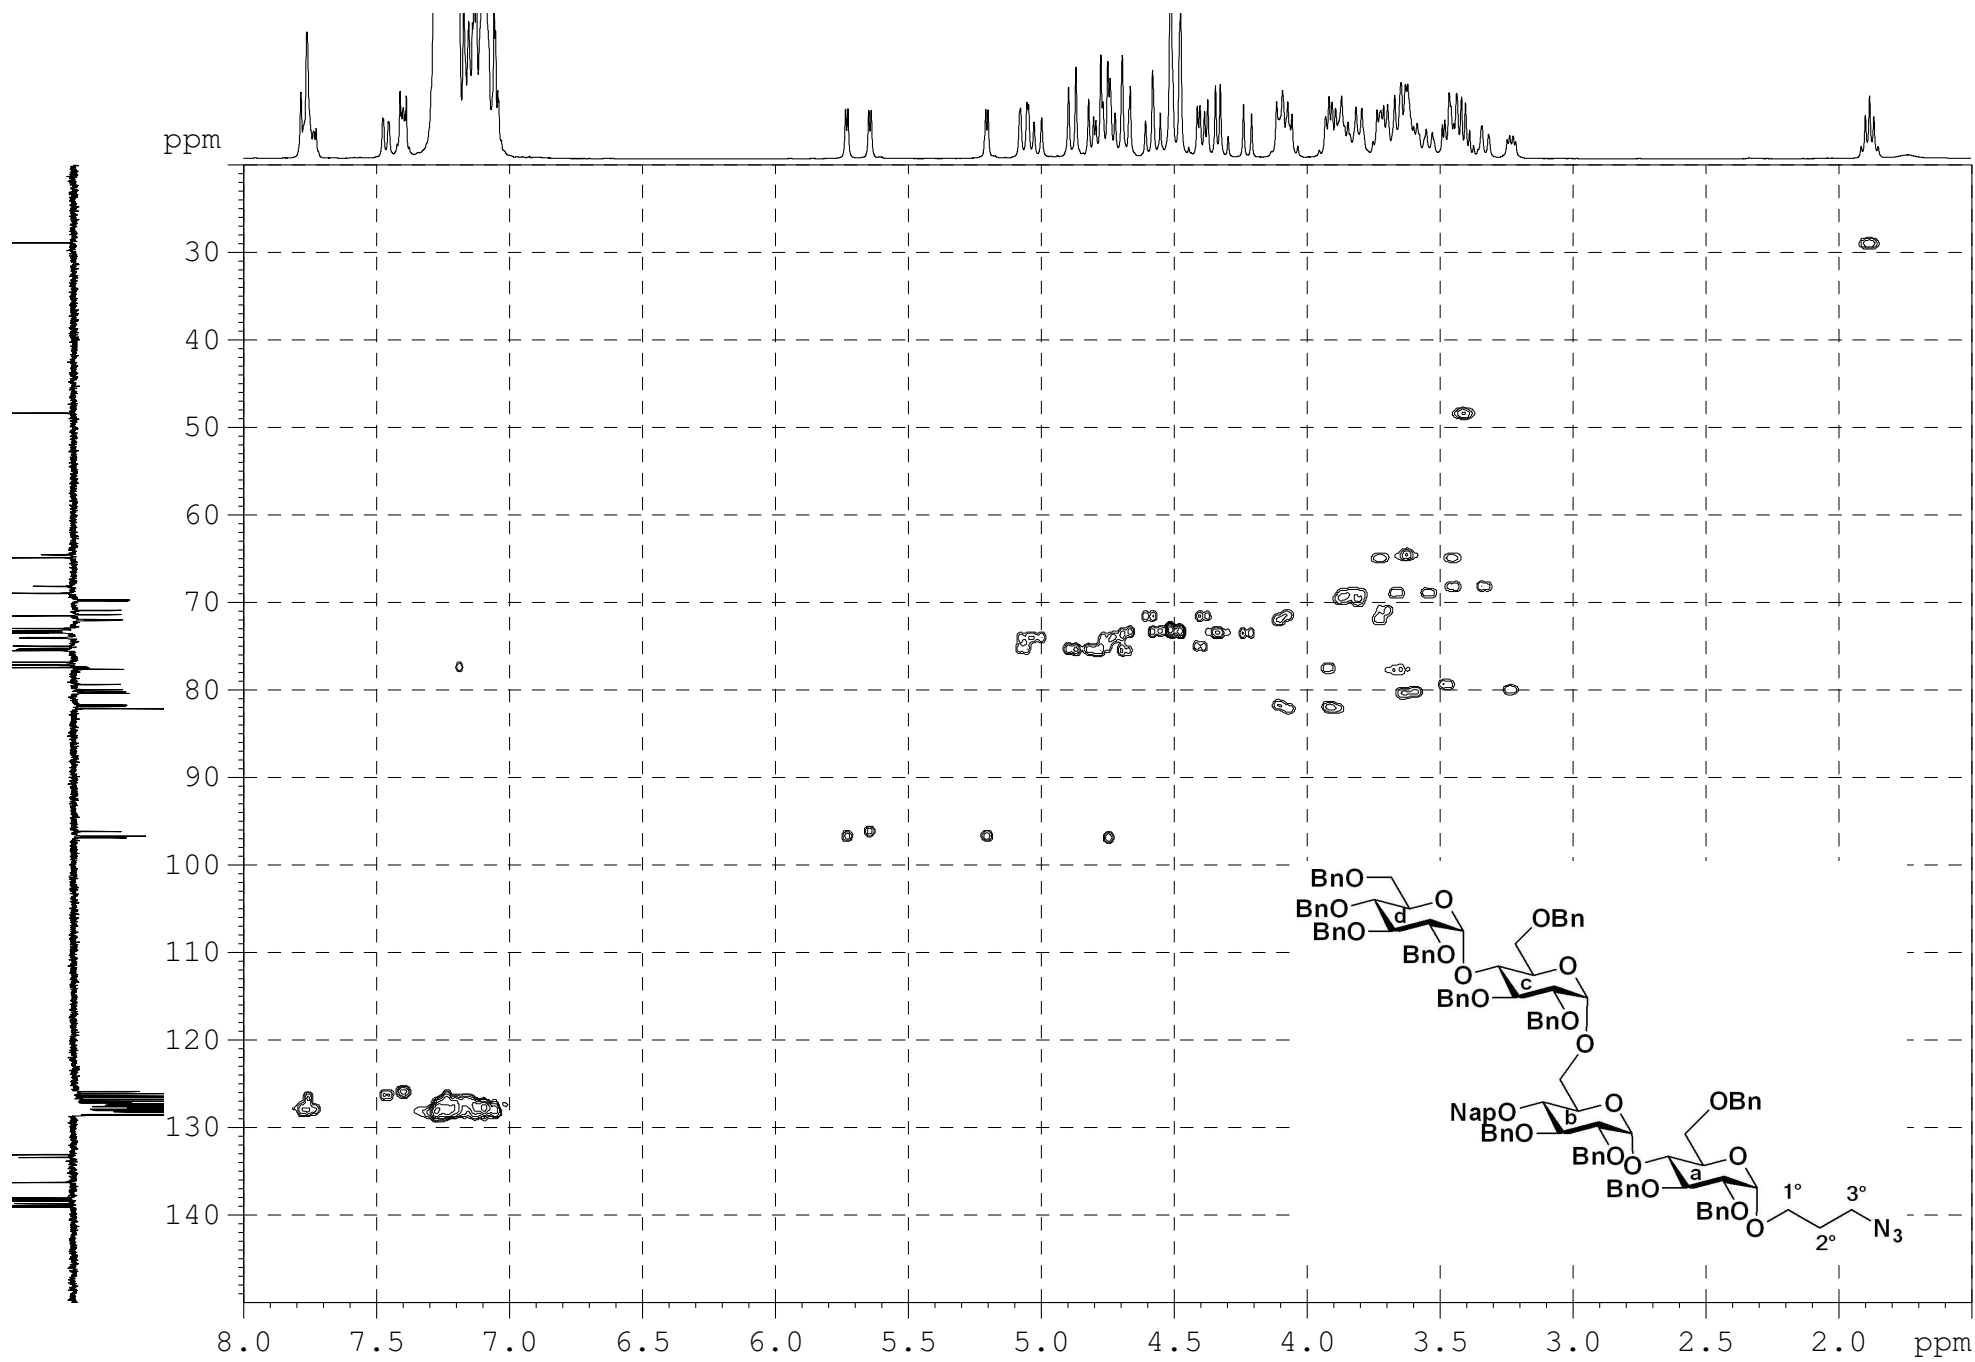

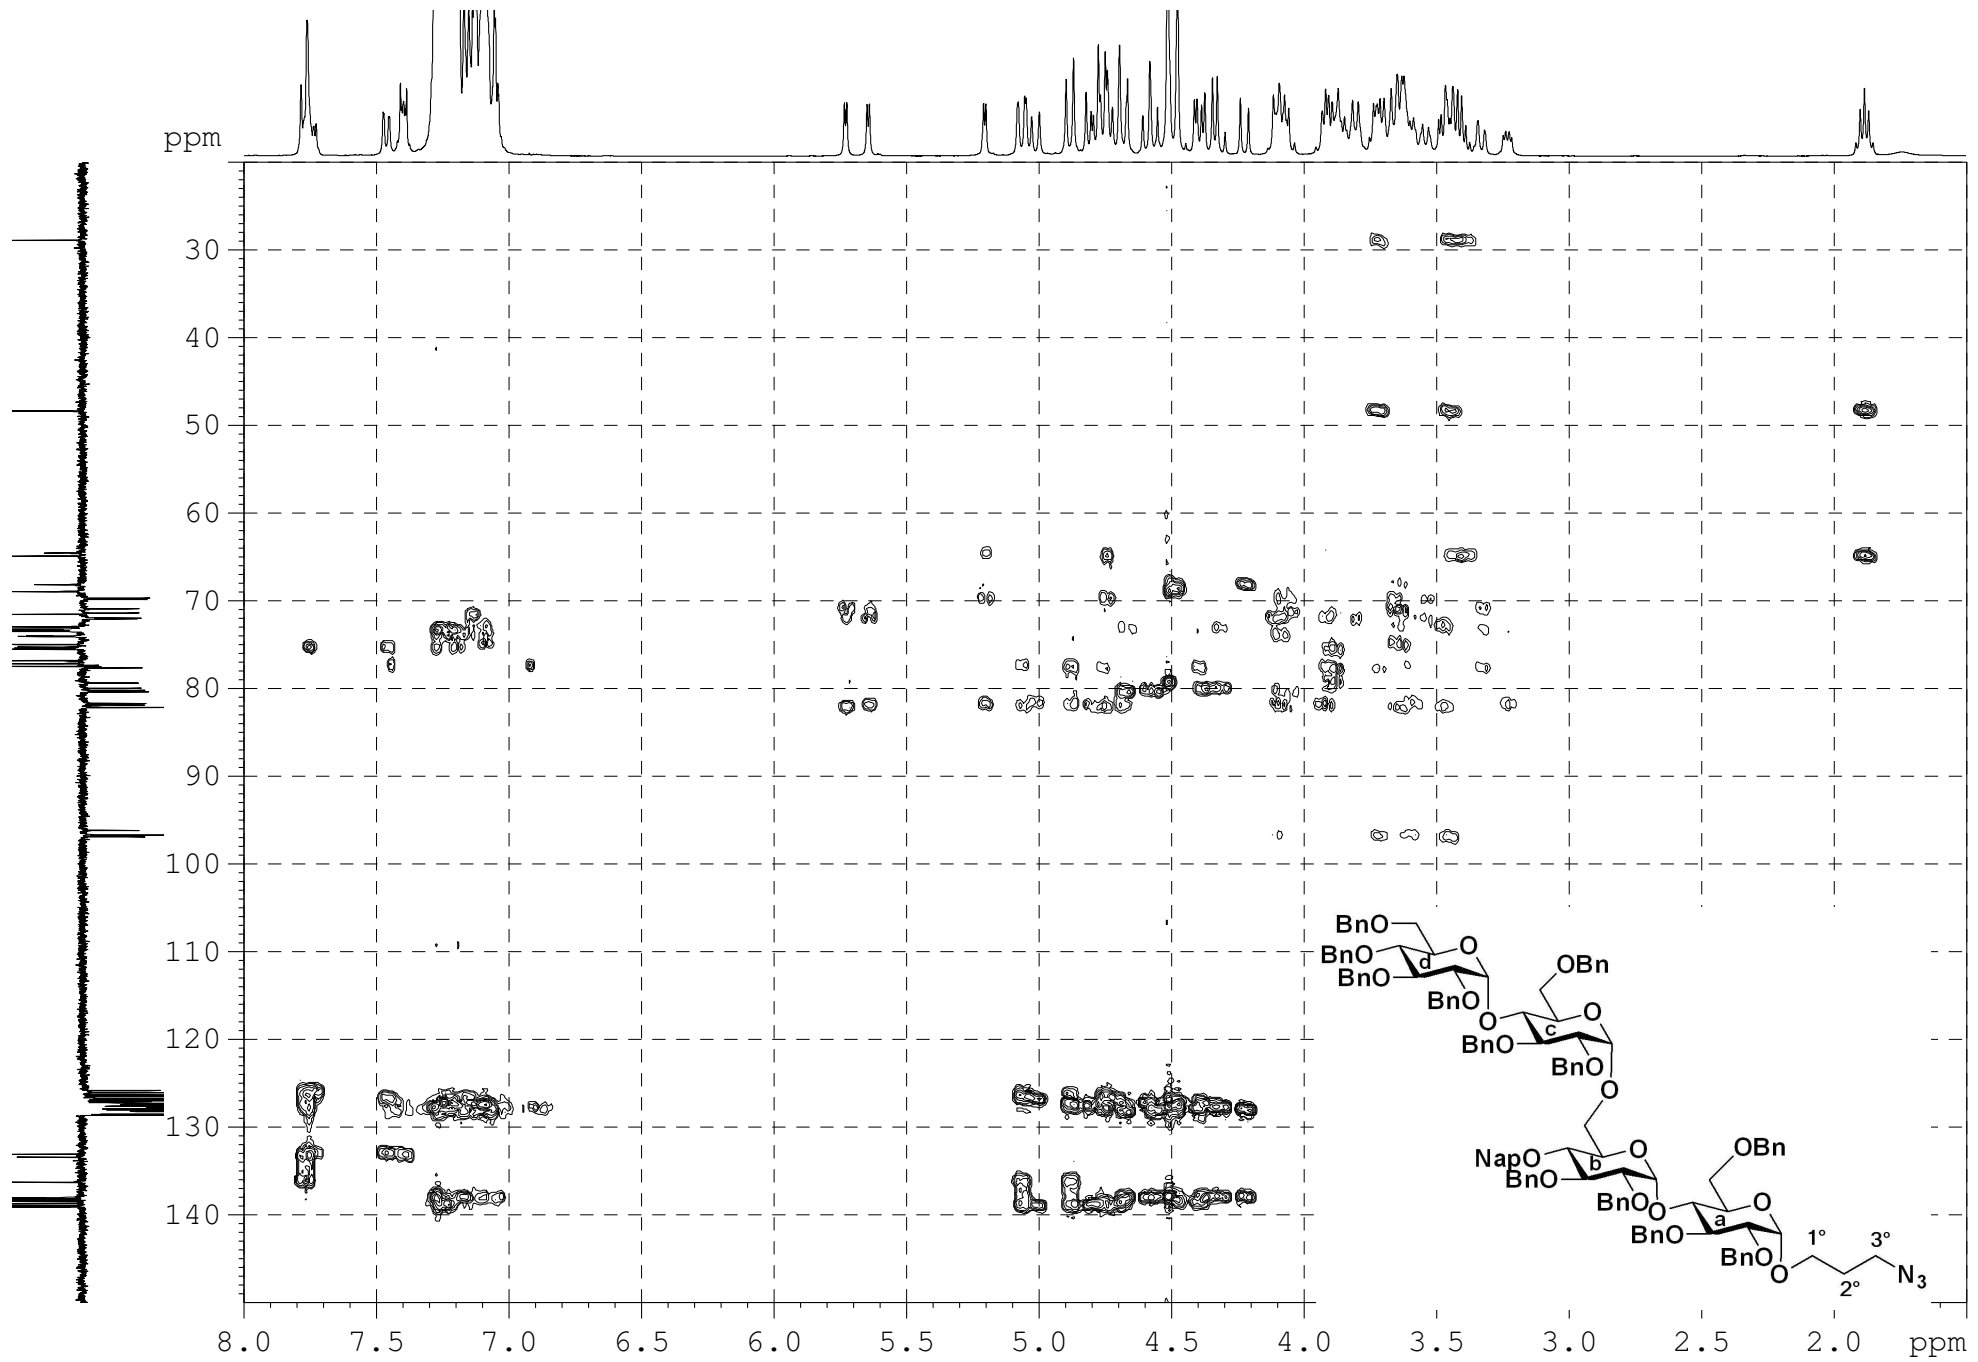

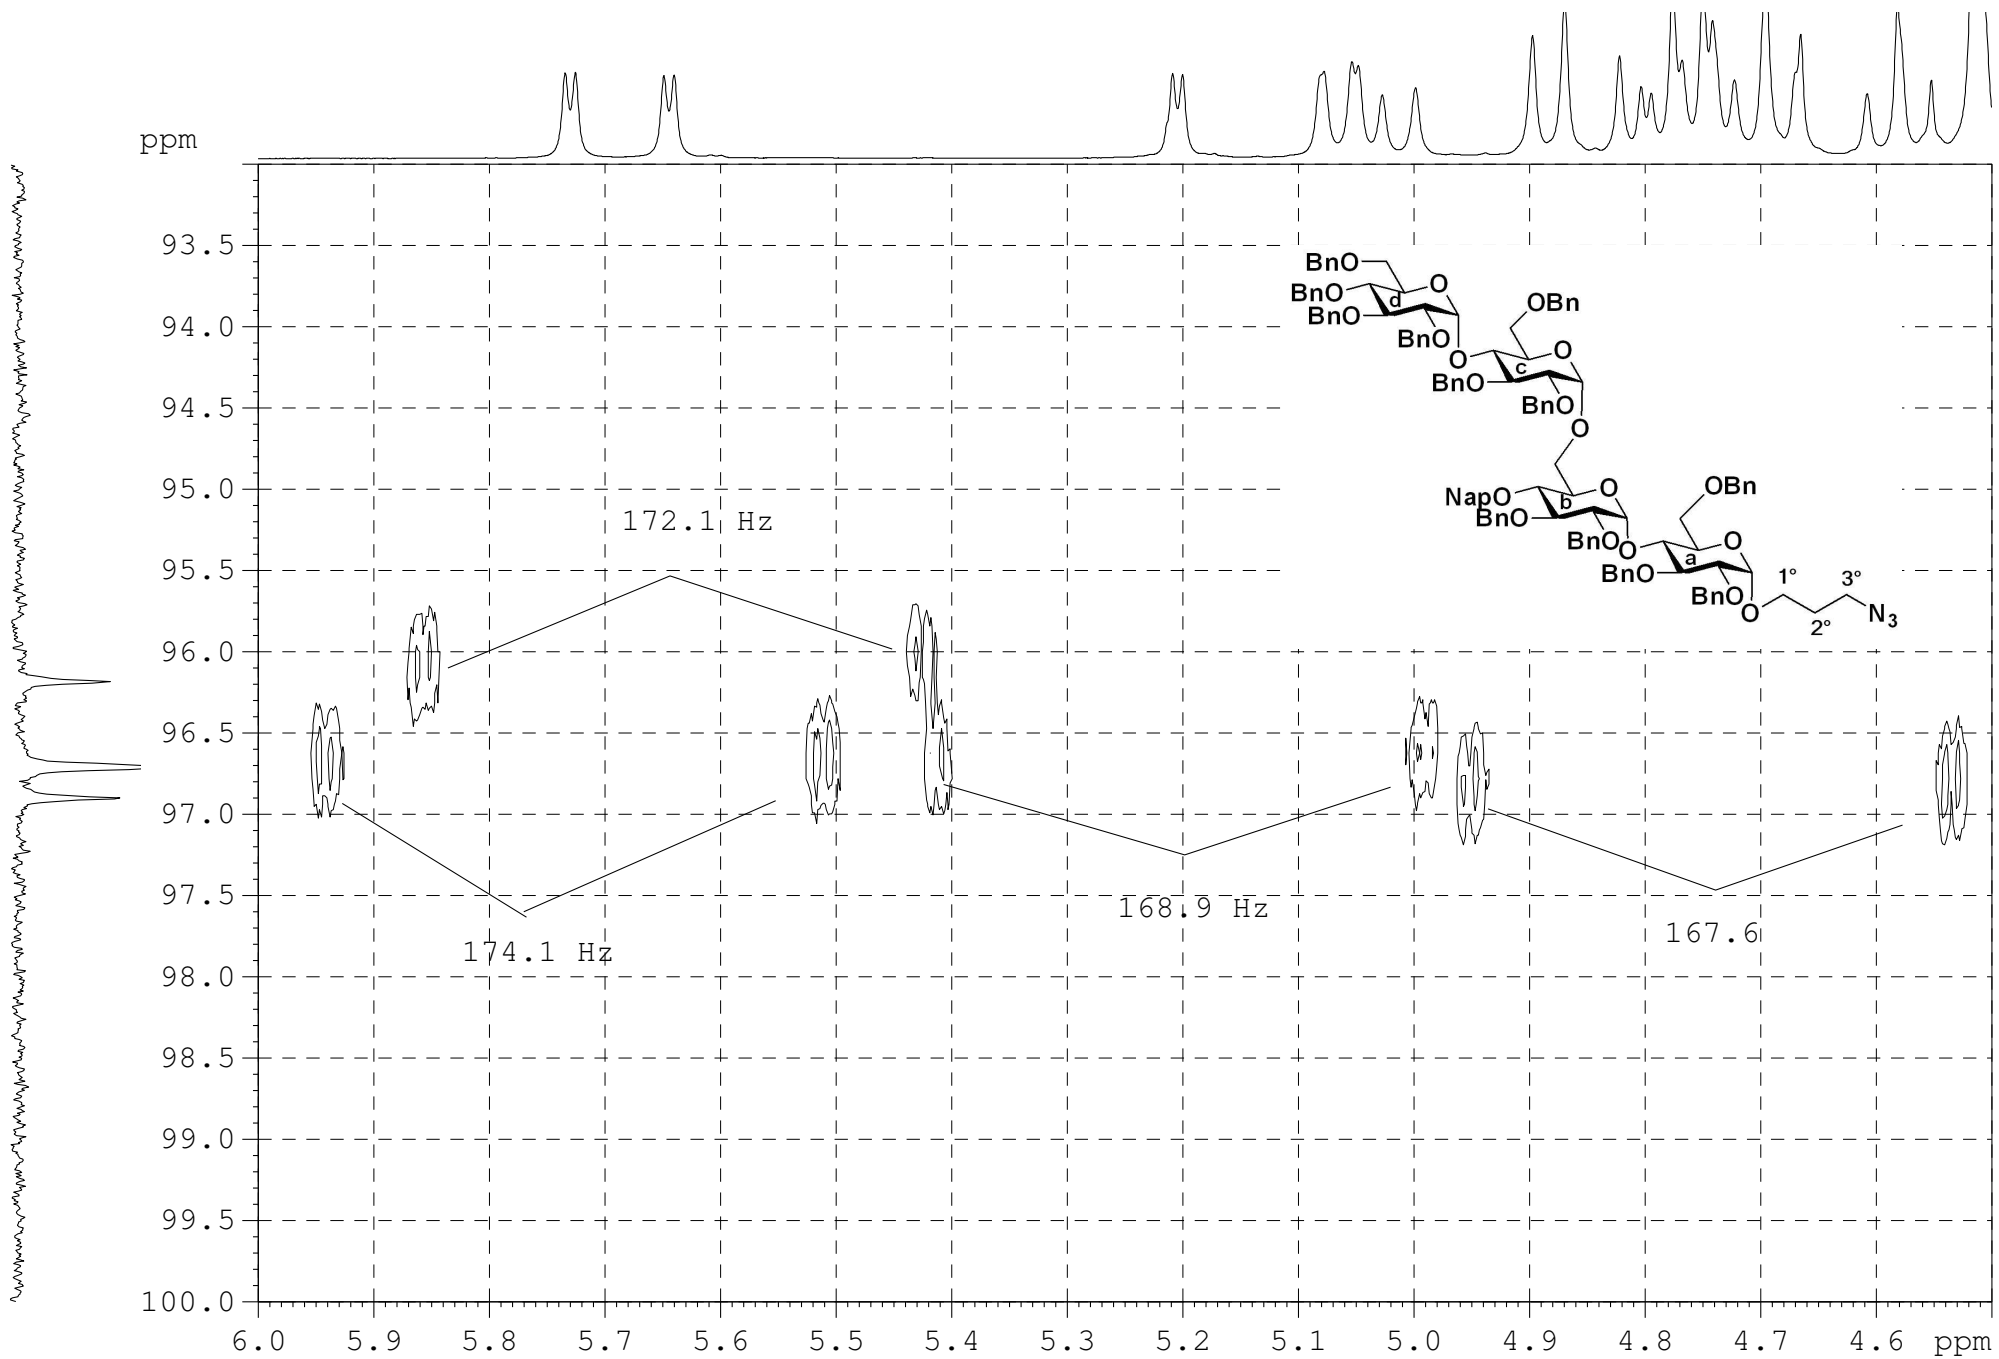

$^1\text{H-NMR}$ ,  $^{13}\text{C-APT}$ ,  $^1\text{H-}^1\text{H COSY}$ , HSQC, HMBC of **35**

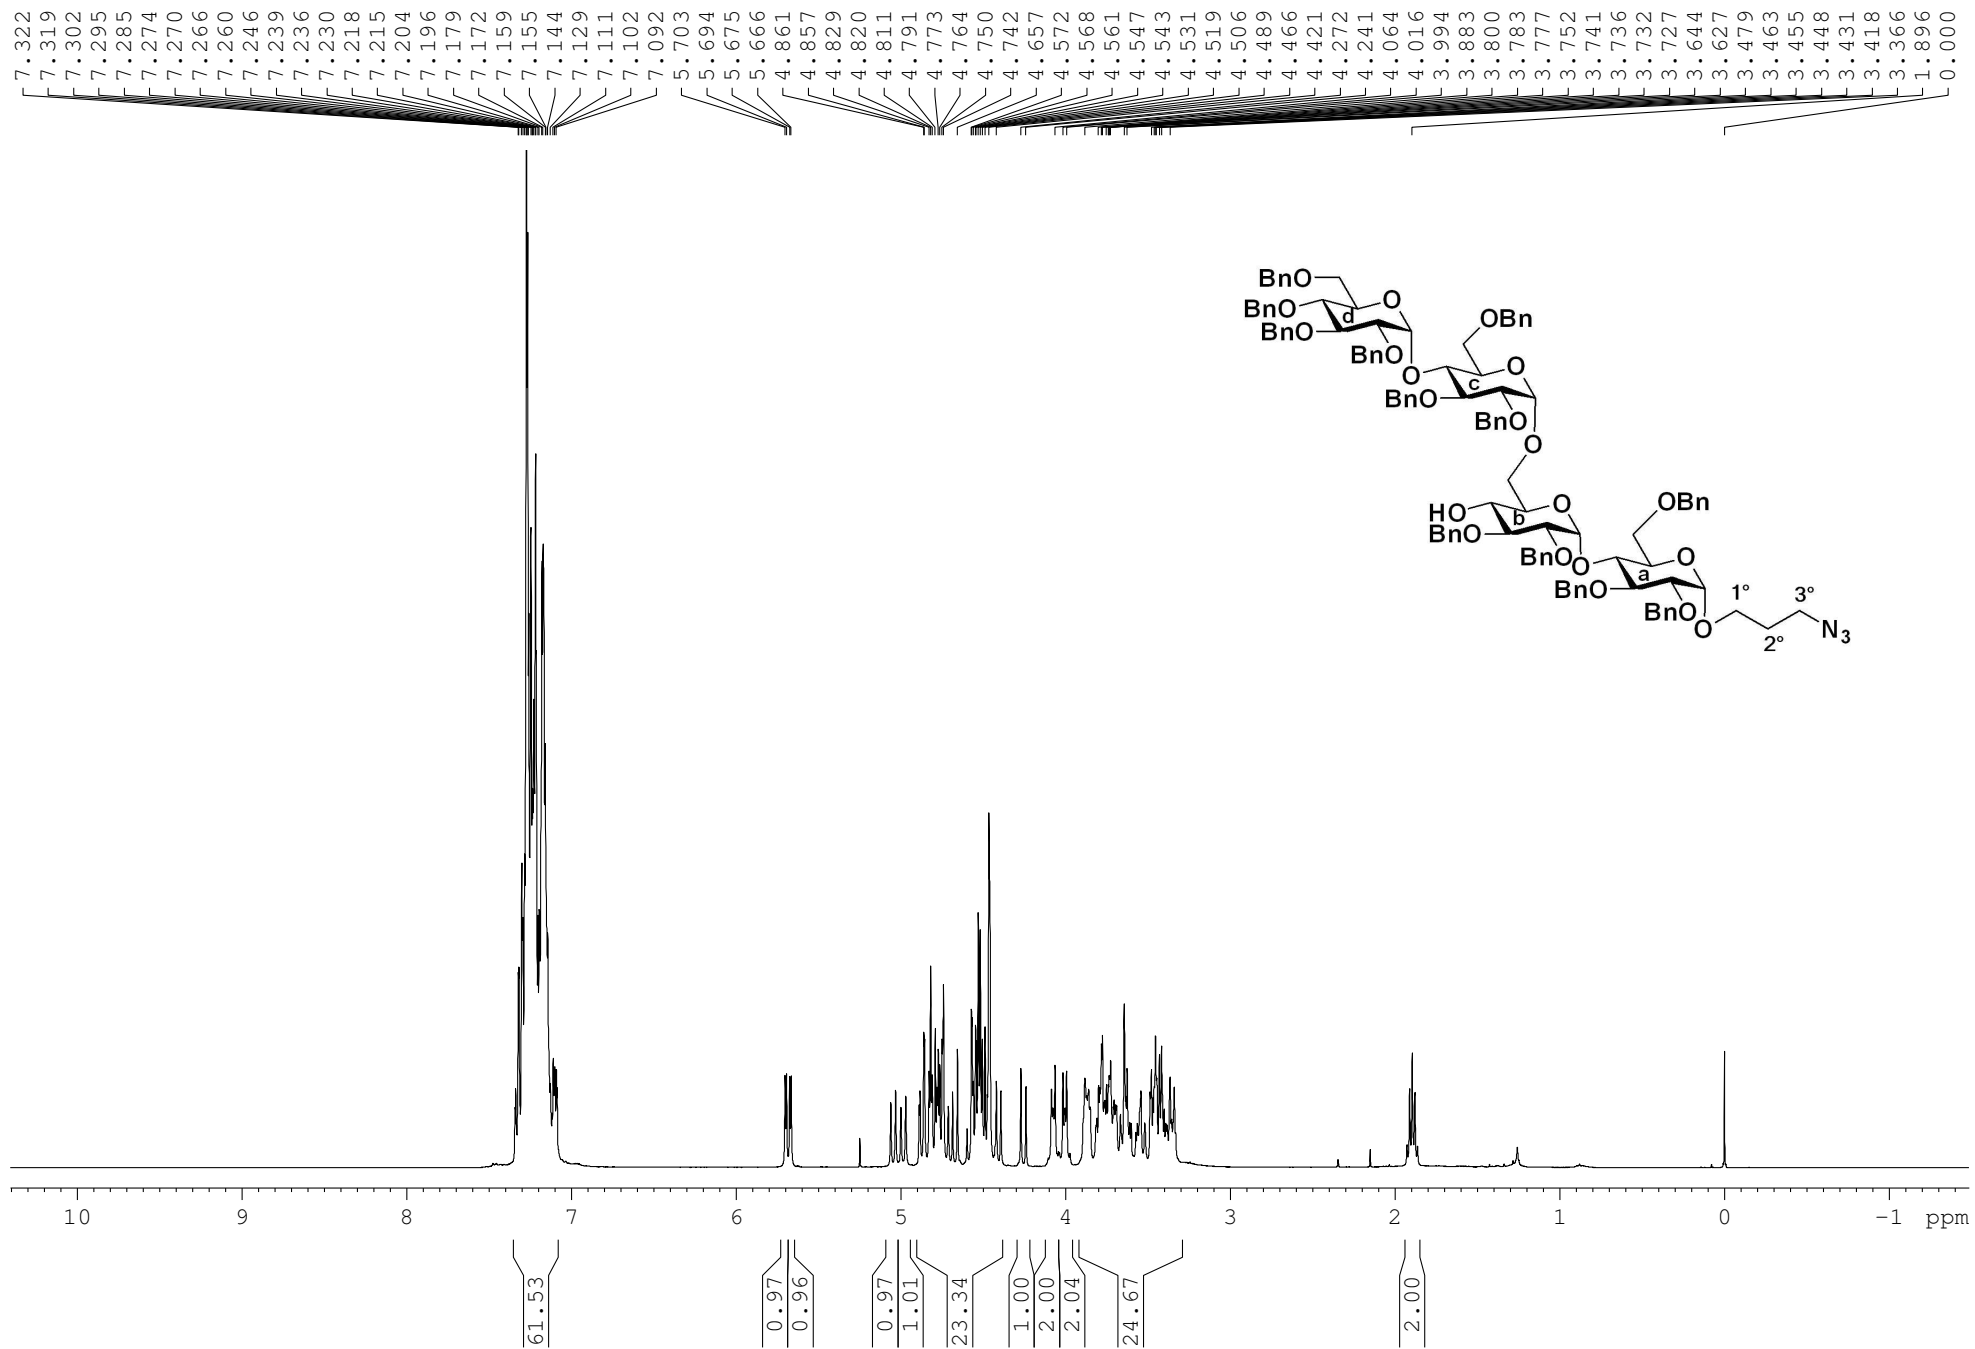

S171





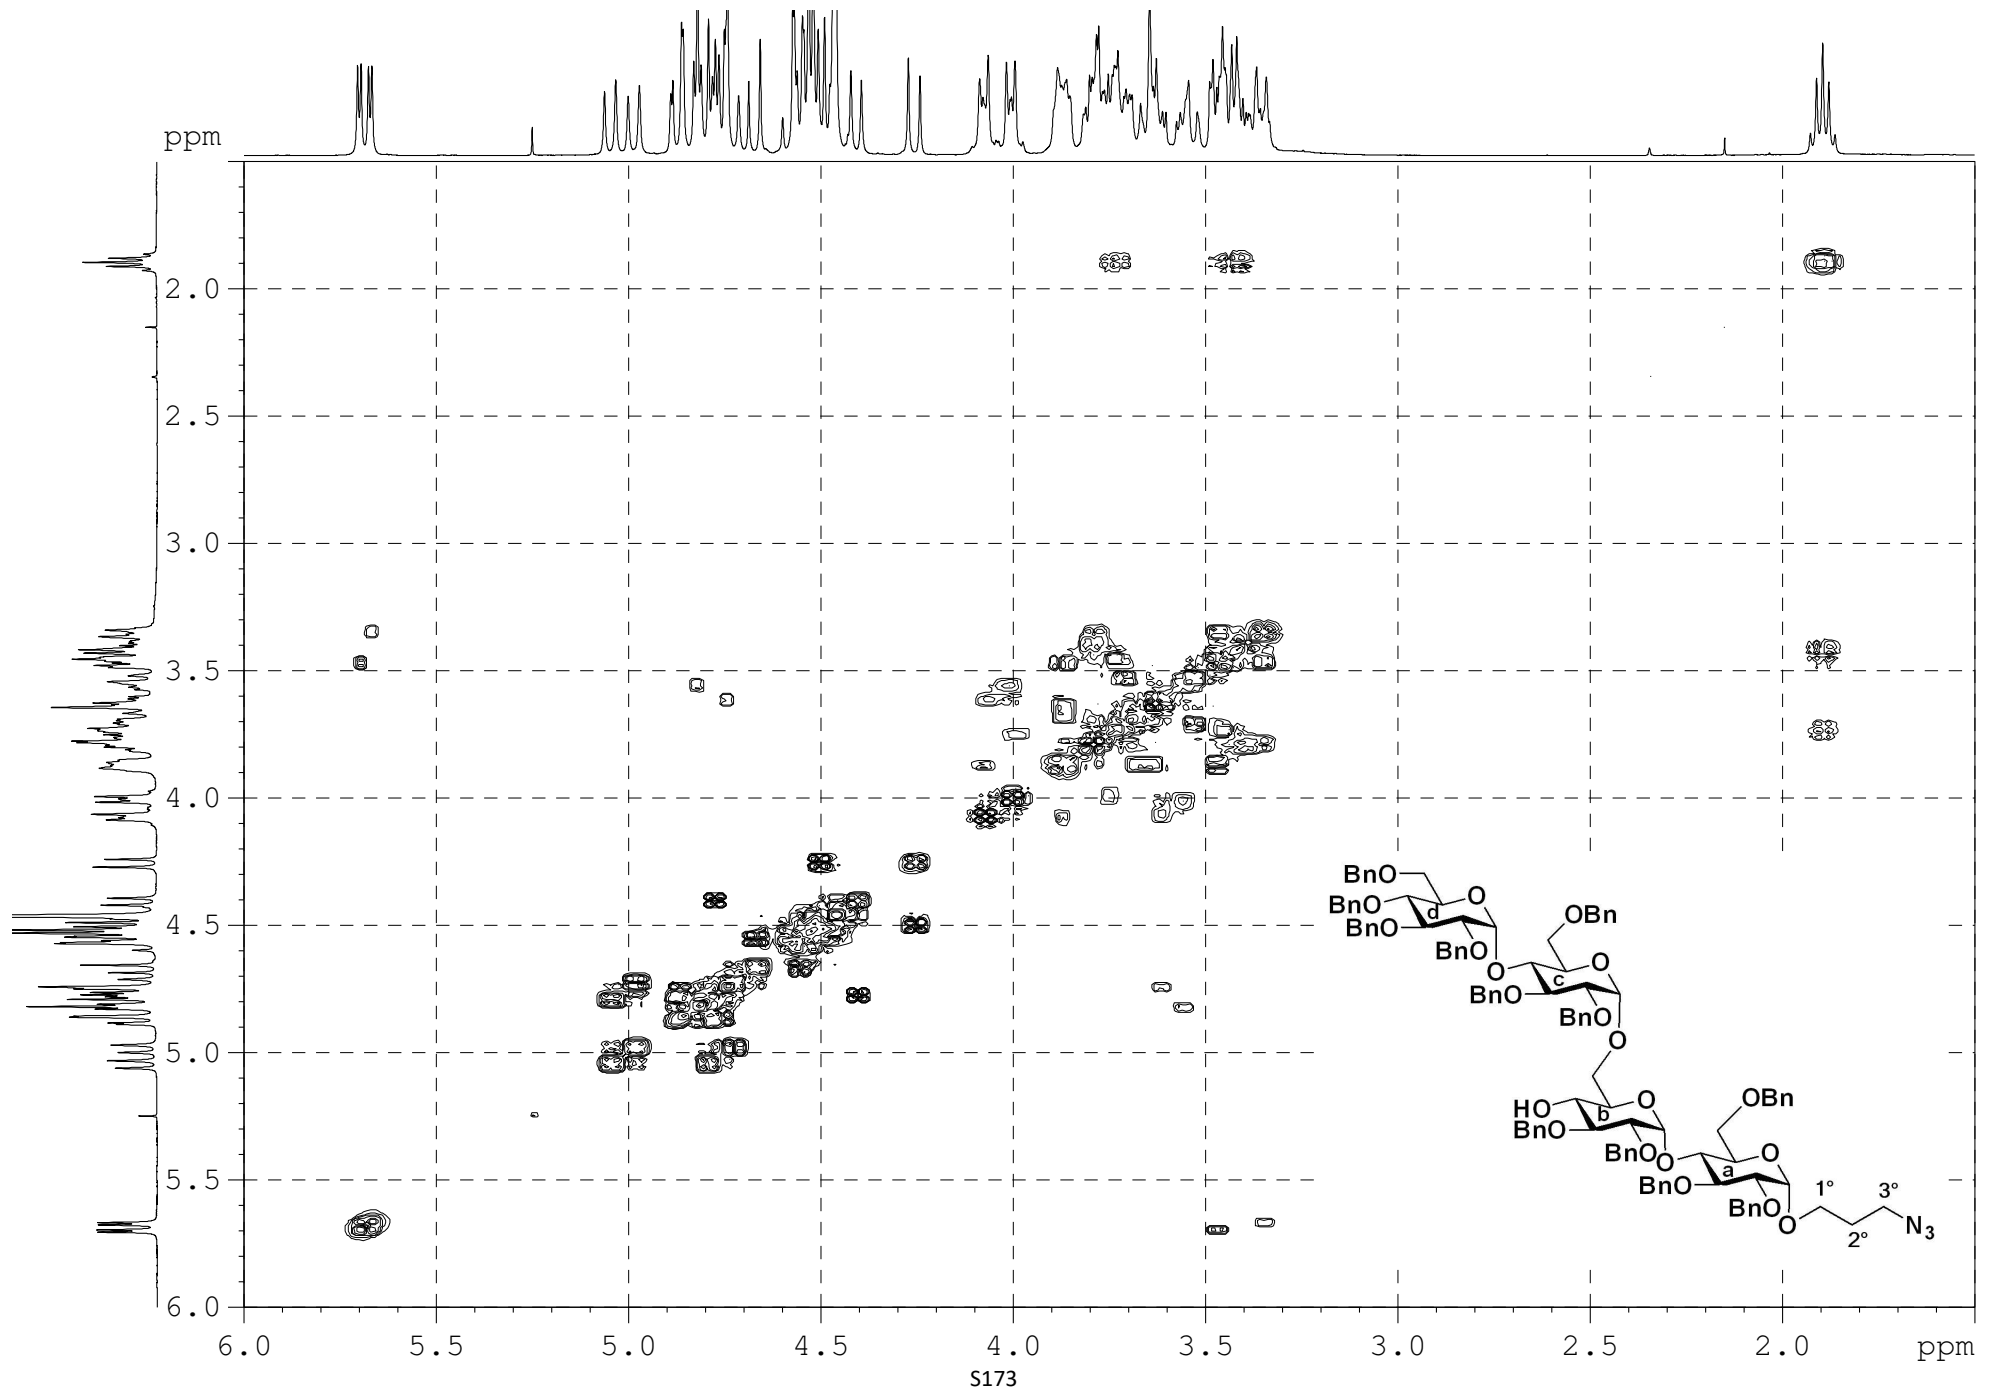

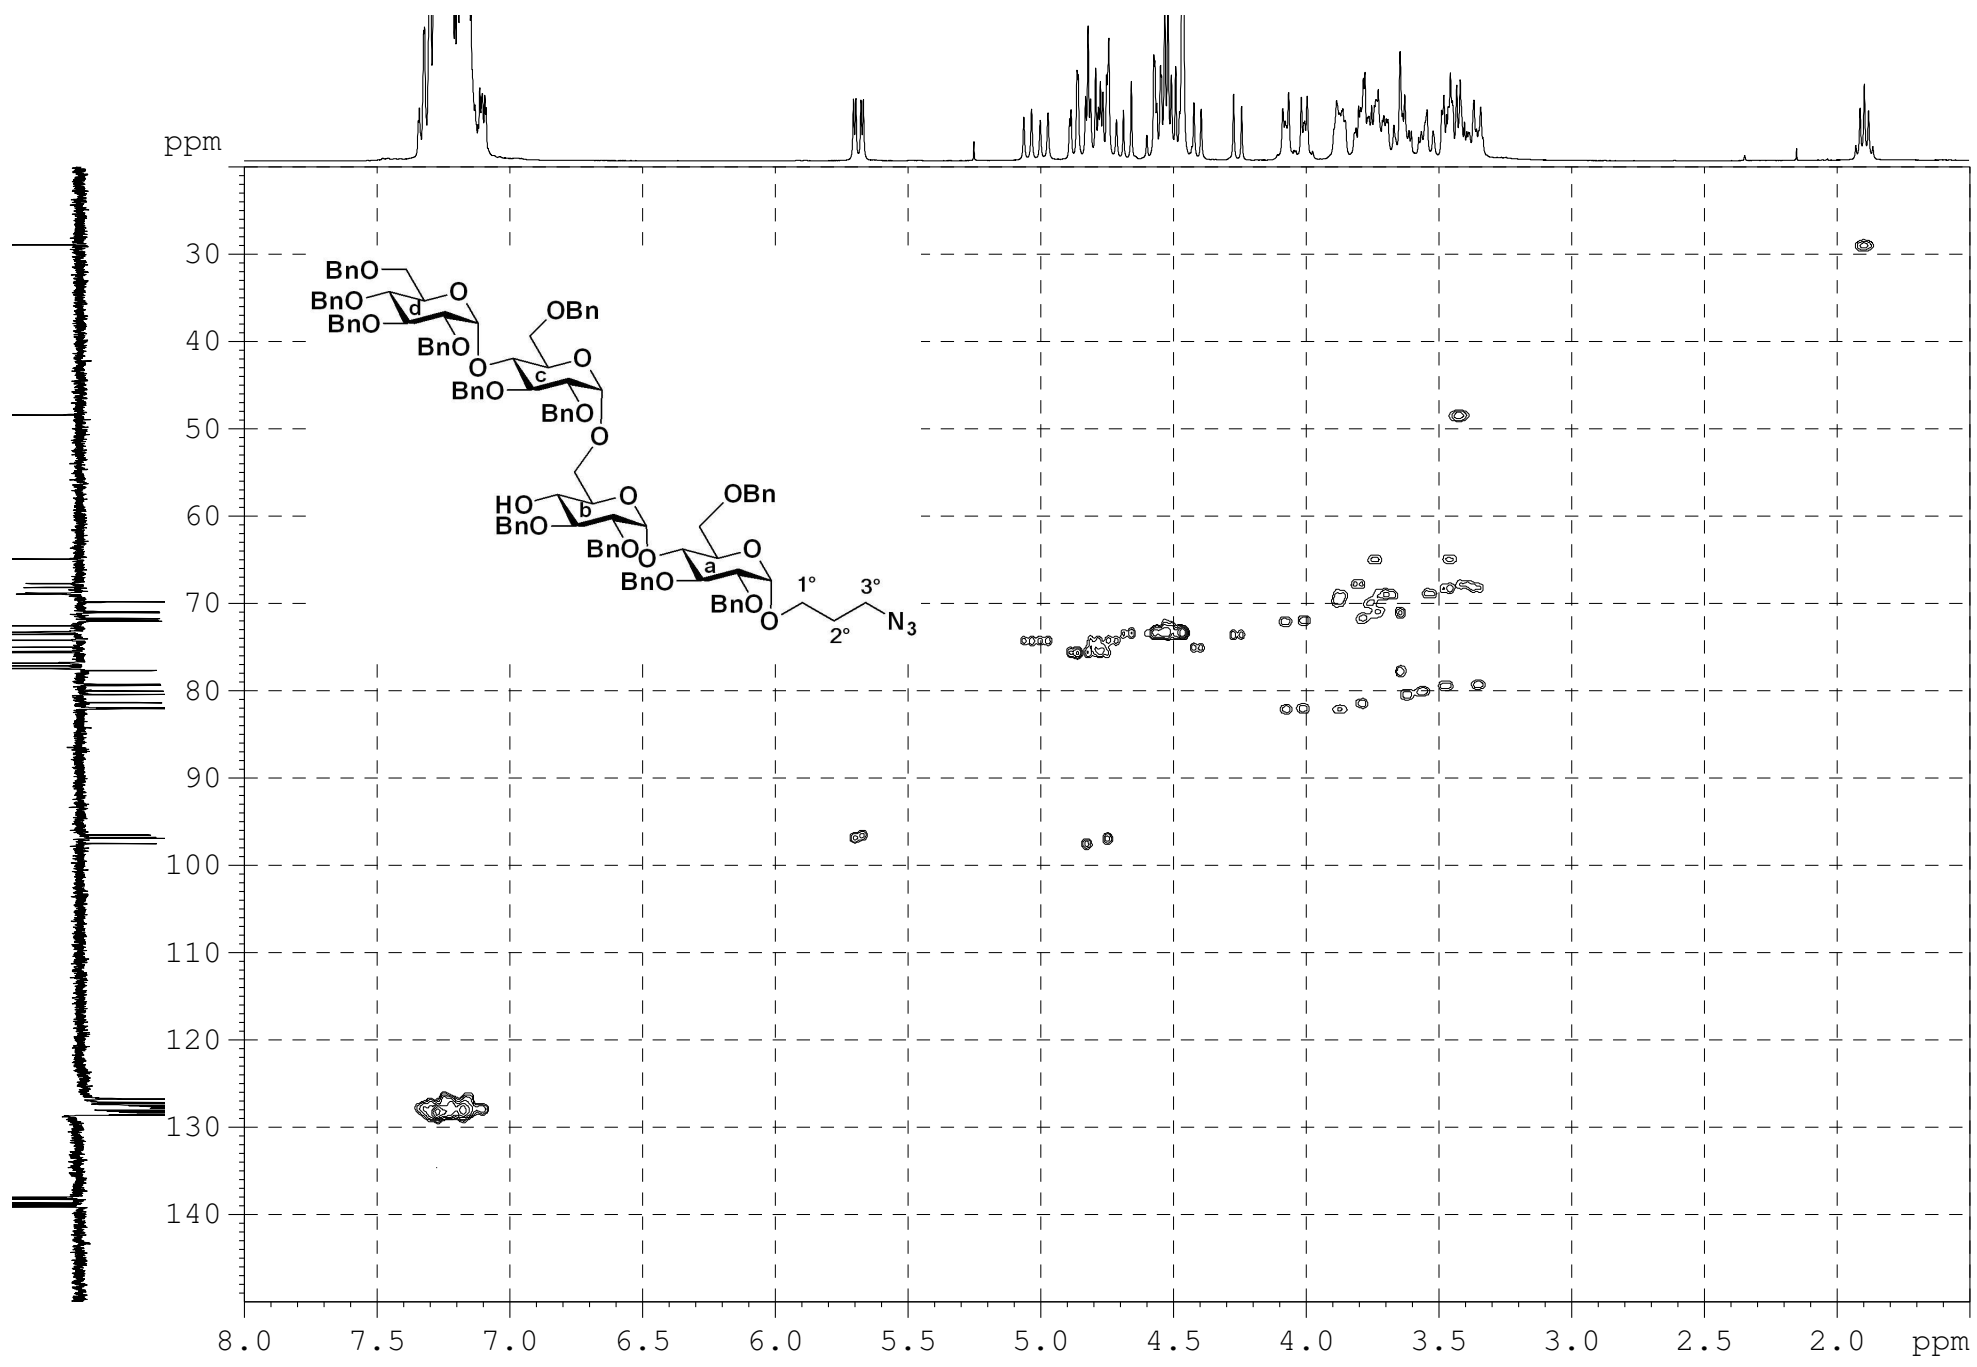

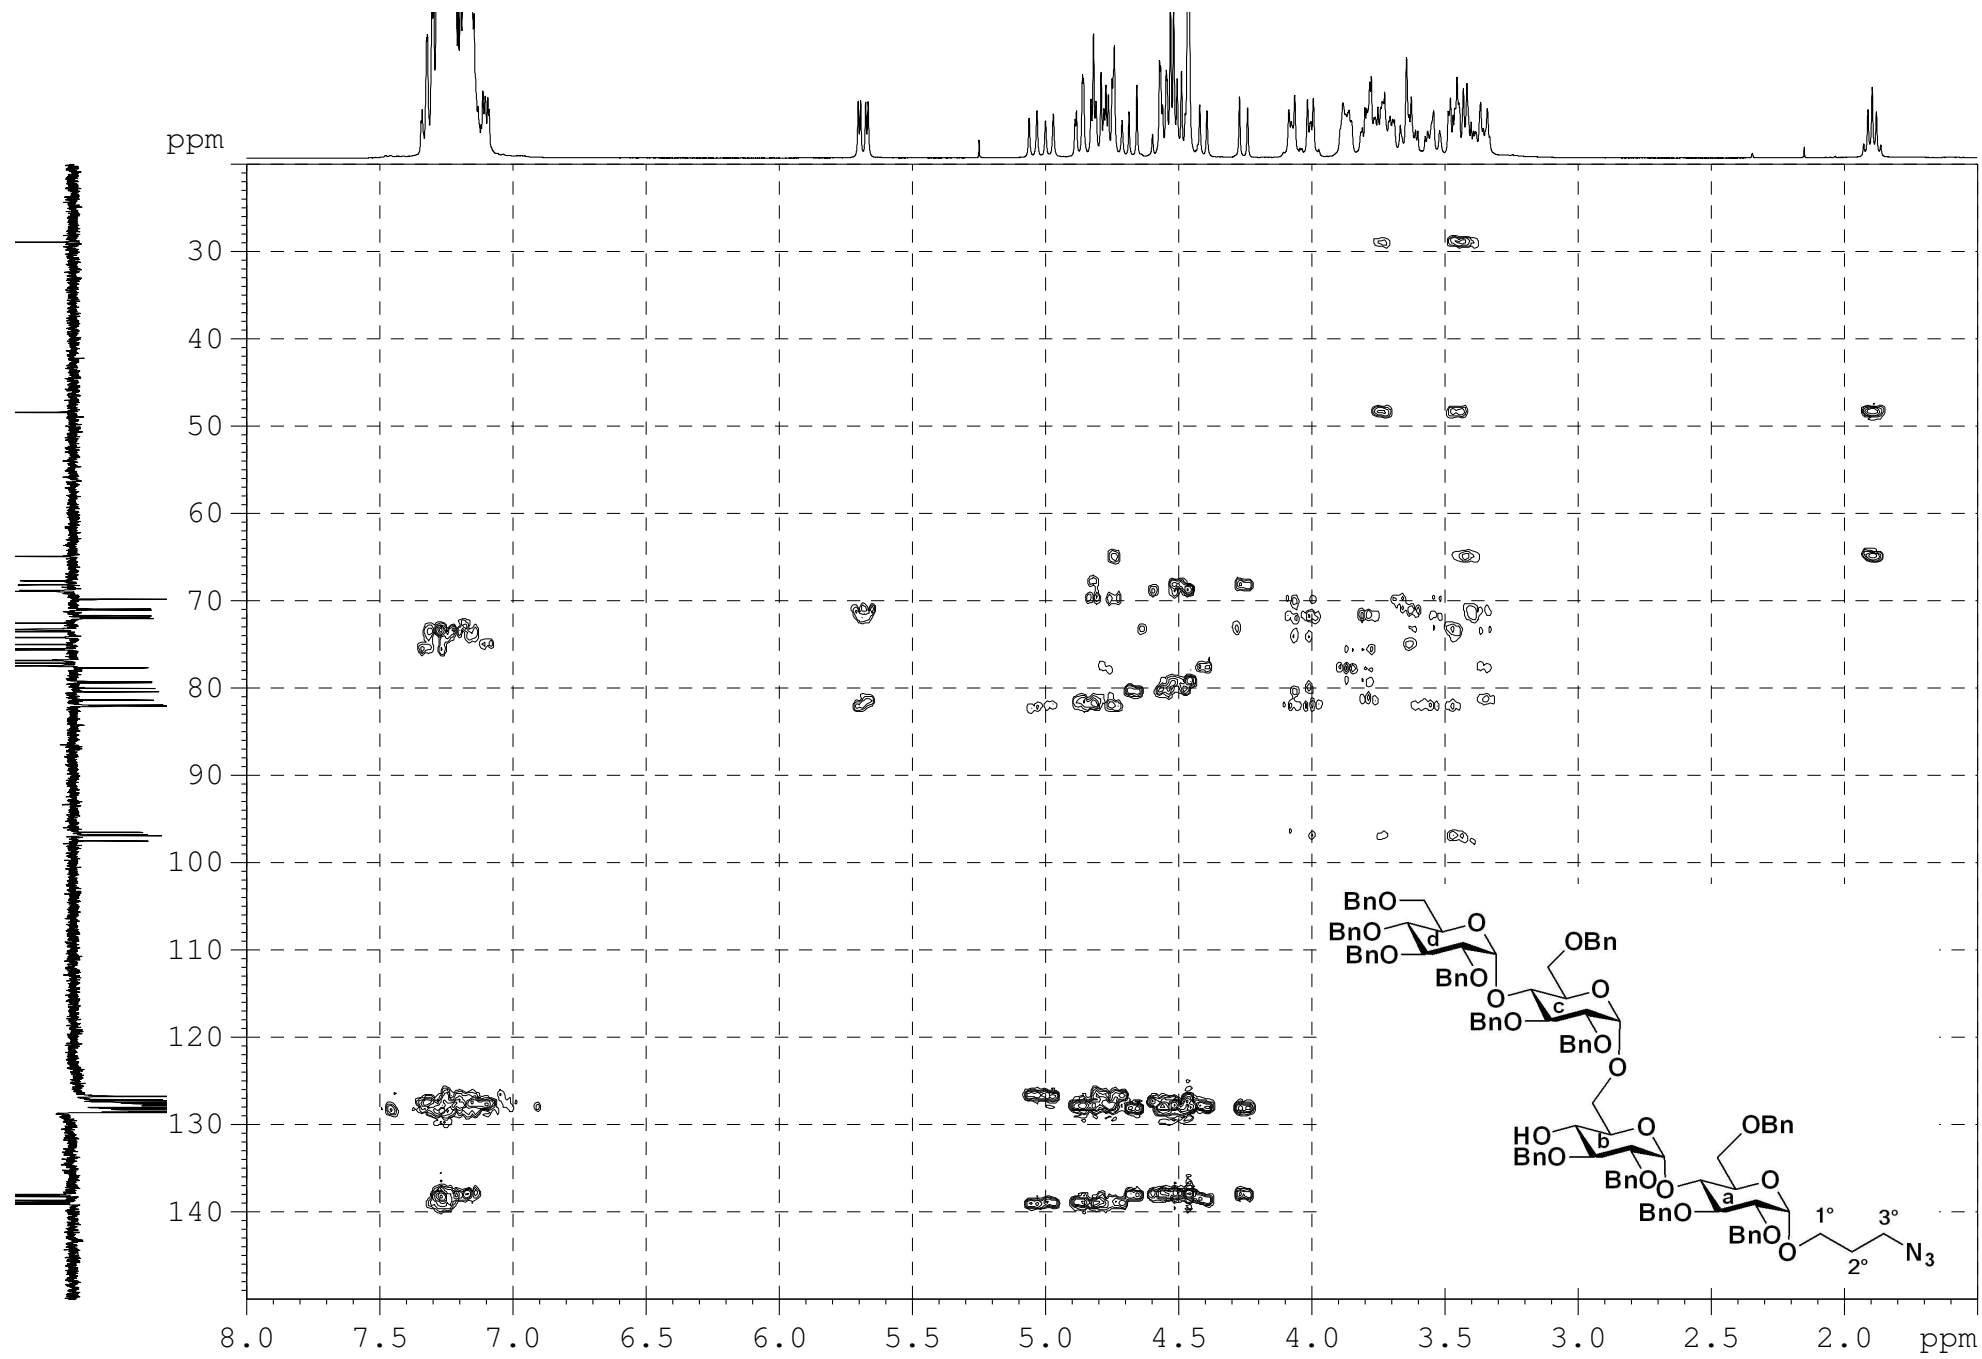

<sup>1</sup>H-NMR, <sup>13</sup>C-APT, <sup>1</sup>H-<sup>1</sup>H COSY, HSQC, HMBC, GATED of **36**

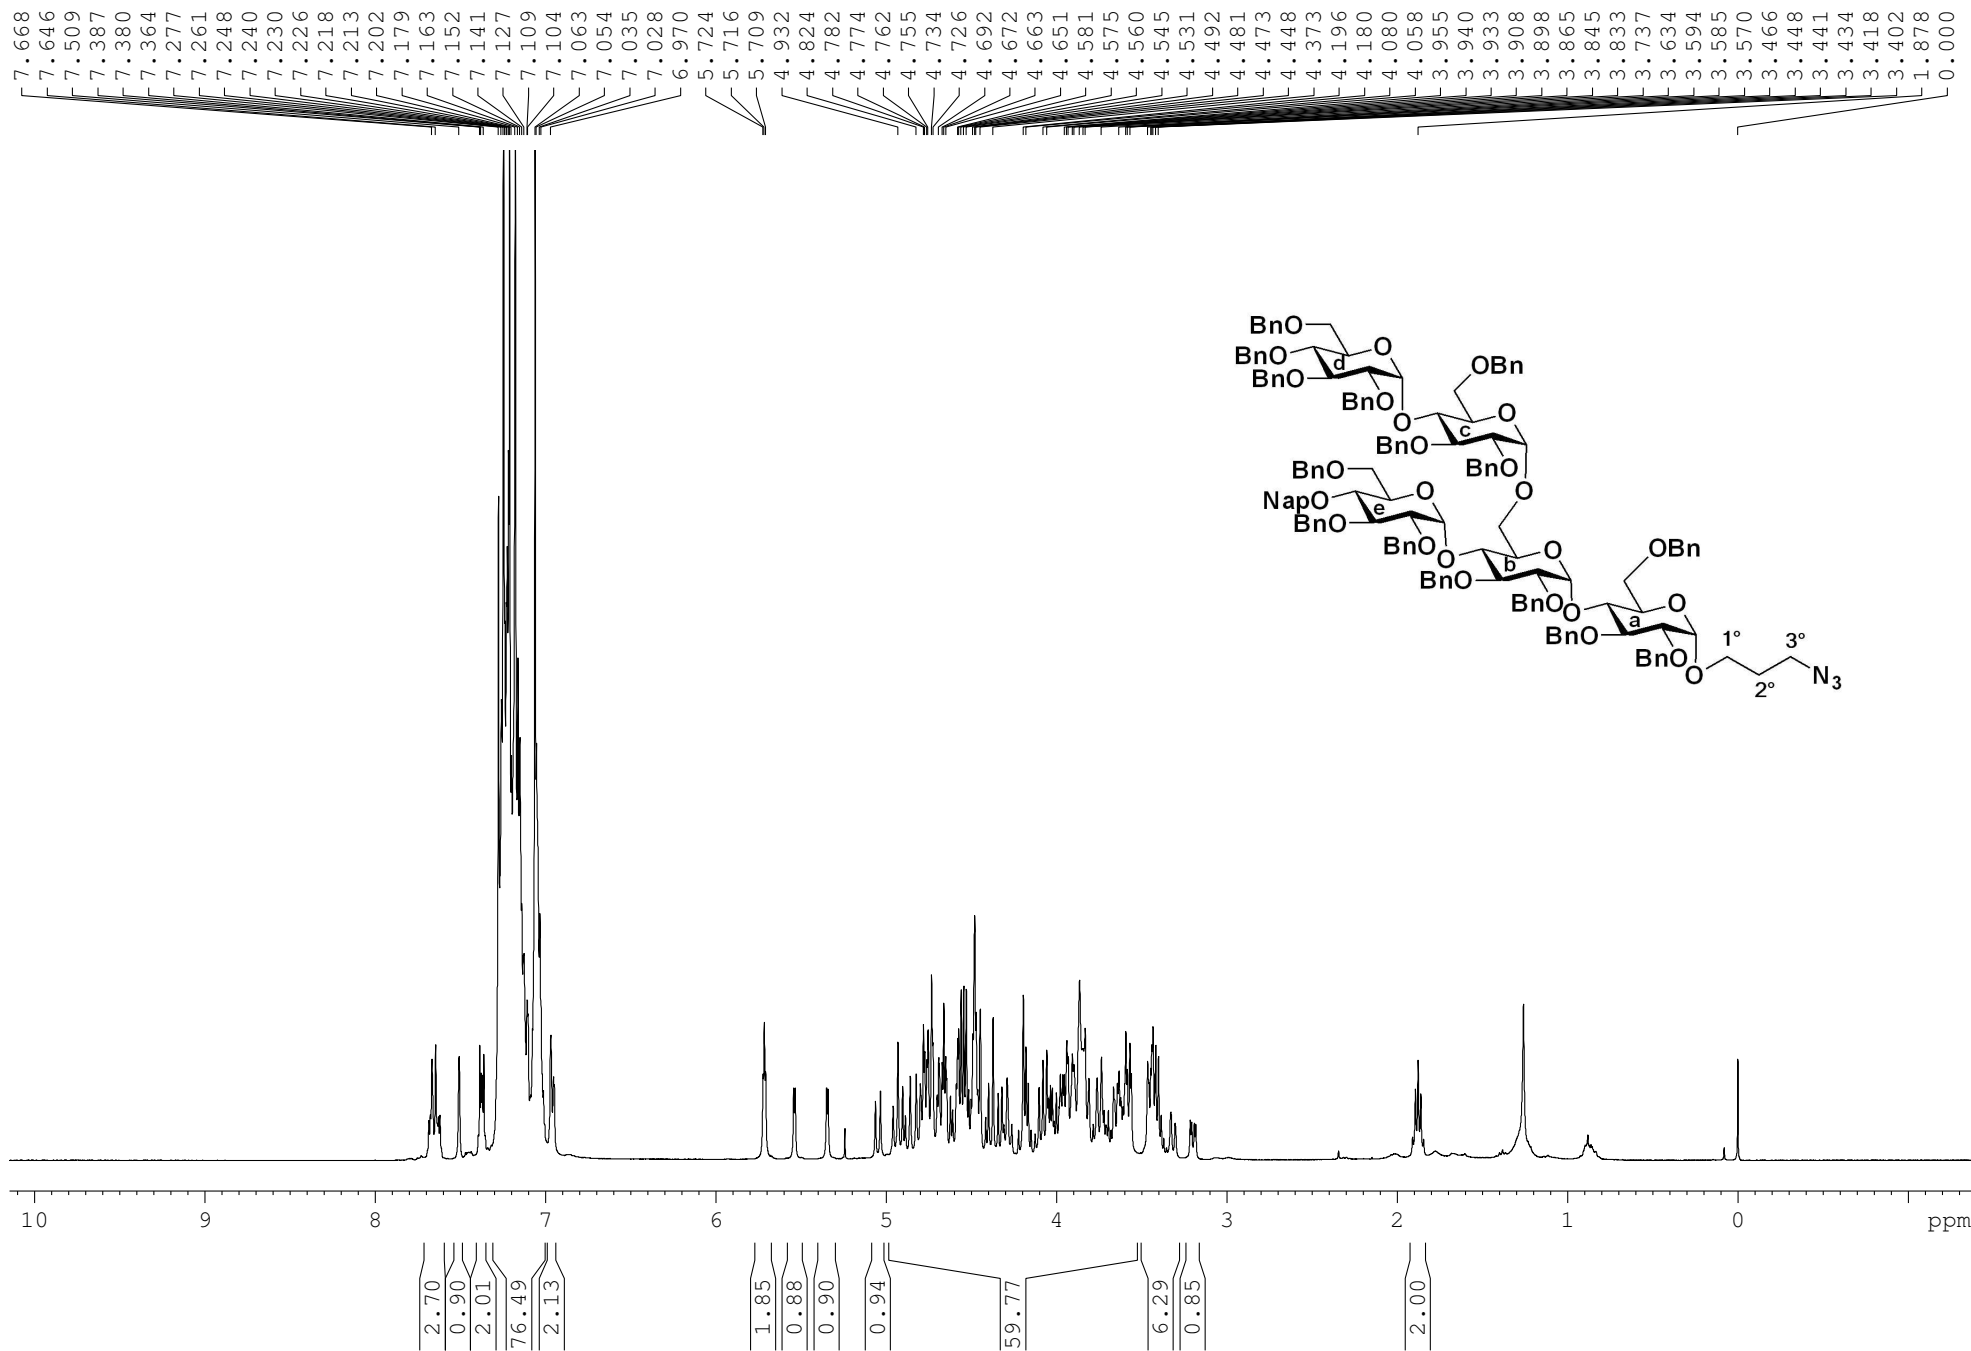

139.12  
138.98  
138.89  
138.87  
138.72  
138.51  
138.25  
138.18  
138.16  
138.11  
138.07  
138.04  
137.72  
135.91  
133.29  
133.01  
128.58  
128.06  
127.72  
127.68  
127.56  
127.31  
127.24  
127.04  
126.94  
126.79  
126.75  
126.61  
126.24  
126.05  
125.88  
97.14  
96.95  
96.63  
96.51  
95.80  
82.13  
81.98  
81.78  
81.08  
80.34  
80.20  
79.46  
79.25  
77.69  
77.57  
77.48  
77.16  
76.84  
75.49  
75.24  
75.01  
74.43  
74.24  
74.12  
73.68  
73.49  
73.35  
73.24  
73.11  
72.89  
72.38  
72.24  
72.11  
71.76  
71.60  
70.99  
69.90  
69.80  
68.98  
68.80  
68.20  
64.91  
64.30  
48.38  
29.80  
28.91

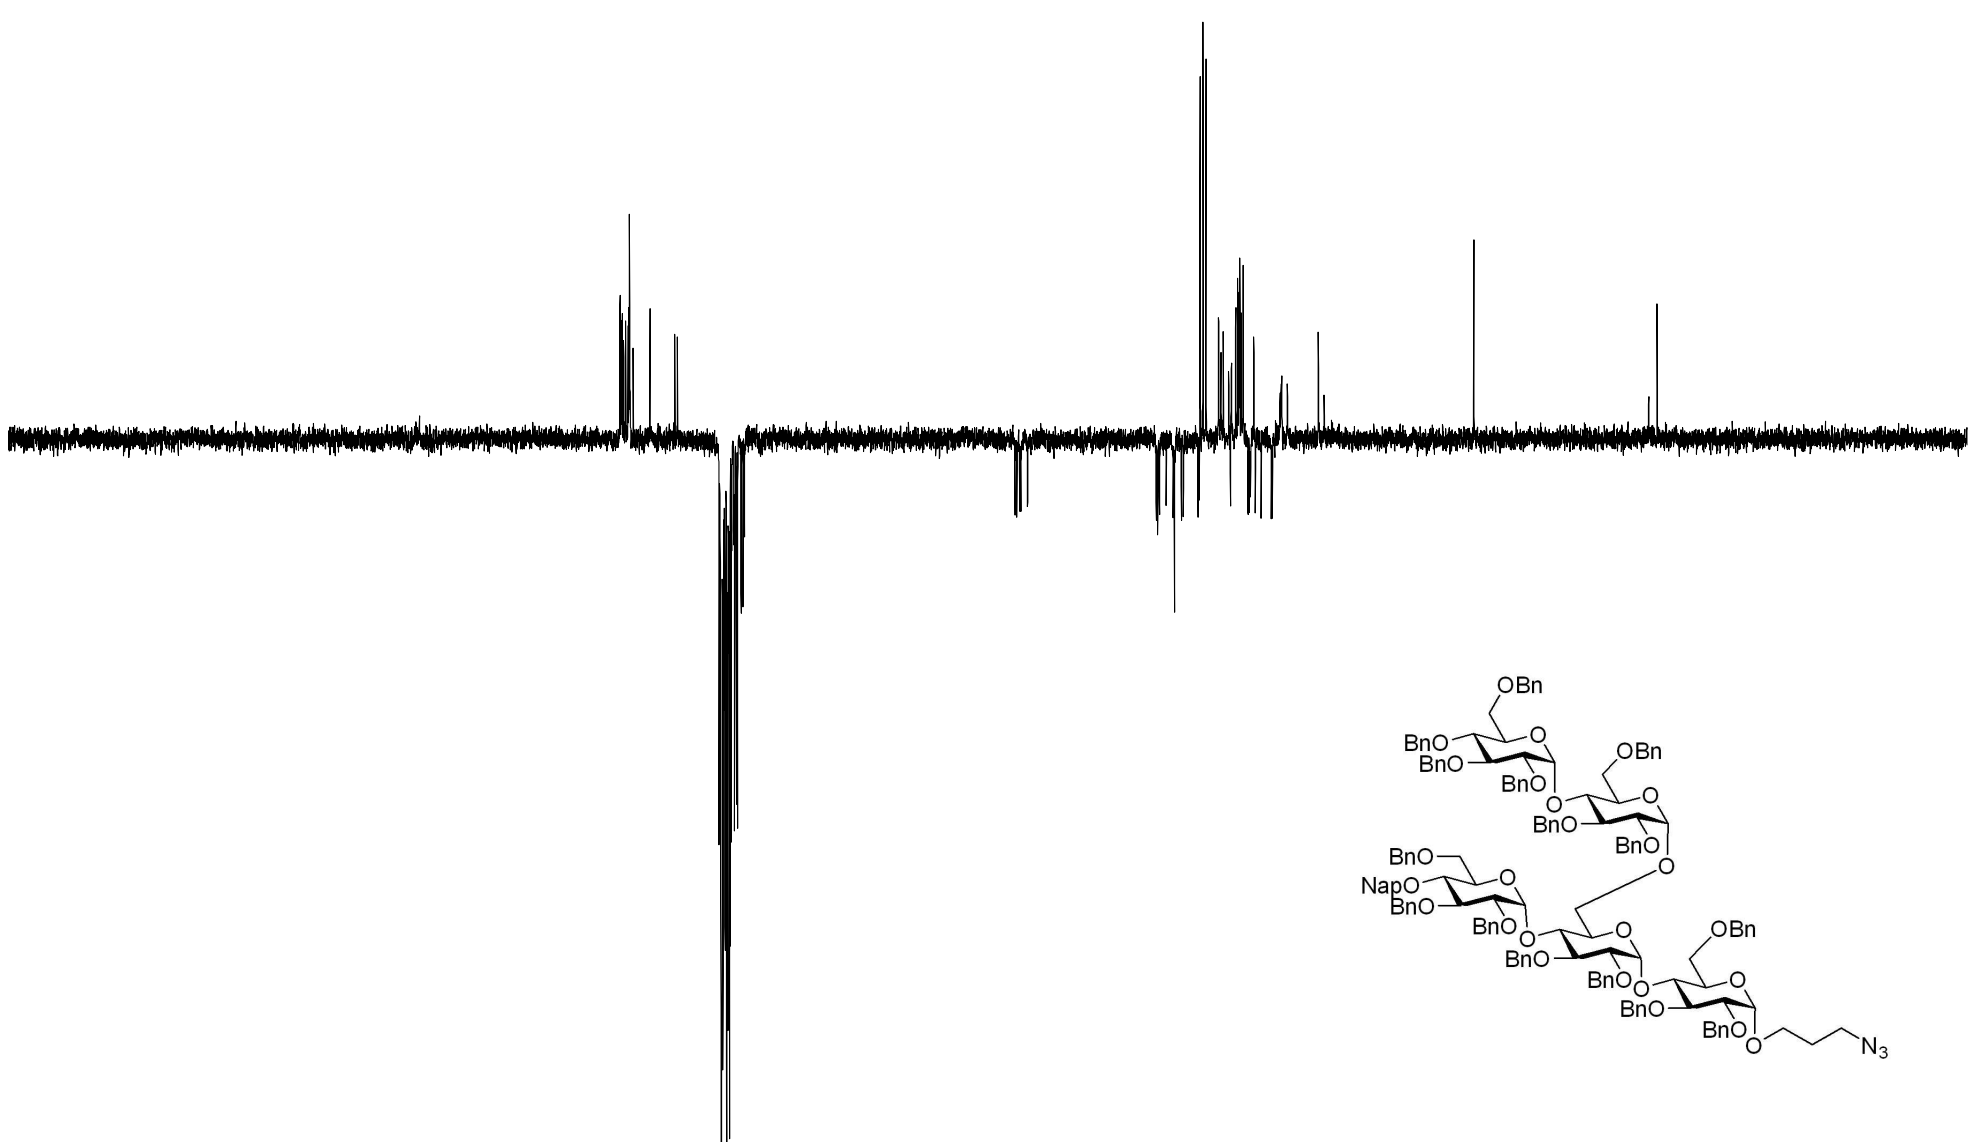

200 190 180 170 160 150 140 130 120 110 100 90 80 70 60 50 40 30 20 10 ppm

S177

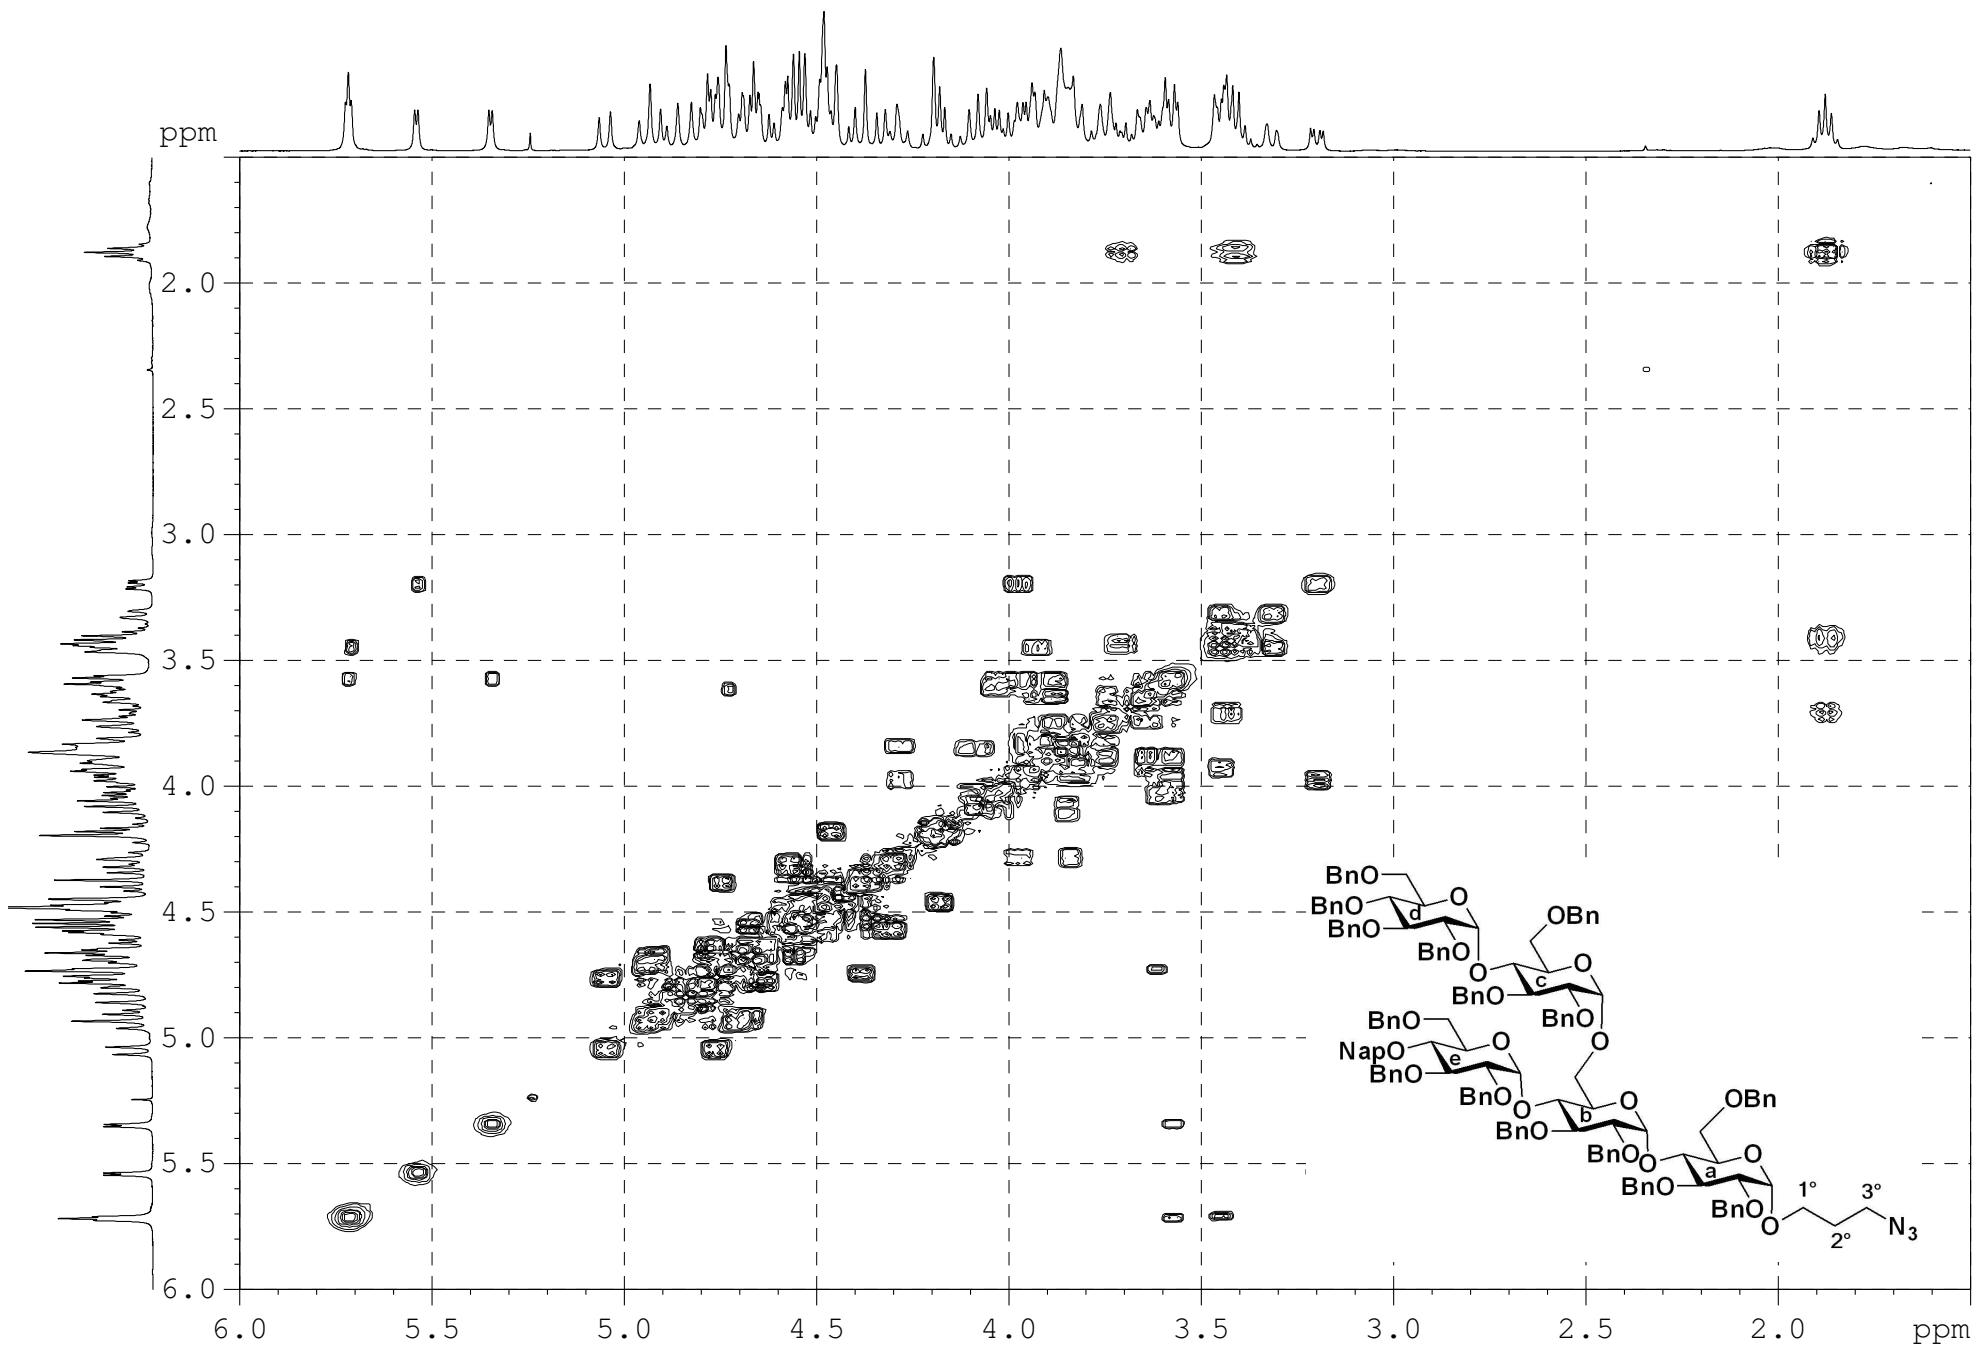

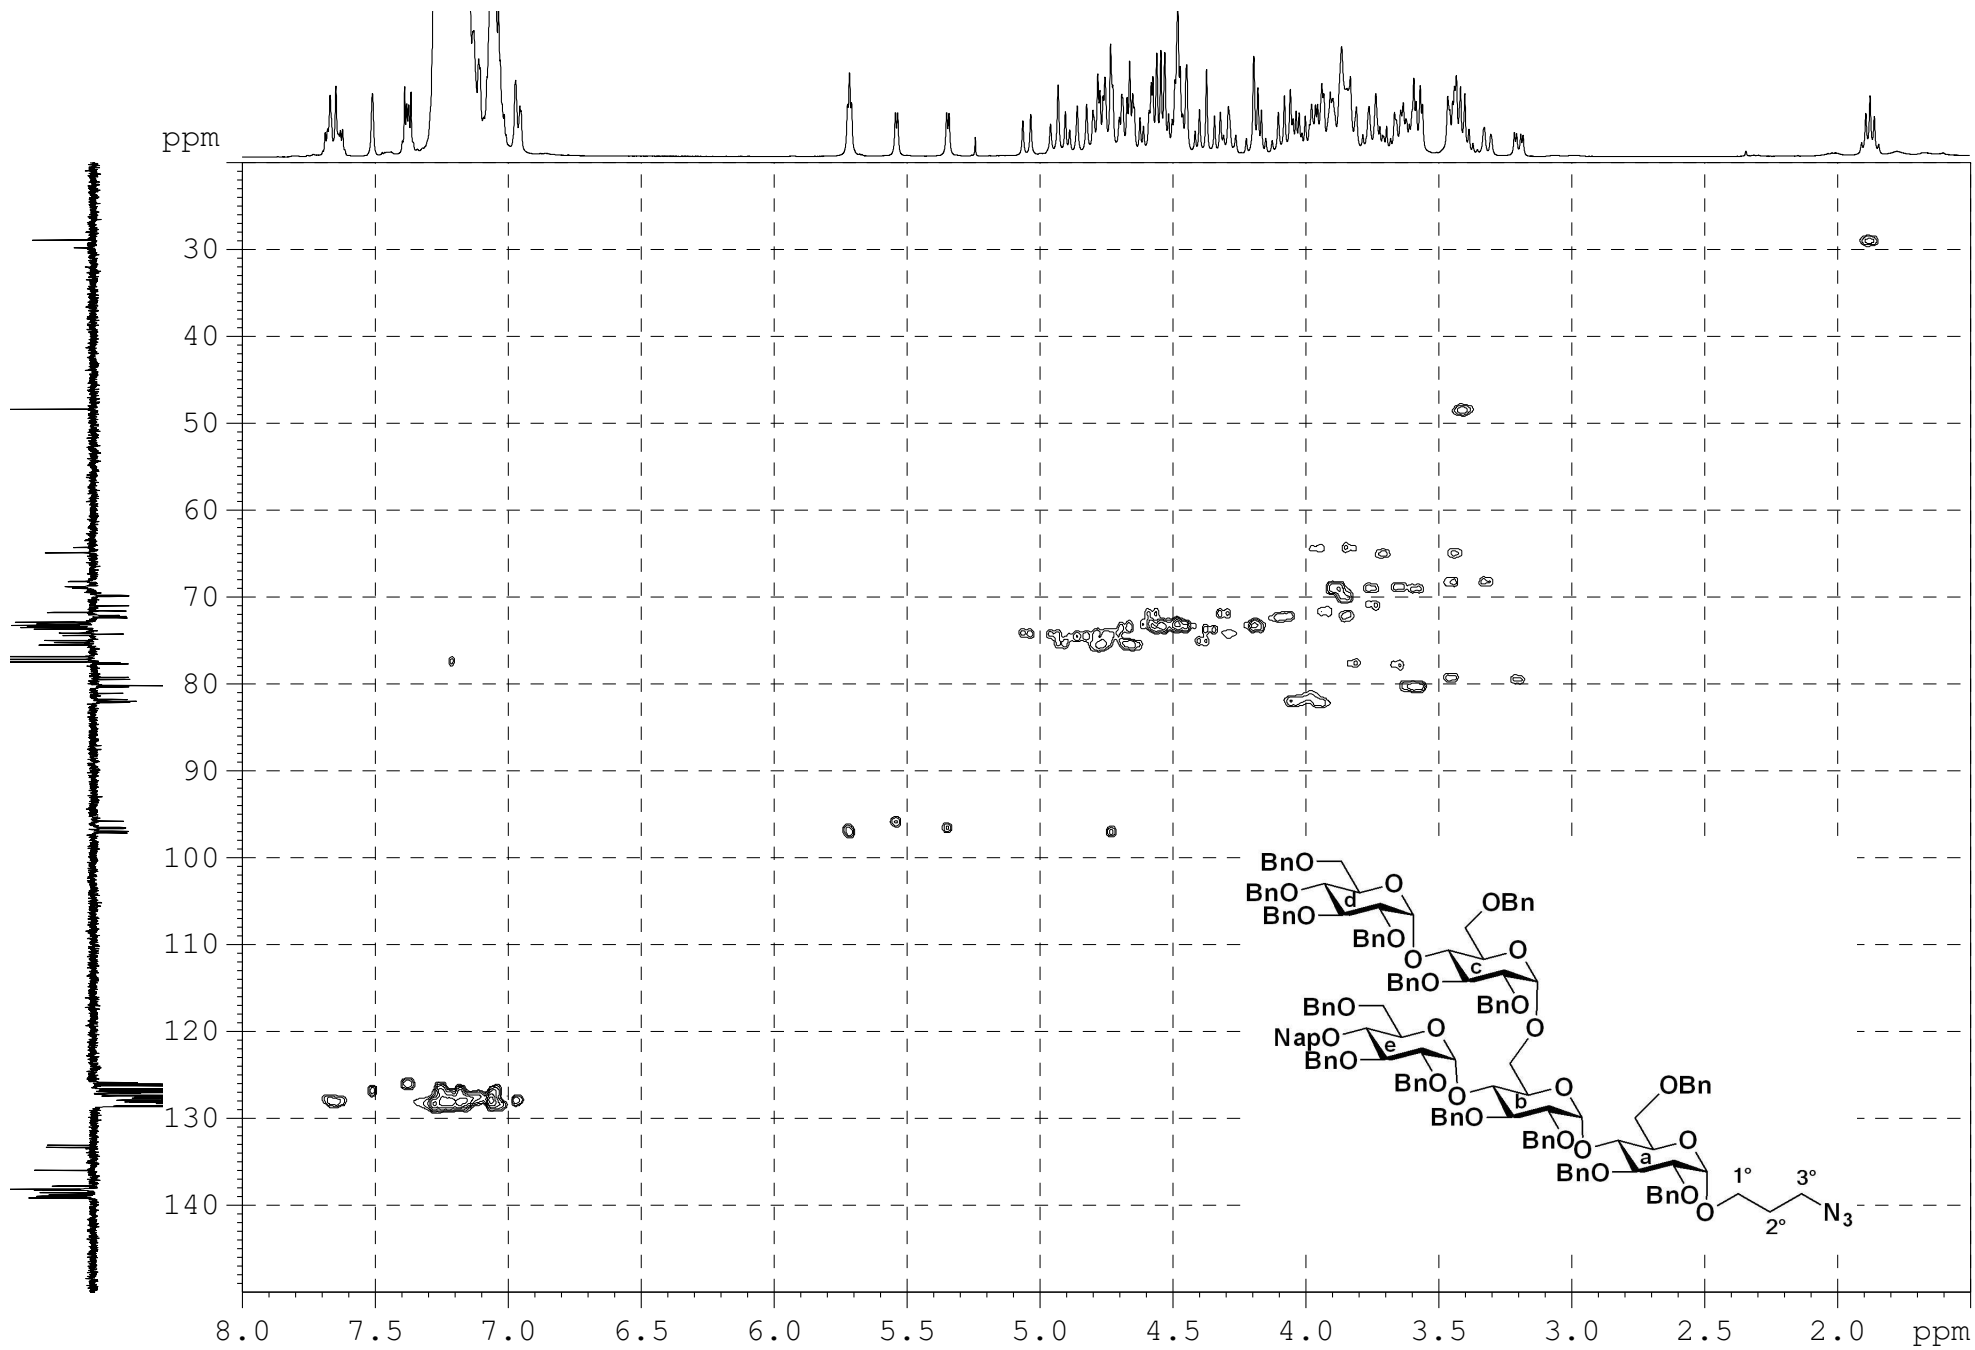

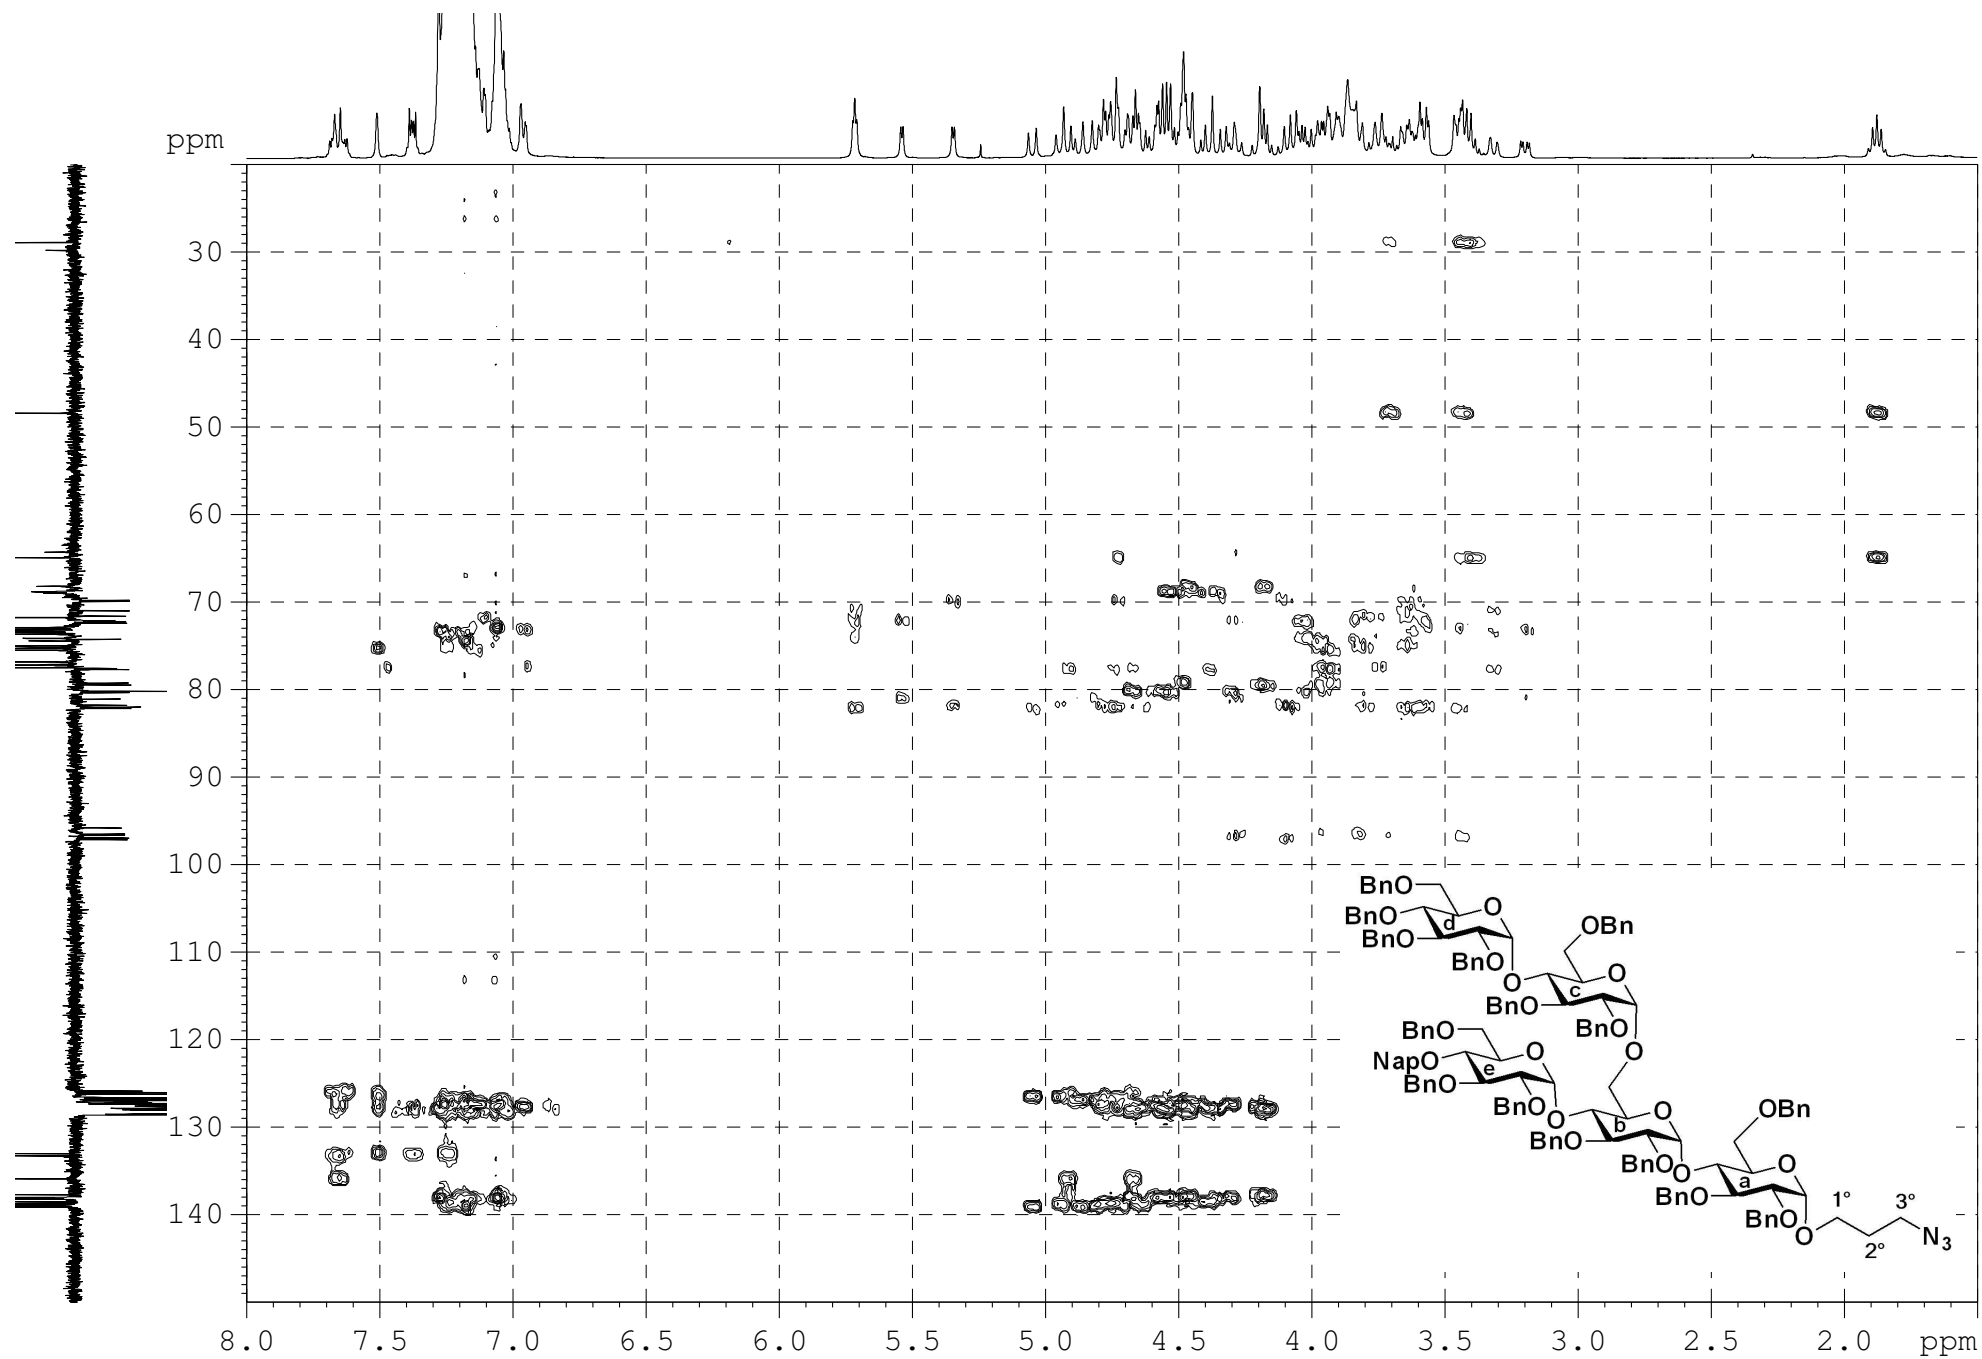



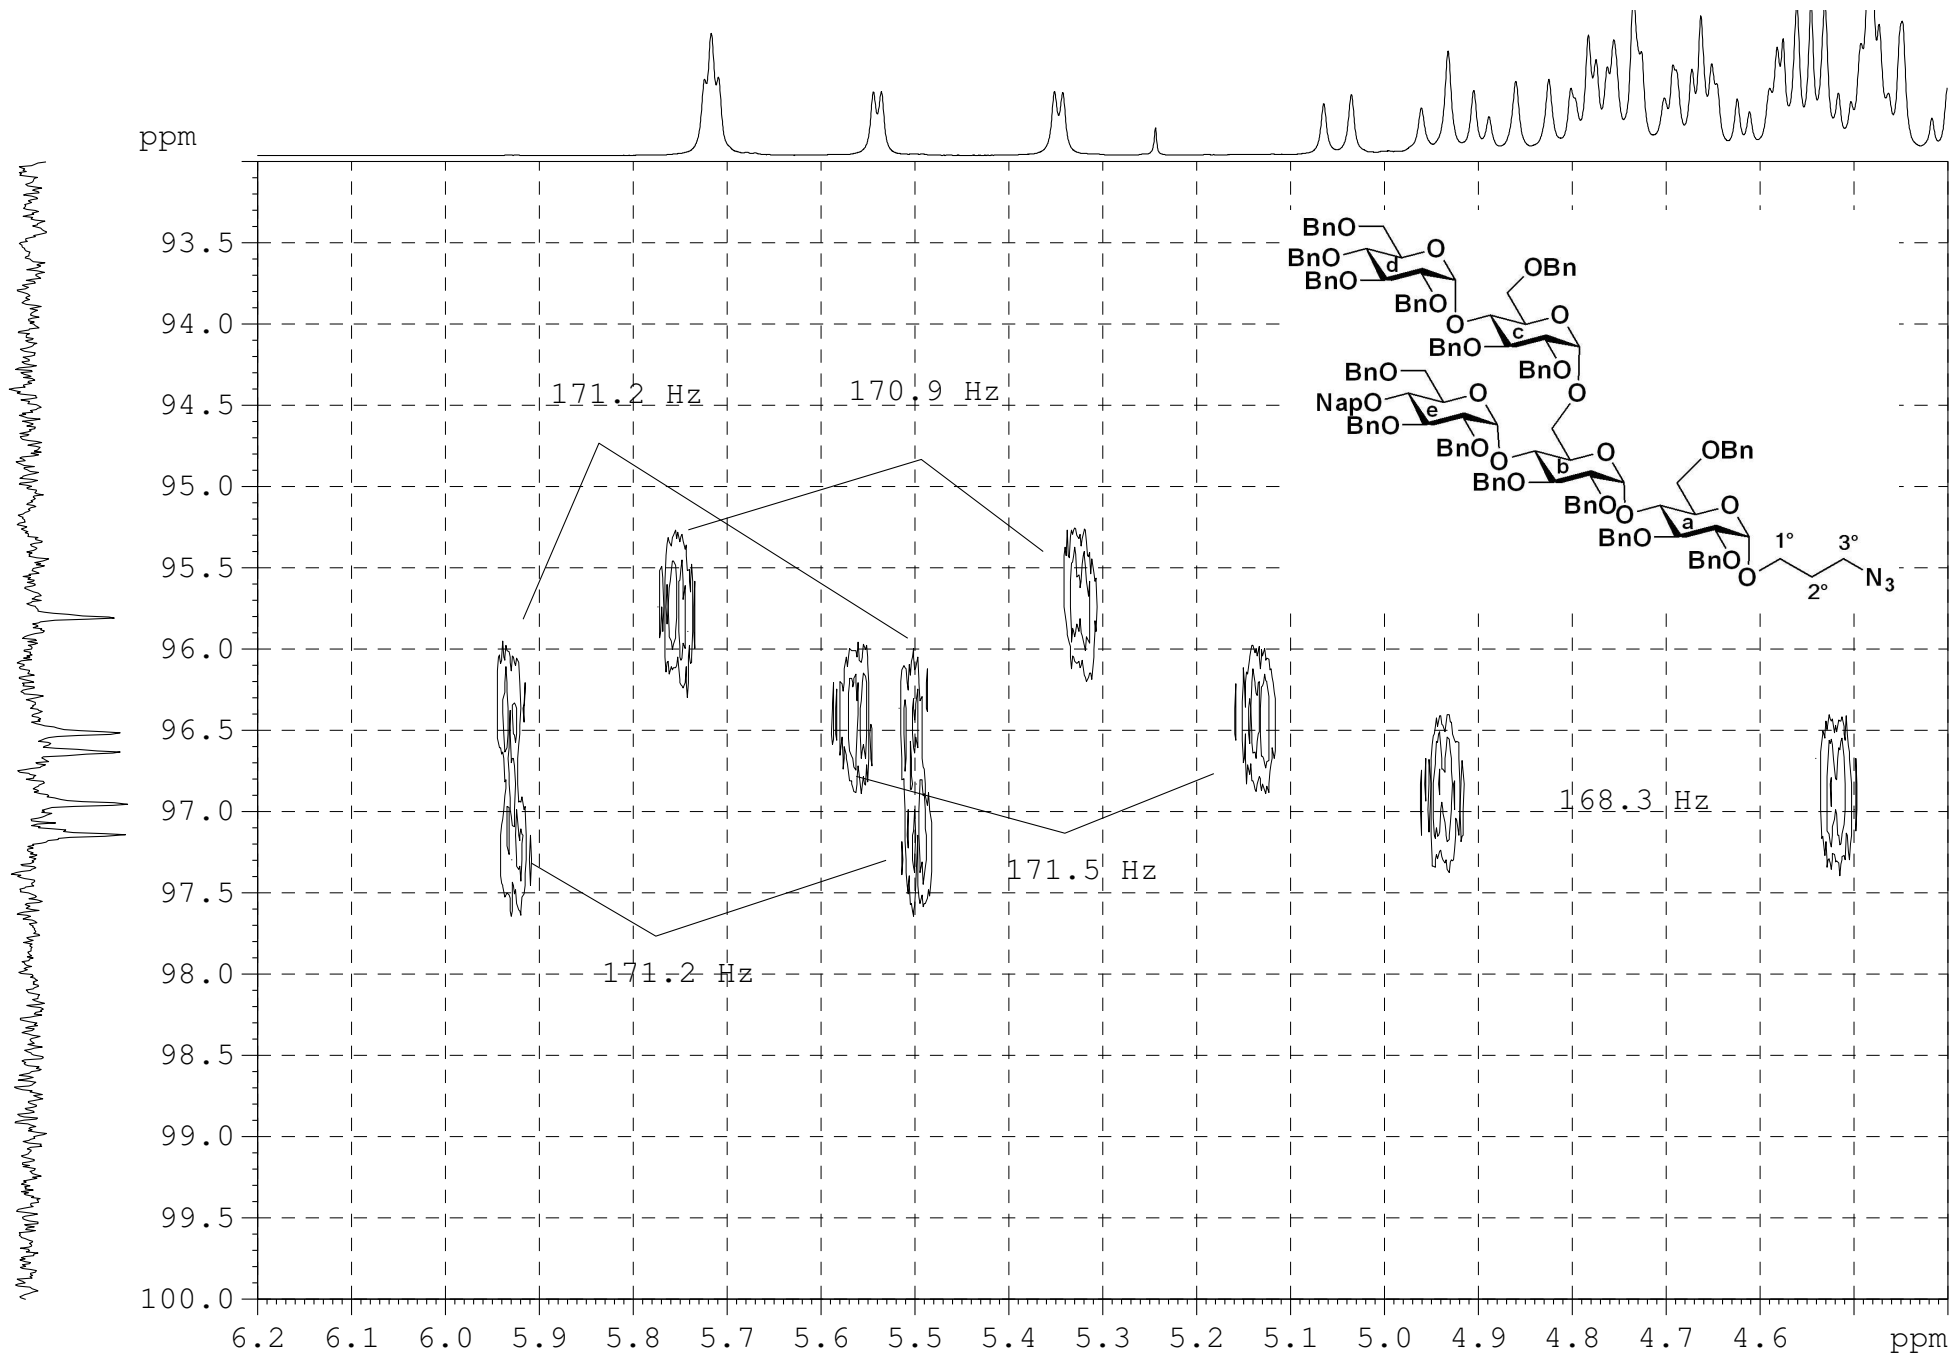

<sup>1</sup>H-NMR, <sup>13</sup>C-APT, <sup>1</sup>H-<sup>1</sup>H COSY, HSQC, HMBC of **37**

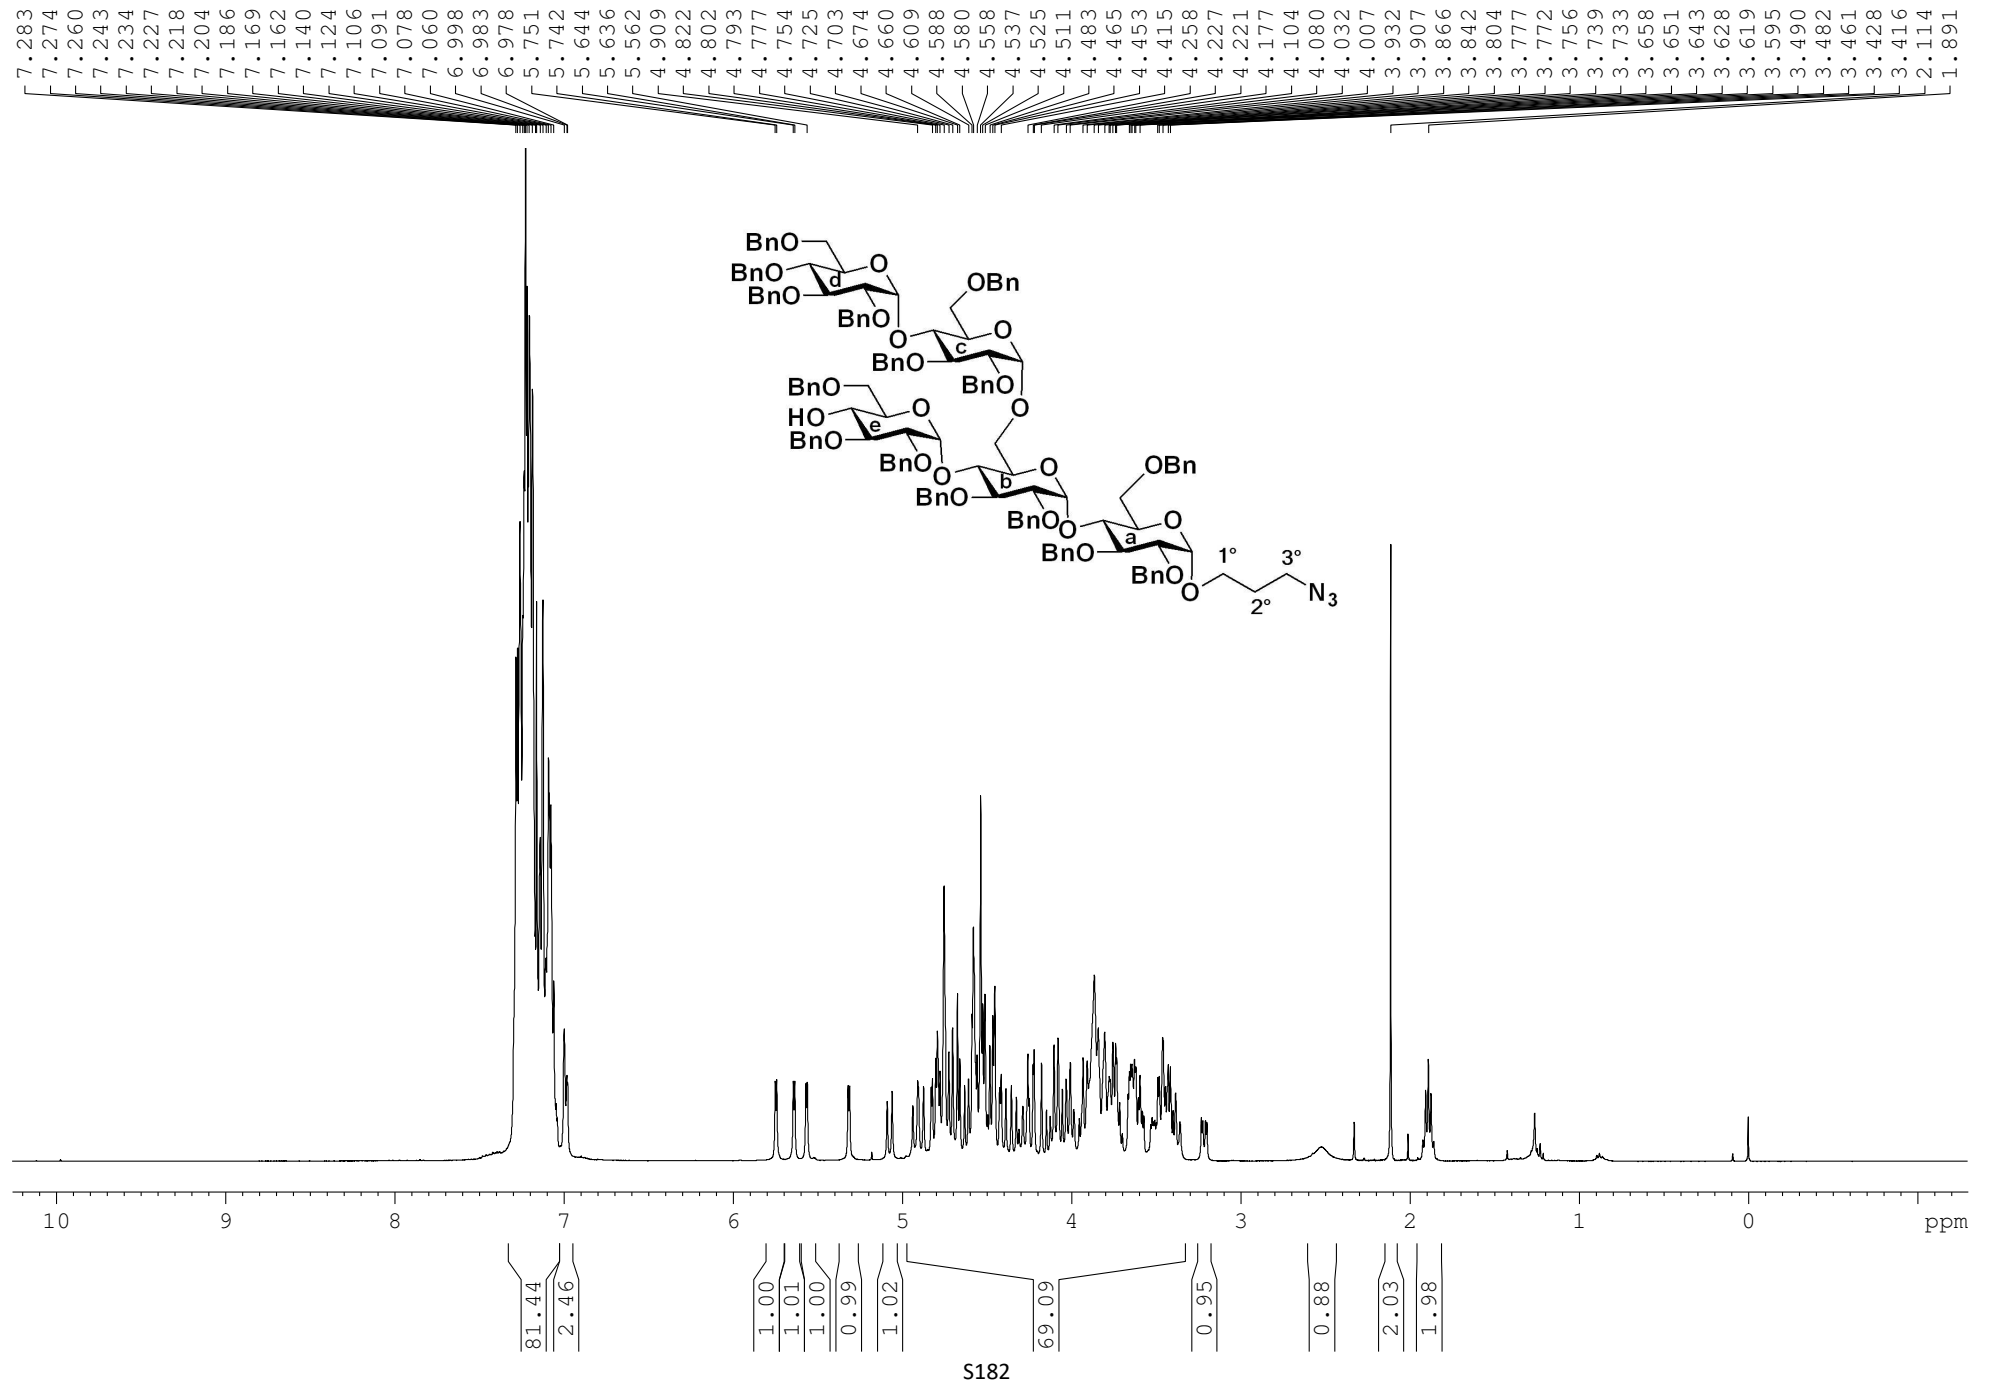

7.283  
7.274  
7.260  
7.243  
7.234  
7.227  
7.218  
7.204  
7.186  
7.169  
7.162  
7.140  
7.124  
7.106  
7.091  
7.078  
7.060  
6.998  
6.983  
6.978  
5.751  
5.742  
5.644  
5.636  
5.562  
4.909  
4.822  
4.802  
4.793  
4.777  
4.754  
4.725  
4.703  
4.674  
4.660  
4.609  
4.588  
4.580  
4.558  
4.537  
4.525  
4.511  
4.483  
4.465  
4.453  
4.415  
4.258  
4.227  
4.221  
4.177  
4.104  
4.080  
4.032  
4.007  
3.932  
3.907  
3.866  
3.842  
3.804  
3.777  
3.772  
3.756  
3.739  
3.733  
3.658  
3.651  
3.643  
3.628  
3.619  
3.595  
3.490  
3.482  
3.461  
3.428  
3.416  
2.114  
1.891

10 9 8 7 6 5 4 3 2 1 0 ppm



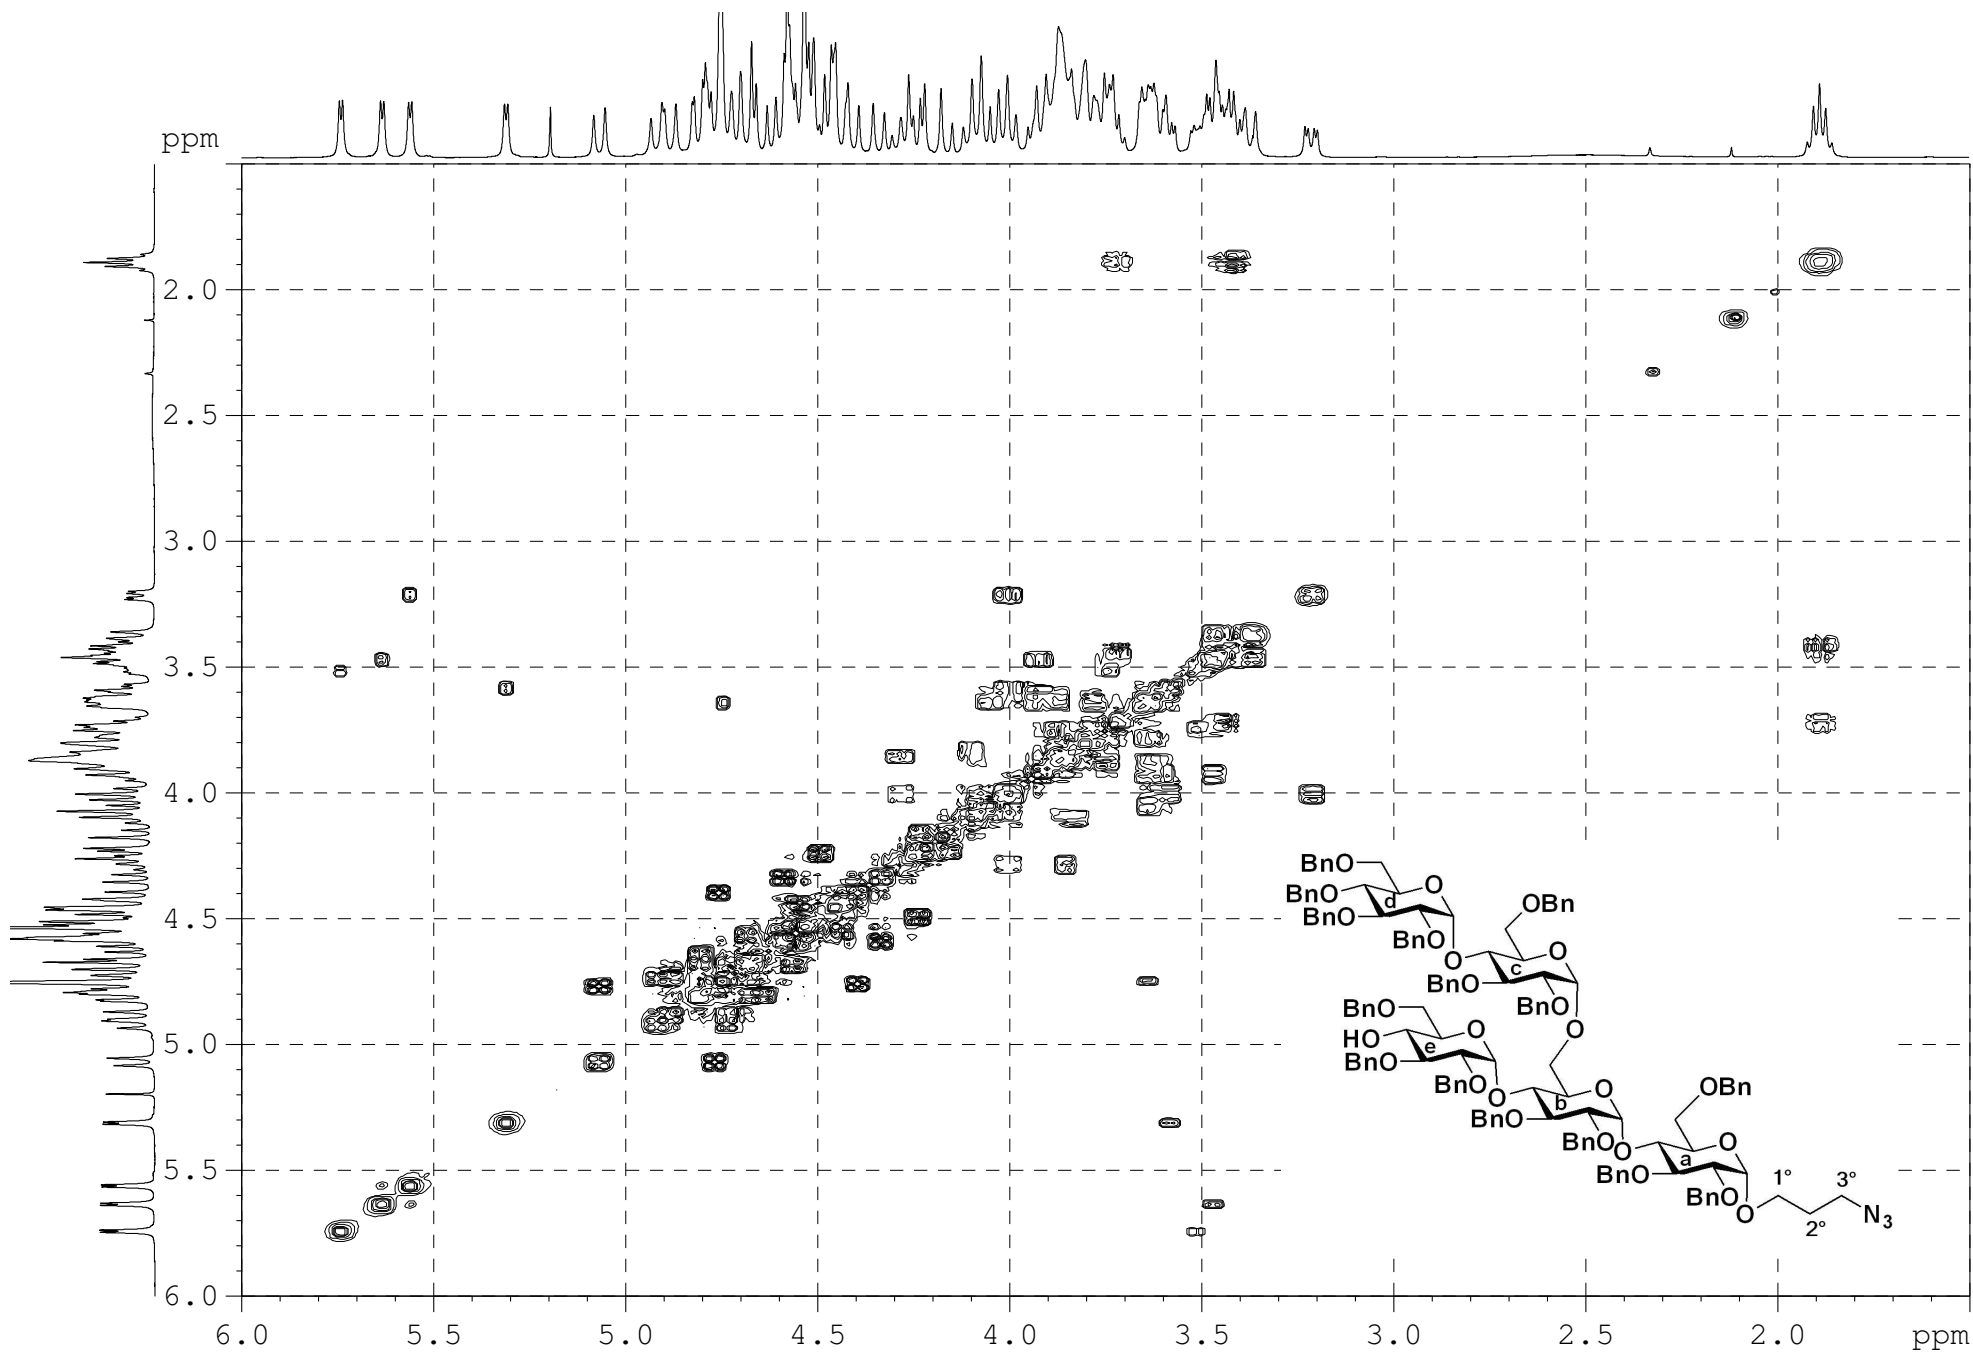

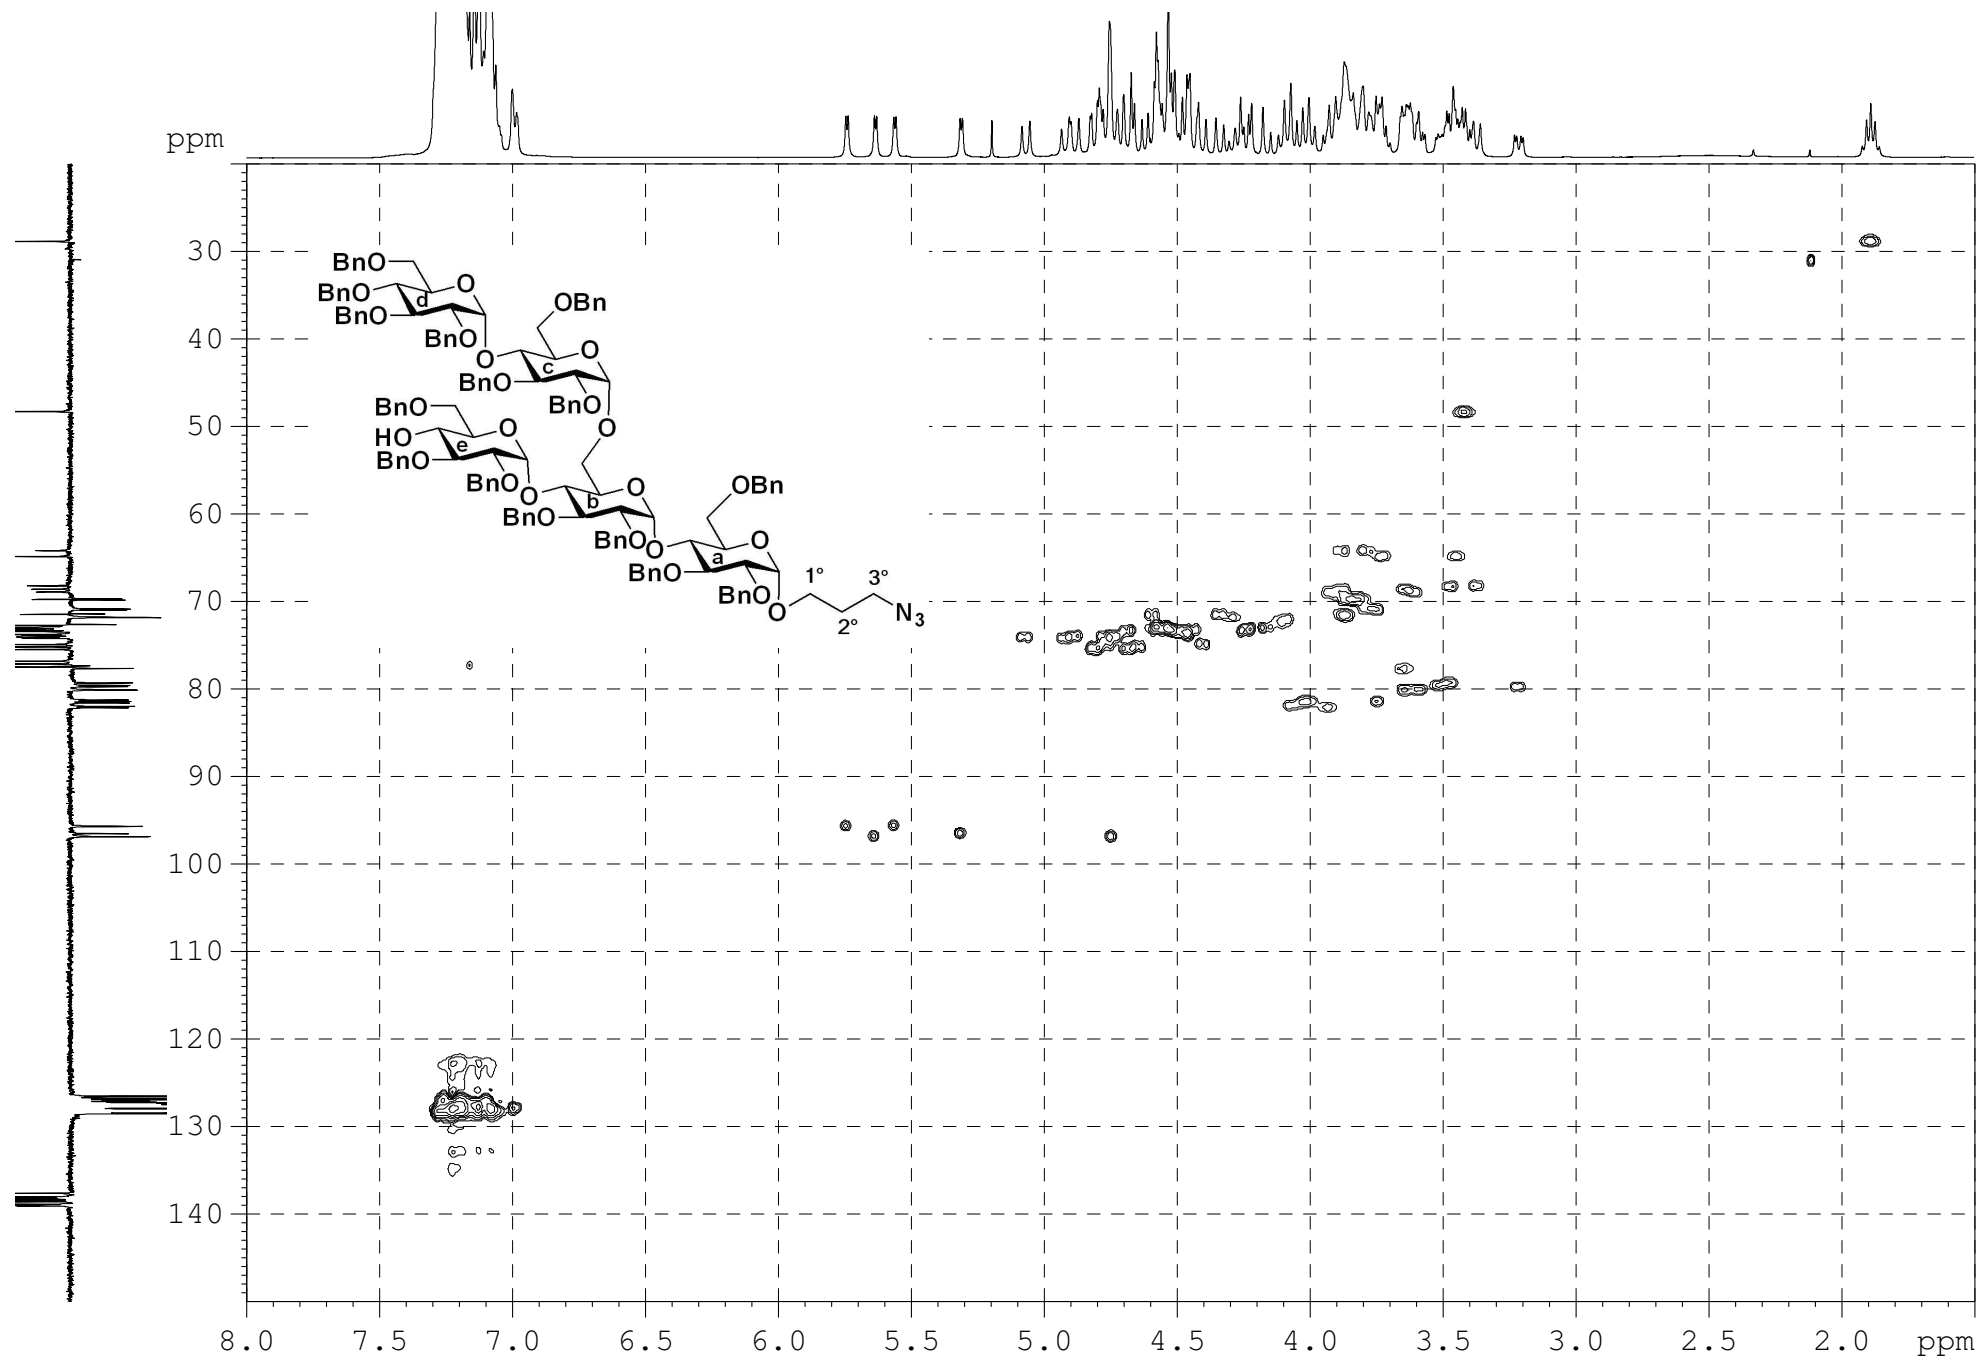

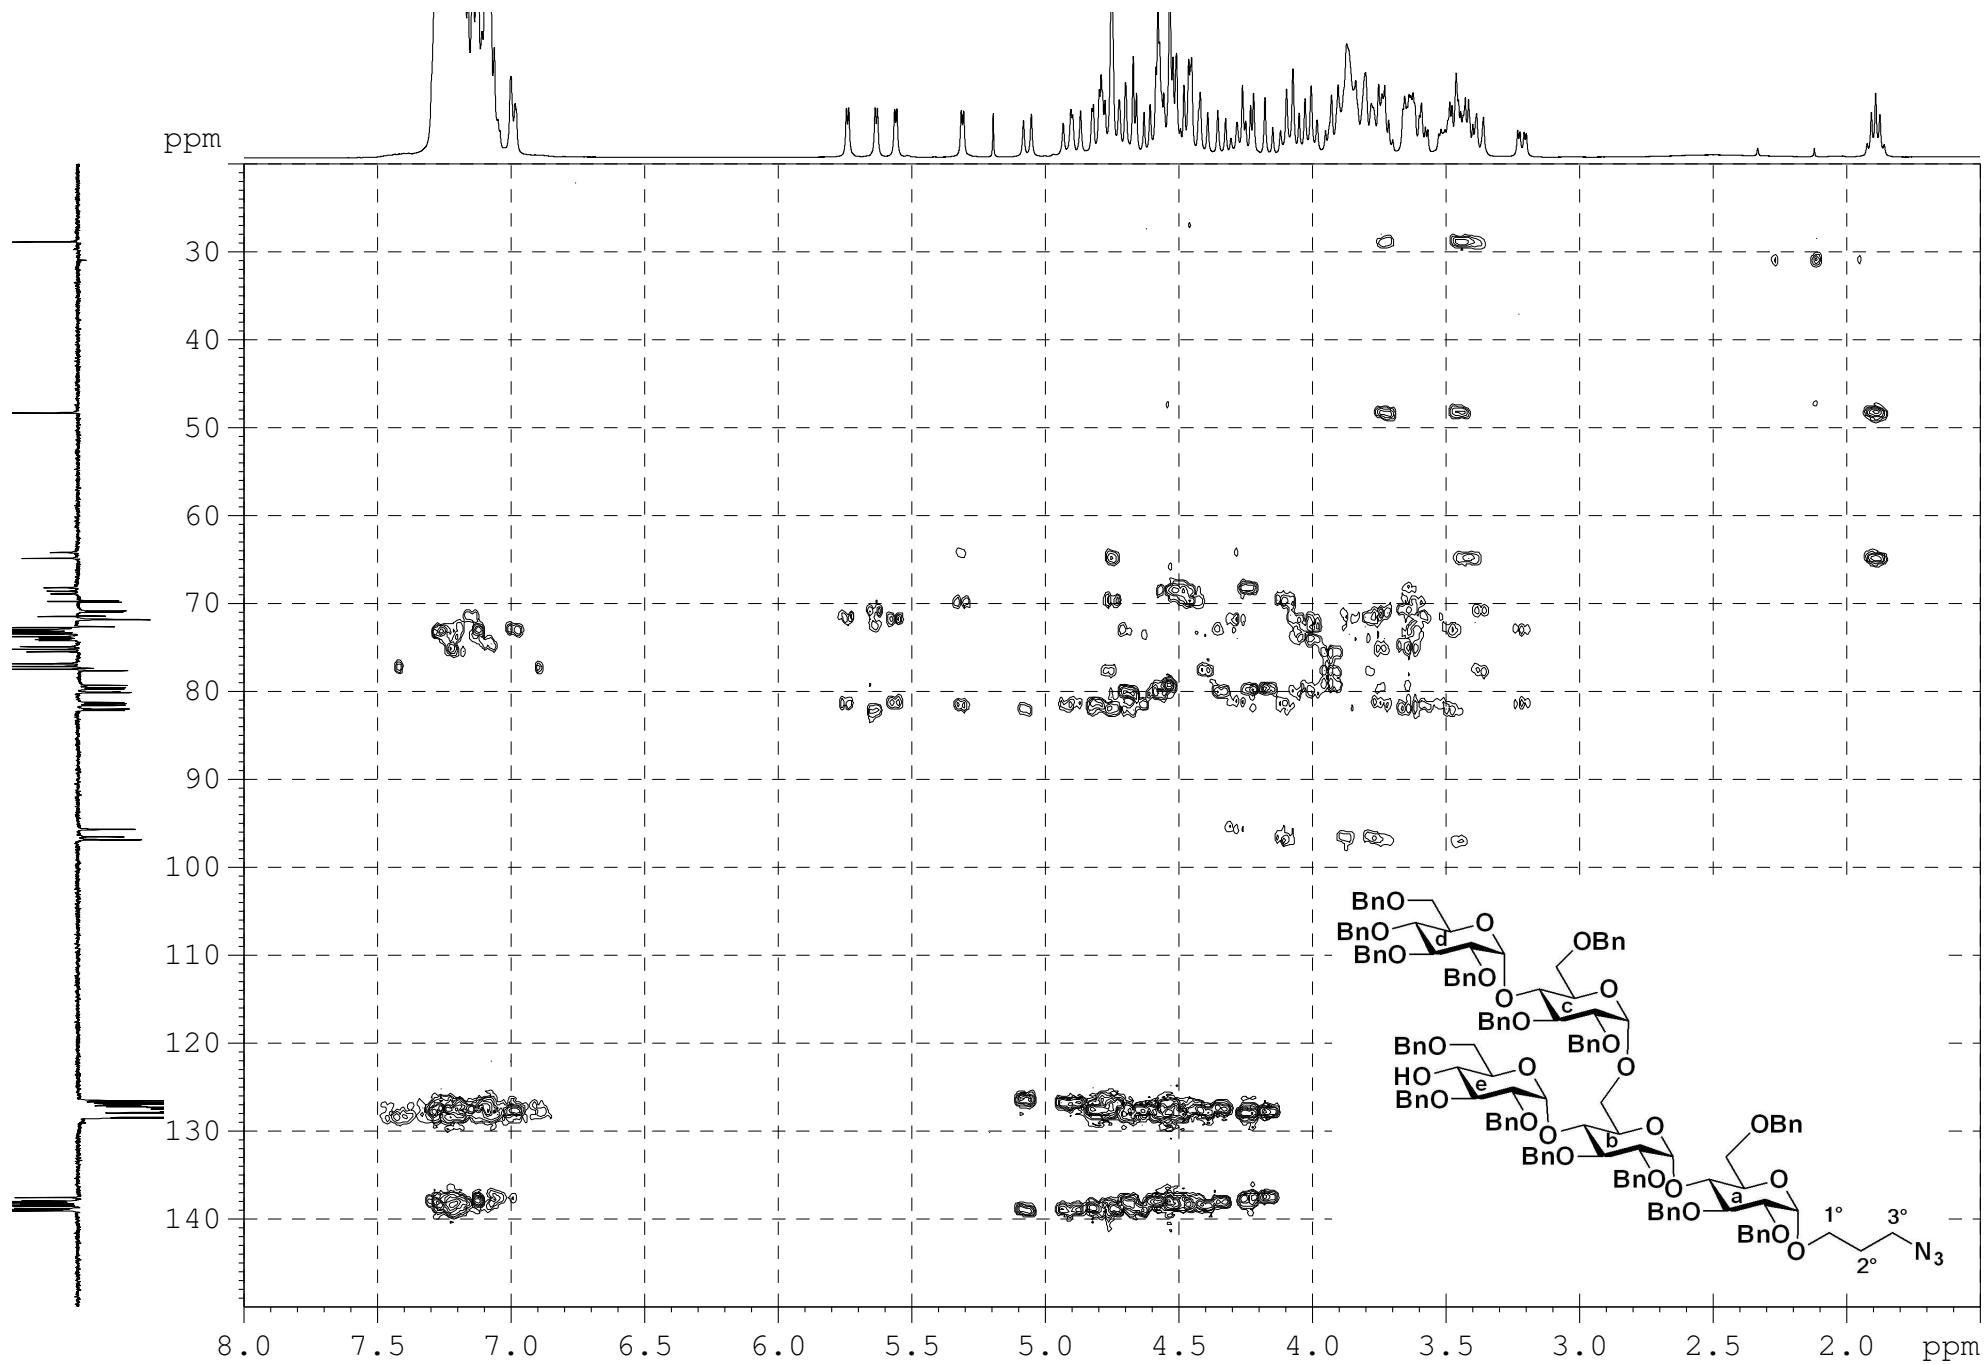

<sup>1</sup>H-NMR, <sup>13</sup>C-APT, <sup>1</sup>H-<sup>1</sup>H COSY, HSQC, HMBC, GATED, <sup>1</sup>H-<sup>1</sup>H cleantocsy **38**

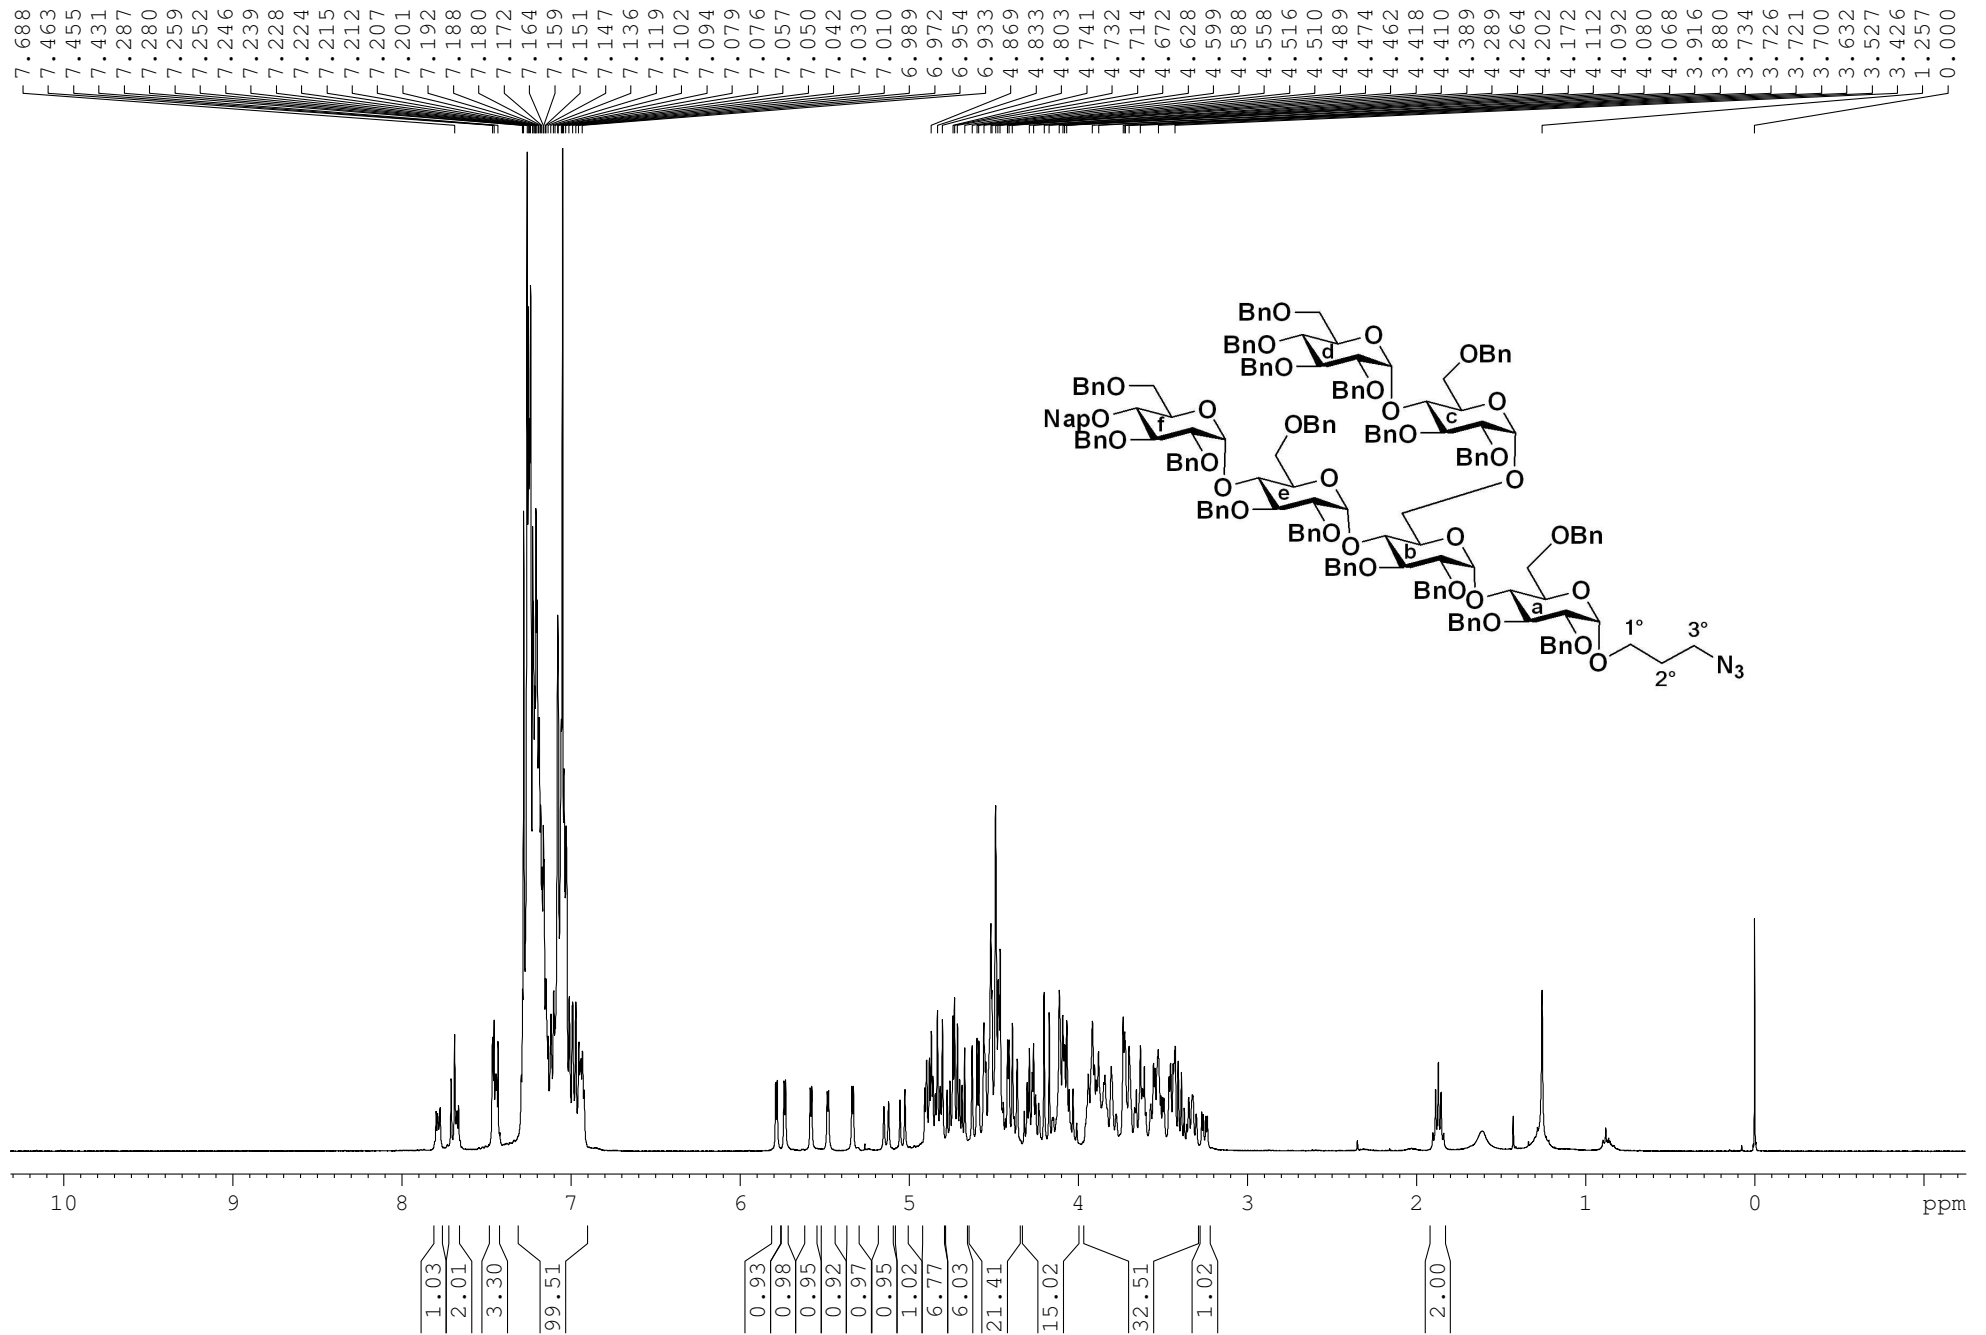





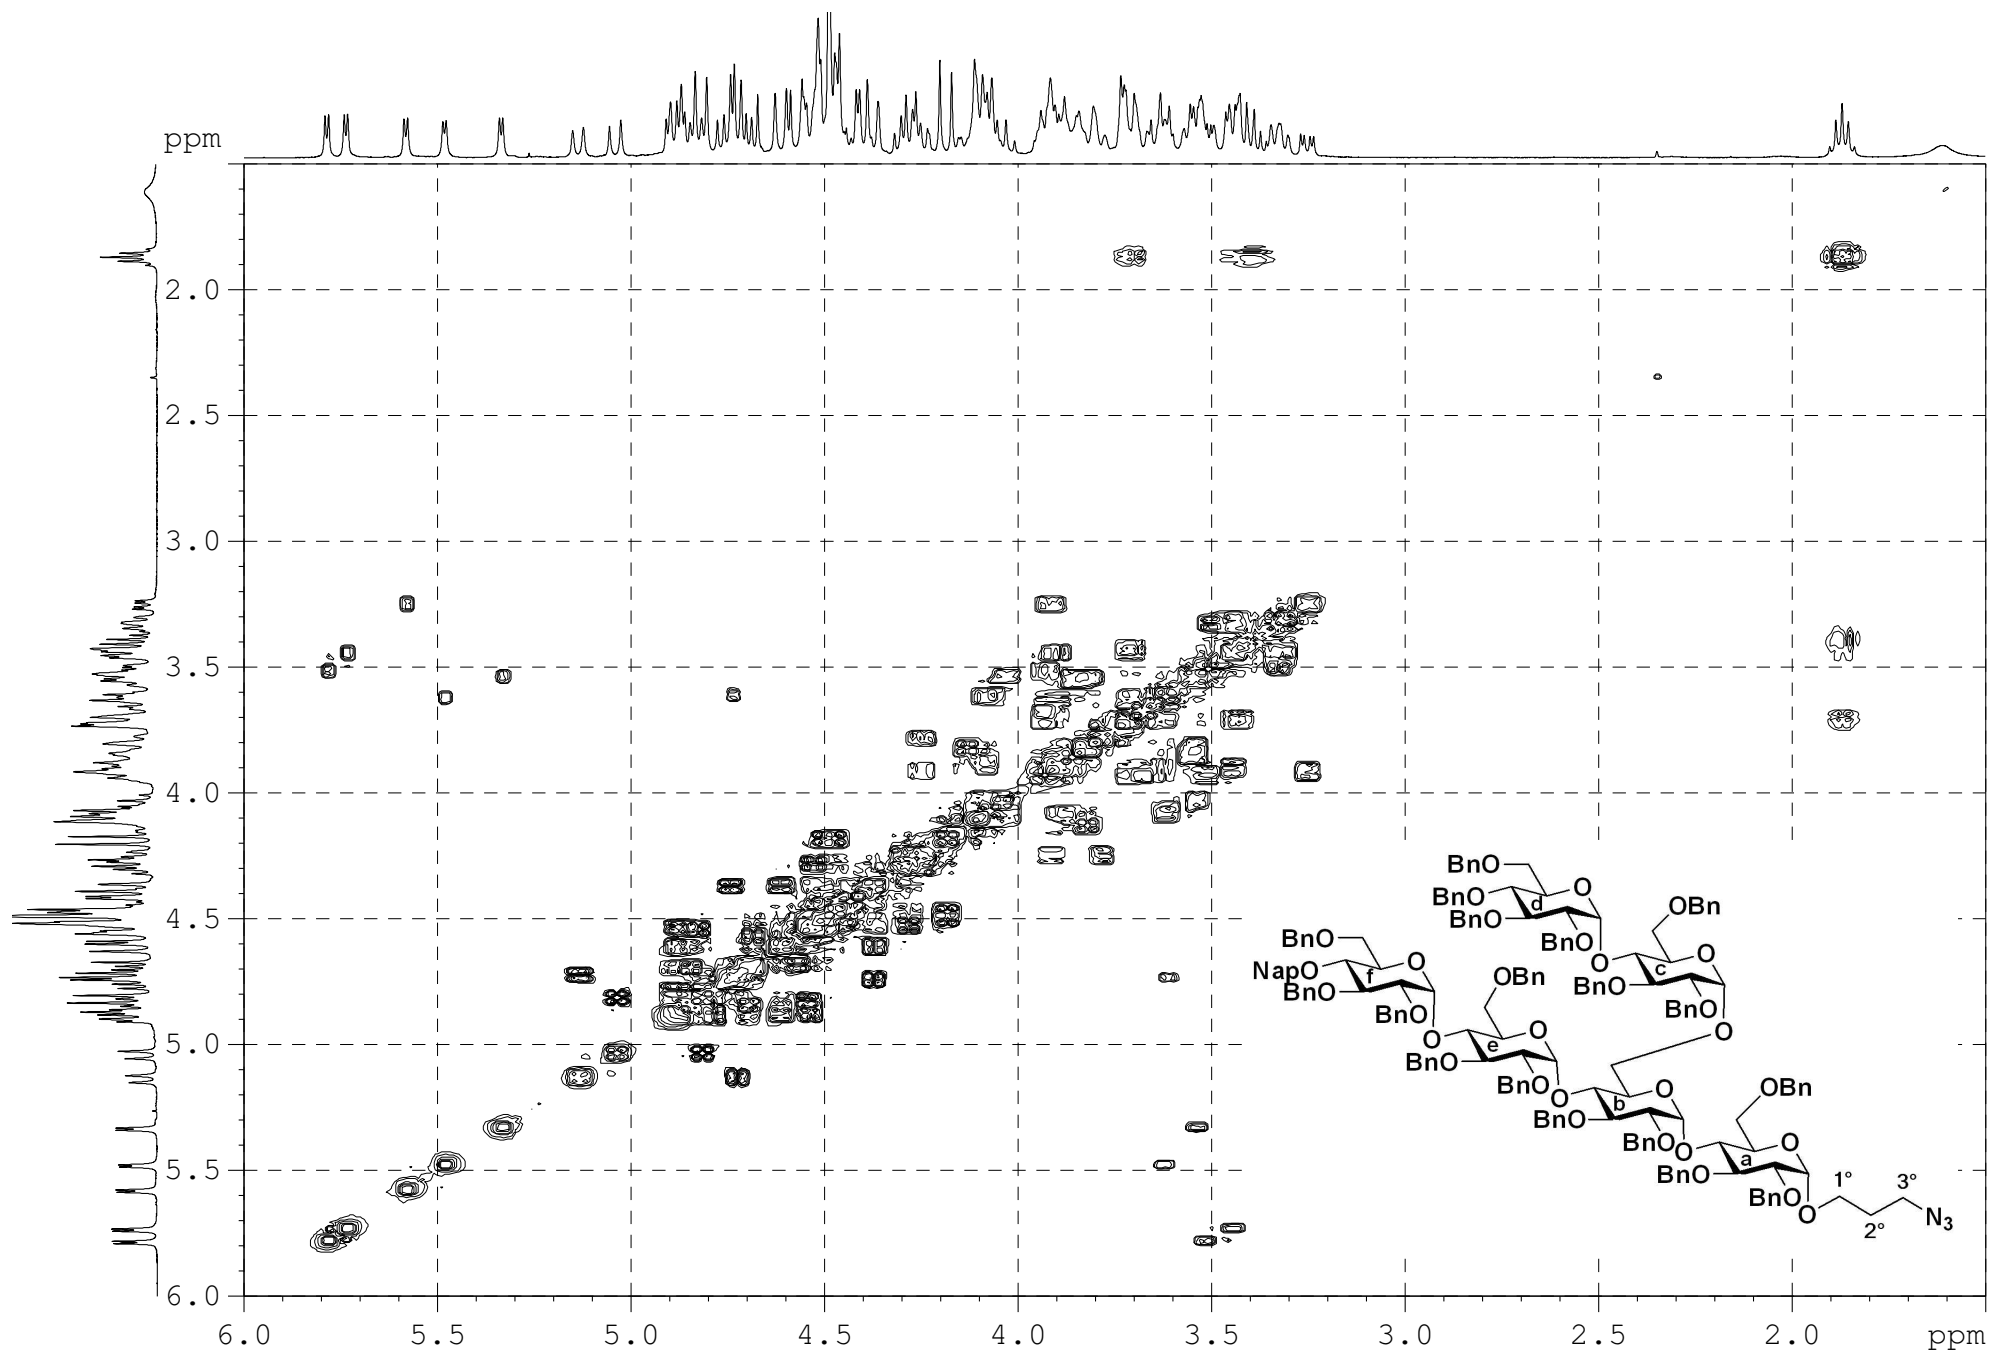

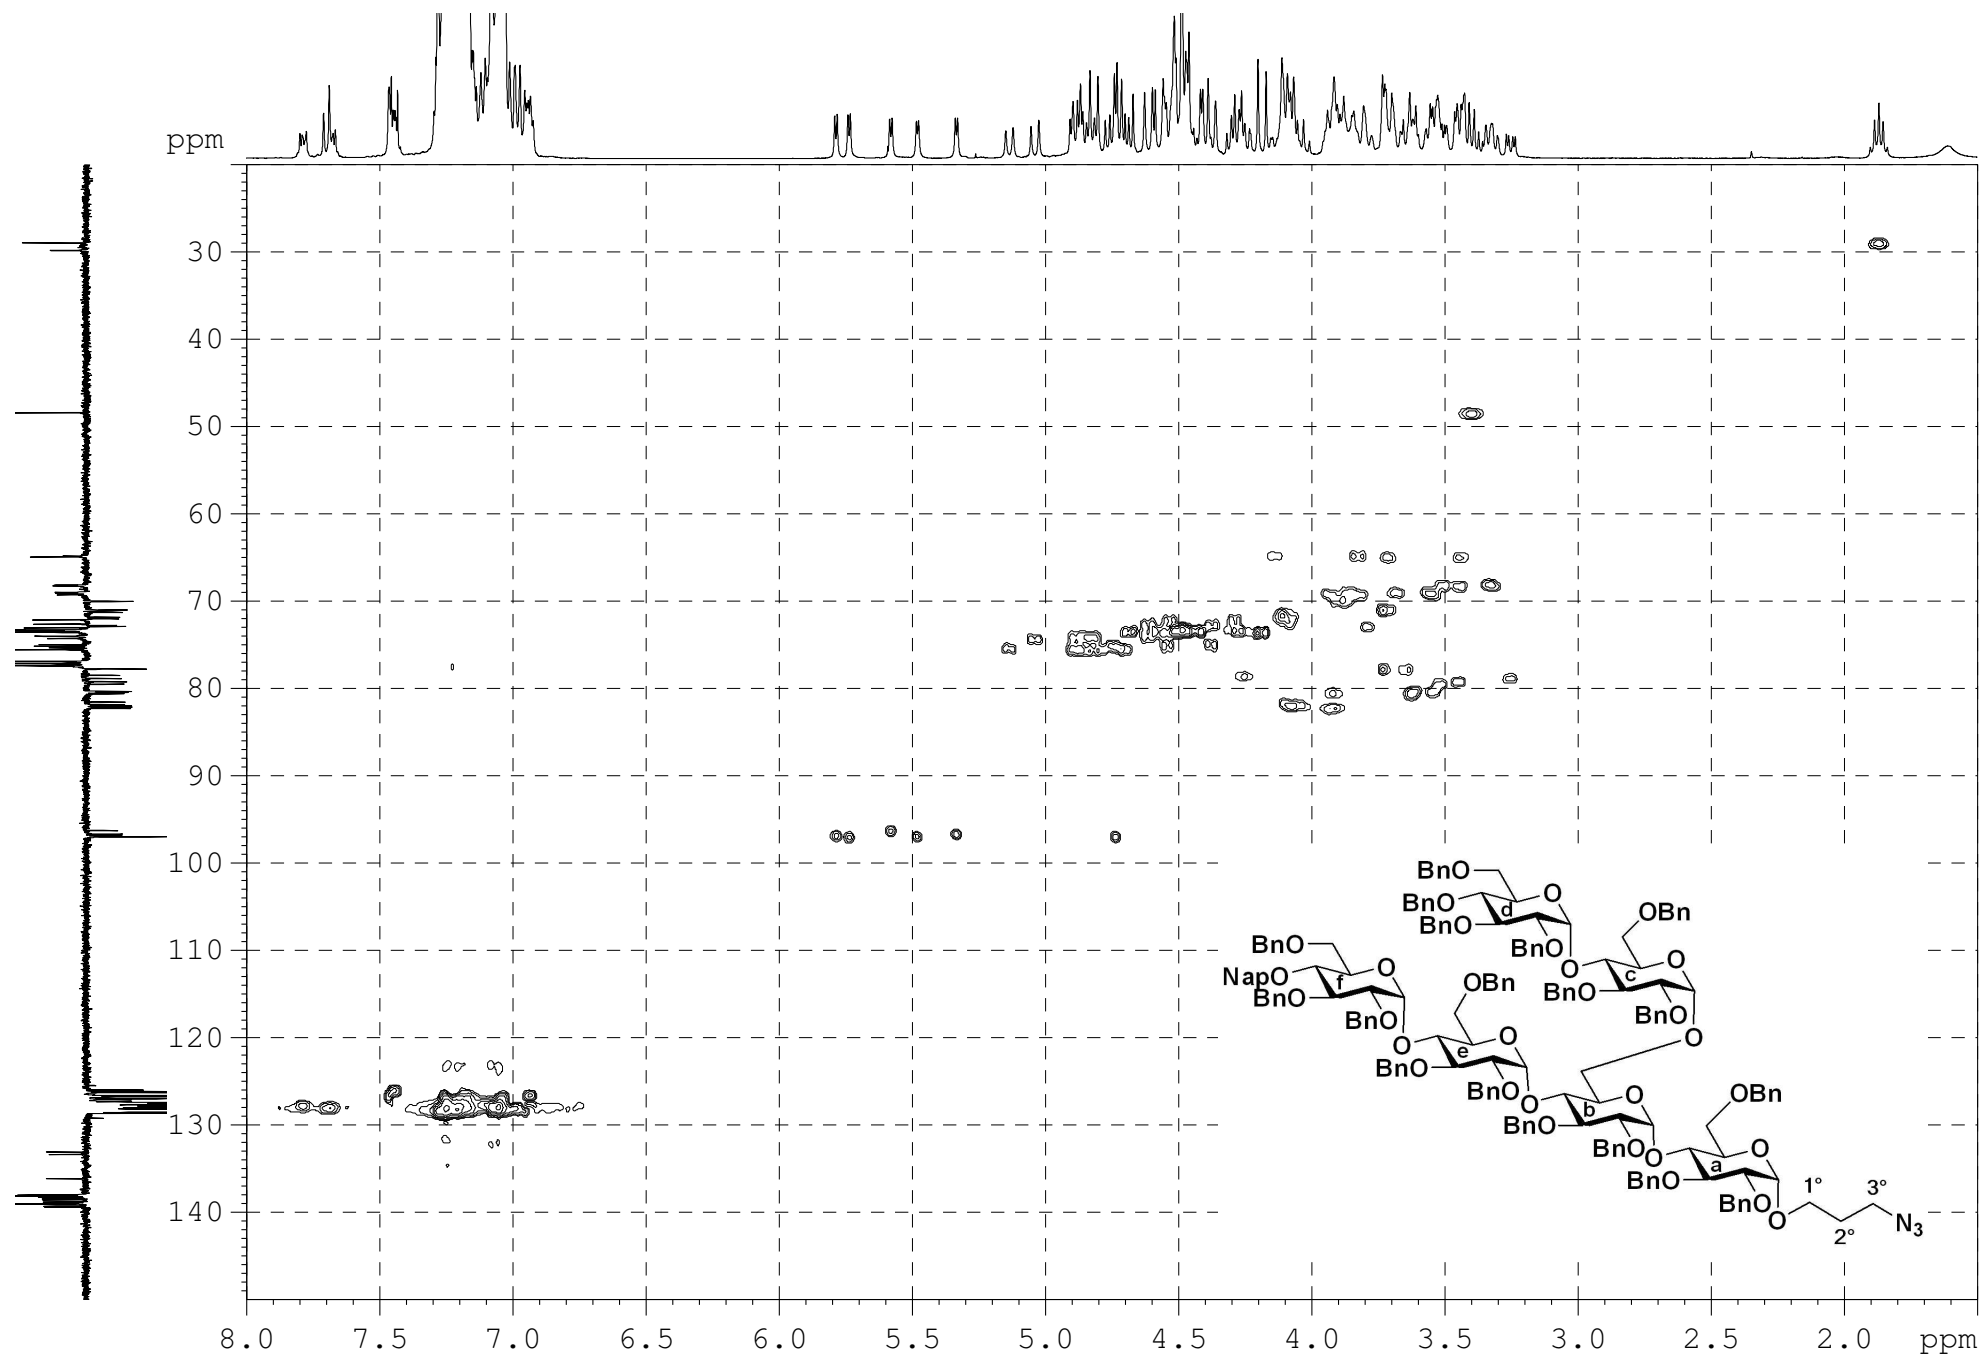



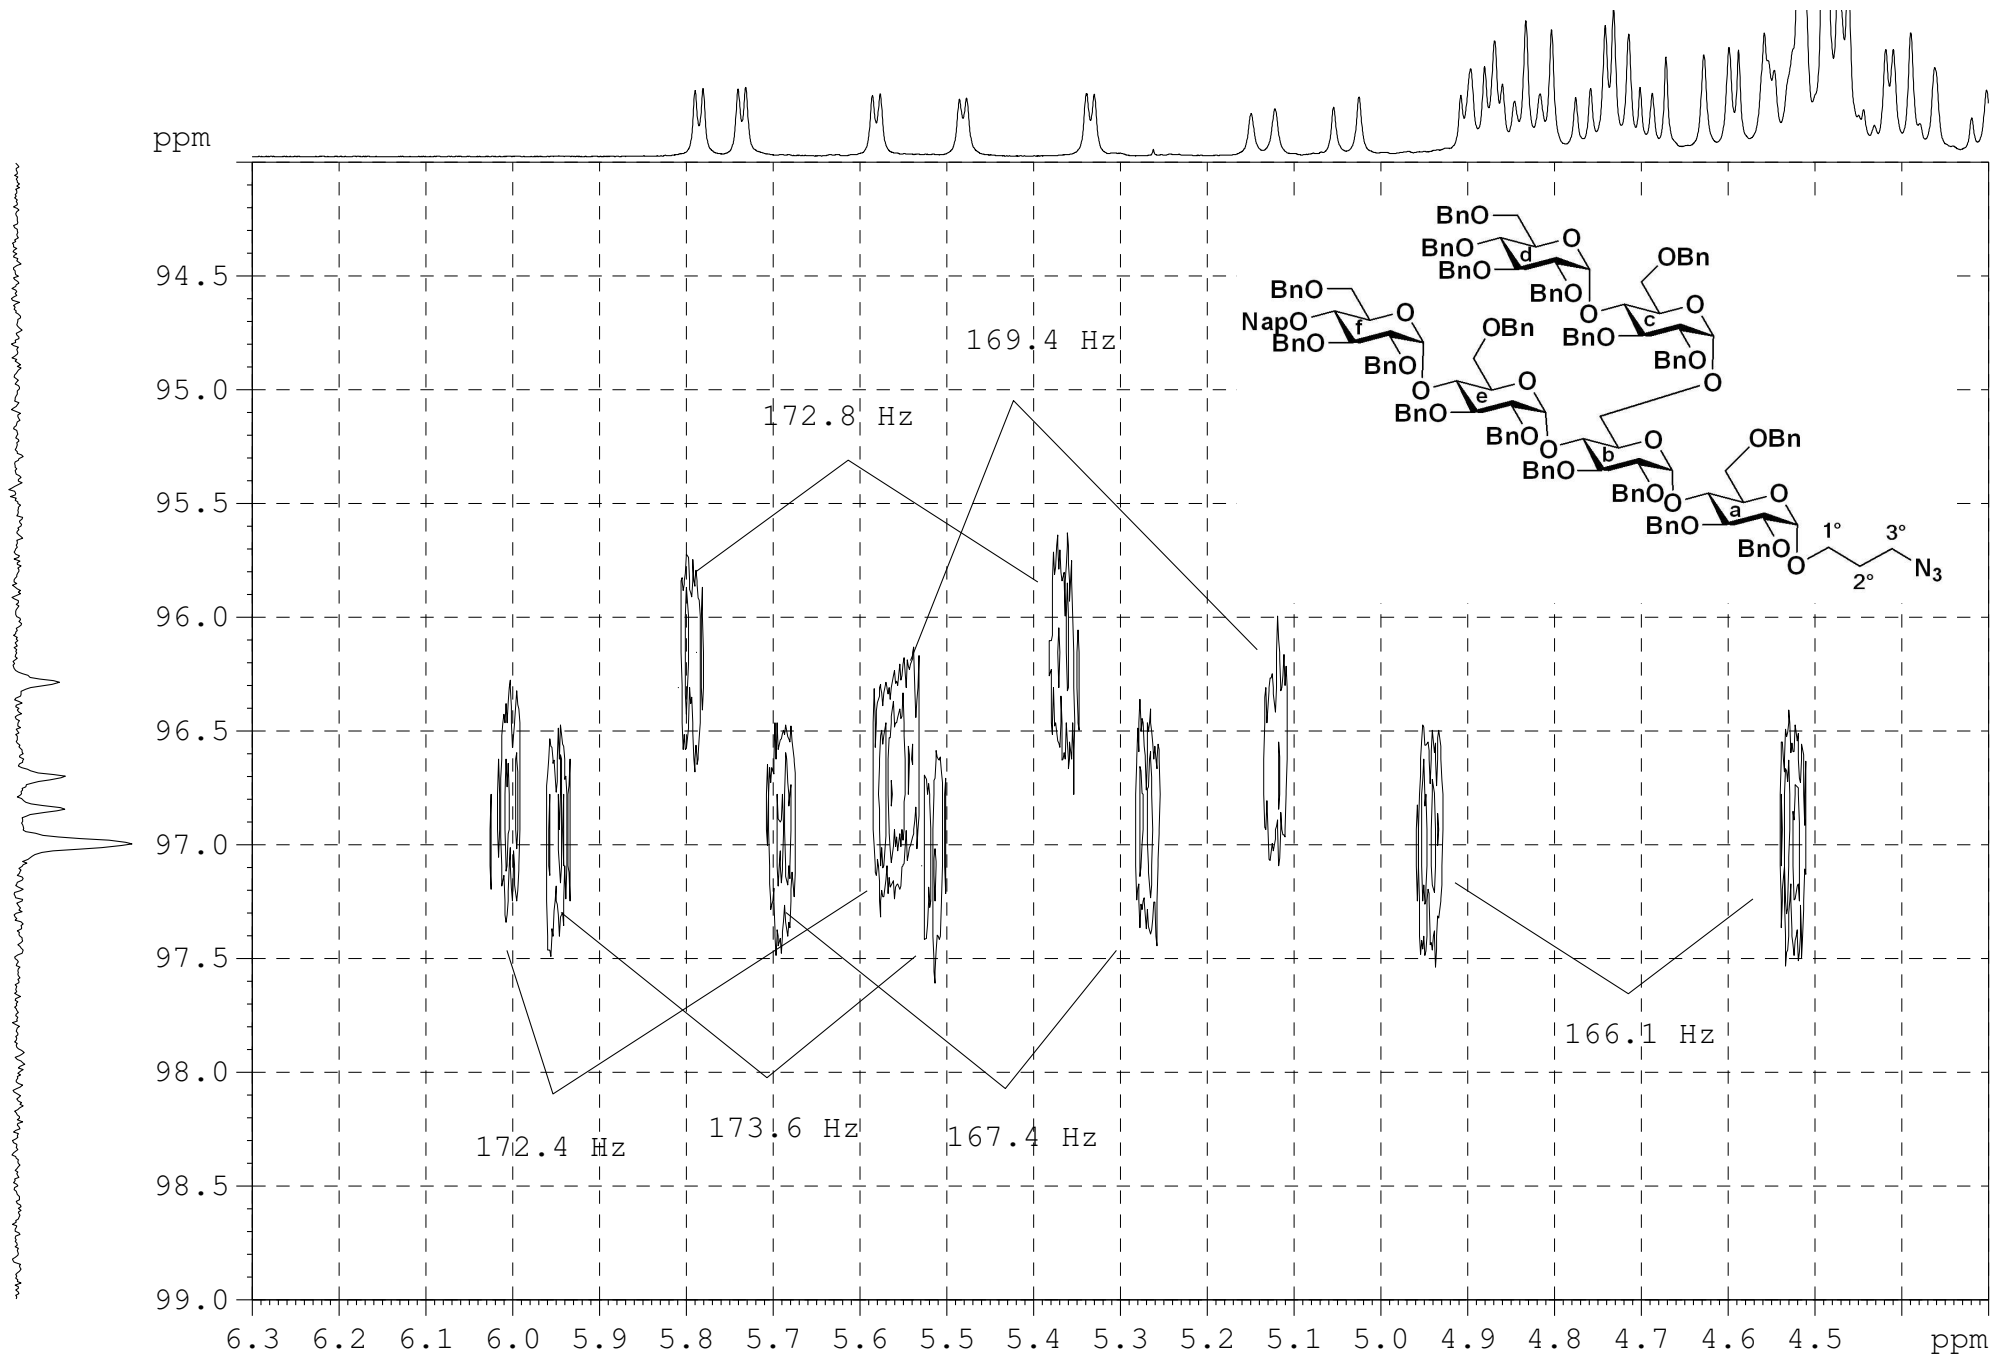

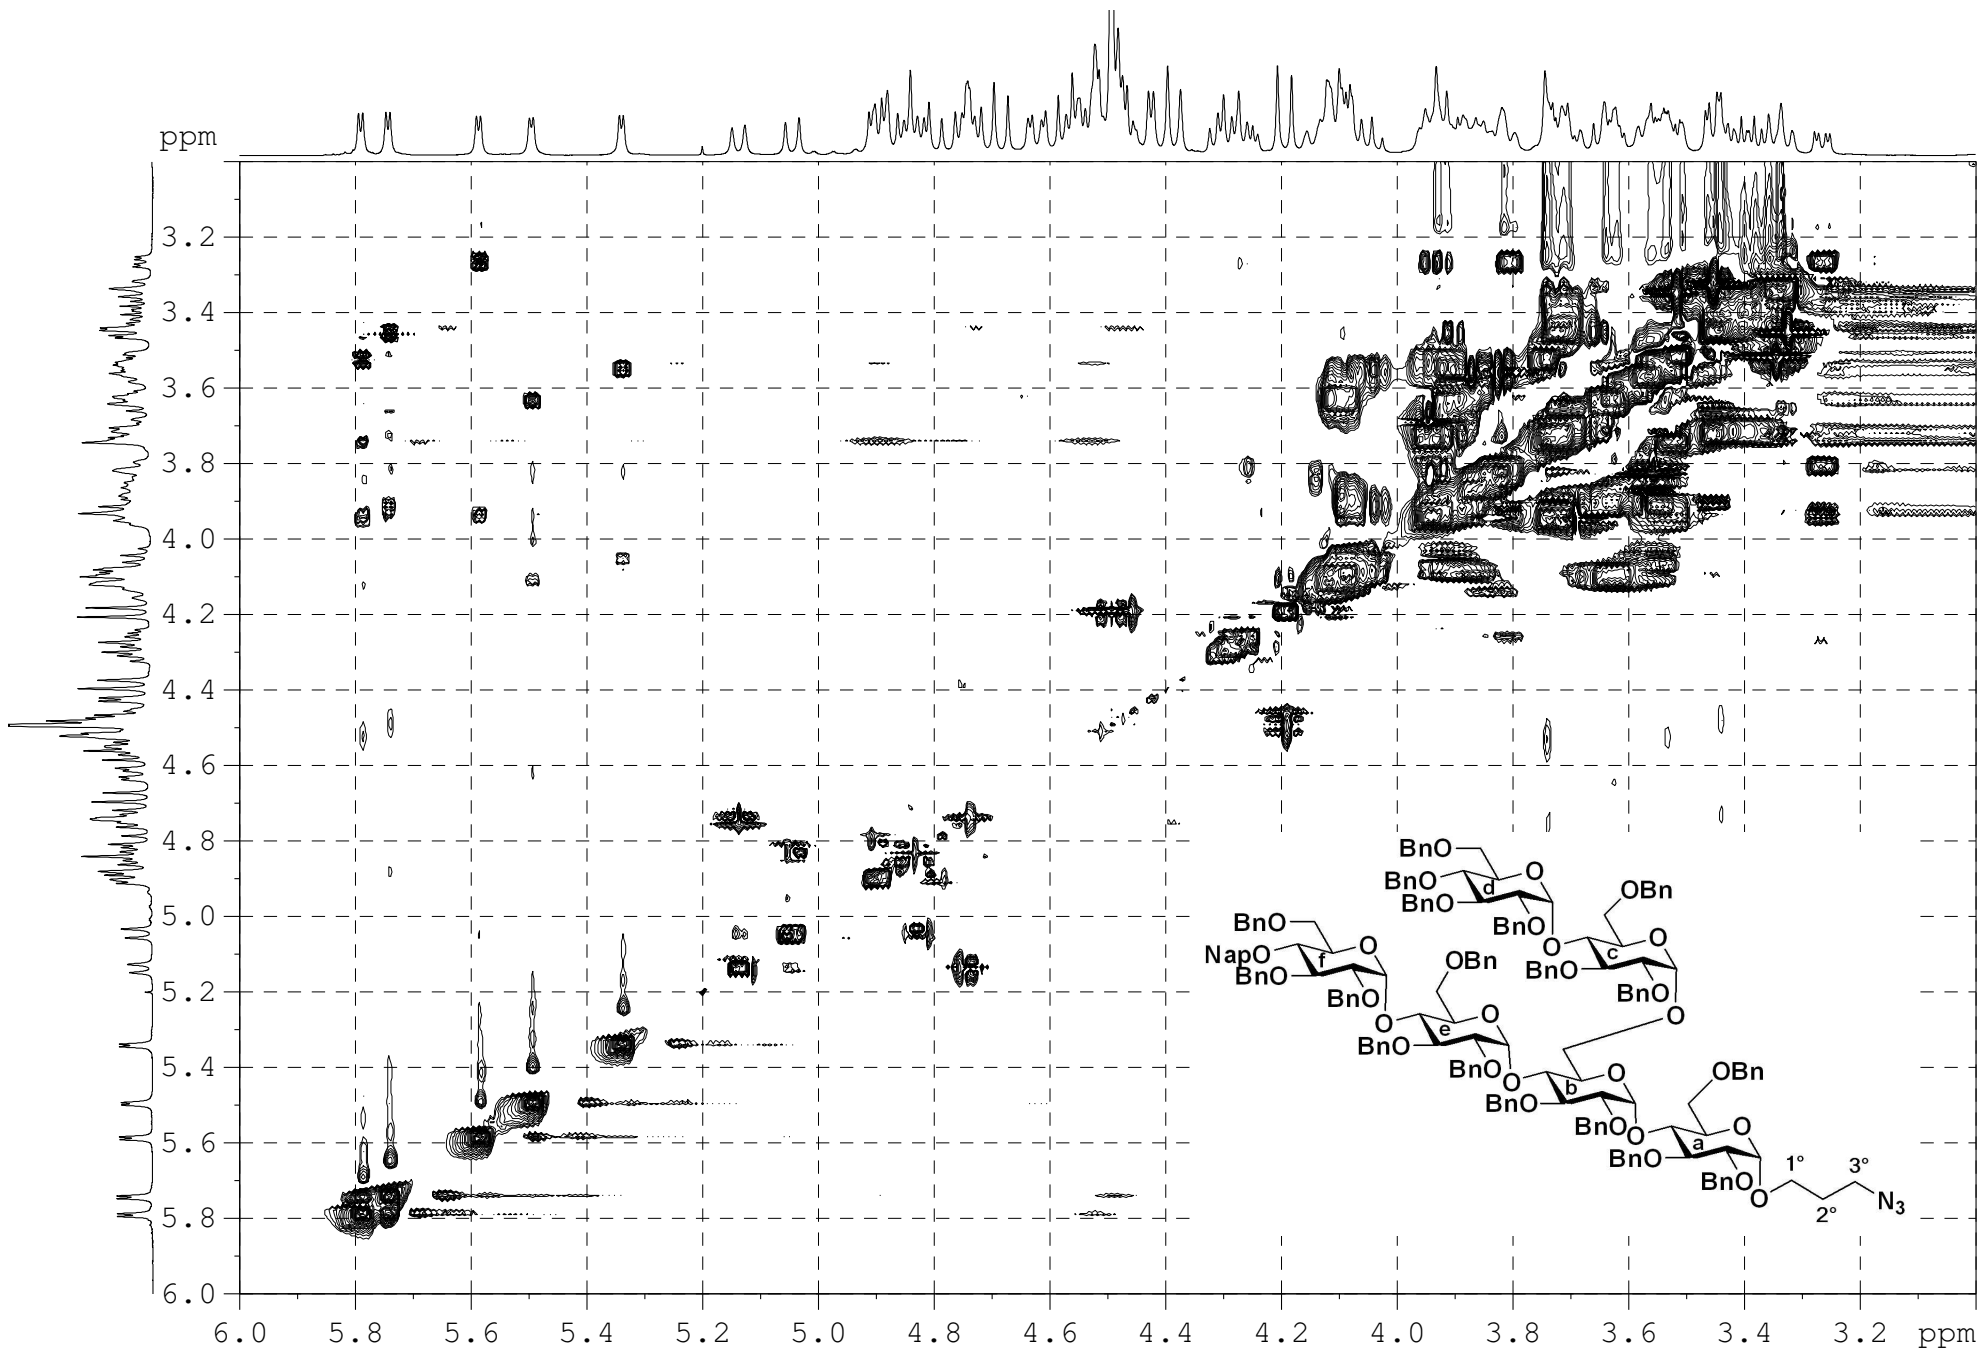

<sup>1</sup>H-NMR, <sup>13</sup>C-APT, <sup>1</sup>H-<sup>1</sup>H COSY, HSQC, HMBC, <sup>1</sup>H-<sup>1</sup>H cleantocsy **39**

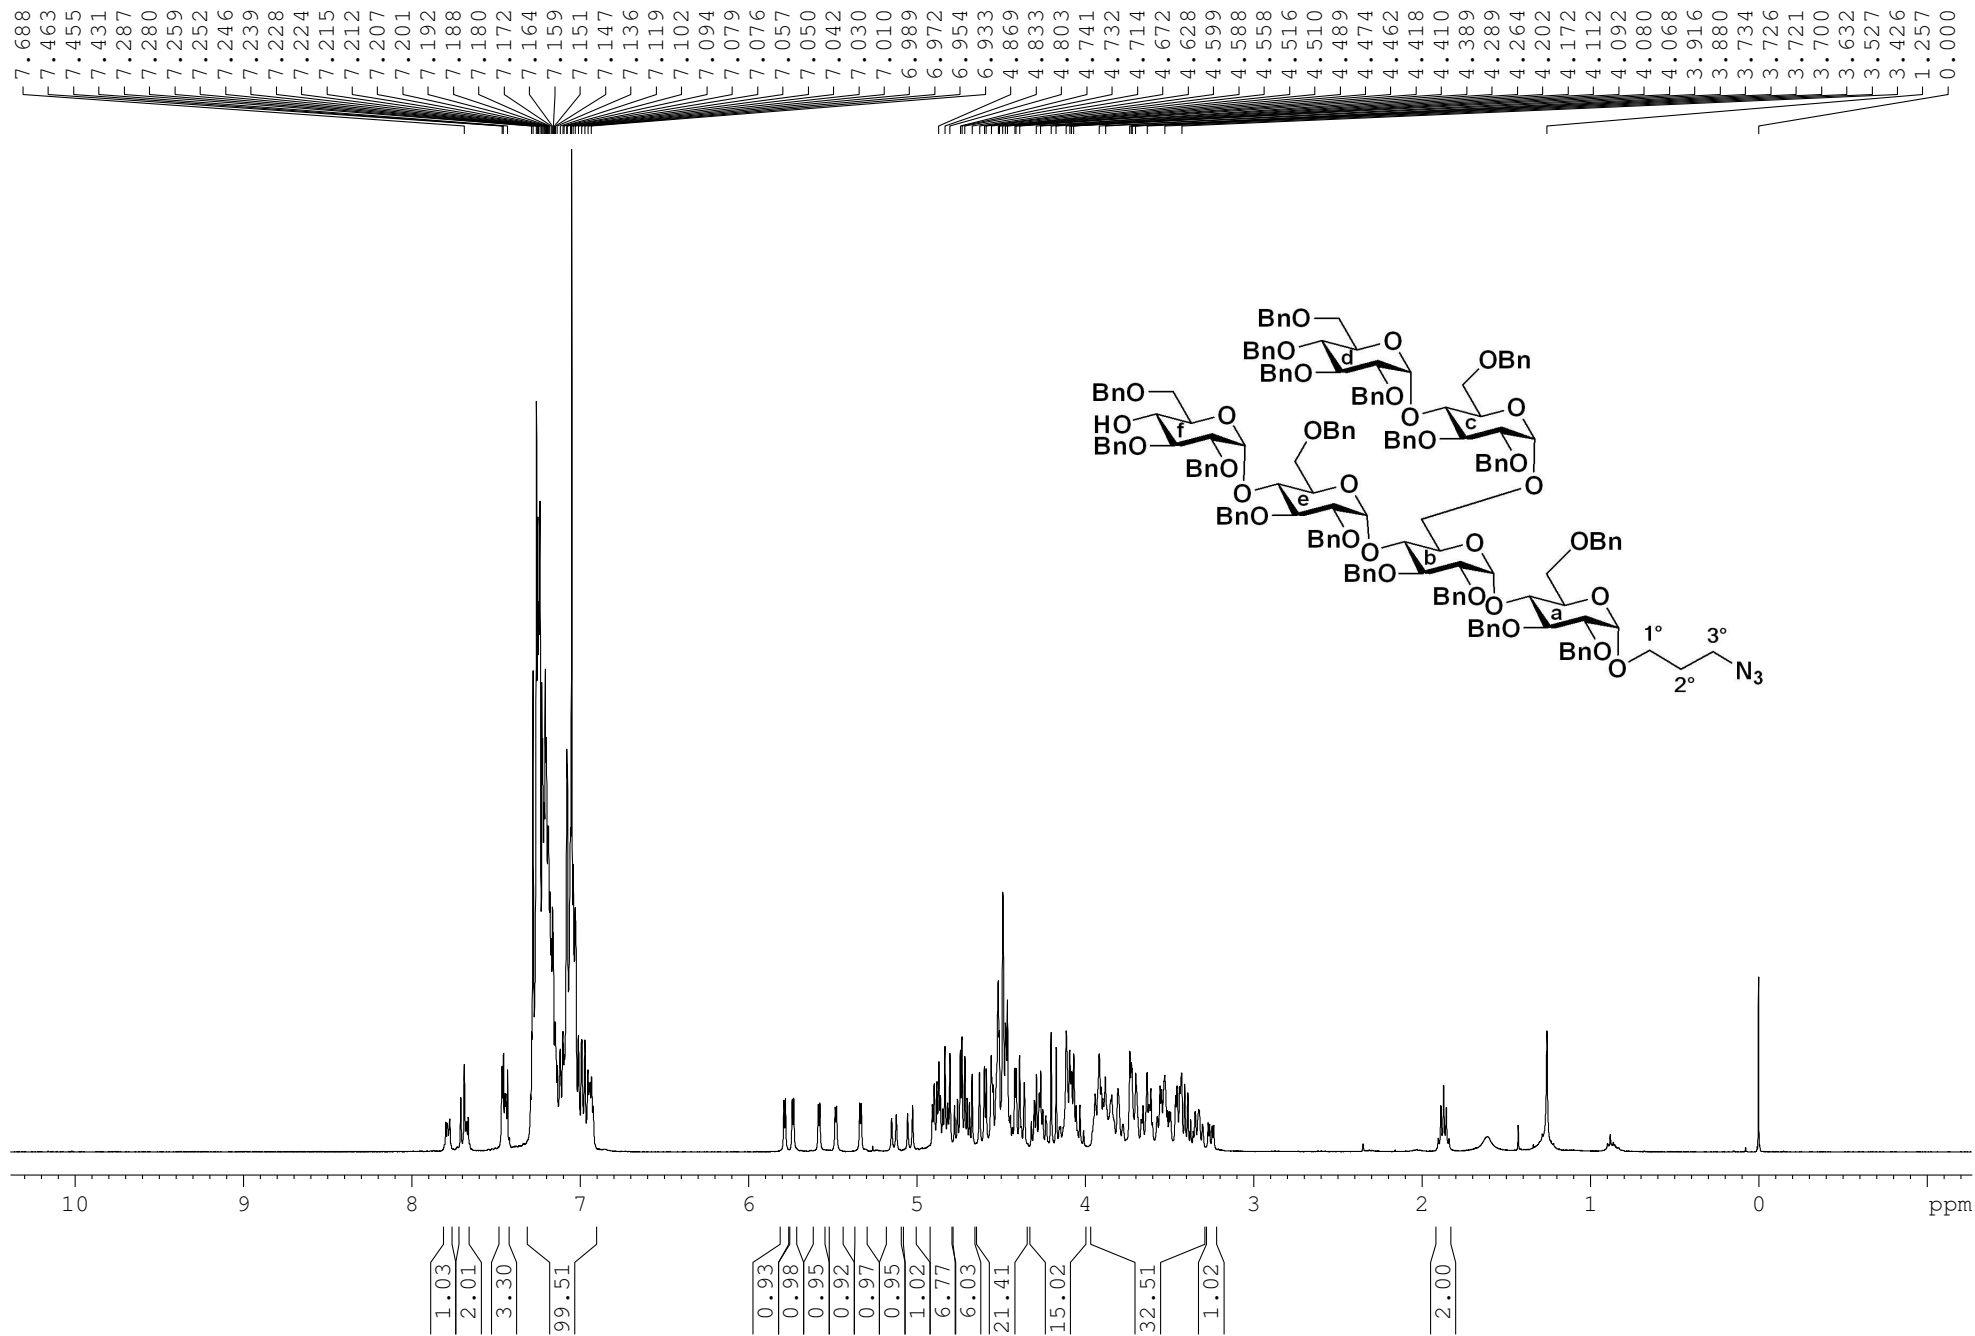



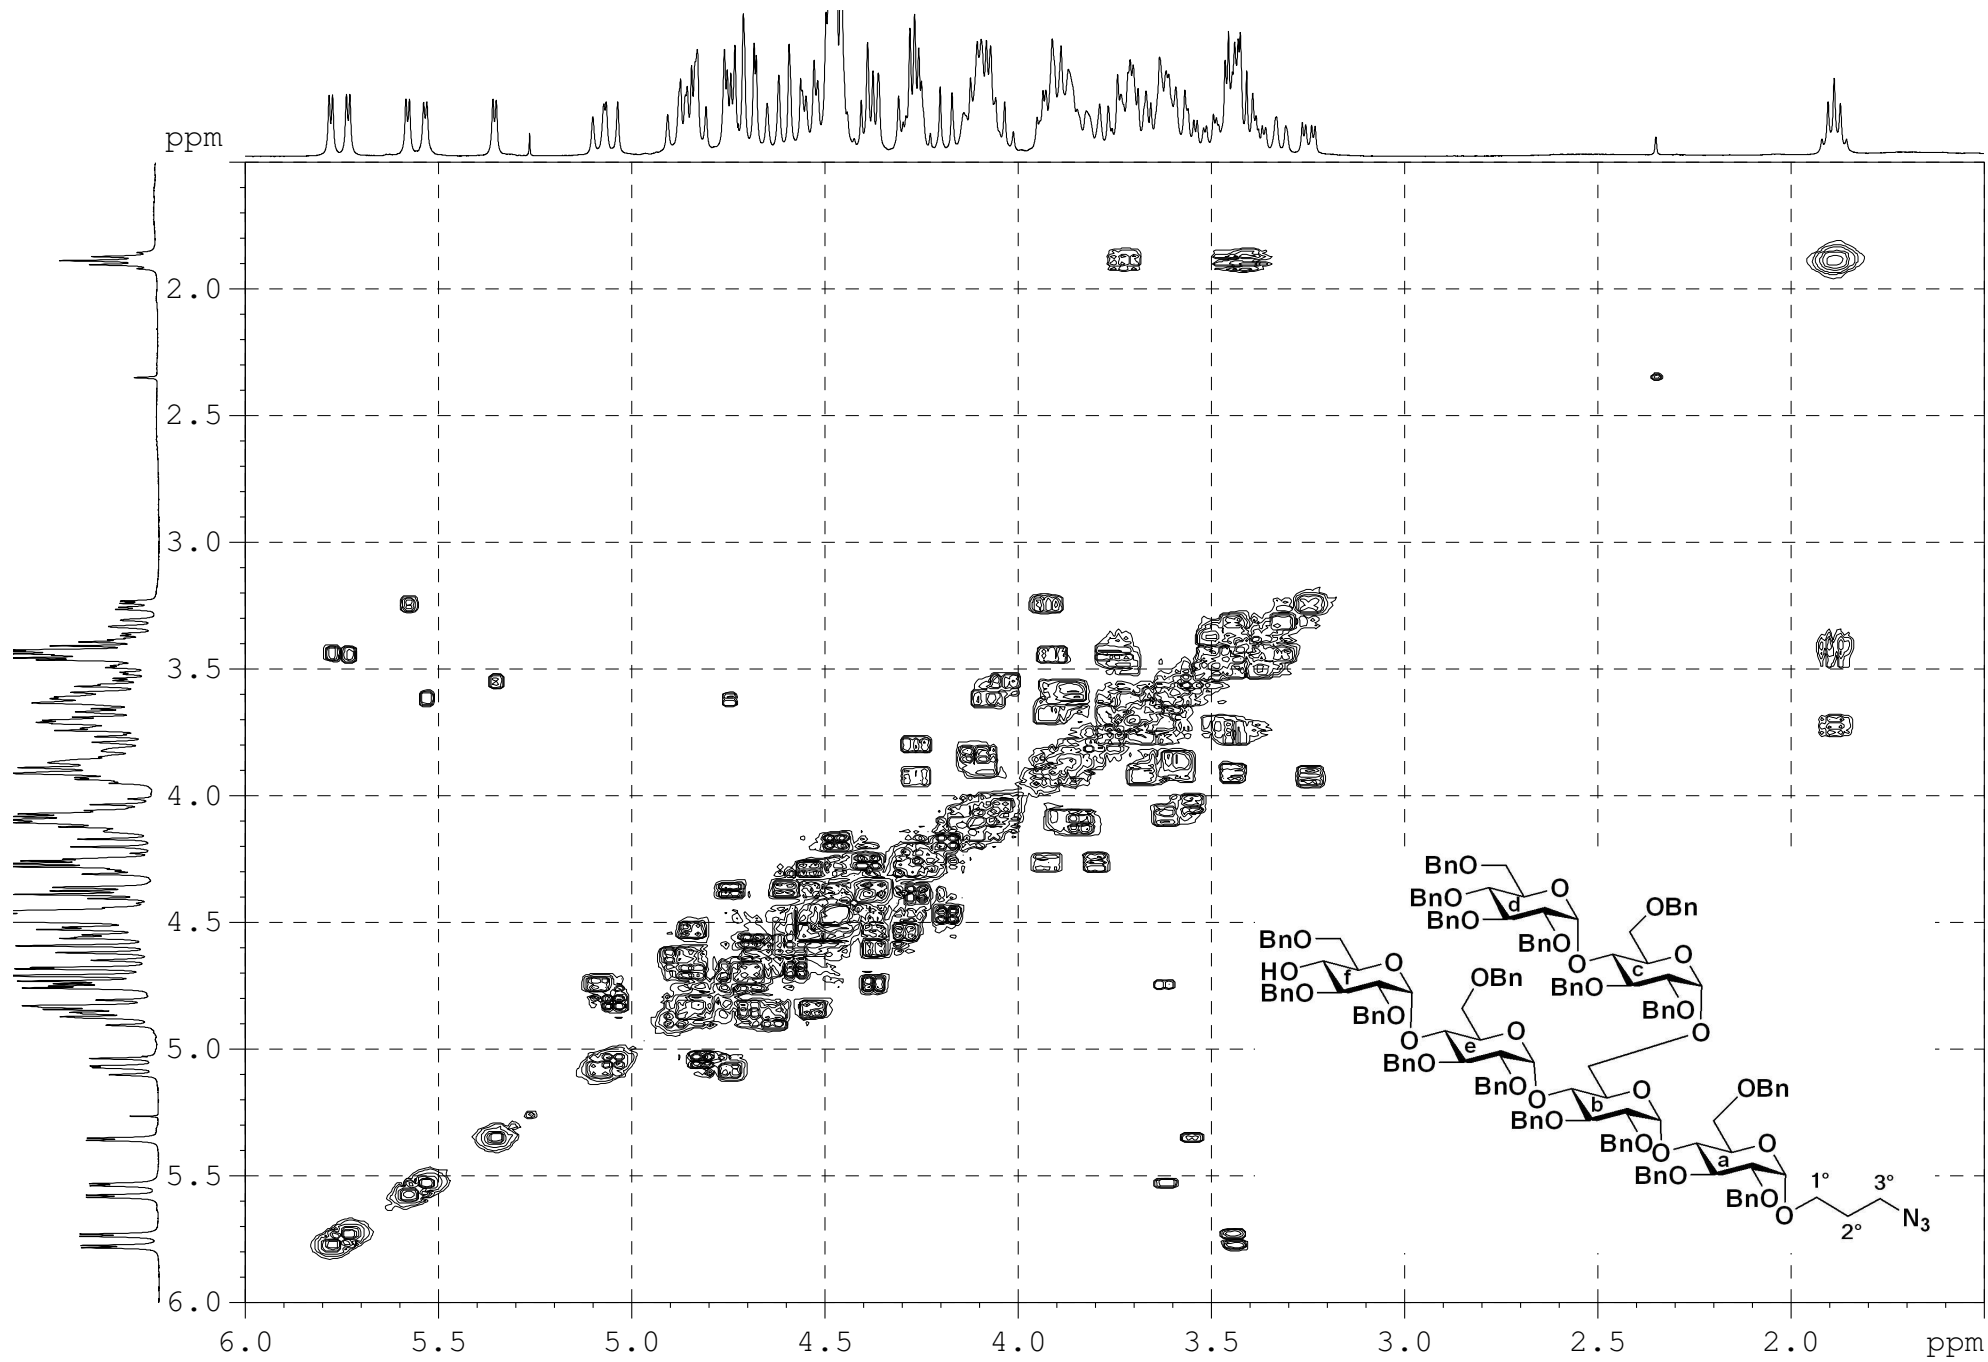



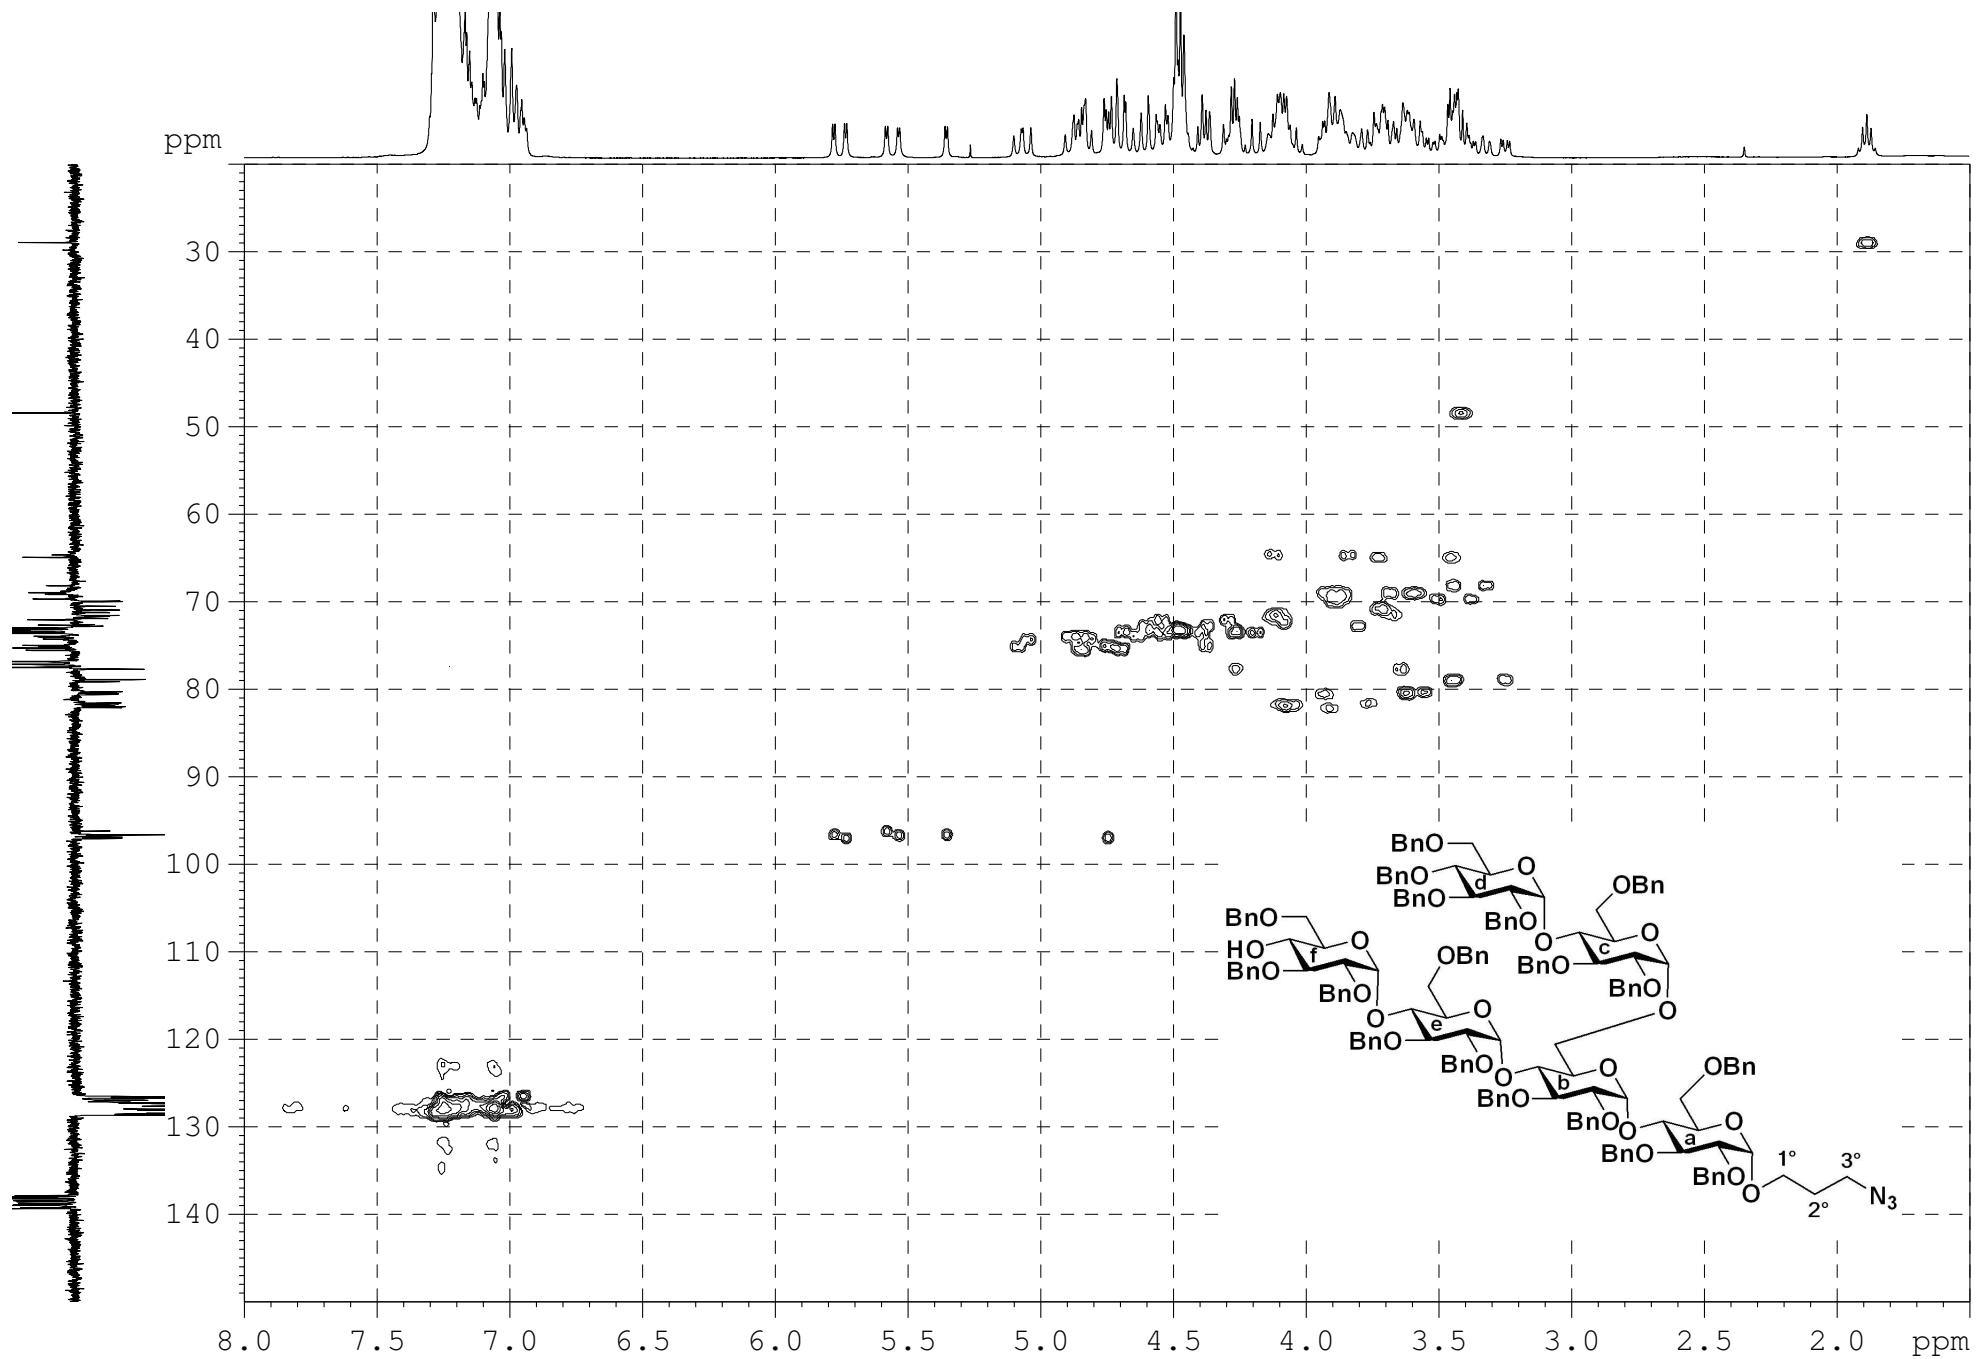



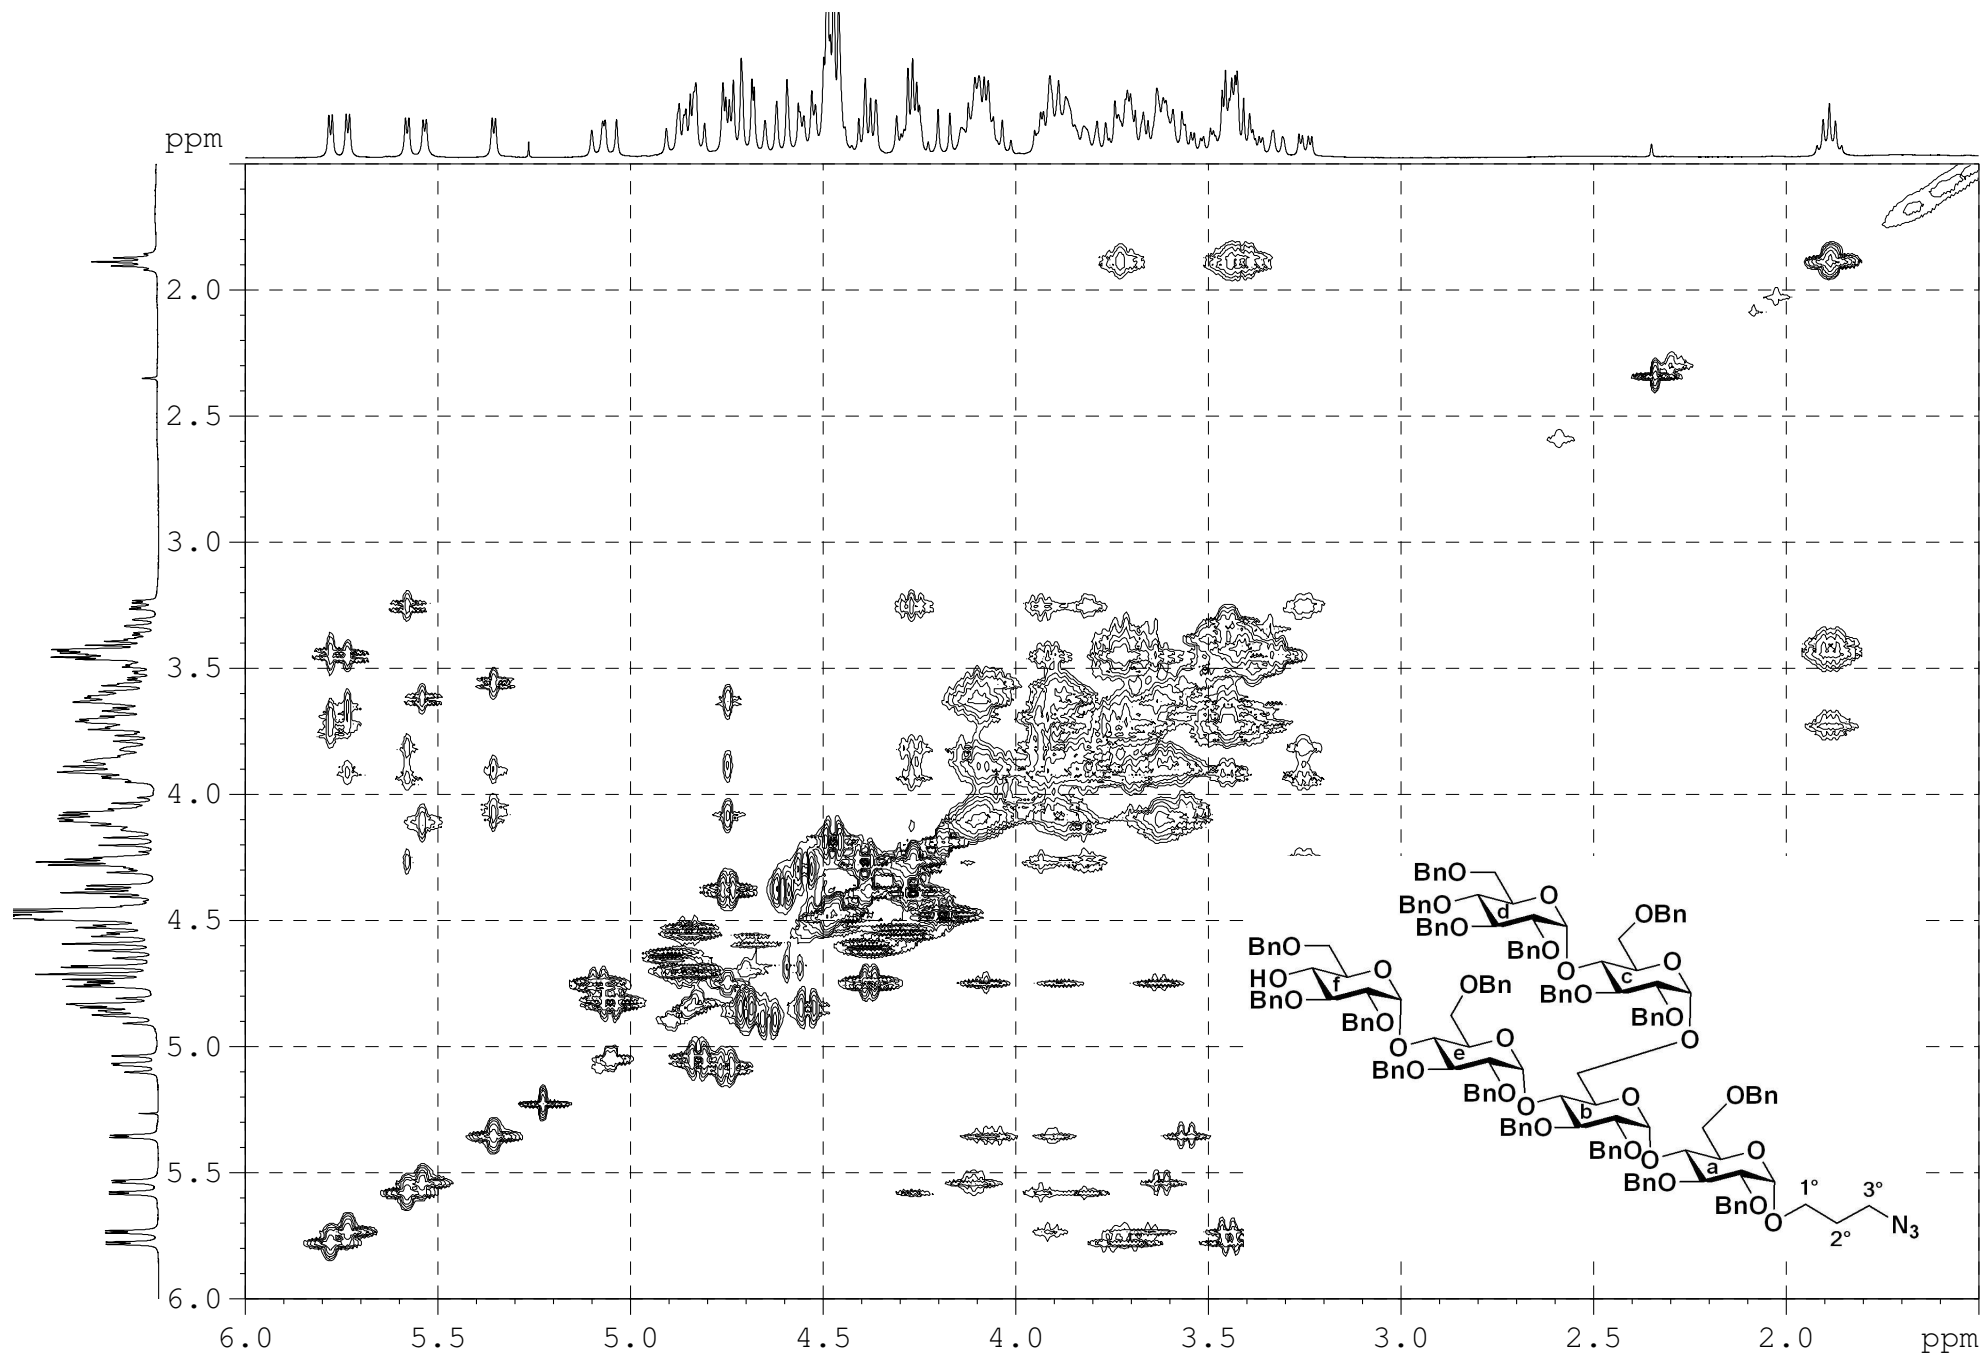

<sup>1</sup>H-NMR, <sup>13</sup>C-APT, <sup>1</sup>H-<sup>1</sup>H COSY, HSQC, HMBC, GATED, <sup>1</sup>H-<sup>1</sup>H cleantocsy **40**

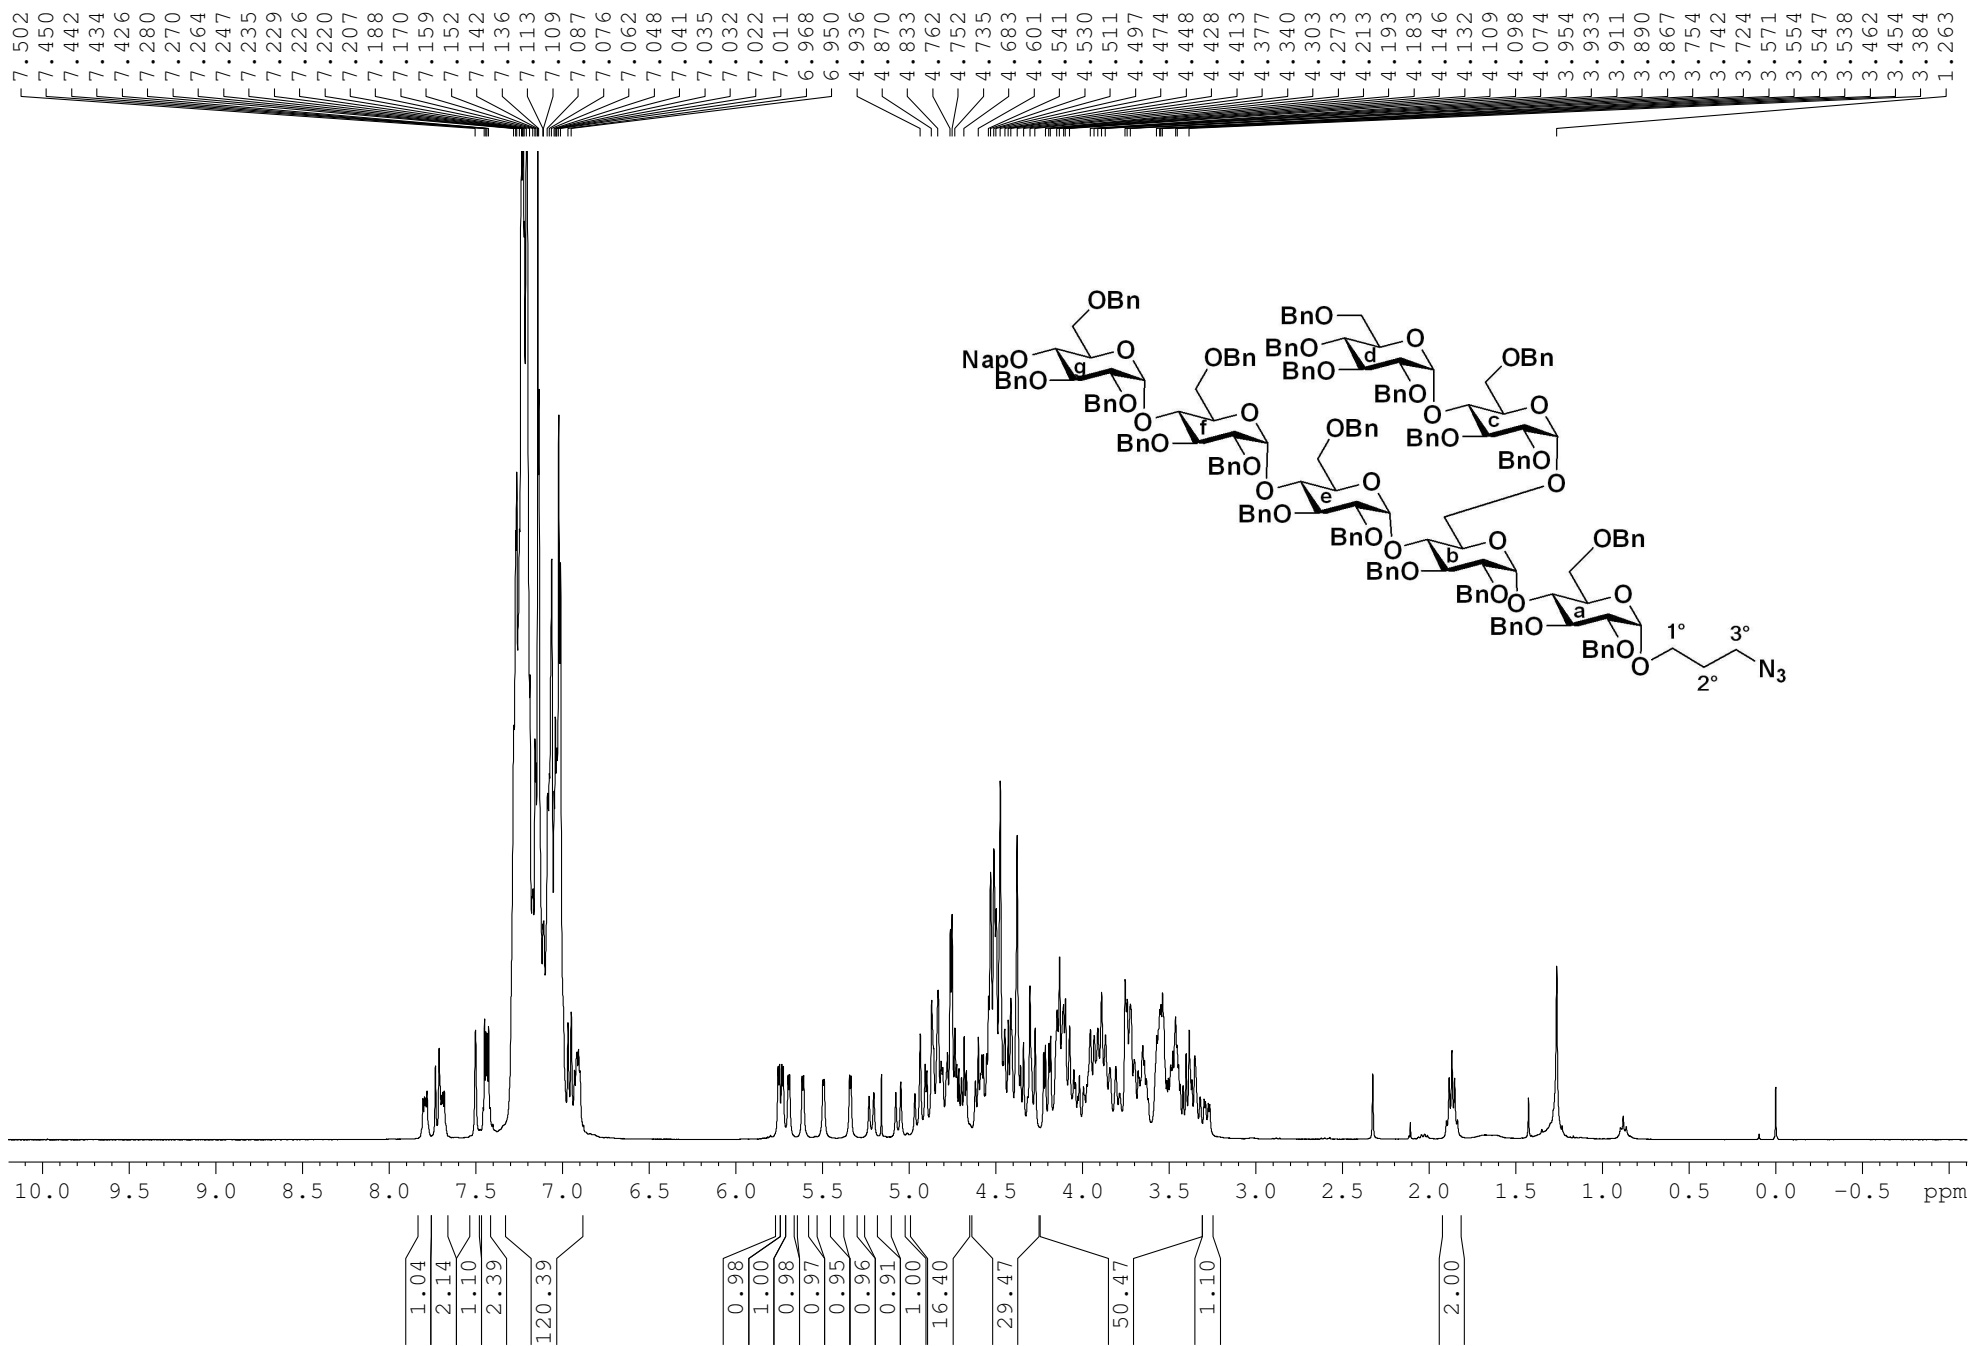

7.502  
7.450  
7.442  
7.434  
7.426  
7.280  
7.270  
7.264  
7.247  
7.235  
7.229  
7.226  
7.220  
7.207  
7.188  
7.170  
7.159  
7.152  
7.142  
7.136  
7.113  
7.109  
7.087  
7.076  
7.062  
7.048  
7.041  
7.035  
7.032  
7.022  
7.011  
6.968  
6.950  
4.936  
4.870  
4.833  
4.762  
4.752  
4.735  
4.683  
4.601  
4.541  
4.530  
4.511  
4.497  
4.474  
4.448  
4.428  
4.413  
4.377  
4.340  
4.303  
4.273  
4.213  
4.193  
4.183  
4.146  
4.132  
4.109  
4.098  
4.074  
3.954  
3.933  
3.911  
3.890  
3.867  
3.754  
3.742  
3.724  
3.571  
3.554  
3.547  
3.538  
3.462  
3.454  
3.384  
1.263

10.0 9.5 9.0 8.5 8.0 7.5 7.0 6.5 6.0 5.5 5.0 4.5 4.0 3.5 3.0 2.5 2.0 1.5 1.0 0.5 0.0 -0.5 ppm

1.04  
2.14  
1.10  
2.39  
120.39  
0.98  
1.00  
0.98  
0.97  
0.95  
0.96  
0.91  
1.00  
16.40  
29.47  
50.47  
1.10  
2.00

S200

139.25  
139.13  
138.97  
138.89  
138.84  
138.78  
138.65  
138.45  
138.38  
138.17  
138.12  
138.10  
138.08  
138.03  
138.00  
137.95  
137.82  
137.78  
137.63  
136.03  
133.25  
132.93  
97.04  
96.77  
96.64  
96.25  
96.15  
82.18  
82.07  
81.93  
81.84  
81.77  
81.26  
80.63  
80.34  
80.26  
80.20  
79.58  
79.52  
79.21  
78.79  
78.64  
77.64  
77.47  
77.16  
76.84  
75.55  
75.46  
75.05  
74.92  
74.22  
74.02  
73.93  
73.86  
73.48  
73.45  
73.40  
73.30  
73.24  
73.04  
72.97  
72.53  
72.46  
72.26  
72.19  
72.00  
71.84  
71.14  
70.80  
68.99  
68.85  
68.71  
68.08  
64.81  
64.69  
48.29  
29.72  
28.83

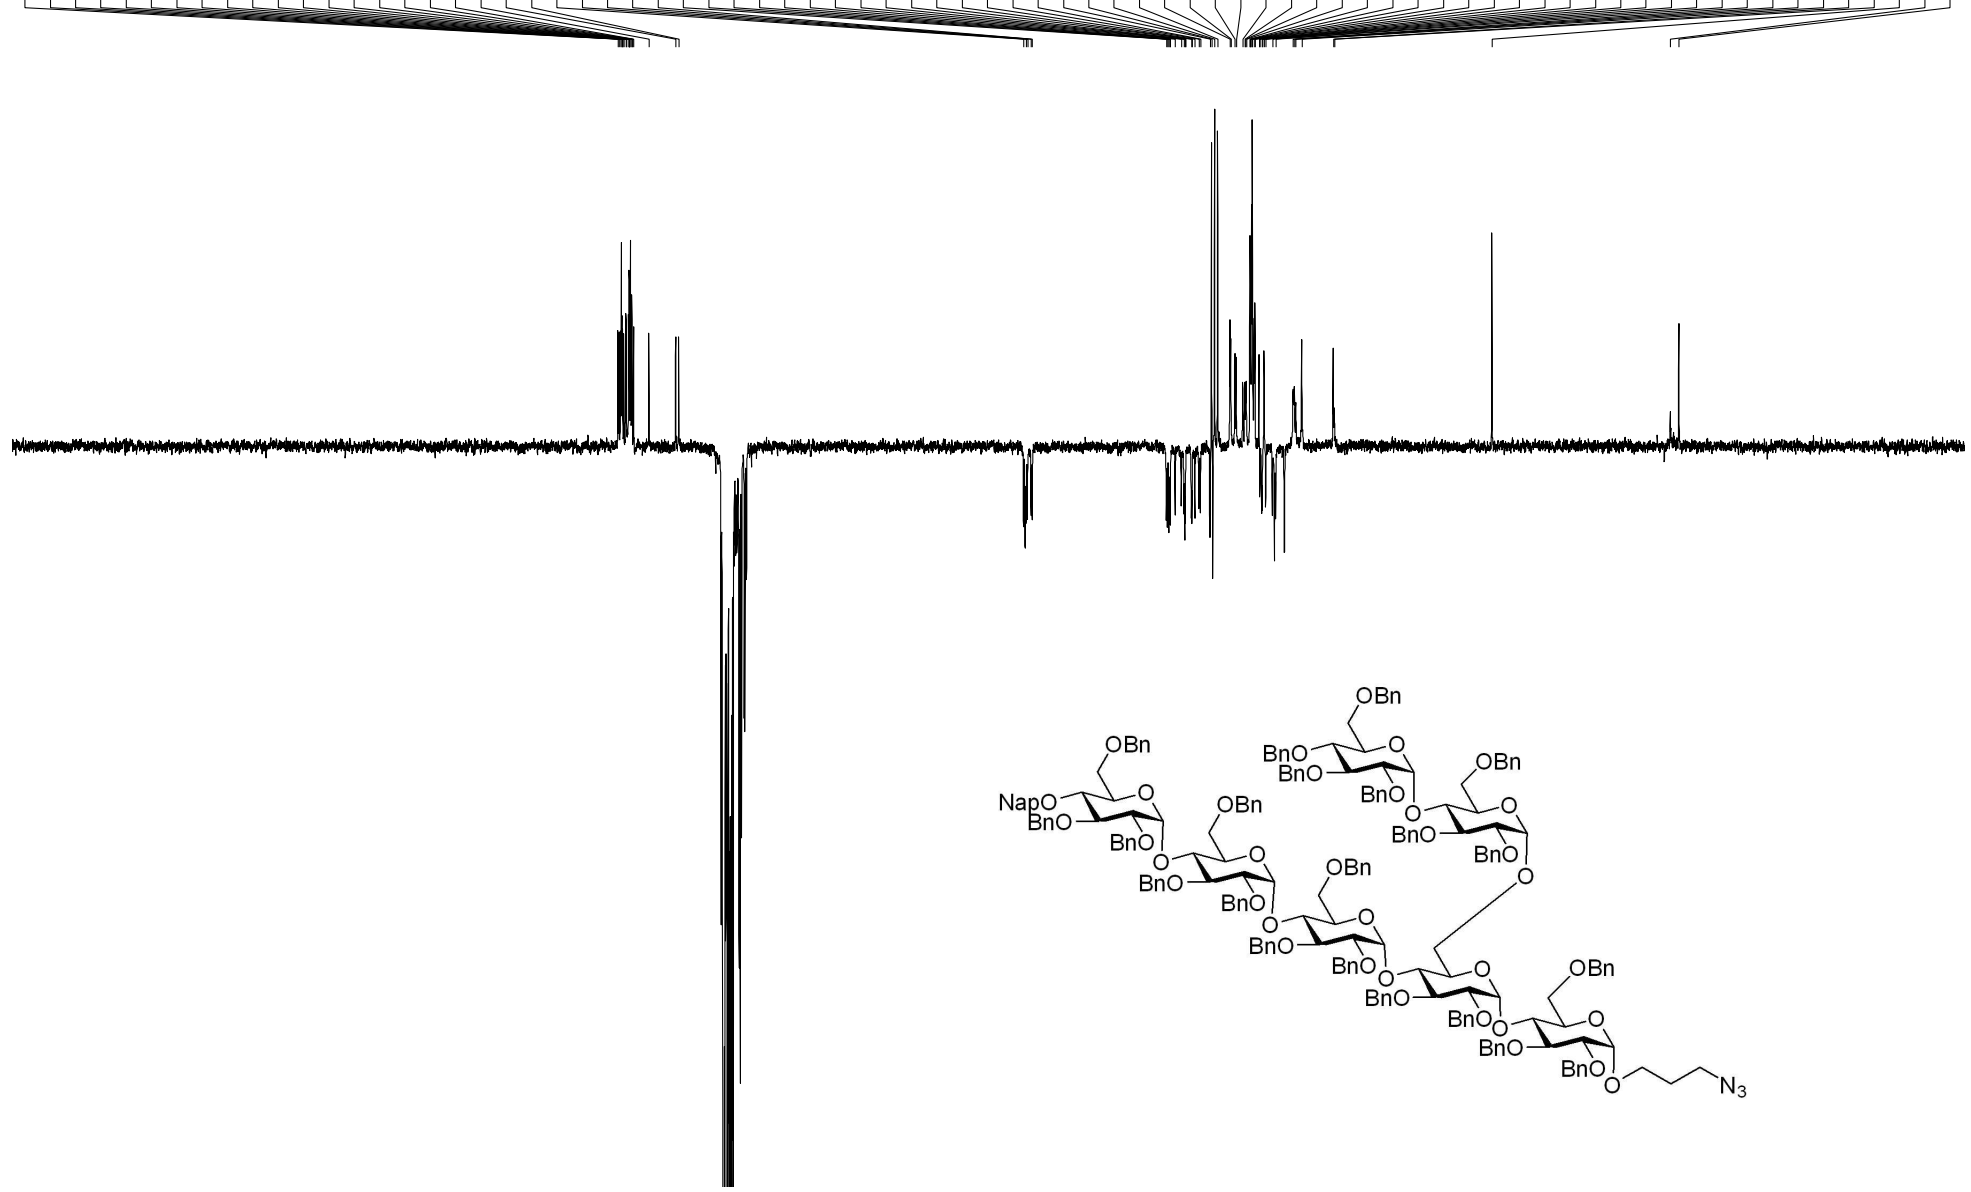

200 190 180 170 160 150 140 130 120 110 100 90 80 70 60 50 40 30 20 10 ppm

S201





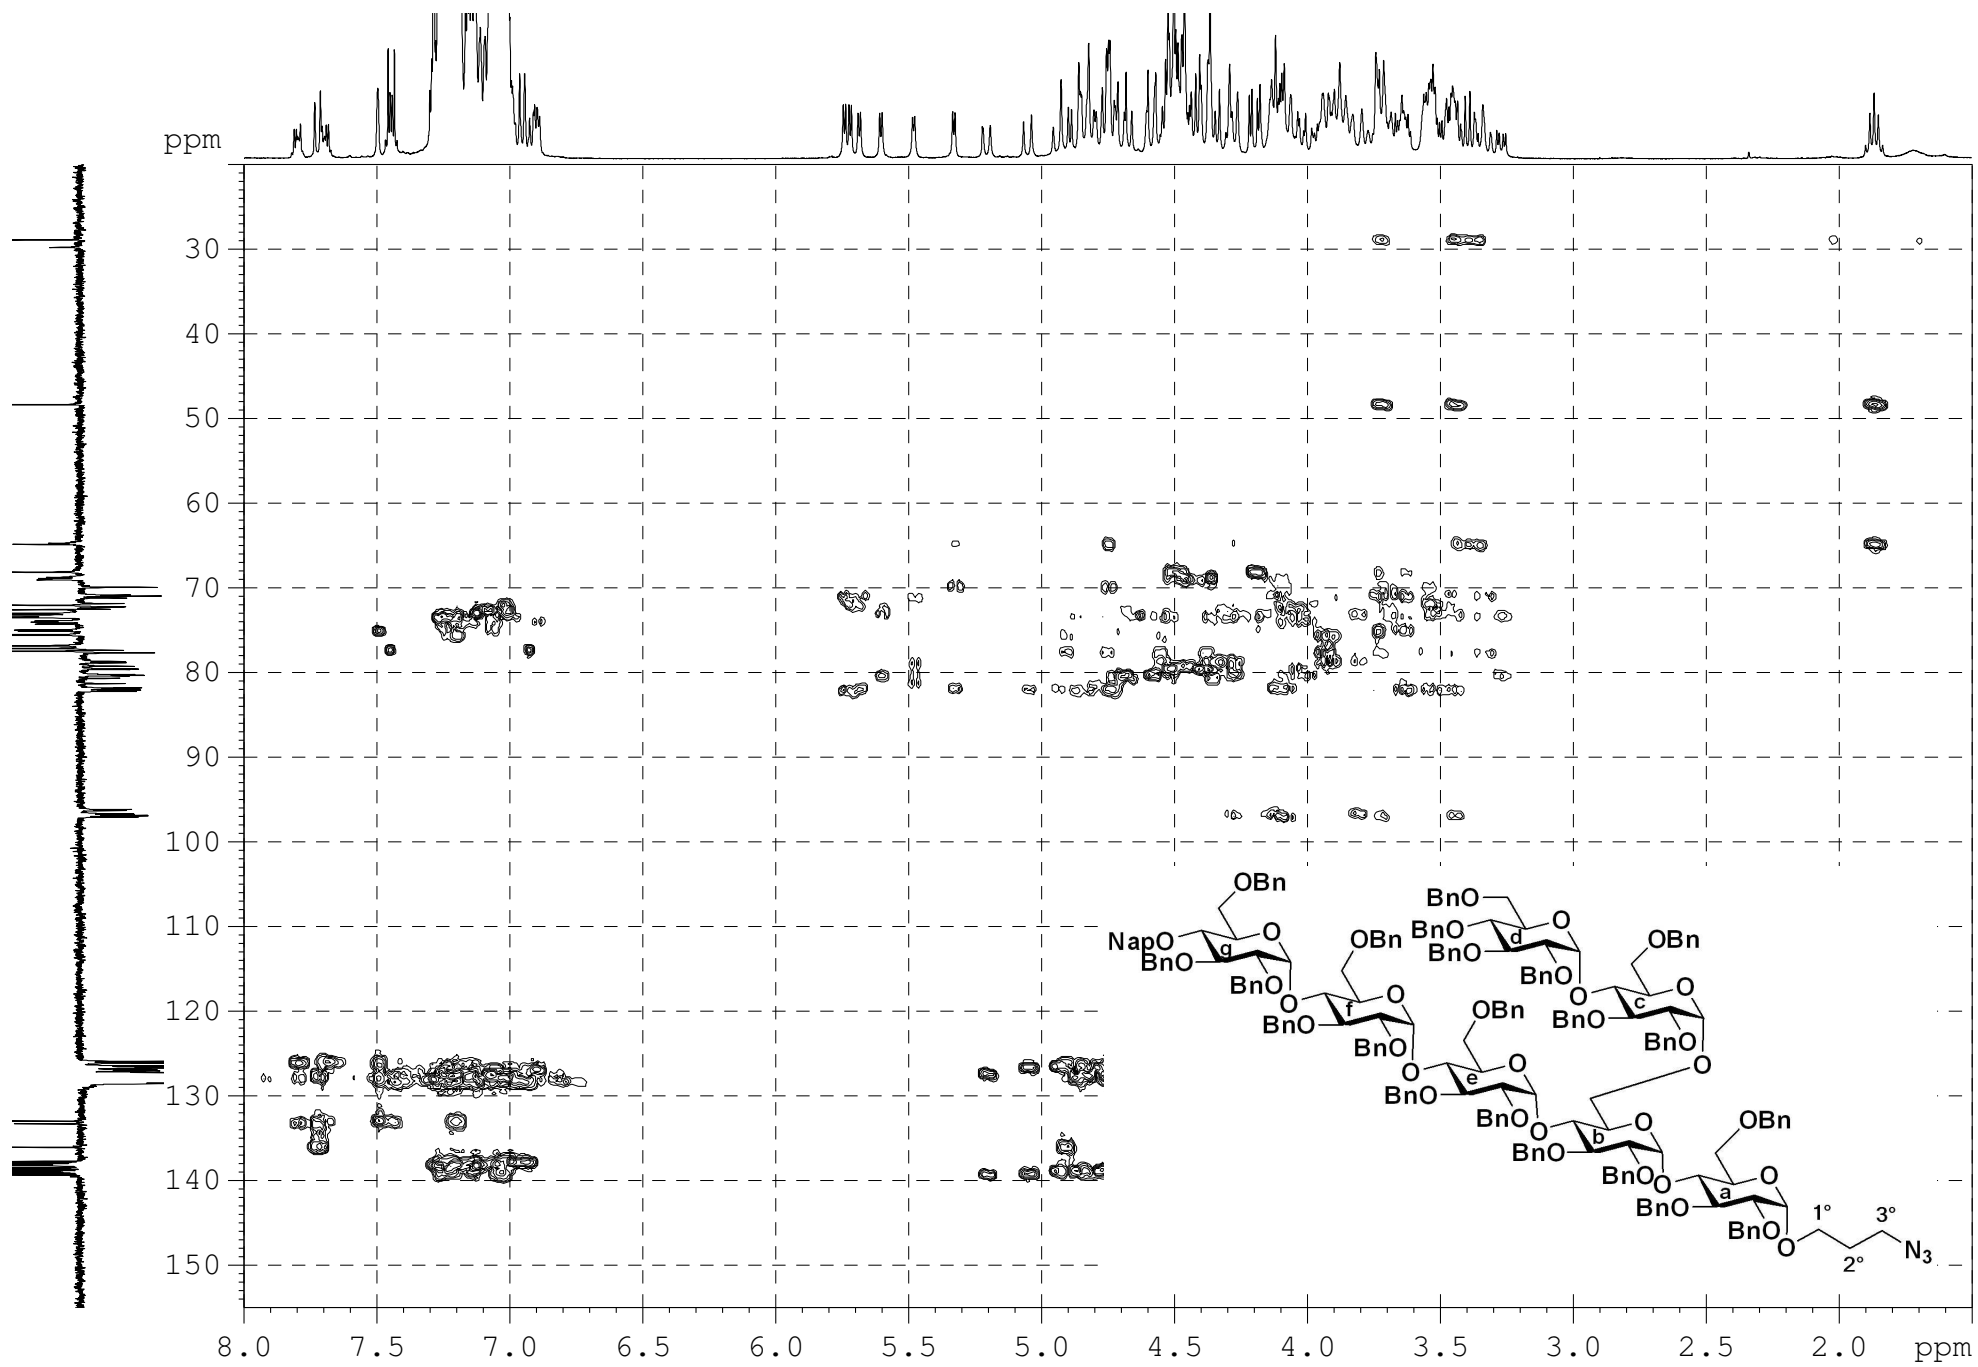





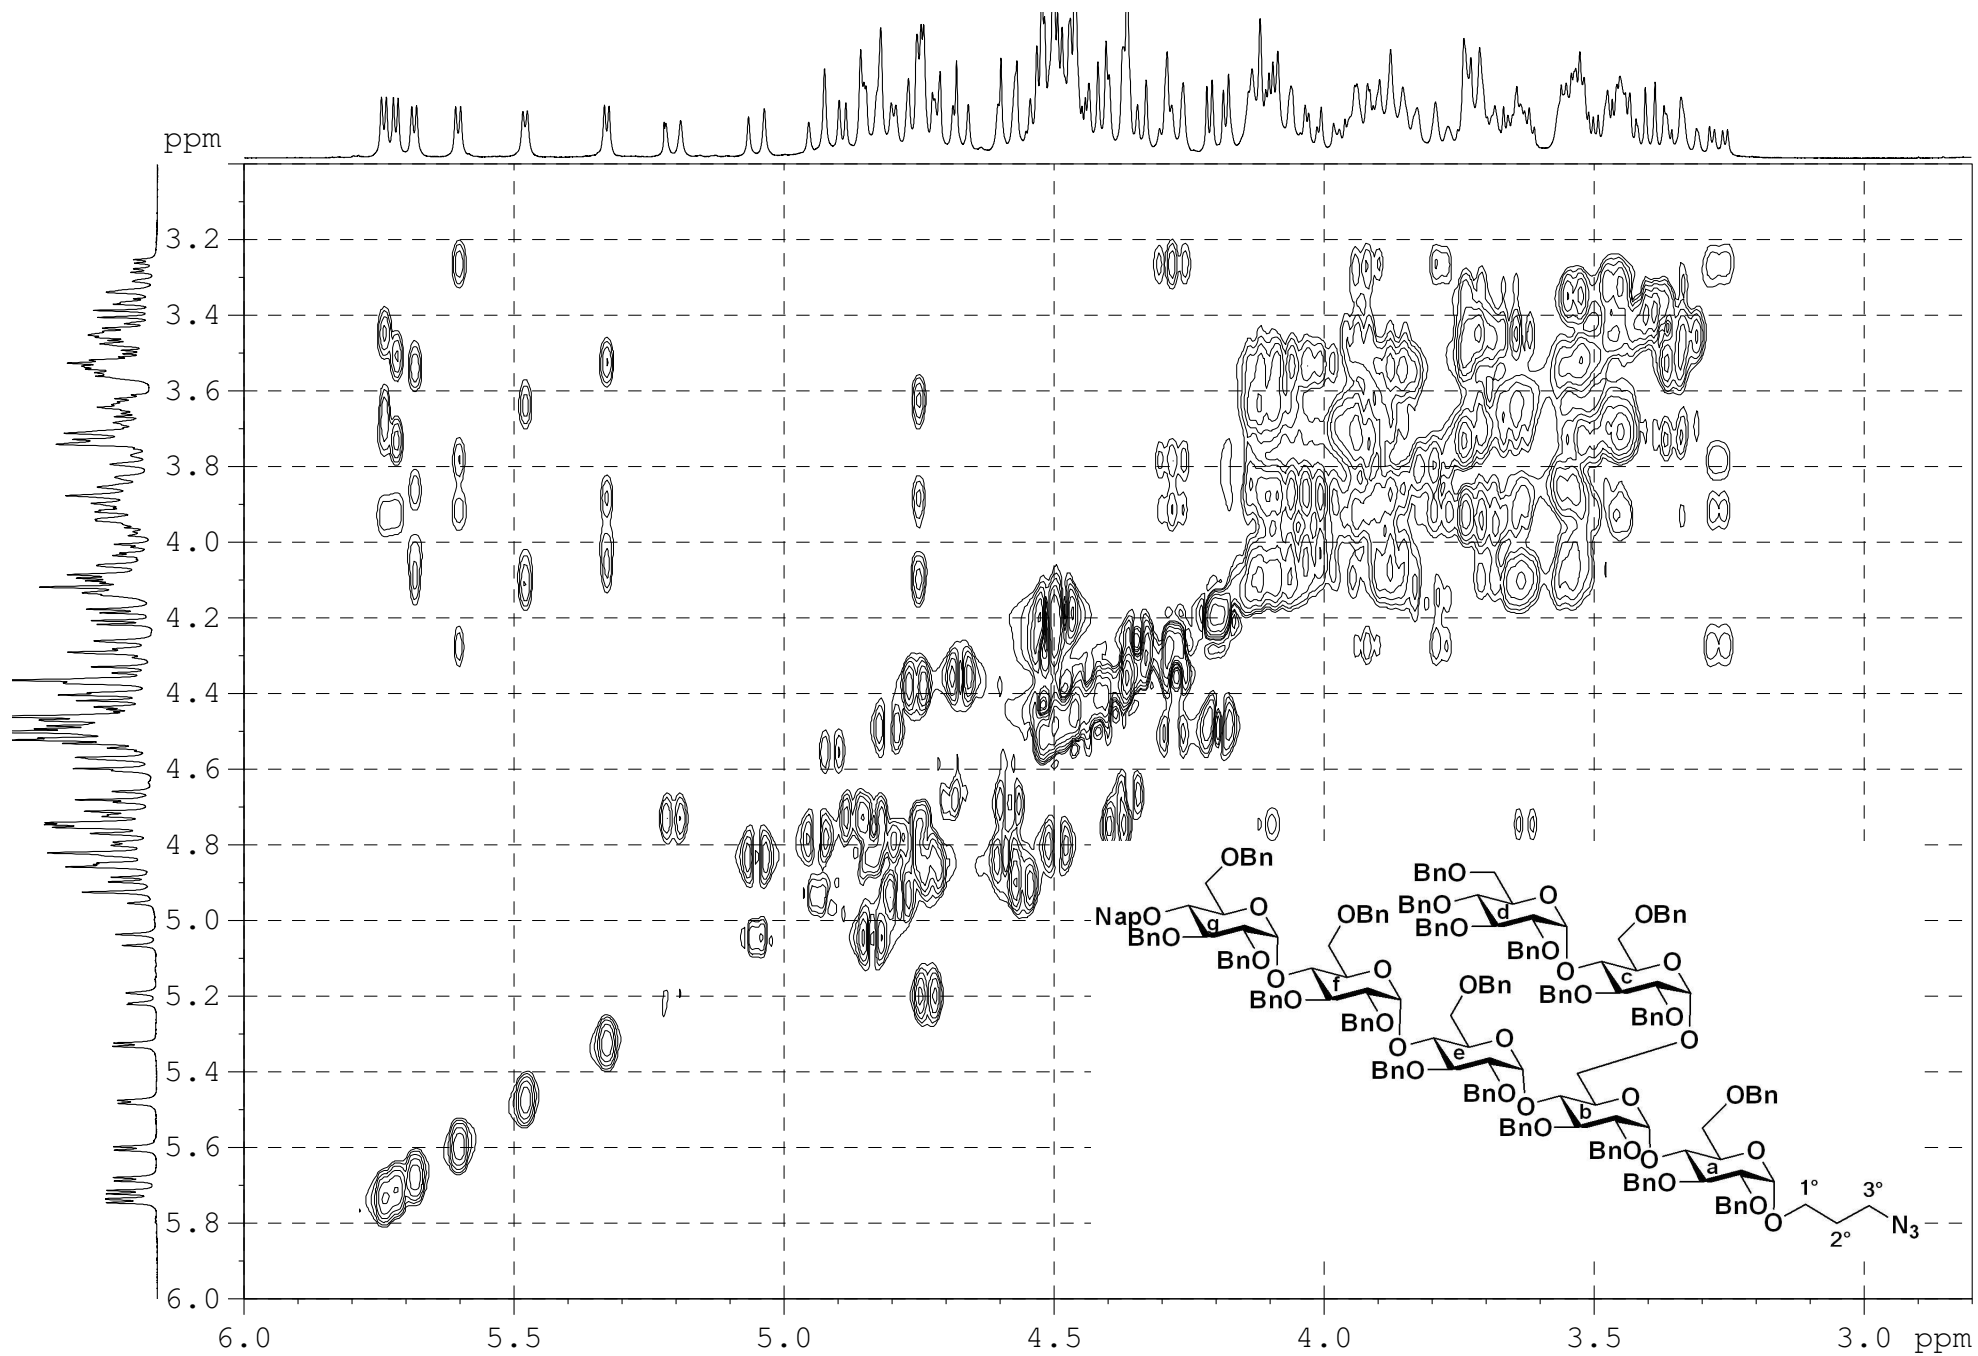

<sup>1</sup>H-NMR, <sup>13</sup>C-APT, <sup>1</sup>H-<sup>1</sup>H COSY, HSQC, <sup>1</sup>H-<sup>1</sup>H cleantocsy 41

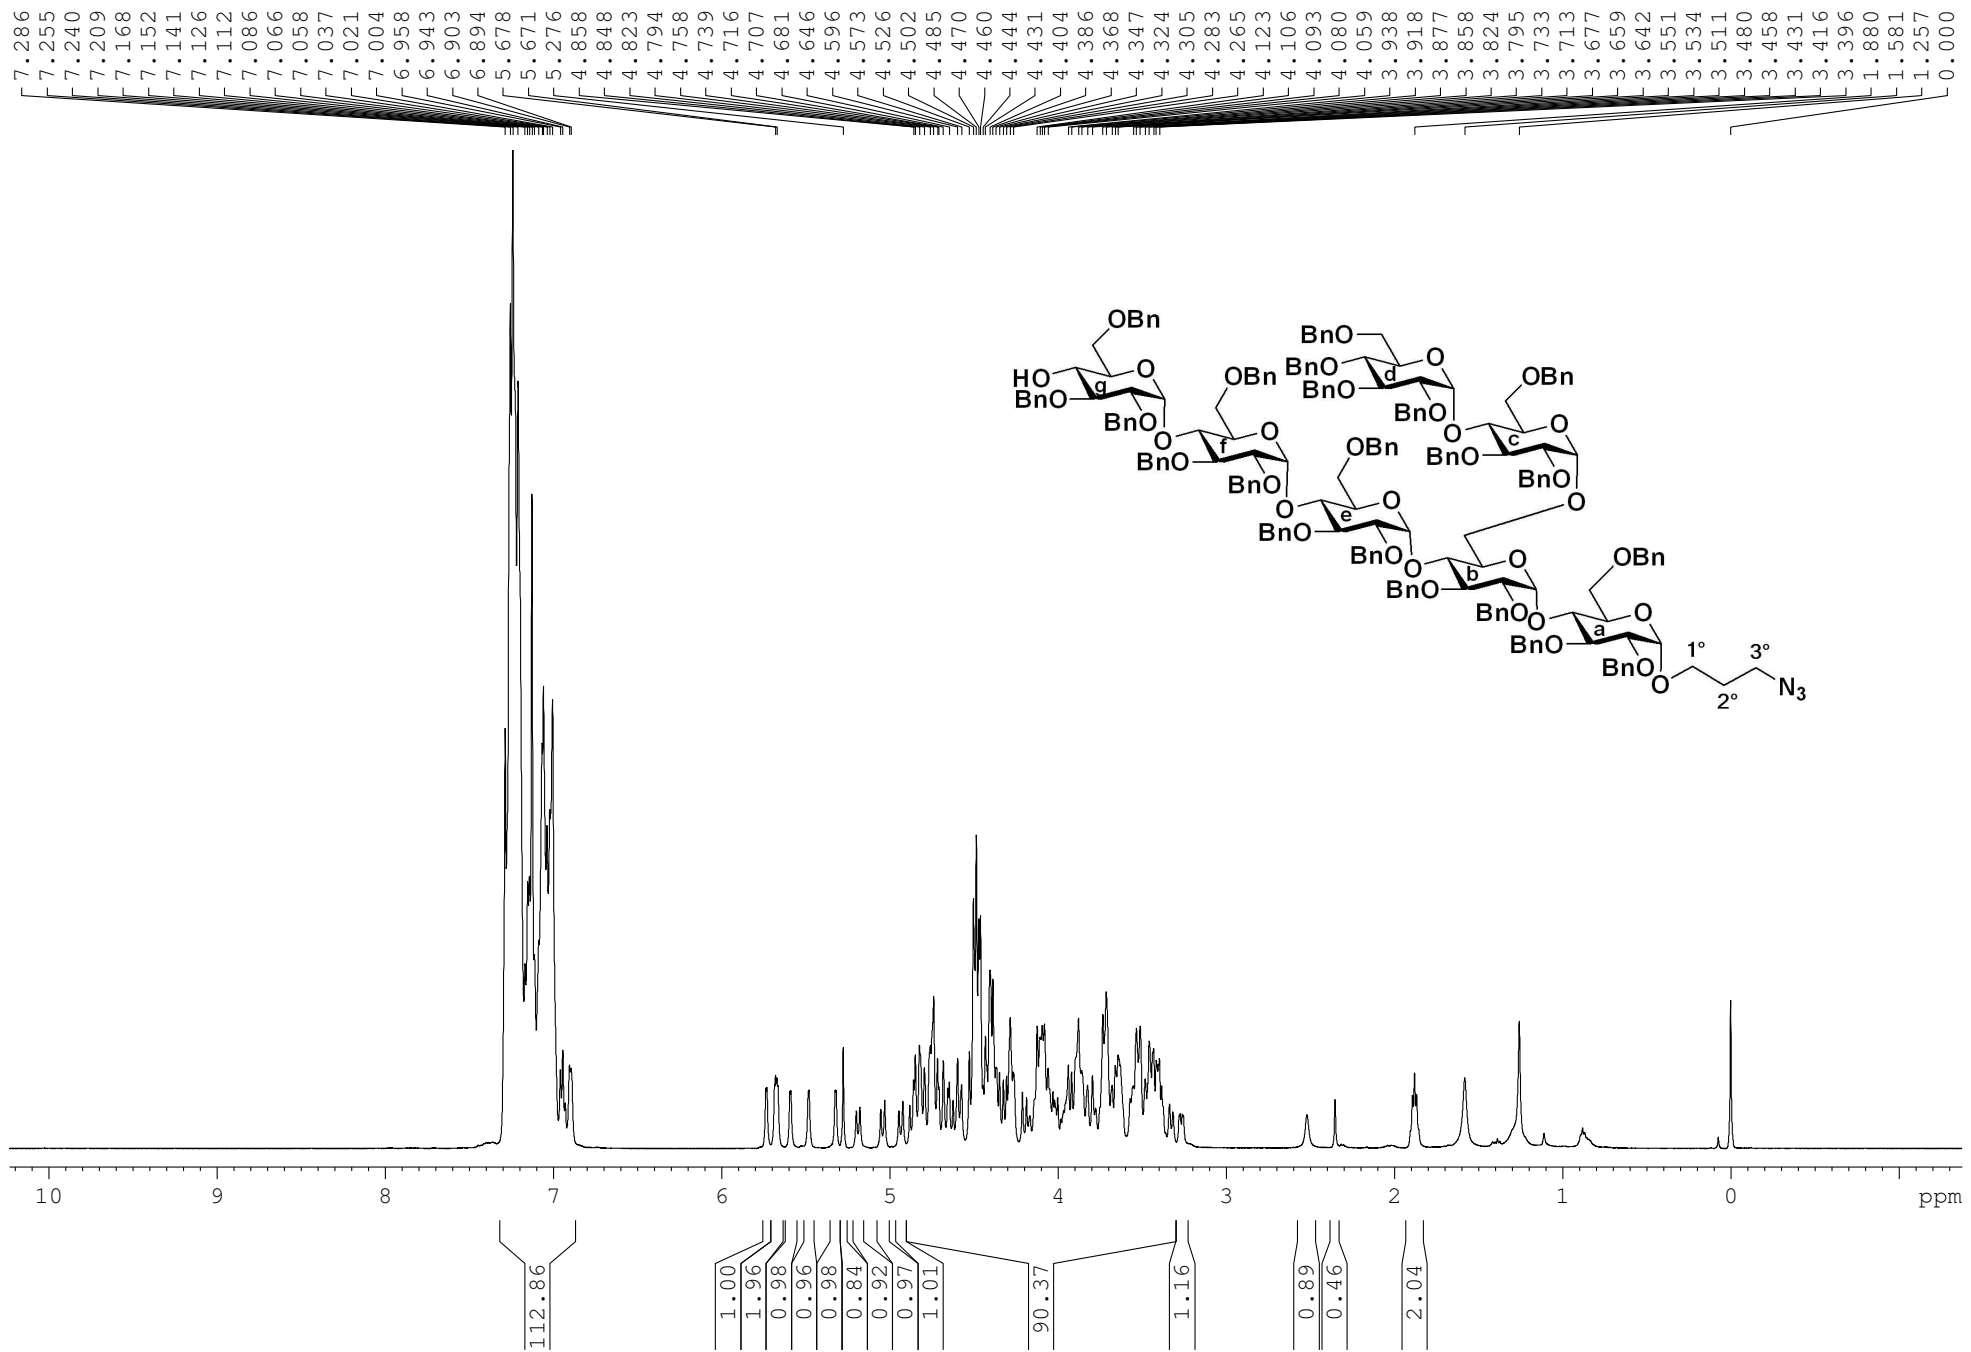

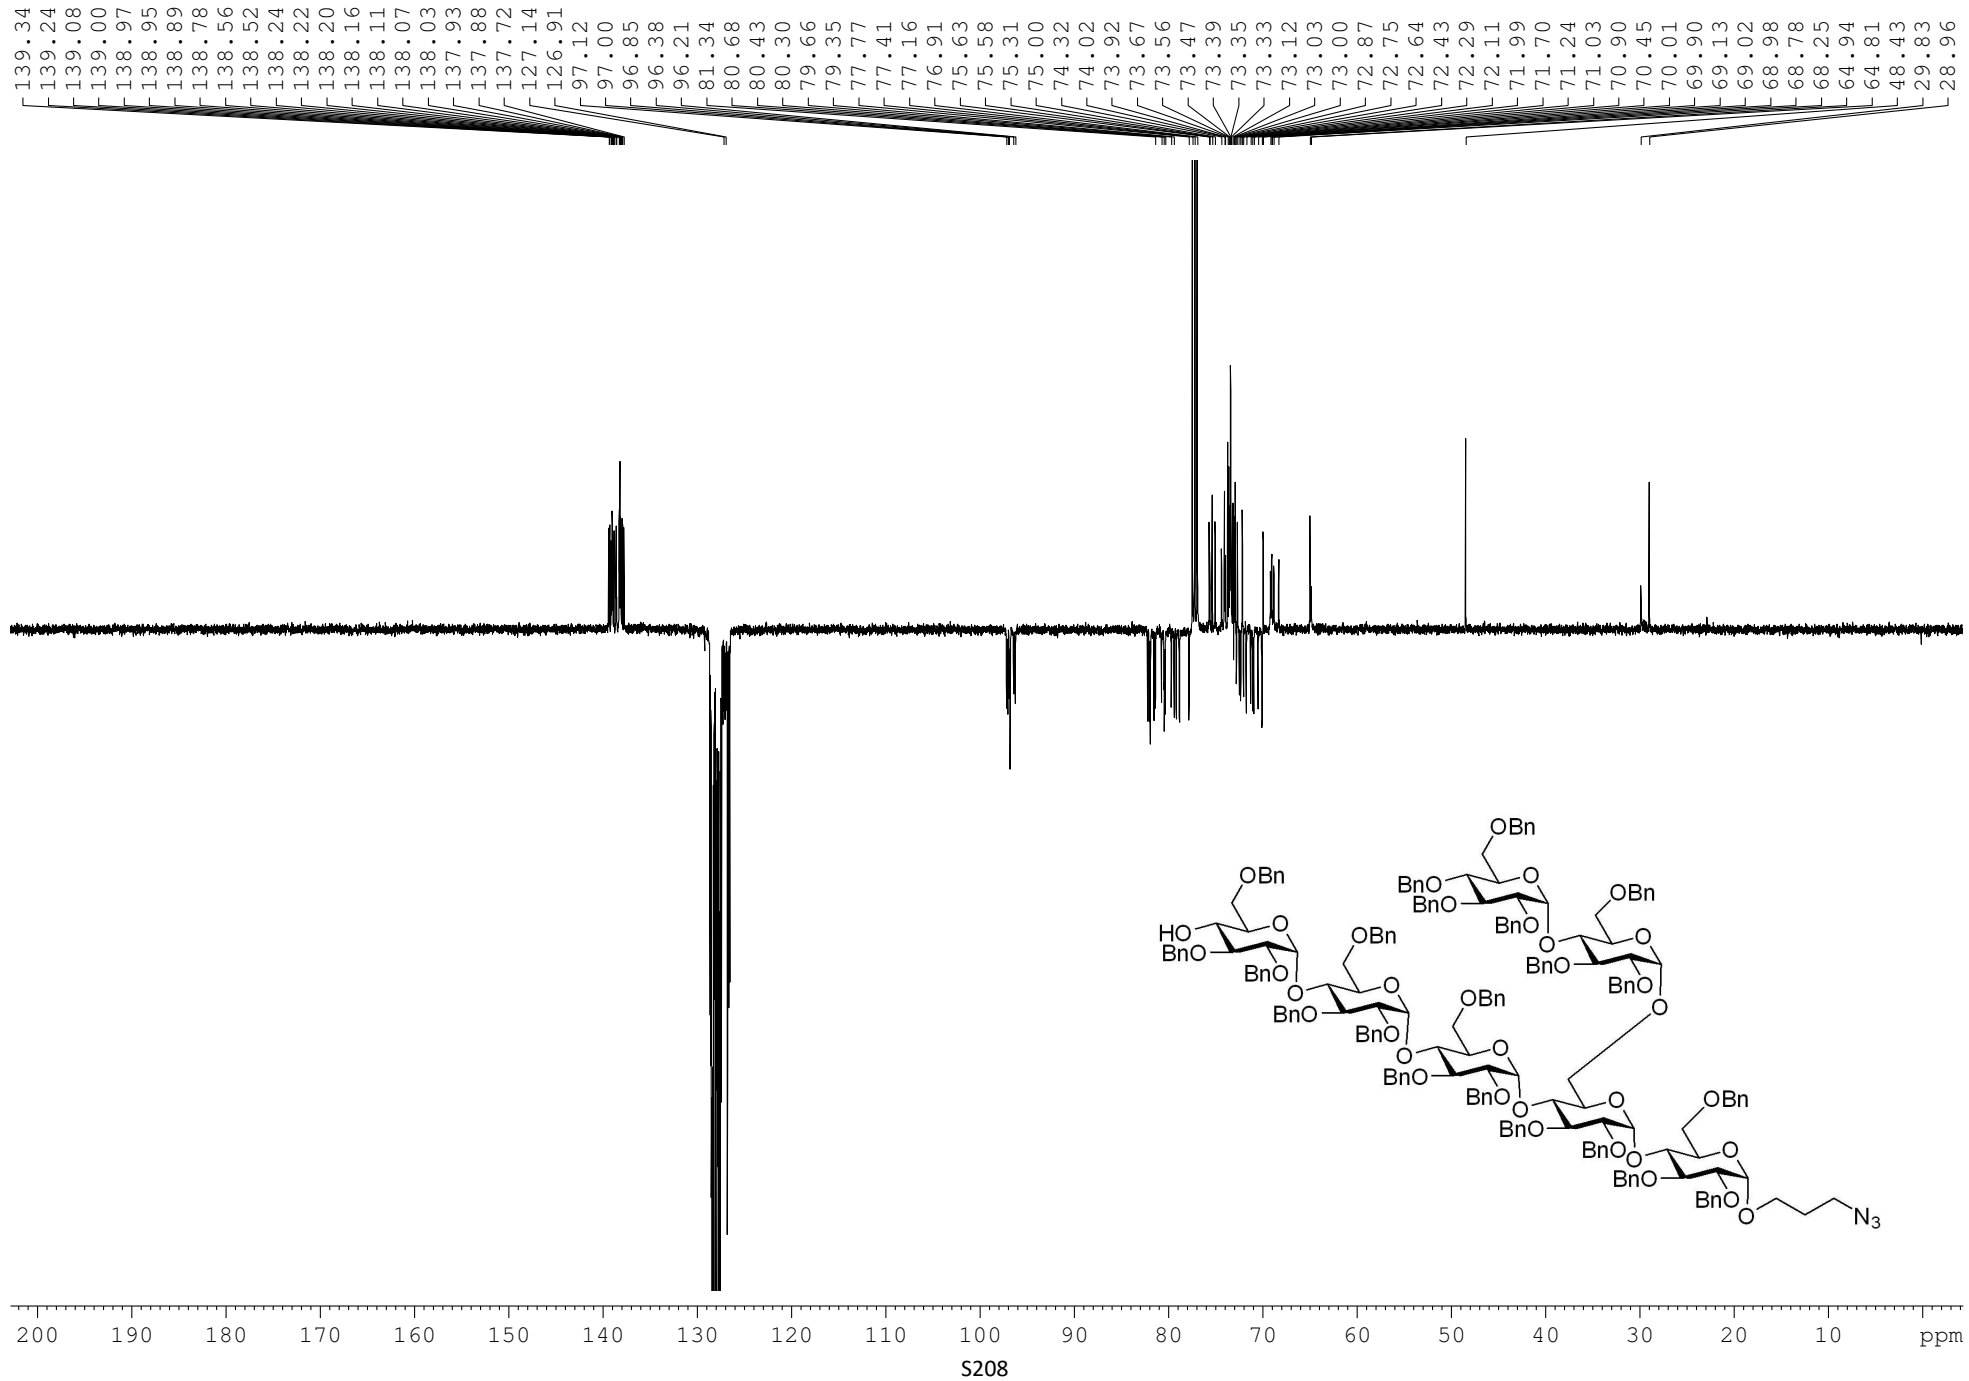

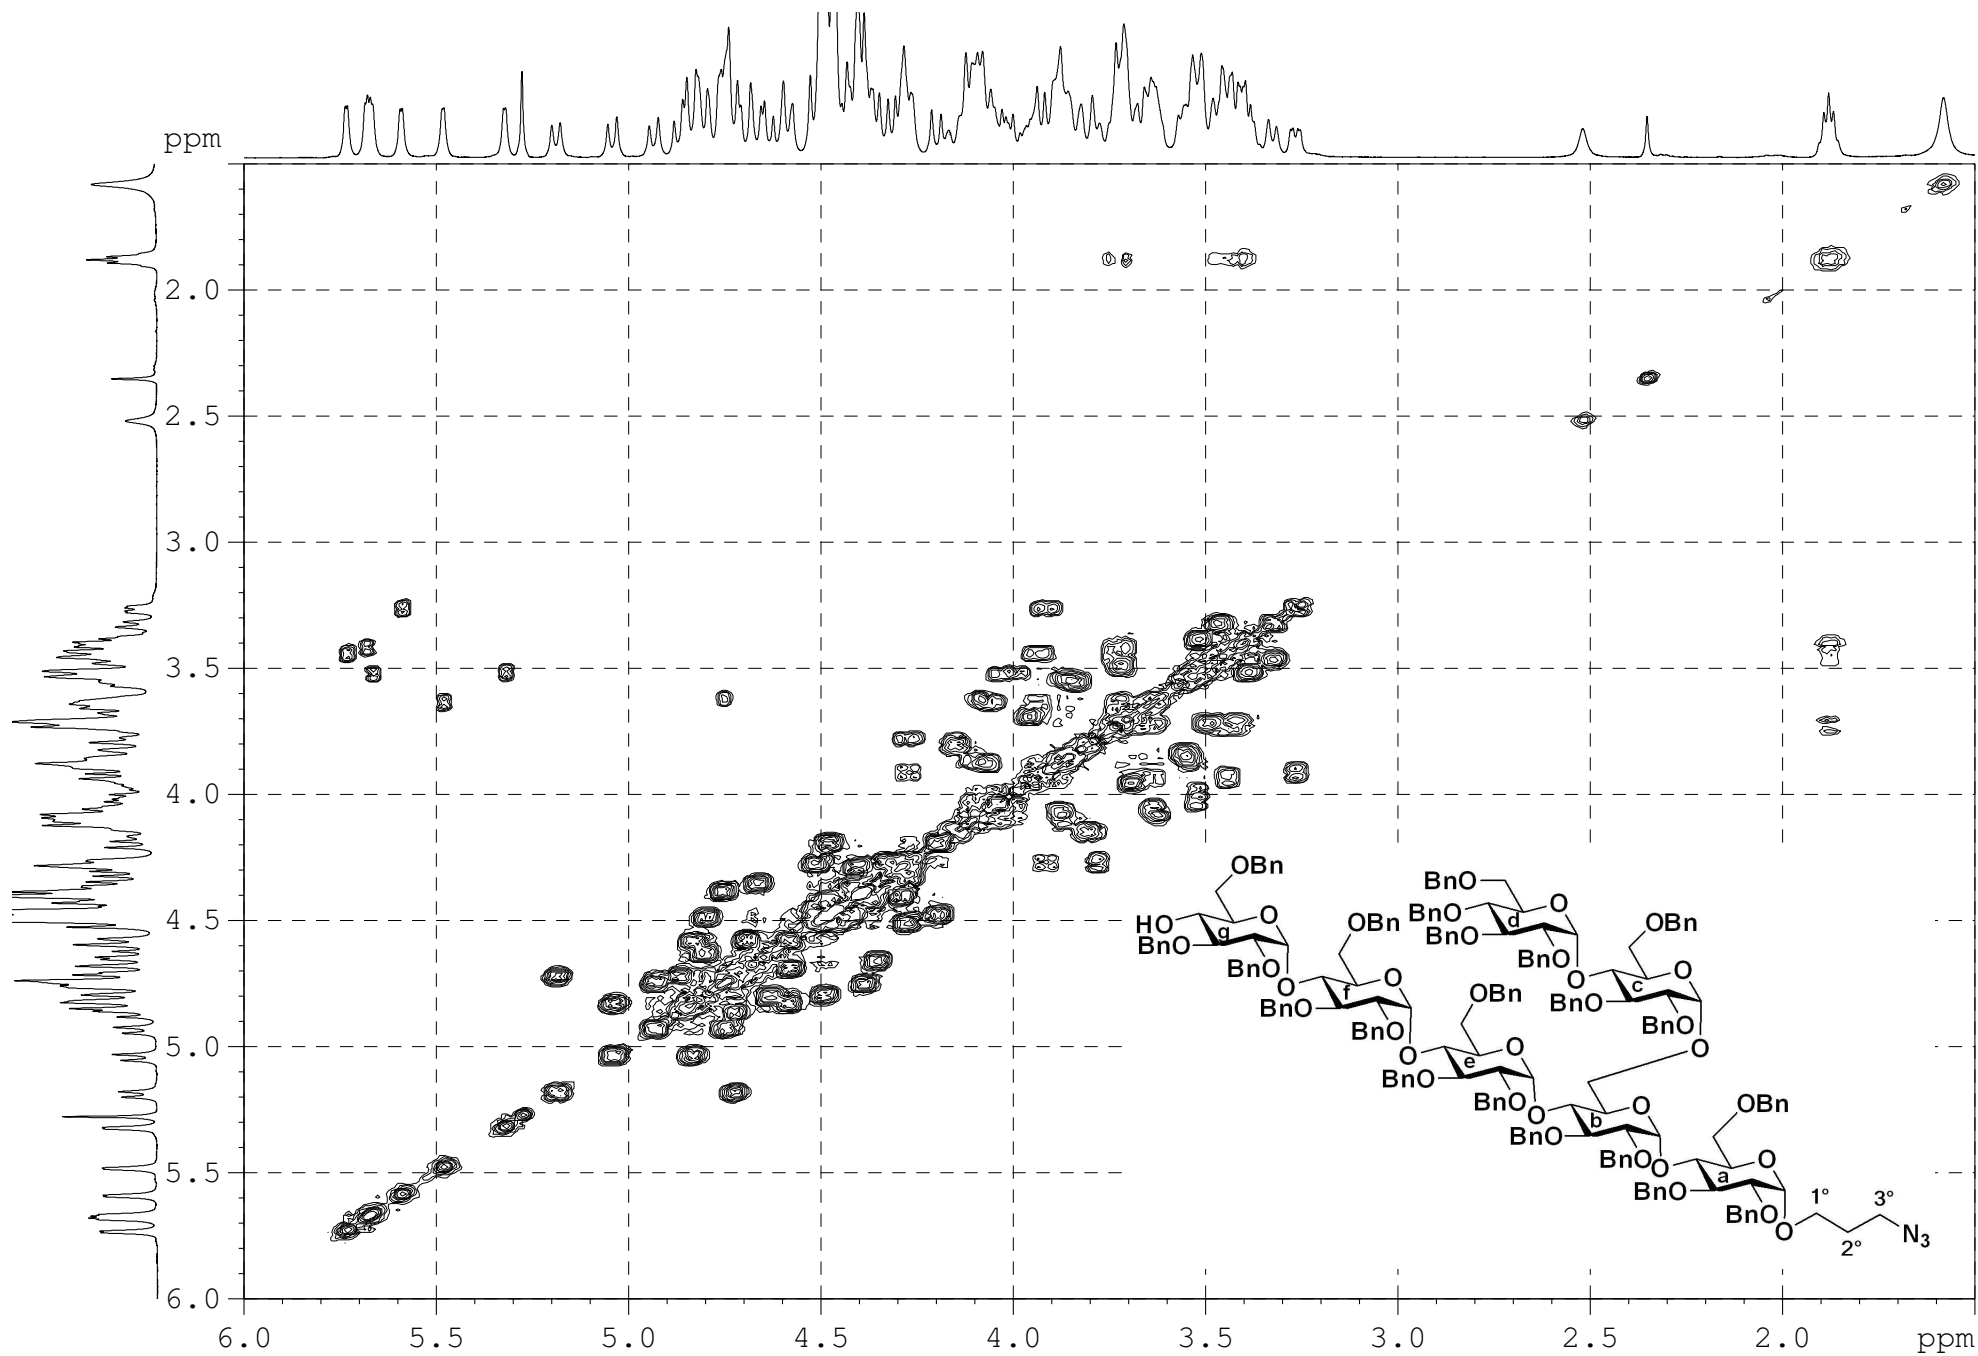

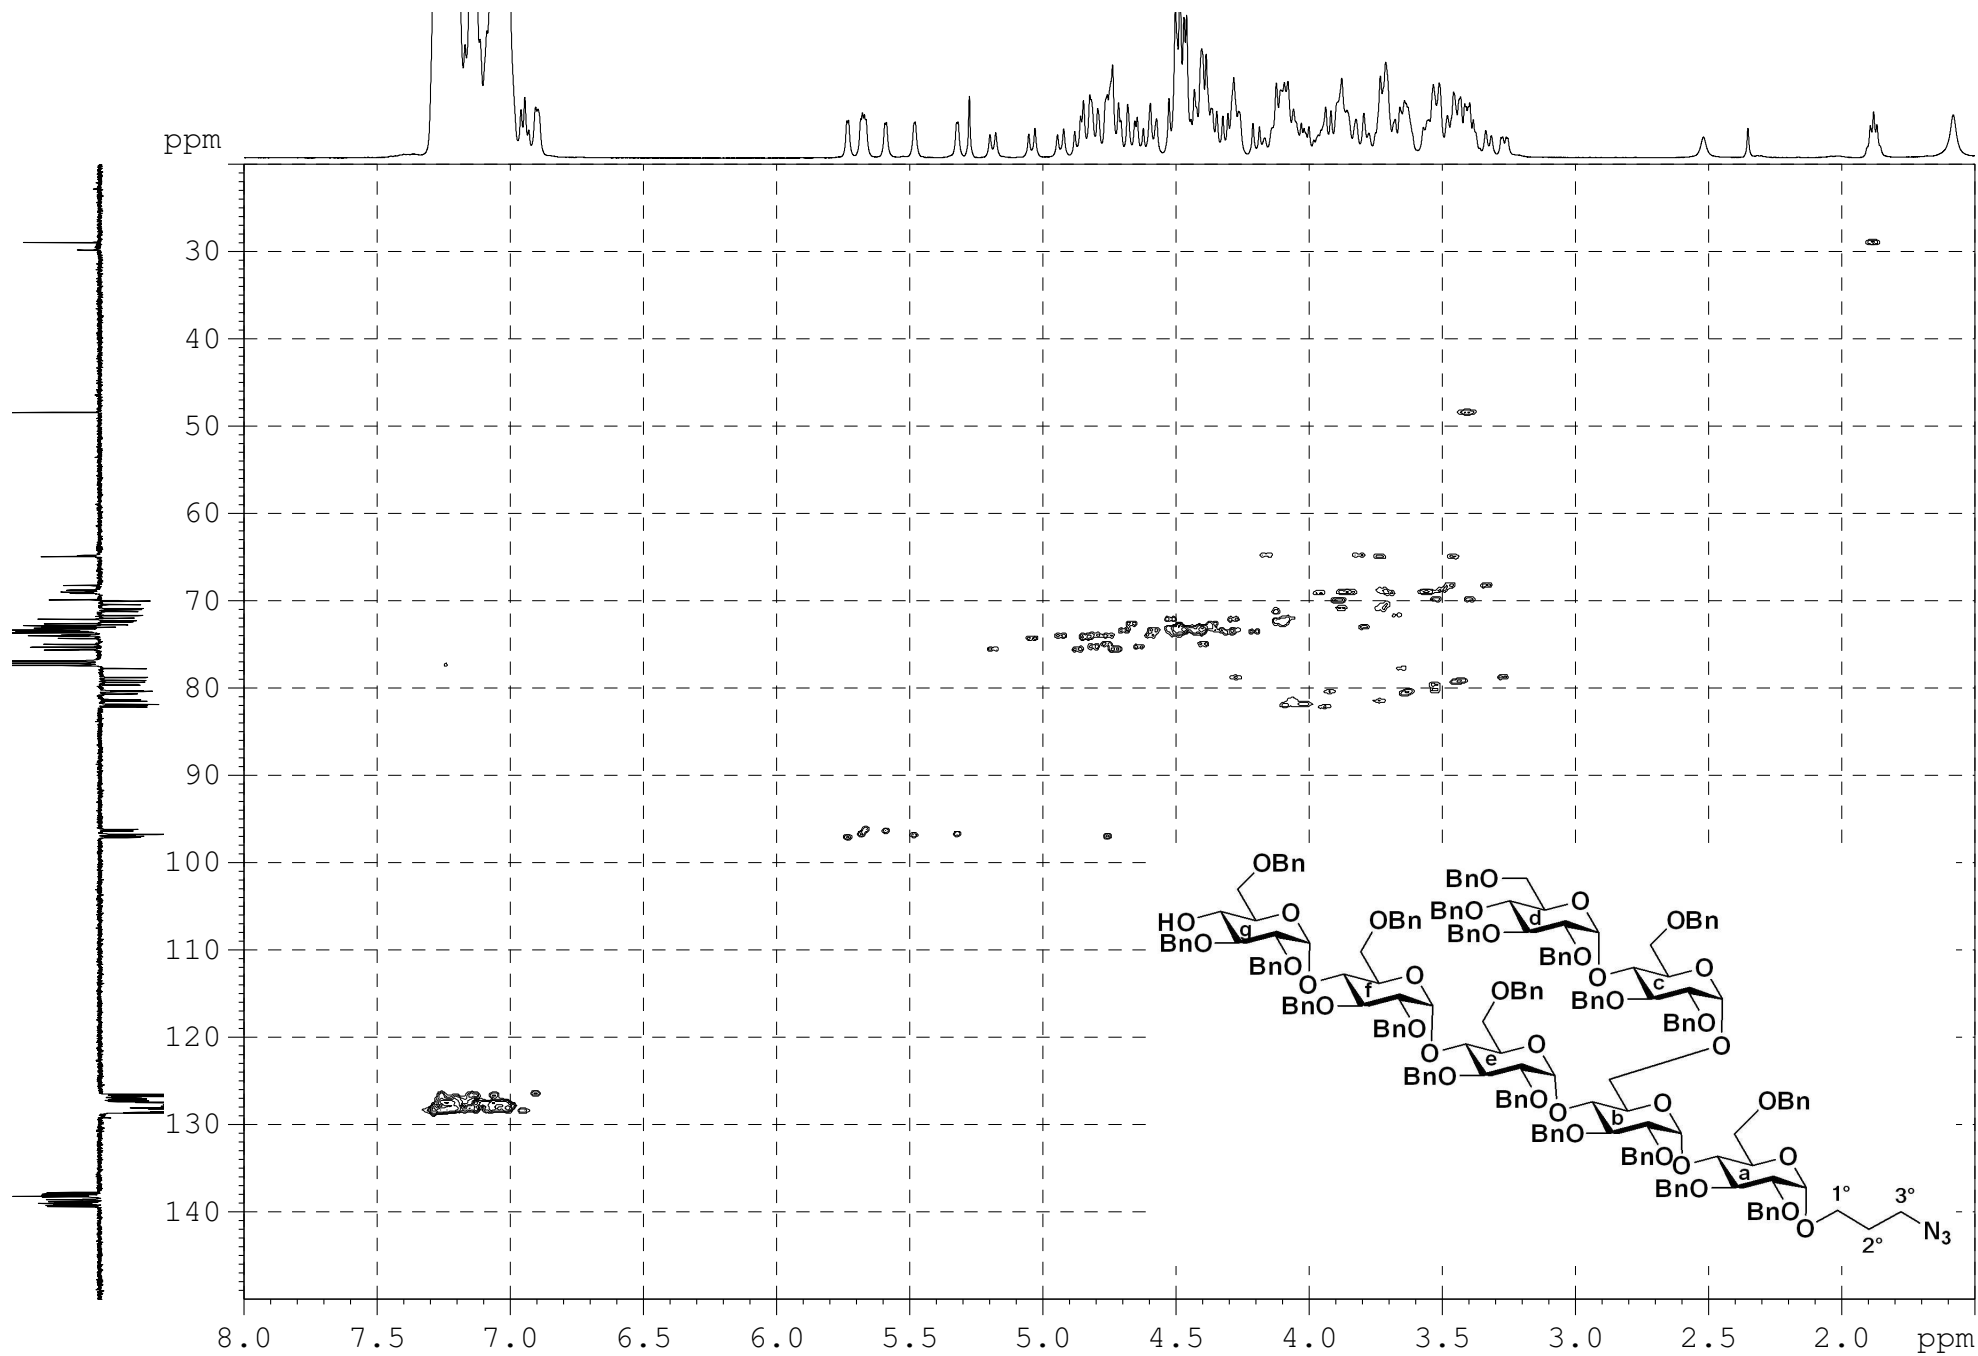

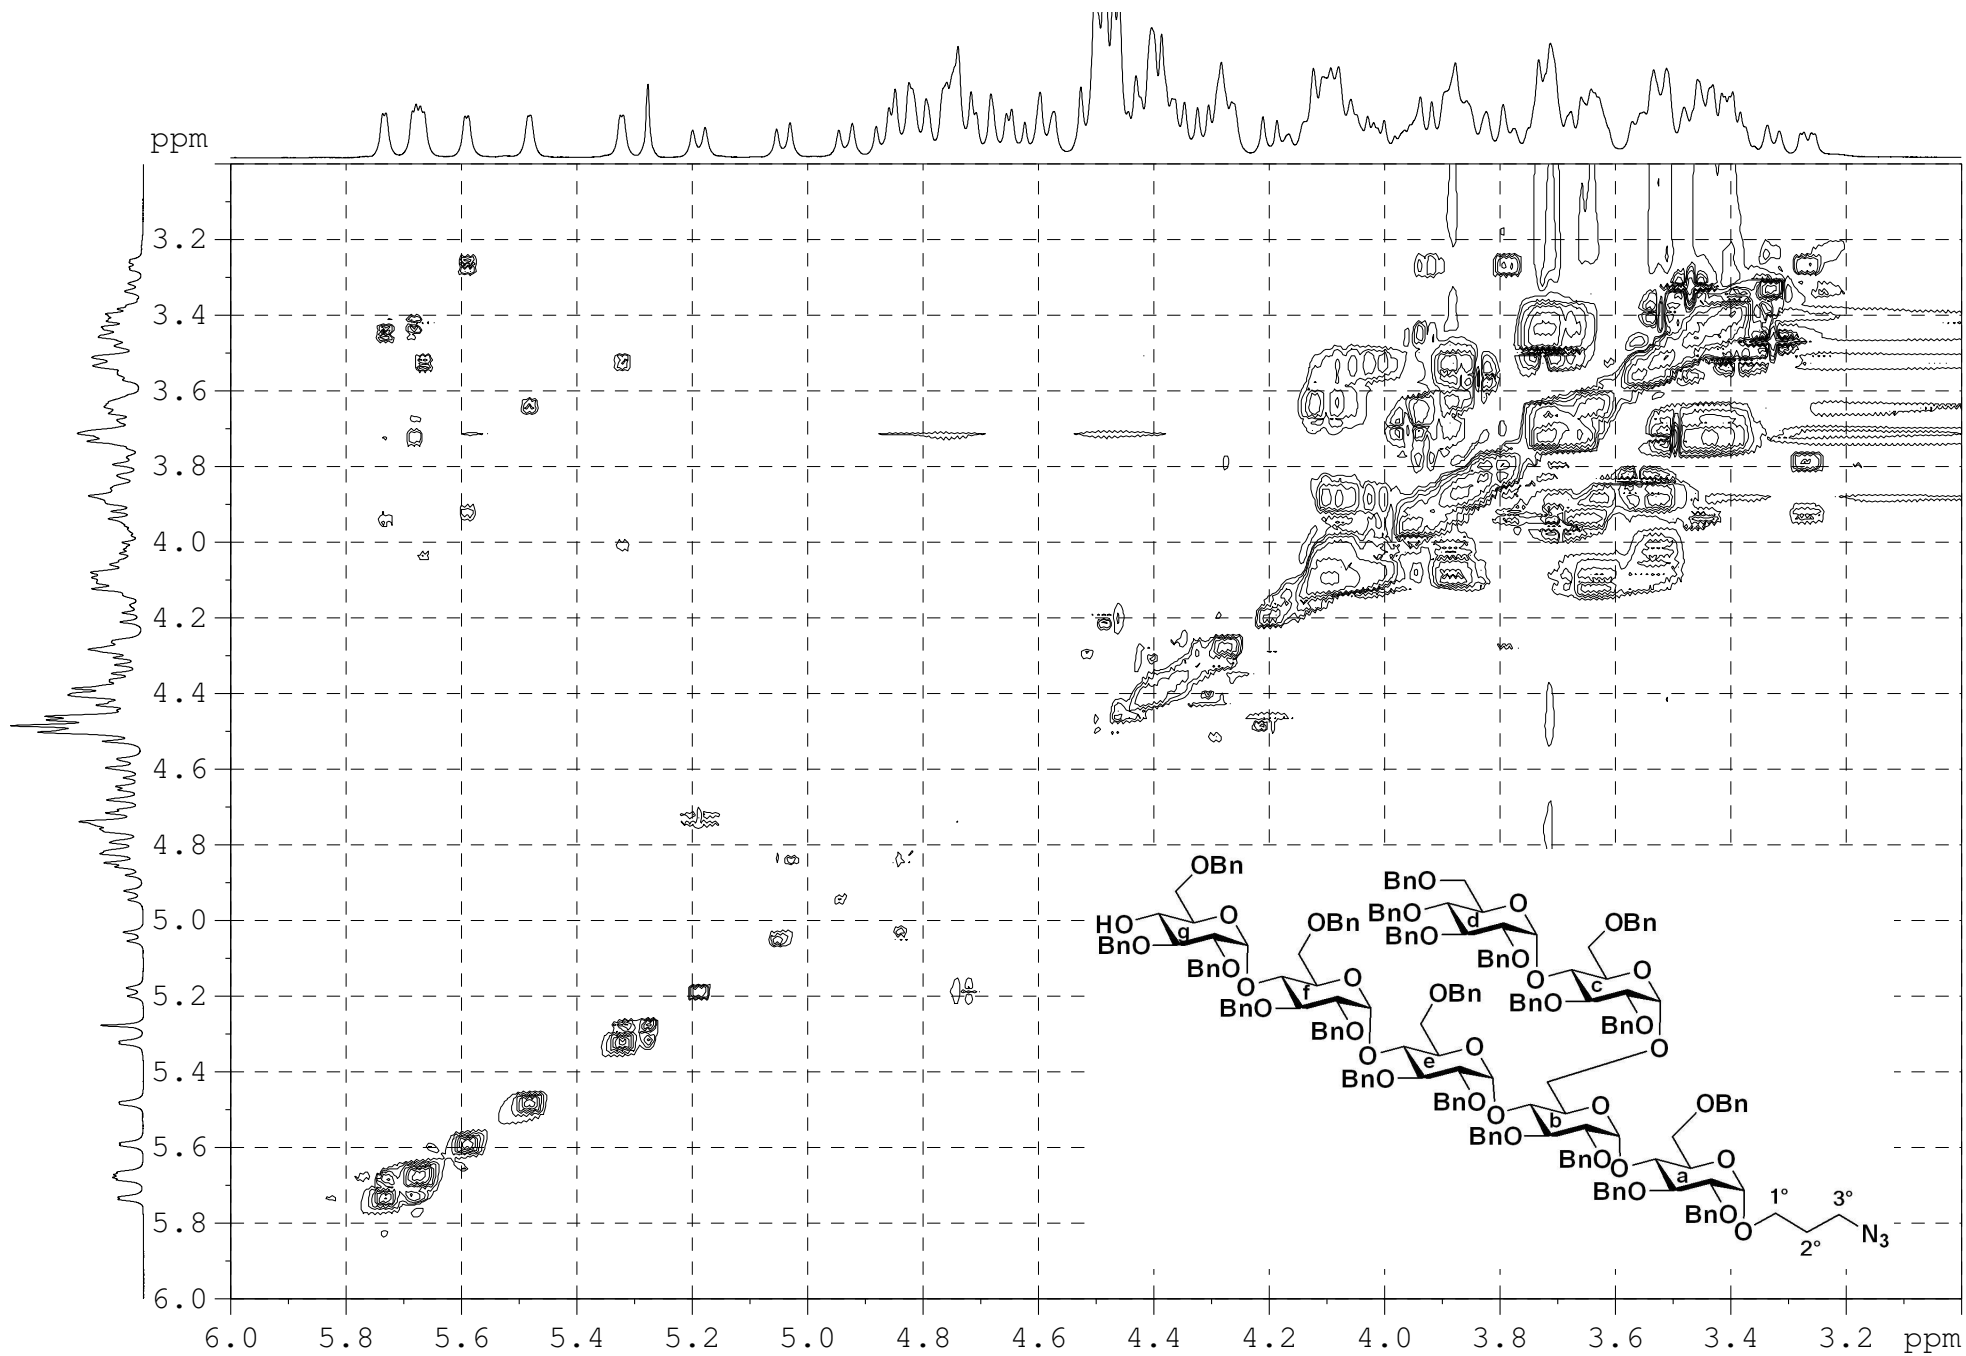

<sup>1</sup>H-NMR, <sup>13</sup>C-APT, <sup>1</sup>H-<sup>1</sup>H COSY, HSQC 42

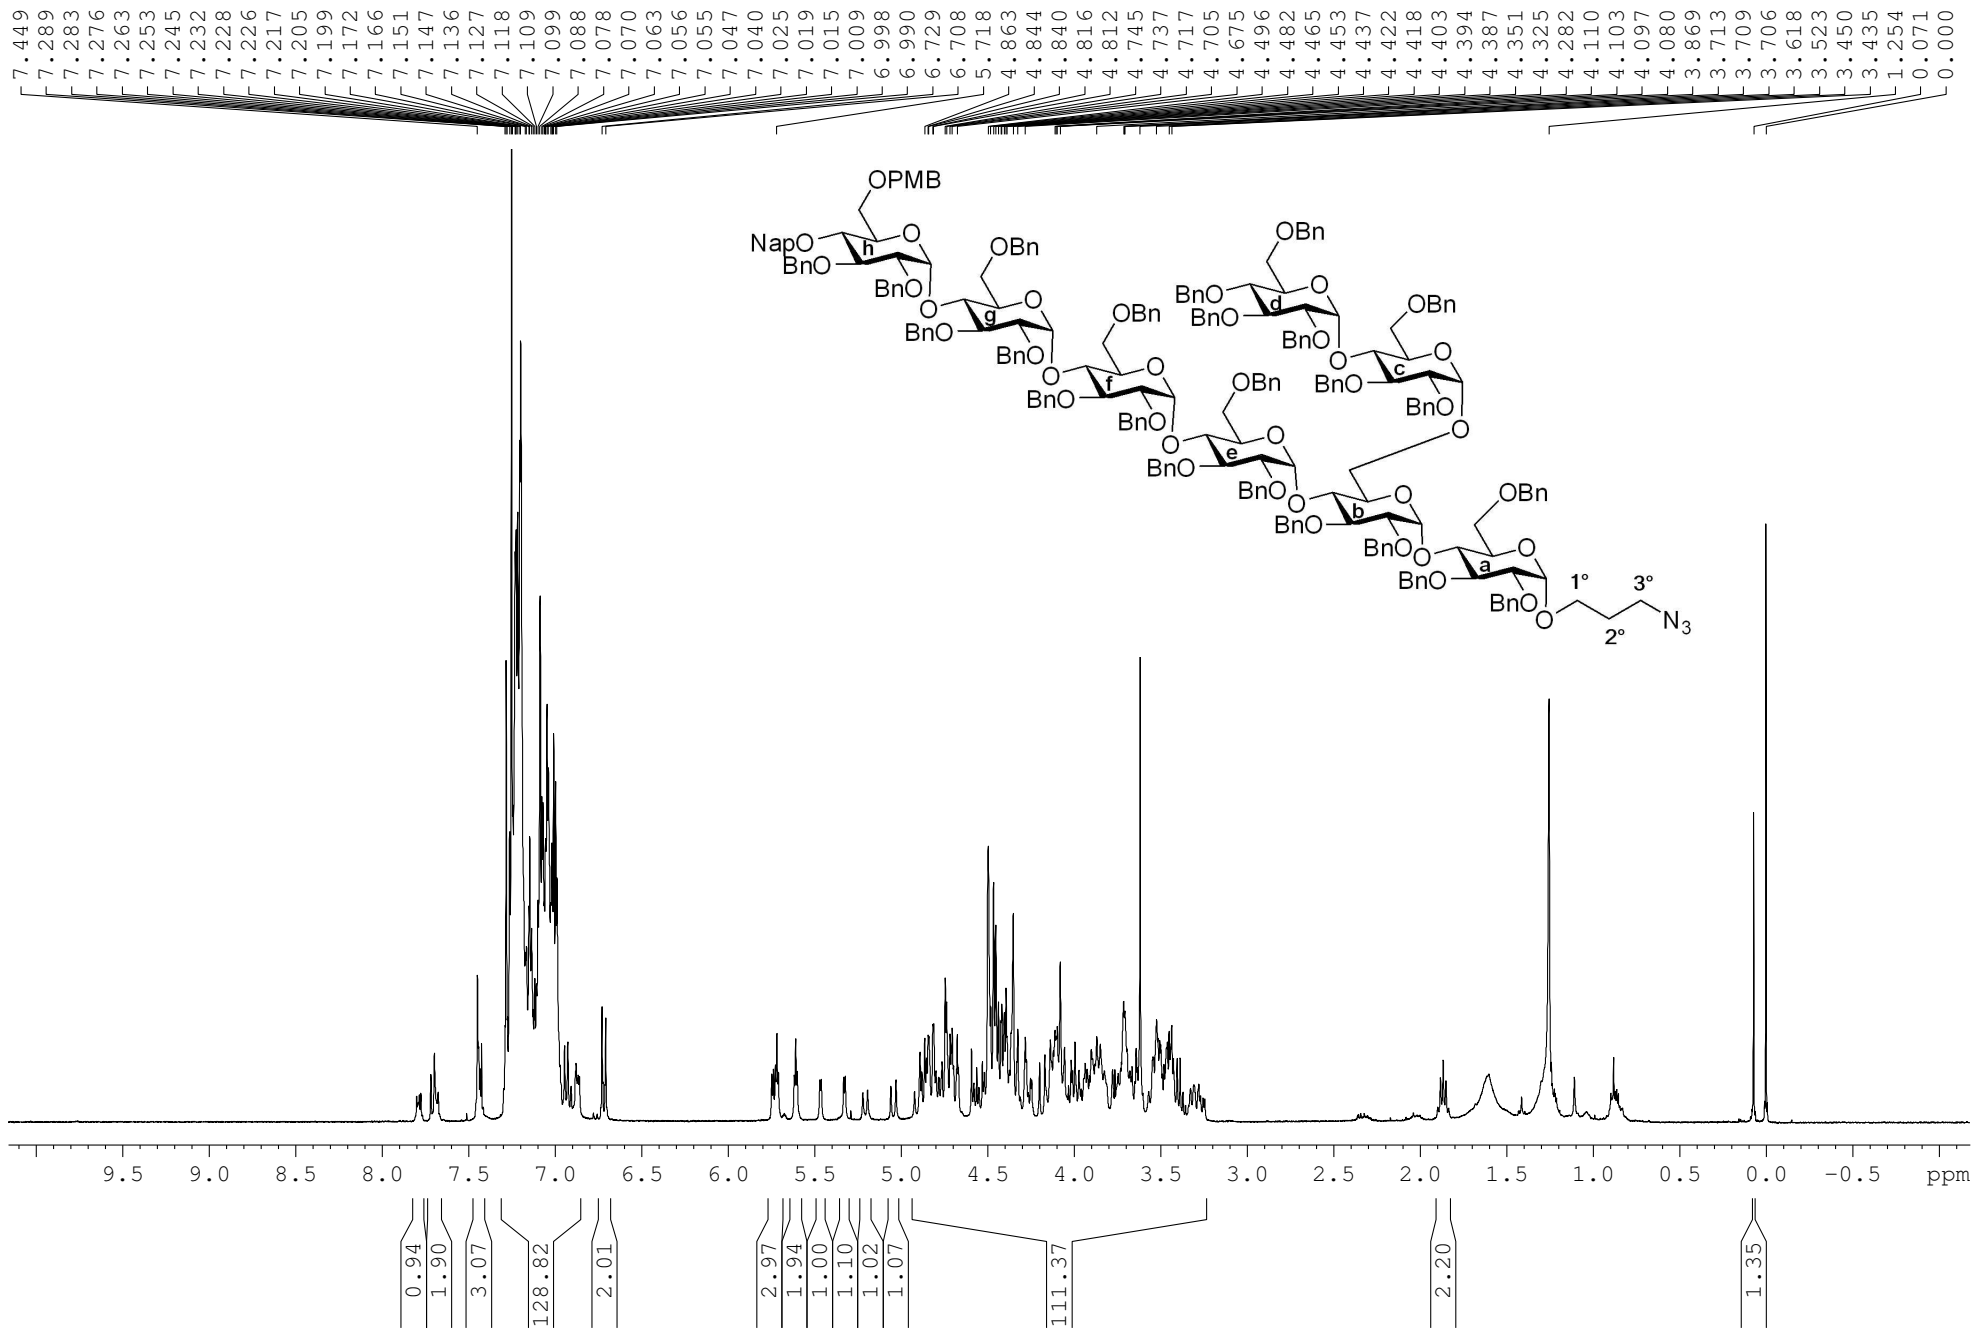



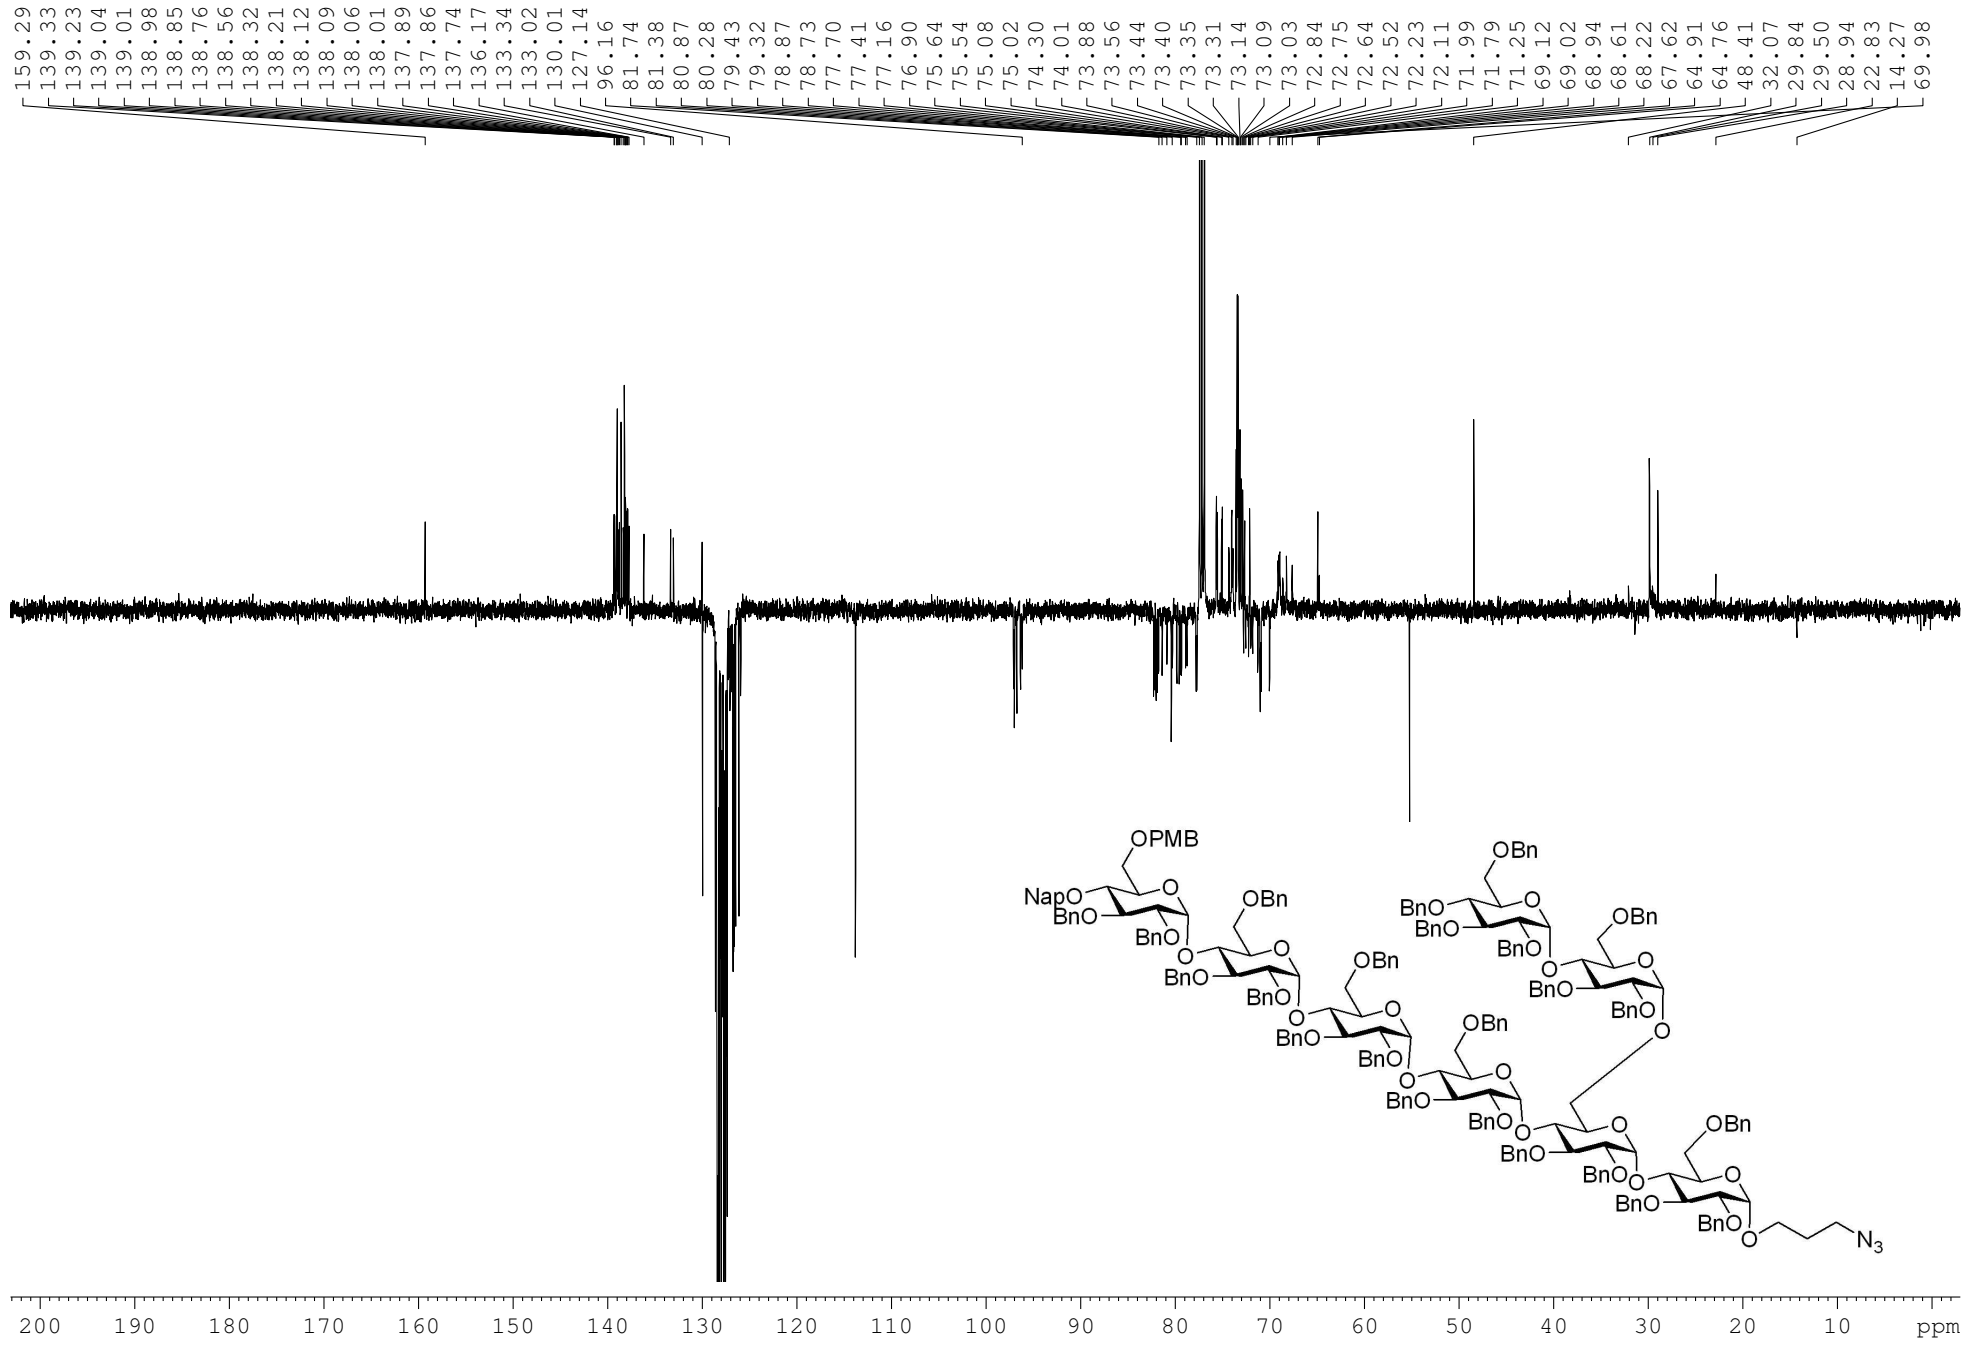



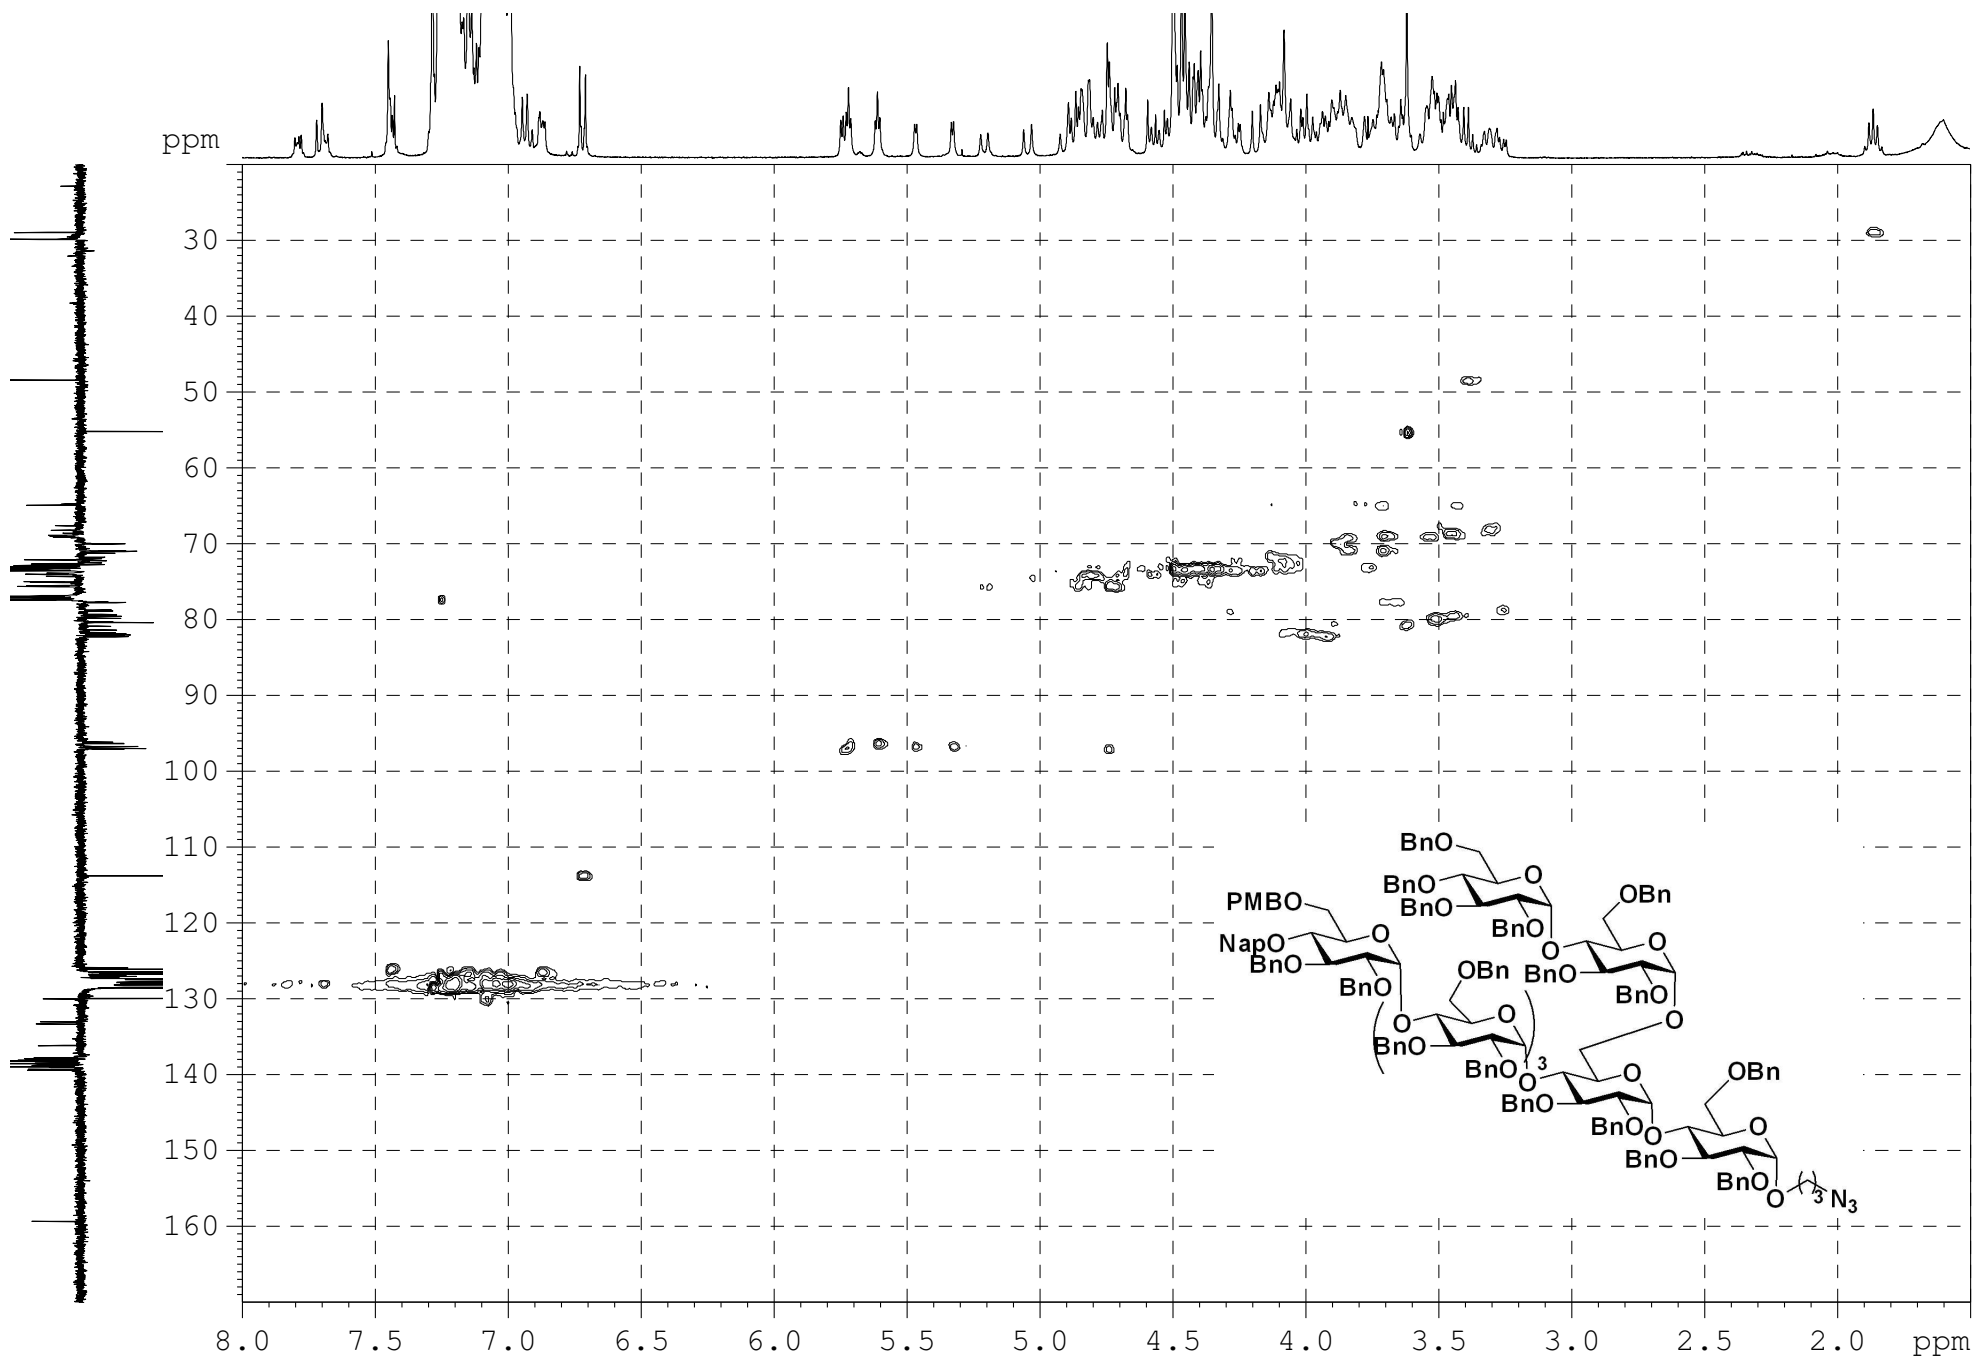

<sup>1</sup>H-NMR, <sup>13</sup>C-APT, <sup>1</sup>H-<sup>1</sup>H COSY, HSQC, HMBC, GATED, <sup>1</sup>H-<sup>1</sup>H cleantocsy **43**

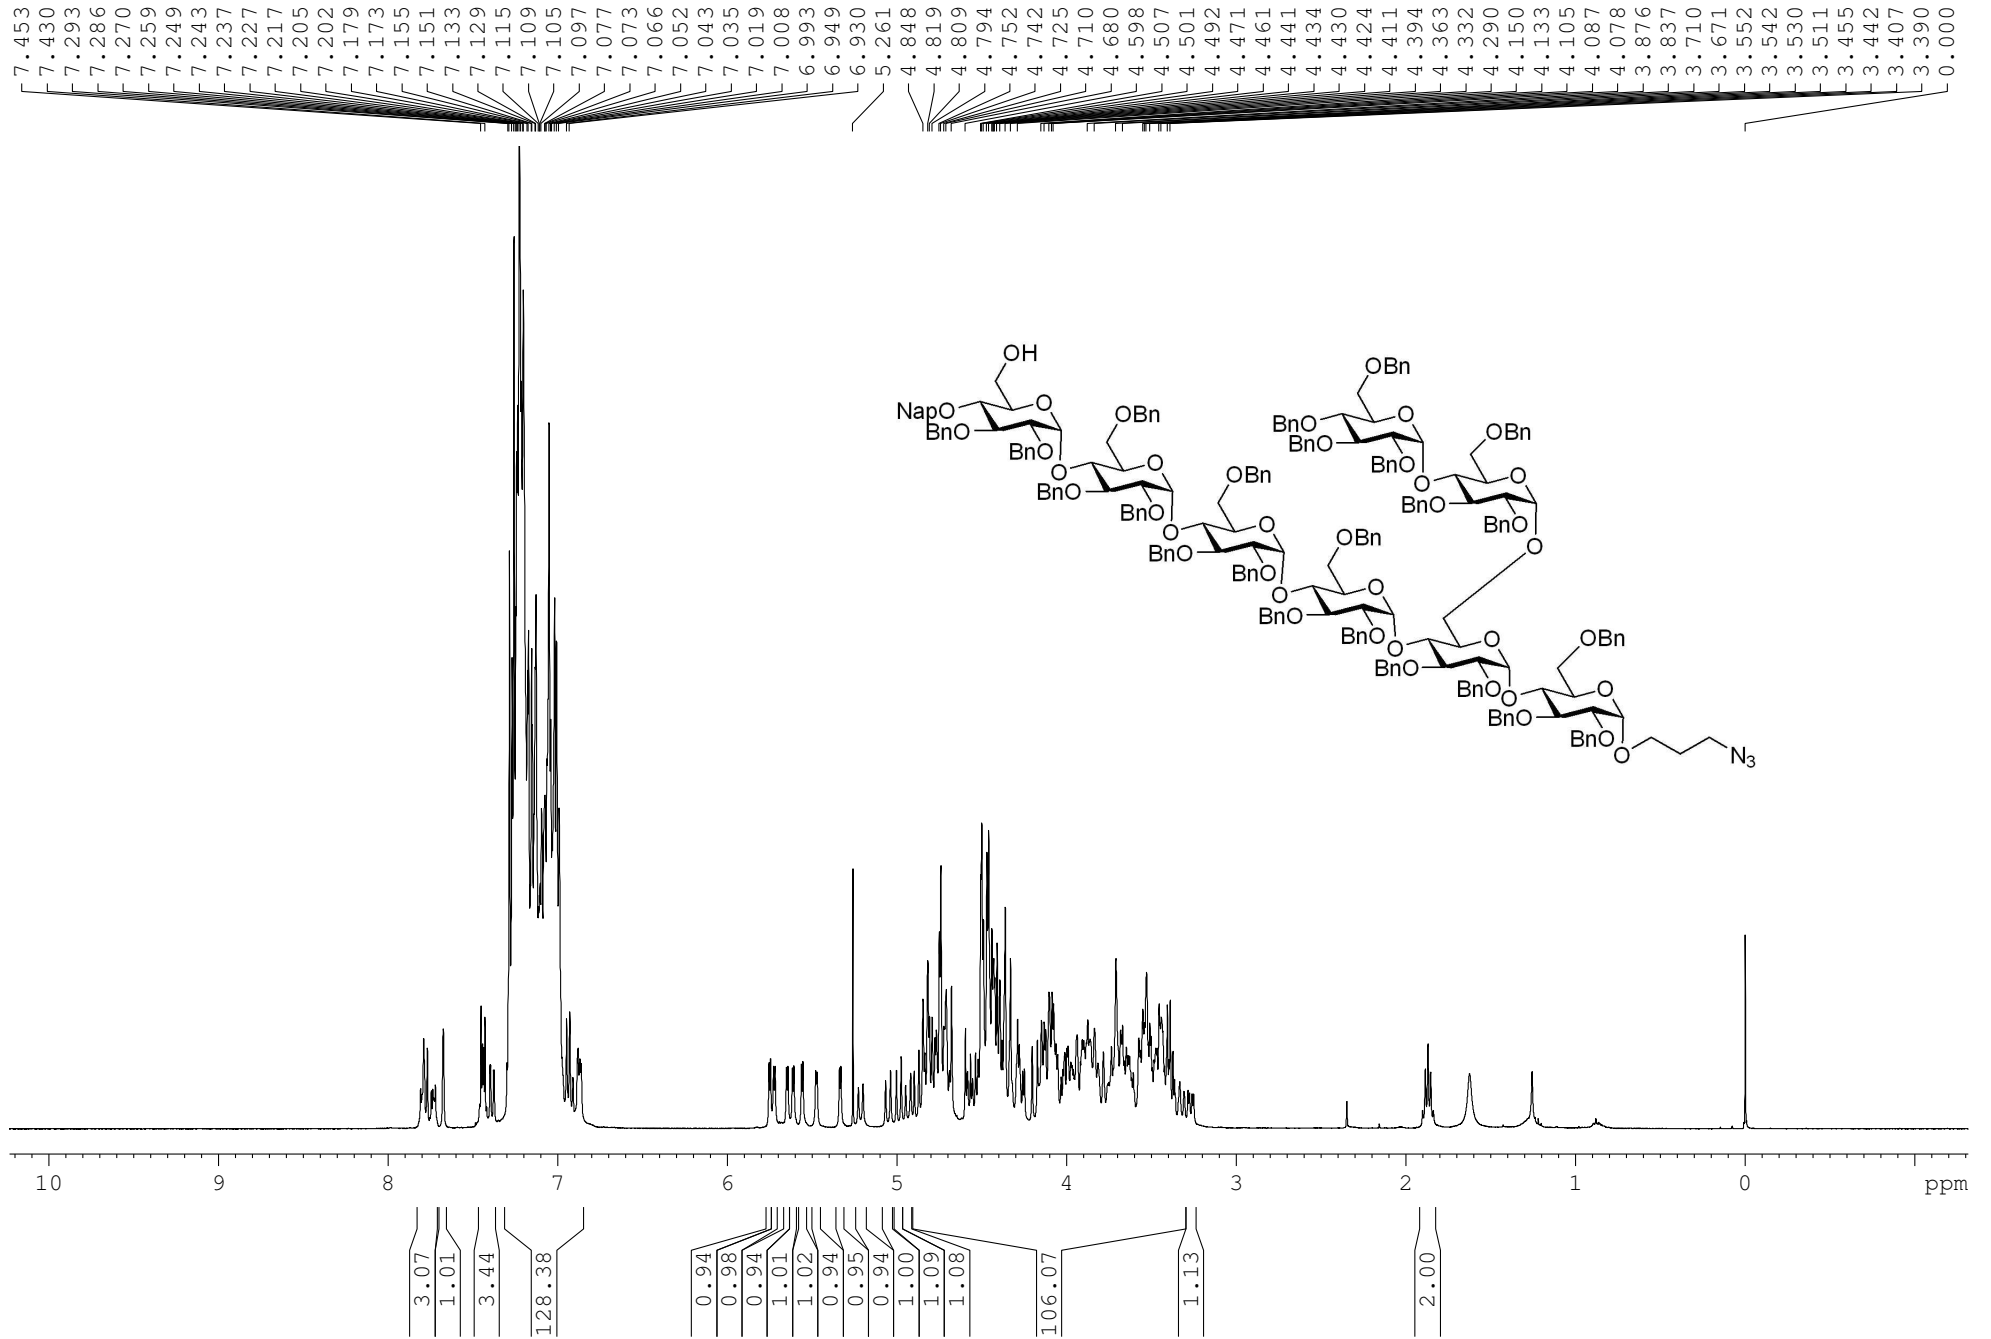





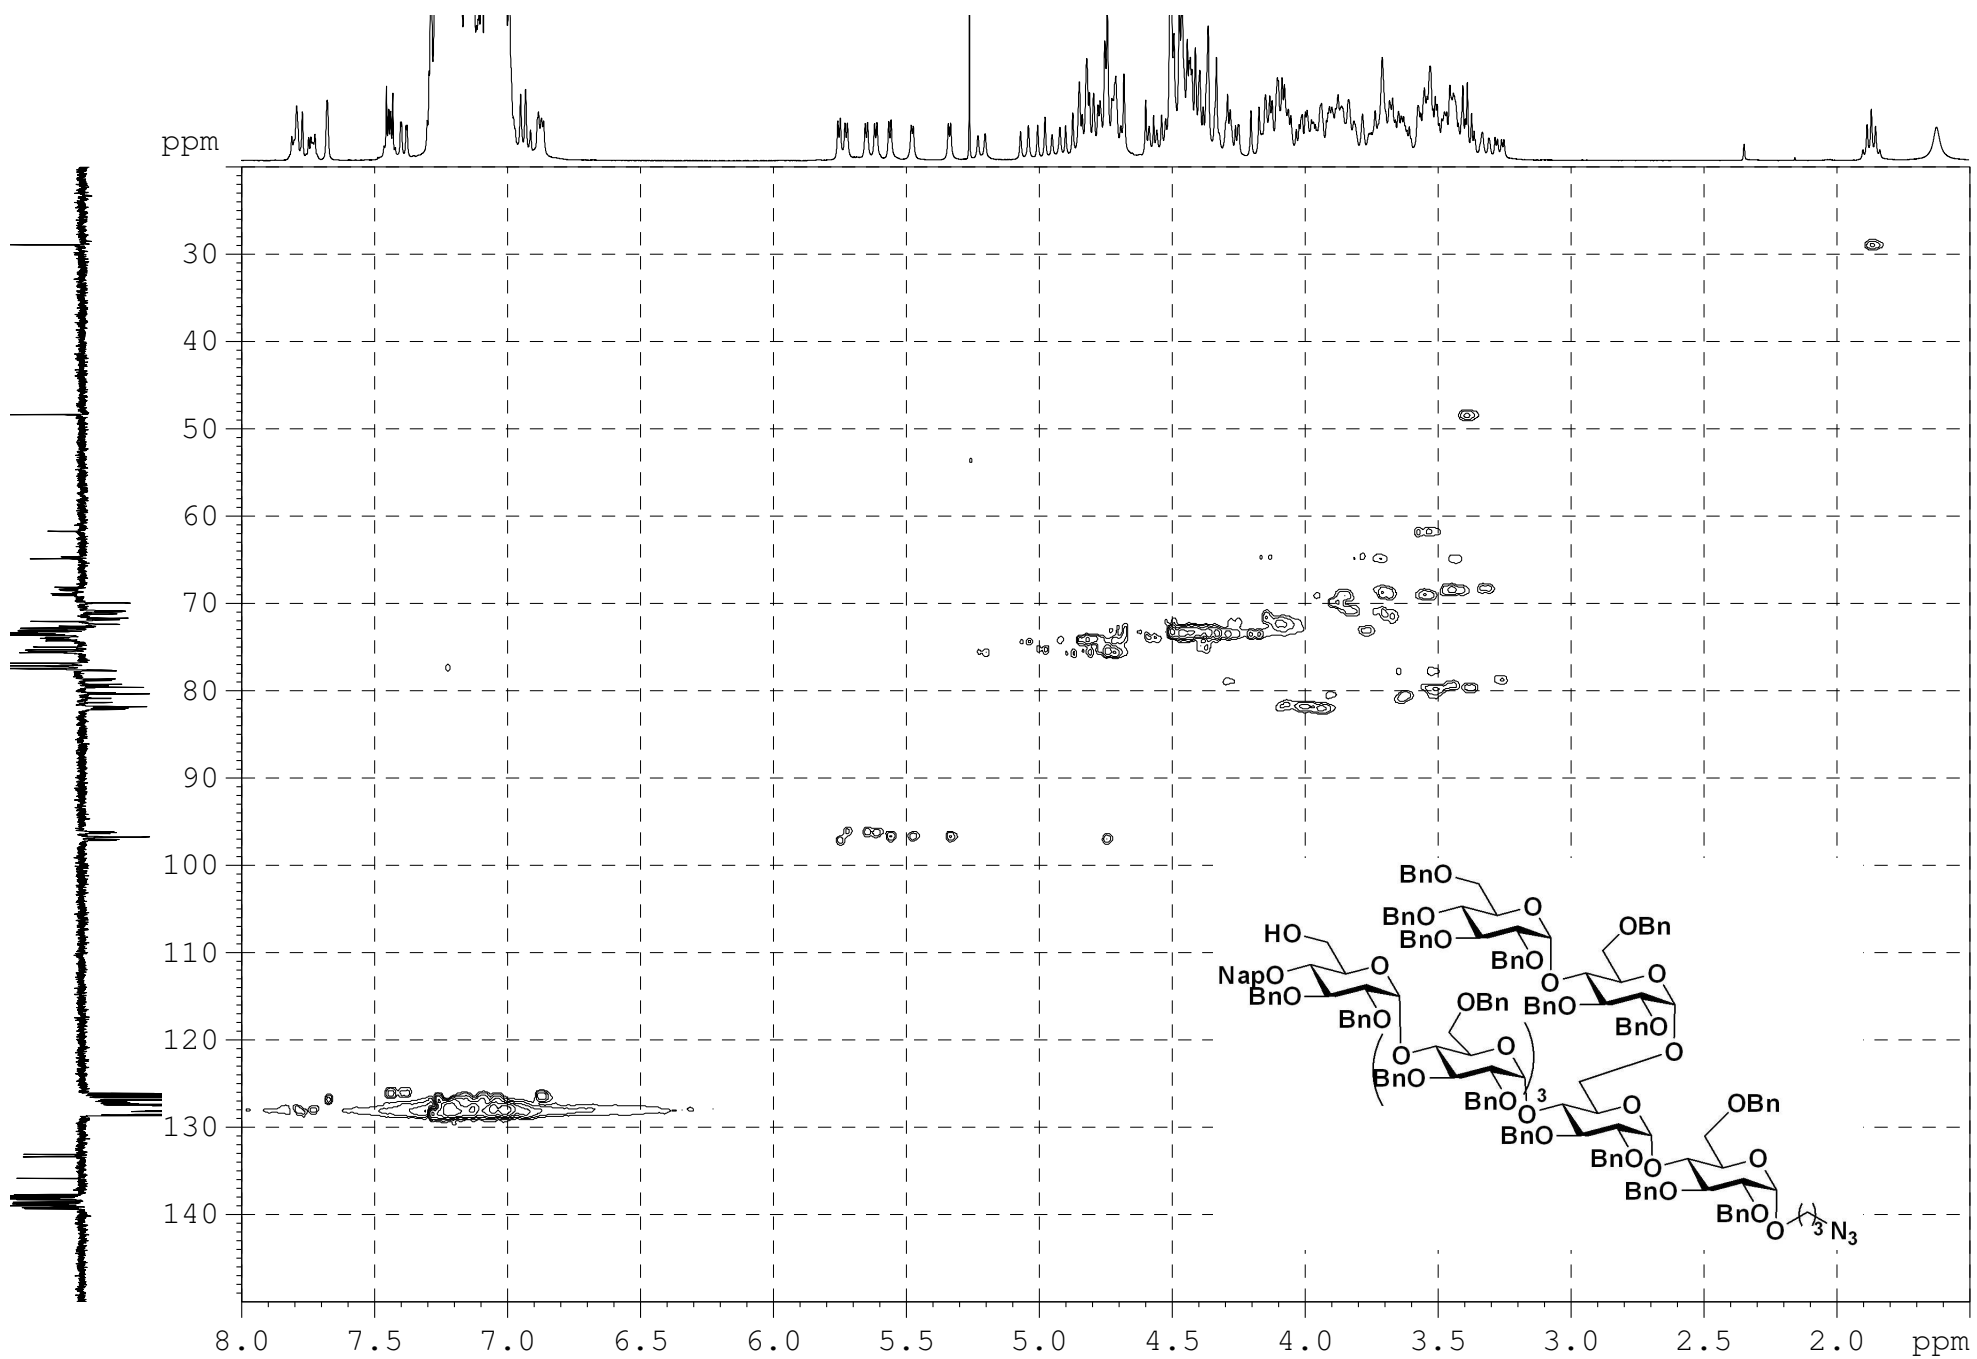

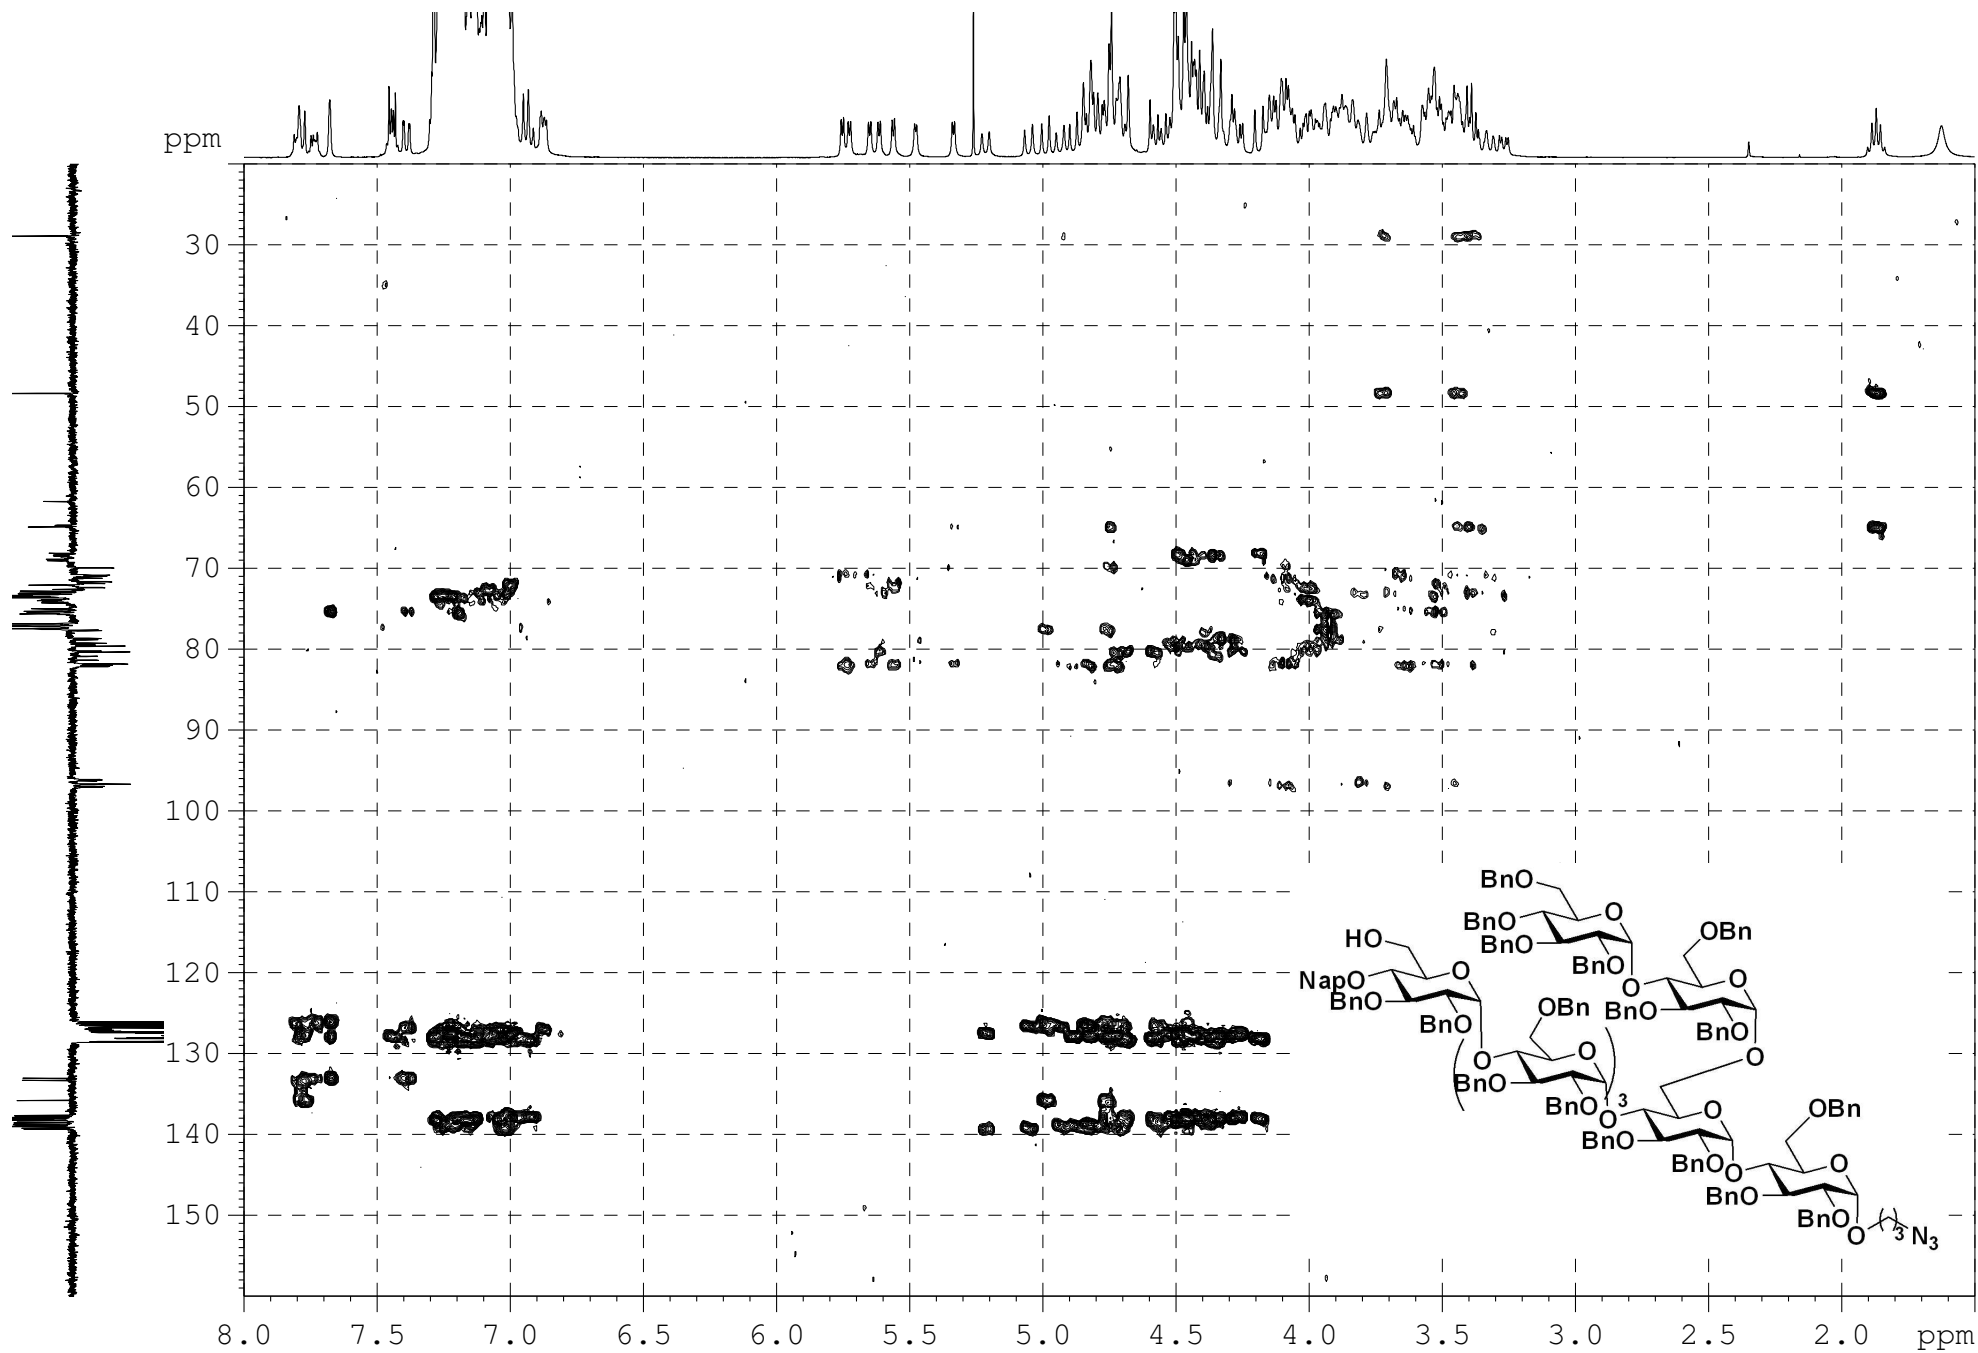



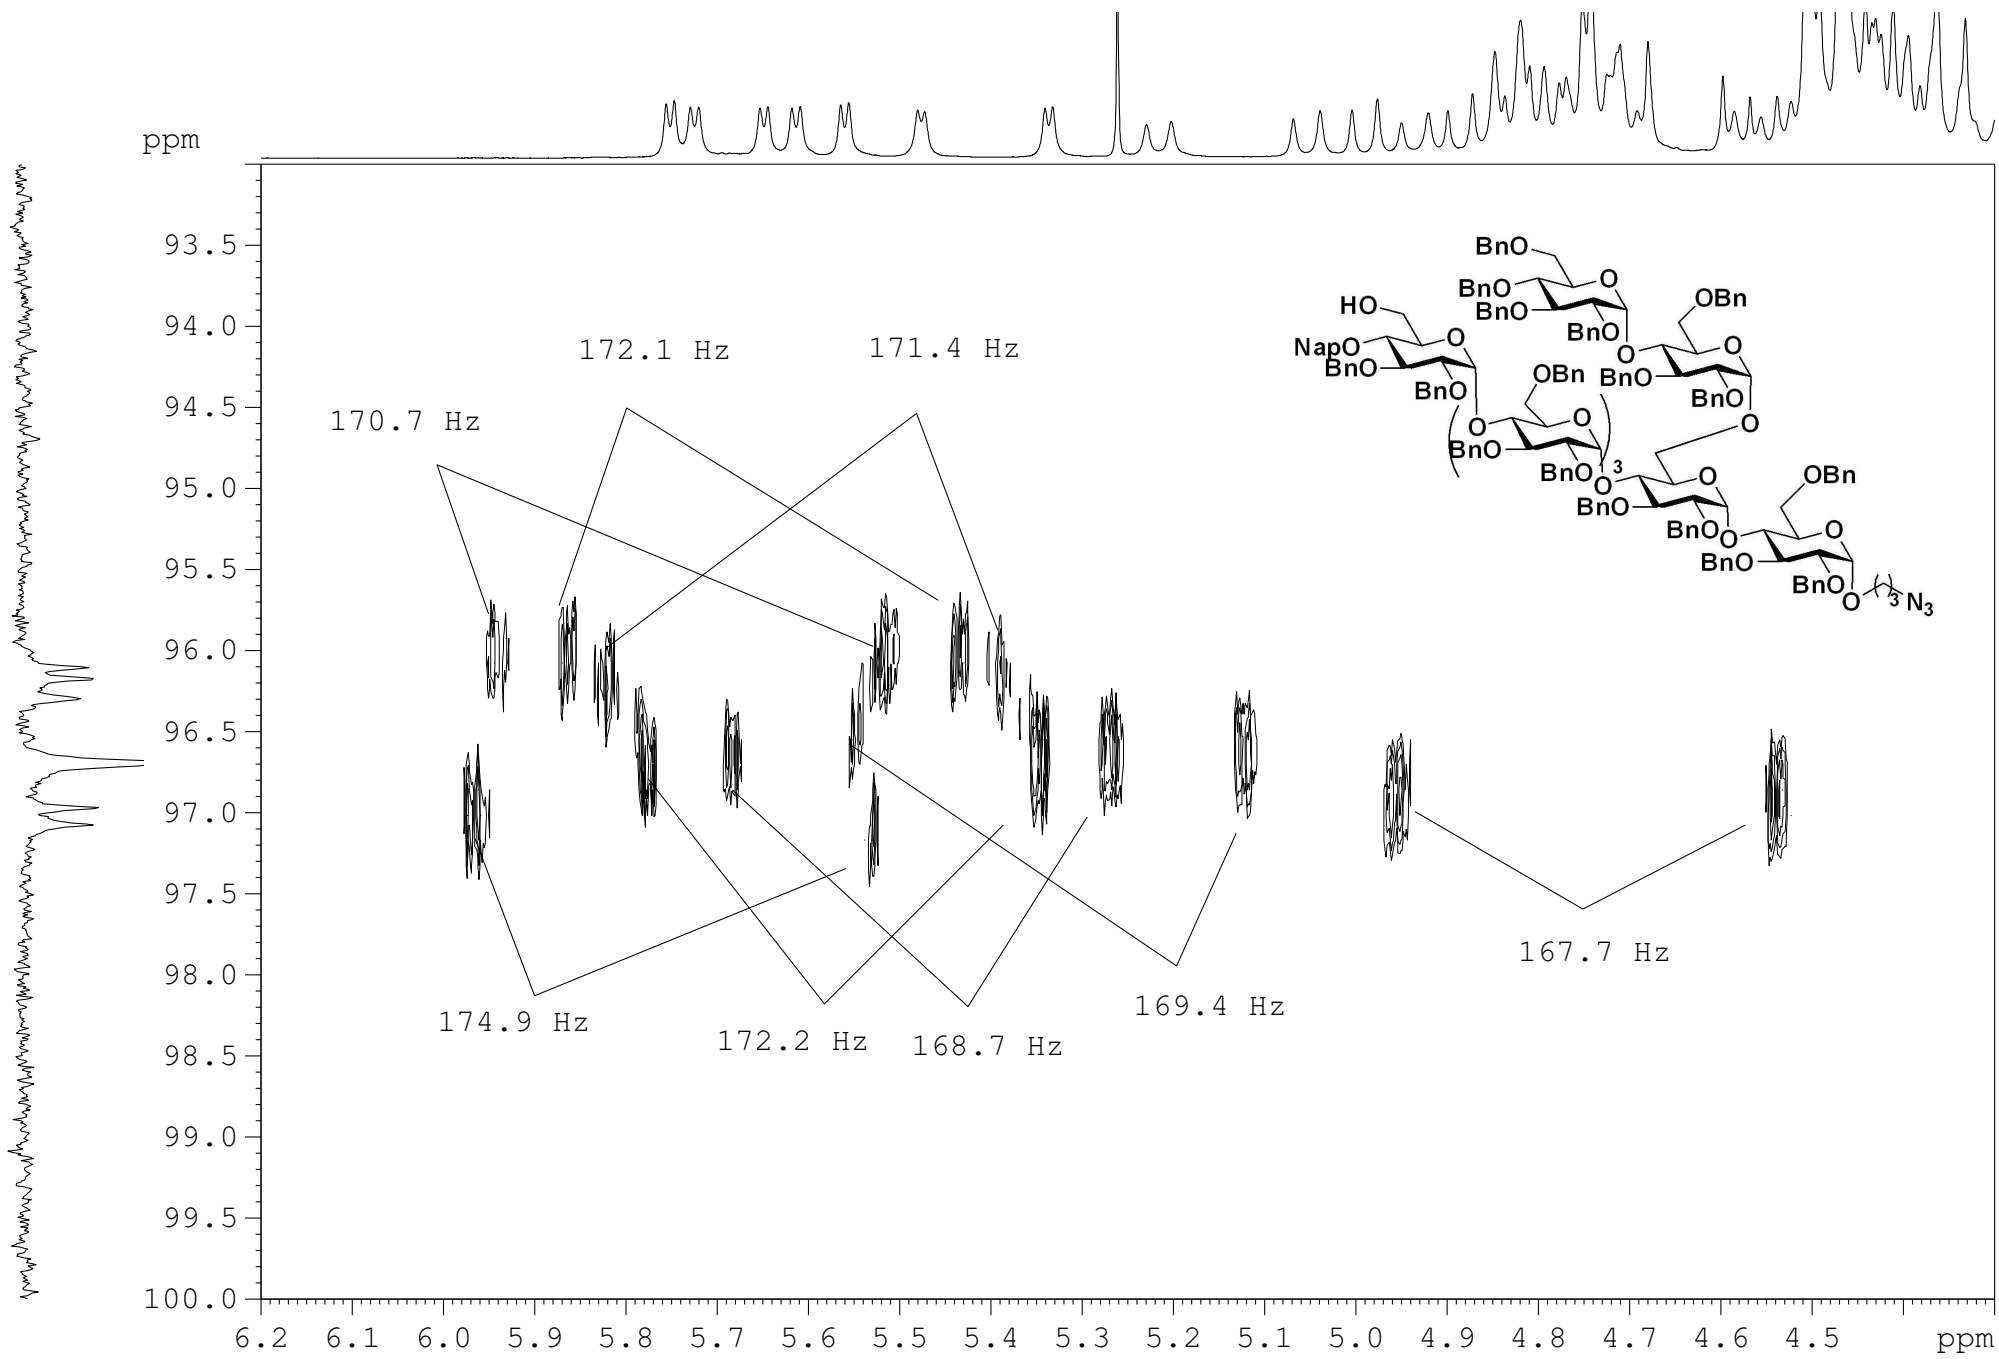

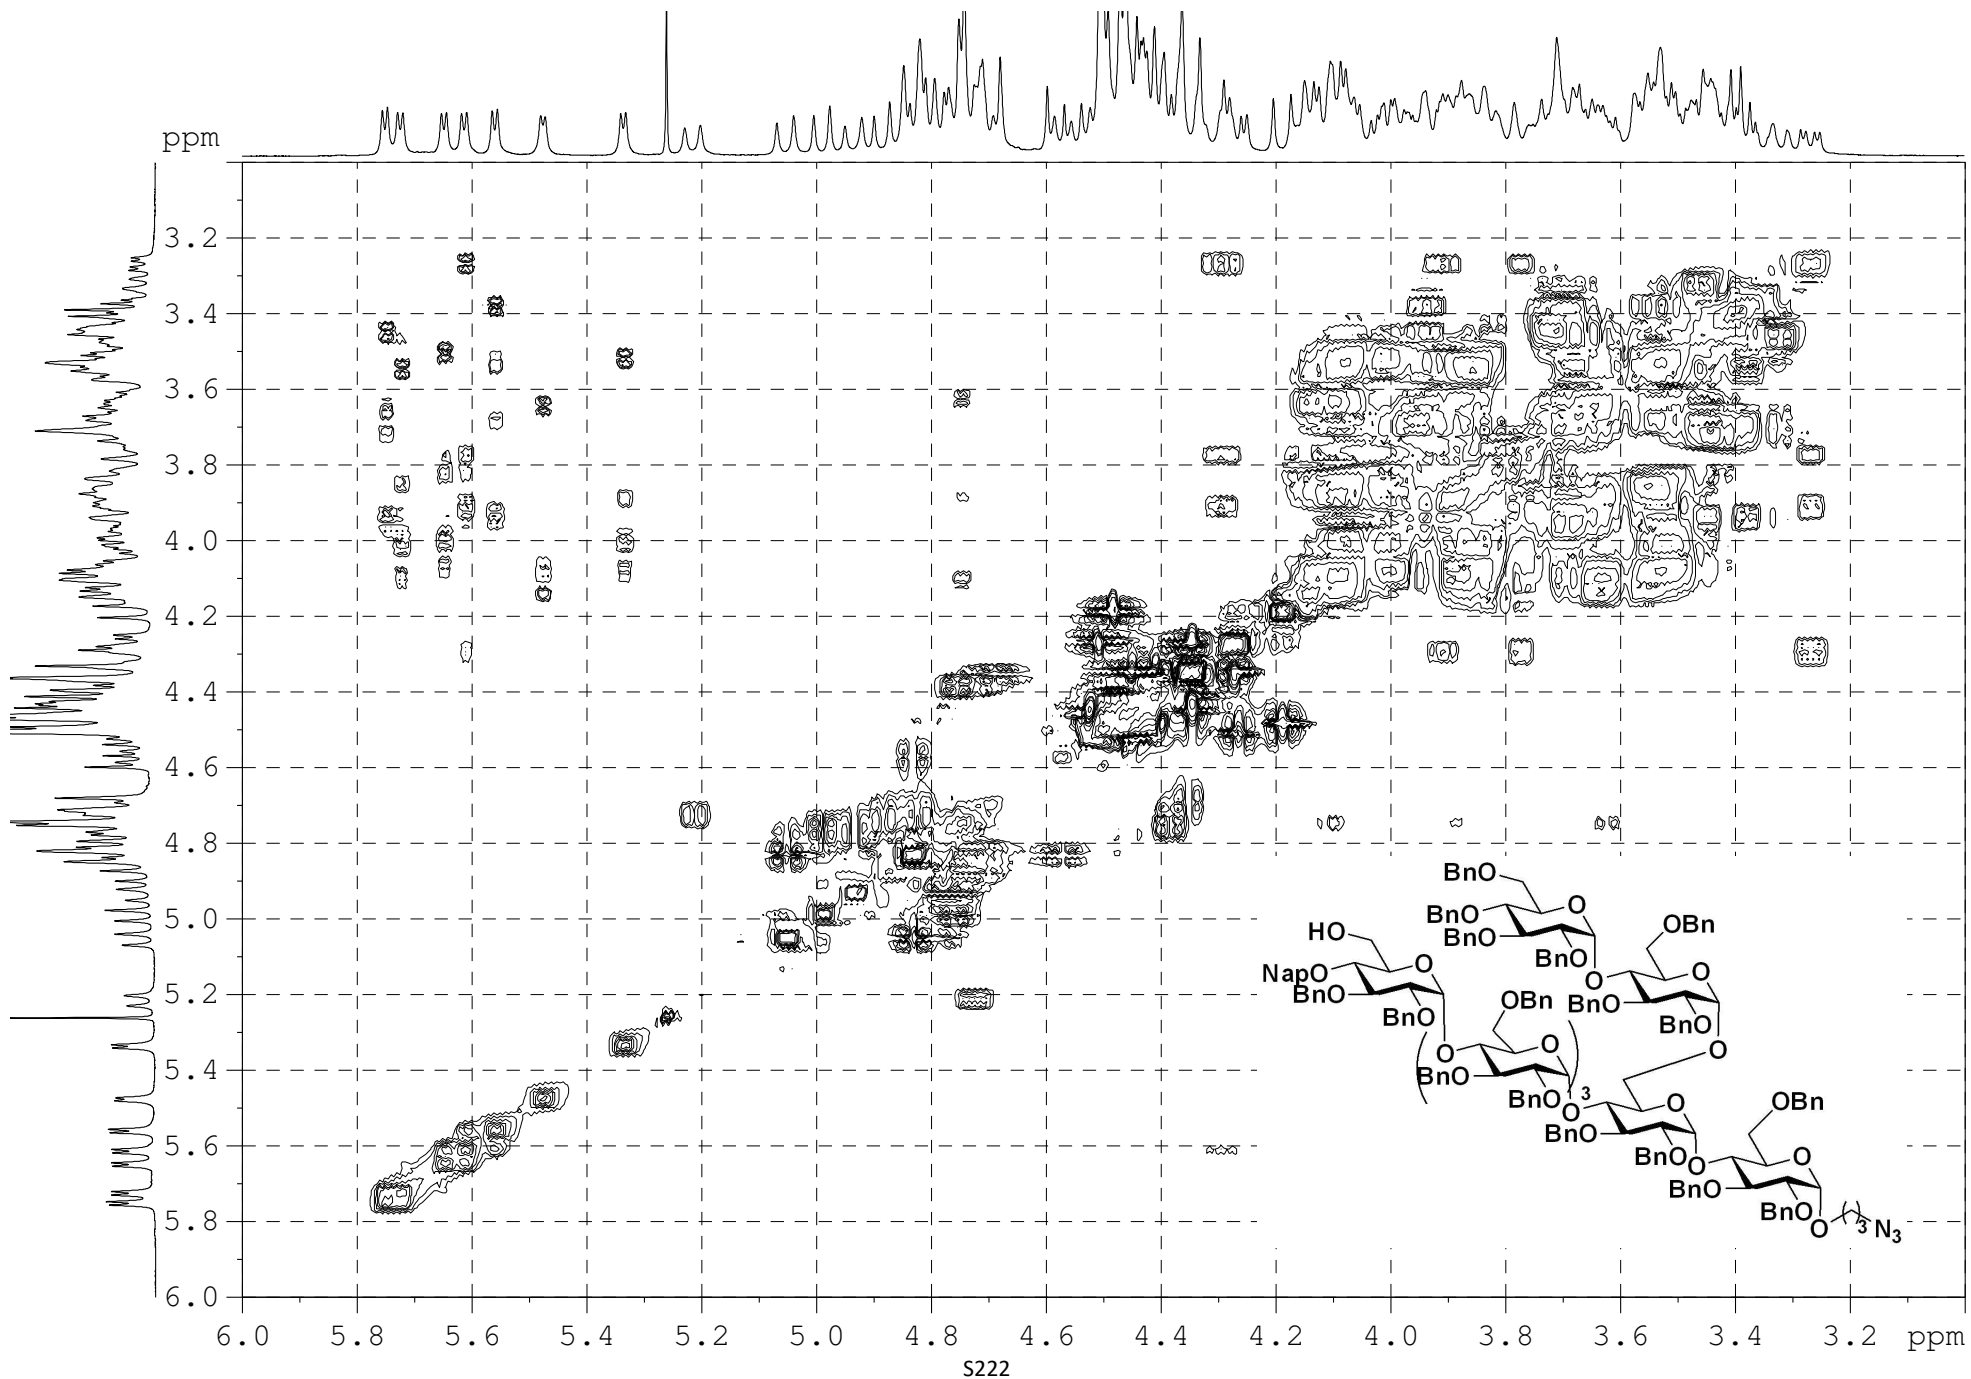

$^1\text{H-NMR}$ ,  $^{13}\text{C-APT}$ ,  $^1\text{H-}^1\text{H COSY}$ , HSQC, HMBC, GATED of **44**

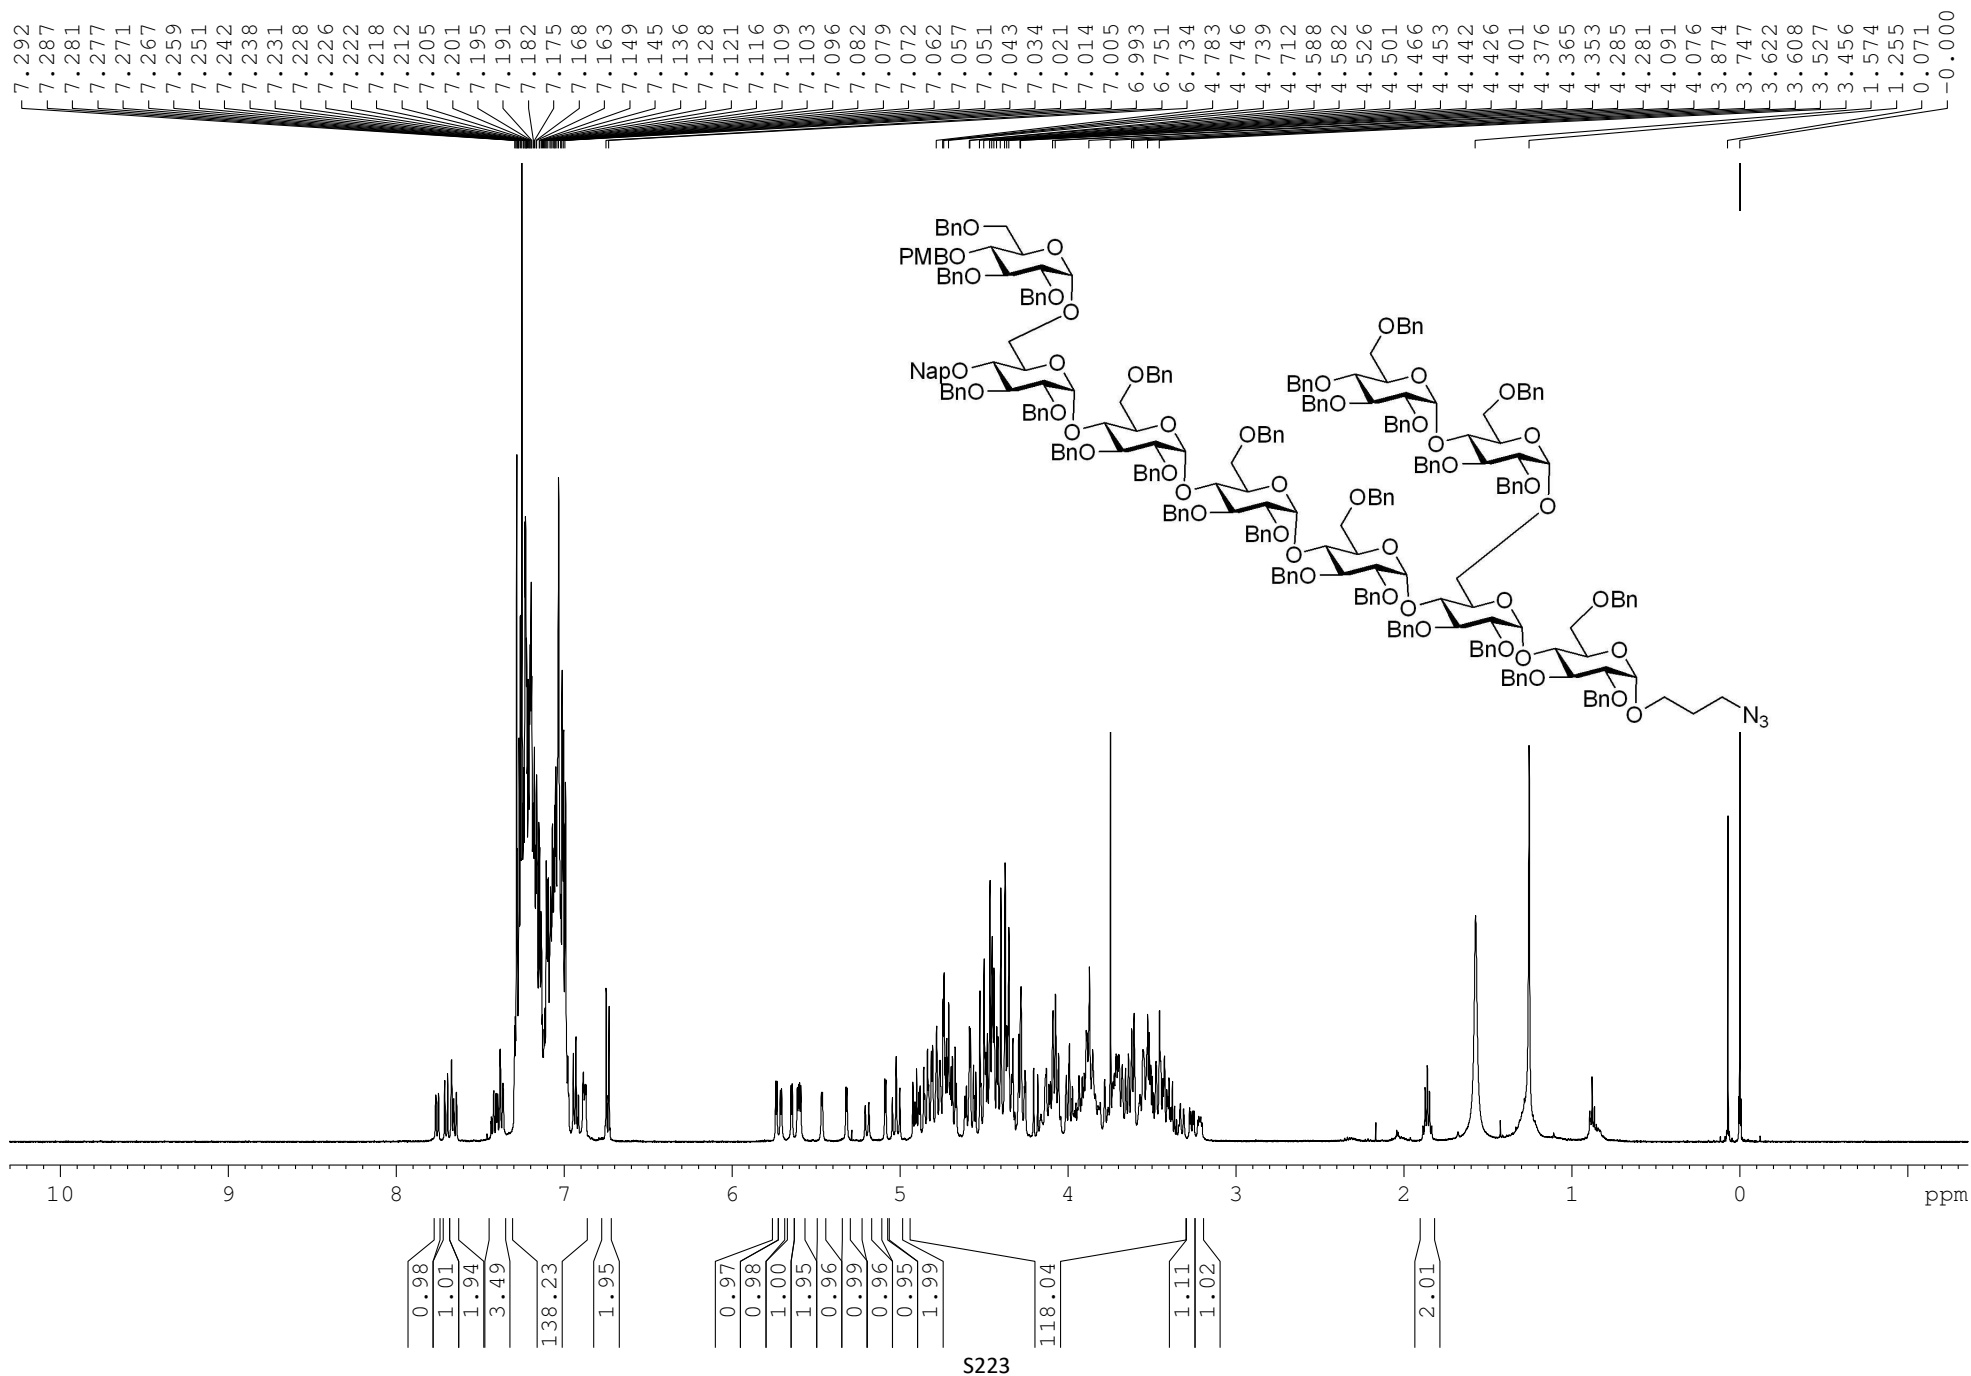

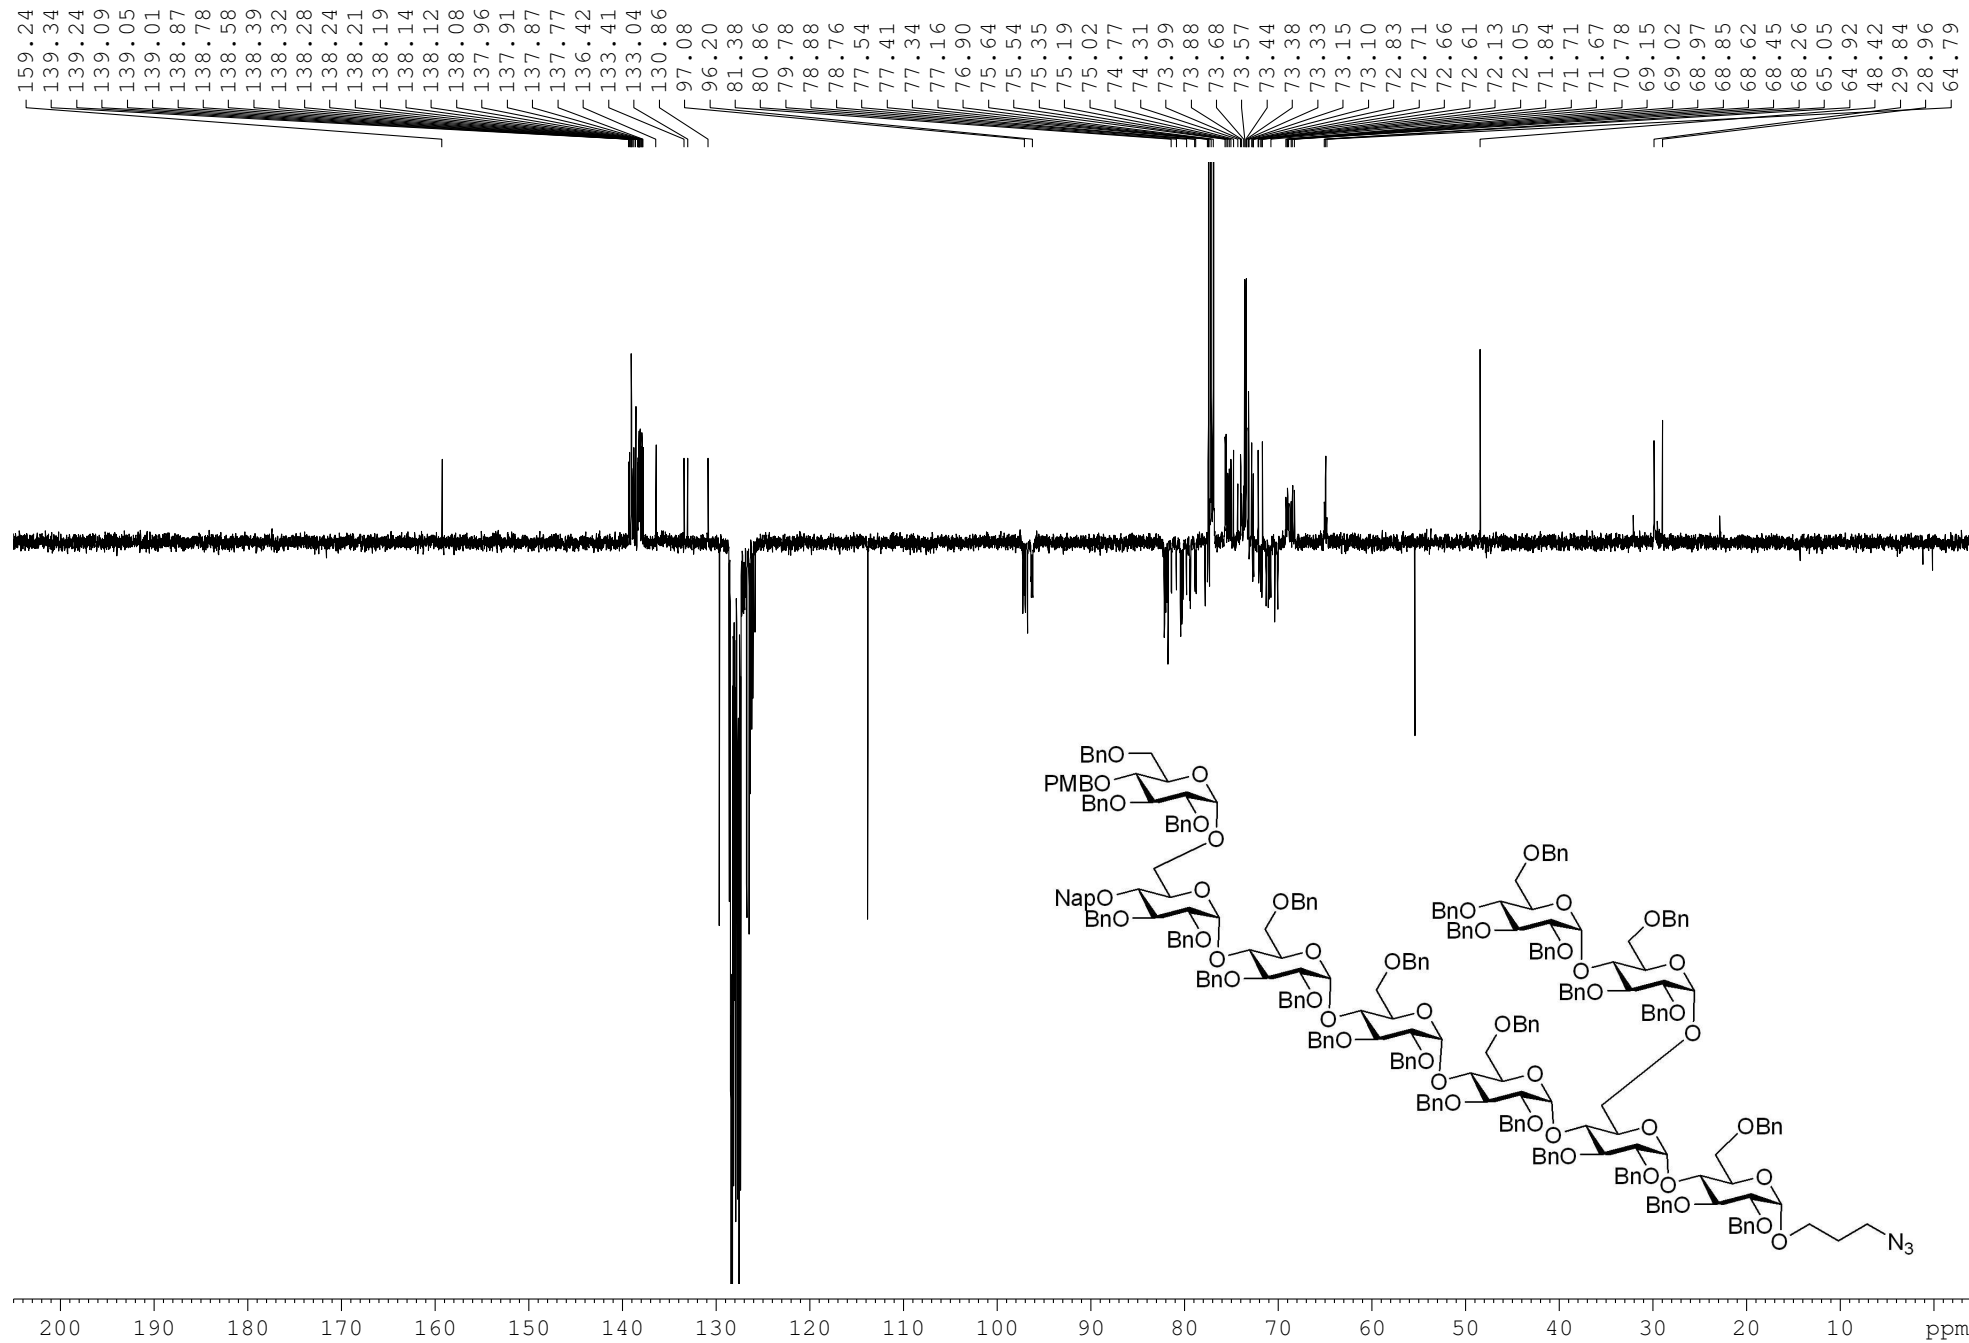



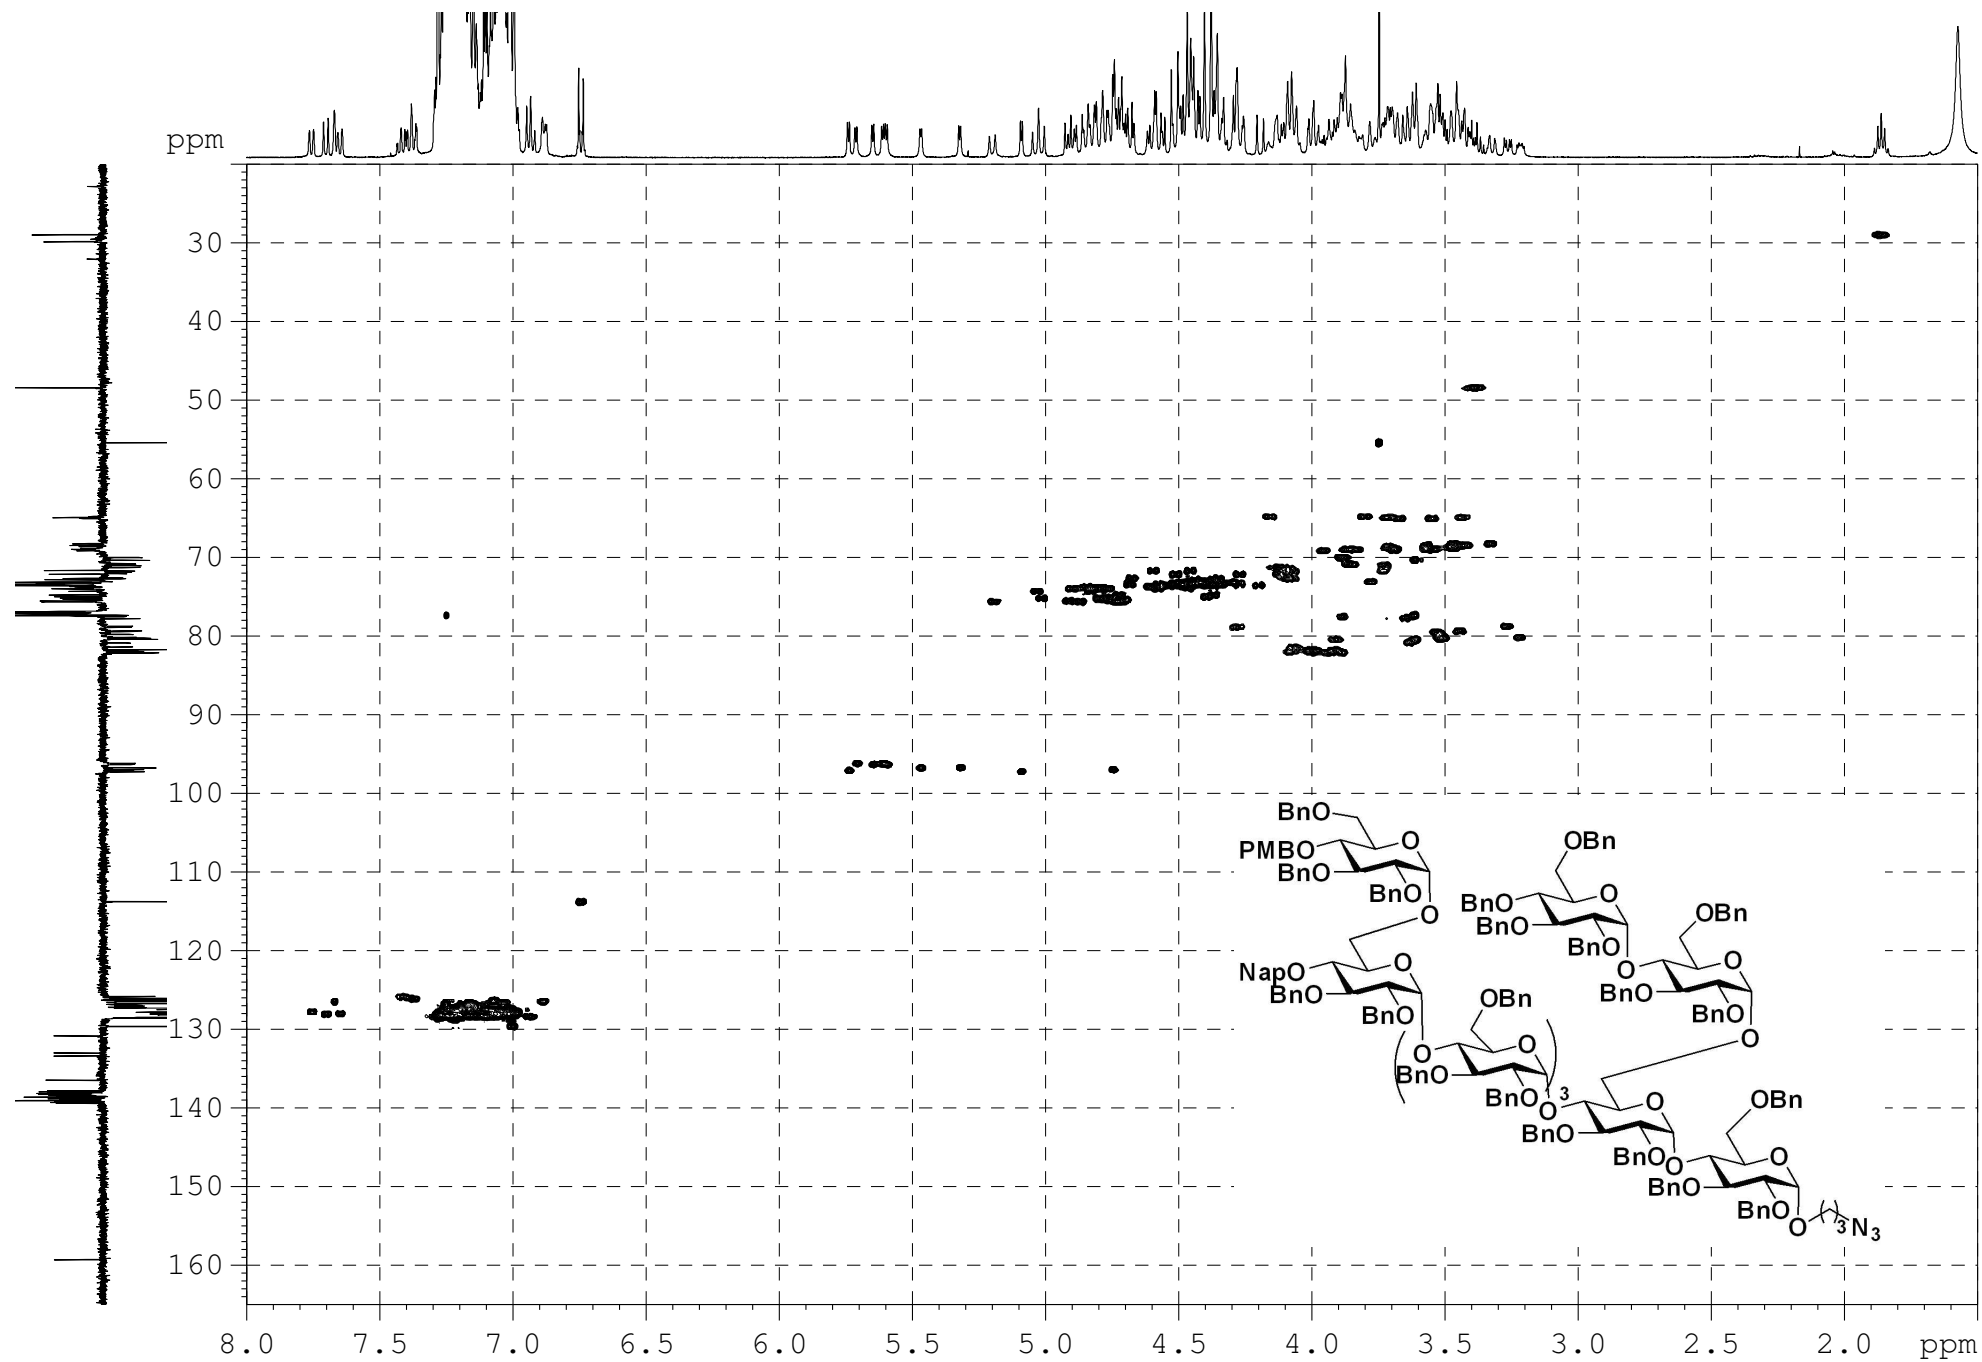

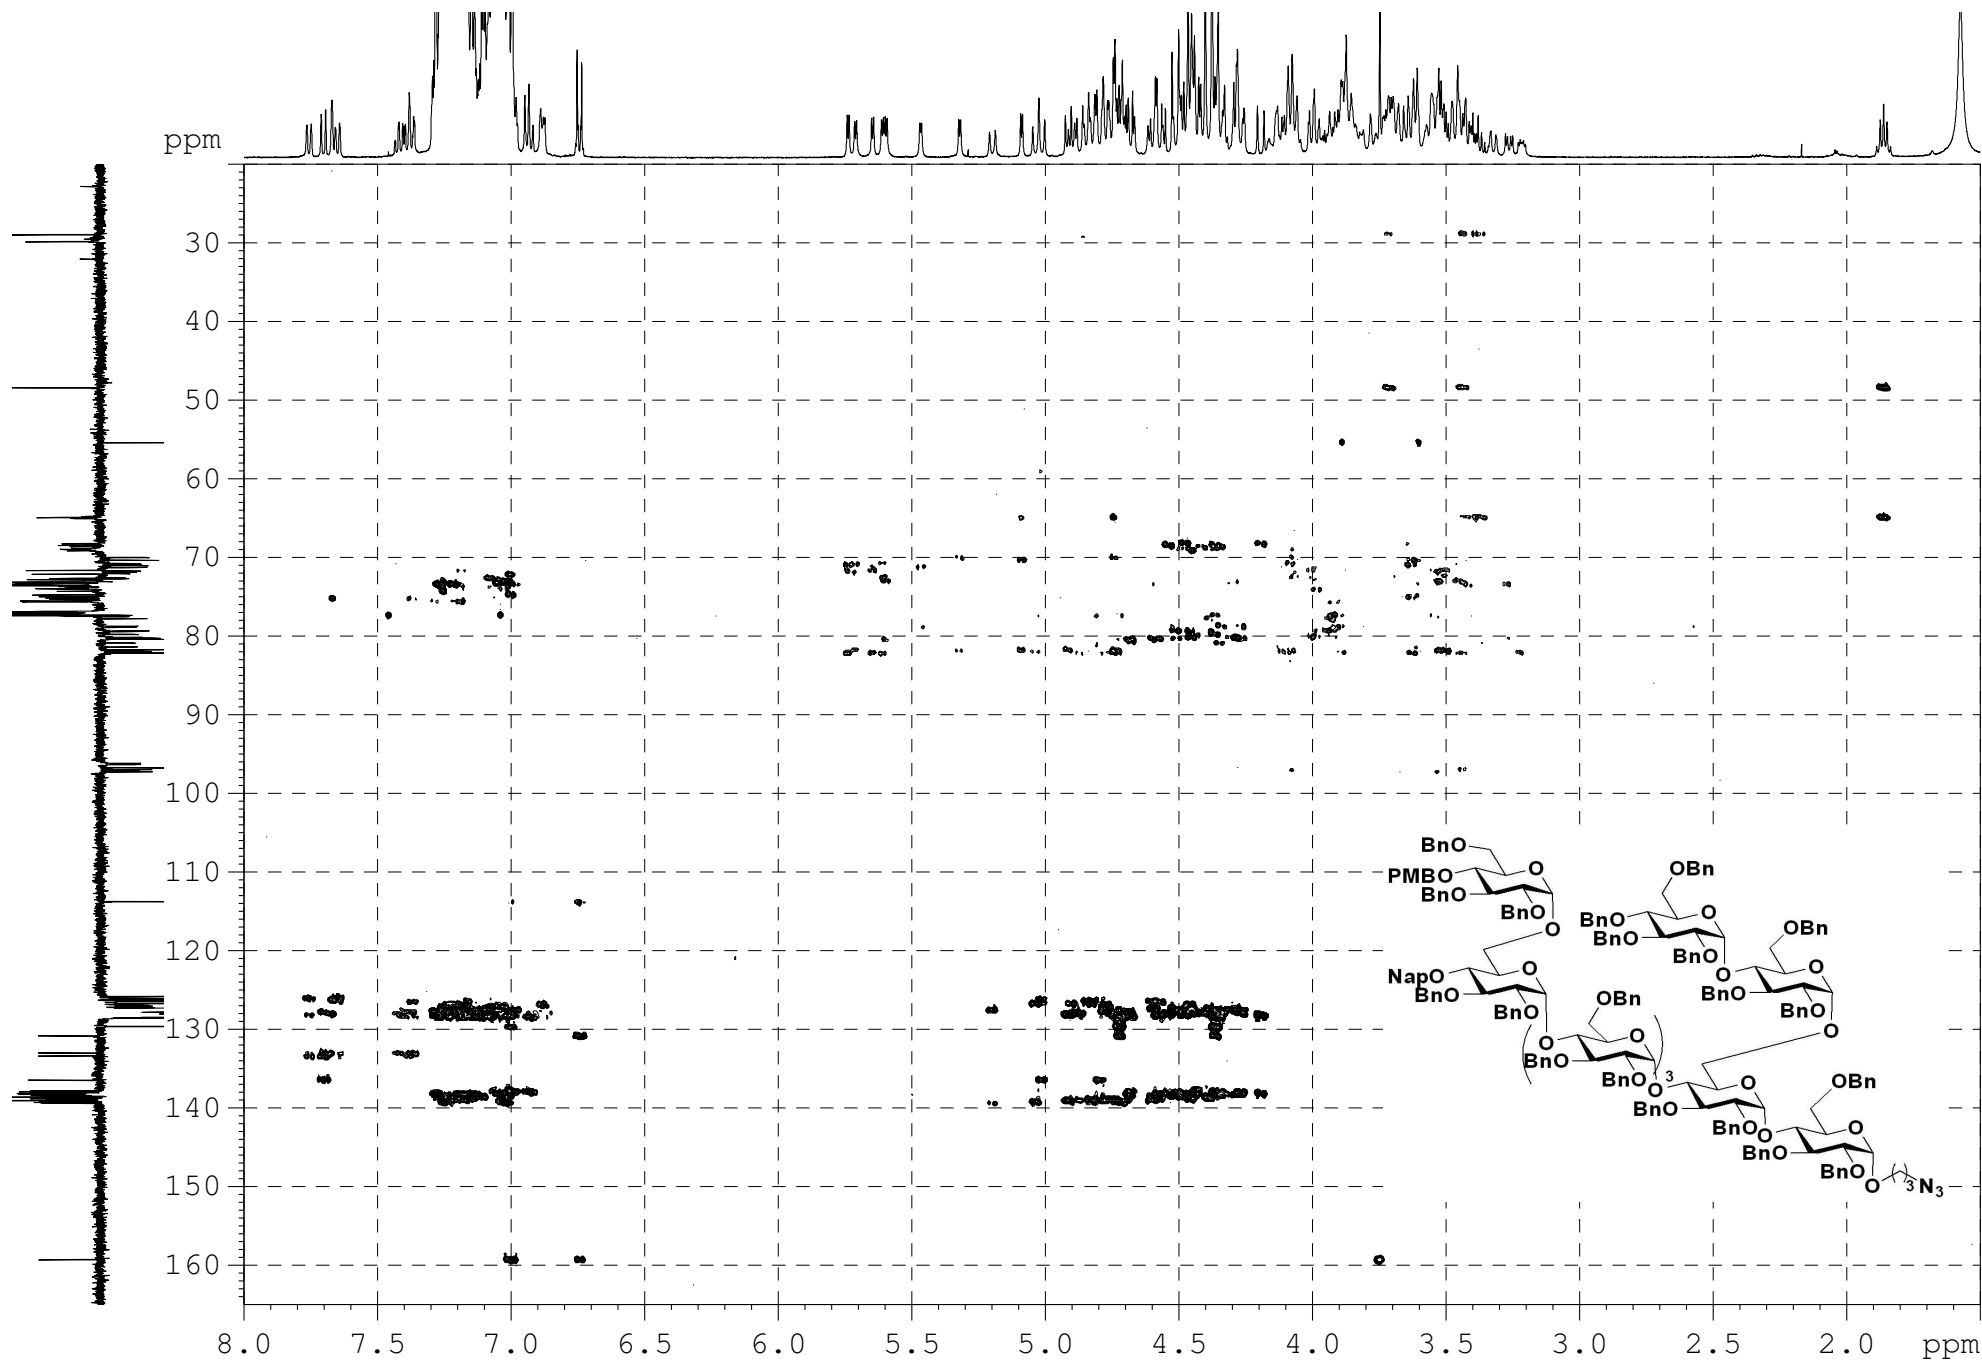





<sup>1</sup>H-NMR, <sup>13</sup>C-APT, <sup>1</sup>H-<sup>1</sup>H COSY, HSQC, HMBC, GATED of **1**

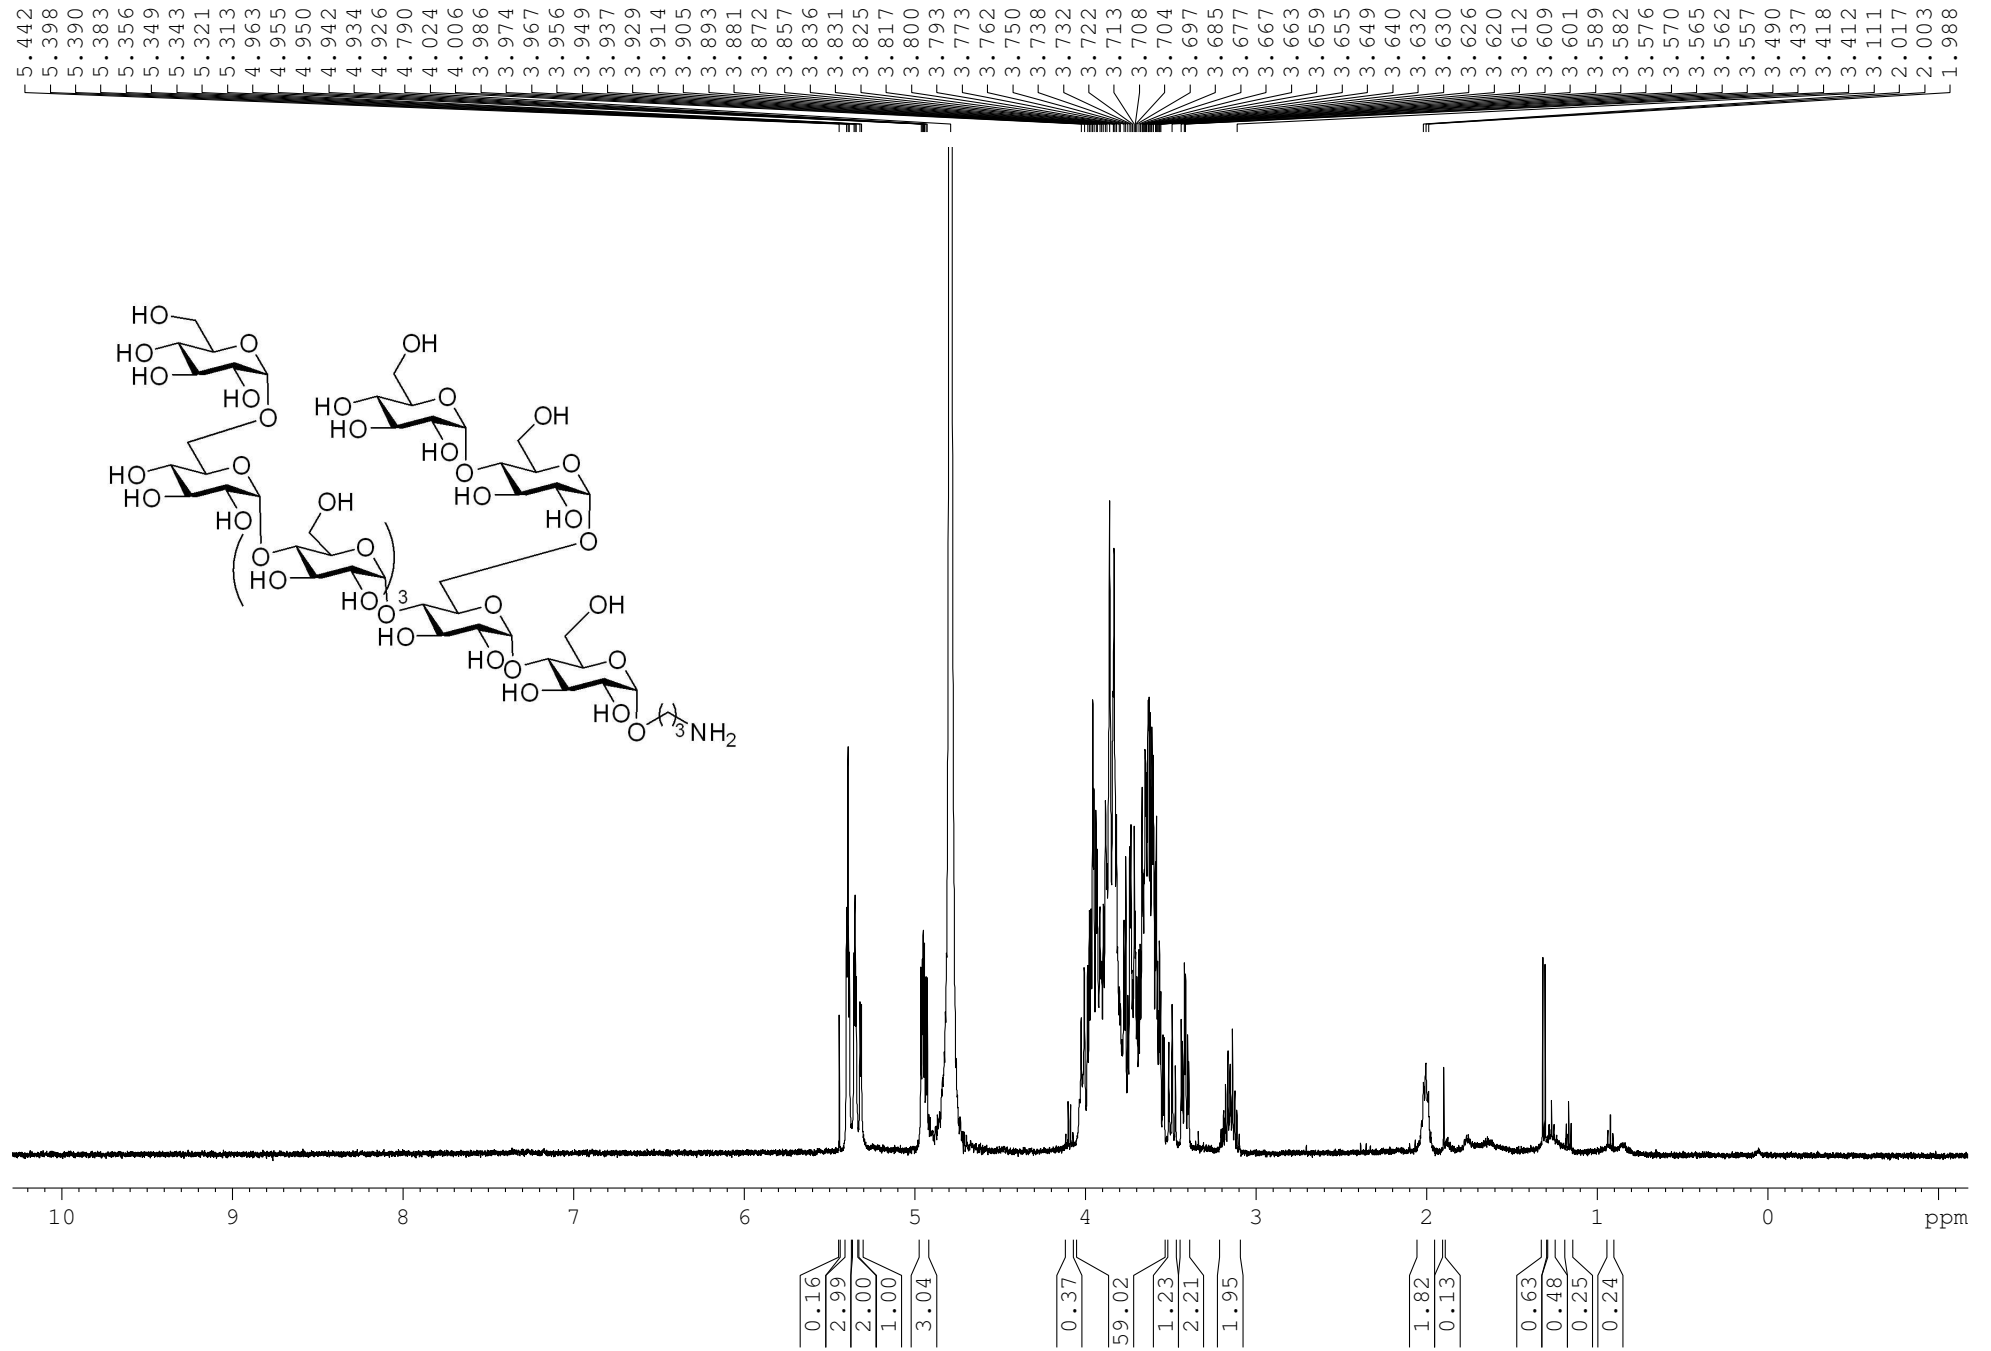

5.442  
5.398  
5.390  
5.383  
5.356  
5.349  
5.343  
5.321  
5.313  
4.963  
4.955  
4.950  
4.942  
4.934  
4.926  
4.790  
4.024  
4.006  
3.986  
3.974  
3.967  
3.956  
3.949  
3.937  
3.929  
3.914  
3.905  
3.893  
3.881  
3.872  
3.857  
3.836  
3.831  
3.825  
3.817  
3.800  
3.793  
3.773  
3.762  
3.750  
3.738  
3.732  
3.722  
3.713  
3.708  
3.704  
3.697  
3.685  
3.677  
3.667  
3.663  
3.659  
3.655  
3.649  
3.640  
3.632  
3.630  
3.626  
3.620  
3.612  
3.609  
3.601  
3.589  
3.582  
3.576  
3.570  
3.565  
3.562  
3.557  
3.490  
3.437  
3.418  
3.412  
3.111  
2.017  
2.003  
1.988

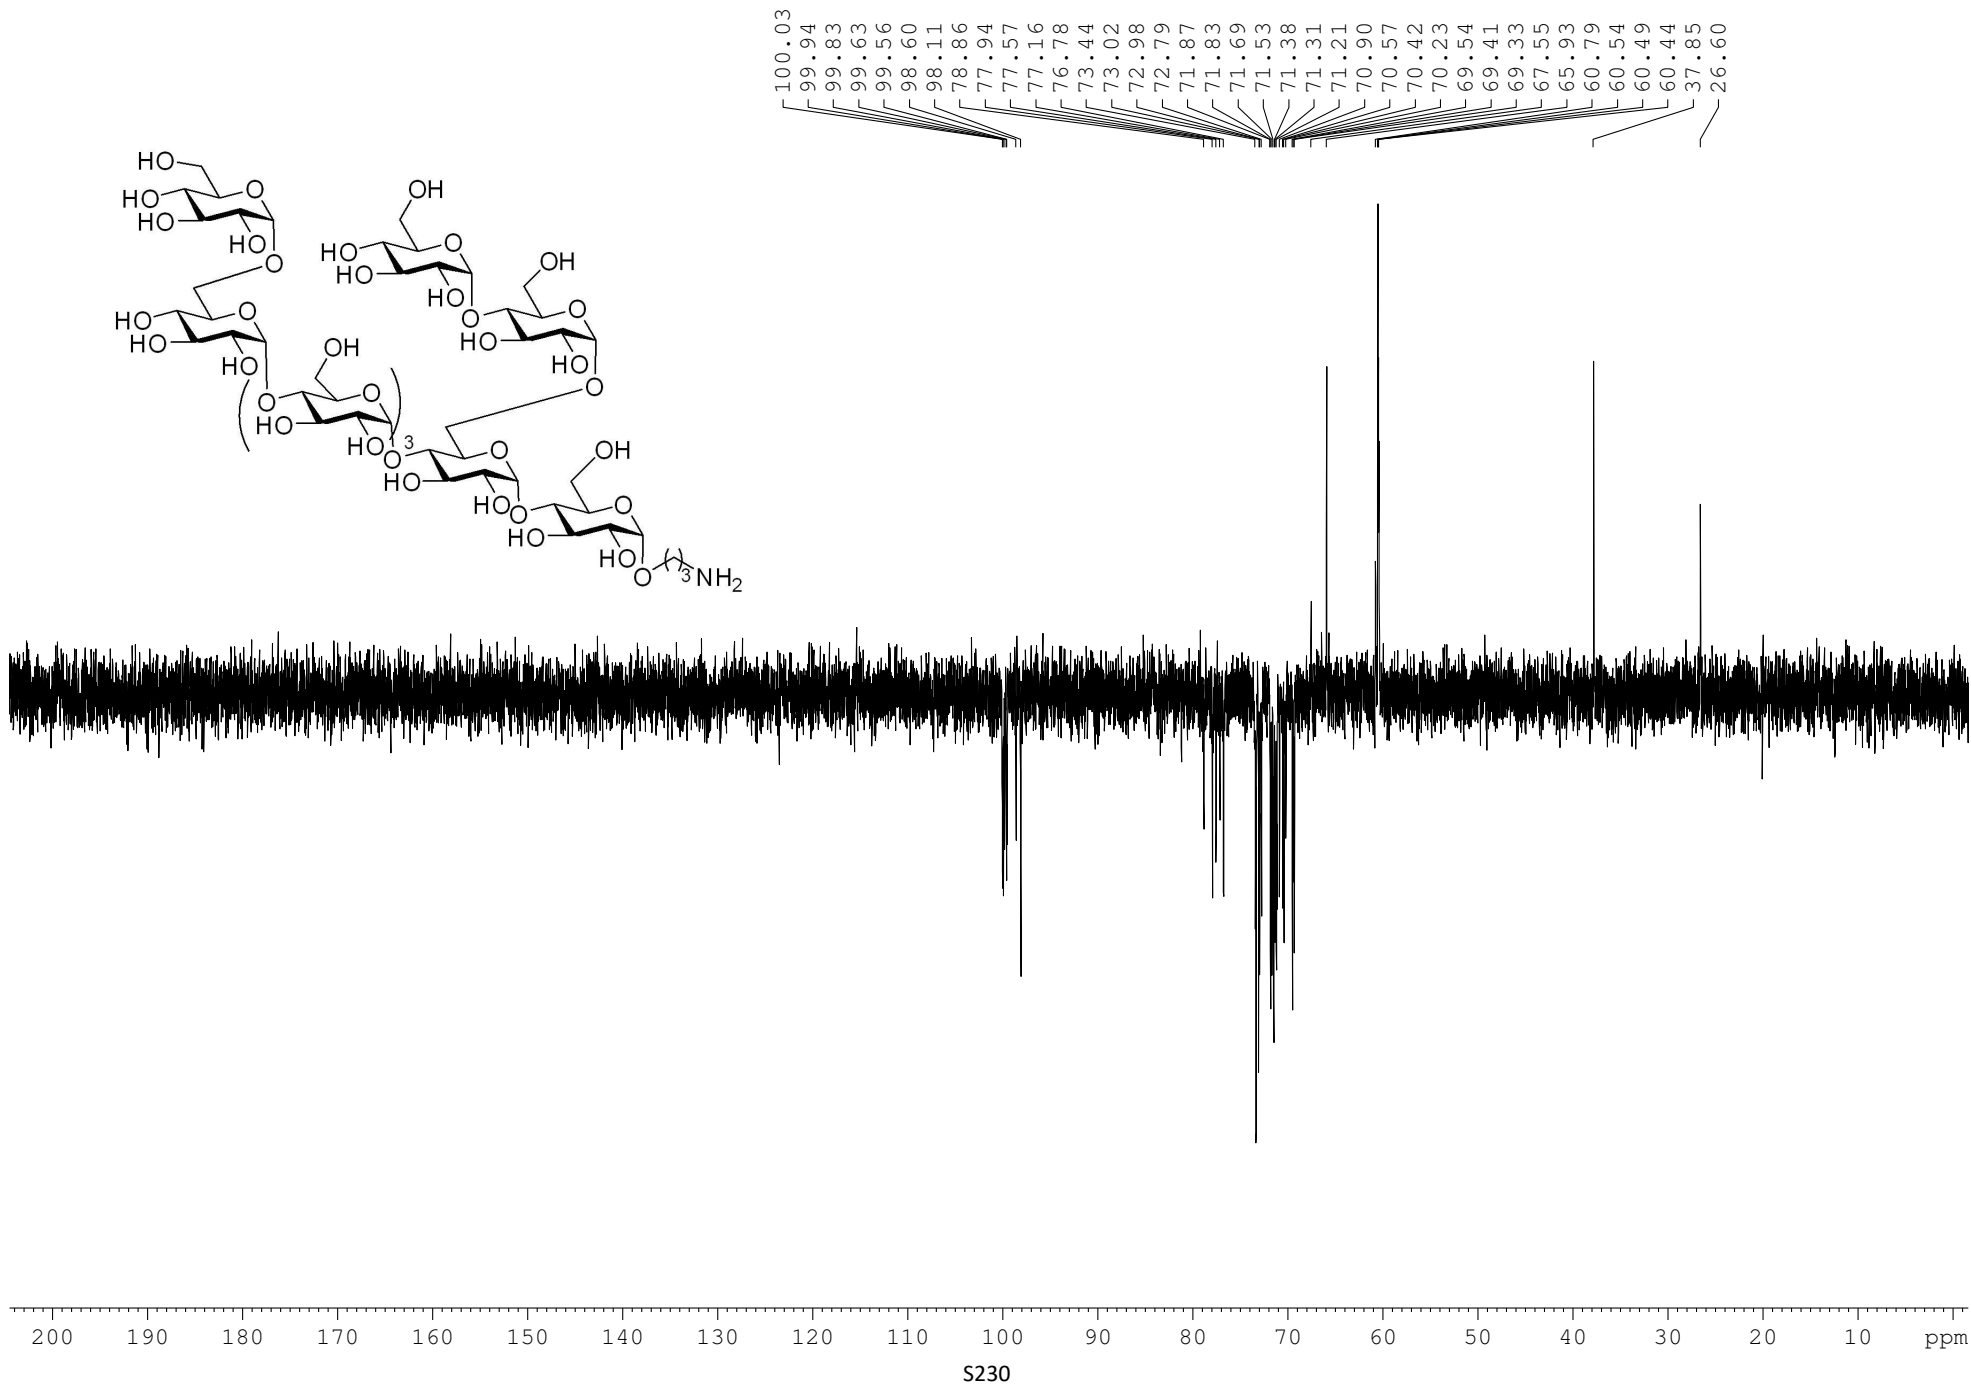

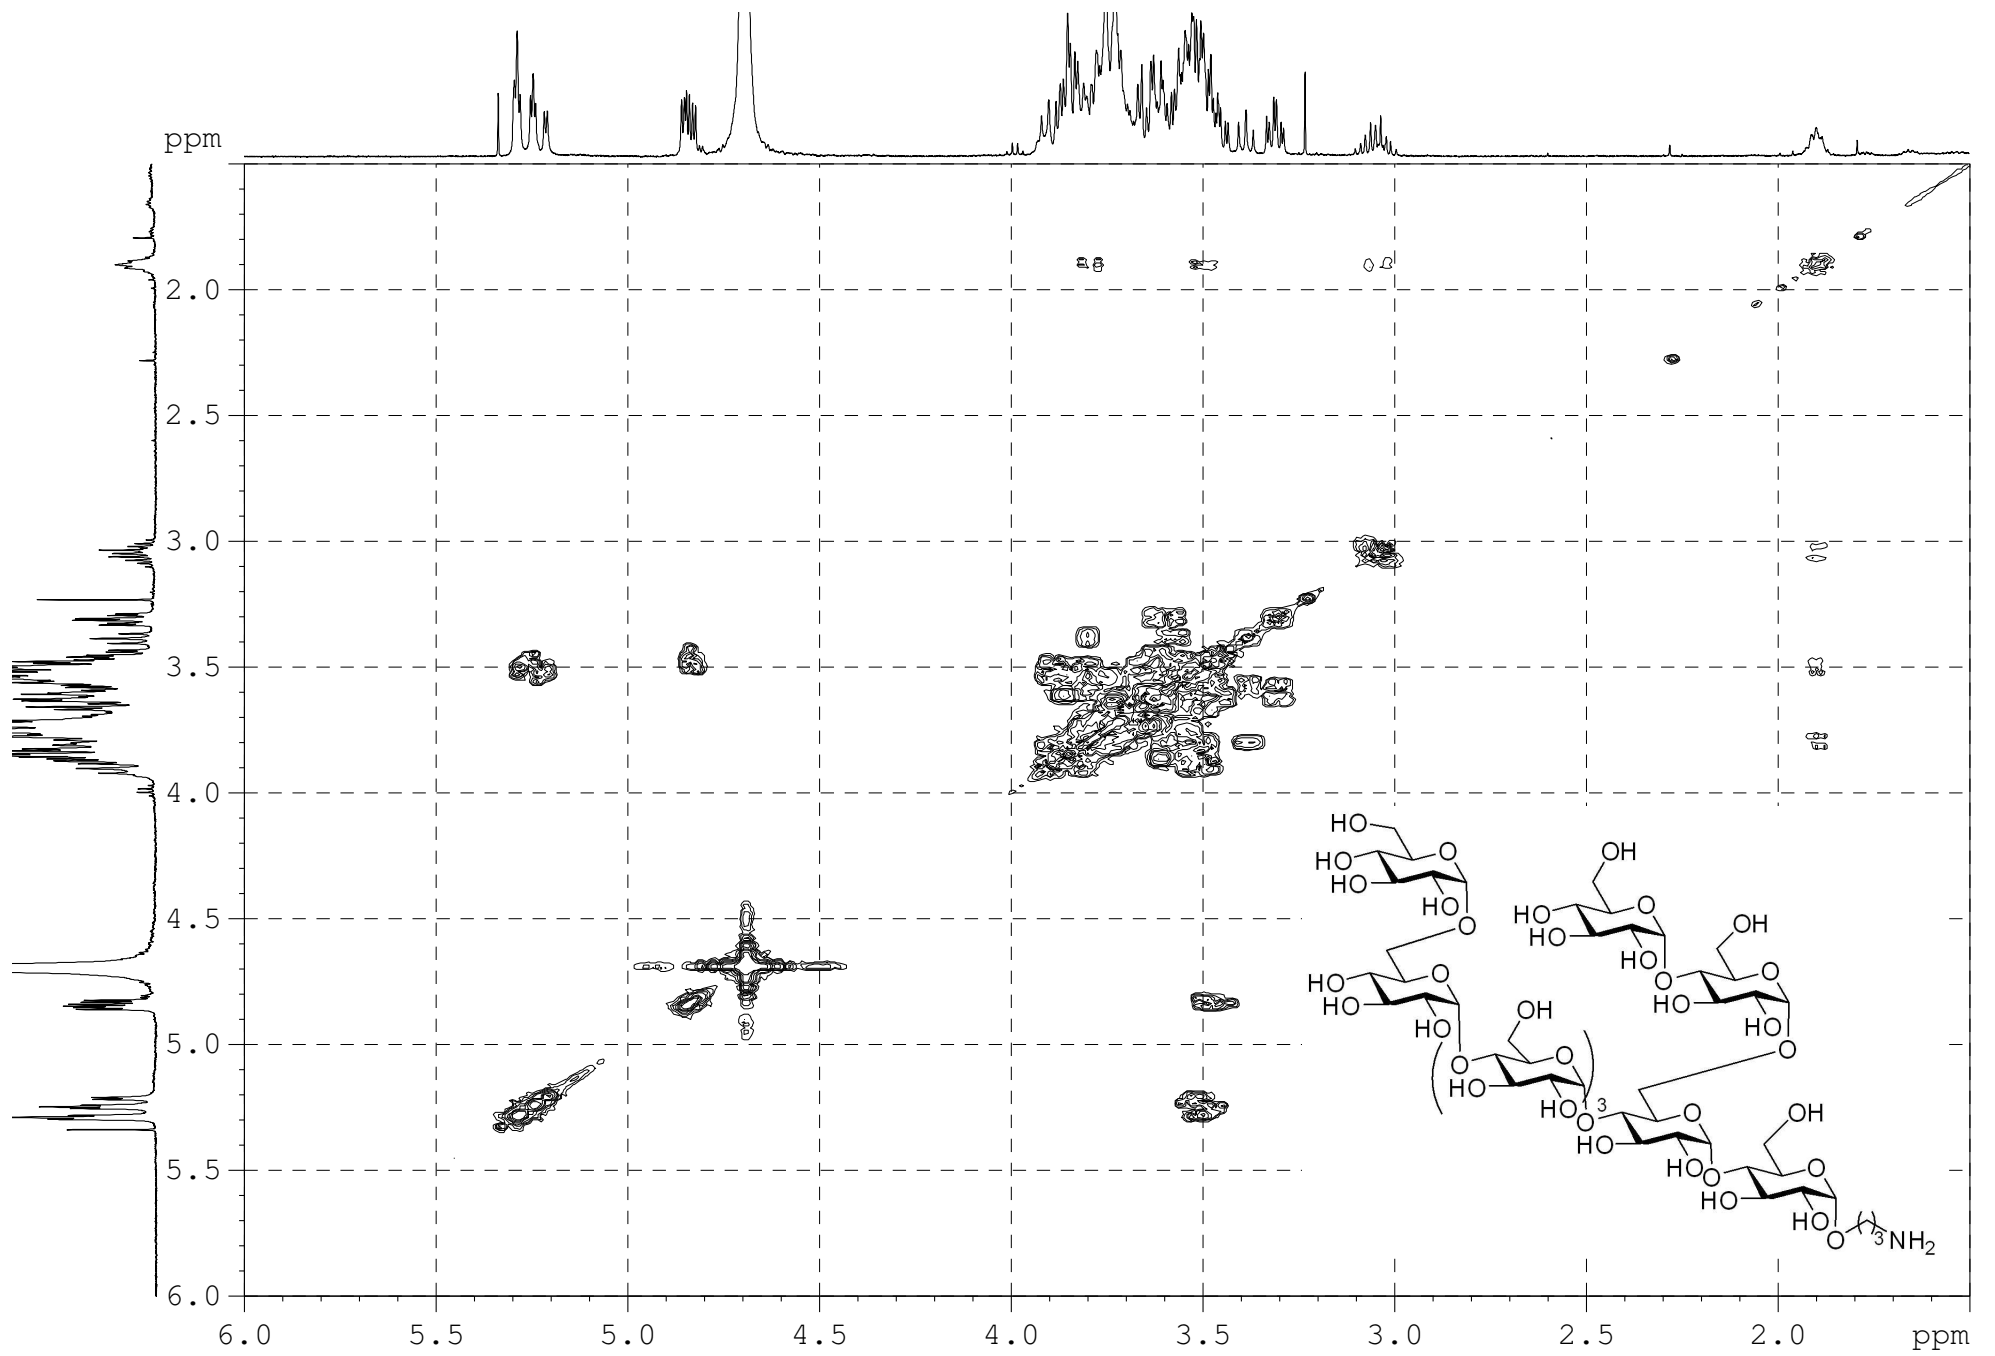

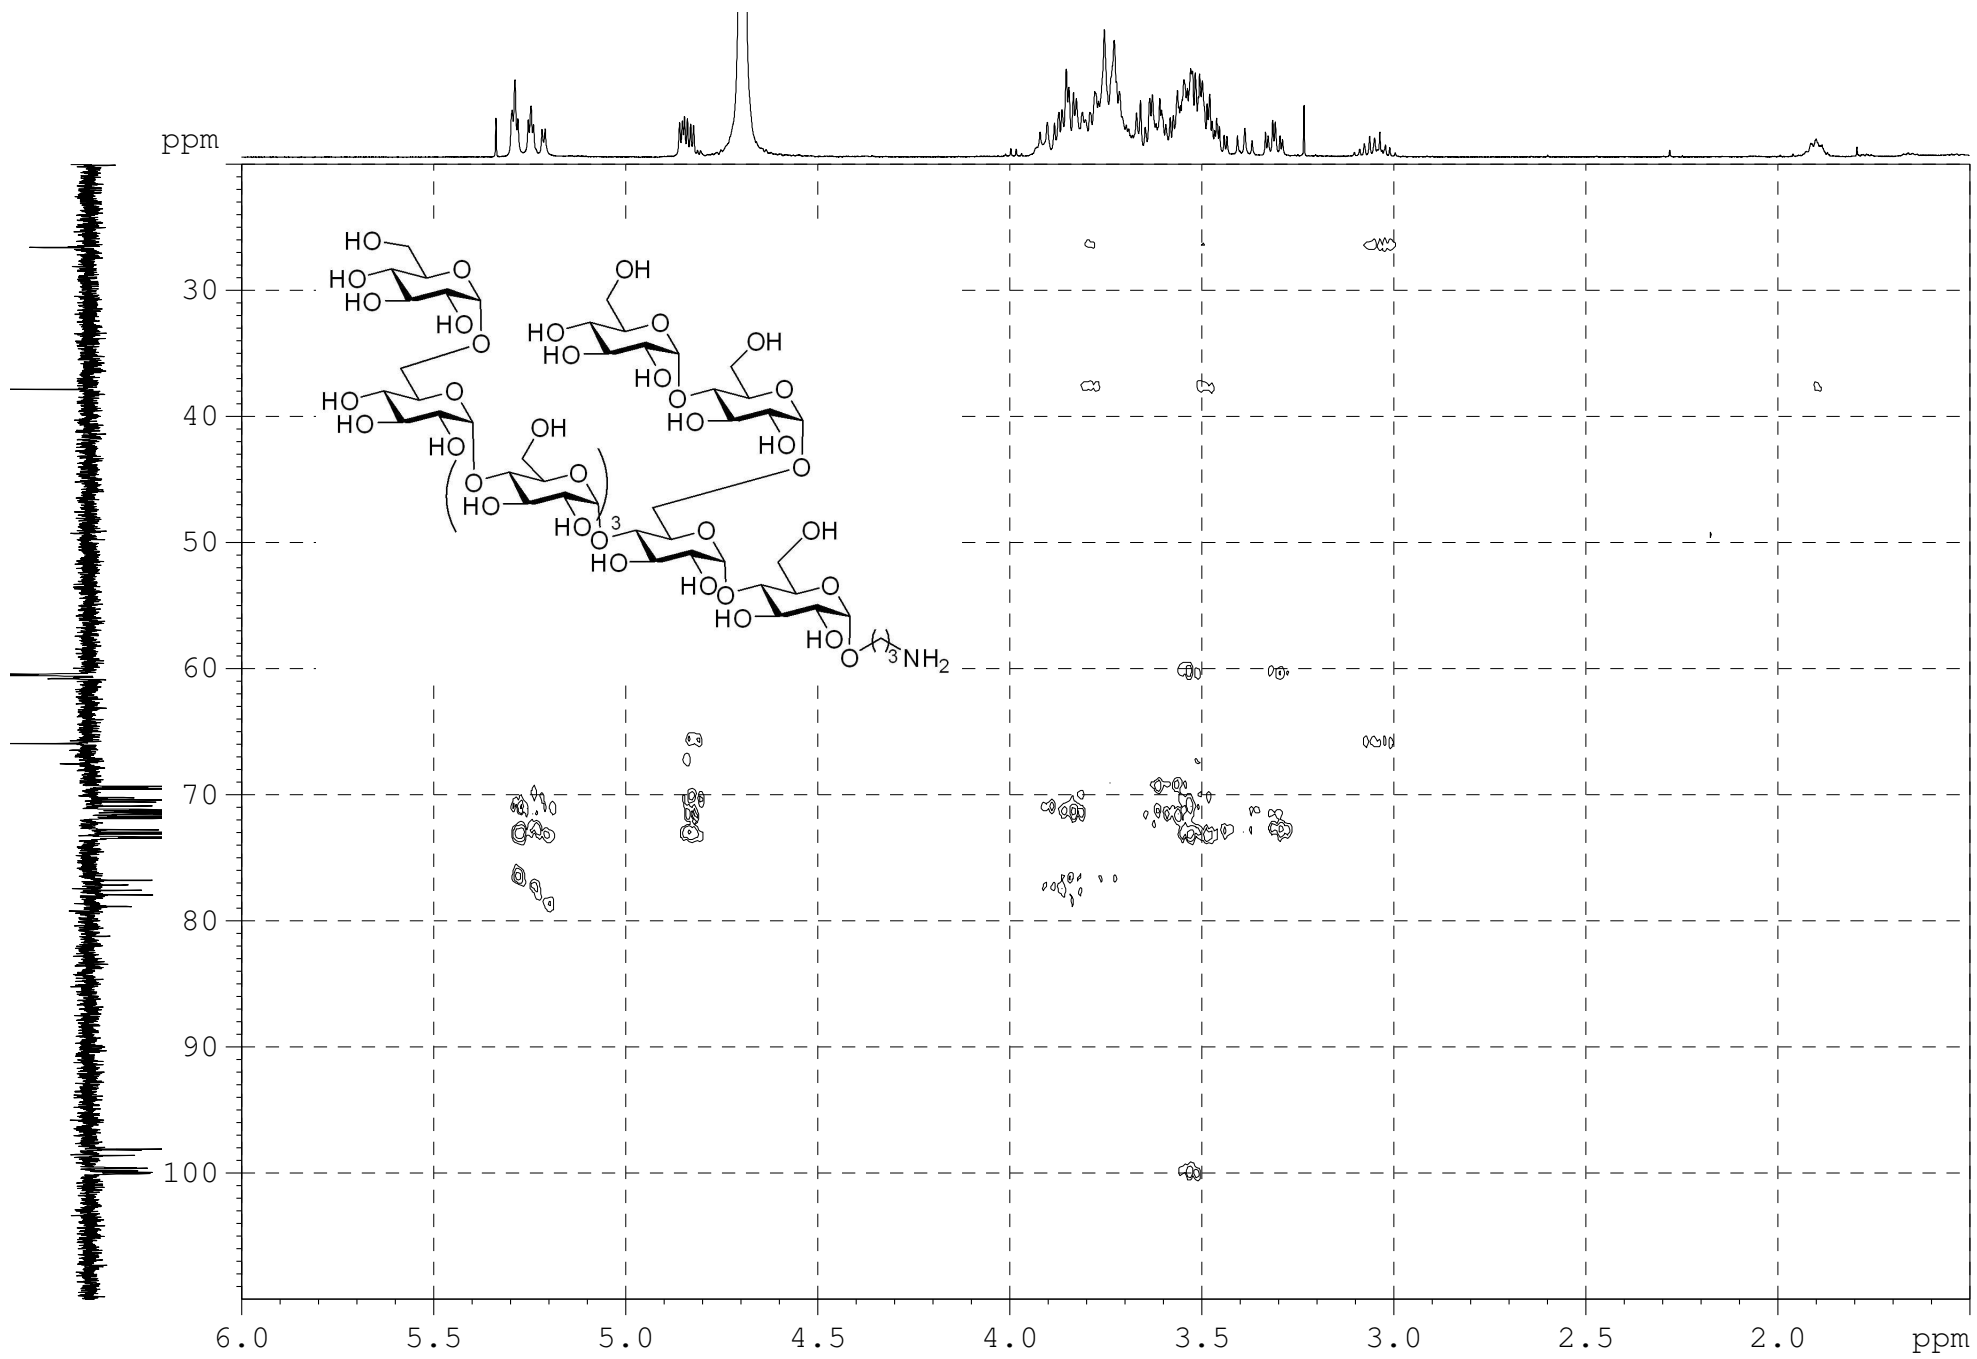

Supplement: ja8b00669_si_001.pdf [file ja8b00669_si_001.pdf]
